# Supplementary material for: Multiplexed proteomics of autophagy-deficient murine macrophages reveals enhanced antimicrobial immunity via the oxidative stress response
Source: eLife. 2021 Jun 4;10:e62320. doi: 10.7554/eLife.62320 (PMC8177894; doi:10.7554/eLife.62320)
Supplement: Supplementary file 1. [file elife-62320-supp1.xlsx]

## Sheet: PHOS ALL_DATA
Cluster	Identifier	WT Uninfected 1 Phos	WT Uninfected 3 Phos	WT Uninfected 4 Phos	WT Early 1 Phos	WT Early 2 Phos	WT Early 3 Phos	WT Early 4 Phos	WT Late 1 Phos	WT Late 2 Phos	WT Late 3 Phos	WT Late 4 Phos	KO Uninfected 1 Phos	KO Uninfected 2 Phos	KO Uninfected 3 Phos	KO Early 1 Phos	KO Early 2 Phos	KO Early 3 Phos	KO Early 4 Phos	KO Late 1 Phos	KO Late 2 Phos	KO Late 3 Phos	KO Late 4 Phos	WT Uninfected 1 Global	WT Uninfected 3 Global	WT Uninfected 4 Global	WT Early 1 Global	WT Early 2 Global	WT Early 3 Global	WT Early 4 Global	WT Late 1 Global	WT Late 2 Global	WT Late 3 Global	WT Late 4 Global	KO Uninfected 1 Global	KO Uninfected 2 Global	KO Uninfected 3 Global	KO Early 1 Global	KO Early 2 Global	KO Early 3 Global	KO Early 4 Global	KO Late 1 Global	KO Late 2 Global	KO Late 3 Global	KO Late 4 Global
1	AMPD3_MOUSE|O08739_S85	0.196966	0.203024	0.203081	0.207211	0.209189	0.212612	0.208025	0.206709	0.209845	0.206324	0.208883	0.205595	0.210778	0.217479	0.222061	0.230657	0.224704	0.217899	0.224212	0.223963	0.220981	0.216475	0.207951	0.206035	0.211115	0.20611	0.206954	0.205114	0.207243	0.20849	0.208809	0.207768	0.207092	0.219544	0.219635	0.221018	0.216064	0.219429	0.220485	0.216823	0.216117	0.21948	0.220679	0.216693
1	CACO1_MOUSE|Q8CGU1_S563	0.202625	0.207468	0.196289	0.200671	0.193004	0.204012	0.206469	0.204469	0.198944	0.206629	0.208275	0.224725	0.22723	0.221761	0.226602	0.223155	0.222536	0.213105	0.230549	0.225425	0.222622	0.217291	0.20607	0.203239	0.20611	0.207612	0.204393	0.20574	0.206095	0.20469	0.206847	0.206821	0.204567	0.220581	0.218145	0.223445	0.220445	0.222484	0.21995	0.220928	0.218265	0.220222	0.218875	0.221948
1	CATA_MOUSE|P24270_S21	0.20974	0.208567	0.207953	0.205462	0.204705	0.207311	0.21075	0.204502	0.20363	0.203933	0.20874	0.220665	0.220108	0.220348	0.219789	0.220861	0.217805	0.217876	0.220674	0.220037	0.219076	0.215658	0.207551	0.203921	0.206731	0.208027	0.20403	0.206498	0.207336	0.206851	0.203566	0.205179	0.207587	0.221215	0.220767	0.219624	0.219701	0.221154	0.220876	0.219842	0.218297	0.219774	0.22011	0.219194
1	CATA_MOUSE|P24270_S517	0.20813	0.203864	0.208295	0.204418	0.20294	0.207213	0.209839	0.205931	0.205688	0.210629	0.210404	0.219668	0.223017	0.217398	0.218551	0.220976	0.218142	0.215157	0.219758	0.222392	0.219258	0.216546	0.207551	0.203921	0.206731	0.208027	0.20403	0.206498	0.207336	0.206851	0.203566	0.205179	0.207587	0.221215	0.220767	0.219624	0.219701	0.221154	0.220876	0.219842	0.218297	0.219774	0.22011	0.219194
1	FGR_MOUSE|P14234_S50	0.194932	0.200646	0.199181	0.203231	0.202983	0.205088	0.208364	0.201337	0.204922	0.201692	0.205133	0.21424	0.222666	0.213774	0.226321	0.229732	0.225768	0.227388	0.225947	0.227367	0.22015	0.22301	0.205777	0.207607	0.209894	0.205505	0.207096	0.204767	0.208894	0.208522	0.213667	0.205245	0.210114	0.216701	0.222414	0.214531	0.214404	0.21915	0.217738	0.220532	0.218857	0.218523	0.219237	0.219537
1	GCH1_MOUSE|Q05915_S51	0.19336	0.197495	0.199245	0.203387	0.202831	0.20608	0.208411	0.202118	0.202688	0.206328	0.209949	0.216622	0.207286	0.212121	0.229231	0.23234	0.227097	0.220221	0.227957	0.227827	0.227659	0.222999	0.204398	0.205848	0.204627	0.205896	0.202237	0.206012	0.207647	0.209235	0.209	0.208256	0.21271	0.217516	0.220701	0.221803	0.219348	0.219794	0.217474	0.217211	0.222539	0.221436	0.218908	0.215531
1	GPR84_MOUSE|Q8CIM5_S221	0.199016	0.210038	0.205966	0.205004	0.200994	0.201543	0.201677	0.220843	0.213644	0.216308	0.213518	0.21685	0.219545	0.216864	0.215958	0.211817	0.213715	0.214595	0.226582	0.220269	0.221652	0.221068	0.197573	0.203573	0.204634	0.203419	0.196277	0.204736	0.20382	0.217784	0.213112	0.211751	0.214438	0.215319	0.215809	0.213212	0.21886	0.21784	0.218515	0.218578	0.228679	0.22422	0.222215	0.222246
1	GPR84_MOUSE|Q8CIM5_S224	0.186676	0.207687	0.204181	0.203518	0.197092	0.199695	0.195458	0.220849	0.215349	0.214988	0.226166	0.22084	0.219267	0.212739	0.214038	0.212156	0.212823	0.215036	0.235522	0.224153	0.221382	0.224218	0.197573	0.203573	0.204634	0.203419	0.196277	0.204736	0.20382	0.217784	0.213112	0.211751	0.214438	0.215319	0.215809	0.213212	0.21886	0.21784	0.218515	0.218578	0.228679	0.22422	0.222215	0.222246
1	GPR84_MOUSE|Q8CIM5_S251	0.207555	0.217884	0.212904	0.208824	0.207665	0.204566	0.202545	0.206966	0.204544	0.200844	0.210721	0.22001	0.218867	0.217517	0.219546	0.21627	0.217273	0.219743	0.223081	0.213773	0.219684	0.217455	0.197573	0.203573	0.204634	0.203419	0.196277	0.204736	0.20382	0.217784	0.213112	0.211751	0.214438	0.215319	0.215809	0.213212	0.21886	0.21784	0.218515	0.218578	0.228679	0.22422	0.222215	0.222246
1	HA1B_MOUSE|P01901_S354	0.200698	0.203338	0.198579	0.205768	0.207003	0.209056	0.209242	0.205105	0.204025	0.206549	0.207019	0.217496	0.22076	0.215675	0.222235	0.228524	0.223552	0.220073	0.220538	0.222273	0.220694	0.218467	0.209593	0.212085	0.194405	0.205053	0.208932	0.208784	0.207196	0.209698	0.21147	0.208449	0.208656	0.218461	0.221253	0.218801	0.215887	0.219153	0.218932	0.214183	0.216866	0.221181	0.219844	0.219363
1	IFI5A_MOUSE|Q8CGE8_T106	0.194369	0.199938	0.202026	0.182884	0.200144	0.193971	0.196102	0.220773	0.228458	0.21608	0.223192	0.214158	0.213946	0.21473	0.205539	0.218141	0.21596	0.213062	0.23168	0.235997	0.225456	0.233655	0.204748	0.201058	0.203087	0.203209	0.207436	0.200621	0.206443	0.213691	0.219406	0.210408	0.214497	0.212866	0.216688	0.219344	0.211397	0.216167	0.220008	0.214696	0.222732	0.222261	0.223462	0.223377
1	IFIT1_MOUSE|Q64282_S272	0.202951	0.204962	0.207841	0.196032	0.204637	0.197744	0.204256	0.217365	0.226372	0.212617	0.218537	0.214408	0.217758	0.218826	0.209475	0.212946	0.215751	0.212505	0.22223	0.224156	0.221999	0.223375	0.201673	0.200163	0.203049	0.197821	0.202393	0.195786	0.205714	0.211837	0.21925	0.212711	0.21771	0.216	0.218516	0.217189	0.215346	0.218771	0.219947	0.214651	0.223369	0.225831	0.225357	0.223062
1	IFIT3_MOUSE|Q64345_S327	0.215512	0.19846	0.193083	0.209995	0.207356	0.200174	0.206192	0.20981	0.211626	0.215769	0.224775	0.217039	0.215137	0.210396	0.214783	0.216173	0.218317	0.21379	0.218936	0.21813	0.22506	0.226427	0.204072	0.201533	0.212384	0.197201	0.201422	0.196049	0.205157	0.206714	0.214557	0.207202	0.212958	0.219007	0.221112	0.224331	0.216727	0.222054	0.220245	0.215593	0.220353	0.224315	0.221413	0.22194
1	IFIX_MOUSE|Q8BV49_S176	0.210423	0.211949	0.217627	0.197426	0.202345	0.192872	0.204621	0.205014	0.214143	0.204007	0.211648	0.223663	0.227411	0.229214	0.2124	0.215125	0.215459	0.214136	0.219508	0.220573	0.218802	0.217913	0.204255	0.20331	0.214371	0.196273	0.206229	0.193983	0.203581	0.202349	0.209162	0.198224	0.206895	0.221245	0.223527	0.223856	0.21774	0.224192	0.223466	0.222251	0.218838	0.223216	0.224945	0.222987
1	IFIXL_MOUSE|Q504N7_S125	0.200047	0.203587	0.2047	0.189504	0.204116	0.188629	0.199861	0.200666	0.208498	0.195457	0.208245	0.227704	0.228325	0.223186	0.215144	0.223432	0.224534	0.220761	0.226619	0.228179	0.231944	0.227706	0.204045	0.204102	0.213716	0.197457	0.206859	0.197779	0.204004	0.202227	0.211204	0.201832	0.208823	0.220886	0.22333	0.223003	0.21604	0.223554	0.222034	0.217881	0.218454	0.2238	0.223672	0.221398
1	IFIXL_MOUSE|Q504N7_S152	0.207288	0.208244	0.21527	0.200022	0.211135	0.204042	0.208729	0.200133	0.210325	0.205484	0.210795	0.220533	0.223639	0.220013	0.215821	0.219945	0.217566	0.2162	0.218074	0.221312	0.216504	0.21701	0.204045	0.204102	0.213716	0.197457	0.206859	0.197779	0.204004	0.202227	0.211204	0.201832	0.208823	0.220886	0.22333	0.223003	0.21604	0.223554	0.222034	0.217881	0.218454	0.2238	0.223672	0.221398
1	IFIXL_MOUSE|Q504N7_T129	0.201029	0.208663	0.2003	0.192199	0.20046	0.186613	0.196163	0.202169	0.211415	0.196408	0.208818	0.22295	0.225163	0.229659	0.218388	0.221266	0.22617	0.218431	0.229099	0.22868	0.228996	0.227735	0.204045	0.204102	0.213716	0.197457	0.206859	0.197779	0.204004	0.202227	0.211204	0.201832	0.208823	0.220886	0.22333	0.223003	0.21604	0.223554	0.222034	0.217881	0.218454	0.2238	0.223672	0.221398
1	IFIXL_MOUSE|Q504N7_T154	0.210455	0.207751	0.215108	0.203136	0.21117	0.199283	0.206993	0.205315	0.214443	0.200205	0.208024	0.217597	0.22057	0.224082	0.213892	0.216144	0.220052	0.219848	0.216796	0.217188	0.220977	0.218922	0.204045	0.204102	0.213716	0.197457	0.206859	0.197779	0.204004	0.202227	0.211204	0.201832	0.208823	0.220886	0.22333	0.223003	0.21604	0.223554	0.222034	0.217881	0.218454	0.2238	0.223672	0.221398
1	MRP_MOUSE|P28667_S22	0.210147	0.198667	0.223004	0.21238	0.209156	0.203216	0.200722	0.219243	0.219852	0.205849	0.216566	0.212703	0.212255	0.220142	0.209479	0.20601	0.219363	0.215764	0.213343	0.213988	0.22355	0.222465	0.203218	0.181243	0.215594	0.206978	0.20328	0.199433	0.196818	0.219146	0.218882	0.208056	0.21852	0.212089	0.21116	0.217915	0.212425	0.212687	0.225567	0.221192	0.218875	0.221034	0.230479	0.229391
1	MRP_MOUSE|P28667_S36	0.199561	0.183643	0.211534	0.212027	0.210085	0.209268	0.20628	0.220559	0.222729	0.21077	0.219148	0.206013	0.210029	0.210336	0.21232	0.214957	0.223199	0.220096	0.214297	0.2197	0.223642	0.225867	0.203218	0.181243	0.215594	0.206978	0.20328	0.199433	0.196818	0.219146	0.218882	0.208056	0.21852	0.212089	0.21116	0.217915	0.212425	0.212687	0.225567	0.221192	0.218875	0.221034	0.230479	0.229391
1	MRP_MOUSE|P28667_T148	0.195824	0.190885	0.199221	0.213394	0.212186	0.203586	0.202783	0.219267	0.215614	0.20591	0.214264	0.201151	0.203772	0.211913	0.217528	0.222574	0.229808	0.225135	0.221157	0.221915	0.229219	0.227108	0.203218	0.181243	0.215594	0.206978	0.20328	0.199433	0.196818	0.219146	0.218882	0.208056	0.21852	0.212089	0.21116	0.217915	0.212425	0.212687	0.225567	0.221192	0.218875	0.221034	0.230479	0.229391
1	MRP_MOUSE|P28667_T85	0.204578	0.190695	0.217549	0.212999	0.206975	0.199166	0.201541	0.220629	0.220402	0.206969	0.215406	0.20845	0.213717	0.223207	0.209548	0.209894	0.220811	0.21844	0.216511	0.217599	0.226022	0.225328	0.203218	0.181243	0.215594	0.206978	0.20328	0.199433	0.196818	0.219146	0.218882	0.208056	0.21852	0.212089	0.21116	0.217915	0.212425	0.212687	0.225567	0.221192	0.218875	0.221034	0.230479	0.229391
1	NBR1_MOUSE|P97432_S657	0.196814	0.189442	0.18582	0.206451	0.20745	0.207346	0.209226	0.197463	0.195579	0.197752	0.19599	0.22689	0.225474	0.23211	0.231617	0.230164	0.231264	0.22864	0.218961	0.222388	0.221453	0.220556	0.209612	0.204523	0.21281	0.202548	0.205827	0.203799	0.205378	0.20406	0.205218	0.201097	0.201087	0.223736	0.22014	0.228377	0.220805	0.221054	0.221452	0.223233	0.218134	0.215836	0.218282	0.219601
1	NRAM1_MOUSE|P41251_S14	0.201736	0.209162	0.208131	0.201936	0.200437	0.197814	0.19998	0.206872	0.206275	0.203265	0.207316	0.218602	0.223768	0.226976	0.22075	0.221133	0.220334	0.217664	0.224169	0.224959	0.222952	0.221405	0.206247	0.210348	0.197564	0.205699	0.203908	0.205192	0.206458	0.207142	0.203745	0.206402	0.204326	0.222239	0.22392	0.215141	0.221218	0.221063	0.224151	0.218484	0.220158	0.22126	0.223042	0.219135
1	NUCB1_MOUSE|Q02819_S368	0.203577	0.196319	0.213495	0.194257	0.195247	0.198394	0.197772	0.208627	0.198701	0.203187	0.203531	0.207212	0.226395	0.224241	0.230774	0.225239	0.222223	0.221108	0.224586	0.232602	0.230695	0.223353	0.210305	0.192827	0.222405	0.200198	0.208309	0.208319	0.204754	0.215184	0.207845	0.214609	0.212789	0.196895	0.22162	0.213983	0.222836	0.216701	0.217125	0.214239	0.215235	0.227728	0.225385	0.217206
1	NUCB1_MOUSE|Q02819_S456	0.200064	0.191163	0.207603	0.192803	0.190711	0.189225	0.187148	0.204641	0.195608	0.197214	0.197836	0.208212	0.230861	0.232666	0.233919	0.227707	0.228505	0.226812	0.228148	0.235801	0.238878	0.228166	0.210305	0.192827	0.222405	0.200198	0.208309	0.208319	0.204754	0.215184	0.207845	0.214609	0.212789	0.196895	0.22162	0.213983	0.222836	0.216701	0.217125	0.214239	0.215235	0.227728	0.225385	0.217206
1	NUCB1_MOUSE|Q02819_S85	0.206272	0.197914	0.215291	0.199926	0.196429	0.201307	0.2011	0.211885	0.203208	0.203278	0.207397	0.204284	0.225561	0.223195	0.227211	0.222801	0.21834	0.220177	0.221263	0.22853	0.227559	0.221541	0.210305	0.192827	0.222405	0.200198	0.208309	0.208319	0.204754	0.215184	0.207845	0.214609	0.212789	0.196895	0.22162	0.213983	0.222836	0.216701	0.217125	0.214239	0.215235	0.227728	0.225385	0.217206
1	NUCB2_MOUSE|P81117_S89	0.202677	0.188624	0.207229	0.193719	0.190977	0.197991	0.197489	0.207418	0.201598	0.201042	0.202891	0.211558	0.228743	0.229206	0.229385	0.225946	0.224578	0.224898	0.228465	0.230031	0.228764	0.226293	0.211147	0.191686	0.214378	0.19644	0.200712	0.203903	0.204309	0.212382	0.207625	0.208187	0.208728	0.206495	0.223486	0.223345	0.223992	0.221081	0.220429	0.217681	0.218843	0.225197	0.223617	0.222028
1	PDLI4_MOUSE|P70271_S111	0.214306	0.206713	0.20356	0.208782	0.205865	0.205803	0.207504	0.205036	0.20226	0.203522	0.20286	0.224057	0.225126	0.227015	0.220472	0.216498	0.221822	0.217621	0.21599	0.215998	0.220042	0.216363	0.207312	0.199494	0.206022	0.209478	0.204043	0.20717	0.207231	0.209633	0.205505	0.204678	0.20698	0.221305	0.219058	0.222505	0.218337	0.219375	0.222659	0.220587	0.218025	0.218287	0.221173	0.218823
1	PDLI4_MOUSE|P70271_S115	0.208286	0.207923	0.203238	0.207462	0.202631	0.207034	0.205041	0.208333	0.202253	0.201471	0.201609	0.222353	0.215414	0.229169	0.218147	0.219967	0.224856	0.218421	0.224199	0.220309	0.222346	0.216071	0.207312	0.199494	0.206022	0.209478	0.204043	0.20717	0.207231	0.209633	0.205505	0.204678	0.20698	0.221305	0.219058	0.222505	0.218337	0.219375	0.222659	0.220587	0.218025	0.218287	0.221173	0.218823
1	PDLI4_MOUSE|P70271_S118	0.20831	0.20585	0.208541	0.20603	0.20451	0.203568	0.210503	0.208598	0.205223	0.20691	0.209731	0.22055	0.220279	0.222121	0.218513	0.217647	0.218554	0.216721	0.220499	0.219884	0.219127	0.21668	0.207312	0.199494	0.206022	0.209478	0.204043	0.20717	0.207231	0.209633	0.205505	0.204678	0.20698	0.221305	0.219058	0.222505	0.218337	0.219375	0.222659	0.220587	0.218025	0.218287	0.221173	0.218823
1	PHF11_MOUSE|A6H5X4_S17	0.205516	0.211914	0.210369	0.196717	0.202326	0.195009	0.202457	0.2034	0.208027	0.208514	0.208869	0.224436	0.214908	0.22848	0.218823	0.221993	0.218038	0.21259	0.223678	0.225323	0.223834	0.220534	0.204334	0.207191	0.210299	0.200762	0.209113	0.20418	0.208266	0.203658	0.212621	0.205582	0.210385	0.218016	0.222247	0.219449	0.217399	0.221727	0.219643	0.21619	0.217375	0.222749	0.218769	0.2181
1	PHF11_MOUSE|A6H5X4_S170	0.194417	0.19847	0.202788	0.20792	0.212759	0.201165	0.209127	0.207893	0.214378	0.206515	0.208964	0.201434	0.20524	0.216481	0.221274	0.226252	0.225178	0.222792	0.223698	0.228515	0.225765	0.224081	0.204334	0.207191	0.210299	0.200762	0.209113	0.20418	0.208266	0.203658	0.212621	0.205582	0.210385	0.218016	0.222247	0.219449	0.217399	0.221727	0.219643	0.21619	0.217375	0.222749	0.218769	0.2181
1	RN213_MOUSE|E9Q555_S3236	0.199422	0.199017	0.200218	0.200982	0.200807	0.199902	0.203326	0.207586	0.205284	0.207489	0.211016	0.220376	0.2231	0.217745	0.221381	0.220318	0.222123	0.217812	0.229115	0.225458	0.228208	0.224092	0.210946	0.215324	0.214106	0.208453	0.209751	0.207829	0.209123	0.209512	0.209947	0.207813	0.209411	0.21585	0.21643	0.214535	0.21542	0.216164	0.217419	0.214969	0.216439	0.217147	0.217993	0.215212
1	SN_MOUSE|Q62230_S1677	0.207247	0.209081	0.210551	0.202084	0.20838	0.20367	0.205435	0.200297	0.207096	0.20349	0.202758	0.221373	0.226019	0.226327	0.216866	0.223897	0.221189	0.218879	0.21521	0.222685	0.219236	0.215069	0.205711	0.203934	0.210522	0.202791	0.20691	0.200145	0.205046	0.203164	0.206202	0.201542	0.205005	0.219652	0.224427	0.226819	0.21695	0.223619	0.221112	0.218237	0.217589	0.223122	0.223338	0.220532
1	SQSTM_MOUSE|Q64337_S226	0.194196	0.189889	0.191894	0.195029	0.190259	0.192079	0.194754	0.202729	0.195187	0.200747	0.199362	0.231847	0.233264	0.233848	0.230056	0.22996	0.228936	0.224131	0.231631	0.223597	0.232757	0.227988	0.195518	0.192035	0.195332	0.19596	0.190799	0.193232	0.194436	0.207716	0.205209	0.206039	0.207479	0.225552	0.225464	0.228028	0.226166	0.227624	0.228888	0.222537	0.228447	0.226079	0.230122	0.226273
1	SQSTM_MOUSE|Q64337_S275	0.197944	0.191812	0.189235	0.198379	0.195367	0.201616	0.203939	0.202651	0.197339	0.21113	0.212738	0.229616	0.224357	0.213811	0.231999	0.225351	0.227257	0.223737	0.231117	0.223671	0.224319	0.223075	0.195518	0.192035	0.195332	0.19596	0.190799	0.193232	0.194436	0.207716	0.205209	0.206039	0.207479	0.225552	0.225464	0.228028	0.226166	0.227624	0.228888	0.222537	0.228447	0.226079	0.230122	0.226273
1	SQSTM_MOUSE|Q64337_S276	0.188933	0.19022	0.188457	0.19799	0.194561	0.189428	0.193027	0.205884	0.203078	0.197875	0.20562	0.221336	0.2165	0.227289	0.232915	0.230689	0.23394	0.224481	0.233562	0.225664	0.239776	0.232955	0.195518	0.192035	0.195332	0.19596	0.190799	0.193232	0.194436	0.207716	0.205209	0.206039	0.207479	0.225552	0.225464	0.228028	0.226166	0.227624	0.228888	0.222537	0.228447	0.226079	0.230122	0.226273
1	SQSTM_MOUSE|Q64337_S277	0.18978	0.197553	0.194154	0.19182	0.190204	0.196954	0.196198	0.203285	0.198455	0.202838	0.200686	0.224294	0.226068	0.224072	0.233777	0.230442	0.226595	0.221417	0.239547	0.226268	0.234526	0.227035	0.195518	0.192035	0.195332	0.19596	0.190799	0.193232	0.194436	0.207716	0.205209	0.206039	0.207479	0.225552	0.225464	0.228028	0.226166	0.227624	0.228888	0.222537	0.228447	0.226079	0.230122	0.226273
1	SQSTM_MOUSE|Q64337_S290	0.199315	0.190559	0.181245	0.202999	0.203683	0.207734	0.203778	0.202962	0.199617	0.196358	0.195297	0.223158	0.222043	0.227367	0.229493	0.229083	0.232169	0.229637	0.225666	0.221623	0.228276	0.226425	0.195518	0.192035	0.195332	0.19596	0.190799	0.193232	0.194436	0.207716	0.205209	0.206039	0.207479	0.225552	0.225464	0.228028	0.226166	0.227624	0.228888	0.222537	0.228447	0.226079	0.230122	0.226273
1	SQSTM_MOUSE|Q64337_S308	0.190503	0.18756	0.183526	0.201355	0.20451	0.208569	0.205515	0.199365	0.193997	0.196971	0.197675	0.2305	0.231231	0.228981	0.23275	0.233049	0.234961	0.228599	0.224617	0.220062	0.221818	0.220059	0.195518	0.192035	0.195332	0.19596	0.190799	0.193232	0.194436	0.207716	0.205209	0.206039	0.207479	0.225552	0.225464	0.228028	0.226166	0.227624	0.228888	0.222537	0.228447	0.226079	0.230122	0.226273
1	SQSTM_MOUSE|Q64337_S367	0.192356	0.191084	0.196292	0.200406	0.193792	0.195027	0.196568	0.20496	0.199949	0.202752	0.204428	0.225028	0.228567	0.22574	0.227744	0.22386	0.228226	0.22554	0.231217	0.227552	0.230571	0.22693	0.195518	0.192035	0.195332	0.19596	0.190799	0.193232	0.194436	0.207716	0.205209	0.206039	0.207479	0.225552	0.225464	0.228028	0.226166	0.227624	0.228888	0.222537	0.228447	0.226079	0.230122	0.226273
1	SQSTM_MOUSE|Q64337_S368	0.187277	0.184605	0.188509	0.193729	0.190626	0.19353	0.197616	0.202528	0.203365	0.200372	0.20491	0.228741	0.231941	0.229253	0.228279	0.228034	0.229538	0.226726	0.233679	0.230405	0.231298	0.228813	0.195518	0.192035	0.195332	0.19596	0.190799	0.193232	0.194436	0.207716	0.205209	0.206039	0.207479	0.225552	0.225464	0.228028	0.226166	0.227624	0.228888	0.222537	0.228447	0.226079	0.230122	0.226273
1	SQSTM_MOUSE|Q64337_T269	0.215366	0.214569	0.211127	0.19788	0.193296	0.193819	0.196923	0.211184	0.210175	0.209944	0.206748	0.227328	0.227037	0.232626	0.219479	0.213376	0.217993	0.21588	0.218197	0.217177	0.21994	0.215015	0.195518	0.192035	0.195332	0.19596	0.190799	0.193232	0.194436	0.207716	0.205209	0.206039	0.207479	0.225552	0.225464	0.228028	0.226166	0.227624	0.228888	0.222537	0.228447	0.226079	0.230122	0.226273
1	SQSTM_MOUSE|Q64337_T269_S275	0.201982	0.200142	0.203159	0.210406	0.206145	0.21307	0.212967	0.211497	0.20636	0.210019	0.211279	0.21047	0.207529	0.210393	0.227458	0.227902	0.224317	0.222565	0.218061	0.218094	0.216894	0.216729	0.195518	0.192035	0.195332	0.19596	0.190799	0.193232	0.194436	0.207716	0.205209	0.206039	0.207479	0.225552	0.225464	0.228028	0.226166	0.227624	0.228888	0.222537	0.228447	0.226079	0.230122	0.226273
1	SQSTM_MOUSE|Q64337_T269_T271	0.210981	0.205545	0.200211	0.212276	0.208515	0.207441	0.209688	0.211155	0.208873	0.206525	0.208816	0.213494	0.212277	0.216764	0.219069	0.220109	0.225243	0.222912	0.216629	0.216939	0.218421	0.216684	0.195518	0.192035	0.195332	0.19596	0.190799	0.193232	0.194436	0.207716	0.205209	0.206039	0.207479	0.225552	0.225464	0.228028	0.226166	0.227624	0.228888	0.222537	0.228447	0.226079	0.230122	0.226273
1	SQSTM_MOUSE|Q64337_T269_T272	0.201905	0.202839	0.204149	0.210954	0.204433	0.212045	0.213135	0.210983	0.205196	0.20995	0.211605	0.210985	0.207922	0.20995	0.227991	0.22815	0.224815	0.221248	0.218889	0.218232	0.216212	0.215917	0.195518	0.192035	0.195332	0.19596	0.190799	0.193232	0.194436	0.207716	0.205209	0.206039	0.207479	0.225552	0.225464	0.228028	0.226166	0.227624	0.228888	0.222537	0.228447	0.226079	0.230122	0.226273
1	SQSTM_MOUSE|Q64337_T271	0.206291	0.199107	0.205057	0.202128	0.198805	0.203896	0.204322	0.214433	0.213588	0.213698	0.215479	0.21809	0.21909	0.218314	0.220779	0.218262	0.220364	0.21819	0.22045	0.218885	0.219498	0.218841	0.195518	0.192035	0.195332	0.19596	0.190799	0.193232	0.194436	0.207716	0.205209	0.206039	0.207479	0.225552	0.225464	0.228028	0.226166	0.227624	0.228888	0.222537	0.228447	0.226079	0.230122	0.226273
1	SQSTM_MOUSE|Q64337_T271_T272	0.209581	0.20658	0.198852	0.207544	0.205936	0.20939	0.208619	0.209998	0.205272	0.208511	0.209613	0.21209	0.212795	0.214336	0.225203	0.225894	0.225142	0.221853	0.218824	0.217755	0.217511	0.21654	0.195518	0.192035	0.195332	0.19596	0.190799	0.193232	0.194436	0.207716	0.205209	0.206039	0.207479	0.225552	0.225464	0.228028	0.226166	0.227624	0.228888	0.222537	0.228447	0.226079	0.230122	0.226273
1	SQSTM_MOUSE|Q64337_T272	0.20041	0.20143	0.203187	0.207683	0.204151	0.202986	0.203763	0.215735	0.213052	0.210939	0.21204	0.207425	0.210233	0.214009	0.224348	0.219693	0.224363	0.221976	0.223502	0.22077	0.223433	0.22183	0.195518	0.192035	0.195332	0.19596	0.190799	0.193232	0.194436	0.207716	0.205209	0.206039	0.207479	0.225552	0.225464	0.228028	0.226166	0.227624	0.228888	0.222537	0.228447	0.226079	0.230122	0.226273
1	TAXB1_MOUSE|Q3UKC1_S693	0.196045	0.194131	0.176	0.209439	0.208119	0.213565	0.210706	0.201155	0.198294	0.199081	0.199454	0.222327	0.216923	0.222416	0.230701	0.229218	0.230433	0.225161	0.226953	0.221181	0.226291	0.222191	0.214336	0.213032	0.21774	0.207128	0.206147	0.210011	0.209153	0.205038	0.208937	0.205768	0.204895	0.221538	0.217204	0.221673	0.217789	0.217761	0.216214	0.216985	0.214367	0.214019	0.213506	0.215824
1	XCT_MOUSE|Q9WTR6_S26	0.191147	0.201652	0.193209	0.189125	0.186083	0.193189	0.19547	0.210133	0.201589	0.201359	0.204795	0.224699	0.224034	0.227984	0.225583	0.22689	0.228013	0.218588	0.237245	0.236895	0.232816	0.225524	0.202883	0.193676	0.194372	0.187221	0.194067	0.190157	0.193141	0.213874	0.208183	0.208494	0.212675	0.215992	0.215624	0.22595	0.221436	0.222076	0.227393	0.218197	0.23558	0.232975	0.235099	0.229506
1	ZBP1_MOUSE|Q9QY24_S383	0.201981	0.197607	0.200683	0.204499	0.210914	0.195064	0.208049	0.206554	0.213324	0.198095	0.20991	0.207168	0.213396	0.218242	0.217972	0.225504	0.229374	0.223975	0.221022	0.226297	0.228713	0.226206	0.205788	0.19778	0.211867	0.196527	0.20417	0.19048	0.202972	0.200075	0.207902	0.195425	0.204559	0.222364	0.225653	0.230666	0.21794	0.225968	0.22744	0.221731	0.218154	0.223661	0.227322	0.224173
1	ZBP1_MOUSE|Q9QY24_S384	0.194748	0.189523	0.200943	0.198456	0.209033	0.199753	0.207343	0.201377	0.210457	0.20132	0.208729	0.209193	0.214371	0.21779	0.222952	0.231459	0.229978	0.223205	0.224038	0.23167	0.22965	0.226093	0.205788	0.19778	0.211867	0.196527	0.20417	0.19048	0.202972	0.200075	0.207902	0.195425	0.204559	0.222364	0.225653	0.230666	0.21794	0.225968	0.22744	0.221731	0.218154	0.223661	0.227322	0.224173
2	BCL3_MOUSE|Q9Z2F6_S39	0.202445	0.202563	0.201361	0.207268	0.205512	0.204121	0.206667	0.224189	0.228884	0.224262	0.226521	0.207021	0.20823	0.208563	0.208804	0.207356	0.208966	0.2093	0.223212	0.223548	0.2224	0.224875	0.200594	0.203681	0.206208	0.208424	0.209025	0.20516	0.205874	0.228213	0.232428	0.222572	0.227362	0.201423	0.199821	0.208015	0.206767	0.207106	0.207624	0.210409	0.22367	0.221912	0.222876	0.225988
2	BCOR_MOUSE|Q8CGN4_S1131	0.203123	0.204441	0.200945	0.200172	0.197119	0.204534	0.204299	0.23008	0.232301	0.229472	0.232772	0.207212	0.206018	0.205371	0.203774	0.20306	0.201071	0.2045	0.230714	0.229869	0.223314	0.227652	0.212337	0.203145	0.20817	0.210756	0.210862	0.203198	0.205455	0.216055	0.220231	0.227594	0.230741	0.210884	0.214326	0.202093	0.210037	0.210217	0.205902	0.206769	0.213541	0.217444	0.221912	0.225555
2	BCOR_MOUSE|Q8CGN4_S1441	0.205684	0.199524	0.209247	0.200646	0.202047	0.203238	0.207964	0.236275	0.243152	0.233381	0.238138	0.199095	0.204753	0.199861	0.197012	0.192608	0.198454	0.200973	0.227162	0.228255	0.22281	0.227592	0.212337	0.203145	0.20817	0.210756	0.210862	0.203198	0.205455	0.216055	0.220231	0.227594	0.230741	0.210884	0.214326	0.202093	0.210037	0.210217	0.205902	0.206769	0.213541	0.217444	0.221912	0.225555
2	BCOR_MOUSE|Q8CGN4_S423	0.201409	0.205014	0.204187	0.204647	0.203241	0.204514	0.205106	0.227457	0.229205	0.227329	0.226924	0.205701	0.202433	0.209373	0.207441	0.206128	0.205809	0.206961	0.227144	0.226686	0.224173	0.223856	0.212337	0.203145	0.20817	0.210756	0.210862	0.203198	0.205455	0.216055	0.220231	0.227594	0.230741	0.210884	0.214326	0.202093	0.210037	0.210217	0.205902	0.206769	0.213541	0.217444	0.221912	0.225555
2	BCOR_MOUSE|Q8CGN4_S488	0.204211	0.204832	0.200092	0.205831	0.205781	0.209543	0.207244	0.229087	0.227671	0.224304	0.226637	0.20422	0.207422	0.209656	0.207254	0.205646	0.208085	0.207855	0.227288	0.22222	0.219268	0.221786	0.212337	0.203145	0.20817	0.210756	0.210862	0.203198	0.205455	0.216055	0.220231	0.227594	0.230741	0.210884	0.214326	0.202093	0.210037	0.210217	0.205902	0.206769	0.213541	0.217444	0.221912	0.225555
2	CEBPB_MOUSE|P28033_T188	0.20807	0.202595	0.20549	0.209068	0.208847	0.206927	0.207975	0.220966	0.221633	0.220895	0.224761	0.207994	0.210435	0.204326	0.209774	0.207907	0.210082	0.210828	0.223018	0.218626	0.22277	0.224744	0.201563	0.202381	0.199194	0.21101	0.209802	0.206256	0.207627	0.224337	0.226234	0.221884	0.22751	0.205835	0.204142	0.204725	0.211923	0.206716	0.212847	0.210016	0.221696	0.222343	0.223663	0.224549
2	FOS_MOUSE|P01101_S133	0.200982	0.199551	0.203028	0.212595	0.213348	0.214354	0.212744	0.224513	0.229912	0.22963	0.226557	0.201628	0.202266	0.204934	0.211679	0.209624	0.209247	0.207372	0.21826	0.217934	0.217405	0.218682	0.187828	0.174987	0.20154	0.227417	0.237765	0.231905	0.23108	0.211691	0.221584	0.214381	0.217889	0.193097	0.190994	0.18637	0.219731	0.220813	0.226483	0.228695	0.210259	0.211758	0.213566	0.216587
2	IKBZ_MOUSE|Q9EST8_S189	0.211616	0.18542	0.192323	0.213209	0.212913	0.211912	0.214668	0.21807	0.218627	0.227956	0.227634	0.206529	0.207155	0.191429	0.212387	0.21113	0.215631	0.210961	0.219285	0.218438	0.228194	0.2284	0.188367	0.169521	0.170713	0.225301	0.219191	0.217933	0.219727	0.228591	0.224729	0.23553	0.232575	0.173708	0.178624	0.175532	0.224246	0.216341	0.219802	0.215107	0.228414	0.228016	0.235985	0.235192
2	IKBZ_MOUSE|Q9EST8_S262	0.16256	0.187231	0.183193	0.219356	0.213927	0.205747	0.208466	0.235888	0.232613	0.237749	0.238726	0.176658	0.177075	0.18266	0.221252	0.209738	0.210947	0.200984	0.241264	0.236745	0.239858	0.237632	0.188367	0.169521	0.170713	0.225301	0.219191	0.217933	0.219727	0.228591	0.224729	0.23553	0.232575	0.173708	0.178624	0.175532	0.224246	0.216341	0.219802	0.215107	0.228414	0.228016	0.235985	0.235192
2	IKBZ_MOUSE|Q9EST8_T192	0.193538	0.186579	0.184082	0.218439	0.212782	0.20845	0.211946	0.223603	0.222706	0.232681	0.230493	0.19557	0.193573	0.183703	0.219254	0.209954	0.215585	0.210203	0.225357	0.228349	0.234313	0.235598	0.188367	0.169521	0.170713	0.225301	0.219191	0.217933	0.219727	0.228591	0.224729	0.23553	0.232575	0.173708	0.178624	0.175532	0.224246	0.216341	0.219802	0.215107	0.228414	0.228016	0.235985	0.235192
2	IL1B_MOUSE|P10749_S134	0.181467	0.175643	0.208583	0.202402	0.204234	0.194267	0.20087	0.235657	0.233357	0.239527	0.245079	0.185886	0.179132	0.186452	0.20733	0.189707	0.197549	0.202134	0.252899	0.241964	0.242421	0.250962	0.186772	0.187025	0.194873	0.205353	0.208456	0.192534	0.1996	0.244238	0.239867	0.238419	0.25113	0.180944	0.183814	0.188063	0.204831	0.184203	0.194884	0.194574	0.247534	0.236928	0.242758	0.250139
2	JUNB_MOUSE|P09450_S23	0.19546	0.202753	0.202678	0.211458	0.215015	0.209548	0.209243	0.222525	0.224617	0.221508	0.22339	0.205238	0.202626	0.206647	0.214197	0.212164	0.212343	0.21188	0.218612	0.221588	0.22018	0.223381	0.189279	0.195081	0.194906	0.218632	0.21959	0.214195	0.215317	0.223387	0.226283	0.223808	0.223641	0.193298	0.194846	0.197178	0.21724	0.213324	0.216074	0.214261	0.223495	0.222028	0.222749	0.224252
2	JUNB_MOUSE|P09450_S256	0.179765	0.192308	0.193011	0.223037	0.225641	0.216583	0.21682	0.225013	0.226478	0.22121	0.225982	0.182505	0.189661	0.197144	0.2227	0.21638	0.215848	0.214305	0.224523	0.221873	0.222357	0.225358	0.189279	0.195081	0.194906	0.218632	0.21959	0.214195	0.215317	0.223387	0.226283	0.223808	0.223641	0.193298	0.194846	0.197178	0.21724	0.213324	0.216074	0.214261	0.223495	0.222028	0.222749	0.224252
2	JUNB_MOUSE|P09450_T252	0.200344	0.203413	0.201263	0.211367	0.209176	0.203652	0.207693	0.222665	0.223721	0.223051	0.225188	0.20398	0.203756	0.205161	0.213232	0.203973	0.207663	0.209002	0.226508	0.225268	0.227805	0.227606	0.189279	0.195081	0.194906	0.218632	0.21959	0.214195	0.215317	0.223387	0.226283	0.223808	0.223641	0.193298	0.194846	0.197178	0.21724	0.213324	0.216074	0.214261	0.223495	0.222028	0.222749	0.224252
2	JUNB_MOUSE|P09450_T252_S256	0.187195	0.192715	0.195413	0.214108	0.218627	0.212358	0.213311	0.221568	0.226342	0.221363	0.224979	0.197063	0.199222	0.195182	0.217073	0.21117	0.216628	0.215035	0.226812	0.224009	0.226359	0.226037	0.189279	0.195081	0.194906	0.218632	0.21959	0.214195	0.215317	0.223387	0.226283	0.223808	0.223641	0.193298	0.194846	0.197178	0.21724	0.213324	0.216074	0.214261	0.223495	0.222028	0.222749	0.224252
2	PIM1_MOUSE|P06803_S32	0.191596	0.192553	0.192558	0.216747	0.215974	0.209688	0.213639	0.223129	0.222046	0.223379	0.227357	0.193572	0.192146	0.198153	0.219109	0.211549	0.213821	0.214686	0.22796	0.226781	0.22719	0.227999	0.190101	0.184005	0.185821	0.225214	0.222409	0.215538	0.22023	0.222016	0.220248	0.223707	0.225038	0.187695	0.185807	0.190007	0.222213	0.2155	0.219818	0.22074	0.222778	0.224728	0.22434	0.229477
2	RPGF2_MOUSE|Q8CHG7_S1315	0.203007	0.206572	0.208244	0.206018	0.206571	0.208822	0.206448	0.23329	0.235408	0.225684	0.228271	0.200895	0.203659	0.206364	0.197956	0.199688	0.205181	0.204789	0.225687	0.227247	0.218528	0.225108	0.208932	0.211118	0.208441	0.206024	0.20424	0.210255	0.210369	0.221061	0.222353	0.21757	0.218904	0.208977	0.207489	0.211103	0.211819	0.209297	0.20968	0.208975	0.222406	0.221294	0.219257	0.219173
2	RSAD2_MOUSE|Q8CBB9_T72	0.212843	0.22167	0.220767	0.208237	0.211089	0.209088	0.213113	0.212478	0.215996	0.211651	0.214782	0.212617	0.218069	0.205243	0.212806	0.211603	0.213888	0.212181	0.212714	0.215047	0.214992	0.208822	0.199239	0.200052	0.199614	0.190259	0.193054	0.188749	0.189032	0.231198	0.238534	0.231782	0.239464	0.203875	0.203806	0.197489	0.199894	0.200933	0.201304	0.206677	0.240069	0.236737	0.240831	0.238412
2	TAGAP_MOUSE|B2RWW0_S488	0.198897	0.200013	0.203961	0.206928	0.202726	0.201785	0.205668	0.236814	0.232178	0.24159	0.24135	0.198503	0.19635	0.201648	0.203586	0.197903	0.197338	0.194068	0.231493	0.229119	0.225536	0.229151	0.198078	0.177897	0.193001	0.205246	0.203787	0.200631	0.208719	0.236151	0.239953	0.248907	0.256041	0.192131	0.198385	0.186547	0.202916	0.206054	0.181315	0.196839	0.221849	0.230224	0.235324	0.244167
2	TAGAP_MOUSE|B2RWW0_S68	0.179731	0.190196	0.178849	0.212205	0.212888	0.209434	0.208386	0.24368	0.237921	0.238885	0.24429	0.182244	0.188186	0.184521	0.20859	0.211297	0.209487	0.205732	0.236509	0.225178	0.229761	0.22955	0.198078	0.177897	0.193001	0.205246	0.203787	0.200631	0.208719	0.236151	0.239953	0.248907	0.256041	0.192131	0.198385	0.186547	0.202916	0.206054	0.181315	0.196839	0.221849	0.230224	0.235324	0.244167
2	TNAP3_MOUSE|Q60769_S220	0.188359	0.175407	0.168893	0.216567	0.217529	0.215212	0.218297	0.216769	0.215832	0.220594	0.221833	0.190281	0.189643	0.186983	0.225671	0.222043	0.225551	0.224142	0.232546	0.230889	0.233694	0.234771	0.19239	0.19095	0.195756	0.210242	0.21135	0.205225	0.209859	0.220833	0.222961	0.222703	0.227318	0.196603	0.196276	0.199561	0.217098	0.210517	0.211911	0.210857	0.231483	0.231038	0.231052	0.235078
2	TNAP3_MOUSE|Q60769_S381	0.176055	0.196329	0.196539	0.214121	0.213208	0.215012	0.213512	0.222101	0.221519	0.216404	0.222231	0.17871	0.18418	0.197596	0.22317	0.218073	0.212272	0.216068	0.241309	0.238912	0.227378	0.230376	0.19239	0.19095	0.195756	0.210242	0.21135	0.205225	0.209859	0.220833	0.222961	0.222703	0.227318	0.196603	0.196276	0.199561	0.217098	0.210517	0.211911	0.210857	0.231483	0.231038	0.231052	0.235078
2	TNAP3_MOUSE|Q60769_S498	0.177301	0.182891	0.17833	0.219507	0.215934	0.213085	0.214824	0.222089	0.217818	0.221838	0.222822	0.180874	0.184291	0.190616	0.225617	0.222629	0.221013	0.21857	0.237021	0.235254	0.233028	0.235356	0.19239	0.19095	0.195756	0.210242	0.21135	0.205225	0.209859	0.220833	0.222961	0.222703	0.227318	0.196603	0.196276	0.199561	0.217098	0.210517	0.211911	0.210857	0.231483	0.231038	0.231052	0.235078
2	TNAP3_MOUSE|Q60769_S571	0.190676	0.193938	0.199122	0.203788	0.204426	0.207571	0.207041	0.216095	0.214525	0.214782	0.216982	0.196612	0.200885	0.201677	0.220145	0.213889	0.213742	0.213019	0.241101	0.238796	0.234261	0.237039	0.19239	0.19095	0.195756	0.210242	0.21135	0.205225	0.209859	0.220833	0.222961	0.222703	0.227318	0.196603	0.196276	0.199561	0.217098	0.210517	0.211911	0.210857	0.231483	0.231038	0.231052	0.235078
2	TNAP3_MOUSE|Q60769_S573	0.180246	0.188948	0.187289	0.222884	0.223335	0.208301	0.211381	0.223694	0.219618	0.220955	0.222376	0.165072	0.181537	0.194925	0.227305	0.22311	0.217526	0.211499	0.23334	0.231921	0.236051	0.238564	0.19239	0.19095	0.195756	0.210242	0.21135	0.205225	0.209859	0.220833	0.222961	0.222703	0.227318	0.196603	0.196276	0.199561	0.217098	0.210517	0.211911	0.210857	0.231483	0.231038	0.231052	0.235078
2	TNAP3_MOUSE|Q60769_S622	0.166155	0.179791	0.181737	0.22228	0.215055	0.213483	0.214999	0.222866	0.208114	0.218808	0.218745	0.185588	0.181088	0.190141	0.232539	0.231317	0.226362	0.222649	0.229047	0.239493	0.23202	0.235457	0.19239	0.19095	0.195756	0.210242	0.21135	0.205225	0.209859	0.220833	0.222961	0.222703	0.227318	0.196603	0.196276	0.199561	0.217098	0.210517	0.211911	0.210857	0.231483	0.231038	0.231052	0.235078
2	TNAP3_MOUSE|Q60769_S730	0.175174	0.179388	0.182012	0.220602	0.220742	0.216104	0.219114	0.225212	0.222997	0.226861	0.228508	0.174479	0.180814	0.189327	0.224407	0.221133	0.218349	0.213313	0.23258	0.235641	0.22892	0.233085	0.19239	0.19095	0.195756	0.210242	0.21135	0.205225	0.209859	0.220833	0.222961	0.222703	0.227318	0.196603	0.196276	0.199561	0.217098	0.210517	0.211911	0.210857	0.231483	0.231038	0.231052	0.235078
2	TRAF1_MOUSE|P39428_S60	0.19706	0.203472	0.2021	0.205693	0.209014	0.200888	0.205379	0.222244	0.224536	0.220907	0.226475	0.20156	0.206349	0.21042	0.209122	0.21556	0.209758	0.211178	0.226629	0.227096	0.222187	0.227847	0.202471	0.202507	0.205351	0.196036	0.195029	0.1995	0.201553	0.228504	0.229822	0.225507	0.229821	0.207126	0.206623	0.207051	0.207477	0.205747	0.207279	0.206576	0.231047	0.23179	0.225018	0.23024
2	TRAF1_MOUSE|P39428_S63	0.200968	0.207126	0.206562	0.200964	0.198682	0.205399	0.202308	0.220897	0.22191	0.214604	0.221742	0.210966	0.210178	0.212491	0.209468	0.213866	0.210968	0.21291	0.229051	0.228033	0.219757	0.227501	0.202471	0.202507	0.205351	0.196036	0.195029	0.1995	0.201553	0.228504	0.229822	0.225507	0.229821	0.207126	0.206623	0.207051	0.207477	0.205747	0.207279	0.206576	0.231047	0.23179	0.225018	0.23024
2	TTP_MOUSE|P22893_S178	0.18275	0.195484	0.195778	0.229905	0.238114	0.21761	0.217628	0.225647	0.230487	0.226348	0.223227	0.164532	0.176333	0.200333	0.21922	0.217008	0.215202	0.214127	0.222883	0.219931	0.219779	0.22074	0.193212	0.19052	0.197623	0.222227	0.221455	0.215016	0.217122	0.222824	0.224099	0.222787	0.222639	0.195697	0.195523	0.188809	0.219558	0.212305	0.220564	0.215332	0.216147	0.217147	0.22665	0.225231
2	TTP_MOUSE|P22893_S52	0.188626	0.197048	0.180996	0.225536	0.227637	0.220769	0.220373	0.226027	0.23023	0.225298	0.22442	0.181303	0.185217	0.190035	0.216303	0.215393	0.2188	0.214296	0.221236	0.223005	0.221249	0.223008	0.193212	0.19052	0.197623	0.222227	0.221455	0.215016	0.217122	0.222824	0.224099	0.222787	0.222639	0.195697	0.195523	0.188809	0.219558	0.212305	0.220564	0.215332	0.216147	0.217147	0.22665	0.225231
3	2A5G_MOUSE|Q60996_S497	0.209728	0.217533	0.210062	0.214159	0.21571	0.213489	0.211698	0.217018	0.216315	0.212055	0.212799	0.209095	0.211856	0.21585	0.212272	0.213037	0.213685	0.212487	0.213424	0.213367	0.212861	0.211666	0.213728	0.215222	0.214759	0.214684	0.215384	0.213064	0.214419	0.213552	0.214452	0.215109	0.212024	0.212423	0.212484	0.213757	0.212504	0.211061	0.212528	0.212653	0.212897	0.210844	0.213346	0.209406
3	3BP1_MOUSE|P55194_S510	0.208545	0.206216	0.209273	0.213225	0.214622	0.216332	0.216049	0.208644	0.211739	0.207501	0.208178	0.213808	0.21498	0.215215	0.215994	0.218305	0.219638	0.217329	0.212763	0.215094	0.212842	0.213439	0.211878	0.207424	0.214158	0.211303	0.212806	0.212338	0.212505	0.211689	0.212132	0.211102	0.211952	0.214475	0.21454	0.215541	0.213817	0.215665	0.216066	0.214592	0.212439	0.214558	0.215252	0.21399
3	3BP2_MOUSE|Q06649_S414	0.20838	0.212647	0.20687	0.213163	0.214548	0.210788	0.210239	0.210619	0.213335	0.20834	0.208595	0.211308	0.212446	0.214205	0.216166	0.218082	0.218499	0.218398	0.214599	0.215051	0.216889	0.21665	0.211615	0.210737	0.21288	0.213139	0.213333	0.212999	0.213892	0.210594	0.212684	0.212371	0.212712	0.21349	0.215788	0.212014	0.214896	0.215365	0.2145	0.215153	0.21127	0.214437	0.213183	0.21326
3	A0A087WP63_MOUSE|A0A087WP63_S1683	0.21072	0.213736	0.214128	0.215271	0.217619	0.215855	0.213851	0.213388	0.21455	0.2092	0.212976	0.208686	0.211779	0.213918	0.212263	0.214018	0.215278	0.214864	0.212129	0.213495	0.210145	0.212314	0.213521	0.217684	0.214008	0.212816	0.212819	0.213092	0.208967	0.215595	0.213258	0.211912	0.210623	0.211745	0.212214	0.212519	0.213054	0.212762	0.214926	0.213512	0.214062	0.21239	0.215136	0.213648
3	A0A087WP63_MOUSE|A0A087WP63_T564	0.207896	0.218971	0.215981	0.213609	0.216584	0.211418	0.21228	0.212315	0.210847	0.212019	0.210656	0.207639	0.207701	0.213355	0.213305	0.221684	0.214548	0.215725	0.213643	0.215549	0.213132	0.210968	0.213521	0.217684	0.214008	0.212816	0.212819	0.213092	0.208967	0.215595	0.213258	0.211912	0.210623	0.211745	0.212214	0.212519	0.213054	0.212762	0.214926	0.213512	0.214062	0.21239	0.215136	0.213648
3	A0JLR7_MOUSE|A0JLR7_S744	0.204299	0.215085	0.208848	0.215126	0.217795	0.212282	0.214305	0.208199	0.21421	0.208841	0.20776	0.206224	0.208948	0.212773	0.217647	0.221458	0.21933	0.219265	0.212103	0.218703	0.213772	0.212352	0.213333	0.212519	0.21593	0.213904	0.215825	0.213516	0.213949	0.213244	0.216842	0.213251	0.21434	0.211988	0.212674	0.213249	0.211167	0.211746	0.210767	0.214145	0.210707	0.212083	0.211582	0.213522
3	A0JLR7_MOUSE|A0JLR7_S957	0.209715	0.213314	0.209907	0.210949	0.213779	0.212539	0.21257	0.208955	0.210956	0.214582	0.210456	0.213158	0.21082	0.21338	0.216177	0.217344	0.214335	0.214724	0.217065	0.216597	0.214962	0.213835	0.213333	0.212519	0.21593	0.213904	0.215825	0.213516	0.213949	0.213244	0.216842	0.213251	0.21434	0.211988	0.212674	0.213249	0.211167	0.211746	0.210767	0.214145	0.210707	0.212083	0.211582	0.213522
3	A2AUY4_MOUSE|A2AUY4_S1437	0.208992	0.211223	0.212521	0.208324	0.214659	0.214359	0.215704	0.213197	0.208311	0.214975	0.216156	0.216707	0.211249	0.208074	0.218394	0.221079	0.213689	0.216202	0.213351	0.210007	0.209235	0.213403	0.211133	0.215339	0.2154	0.212397	0.212848	0.21313	0.210502	0.214036	0.215639	0.211094	0.212785	0.211281	0.21036	0.213606	0.21386	0.213574	0.211054	0.214265	0.213822	0.213667	0.215424	0.215058
3	A6H6J9_MOUSE|A6H6J9_S177	0.20571	0.210689	0.208674	0.21172	0.218221	0.216926	0.214044	0.21254	0.21716	0.212104	0.212763	0.202778	0.206495	0.212739	0.214728	0.218971	0.216683	0.216378	0.216328	0.218999	0.211616	0.213212	0.205529	0.208947	0.21373	0.21203	0.21565	0.212889	0.211826	0.213879	0.214127	0.210482	0.213387	0.214752	0.216531	0.212391	0.214372	0.21328	0.214495	0.216136	0.213165	0.213144	0.213816	0.215559
3	AAGAB_MOUSE|Q8R2R3_S211	0.204269	0.210455	0.197678	0.210192	0.227317	0.217645	0.21114	0.214351	0.213988	0.211738	0.212584	0.215295	0.209657	0.206012	0.214862	0.22139	0.217633	0.217857	0.203714	0.215118	0.215379	0.220054	0.21473	0.216772	0.213827	0.214108	0.215416	0.211435	0.210751	0.213272	0.214366	0.212573	0.206671	0.21694	0.21204	0.218943	0.21184	0.212649	0.213929	0.215607	0.21001	0.208748	0.211393	0.214006
3	AB1IP_MOUSE|Q8R5A3_S532	0.21003	0.209382	0.211571	0.211504	0.216871	0.212718	0.213822	0.216451	0.215787	0.214083	0.217883	0.20589	0.207829	0.215315	0.21168	0.217758	0.213463	0.211509	0.213912	0.215381	0.211724	0.215364	0.213848	0.208845	0.215125	0.214365	0.214799	0.212951	0.213701	0.213166	0.213612	0.212557	0.21418	0.212942	0.212992	0.212501	0.212453	0.212354	0.215186	0.213265	0.212143	0.211421	0.213977	0.213939
3	AB1IP_MOUSE|Q8R5A3_T534	0.210568	0.207923	0.209817	0.211093	0.216813	0.213396	0.214863	0.215758	0.215792	0.21516	0.218397	0.207501	0.208704	0.214449	0.211458	0.218066	0.214178	0.211069	0.213376	0.21528	0.21148	0.214791	0.213848	0.208845	0.215125	0.214365	0.214799	0.212951	0.213701	0.213166	0.213612	0.212557	0.21418	0.212942	0.212992	0.212501	0.212453	0.212354	0.215186	0.213265	0.212143	0.211421	0.213977	0.213939
3	ABD12_MOUSE|Q99LR1_S52	0.206349	0.218169	0.209999	0.21382	0.218632	0.218864	0.2137	0.208566	0.208099	0.209627	0.208632	0.211384	0.208829	0.206312	0.217046	0.223357	0.216983	0.219009	0.213089	0.214903	0.21247	0.211478	0.213744	0.221305	0.217742	0.212525	0.213709	0.215364	0.211687	0.214636	0.211522	0.213663	0.211795	0.213962	0.213939	0.20837	0.211054	0.211825	0.21026	0.211794	0.213329	0.212892	0.212832	0.212128
3	ABL1_MOUSE|P00520_S807	0.208054	0.207919	0.206903	0.210785	0.216069	0.210836	0.212669	0.214922	0.216445	0.211797	0.214026	0.206288	0.209251	0.210725	0.213996	0.214416	0.217484	0.216969	0.221089	0.214679	0.21727	0.217048	0.212669	0.217371	0.218156	0.212911	0.214842	0.212481	0.213349	0.213104	0.212943	0.210781	0.21173	0.213345	0.21464	0.212485	0.212631	0.212456	0.212646	0.212794	0.211874	0.211962	0.211892	0.213207
3	ABL2_MOUSE|Q4JIM5_S785	0.215495	0.214474	0.210872	0.214865	0.214681	0.217803	0.214453	0.210503	0.213947	0.211509	0.21144	0.213439	0.212746	0.209979	0.212515	0.214639	0.215393	0.214436	0.211158	0.212058	0.210708	0.213105	0.213637	0.213652	0.214727	0.212126	0.214811	0.212954	0.211908	0.210683	0.2113	0.211001	0.211331	0.213904	0.21427	0.213676	0.213065	0.215691	0.212334	0.217874	0.212283	0.213122	0.210265	0.21563
3	ACINU_MOUSE|Q9JIX8_S382	0.214021	0.20743	0.20923	0.215902	0.212646	0.212959	0.213571	0.215401	0.209646	0.213484	0.212181	0.211507	0.21028	0.213471	0.214923	0.216303	0.218508	0.215134	0.210296	0.214628	0.216177	0.21236	0.215075	0.211082	0.215168	0.214563	0.21359	0.213924	0.213288	0.214266	0.214437	0.213465	0.212981	0.21141	0.212365	0.212749	0.212676	0.213514	0.213952	0.213138	0.210717	0.211154	0.213234	0.21359
3	ADCY9_MOUSE|P51830_S1259	0.208698	0.215831	0.207505	0.213343	0.212381	0.213054	0.212965	0.214984	0.216618	0.218704	0.215461	0.210523	0.212262	0.207905	0.212454	0.211149	0.209564	0.20895	0.217599	0.217295	0.216055	0.216556	0.21508	0.218134	0.21771	0.21242	0.216186	0.213927	0.210752	0.214055	0.212773	0.213011	0.211749	0.213447	0.212736	0.212498	0.210792	0.211687	0.21244	0.212704	0.212039	0.211407	0.212656	0.212016
3	ADDG_MOUSE|Q9QYB5_S621	0.214798	0.205597	0.201249	0.214049	0.213886	0.218012	0.218057	0.213268	0.210155	0.211287	0.21324	0.216503	0.215452	0.208327	0.211873	0.218243	0.217609	0.218787	0.211905	0.211695	0.209185	0.216276	0.213067	0.214576	0.215506	0.213833	0.216455	0.211752	0.21549	0.214433	0.214753	0.212502	0.212628	0.212438	0.212916	0.213705	0.212344	0.211023	0.211301	0.214409	0.2116	0.210974	0.209518	0.215037
3	AFAD_MOUSE|Q9QZQ1_S1211	0.20986	0.209827	0.207416	0.212467	0.213479	0.214921	0.214343	0.215242	0.211213	0.211137	0.215527	0.209925	0.207733	0.202827	0.217951	0.216917	0.214513	0.211994	0.218361	0.211726	0.220101	0.221951	0.213125	0.212908	0.216744	0.213625	0.213604	0.21402	0.213758	0.213814	0.213115	0.213718	0.213586	0.214176	0.212143	0.211571	0.212906	0.212142	0.211334	0.214261	0.212742	0.211479	0.21159	0.213982
3	AFF4_MOUSE|Q9ESC8_S482	0.212348	0.199338	0.219876	0.213645	0.213018	0.217747	0.217208	0.213615	0.207364	0.214344	0.21494	0.210939	0.214871	0.208758	0.213946	0.213845	0.215532	0.216509	0.216201	0.212472	0.21021	0.212807	0.215215	0.212186	0.218385	0.216099	0.213779	0.212967	0.212683	0.213521	0.215849	0.210871	0.210136	0.213233	0.209713	0.214602	0.211371	0.212265	0.213962	0.215526	0.209666	0.210022	0.212144	0.215943
3	AFF4_MOUSE|Q9ESC8_S831	0.209284	0.205263	0.214621	0.215233	0.216515	0.217103	0.215524	0.214281	0.214861	0.216797	0.214739	0.210182	0.210159	0.210517	0.212649	0.213764	0.213533	0.214296	0.212713	0.21314	0.211438	0.213413	0.215215	0.212186	0.218385	0.216099	0.213779	0.212967	0.212683	0.213521	0.215849	0.210871	0.210136	0.213233	0.209713	0.214602	0.211371	0.212265	0.213962	0.215526	0.209666	0.210022	0.212144	0.215943
3	AGAP1_MOUSE|Q8BXK8_S422	0.210204	0.21203	0.21089	0.217028	0.215604	0.214104	0.213984	0.215055	0.215777	0.215043	0.214795	0.207667	0.212797	0.213454	0.213508	0.213228	0.213729	0.209905	0.211294	0.213884	0.213231	0.212973	0.208755	0.215451	0.219521	0.212381	0.212446	0.216831	0.214748	0.211202	0.213209	0.218049	0.217661	0.214325	0.214937	0.212976	0.216926	0.209811	0.208376	0.207104	0.21314	0.215463	0.20777	0.208692
3	AGAP1_MOUSE|Q8BXK8_S605	0.206076	0.21301	0.210846	0.21197	0.21369	0.210205	0.212073	0.210938	0.213088	0.212919	0.21431	0.208806	0.210928	0.214764	0.215561	0.219655	0.215534	0.214763	0.21651	0.217797	0.211247	0.215263	0.208755	0.215451	0.219521	0.212381	0.212446	0.216831	0.214748	0.211202	0.213209	0.218049	0.217661	0.214325	0.214937	0.212976	0.216926	0.209811	0.208376	0.207104	0.21314	0.215463	0.20777	0.208692
3	AKA10_MOUSE|O88845_S187	0.210076	0.212251	0.211076	0.21582	0.215284	0.212096	0.213603	0.217205	0.218908	0.217109	0.215808	0.206976	0.211236	0.212957	0.211262	0.211488	0.211527	0.211437	0.212631	0.21422	0.213298	0.213784	0.21534	0.213864	0.216803	0.213366	0.215483	0.212739	0.212969	0.213796	0.214022	0.213532	0.212844	0.211948	0.214121	0.212547	0.211572	0.211633	0.212633	0.214045	0.210713	0.211822	0.211413	0.213107
3	AKP13_MOUSE|E9Q394_S1253	0.21344	0.212895	0.218131	0.215246	0.215463	0.217425	0.218753	0.215483	0.216353	0.214239	0.214933	0.207468	0.204368	0.207644	0.212373	0.21168	0.211393	0.213471	0.213167	0.212983	0.211733	0.211172	0.213043	0.213763	0.215616	0.210359	0.213302	0.21125	0.210839	0.212905	0.213233	0.211859	0.213683	0.213783	0.212955	0.212747	0.213115	0.21303	0.214462	0.212566	0.213292	0.214818	0.214983	0.214729
3	AKP13_MOUSE|E9Q394_S2527	0.201253	0.209153	0.20929	0.211937	0.215563	0.214553	0.210775	0.214796	0.215543	0.214941	0.2162	0.207488	0.207916	0.212212	0.213712	0.221731	0.215699	0.21482	0.216867	0.217266	0.213607	0.214193	0.213043	0.213763	0.215616	0.210359	0.213302	0.21125	0.210839	0.212905	0.213233	0.211859	0.213683	0.213783	0.212955	0.212747	0.213115	0.21303	0.214462	0.212566	0.213292	0.214818	0.214983	0.214729
3	ALDOA_MOUSE|P05064_T49	0.214321	0.203956	0.215543	0.214367	0.214225	0.209447	0.220033	0.212963	0.215988	0.211658	0.219139	0.209654	0.2095	0.212643	0.212597	0.211949	0.213052	0.217009	0.213099	0.213235	0.212237	0.213225	0.212944	0.210254	0.214745	0.213247	0.212848	0.213543	0.213964	0.212579	0.21259	0.213025	0.214482	0.213659	0.21457	0.214591	0.213238	0.213748	0.212554	0.213251	0.212296	0.213373	0.211096	0.213762
3	ALKB5_MOUSE|Q3TSG4_S362	0.209138	0.214098	0.204659	0.216676	0.217359	0.21535	0.214346	0.211657	0.214874	0.21306	0.213146	0.206553	0.20886	0.21304	0.216055	0.216497	0.216205	0.214401	0.215216	0.214152	0.211681	0.212851	0.212365	0.213806	0.208405	0.217275	0.208576	0.213571	0.210734	0.213385	0.211985	0.21546	0.208663	0.215282	0.215008	0.219505	0.213667	0.213749	0.215048	0.210978	0.211654	0.215367	0.210784	0.214757
3	ANC2_MOUSE|Q8BZQ7_S329	0.209405	0.229823	0.192084	0.218232	0.217105	0.215347	0.21454	0.215222	0.215392	0.214319	0.213762	0.207833	0.211463	0.21543	0.214204	0.212512	0.211707	0.202779	0.21713	0.215264	0.213562	0.211031	0.212149	0.217951	0.212478	0.215276	0.215276	0.213667	0.213734	0.213314	0.213799	0.212846	0.212527	0.21258	0.213158	0.214768	0.213421	0.211591	0.211229	0.212466	0.211849	0.213074	0.211225	0.211917
3	ANR44_MOUSE|B2RXR6_S983	0.211482	0.211888	0.210734	0.214641	0.217211	0.213915	0.213273	0.213867	0.218311	0.215369	0.214531	0.209589	0.208071	0.215308	0.213424	0.212943	0.215157	0.210795	0.211737	0.212457	0.211714	0.213714	0.21208	0.210599	0.211068	0.213003	0.212948	0.215015	0.213589	0.213397	0.213096	0.214435	0.213776	0.214354	0.21349	0.214828	0.213053	0.213973	0.212263	0.211609	0.213525	0.213469	0.212997	0.213787
3	ANS1A_MOUSE|P59672_S903	0.206065	0.209988	0.205535	0.215113	0.214719	0.211607	0.211928	0.213394	0.215089	0.213152	0.211037	0.208864	0.209618	0.210011	0.216615	0.215975	0.216925	0.216928	0.215103	0.216356	0.219127	0.21659	0.211522	0.209708	0.214269	0.212395	0.212386	0.212057	0.214069	0.212502	0.214646	0.212363	0.213456	0.215142	0.214177	0.215998	0.212619	0.212983	0.213427	0.212085	0.212242	0.214501	0.214017	0.213758
3	ANXA1_MOUSE|P10107_S37	0.209269	0.210607	0.213071	0.217193	0.219337	0.221892	0.219414	0.21294	0.212831	0.216075	0.216037	0.208558	0.210336	0.204486	0.212668	0.21947	0.213259	0.214087	0.211065	0.209672	0.205787	0.211358	0.214124	0.210824	0.217143	0.214708	0.215089	0.214702	0.216329	0.214116	0.215625	0.216343	0.217177	0.210998	0.21253	0.211933	0.210103	0.211228	0.20997	0.21025	0.212707	0.21153	0.21105	0.211652
3	ANXA1_MOUSE|P10107_Y207	0.210368	0.205802	0.210959	0.215949	0.210531	0.218134	0.216881	0.215883	0.2168	0.219245	0.221621	0.20835	0.209113	0.209957	0.213289	0.211804	0.20477	0.212999	0.212601	0.219114	0.211258	0.214022	0.214124	0.210824	0.217143	0.214708	0.215089	0.214702	0.216329	0.214116	0.215625	0.216343	0.217177	0.210998	0.21253	0.211933	0.210103	0.211228	0.20997	0.21025	0.212707	0.21153	0.21105	0.211652
3	APEX1_MOUSE|P28352_S18	0.213701	0.200205	0.21447	0.213019	0.213788	0.214018	0.218205	0.210936	0.216149	0.218022	0.217193	0.212239	0.215029	0.211324	0.212521	0.214149	0.217895	0.20445	0.210508	0.213017	0.214725	0.21399	0.213193	0.213716	0.216268	0.213628	0.215598	0.213862	0.212444	0.213118	0.214491	0.213218	0.211765	0.213404	0.213221	0.212474	0.210466	0.214297	0.213317	0.215173	0.209782	0.212431	0.21216	0.212277
3	AR6P6_MOUSE|Q8BH07_S80	0.209983	0.221361	0.215004	0.216047	0.220008	0.222404	0.216353	0.21247	0.215641	0.216941	0.212007	0.205905	0.204184	0.201027	0.214954	0.213711	0.213029	0.213915	0.215766	0.210438	0.209766	0.208121	0.214582	0.221849	0.216122	0.212712	0.211805	0.214257	0.208707	0.209094	0.210822	0.214405	0.211369	0.2133	0.213257	0.206624	0.213679	0.213495	0.212486	0.215128	0.214735	0.216066	0.212457	0.213008
3	ARAF_MOUSE|P04627_S198	0.215301	0.206556	0.207901	0.210541	0.209288	0.218801	0.216661	0.208425	0.21229	0.206336	0.207089	0.214502	0.218057	0.208825	0.215256	0.215952	0.221798	0.222284	0.214726	0.21539	0.212201	0.211119	0.212566	0.211728	0.21421	0.213319	0.213567	0.212308	0.212797	0.213324	0.215163	0.214085	0.212321	0.209848	0.214677	0.2146	0.213087	0.214517	0.213174	0.213037	0.211803	0.213533	0.214028	0.212651
3	ARHG6_MOUSE|Q8K4I3_S224	0.206999	0.211442	0.213865	0.214931	0.21616	0.21344	0.21428	0.214104	0.216151	0.214996	0.214142	0.209143	0.208772	0.215727	0.213245	0.214197	0.211179	0.212287	0.214698	0.21412	0.212511	0.213744	0.214634	0.213425	0.213166	0.213408	0.216064	0.21356	0.214708	0.213113	0.214913	0.213852	0.213652	0.21252	0.211767	0.213668	0.211738	0.212347	0.212116	0.214141	0.211855	0.212112	0.211494	0.212088
3	ARHG7_MOUSE|Q9ES28_S673	0.207245	0.21321	0.205869	0.214232	0.213282	0.210206	0.211171	0.214038	0.210777	0.211057	0.210849	0.210021	0.210121	0.216035	0.217559	0.217537	0.215241	0.216418	0.218772	0.213451	0.217942	0.214785	0.214047	0.212007	0.214801	0.214951	0.214106	0.214343	0.215349	0.212573	0.211435	0.212584	0.21177	0.214712	0.213875	0.214812	0.212641	0.215072	0.212833	0.213908	0.210503	0.210773	0.211494	0.211714
3	ARI1A_MOUSE|A2BH40_S1185	0.20855	0.210322	0.20667	0.214555	0.215479	0.217834	0.21483	0.212532	0.21711	0.211519	0.215002	0.206993	0.211156	0.205676	0.21492	0.21404	0.218534	0.217506	0.21789	0.213867	0.21053	0.214183	0.213122	0.212374	0.213729	0.214111	0.213849	0.212429	0.210932	0.214794	0.213761	0.211482	0.211261	0.212396	0.212254	0.214103	0.212833	0.211676	0.215083	0.213981	0.21324	0.21239	0.215769	0.21476
3	ARI1A_MOUSE|A2BH40_S365	0.210782	0.213894	0.206483	0.210504	0.223266	0.213982	0.211485	0.210333	0.213935	0.208219	0.211355	0.223182	0.213456	0.207873	0.215109	0.214331	0.219406	0.215693	0.203358	0.209825	0.213495	0.219223	0.213122	0.212374	0.213729	0.214111	0.213849	0.212429	0.210932	0.214794	0.213761	0.211482	0.211261	0.212396	0.212254	0.214103	0.212833	0.211676	0.215083	0.213981	0.21324	0.21239	0.215769	0.21476
3	ARI4B_MOUSE|A2CG63_S668	0.209151	0.210013	0.209017	0.215232	0.216915	0.215746	0.215502	0.215603	0.221246	0.215973	0.220149	0.204986	0.204325	0.20841	0.213774	0.212496	0.213442	0.213089	0.215678	0.21301	0.211451	0.214314	0.214122	0.214293	0.21304	0.215107	0.21394	0.210192	0.212091	0.21229	0.215211	0.215511	0.214785	0.21346	0.211925	0.214514	0.209254	0.211381	0.210889	0.211941	0.215855	0.212024	0.214339	0.214091
3	ASAP1_MOUSE|Q9QWY8_S854_S858	0.209451	0.209861	0.212914	0.212649	0.218827	0.214729	0.216401	0.211601	0.214497	0.213405	0.215805	0.211073	0.212041	0.208235	0.213781	0.213264	0.214035	0.214714	0.215231	0.212215	0.212125	0.213278	0.213626	0.211932	0.217501	0.214182	0.215406	0.21387	0.214187	0.214005	0.213875	0.213417	0.214913	0.211624	0.212208	0.213403	0.212042	0.211658	0.211926	0.211884	0.212026	0.211854	0.211966	0.2128
3	ASPC1_MOUSE|Q8VBT9_S230	0.217011	0.211512	0.215876	0.213612	0.219311	0.219226	0.218032	0.21173	0.214077	0.215011	0.213351	0.211457	0.205752	0.207547	0.215389	0.218634	0.217619	0.215461	0.205947	0.206727	0.208444	0.207692	0.212255	0.211303	0.21412	0.213905	0.213641	0.213686	0.213597	0.213397	0.212846	0.214283	0.213598	0.213923	0.214529	0.214939	0.213436	0.214325	0.212965	0.211168	0.210884	0.212241	0.212943	0.212372
3	ASPC1_MOUSE|Q8VBT9_S279	0.206451	0.207845	0.211231	0.212524	0.220266	0.216763	0.216005	0.2106	0.211164	0.211167	0.214101	0.207277	0.207313	0.210574	0.217289	0.223582	0.218869	0.217846	0.212915	0.213359	0.209522	0.212735	0.212255	0.211303	0.21412	0.213905	0.213641	0.213686	0.213597	0.213397	0.212846	0.214283	0.213598	0.213923	0.214529	0.214939	0.213436	0.214325	0.212965	0.211168	0.210884	0.212241	0.212943	0.212372
3	ASXL2_MOUSE|Q8BZ32_S143	0.215948	0.214365	0.209317	0.215476	0.216921	0.21833	0.217129	0.210167	0.209143	0.213882	0.2104	0.212553	0.21356	0.211041	0.216246	0.215049	0.214105	0.213163	0.211789	0.210282	0.21214	0.209019	0.214695	0.211917	0.214746	0.214012	0.211344	0.215653	0.216076	0.210906	0.211329	0.209839	0.212076	0.215865	0.216332	0.215361	0.212528	0.21433	0.2128	0.214207	0.21391	0.210645	0.21053	0.211105
3	ASXL2_MOUSE|Q8BZ32_S523	0.20609	0.208177	0.214633	0.208673	0.213095	0.218357	0.218478	0.204408	0.204614	0.21328	0.218046	0.213883	0.200518	0.206649	0.222173	0.227218	0.215704	0.215145	0.220504	0.215933	0.210267	0.212487	0.214695	0.211917	0.214746	0.214012	0.211344	0.215653	0.216076	0.210906	0.211329	0.209839	0.212076	0.215865	0.216332	0.215361	0.212528	0.21433	0.2128	0.214207	0.21391	0.210645	0.21053	0.211105
3	ASXL2_MOUSE|Q8BZ32_S524	0.211926	0.213728	0.210589	0.216872	0.219754	0.214393	0.213893	0.214252	0.213806	0.207866	0.212887	0.204247	0.209361	0.210295	0.214884	0.216511	0.218171	0.217775	0.213228	0.209431	0.21252	0.213383	0.214695	0.211917	0.214746	0.214012	0.211344	0.215653	0.216076	0.210906	0.211329	0.209839	0.212076	0.215865	0.216332	0.215361	0.212528	0.21433	0.2128	0.214207	0.21391	0.210645	0.21053	0.211105
3	ATF2_MOUSE|P16951_S94	0.210349	0.215278	0.206607	0.215928	0.215219	0.209169	0.211158	0.215226	0.213243	0.21026	0.213292	0.206465	0.208642	0.214321	0.215346	0.217735	0.219234	0.214747	0.216538	0.211232	0.216525	0.213297	0.215421	0.213684	0.219523	0.21567	0.212683	0.214725	0.212835	0.212754	0.214188	0.214067	0.213242	0.212729	0.211742	0.212117	0.212964	0.210174	0.212878	0.211229	0.209425	0.213463	0.211665	0.213029
3	ATG2B_MOUSE|Q80XK6_S1571	0.209746	0.212802	0.213871	0.216232	0.217322	0.215665	0.216104	0.212925	0.214322	0.216351	0.215821	0.208128	0.208297	0.21117	0.214443	0.216597	0.213151	0.214105	0.212149	0.212058	0.210304	0.20845	0.213223	0.213264	0.216714	0.214271	0.214582	0.21248	0.214535	0.21378	0.213746	0.213632	0.213358	0.211954	0.212551	0.215577	0.211931	0.210577	0.212369	0.212902	0.213532	0.212927	0.210676	0.211728
3	ATG2B_MOUSE|Q80XK6_S379	0.207053	0.210908	0.217482	0.21052	0.212388	0.213306	0.215535	0.210361	0.209958	0.214657	0.215477	0.214729	0.208418	0.215437	0.215211	0.218288	0.211377	0.213107	0.21695	0.216564	0.210057	0.212163	0.213223	0.213264	0.216714	0.214271	0.214582	0.21248	0.214535	0.21378	0.213746	0.213632	0.213358	0.211954	0.212551	0.215577	0.211931	0.210577	0.212369	0.212902	0.213532	0.212927	0.210676	0.211728
3	ATRX_MOUSE|Q61687_S1978	0.206898	0.210287	0.214797	0.214279	0.217825	0.211375	0.214833	0.216562	0.21884	0.211118	0.211279	0.208779	0.207874	0.214034	0.210806	0.209987	0.215878	0.213827	0.216679	0.21295	0.216749	0.214223	0.212473	0.212322	0.214594	0.213079	0.215114	0.211665	0.210935	0.213753	0.213412	0.212073	0.210636	0.213055	0.212533	0.213442	0.213054	0.212346	0.214665	0.215468	0.212743	0.212567	0.215546	0.214846
3	ATRX_MOUSE|Q61687_S1979	0.209678	0.21189	0.211402	0.213291	0.215023	0.21503	0.213745	0.214763	0.216214	0.220059	0.218878	0.211036	0.210301	0.209125	0.212181	0.212359	0.209038	0.210258	0.215552	0.214046	0.211875	0.214246	0.212473	0.212322	0.214594	0.213079	0.215114	0.211665	0.210935	0.213753	0.213412	0.212073	0.210636	0.213055	0.212533	0.213442	0.213054	0.212346	0.214665	0.215468	0.212743	0.212567	0.215546	0.214846
3	ATX2_MOUSE|O70305_S836	0.209485	0.208265	0.207018	0.214416	0.219451	0.215352	0.213938	0.211088	0.214332	0.208762	0.21126	0.209273	0.213292	0.209819	0.21433	0.217004	0.220449	0.218679	0.211744	0.213598	0.212956	0.21524	0.213046	0.210796	0.213927	0.213644	0.212656	0.214044	0.212005	0.214866	0.212285	0.210863	0.211302	0.21348	0.211857	0.212757	0.212269	0.214306	0.216839	0.214831	0.212636	0.213076	0.214382	0.214445
3	ATX2L_MOUSE|Q7TQH0_S422	0.213833	0.204114	0.202817	0.21262	0.208697	0.224002	0.223033	0.214226	0.2102	0.208488	0.211413	0.214048	0.216479	0.205631	0.218158	0.218223	0.225322	0.221447	0.217068	0.20736	0.20535	0.205634	0.2124	0.208813	0.212445	0.214931	0.212916	0.212833	0.211628	0.213607	0.212845	0.212785	0.212104	0.213575	0.212385	0.214201	0.213402	0.213602	0.215989	0.213915	0.212371	0.213088	0.216092	0.214376
3	ATX2L_MOUSE|Q7TQH0_S597	0.209049	0.204747	0.207527	0.213217	0.211502	0.211846	0.211853	0.21323	0.211006	0.212281	0.212974	0.211477	0.213319	0.213267	0.216183	0.216837	0.218289	0.215666	0.217445	0.214562	0.217517	0.216068	0.2124	0.208813	0.212445	0.214931	0.212916	0.212833	0.211628	0.213607	0.212845	0.212785	0.212104	0.213575	0.212385	0.214201	0.213402	0.213602	0.215989	0.213915	0.212371	0.213088	0.216092	0.214376
3	ATX2L_MOUSE|Q7TQH0_Y200	0.206144	0.209867	0.212582	0.217638	0.216198	0.215373	0.214842	0.214799	0.212089	0.217322	0.216448	0.205615	0.205049	0.212947	0.219051	0.216286	0.213756	0.212004	0.213788	0.214427	0.211261	0.212214	0.2124	0.208813	0.212445	0.214931	0.212916	0.212833	0.211628	0.213607	0.212845	0.212785	0.212104	0.213575	0.212385	0.214201	0.213402	0.213602	0.215989	0.213915	0.212371	0.213088	0.216092	0.214376
3	B2RQG2_MOUSE|B2RQG2_S1529	0.213893	0.213887	0.21347	0.210143	0.219913	0.217587	0.21365	0.207931	0.211345	0.207448	0.209729	0.212355	0.208259	0.208239	0.2155	0.221814	0.222874	0.219512	0.212447	0.208471	0.210271	0.210616	0.213806	0.217704	0.21744	0.211938	0.214512	0.214017	0.211037	0.213153	0.215126	0.211442	0.209984	0.212736	0.212695	0.211493	0.211812	0.212296	0.214032	0.215448	0.211847	0.212821	0.212319	0.21257
3	B2RT41_MOUSE|B2RT41_S356	0.207593	0.216185	0.209753	0.216376	0.218874	0.217762	0.213148	0.214922	0.213728	0.211677	0.208904	0.205203	0.206505	0.205778	0.215717	0.215837	0.218384	0.218517	0.214664	0.213726	0.213649	0.212636	0.213558	0.221895	0.218256	0.213927	0.213835	0.215394	0.210411	0.213179	0.211261	0.211135	0.209416	0.213604	0.211855	0.208322	0.212053	0.212805	0.21274	0.21478	0.211827	0.213905	0.213258	0.212603
3	B2RXC2_MOUSE|B2RXC2_T32	0.204334	0.210866	0.215112	0.209427	0.215033	0.21212	0.212188	0.216015	0.221378	0.215812	0.215447	0.20331	0.206035	0.213383	0.209647	0.217434	0.212143	0.210703	0.215674	0.221817	0.213586	0.217819	0.210595	0.205607	0.213134	0.210172	0.209173	0.208663	0.210358	0.219717	0.222385	0.218679	0.219928	0.209578	0.211244	0.210711	0.207748	0.210346	0.210744	0.209121	0.215968	0.216752	0.219192	0.219431
3	B9EJ80_MOUSE|B9EJ80_S968	0.21159	0.209059	0.206715	0.210741	0.215145	0.212065	0.211876	0.218194	0.215782	0.21418	0.216511	0.208607	0.20809	0.210754	0.211355	0.212728	0.21674	0.215033	0.218298	0.21509	0.216715	0.214598	0.213671	0.216535	0.215896	0.21204	0.211797	0.214454	0.211674	0.213629	0.213011	0.212244	0.211606	0.214037	0.213818	0.211333	0.211817	0.212342	0.213195	0.213713	0.21327	0.214691	0.21277	0.21278
3	B9EKS2_MOUSE|B9EKS2_S290	0.206262	0.212013	0.208331	0.215487	0.218949	0.218187	0.217354	0.212807	0.213517	0.215316	0.213798	0.20601	0.202665	0.212024	0.217694	0.219138	0.215306	0.213832	0.21417	0.215205	0.210419	0.210992	0.212938	0.210607	0.21806	0.21497	0.216769	0.215035	0.214363	0.213523	0.21523	0.216332	0.213219	0.213181	0.212311	0.214069	0.211733	0.209045	0.211806	0.213057	0.211911	0.210592	0.209204	0.212198
3	B9EKS2_MOUSE|B9EKS2_S292	0.208639	0.211012	0.203376	0.218656	0.222433	0.218849	0.217093	0.21489	0.220028	0.215537	0.212187	0.202494	0.206215	0.211861	0.213939	0.214566	0.21565	0.21413	0.212003	0.21215	0.212946	0.210533	0.212938	0.210607	0.21806	0.21497	0.216769	0.215035	0.214363	0.213523	0.21523	0.216332	0.213219	0.213181	0.212311	0.214069	0.211733	0.209045	0.211806	0.213057	0.211911	0.210592	0.209204	0.212198
3	B9EKS2_MOUSE|B9EKS2_S294	0.204484	0.214736	0.215011	0.216718	0.219467	0.211427	0.212239	0.214367	0.214946	0.213783	0.213726	0.202412	0.204568	0.214341	0.216095	0.218678	0.213281	0.212763	0.213403	0.214406	0.214693	0.213987	0.212938	0.210607	0.21806	0.21497	0.216769	0.215035	0.214363	0.213523	0.21523	0.216332	0.213219	0.213181	0.212311	0.214069	0.211733	0.209045	0.211806	0.213057	0.211911	0.210592	0.209204	0.212198
3	BAG6_MOUSE|Q9Z1R2_T1102	0.209945	0.20974	0.210742	0.214137	0.214253	0.21329	0.214374	0.214836	0.216498	0.215569	0.215446	0.207087	0.208397	0.212337	0.21437	0.213996	0.212773	0.211983	0.215616	0.214742	0.215153	0.214815	0.212952	0.210772	0.214504	0.213481	0.21312	0.21297	0.213003	0.213931	0.213385	0.212777	0.212557	0.212014	0.213378	0.215653	0.214477	0.212781	0.212728	0.213206	0.212893	0.212209	0.213749	0.213827
3	BAHD1_MOUSE|Q497V6_S8	0.206373	0.211838	0.212459	0.215762	0.21801	0.21308	0.215189	0.210736	0.213676	0.212565	0.211987	0.201699	0.202443	0.213301	0.21991	0.221423	0.220201	0.217568	0.214929	0.214607	0.211712	0.209684	0.214596	0.211523	0.217026	0.214015	0.212671	0.214411	0.213672	0.213071	0.213255	0.211255	0.213738	0.214859	0.212623	0.213681	0.213661	0.216054	0.213554	0.214855	0.209733	0.208375	0.212105	0.211497
3	BAZ2A_MOUSE|Q91YE5_S718	0.209024	0.212021	0.208617	0.211039	0.2178	0.220973	0.212543	0.215569	0.216142	0.212345	0.213296	0.209388	0.209628	0.203211	0.209793	0.219228	0.222818	0.216369	0.212237	0.215354	0.211799	0.2102	0.214215	0.217959	0.216308	0.210535	0.211082	0.210978	0.209912	0.210183	0.210017	0.208623	0.209026	0.212779	0.21461	0.211533	0.214516	0.21144	0.216373	0.214373	0.216593	0.218168	0.216409	0.214342
3	BCAR3_MOUSE|Q9QZK2_S378	0.20118	0.207238	0.210371	0.217702	0.216642	0.211612	0.212878	0.214767	0.216284	0.211243	0.214472	0.2023	0.206114	0.219667	0.215301	0.221177	0.218992	0.216352	0.214387	0.216547	0.211555	0.212278	0.21006	0.207747	0.212677	0.216596	0.212844	0.213577	0.214323	0.209713	0.21332	0.211077	0.213292	0.2128	0.215698	0.212319	0.214101	0.21393	0.216436	0.214398	0.213098	0.214447	0.214972	0.212767
3	BCAS3_MOUSE|Q8CCN5_S869	0.206273	0.209616	0.208525	0.213085	0.215126	0.211848	0.212306	0.212219	0.215553	0.217417	0.215266	0.210878	0.211	0.211845	0.21621	0.213257	0.212615	0.213229	0.216405	0.216239	0.215983	0.215122	0.215817	0.214154	0.215237	0.213904	0.213367	0.213852	0.215584	0.213235	0.216487	0.214598	0.215373	0.211189	0.212801	0.213951	0.212501	0.211546	0.2125	0.21044	0.210029	0.213022	0.210815	0.209829
3	BCAS3_MOUSE|Q8CCN5_S871	0.207127	0.209113	0.209419	0.214958	0.216058	0.210285	0.213118	0.216524	0.217719	0.21562	0.215214	0.209098	0.212298	0.214562	0.213139	0.211043	0.21291	0.212501	0.213632	0.214857	0.21508	0.21575	0.215817	0.214154	0.215237	0.213904	0.213367	0.213852	0.215584	0.213235	0.216487	0.214598	0.215373	0.211189	0.212801	0.213951	0.212501	0.211546	0.2125	0.21044	0.210029	0.213022	0.210815	0.209829
3	BCL7A_MOUSE|Q9CXE2_S114	0.209346	0.206377	0.216765	0.214413	0.214481	0.218153	0.213402	0.218022	0.218111	0.217061	0.218023	0.214285	0.203184	0.211506	0.210555	0.215059	0.211461	0.211722	0.212708	0.207859	0.213985	0.21315	0.216388	0.208976	0.220249	0.214889	0.211346	0.220306	0.214649	0.215137	0.209526	0.21383	0.214732	0.210321	0.210611	0.210641	0.211781	0.213151	0.213385	0.211213	0.213143	0.213866	0.211171	0.210645
3	BCLF1_MOUSE|Q8K019_S267	0.208559	0.210131	0.209891	0.208685	0.225978	0.214335	0.213031	0.208248	0.215663	0.211393	0.213955	0.225231	0.214013	0.207974	0.213136	0.215607	0.211631	0.217747	0.200568	0.210801	0.213063	0.219217	0.211556	0.210162	0.214001	0.214092	0.2158	0.213464	0.213122	0.213955	0.21405	0.213717	0.212428	0.213124	0.21263	0.212851	0.212912	0.212755	0.213749	0.215137	0.21085	0.212759	0.213392	0.21383
3	BCLF1_MOUSE|Q8K019_S284	0.203556	0.210304	0.205681	0.213268	0.217824	0.217272	0.213061	0.210369	0.20906	0.209504	0.212974	0.21472	0.215476	0.210476	0.219116	0.217595	0.217208	0.215994	0.215167	0.213563	0.213253	0.214193	0.211556	0.210162	0.214001	0.214092	0.2158	0.213464	0.213122	0.213955	0.21405	0.213717	0.212428	0.213124	0.21263	0.212851	0.212912	0.212755	0.213749	0.215137	0.21085	0.212759	0.213392	0.21383
3	BD1L1_MOUSE|E9Q6J5_S1071	0.209793	0.215949	0.212563	0.219339	0.21318	0.215295	0.213796	0.216024	0.207573	0.211109	0.210853	0.207275	0.210205	0.213752	0.216066	0.219558	0.216099	0.214244	0.20628	0.218387	0.211443	0.210937	0.214562	0.215513	0.217113	0.213491	0.215028	0.213407	0.21064	0.213172	0.213905	0.210663	0.210032	0.213916	0.212056	0.213004	0.21365	0.211197	0.215312	0.214607	0.210621	0.210994	0.213761	0.213599
3	BD1L1_MOUSE|E9Q6J5_S240	0.204042	0.214085	0.209754	0.21256	0.213383	0.214362	0.208793	0.219168	0.217459	0.216068	0.213855	0.206062	0.207974	0.213161	0.213638	0.214776	0.212647	0.210112	0.218132	0.216731	0.218152	0.214717	0.214562	0.215513	0.217113	0.213491	0.215028	0.213407	0.21064	0.213172	0.213905	0.210663	0.210032	0.213916	0.212056	0.213004	0.21365	0.211197	0.215312	0.214607	0.210621	0.210994	0.213761	0.213599
3	BD1L1_MOUSE|E9Q6J5_S2888	0.20861	0.206079	0.208392	0.214865	0.220451	0.214056	0.212901	0.212529	0.214749	0.210467	0.211524	0.206635	0.207745	0.212438	0.21615	0.220776	0.222529	0.220619	0.211347	0.210493	0.21327	0.212723	0.214562	0.215513	0.217113	0.213491	0.215028	0.213407	0.21064	0.213172	0.213905	0.210663	0.210032	0.213916	0.212056	0.213004	0.21365	0.211197	0.215312	0.214607	0.210621	0.210994	0.213761	0.213599
3	BD1L1_MOUSE|E9Q6J5_S634	0.204598	0.215144	0.2115	0.217779	0.223033	0.217349	0.213852	0.215011	0.218392	0.210887	0.211507	0.203217	0.206618	0.207225	0.214198	0.217116	0.216023	0.218606	0.208096	0.214095	0.210441	0.214502	0.214562	0.215513	0.217113	0.213491	0.215028	0.213407	0.21064	0.213172	0.213905	0.210663	0.210032	0.213916	0.212056	0.213004	0.21365	0.211197	0.215312	0.214607	0.210621	0.210994	0.213761	0.213599
3	BD1L1_MOUSE|E9Q6J5_T1072	0.211827	0.215452	0.215628	0.217568	0.209371	0.215254	0.215232	0.215913	0.209959	0.211257	0.212738	0.209268	0.210965	0.2138	0.21393	0.217213	0.213888	0.213448	0.210803	0.215886	0.209078	0.211591	0.214562	0.215513	0.217113	0.213491	0.215028	0.213407	0.21064	0.213172	0.213905	0.210663	0.210032	0.213916	0.212056	0.213004	0.21365	0.211197	0.215312	0.214607	0.210621	0.210994	0.213761	0.213599
3	BIN2_MOUSE|D3Z6Q9_S430	0.212581	0.208135	0.208144	0.212173	0.213854	0.21371	0.214778	0.213009	0.211465	0.215326	0.215113	0.210897	0.212469	0.212856	0.21558	0.214814	0.21362	0.211433	0.215739	0.214672	0.215006	0.214808	0.213931	0.210794	0.216088	0.21307	0.215791	0.212355	0.215532	0.210398	0.214966	0.2129	0.21437	0.213434	0.211969	0.216102	0.212241	0.21376	0.212553	0.213207	0.212316	0.2112	0.211904	0.21139
3	BIN2_MOUSE|D3Z6Q9_S439	0.216784	0.210439	0.208613	0.214402	0.21894	0.216604	0.216851	0.20864	0.206628	0.212462	0.212513	0.211215	0.209674	0.213007	0.217543	0.218766	0.216554	0.213811	0.213789	0.209045	0.21128	0.212231	0.213931	0.210794	0.216088	0.21307	0.215791	0.212355	0.215532	0.210398	0.214966	0.2129	0.21437	0.213434	0.211969	0.216102	0.212241	0.21376	0.212553	0.213207	0.212316	0.2112	0.211904	0.21139
3	BIRC6_MOUSE|O88738_S584	0.197823	0.2156	0.210377	0.213495	0.227116	0.212981	0.211968	0.210615	0.215184	0.212731	0.212273	0.208485	0.20263	0.209551	0.219588	0.223542	0.21423	0.216831	0.20693	0.21495	0.21343	0.218133	0.21354	0.21661	0.210785	0.213894	0.213519	0.213503	0.21214	0.213724	0.212788	0.21328	0.211867	0.213634	0.213429	0.213295	0.213723	0.212678	0.21347	0.212705	0.212505	0.213068	0.213098	0.213106
3	BORC5_MOUSE|Q9D920_T77	0.212004	0.209088	0.210689	0.215735	0.21756	0.214651	0.214514	0.215179	0.216043	0.217029	0.217613	0.207642	0.202642	0.211861	0.212947	0.214451	0.216385	0.209111	0.21315	0.213506	0.212794	0.21517	0.213013	0.20889	0.215248	0.212681	0.211449	0.212201	0.212777	0.212483	0.21339	0.212624	0.213395	0.216722	0.211417	0.213836	0.212883	0.215751	0.214827	0.213656	0.211195	0.212228	0.213361	0.216229
3	BRAP_MOUSE|Q99MP8_S116	0.207942	0.211832	0.213233	0.211671	0.215532	0.21452	0.215842	0.211419	0.214269	0.215148	0.214099	0.212048	0.206095	0.215018	0.215887	0.218774	0.213102	0.211867	0.212727	0.215089	0.212505	0.211427	0.214167	0.212805	0.214282	0.214778	0.214966	0.212071	0.212969	0.21171	0.212617	0.21173	0.211344	0.213885	0.213586	0.218776	0.212378	0.213864	0.212125	0.212545	0.211603	0.211237	0.212225	0.214613
3	BRE1A_MOUSE|Q5DTM8_S138	0.203829	0.204864	0.213137	0.216229	0.219724	0.217989	0.219539	0.214754	0.214654	0.215899	0.21686	0.205669	0.207509	0.207577	0.215841	0.219551	0.213711	0.212248	0.212299	0.211781	0.211762	0.213883	0.213904	0.212158	0.21701	0.215637	0.214845	0.214291	0.215192	0.212391	0.214535	0.214152	0.214729	0.212297	0.209459	0.213921	0.212754	0.212774	0.211474	0.212006	0.211351	0.211407	0.211486	0.212487
3	BRE1A_MOUSE|Q5DTM8_T526	0.212309	0.211838	0.20517	0.215053	0.216549	0.2194	0.217144	0.211881	0.214746	0.210925	0.211302	0.208992	0.207566	0.208651	0.214951	0.213615	0.215119	0.218443	0.216022	0.214414	0.212579	0.213129	0.213904	0.212158	0.21701	0.215637	0.214845	0.214291	0.215192	0.212391	0.214535	0.214152	0.214729	0.212297	0.209459	0.213921	0.212754	0.212774	0.211474	0.212006	0.211351	0.211407	0.211486	0.212487
3	BRE1B_MOUSE|Q3U319_T593	0.212387	0.213354	0.211423	0.211928	0.217037	0.215474	0.216106	0.211327	0.211913	0.210768	0.213628	0.215602	0.213553	0.205779	0.212493	0.217521	0.212104	0.216801	0.211986	0.210349	0.2145	0.214028	0.214688	0.212532	0.216075	0.215336	0.215819	0.214516	0.214414	0.21444	0.214344	0.213713	0.214385	0.211094	0.211625	0.213402	0.211852	0.211362	0.212242	0.212081	0.211448	0.210909	0.211524	0.212483
3	BRPF1_MOUSE|B2RRD7_S924	0.210848	0.213853	0.2107	0.2139	0.214852	0.213301	0.213225	0.213217	0.212301	0.212423	0.213689	0.211351	0.214682	0.212726	0.213913	0.21479	0.213897	0.213362	0.215338	0.211965	0.211581	0.214418	0.214512	0.213946	0.215112	0.214352	0.214206	0.214225	0.213241	0.212874	0.212657	0.214006	0.212218	0.213341	0.212448	0.212551	0.213393	0.21256	0.212123	0.213799	0.210963	0.212547	0.212654	0.212641
3	BSDC1_MOUSE|Q80Y55_S384	0.21025	0.202971	0.216474	0.210131	0.212767	0.217668	0.212808	0.210331	0.210375	0.215666	0.210031	0.210948	0.211593	0.217319	0.21752	0.220052	0.214802	0.215977	0.213753	0.214695	0.20982	0.21376	0.213673	0.204251	0.219485	0.212446	0.208681	0.214761	0.209011	0.215139	0.213563	0.214432	0.20825	0.212566	0.212571	0.221053	0.211323	0.217435	0.212804	0.215849	0.209646	0.214339	0.211289	0.21711
3	BSDC1_MOUSE|Q80Y55_S385	0.211559	0.202749	0.213215	0.210567	0.213115	0.215855	0.211219	0.209517	0.210218	0.21342	0.209019	0.212395	0.210185	0.217525	0.218364	0.219334	0.216112	0.218551	0.213861	0.214211	0.212209	0.216482	0.213673	0.204251	0.219485	0.212446	0.208681	0.214761	0.209011	0.215139	0.213563	0.214432	0.20825	0.212566	0.212571	0.221053	0.211323	0.217435	0.212804	0.215849	0.209646	0.214339	0.211289	0.21711
3	BTK_MOUSE|P35991_Y134	0.21034	0.211189	0.208014	0.213767	0.213636	0.216488	0.214909	0.21412	0.217052	0.21975	0.218916	0.2103	0.210156	0.212017	0.214589	0.21346	0.210568	0.209366	0.213273	0.21535	0.21023	0.212453	0.213302	0.214778	0.214338	0.212507	0.214239	0.211809	0.213511	0.212478	0.213377	0.212609	0.21273	0.21408	0.214171	0.214377	0.212381	0.213419	0.213205	0.213009	0.213204	0.211948	0.211856	0.213052
3	C170B_MOUSE|Q80U49_S1533	0.210807	0.208546	0.207111	0.213895	0.217504	0.218756	0.216229	0.210662	0.216286	0.210198	0.215839	0.20606	0.208483	0.209933	0.212618	0.219164	0.218416	0.217971	0.216719	0.213264	0.207649	0.213443	0.213888	0.211473	0.216171	0.212929	0.21362	0.213492	0.21349	0.211732	0.213699	0.211445	0.213213	0.214471	0.21332	0.216852	0.21246	0.214202	0.213006	0.212628	0.210182	0.213227	0.212241	0.212567
3	C1QR1_MOUSE|O89103_S619	0.213114	0.211469	0.207607	0.213544	0.216727	0.216825	0.214284	0.209313	0.212448	0.211947	0.210675	0.212601	0.214566	0.212009	0.213445	0.216195	0.216503	0.214457	0.213295	0.213307	0.213875	0.211945	0.212909	0.216232	0.212792	0.21132	0.212416	0.2146	0.207129	0.210734	0.212968	0.2105	0.207035	0.21726	0.215314	0.218236	0.212622	0.212765	0.214036	0.214235	0.214147	0.21383	0.214289	0.214679
3	C2D1B_MOUSE|Q8BRN9_S455	0.207804	0.205401	0.210682	0.214494	0.217671	0.215767	0.220187	0.207503	0.206933	0.207398	0.209948	0.210772	0.208734	0.214319	0.220575	0.220389	0.220348	0.217978	0.216938	0.211815	0.212352	0.211198	0.2141	0.211552	0.216118	0.214538	0.215513	0.213808	0.213953	0.213479	0.21668	0.214264	0.213454	0.211113	0.212391	0.214302	0.211304	0.211774	0.212263	0.212897	0.210482	0.211905	0.212217	0.212176
3	C5AR1_MOUSE|P30993_S344	0.201693	0.215049	0.215479	0.212555	0.209576	0.216094	0.208177	0.216271	0.211529	0.219031	0.213848	0.211922	0.206217	0.210975	0.21901	0.212272	0.209081	0.212881	0.223194	0.215808	0.21377	0.214925	0.214586	0.217212	0.212831	0.216865	0.21376	0.21625	0.213836	0.217514	0.210253	0.214202	0.213217	0.213987	0.211372	0.21086	0.209279	0.214245	0.211985	0.213164	0.209951	0.212529	0.211151	0.211093
3	CA174_MOUSE|Q80WR5_S20	0.206993	0.212125	0.213928	0.214951	0.216852	0.218094	0.216743	0.211931	0.210142	0.211695	0.212118	0.207674	0.202599	0.20611	0.21604	0.225051	0.217929	0.219886	0.212	0.214687	0.210846	0.210775	0.216444	0.216365	0.216074	0.213251	0.21327	0.213777	0.212011	0.21272	0.212916	0.213609	0.211245	0.214464	0.211975	0.213942	0.213302	0.212173	0.21393	0.211499	0.210912	0.21167	0.211929	0.212815
3	CA174_MOUSE|Q80WR5_S22	0.2029	0.218831	0.214349	0.217474	0.22173	0.218351	0.215508	0.213816	0.213464	0.211784	0.211998	0.202642	0.20251	0.217187	0.215988	0.222055	0.215321	0.211467	0.210936	0.214984	0.206331	0.209212	0.216444	0.216365	0.216074	0.213251	0.21327	0.213777	0.212011	0.21272	0.212916	0.213609	0.211245	0.214464	0.211975	0.213942	0.213302	0.212173	0.21393	0.211499	0.210912	0.21167	0.211929	0.212815
3	CAMP1_MOUSE|A2AHC3_S1069	0.207018	0.216758	0.211967	0.214236	0.215315	0.2143	0.208036	0.2106	0.210899	0.211081	0.210953	0.211686	0.211151	0.213943	0.215595	0.218428	0.216486	0.217445	0.214071	0.215583	0.211296	0.213132	0.212649	0.214828	0.216907	0.214321	0.214147	0.213041	0.211369	0.211374	0.211235	0.210794	0.209952	0.214107	0.21258	0.214392	0.214703	0.212988	0.2141	0.214087	0.210919	0.213953	0.214244	0.213587
3	CAMP2_MOUSE|Q8C1B1_S439	0.202679	0.210679	0.208959	0.214441	0.216915	0.217602	0.214589	0.212781	0.214419	0.211238	0.212738	0.204891	0.206057	0.211117	0.215802	0.2207	0.216772	0.215944	0.216254	0.218325	0.213221	0.213306	0.21248	0.214384	0.21788	0.21542	0.210719	0.212555	0.209779	0.209245	0.209894	0.212137	0.209453	0.216518	0.213038	0.216632	0.213936	0.21058	0.213873	0.213228	0.215833	0.214971	0.213671	0.213885
3	CAMP2_MOUSE|Q8C1B1_S836	0.199667	0.215515	0.211613	0.215699	0.214696	0.211368	0.21304	0.213224	0.212557	0.211096	0.212214	0.199575	0.205253	0.216167	0.21969	0.222454	0.216919	0.213788	0.220019	0.218378	0.215633	0.210218	0.21248	0.214384	0.21788	0.21542	0.210719	0.212555	0.209779	0.209245	0.209894	0.212137	0.209453	0.216518	0.213038	0.216632	0.213936	0.21058	0.213873	0.213228	0.215833	0.214971	0.213671	0.213885
3	CAPZB_MOUSE|P47757_S263	0.202734	0.208125	0.21033	0.215362	0.217046	0.220686	0.217349	0.21476	0.214528	0.219101	0.21697	0.205805	0.206545	0.211714	0.215102	0.21788	0.214409	0.211531	0.215985	0.216989	0.207362	0.208943	0.213949	0.210418	0.215736	0.213886	0.213619	0.213404	0.214441	0.213394	0.21299	0.214037	0.21285	0.212919	0.213274	0.214408	0.213529	0.212586	0.212376	0.21295	0.211614	0.212188	0.212641	0.213149
3	CAR11_MOUSE|Q8CIS0_S466	0.212598	0.206176	0.207244	0.214082	0.215271	0.216187	0.217248	0.211074	0.215335	0.213611	0.215742	0.210524	0.211639	0.208402	0.214338	0.214238	0.217164	0.213784	0.214028	0.214046	0.216127	0.211095	0.215005	0.213697	0.216148	0.213774	0.216461	0.212617	0.214256	0.213865	0.219378	0.212998	0.213976	0.212104	0.213972	0.21621	0.208346	0.211269	0.212399	0.208873	0.207694	0.212068	0.213379	0.211561
3	CAR11_MOUSE|Q8CIS0_S546	0.208573	0.206504	0.204259	0.216213	0.223673	0.220401	0.217686	0.21388	0.216463	0.214138	0.213657	0.206777	0.20996	0.210057	0.210165	0.220862	0.220522	0.213055	0.209982	0.210838	0.213209	0.208197	0.215005	0.213697	0.216148	0.213774	0.216461	0.212617	0.214256	0.213865	0.219378	0.212998	0.213976	0.212104	0.213972	0.21621	0.208346	0.211269	0.212399	0.208873	0.207694	0.212068	0.213379	0.211561
3	CASP8_MOUSE|O89110_S188	0.209326	0.202075	0.208451	0.215521	0.218722	0.21541	0.219183	0.211524	0.213379	0.211765	0.213691	0.205393	0.2124	0.21456	0.216293	0.215991	0.217404	0.21637	0.213048	0.215165	0.211911	0.211993	0.211323	0.211092	0.213538	0.211104	0.21353	0.21326	0.212291	0.211761	0.212598	0.212805	0.211965	0.213808	0.214852	0.216904	0.214684	0.21417	0.213978	0.211877	0.21366	0.214324	0.212615	0.214175
3	CBL_MOUSE|P22682_S617	0.208668	0.212104	0.211696	0.214312	0.217337	0.216076	0.215183	0.213085	0.21558	0.213253	0.213984	0.211827	0.212814	0.211046	0.212476	0.218507	0.214696	0.214583	0.210362	0.210648	0.209589	0.212288	0.213157	0.209032	0.215447	0.210953	0.213907	0.211724	0.21351	0.211822	0.214539	0.21365	0.211875	0.21475	0.212682	0.21387	0.213477	0.213277	0.214927	0.214167	0.212656	0.212553	0.214345	0.213991
3	CBP_MOUSE|P45481_S120	0.21272	0.209858	0.211868	0.213812	0.211557	0.210604	0.213544	0.212681	0.207197	0.212997	0.213083	0.211414	0.208081	0.211485	0.218574	0.21482	0.216628	0.21423	0.217694	0.214554	0.217161	0.215434	0.214348	0.214159	0.214731	0.213749	0.212737	0.21316	0.21191	0.213403	0.213378	0.212551	0.212522	0.213733	0.212981	0.211327	0.212535	0.213568	0.215062	0.212443	0.211118	0.212756	0.214436	0.213754
3	CBX5_MOUSE|Q61686_S92	0.207481	0.212682	0.213052	0.218867	0.223933	0.212665	0.214663	0.214536	0.216093	0.207028	0.21122	0.203099	0.202859	0.210758	0.214176	0.219467	0.222933	0.217851	0.209683	0.209173	0.213653	0.213055	0.215605	0.212741	0.218797	0.216118	0.215311	0.213784	0.212719	0.216356	0.213938	0.214809	0.213969	0.212692	0.210728	0.213859	0.210195	0.211345	0.212537	0.210893	0.209249	0.209496	0.212501	0.212491
3	CBX5_MOUSE|Q61686_S95	0.20545	0.20555	0.210957	0.215003	0.217804	0.212268	0.214218	0.213638	0.212709	0.220736	0.222207	0.208033	0.207985	0.207418	0.215557	0.218512	0.210837	0.208791	0.214077	0.214411	0.215319	0.217848	0.215605	0.212741	0.218797	0.216118	0.215311	0.213784	0.212719	0.216356	0.213938	0.214809	0.213969	0.212692	0.210728	0.213859	0.210195	0.211345	0.212537	0.210893	0.209249	0.209496	0.212501	0.212491
3	CCDC6_MOUSE|D3YZP9_S233_S237	0.209922	0.2095	0.209381	0.213745	0.216121	0.215365	0.216274	0.210864	0.212771	0.212862	0.213216	0.212531	0.212048	0.214308	0.215178	0.216234	0.214489	0.214557	0.21287	0.21415	0.211075	0.212738	0.214024	0.209957	0.213893	0.211679	0.212479	0.212189	0.213227	0.212344	0.21326	0.212708	0.211927	0.21383	0.214309	0.216848	0.213457	0.214985	0.213457	0.214206	0.212573	0.212432	0.213589	0.212953
3	CCDC6_MOUSE|D3YZP9_S237	0.209296	0.209586	0.211745	0.213505	0.215028	0.213133	0.21435	0.209796	0.214029	0.211642	0.212768	0.210078	0.209035	0.215657	0.217926	0.218043	0.215484	0.215981	0.213023	0.213928	0.212551	0.213498	0.214024	0.209957	0.213893	0.211679	0.212479	0.212189	0.213227	0.212344	0.21326	0.212708	0.211927	0.21383	0.214309	0.216848	0.213457	0.214985	0.213457	0.214206	0.212573	0.212432	0.213589	0.212953
3	CCM2_MOUSE|Q8K2Y9_S164	0.207254	0.211098	0.208097	0.21371	0.217306	0.215309	0.213388	0.213393	0.211956	0.212819	0.211404	0.208171	0.208753	0.21615	0.215334	0.220049	0.216011	0.212336	0.215231	0.214131	0.213875	0.214145	0.214496	0.215146	0.21242	0.215449	0.214596	0.211702	0.21193	0.21409	0.214639	0.212104	0.211023	0.213678	0.214238	0.218861	0.210726	0.213546	0.212933	0.213143	0.208694	0.211861	0.212694	0.212239
3	CCNL1_MOUSE|Q52KE7_S344	0.209083	0.211524	0.213396	0.217142	0.213598	0.215102	0.214844	0.212842	0.212448	0.210395	0.212997	0.210201	0.214484	0.207396	0.214501	0.215054	0.213937	0.21725	0.213673	0.212587	0.213861	0.213823	0.213102	0.219022	0.185455	0.215276	0.214234	0.212553	0.217253	0.214117	0.215643	0.215005	0.215241	0.212734	0.21405	0.218386	0.213889	0.214092	0.207104	0.209602	0.214408	0.216857	0.214885	0.2153
3	CD11B_MOUSE|P24788_S47	0.208155	0.215306	0.205357	0.216144	0.213411	0.211064	0.210242	0.212556	0.208985	0.212153	0.210955	0.21387	0.212078	0.21678	0.217381	0.217609	0.215486	0.215321	0.214602	0.213538	0.214696	0.214249	0.213993	0.212648	0.214876	0.214505	0.213065	0.212905	0.21334	0.212211	0.213218	0.212424	0.212491	0.213579	0.212026	0.215514	0.214434	0.211894	0.21278	0.212703	0.21243	0.212406	0.213107	0.213822
3	CD2AP_MOUSE|Q9JLQ0_S404	0.211727	0.208789	0.21258	0.216237	0.218516	0.217536	0.214178	0.215741	0.213356	0.216094	0.2137	0.210052	0.211165	0.211013	0.212407	0.216375	0.215678	0.214547	0.211111	0.207601	0.211682	0.209906	0.212757	0.20828	0.215641	0.213927	0.214041	0.214258	0.212675	0.212095	0.212472	0.213972	0.212792	0.213897	0.213269	0.214695	0.213159	0.213896	0.213665	0.213489	0.211907	0.212554	0.21293	0.213947
3	CD2AP_MOUSE|Q9JLQ0_S510	0.208783	0.209841	0.210243	0.216696	0.218601	0.216432	0.215326	0.21429	0.211495	0.214454	0.213185	0.20832	0.207825	0.210021	0.215817	0.217868	0.216012	0.215892	0.212726	0.211327	0.212384	0.212376	0.212757	0.20828	0.215641	0.213927	0.214041	0.214258	0.212675	0.212095	0.212472	0.213972	0.212792	0.213897	0.213269	0.214695	0.213159	0.213896	0.213665	0.213489	0.211907	0.212554	0.21293	0.213947
3	CD44_MOUSE|P15379_S733	0.207761	0.205412	0.207112	0.214751	0.214675	0.214687	0.215363	0.208612	0.207029	0.209163	0.209538	0.21408	0.21384	0.21776	0.219183	0.221124	0.218828	0.218629	0.213842	0.213192	0.21267	0.212202	0.211084	0.213299	0.219006	0.211985	0.213555	0.213247	0.21328	0.215144	0.213746	0.215337	0.214179	0.212017	0.21323	0.211371	0.211568	0.211534	0.209159	0.213267	0.214364	0.214001	0.212345	0.213514
3	CD44_MOUSE|P15379_S771	0.210359	0.209777	0.211967	0.214727	0.215107	0.223297	0.219903	0.20958	0.208827	0.215023	0.213983	0.212658	0.212445	0.208777	0.215894	0.218691	0.212786	0.212151	0.213465	0.213318	0.20677	0.210159	0.211084	0.213299	0.219006	0.211985	0.213555	0.213247	0.21328	0.215144	0.213746	0.215337	0.214179	0.212017	0.21323	0.211371	0.211568	0.211534	0.209159	0.213267	0.214364	0.214001	0.212345	0.213514
3	CD44_MOUSE|P15379_T756	0.211748	0.206801	0.20827	0.212184	0.21943	0.220699	0.217468	0.213016	0.213368	0.215728	0.212603	0.209832	0.211081	0.207227	0.214434	0.214371	0.214328	0.214893	0.215683	0.211165	0.212858	0.212627	0.211084	0.213299	0.219006	0.211985	0.213555	0.213247	0.21328	0.215144	0.213746	0.215337	0.214179	0.212017	0.21323	0.211371	0.211568	0.211534	0.209159	0.213267	0.214364	0.214001	0.212345	0.213514
3	CDC23_MOUSE|Q8BGZ4_T596	0.210988	0.212766	0.209289	0.216761	0.218054	0.220657	0.22072	0.211033	0.210059	0.212725	0.211127	0.207607	0.208925	0.207517	0.217958	0.219211	0.219567	0.218446	0.212037	0.211799	0.205377	0.206607	0.214329	0.214032	0.213929	0.215319	0.215162	0.215693	0.214721	0.213311	0.214675	0.214955	0.213901	0.211844	0.212646	0.21168	0.211983	0.211192	0.21083	0.212921	0.213033	0.211014	0.211773	0.211355
3	CDK14_MOUSE|O35495_S120_S123	0.207702	0.217014	0.21432	0.214487	0.214659	0.214387	0.21372	0.215236	0.213118	0.212072	0.212617	0.209449	0.209748	0.211462	0.213177	0.215842	0.21345	0.214944	0.212168	0.217198	0.212222	0.211147	0.213899	0.216254	0.215241	0.215735	0.213745	0.214401	0.214933	0.214214	0.212176	0.2131	0.214369	0.212119	0.212592	0.212675	0.212997	0.213047	0.210604	0.212498	0.211868	0.211428	0.210077	0.212318
3	CDK14_MOUSE|O35495_S24	0.207328	0.218587	0.214261	0.216241	0.218103	0.214979	0.214014	0.216584	0.219366	0.211477	0.21215	0.206411	0.208474	0.216033	0.211505	0.211733	0.212063	0.21369	0.213982	0.212285	0.209687	0.210858	0.213899	0.216254	0.215241	0.215735	0.213745	0.214401	0.214933	0.214214	0.212176	0.2131	0.214369	0.212119	0.212592	0.212675	0.212997	0.213047	0.210604	0.212498	0.211868	0.211428	0.210077	0.212318
3	CDK14_MOUSE|O35495_S95	0.20982	0.211913	0.205684	0.216587	0.216584	0.218748	0.216772	0.216877	0.212149	0.218284	0.216965	0.207858	0.208505	0.207975	0.213626	0.218088	0.213066	0.211403	0.213905	0.212263	0.211108	0.211522	0.213899	0.216254	0.215241	0.215735	0.213745	0.214401	0.214933	0.214214	0.212176	0.2131	0.214369	0.212119	0.212592	0.212675	0.212997	0.213047	0.210604	0.212498	0.211868	0.211428	0.210077	0.212318
3	CDK17_MOUSE|Q8K0D0_S137	0.20915	0.210589	0.20984	0.215105	0.215827	0.217155	0.214569	0.214449	0.214222	0.215023	0.212798	0.207782	0.207338	0.212968	0.21393	0.217235	0.215696	0.214086	0.214641	0.214085	0.212554	0.210988	0.215225	0.214173	0.217659	0.214316	0.213751	0.21436	0.214518	0.212871	0.21173	0.211956	0.212174	0.212529	0.213258	0.213178	0.212063	0.213089	0.211968	0.213251	0.21173	0.212393	0.211384	0.212736
3	CDK17_MOUSE|Q8K0D0_S165	0.205703	0.209469	0.207352	0.216998	0.217226	0.214985	0.21694	0.214578	0.216368	0.215686	0.214331	0.204471	0.207956	0.210603	0.214434	0.216127	0.214202	0.215286	0.215766	0.215517	0.211797	0.213889	0.215225	0.214173	0.217659	0.214316	0.213751	0.21436	0.214518	0.212871	0.21173	0.211956	0.212174	0.212529	0.213258	0.213178	0.212063	0.213089	0.211968	0.213251	0.21173	0.212393	0.211384	0.212736
3	CE030_MOUSE|Q8VEB3_S132	0.206176	0.209584	0.209503	0.219688	0.213905	0.217716	0.215835	0.218383	0.20951	0.217915	0.21661	0.206125	0.205679	0.206928	0.216842	0.216506	0.213284	0.213473	0.213	0.217007	0.212689	0.213107	0.212954	0.212563	0.213158	0.213344	0.21338	0.216101	0.212151	0.214391	0.214261	0.214053	0.213136	0.212047	0.211936	0.213217	0.212655	0.211117	0.213307	0.212623	0.214208	0.214274	0.213363	0.212118
3	CE030_MOUSE|Q8VEB3_S167	0.209201	0.211749	0.209773	0.217769	0.215349	0.216881	0.21468	0.214407	0.21567	0.214446	0.212733	0.209228	0.210425	0.212183	0.214299	0.213871	0.213777	0.214578	0.212501	0.212682	0.211372	0.212577	0.212954	0.212563	0.213158	0.213344	0.21338	0.216101	0.212151	0.214391	0.214261	0.214053	0.213136	0.212047	0.211936	0.213217	0.212655	0.211117	0.213307	0.212623	0.214208	0.214274	0.213363	0.212118
3	CE152_MOUSE|A2AUM9_S1575	0.211044	0.20981	0.201668	0.216217	0.216423	0.217235	0.214491	0.217681	0.215149	0.213491	0.212146	0.20634	0.209937	0.209775	0.215048	0.215593	0.219446	0.216559	0.21341	0.212095	0.21384	0.21221	0.21444	0.2108	0.218318	0.214871	0.214511	0.212797	0.213876	0.214334	0.21425	0.214035	0.21452	0.213593	0.212329	0.214564	0.210683	0.212049	0.212303	0.213312	0.210035	0.211033	0.211165	0.212424
3	CE170_MOUSE|Q6A065_S1040_T1044	0.208334	0.210151	0.208429	0.216286	0.220482	0.221291	0.216912	0.212137	0.219692	0.216289	0.216642	0.208608	0.213322	0.203682	0.214356	0.215004	0.212808	0.211859	0.20688	0.212053	0.211076	0.213123	0.213539	0.211694	0.215219	0.213314	0.213966	0.214416	0.213288	0.212209	0.213289	0.214055	0.213127	0.213562	0.212665	0.213994	0.213196	0.21453	0.212228	0.212991	0.211438	0.212202	0.212656	0.212794
3	CE170_MOUSE|Q6A065_S1048	0.208477	0.211288	0.210488	0.215837	0.217066	0.214131	0.214844	0.21356	0.216467	0.212917	0.213586	0.209018	0.210962	0.212682	0.213742	0.216212	0.21537	0.215662	0.210878	0.213081	0.211295	0.212566	0.213539	0.211694	0.215219	0.213314	0.213966	0.214416	0.213288	0.212209	0.213289	0.214055	0.213127	0.213562	0.212665	0.213994	0.213196	0.21453	0.212228	0.212991	0.211438	0.212202	0.212656	0.212794
3	CE170_MOUSE|Q6A065_T1044_S1048	0.211848	0.210033	0.212807	0.208675	0.210493	0.217349	0.214859	0.209155	0.211689	0.212378	0.212664	0.217622	0.210102	0.204764	0.218909	0.218973	0.216858	0.216188	0.212064	0.214007	0.213607	0.214734	0.213539	0.211694	0.215219	0.213314	0.213966	0.214416	0.213288	0.212209	0.213289	0.214055	0.213127	0.213562	0.212665	0.213994	0.213196	0.21453	0.212228	0.212991	0.211438	0.212202	0.212656	0.212794
3	CENPU_MOUSE|Q8C4M7_S182	0.206419	0.215491	0.213879	0.212339	0.216996	0.213293	0.21275	0.21116	0.210893	0.209566	0.210983	0.207335	0.208804	0.208226	0.216448	0.219228	0.217136	0.218872	0.215996	0.216714	0.212889	0.214323	0.212545	0.219762	0.216418	0.211444	0.214185	0.21509	0.212599	0.214317	0.211164	0.212132	0.213043	0.21441	0.214502	0.210557	0.213182	0.213278	0.209958	0.212746	0.215048	0.210049	0.212215	0.211522
3	CHAP1_MOUSE|Q8K327_S405	0.213309	0.209979	0.211481	0.217905	0.215655	0.21738	0.215319	0.21256	0.211687	0.212554	0.212127	0.212422	0.21242	0.216181	0.214878	0.216778	0.216624	0.215029	0.208764	0.209085	0.207915	0.209935	0.212559	0.210508	0.214116	0.214934	0.213447	0.21283	0.212438	0.215254	0.214464	0.214966	0.213619	0.211433	0.210603	0.213319	0.213424	0.211616	0.212377	0.21252	0.212338	0.213329	0.215494	0.214727
3	CHAP1_MOUSE|Q8K327_S434	0.211884	0.21218	0.208713	0.217052	0.215039	0.214432	0.213814	0.214269	0.213662	0.21399	0.211397	0.209825	0.210598	0.213358	0.214838	0.213601	0.214706	0.214529	0.212829	0.212461	0.215009	0.212045	0.212559	0.210508	0.214116	0.214934	0.213447	0.21283	0.212438	0.215254	0.214464	0.214966	0.213619	0.211433	0.210603	0.213319	0.213424	0.211616	0.212377	0.21252	0.212338	0.213329	0.215494	0.214727
3	CHD2_MOUSE|E9PZM4_S1365	0.207974	0.219809	0.213669	0.21146	0.215769	0.210066	0.209665	0.213357	0.214351	0.216402	0.213285	0.205383	0.20679	0.209646	0.213324	0.220217	0.211366	0.211345	0.216686	0.216067	0.217884	0.215122	0.215781	0.219126	0.217228	0.208266	0.211867	0.211719	0.210846	0.214644	0.215537	0.212303	0.211657	0.211884	0.213613	0.207602	0.211881	0.214869	0.213385	0.213114	0.210409	0.214465	0.215765	0.214088
3	CHD4_MOUSE|Q6PDQ2_S1537	0.209084	0.211974	0.205578	0.211789	0.212737	0.213687	0.214537	0.211992	0.208099	0.211995	0.213846	0.210384	0.215126	0.206747	0.219146	0.218643	0.215323	0.216545	0.219131	0.213516	0.215514	0.214354	0.213982	0.217176	0.215351	0.212595	0.21392	0.214463	0.211894	0.213635	0.214109	0.213807	0.212298	0.213329	0.212867	0.210883	0.212108	0.211509	0.21208	0.21281	0.212979	0.212888	0.212859	0.212783
3	CHD4_MOUSE|Q6PDQ2_T1538	0.206287	0.212033	0.212453	0.215739	0.219874	0.217333	0.216878	0.214165	0.209369	0.213854	0.213733	0.206491	0.200523	0.209932	0.219618	0.216411	0.214404	0.215135	0.216952	0.213302	0.212615	0.212294	0.213982	0.217176	0.215351	0.212595	0.21392	0.214463	0.211894	0.213635	0.214109	0.213807	0.212298	0.213329	0.212867	0.210883	0.212108	0.211509	0.21208	0.21281	0.212979	0.212888	0.212859	0.212783
3	CHK1_MOUSE|O35280_S280	0.20833	0.213234	0.212494	0.216122	0.217094	0.217096	0.216101	0.21372	0.214619	0.214897	0.21392	0.208895	0.208323	0.211472	0.21416	0.215226	0.211606	0.213975	0.212256	0.214211	0.210507	0.211825	0.215423	0.216091	0.21653	0.217289	0.214625	0.215252	0.215046	0.212032	0.213116	0.21281	0.213964	0.212265	0.211555	0.215109	0.212743	0.211853	0.209539	0.212836	0.209138	0.21255	0.211039	0.209348
3	CHK1_MOUSE|O35280_T279	0.208067	0.214269	0.214468	0.216438	0.217844	0.215433	0.214027	0.215798	0.215376	0.213901	0.213439	0.207196	0.211335	0.212676	0.21223	0.213538	0.2155	0.211026	0.211493	0.214156	0.211481	0.210384	0.215423	0.216091	0.21653	0.217289	0.214625	0.215252	0.215046	0.212032	0.213116	0.21281	0.213964	0.212265	0.211555	0.215109	0.212743	0.211853	0.209539	0.212836	0.209138	0.21255	0.211039	0.209348
3	CIC_MOUSE|Q924A2_S1809	0.212862	0.209459	0.211131	0.213998	0.219095	0.215248	0.215726	0.211653	0.213216	0.210798	0.211077	0.208705	0.213451	0.211645	0.214317	0.216315	0.216397	0.216529	0.211625	0.210967	0.213392	0.21248	0.21377	0.210678	0.215926	0.21347	0.214079	0.211998	0.212063	0.213652	0.213322	0.210697	0.211981	0.213446	0.214275	0.214186	0.212511	0.212062	0.215785	0.214438	0.211463	0.21228	0.213892	0.214339
3	CIC_MOUSE|Q924A2_S662	0.209047	0.209899	0.21034	0.217932	0.216627	0.21454	0.214874	0.217499	0.216446	0.215468	0.213883	0.206275	0.210683	0.211085	0.212731	0.212487	0.214853	0.212787	0.212177	0.213271	0.212895	0.214208	0.21377	0.210678	0.215926	0.21347	0.214079	0.211998	0.212063	0.213652	0.213322	0.210697	0.211981	0.213446	0.214275	0.214186	0.212511	0.212062	0.215785	0.214438	0.211463	0.21228	0.213892	0.214339
3	CIC_MOUSE|Q924A2_T672	0.209044	0.208873	0.208451	0.212523	0.210792	0.215637	0.215913	0.213125	0.214211	0.211496	0.211988	0.211526	0.21146	0.210499	0.214236	0.215782	0.217797	0.216594	0.217415	0.216403	0.213238	0.213024	0.21377	0.210678	0.215926	0.21347	0.214079	0.211998	0.212063	0.213652	0.213322	0.210697	0.211981	0.213446	0.214275	0.214186	0.212511	0.212062	0.215785	0.214438	0.211463	0.21228	0.213892	0.214339
3	CIC_MOUSE|Q924A2_T753	0.206951	0.209261	0.209889	0.212765	0.214774	0.213454	0.210791	0.214502	0.215022	0.213634	0.217028	0.214337	0.214481	0.209392	0.215115	0.213975	0.213299	0.216242	0.211274	0.214137	0.212526	0.217225	0.21377	0.210678	0.215926	0.21347	0.214079	0.211998	0.212063	0.213652	0.213322	0.210697	0.211981	0.213446	0.214275	0.214186	0.212511	0.212062	0.215785	0.214438	0.211463	0.21228	0.213892	0.214339
3	CJ088_MOUSE|Q9D2Q3_S423	0.211943	0.210327	0.205407	0.216303	0.214652	0.214531	0.212746	0.213096	0.214351	0.210591	0.209892	0.210883	0.210012	0.218299	0.215488	0.214055	0.217208	0.215206	0.213567	0.212955	0.215056	0.213438	0.212536	0.210392	0.215653	0.217449	0.213259	0.215676	0.212871	0.210549	0.210171	0.211015	0.21349	0.214253	0.212011	0.21569	0.213634	0.213996	0.21269	0.215323	0.213236	0.212202	0.211921	0.212217
3	CLAP2_MOUSE|Q8BRT1_S637	0.208252	0.215361	0.206578	0.216497	0.219332	0.215613	0.214438	0.214857	0.214875	0.214451	0.213102	0.206706	0.208547	0.210425	0.212175	0.217244	0.215363	0.214154	0.213143	0.214291	0.211794	0.21267	0.214371	0.215009	0.217577	0.213996	0.214598	0.214401	0.213807	0.214215	0.213606	0.213814	0.213203	0.212013	0.210976	0.212026	0.213325	0.212253	0.21175	0.213196	0.211894	0.210599	0.211695	0.21197
3	CLIP2_MOUSE|Q9Z0H8_S208	0.208988	0.208394	0.208487	0.211298	0.212847	0.212579	0.211965	0.212411	0.215662	0.212818	0.212153	0.205751	0.208653	0.211573	0.217773	0.217614	0.217828	0.217249	0.215979	0.217984	0.21728	0.214469	0.212316	0.207826	0.212755	0.214294	0.211933	0.21286	0.212857	0.211639	0.210791	0.213093	0.212135	0.214419	0.214154	0.215986	0.215878	0.21488	0.214573	0.214739	0.211472	0.214049	0.213965	0.213636
3	CNNM4_MOUSE|Q69ZF7_S661	0.20896	0.214418	0.209329	0.214106	0.214609	0.214922	0.213359	0.214718	0.214022	0.215735	0.21484	0.21202	0.213264	0.211091	0.20925	0.214696	0.212906	0.211565	0.215317	0.216102	0.211813	0.213152	0.213531	0.219774	0.219204	0.212054	0.21267	0.213917	0.211947	0.210187	0.2099	0.20833	0.214152	0.215408	0.211094	0.212199	0.212486	0.213515	0.210574	0.214089	0.214971	0.215157	0.212026	0.212869
3	CNOT4_MOUSE|Q8BT14_S432	0.208322	0.211993	0.211941	0.20922	0.227567	0.217057	0.214077	0.205887	0.209665	0.207254	0.210264	0.225136	0.216323	0.209814	0.215918	0.220538	0.217294	0.223235	0.200185	0.207474	0.204617	0.214308	0.214292	0.212541	0.21644	0.213721	0.213966	0.215802	0.212945	0.21269	0.214263	0.214615	0.212182	0.213138	0.212912	0.215453	0.211478	0.214546	0.212406	0.210009	0.211528	0.210844	0.212961	0.211553
3	COF1_MOUSE|P18760_S24	0.211325	0.208701	0.212584	0.213378	0.216692	0.214517	0.213338	0.210337	0.212334	0.213614	0.21236	0.21091	0.209783	0.21712	0.214571	0.21738	0.215984	0.213261	0.212198	0.214768	0.212412	0.212587	0.213849	0.20741	0.21433	0.213776	0.212655	0.213175	0.215718	0.21336	0.213641	0.213686	0.215611	0.211944	0.213009	0.214443	0.213243	0.212788	0.212721	0.21292	0.214148	0.212066	0.211517	0.214269
3	COG7_MOUSE|Q3UM29_S506	0.207488	0.210159	0.209365	0.213602	0.215825	0.213069	0.212958	0.211271	0.212221	0.212466	0.212219	0.209708	0.21131	0.213831	0.215001	0.217664	0.215436	0.215148	0.216044	0.215886	0.214316	0.215107	0.213724	0.212739	0.218521	0.212448	0.21266	0.212588	0.213164	0.211807	0.213103	0.212788	0.213718	0.213137	0.213548	0.214196	0.21368	0.21286	0.212683	0.213742	0.213078	0.212631	0.211946	0.211563
3	COPA_MOUSE|Q8CIE6_S173	0.210541	0.212841	0.209977	0.212778	0.21491	0.213644	0.21271	0.213983	0.215622	0.215658	0.214942	0.209257	0.208791	0.211133	0.212622	0.213129	0.213849	0.211919	0.217398	0.215461	0.215003	0.214001	0.21324	0.216075	0.211406	0.212743	0.212327	0.212607	0.21221	0.212043	0.212023	0.212481	0.212398	0.213172	0.214989	0.212839	0.213904	0.214401	0.213429	0.21323	0.214111	0.214016	0.213869	0.212843
3	COR1A_MOUSE|O89053_T424	0.210911	0.206558	0.208908	0.211613	0.212326	0.21715	0.219765	0.209929	0.20956	0.214658	0.21462	0.213593	0.211592	0.210299	0.217881	0.217461	0.210124	0.209454	0.216781	0.214594	0.215557	0.216466	0.214967	0.2115	0.212965	0.213836	0.212902	0.213994	0.213534	0.21253	0.213152	0.213677	0.212526	0.213599	0.21283	0.215049	0.213248	0.213585	0.212982	0.212602	0.212511	0.211961	0.212595	0.213832
3	CP135_MOUSE|Q6P5D4_S1130	0.211695	0.211971	0.209317	0.213241	0.215372	0.213534	0.216164	0.213252	0.21206	0.212163	0.213883	0.213095	0.209497	0.210289	0.213947	0.215431	0.217067	0.213677	0.215233	0.212369	0.215587	0.211358	0.212382	0.21148	0.217008	0.214639	0.214466	0.213331	0.21398	0.213372	0.2141	0.213203	0.214095	0.212845	0.210963	0.215172	0.211933	0.213453	0.210783	0.213024	0.212511	0.21147	0.212926	0.213177
3	CREB1_MOUSE|Q01147_S142	0.207638	0.209963	0.213751	0.217115	0.221376	0.215307	0.215328	0.212024	0.218035	0.213515	0.210261	0.207452	0.206202	0.213498	0.21575	0.218777	0.217648	0.216595	0.207058	0.209566	0.211099	0.211577	0.210811	0.209022	0.217064	0.215158	0.218907	0.213305	0.214505	0.215813	0.216559	0.216971	0.21352	0.209574	0.213149	0.21335	0.210369	0.209475	0.211624	0.211631	0.210823	0.21243	0.212698	0.213294
3	CRTC2_MOUSE|Q3U182_S136	0.208031	0.207383	0.204808	0.214427	0.217307	0.215801	0.216345	0.207918	0.211821	0.210811	0.210783	0.20954	0.209765	0.210675	0.219271	0.218739	0.219242	0.217742	0.214473	0.215952	0.21335	0.215347	0.21888	0.210454	0.216513	0.207393	0.206087	0.21531	0.209807	0.210747	0.211502	0.212156	0.212742	0.219245	0.215542	0.212755	0.212132	0.212833	0.215423	0.212689	0.215712	0.214394	0.213962	0.213625
3	CRTC3_MOUSE|Q91X84_S391	0.209735	0.211906	0.212069	0.212826	0.215806	0.212843	0.215183	0.209525	0.212547	0.211733	0.211248	0.213511	0.2131	0.211141	0.214211	0.21563	0.21508	0.215211	0.214075	0.214674	0.213233	0.214964	0.214717	0.210488	0.213527	0.210829	0.219018	0.216071	0.211417	0.211284	0.217333	0.211287	0.211885	0.217191	0.21242	0.211527	0.213887	0.211119	0.212569	0.21952	0.207427	0.209184	0.211485	0.21574
3	CSDE1_MOUSE|Q91W50_S116	0.20914	0.214385	0.213037	0.211148	0.213333	0.215846	0.214317	0.211864	0.213652	0.214977	0.213016	0.210025	0.208084	0.216631	0.217362	0.218245	0.215902	0.211447	0.219398	0.210223	0.208766	0.209102	0.211149	0.210669	0.213332	0.215277	0.212802	0.214502	0.215346	0.215066	0.213654	0.216916	0.214991	0.211846	0.211369	0.211845	0.213195	0.213576	0.212089	0.211394	0.213641	0.212585	0.212054	0.212986
3	CSDE1_MOUSE|Q91W50_S584	0.208656	0.204885	0.205718	0.213679	0.216867	0.214376	0.215313	0.211184	0.211347	0.216017	0.217769	0.210891	0.207974	0.20877	0.217708	0.216861	0.214704	0.213798	0.217333	0.213451	0.215625	0.216722	0.211149	0.210669	0.213332	0.215277	0.212802	0.214502	0.215346	0.215066	0.213654	0.216916	0.214991	0.211846	0.211369	0.211845	0.213195	0.213576	0.212089	0.211394	0.213641	0.212585	0.212054	0.212986
3	CSKI2_MOUSE|Q8VHK1_S396	0.217339	0.209445	0.200974	0.218208	0.217698	0.212533	0.212281	0.210153	0.209429	0.213761	0.21305	0.213673	0.215826	0.213812	0.216595	0.215517	0.218861	0.213103	0.210072	0.207704	0.216314	0.213229	0.21444	0.213691	0.212384	0.216165	0.214736	0.215279	0.214813	0.213813	0.21338	0.216166	0.213386	0.211369	0.211907	0.217353	0.213595	0.211812	0.212094	0.20737	0.212507	0.211119	0.209432	0.213351
3	CSKI2_MOUSE|Q8VHK1_S874	0.20532	0.213323	0.214293	0.215205	0.217883	0.213901	0.216349	0.212317	0.216081	0.213822	0.214362	0.204835	0.208695	0.215673	0.215324	0.218064	0.209804	0.212839	0.213183	0.215198	0.210306	0.213032	0.21444	0.213691	0.212384	0.216165	0.214736	0.215279	0.214813	0.213813	0.21338	0.216166	0.213386	0.211369	0.211907	0.217353	0.213595	0.211812	0.212094	0.20737	0.212507	0.211119	0.209432	0.213351
3	CSKI2_MOUSE|Q8VHK1_S875	0.205889	0.214006	0.208893	0.213769	0.220003	0.216943	0.213854	0.213253	0.217122	0.214991	0.215504	0.198665	0.207365	0.211053	0.215193	0.21757	0.212257	0.213874	0.21618	0.218875	0.212805	0.211233	0.21444	0.213691	0.212384	0.216165	0.214736	0.215279	0.214813	0.213813	0.21338	0.216166	0.213386	0.211369	0.211907	0.217353	0.213595	0.211812	0.212094	0.20737	0.212507	0.211119	0.209432	0.213351
3	CSN3_MOUSE|O88543_S421	0.206036	0.208263	0.209442	0.211902	0.216643	0.213509	0.214143	0.2097	0.212821	0.2115	0.214744	0.206864	0.207805	0.209489	0.220595	0.220852	0.219285	0.218588	0.216535	0.214166	0.21158	0.215011	0.21522	0.210246	0.218023	0.213101	0.211676	0.213667	0.213012	0.214456	0.211632	0.212679	0.21407	0.212462	0.212593	0.213827	0.212167	0.214583	0.213945	0.21256	0.212493	0.212047	0.211755	0.214074
3	CT2NL_MOUSE|Q99LJ0_S562	0.202936	0.210308	0.20944	0.217196	0.219161	0.216219	0.215149	0.211902	0.211482	0.209526	0.20979	0.205088	0.207286	0.214041	0.216916	0.222208	0.219421	0.217834	0.214188	0.215196	0.212515	0.21147	0.212725	0.210388	0.21428	0.215207	0.214241	0.212438	0.213143	0.212674	0.212587	0.211918	0.212718	0.213471	0.213206	0.214764	0.212694	0.214268	0.215134	0.213914	0.211122	0.212439	0.213456	0.213554
3	CTDP1_MOUSE|Q7TSG2_S502	0.207618	0.211932	0.207577	0.210139	0.225225	0.216407	0.215147	0.211579	0.21718	0.216289	0.215761	0.21603	0.212776	0.204362	0.215198	0.216316	0.212676	0.216778	0.204299	0.210875	0.209161	0.215945	0.214249	0.210793	0.216629	0.214253	0.214198	0.213384	0.214171	0.213291	0.21365	0.215206	0.213296	0.213273	0.211783	0.214225	0.212804	0.212808	0.212379	0.212485	0.21086	0.211568	0.211844	0.213171
3	CTND1_MOUSE|P30999_S349	0.211239	0.210798	0.211845	0.213491	0.215087	0.218854	0.216643	0.209931	0.211719	0.211887	0.211263	0.211672	0.213146	0.211587	0.214491	0.219791	0.21589	0.214662	0.212595	0.212514	0.209101	0.211844	0.213908	0.211728	0.215516	0.213101	0.213963	0.214123	0.214202	0.212333	0.213536	0.214528	0.214083	0.214039	0.212499	0.213691	0.212784	0.213223	0.212175	0.212723	0.211952	0.212334	0.211337	0.212582
3	CTND1_MOUSE|P30999_S861	0.206484	0.211403	0.212504	0.210548	0.220411	0.213029	0.212086	0.213048	0.216608	0.213076	0.215484	0.205377	0.209814	0.211878	0.215667	0.218736	0.2148	0.215709	0.2126	0.214264	0.21043	0.215845	0.213908	0.211728	0.215516	0.213101	0.213963	0.214123	0.214202	0.212333	0.213536	0.214528	0.214083	0.214039	0.212499	0.213691	0.212784	0.213223	0.212175	0.212723	0.211952	0.212334	0.211337	0.212582
3	CTND2_MOUSE|O35927_S435	0.200118	0.209058	0.207756	0.216423	0.220949	0.211833	0.212432	0.217495	0.216751	0.209361	0.207973	0.200881	0.204983	0.221899	0.212611	0.219198	0.217838	0.216648	0.216767	0.216748	0.214973	0.215926	0.216568	0.213863	0.219815	0.212488	0.215031	0.210255	0.211681	0.212415	0.214774	0.211203	0.213751	0.212629	0.213795	0.217711	0.210489	0.208408	0.211869	0.208969	0.212055	0.213365	0.215295	0.213626
3	CTND2_MOUSE|O35927_S458	0.206037	0.209335	0.208491	0.214894	0.219758	0.215677	0.215227	0.213242	0.215417	0.211598	0.212712	0.203786	0.205997	0.211436	0.214123	0.219448	0.219019	0.215966	0.215385	0.215417	0.213256	0.213285	0.216568	0.213863	0.219815	0.212488	0.215031	0.210255	0.211681	0.212415	0.214774	0.211203	0.213751	0.212629	0.213795	0.217711	0.210489	0.208408	0.211869	0.208969	0.212055	0.213365	0.215295	0.213626
3	CUX1_MOUSE|P53564_S1054	0.214449	0.211378	0.206335	0.214264	0.21494	0.215976	0.216561	0.211991	0.207602	0.213541	0.21181	0.213268	0.212437	0.213506	0.216077	0.217258	0.215957	0.214139	0.213815	0.211979	0.211873	0.210902	0.214248	0.209692	0.214709	0.215234	0.212441	0.217277	0.214105	0.215344	0.21473	0.215008	0.21366	0.213056	0.210557	0.212419	0.212869	0.210807	0.211667	0.212801	0.213137	0.210625	0.212695	0.213167
3	CYFP1_MOUSE|Q7TMB8_T1234	0.209263	0.216469	0.215967	0.21197	0.215322	0.213379	0.213409	0.212233	0.21422	0.214852	0.212914	0.20986	0.20955	0.213744	0.214055	0.216131	0.211992	0.213746	0.214125	0.215153	0.209579	0.212249	0.212528	0.216669	0.215458	0.212249	0.212849	0.212173	0.212967	0.211596	0.212687	0.212179	0.213334	0.213379	0.21345	0.211741	0.2137	0.213855	0.213009	0.213645	0.213599	0.214278	0.211783	0.21322
3	CYTSB_MOUSE|Q5SXY1_S359	0.203051	0.209373	0.212978	0.211686	0.208889	0.212983	0.212665	0.214654	0.212859	0.213985	0.214946	0.210062	0.21232	0.209893	0.216349	0.217427	0.214921	0.212474	0.220384	0.216877	0.215476	0.215523	0.214272	0.211277	0.217233	0.212796	0.213285	0.214722	0.213427	0.213662	0.210719	0.214064	0.212603	0.213886	0.212775	0.212286	0.213856	0.214586	0.212311	0.213992	0.211171	0.21192	0.212348	0.213124
3	CYTSB_MOUSE|Q5SXY1_S360	0.206064	0.206791	0.207166	0.212187	0.210226	0.212702	0.211413	0.214983	0.212209	0.215318	0.215493	0.210327	0.214089	0.2115	0.215538	0.216688	0.216082	0.213788	0.219378	0.216674	0.213922	0.217264	0.214272	0.211277	0.217233	0.212796	0.213285	0.214722	0.213427	0.213662	0.210719	0.214064	0.212603	0.213886	0.212775	0.212286	0.213856	0.214586	0.212311	0.213992	0.211171	0.21192	0.212348	0.213124
3	CYTSB_MOUSE|Q5SXY1_S810	0.210434	0.207526	0.211238	0.214435	0.218466	0.220695	0.216851	0.21544	0.212454	0.217389	0.215915	0.207916	0.207265	0.205245	0.214792	0.220519	0.216674	0.214794	0.211765	0.209254	0.211587	0.2088	0.214272	0.211277	0.217233	0.212796	0.213285	0.214722	0.213427	0.213662	0.210719	0.214064	0.212603	0.213886	0.212775	0.212286	0.213856	0.214586	0.212311	0.213992	0.211171	0.21192	0.212348	0.213124
3	CYTSB_MOUSE|Q5SXY1_S847	0.207288	0.214593	0.211359	0.216475	0.21582	0.211925	0.212739	0.212463	0.209627	0.216123	0.2143	0.206546	0.206497	0.211399	0.218317	0.220106	0.216312	0.217463	0.215488	0.213801	0.210509	0.210569	0.214272	0.211277	0.217233	0.212796	0.213285	0.214722	0.213427	0.213662	0.210719	0.214064	0.212603	0.213886	0.212775	0.212286	0.213856	0.214586	0.212311	0.213992	0.211171	0.21192	0.212348	0.213124
3	DAB2_MOUSE|P98078_S323	0.211557	0.210856	0.215112	0.216239	0.220069	0.216481	0.215498	0.213068	0.214146	0.211718	0.214336	0.205835	0.207701	0.212483	0.214134	0.217565	0.215566	0.214127	0.211482	0.209437	0.209928	0.21254	0.216761	0.211367	0.217843	0.216947	0.215102	0.213745	0.214814	0.216079	0.216365	0.215061	0.216057	0.210207	0.20993	0.21167	0.210601	0.208746	0.212185	0.211129	0.210483	0.20984	0.212247	0.212856
3	DAB2_MOUSE|P98078_S401	0.208472	0.209288	0.210614	0.216506	0.215185	0.216196	0.216319	0.215527	0.21653	0.218072	0.217215	0.2086	0.206012	0.210016	0.213828	0.212651	0.212571	0.211421	0.215021	0.214309	0.212998	0.212534	0.216761	0.211367	0.217843	0.216947	0.215102	0.213745	0.214814	0.216079	0.216365	0.215061	0.216057	0.210207	0.20993	0.21167	0.210601	0.208746	0.212185	0.211129	0.210483	0.20984	0.212247	0.212856
3	DAB2_MOUSE|P98078_S674	0.214513	0.207817	0.210367	0.215617	0.218611	0.214216	0.216004	0.211224	0.211386	0.211386	0.216848	0.207148	0.206177	0.206118	0.214393	0.21886	0.221961	0.214965	0.214607	0.210139	0.215204	0.211979	0.216761	0.211367	0.217843	0.216947	0.215102	0.213745	0.214814	0.216079	0.216365	0.215061	0.216057	0.210207	0.20993	0.21167	0.210601	0.208746	0.212185	0.211129	0.210483	0.20984	0.212247	0.212856
3	DAB2_MOUSE|P98078_T671	0.210101	0.212721	0.212664	0.216608	0.217163	0.211481	0.216291	0.211222	0.212102	0.213316	0.215705	0.205117	0.207141	0.207122	0.219949	0.217587	0.218702	0.21431	0.216143	0.20893	0.213789	0.211485	0.216761	0.211367	0.217843	0.216947	0.215102	0.213745	0.214814	0.216079	0.216365	0.215061	0.216057	0.210207	0.20993	0.21167	0.210601	0.208746	0.212185	0.211129	0.210483	0.20984	0.212247	0.212856
3	DBR1_MOUSE|Q923B1_S520	0.211314	0.215552	0.209629	0.218192	0.221827	0.215179	0.21596	0.219288	0.223726	0.218083	0.21728	0.199439	0.199131	0.206875	0.2107	0.209695	0.211569	0.212198	0.21297	0.212772	0.212929	0.214297	0.21175	0.213885	0.212828	0.213697	0.214562	0.213656	0.214421	0.213518	0.214589	0.214204	0.215262	0.212023	0.211897	0.213728	0.211494	0.212196	0.211165	0.211775	0.214498	0.214476	0.210992	0.213714
3	DC1I2_MOUSE|O88487_S81	0.209175	0.209004	0.210717	0.215452	0.217092	0.214456	0.214141	0.207513	0.209916	0.206064	0.213356	0.209141	0.214473	0.212293	0.214258	0.218031	0.218295	0.215615	0.216927	0.21481	0.213622	0.21547	0.211535	0.210005	0.216943	0.212453	0.214125	0.213685	0.215593	0.212743	0.2126	0.214613	0.214725	0.213299	0.214464	0.21218	0.212619	0.215432	0.211783	0.212426	0.212542	0.212092	0.211408	0.213022
3	DCA10_MOUSE|A2AKB9_S356	0.204034	0.211837	0.216183	0.215968	0.215592	0.215497	0.216653	0.212213	0.216248	0.213298	0.214909	0.209178	0.20714	0.21346	0.216701	0.2173	0.212661	0.214115	0.211656	0.214369	0.209194	0.211637	0.212379	0.21075	0.214765	0.214666	0.214873	0.210889	0.212016	0.21228	0.21252	0.212016	0.214096	0.214262	0.214348	0.21587	0.20945	0.209631	0.214061	0.211214	0.216317	0.214175	0.213394	0.216244
3	DCP1A_MOUSE|Q91YD3_S206	0.20946	0.209421	0.21122	0.214948	0.213467	0.218167	0.216474	0.210855	0.209108	0.210968	0.213735	0.209246	0.211495	0.204522	0.218449	0.217889	0.217022	0.214908	0.216304	0.213801	0.212447	0.215862	0.212331	0.199791	0.208991	0.213757	0.21251	0.213464	0.214148	0.214625	0.213444	0.211011	0.214841	0.212639	0.211549	0.21668	0.213734	0.213942	0.21563	0.215881	0.213025	0.21462	0.216668	0.216515
3	DDX17_MOUSE|Q501J6_S493	0.209881	0.213378	0.207158	0.212894	0.214949	0.21826	0.216304	0.214631	0.213718	0.209726	0.21164	0.20766	0.211023	0.207946	0.214362	0.216197	0.222324	0.214823	0.215342	0.216139	0.208784	0.212587	0.214035	0.213617	0.211317	0.214213	0.214038	0.212144	0.213016	0.213326	0.214063	0.2131	0.21277	0.21393	0.212084	0.215954	0.212775	0.213137	0.213228	0.212278	0.21221	0.211755	0.213966	0.213408
3	DDX20_MOUSE|Q9JJY4_S569	0.212182	0.210112	0.209172	0.21519	0.213652	0.213309	0.212898	0.214904	0.214267	0.213911	0.211744	0.211242	0.212058	0.214856	0.212702	0.212734	0.214644	0.213715	0.214199	0.213455	0.215813	0.213525	0.214635	0.213111	0.217512	0.215169	0.214371	0.21629	0.213101	0.213385	0.213367	0.21373	0.213917	0.214294	0.211942	0.213075	0.213958	0.211783	0.211533	0.213062	0.209377	0.210051	0.211012	0.211562
3	DDX51_MOUSE|Q6P9R1_S77	0.209126	0.211377	0.208342	0.215893	0.21356	0.215248	0.214305	0.214451	0.214266	0.216426	0.21569	0.208881	0.208717	0.207917	0.215873	0.21358	0.213784	0.214308	0.215362	0.215494	0.214983	0.212447	0.21573	0.216405	0.217827	0.212326	0.212193	0.214545	0.212882	0.212715	0.211057	0.212743	0.212405	0.214736	0.213517	0.208803	0.213916	0.213901	0.211865	0.214351	0.213085	0.209775	0.21207	0.213366
3	DDX51_MOUSE|Q6P9R1_S79	0.208607	0.208742	0.206977	0.216928	0.213648	0.215046	0.213745	0.213297	0.213478	0.216014	0.214467	0.20884	0.206331	0.207766	0.216336	0.214399	0.215544	0.21708	0.215757	0.216955	0.215844	0.213998	0.21573	0.216405	0.217827	0.212326	0.212193	0.214545	0.212882	0.212715	0.211057	0.212743	0.212405	0.214736	0.213517	0.208803	0.213916	0.213901	0.211865	0.214351	0.213085	0.209775	0.21207	0.213366
3	DEFI6_MOUSE|Q8C2K1_S597	0.209675	0.210796	0.211436	0.213902	0.215409	0.212814	0.213334	0.213747	0.213423	0.211614	0.20958	0.210676	0.212129	0.216754	0.213363	0.216304	0.216836	0.214554	0.212933	0.213888	0.214323	0.212716	0.213199	0.209085	0.216961	0.214131	0.213444	0.21248	0.213416	0.211302	0.212783	0.212756	0.214275	0.213061	0.213125	0.214194	0.212993	0.213578	0.214308	0.213235	0.212184	0.213443	0.213513	0.212854
3	DEFI6_MOUSE|Q8C2K1_S605	0.204542	0.198493	0.219316	0.212454	0.213677	0.215036	0.215709	0.20735	0.206234	0.215035	0.219882	0.210546	0.21098	0.207805	0.219674	0.22451	0.215902	0.215024	0.217194	0.213043	0.211588	0.214751	0.213199	0.209085	0.216961	0.214131	0.213444	0.21248	0.213416	0.211302	0.212783	0.212756	0.214275	0.213061	0.213125	0.214194	0.212993	0.213578	0.214308	0.213235	0.212184	0.213443	0.213513	0.212854
3	DEN1A_MOUSE|Q8K382_S520_S523	0.207146	0.208428	0.210264	0.212535	0.214925	0.21359	0.212706	0.213354	0.217103	0.213752	0.215044	0.208517	0.209908	0.211966	0.214762	0.2157	0.214574	0.214336	0.215418	0.215479	0.215389	0.215154	0.211407	0.212355	0.216467	0.212209	0.21465	0.211074	0.211089	0.210027	0.213891	0.211357	0.211473	0.213111	0.213511	0.214861	0.212756	0.213873	0.213569	0.213654	0.213295	0.214927	0.214844	0.215873
3	DEN4C_MOUSE|A6H8H2_S1096	0.208849	0.207738	0.202094	0.213671	0.217821	0.219072	0.214389	0.213984	0.217787	0.214123	0.215853	0.204134	0.208302	0.206962	0.213304	0.215873	0.217339	0.214639	0.215301	0.218733	0.21382	0.215522	0.213406	0.215526	0.216165	0.214246	0.214728	0.214645	0.213865	0.213286	0.214269	0.214158	0.212726	0.212687	0.211778	0.212321	0.212367	0.212299	0.211569	0.212563	0.211443	0.212462	0.211836	0.211983
3	DEN4C_MOUSE|A6H8H2_S1321	0.207499	0.216384	0.209851	0.215874	0.221373	0.215209	0.214528	0.214231	0.216356	0.213006	0.212723	0.20746	0.210605	0.21382	0.212076	0.215908	0.213468	0.213658	0.211137	0.21282	0.209856	0.212082	0.213406	0.215526	0.216165	0.214246	0.214728	0.214645	0.213865	0.213286	0.214269	0.214158	0.212726	0.212687	0.211778	0.212321	0.212367	0.212299	0.211569	0.212563	0.211443	0.212462	0.211836	0.211983
3	DEN4C_MOUSE|A6H8H2_S1620	0.208309	0.210826	0.209058	0.213275	0.213468	0.212806	0.211991	0.218376	0.218128	0.219155	0.216953	0.208711	0.209916	0.211913	0.211941	0.210748	0.210584	0.211371	0.216997	0.215504	0.214229	0.215627	0.213406	0.215526	0.216165	0.214246	0.214728	0.214645	0.213865	0.213286	0.214269	0.214158	0.212726	0.212687	0.211778	0.212321	0.212367	0.212299	0.211569	0.212563	0.211443	0.212462	0.211836	0.211983
3	DEN4C_MOUSE|A6H8H2_S971	0.208646	0.215295	0.213956	0.213725	0.216436	0.215158	0.213455	0.21273	0.21378	0.212257	0.213058	0.210457	0.212159	0.210459	0.21454	0.214148	0.212315	0.217469	0.213611	0.213971	0.210043	0.212535	0.213406	0.215526	0.216165	0.214246	0.214728	0.214645	0.213865	0.213286	0.214269	0.214158	0.212726	0.212687	0.211778	0.212321	0.212367	0.212299	0.211569	0.212563	0.211443	0.212462	0.211836	0.211983
3	DEN4C_MOUSE|A6H8H2_T1320	0.204133	0.21923	0.207671	0.21261	0.219554	0.215715	0.214265	0.212373	0.21274	0.212486	0.213338	0.211065	0.207077	0.215443	0.214794	0.219729	0.21323	0.211166	0.214463	0.216006	0.210802	0.211791	0.213406	0.215526	0.216165	0.214246	0.214728	0.214645	0.213865	0.213286	0.214269	0.214158	0.212726	0.212687	0.211778	0.212321	0.212367	0.212299	0.211569	0.212563	0.211443	0.212462	0.211836	0.211983
3	DHE3_MOUSE|P26443_T410	0.207471	0.207252	0.206365	0.213217	0.21201	0.21163	0.211716	0.215505	0.215004	0.21616	0.215685	0.20841	0.211996	0.208786	0.21512	0.21402	0.213686	0.212807	0.216465	0.218452	0.220161	0.217791	0.211963	0.214184	0.214149	0.213433	0.213659	0.211422	0.213433	0.212337	0.214117	0.211703	0.215224	0.21261	0.214388	0.214194	0.21281	0.213041	0.211964	0.213773	0.213718	0.213227	0.211846	0.213172
3	DIAP1_MOUSE|O08808_S22	0.20678	0.206587	0.206999	0.214703	0.217274	0.216538	0.215816	0.214895	0.215032	0.215489	0.216115	0.205506	0.206051	0.20505	0.21471	0.21864	0.216599	0.216018	0.21443	0.216213	0.215523	0.214448	0.212879	0.212323	0.215271	0.213431	0.212878	0.211407	0.212016	0.212034	0.213281	0.210273	0.211213	0.214454	0.21348	0.216016	0.21293	0.213482	0.214441	0.215517	0.211943	0.21347	0.213471	0.214103
3	DIDO1_MOUSE|Q8C9B9_S1199	0.214099	0.212374	0.209686	0.212555	0.218458	0.217398	0.213813	0.209845	0.211268	0.21117	0.208298	0.21176	0.210843	0.211048	0.214068	0.222756	0.220494	0.217621	0.208082	0.211677	0.212257	0.210097	0.214633	0.215407	0.217125	0.212143	0.214518	0.213754	0.21002	0.213343	0.213609	0.209656	0.210579	0.211714	0.212632	0.210526	0.212235	0.211403	0.215399	0.21607	0.212892	0.213736	0.21531	0.213506
3	DMXL1_MOUSE|Q6PNC0_T571	0.205834	0.213403	0.212271	0.212109	0.224708	0.219245	0.216675	0.208601	0.212124	0.213848	0.217539	0.213006	0.206867	0.206534	0.216394	0.221281	0.212493	0.217152	0.206555	0.214375	0.205877	0.212221	0.214375	0.216149	0.218998	0.213595	0.213565	0.211781	0.214367	0.21279	0.213787	0.214189	0.214887	0.21278	0.212466	0.211136	0.212676	0.212167	0.211893	0.212097	0.211614	0.212044	0.211138	0.211756
3	DMXL2_MOUSE|Q8BPN8_S1399	0.206038	0.211576	0.211668	0.213006	0.210097	0.214498	0.214687	0.20986	0.208243	0.214522	0.214986	0.215284	0.211779	0.214782	0.217289	0.21606	0.214128	0.21064	0.21877	0.218581	0.210481	0.212926	0.215147	0.216871	0.208094	0.21454	0.212834	0.211595	0.211066	0.210933	0.214606	0.212092	0.21208	0.212505	0.2121	0.217664	0.214122	0.211904	0.211997	0.212641	0.213838	0.21457	0.213658	0.215334
3	DNM1L_MOUSE|Q8K1M6_S622	0.213197	0.211349	0.212131	0.215914	0.217344	0.215091	0.214872	0.212504	0.212194	0.213068	0.210999	0.21217	0.211831	0.215247	0.214128	0.216556	0.215204	0.215976	0.210471	0.208615	0.210577	0.21071	0.213703	0.211859	0.212917	0.213962	0.213652	0.213313	0.21439	0.21318	0.212198	0.213813	0.21539	0.213259	0.21197	0.214542	0.213224	0.213088	0.212854	0.211255	0.213492	0.212984	0.212115	0.213212
3	DNM3A_MOUSE|O88508_T247	0.210803	0.211392	0.213437	0.215953	0.21647	0.217934	0.217635	0.212904	0.21334	0.215642	0.214407	0.210293	0.20862	0.208951	0.214269	0.214254	0.214862	0.212957	0.212502	0.213217	0.210749	0.209475	0.215473	0.215234	0.213662	0.215327	0.215236	0.214065	0.213688	0.214096	0.213856	0.214142	0.212775	0.212228	0.211761	0.214116	0.212307	0.211032	0.212812	0.212171	0.210736	0.212154	0.211129	0.212314
3	DNMBP_MOUSE|Q6TXD4_S381	0.204346	0.206254	0.208582	0.215508	0.216229	0.212945	0.213765	0.217992	0.217579	0.216573	0.216979	0.204716	0.208901	0.20844	0.213478	0.213226	0.213876	0.212802	0.216105	0.216822	0.217376	0.216991	0.214486	0.212362	0.218033	0.215137	0.211458	0.212971	0.21524	0.212534	0.211026	0.211901	0.21292	0.214668	0.212866	0.214173	0.213852	0.211853	0.212705	0.214683	0.213522	0.211149	0.211161	0.211568
3	DOC11_MOUSE|A2AF47_S1237	0.212521	0.203402	0.213991	0.21222	0.216883	0.217706	0.217457	0.210973	0.214171	0.216506	0.217147	0.214159	0.21381	0.203999	0.209777	0.214779	0.214882	0.213845	0.216736	0.208714	0.212408	0.213583	0.213391	0.216928	0.215629	0.213484	0.213153	0.212272	0.211459	0.212767	0.212027	0.211735	0.210656	0.213247	0.213509	0.213725	0.212993	0.213877	0.213468	0.21424	0.212874	0.212782	0.213366	0.212745
3	DOCK2_MOUSE|Q8C3J5_S1591	0.212877	0.212949	0.196771	0.212475	0.213276	0.212409	0.213941	0.21107	0.215231	0.212522	0.212943	0.212135	0.218013	0.212055	0.212619	0.217444	0.215928	0.212991	0.213733	0.216535	0.216455	0.215202	0.21287	0.216628	0.215927	0.212844	0.21389	0.213496	0.213258	0.212507	0.213259	0.213119	0.213091	0.212824	0.213583	0.211873	0.212446	0.213419	0.212164	0.213051	0.213345	0.213016	0.211409	0.21233
3	DOCK5_MOUSE|B2RY04_S1755	0.210502	0.209324	0.211923	0.215995	0.214243	0.213927	0.212436	0.214811	0.214457	0.217165	0.212246	0.209608	0.207612	0.213372	0.215319	0.212964	0.213723	0.214704	0.213901	0.213512	0.213543	0.214871	0.214058	0.215449	0.216208	0.213917	0.214423	0.215826	0.214129	0.213631	0.214408	0.213626	0.213237	0.21218	0.21178	0.209911	0.211776	0.211646	0.212033	0.214558	0.212622	0.212483	0.210051	0.212324
3	DOCK5_MOUSE|B2RY04_T1811	0.196063	0.22278	0.223276	0.216691	0.218443	0.210741	0.210509	0.216055	0.208521	0.218995	0.216572	0.195931	0.19908	0.219749	0.22187	0.222816	0.202954	0.205286	0.221183	0.214623	0.210685	0.213925	0.214058	0.215449	0.216208	0.213917	0.214423	0.215826	0.214129	0.213631	0.214408	0.213626	0.213237	0.21218	0.21178	0.209911	0.211776	0.211646	0.212033	0.214558	0.212622	0.212483	0.210051	0.212324
3	DOCK7_MOUSE|Q8R1A4_S182	0.206162	0.209372	0.208833	0.210945	0.215706	0.219294	0.216398	0.208606	0.210458	0.211763	0.212282	0.212903	0.209844	0.213711	0.215946	0.222768	0.215662	0.215486	0.215586	0.21641	0.210306	0.211215	0.211927	0.212368	0.213547	0.213263	0.212992	0.212667	0.211904	0.212828	0.21268	0.212623	0.210599	0.214	0.212733	0.214559	0.214324	0.213525	0.214324	0.214853	0.213147	0.213358	0.213989	0.214158
3	DOCK7_MOUSE|Q8R1A4_S945	0.211985	0.213045	0.212167	0.213972	0.21389	0.215581	0.216939	0.213908	0.213823	0.215917	0.215232	0.211882	0.210737	0.2071	0.214364	0.211994	0.212376	0.213824	0.215049	0.21278	0.21178	0.211853	0.211927	0.212368	0.213547	0.213263	0.212992	0.212667	0.211904	0.212828	0.21268	0.212623	0.210599	0.214	0.212733	0.214559	0.214324	0.213525	0.214324	0.214853	0.213147	0.213358	0.213989	0.214158
3	DOCK7_MOUSE|Q8R1A4_S963	0.20787	0.209886	0.200058	0.212489	0.217415	0.219159	0.214881	0.20928	0.213937	0.212625	0.213419	0.211803	0.210364	0.205601	0.217449	0.219214	0.217025	0.220912	0.213297	0.216607	0.208066	0.217789	0.211927	0.212368	0.213547	0.213263	0.212992	0.212667	0.211904	0.212828	0.21268	0.212623	0.210599	0.214	0.212733	0.214559	0.214324	0.213525	0.214324	0.214853	0.213147	0.213358	0.213989	0.214158
3	DOK2_MOUSE|O70469_S133	0.209224	0.211277	0.20314	0.213381	0.214478	0.2132	0.210749	0.211164	0.207216	0.210895	0.210481	0.216557	0.2099	0.215101	0.215581	0.219685	0.216803	0.213736	0.21486	0.216159	0.217651	0.218412	0.214411	0.213423	0.207568	0.213562	0.214658	0.214339	0.215177	0.21335	0.214158	0.214281	0.212327	0.215736	0.21408	0.214853	0.211714	0.213154	0.212344	0.211319	0.211547	0.212014	0.211833	0.214408
3	DOK2_MOUSE|O70469_S370	0.208378	0.211759	0.207069	0.215667	0.214515	0.205831	0.2129	0.213675	0.217296	0.214279	0.21705	0.208133	0.207541	0.209817	0.215861	0.212148	0.214117	0.214902	0.215869	0.215997	0.217769	0.219117	0.214411	0.213423	0.207568	0.213562	0.214658	0.214339	0.215177	0.21335	0.214158	0.214281	0.212327	0.215736	0.21408	0.214853	0.211714	0.213154	0.212344	0.211319	0.211547	0.212014	0.211833	0.214408
3	DONS_MOUSE|Q9QXP4_S26	0.214102	0.211887	0.212013	0.212499	0.218299	0.219862	0.217782	0.211284	0.210861	0.211185	0.214351	0.207617	0.209339	0.209502	0.217598	0.221507	0.21513	0.216092	0.208744	0.211639	0.209245	0.209116	0.219358	0.220911	0.223454	0.208948	0.20915	0.217543	0.210474	0.206544	0.204573	0.216011	0.210914	0.216948	0.214372	0.217579	0.214345	0.21512	0.19721	0.210895	0.21705	0.213413	0.213818	0.210094
3	DOP2_MOUSE|Q3UHQ6_S556	0.20143	0.221274	0.206285	0.212288	0.216168	0.216581	0.213553	0.211716	0.214002	0.211567	0.210944	0.207998	0.210908	0.210839	0.216048	0.222079	0.214211	0.211581	0.219007	0.215347	0.212038	0.213494	0.212831	0.214853	0.216354	0.209676	0.213415	0.211048	0.212574	0.211053	0.211294	0.211678	0.211737	0.214754	0.214659	0.213605	0.21324	0.215522	0.213347	0.213389	0.213613	0.214238	0.213371	0.214035
3	DOP2_MOUSE|Q3UHQ6_S597	0.206581	0.21107	0.205853	0.212277	0.215081	0.210143	0.209243	0.214071	0.215572	0.216773	0.217436	0.210687	0.212005	0.204859	0.215581	0.213039	0.212005	0.215248	0.21828	0.214665	0.217024	0.222034	0.212831	0.214853	0.216354	0.209676	0.213415	0.211048	0.212574	0.211053	0.211294	0.211678	0.211737	0.214754	0.214659	0.213605	0.21324	0.215522	0.213347	0.213389	0.213613	0.214238	0.213371	0.214035
3	DPOA2_MOUSE|P33611_S126	0.209258	0.210106	0.208914	0.216962	0.218017	0.218393	0.218635	0.220025	0.222212	0.216252	0.220702	0.203053	0.208409	0.208513	0.209264	0.21469	0.214198	0.211614	0.209626	0.212791	0.208372	0.209112	0.216706	0.21326	0.217857	0.216466	0.216519	0.215394	0.216648	0.215398	0.21589	0.216506	0.215896	0.212062	0.210135	0.211753	0.210755	0.208858	0.20887	0.210422	0.208418	0.20989	0.209803	0.212411
3	DPOLA_MOUSE|P33609_S215	0.211143	0.212196	0.212236	0.218239	0.219199	0.219453	0.217321	0.216065	0.215497	0.215312	0.213449	0.206889	0.206128	0.208842	0.21357	0.213237	0.214075	0.215519	0.211701	0.210143	0.209067	0.210448	0.21598	0.218458	0.22179	0.215179	0.215661	0.216967	0.213991	0.21532	0.21439	0.215354	0.214017	0.212005	0.210703	0.210312	0.21026	0.209322	0.208482	0.211526	0.211079	0.209469	0.209188	0.21037
3	E2F8_MOUSE|Q58FA4_S416	0.2085	0.208691	0.208716	0.218997	0.215429	0.21913	0.217841	0.217447	0.215266	0.217438	0.218857	0.208324	0.209218	0.212243	0.211898	0.212253	0.208167	0.210042	0.214191	0.213558	0.209841	0.213615	0.214161	0.208003	0.218399	0.217436	0.215061	0.213516	0.213552	0.21561	0.212175	0.212202	0.213855	0.213326	0.214326	0.21315	0.20787	0.20938	0.211622	0.214729	0.211273	0.21239	0.213704	0.214349
3	E41L1_MOUSE|Q9Z2H5_S541_S544	0.20603	0.213561	0.212962	0.214516	0.216634	0.2132	0.211514	0.211099	0.213189	0.213086	0.208392	0.21017	0.213067	0.217242	0.215942	0.217616	0.213736	0.215355	0.211474	0.215335	0.213416	0.2125	0.21128	0.210155	0.213649	0.21106	0.213104	0.210996	0.212064	0.210112	0.212019	0.212162	0.212246	0.213825	0.216093	0.215548	0.213981	0.216779	0.213823	0.214861	0.212466	0.215616	0.212792	0.215597
3	E5D6T0_MOUSE|E5D6T0_S1048	0.206673	0.21479	0.206714	0.215427	0.215856	0.216056	0.213432	0.214261	0.216397	0.212836	0.212421	0.20608	0.208422	0.203466	0.215354	0.214658	0.217543	0.216518	0.216139	0.216383	0.215478	0.214689	0.214812	0.222232	0.217895	0.213478	0.212215	0.213641	0.209712	0.214576	0.213332	0.212588	0.207869	0.213082	0.212667	0.206038	0.212373	0.212455	0.215548	0.214371	0.21086	0.21249	0.214337	0.213336
3	E9PVP1_MOUSE|E9PVP1_S652_T655	0.213208	0.210694	0.208629	0.210655	0.219249	0.219736	0.217014	0.21247	0.211	0.21406	0.214972	0.209815	0.204886	0.202982	0.216458	0.223182	0.221806	0.217726	0.214521	0.207196	0.208814	0.209952	0.211533	0.214407	0.215586	0.21258	0.212927	0.21158	0.213478	0.21272	0.212272	0.212855	0.214099	0.214197	0.213691	0.212871	0.214228	0.213844	0.211384	0.213204	0.213414	0.212821	0.21153	0.21513
3	E9PVP1_MOUSE|E9PVP1_T655	0.208787	0.214055	0.214158	0.210554	0.213234	0.214047	0.212646	0.212255	0.213232	0.21461	0.215675	0.211197	0.207495	0.212535	0.215647	0.218707	0.214068	0.212675	0.216207	0.214413	0.211823	0.2121	0.211533	0.214407	0.215586	0.21258	0.212927	0.21158	0.213478	0.21272	0.212272	0.212855	0.214099	0.214197	0.213691	0.212871	0.214228	0.213844	0.211384	0.213204	0.213414	0.212821	0.21153	0.21513
3	E9PYP2_MOUSE|E9PYP2_S1401	0.209193	0.209624	0.209457	0.214634	0.213777	0.218933	0.217863	0.213011	0.21076	0.217276	0.216954	0.210439	0.212384	0.209519	0.214362	0.216894	0.212454	0.210532	0.214516	0.216457	0.210742	0.210146	0.212151	0.215867	0.217146	0.214381	0.211242	0.213493	0.213578	0.21131	0.212675	0.212752	0.214512	0.213253	0.213468	0.211583	0.21343	0.213373	0.212367	0.211237	0.214301	0.21373	0.211419	0.213037
3	E9PZP8_MOUSE|E9PZP8_S1406	0.208814	0.213619	0.209595	0.215986	0.215276	0.21411	0.213639	0.215558	0.212531	0.215594	0.213273	0.210227	0.210379	0.211286	0.21284	0.214768	0.214164	0.213879	0.213501	0.215615	0.211792	0.213758	0.213835	0.215986	0.214658	0.213767	0.213813	0.21312	0.211841	0.212465	0.216123	0.213273	0.213122	0.212419	0.212734	0.212605	0.211631	0.210278	0.212145	0.21217	0.21449	0.212646	0.213335	0.213871
3	E9Q1M6_MOUSE|E9Q1M6_S1612	0.209746	0.211477	0.202211	0.216498	0.211854	0.212272	0.208716	0.213466	0.211651	0.21172	0.209758	0.209225	0.212296	0.212293	0.216624	0.215497	0.217999	0.215717	0.217659	0.215337	0.219685	0.217921	0.213682	0.212344	0.215423	0.213718	0.21362	0.21398	0.212527	0.213846	0.211983	0.213475	0.211566	0.213741	0.212665	0.215701	0.213988	0.212847	0.213659	0.212632	0.211841	0.211869	0.212187	0.213063
3	E9Q2I4_MOUSE|E9Q2I4_S456	0.207993	0.212171	0.212997	0.215279	0.215457	0.213781	0.21457	0.213555	0.214285	0.213303	0.216566	0.208066	0.209908	0.211538	0.214301	0.214869	0.213453	0.213415	0.215292	0.214535	0.213108	0.211725	0.214739	0.211406	0.216957	0.21378	0.213828	0.21488	0.212224	0.212493	0.216187	0.212598	0.212343	0.210783	0.210717	0.211845	0.212757	0.212394	0.21438	0.214019	0.213533	0.21081	0.214161	0.213447
3	E9Q2I4_MOUSE|E9Q2I4_S628	0.208142	0.21152	0.211448	0.215334	0.218302	0.214596	0.21389	0.214071	0.218249	0.213368	0.212673	0.205673	0.211821	0.213738	0.214404	0.212169	0.213807	0.21439	0.213254	0.213792	0.21263	0.212781	0.214739	0.211406	0.216957	0.21378	0.213828	0.21488	0.212224	0.212493	0.216187	0.212598	0.212343	0.210783	0.210717	0.211845	0.212757	0.212394	0.21438	0.214019	0.213533	0.21081	0.214161	0.213447
3	E9Q3G8_MOUSE|E9Q3G8_S335	0.207275	0.206885	0.208096	0.217225	0.217226	0.217362	0.217431	0.21461	0.214005	0.21148	0.213615	0.207461	0.207917	0.209121	0.215694	0.21654	0.217353	0.218211	0.216231	0.21055	0.213109	0.21225	0.214807	0.213178	0.215827	0.214283	0.215283	0.215214	0.213607	0.215428	0.213233	0.212832	0.212999	0.21191	0.211954	0.212563	0.20949	0.211944	0.213108	0.213458	0.212748	0.212135	0.212275	0.212026
3	E9Q4K7_MOUSE|E9Q4K7_S1399	0.206727	0.211248	0.209874	0.208991	0.220226	0.211804	0.212657	0.210482	0.213883	0.212934	0.213578	0.21968	0.213056	0.214433	0.215091	0.218253	0.213717	0.21674	0.206024	0.214059	0.211339	0.214966	0.212071	0.211123	0.215856	0.212757	0.213517	0.213171	0.215042	0.211968	0.212729	0.213705	0.214232	0.213297	0.213531	0.214075	0.214027	0.214308	0.211749	0.213131	0.213087	0.21272	0.211233	0.21302
3	E9Q4K7_MOUSE|E9Q4K7_S911	0.210056	0.217175	0.217797	0.211908	0.21499	0.215199	0.213773	0.211261	0.213153	0.216922	0.213932	0.206258	0.211435	0.208454	0.215466	0.215267	0.208949	0.207553	0.217951	0.214009	0.214639	0.213721	0.212071	0.211123	0.215856	0.212757	0.213517	0.213171	0.215042	0.211968	0.212729	0.213705	0.214232	0.213297	0.213531	0.214075	0.214027	0.214308	0.211749	0.213131	0.213087	0.21272	0.211233	0.21302
3	E9Q4Y4_MOUSE|E9Q4Y4_S607	0.209136	0.212286	0.204044	0.216439	0.217595	0.211406	0.212848	0.212969	0.213425	0.212274	0.212615	0.206308	0.205964	0.211607	0.215568	0.220623	0.220217	0.216367	0.214602	0.213106	0.21608	0.214071	0.213984	0.210382	0.219226	0.21413	0.214497	0.212316	0.213635	0.214858	0.212399	0.212788	0.2124	0.213107	0.212923	0.215535	0.211125	0.210902	0.211365	0.213073	0.212298	0.211745	0.213355	0.214195
3	E9Q616_MOUSE|E9Q616_S565	0.212153	0.21153	0.209785	0.214611	0.212753	0.213968	0.213742	0.214182	0.208451	0.213309	0.213768	0.21733	0.210984	0.213172	0.212997	0.221105	0.214943	0.215361	0.208652	0.212403	0.212379	0.212468	0.213183	0.211449	0.215784	0.213787	0.215694	0.213998	0.214109	0.213072	0.216564	0.213875	0.214333	0.212495	0.212232	0.213192	0.211695	0.211768	0.211223	0.2139	0.210841	0.212042	0.211854	0.213208
3	E9Q616_MOUSE|E9Q616_T4342	0.204115	0.213624	0.210427	0.212184	0.216439	0.220749	0.219571	0.206817	0.211003	0.211172	0.211614	0.209639	0.211987	0.206596	0.217468	0.222446	0.214599	0.216868	0.215211	0.218101	0.207729	0.210902	0.213183	0.211449	0.215784	0.213787	0.215694	0.213998	0.214109	0.213072	0.216564	0.213875	0.214333	0.212495	0.212232	0.213192	0.211695	0.211768	0.211223	0.2139	0.210841	0.212042	0.211854	0.213208
3	E9Q7E2_MOUSE|E9Q7E2_S631	0.209362	0.208984	0.207673	0.215061	0.220781	0.215235	0.21534	0.210504	0.210553	0.212419	0.214125	0.208876	0.21039	0.207912	0.21664	0.220199	0.218503	0.216813	0.213775	0.210053	0.214307	0.212166	0.213484	0.212879	0.217639	0.211098	0.215774	0.214836	0.214957	0.212742	0.213662	0.211603	0.216252	0.213947	0.215634	0.206902	0.215897	0.208017	0.212046	0.211844	0.210779	0.213009	0.21313	0.213961
3	E9Q8V6_MOUSE|E9Q8V6_S1151	0.208193	0.20847	0.211091	0.213473	0.212965	0.215785	0.214333	0.215965	0.219173	0.215813	0.217493	0.209077	0.213162	0.2097	0.211903	0.211267	0.211291	0.213409	0.215042	0.215813	0.213546	0.213034	0.210441	0.215214	0.216426	0.211481	0.212416	0.208264	0.209445	0.21485	0.214117	0.215004	0.218021	0.211207	0.211477	0.211025	0.213401	0.210878	0.211901	0.212695	0.215754	0.216551	0.214356	0.215173
3	E9Q8V6_MOUSE|E9Q8V6_S1586	0.205238	0.209509	0.202649	0.211716	0.212255	0.215826	0.213393	0.211537	0.211098	0.214068	0.214564	0.212501	0.210176	0.213749	0.21695	0.221229	0.217055	0.212491	0.216683	0.219165	0.213128	0.214589	0.210441	0.215214	0.216426	0.211481	0.212416	0.208264	0.209445	0.21485	0.214117	0.215004	0.218021	0.211207	0.211477	0.211025	0.213401	0.210878	0.211901	0.212695	0.215754	0.216551	0.214356	0.215173
3	EAF1_MOUSE|Q9D4C5_S165	0.211748	0.204277	0.214143	0.213405	0.211414	0.214822	0.216268	0.213122	0.211245	0.214701	0.215059	0.212181	0.213511	0.207838	0.214731	0.214782	0.217665	0.207899	0.215003	0.213497	0.217473	0.215126	0.212069	0.209109	0.212753	0.21396	0.209503	0.21402	0.212567	0.214599	0.211909	0.212526	0.213719	0.213972	0.214948	0.214345	0.213868	0.214942	0.213122	0.213012	0.212644	0.213833	0.214155	0.214723
3	EF1D_MOUSE|P57776_S70	0.209582	0.204477	0.20775	0.21253	0.214818	0.218102	0.215643	0.213007	0.212396	0.209031	0.211058	0.211432	0.210542	0.212615	0.217873	0.217158	0.217947	0.216673	0.213604	0.21335	0.214385	0.21582	0.212938	0.207949	0.213837	0.214362	0.213289	0.214067	0.213066	0.213329	0.21155	0.212675	0.21322	0.213267	0.212576	0.216648	0.214479	0.214574	0.214354	0.21228	0.211631	0.212518	0.213417	0.214261
3	EHMT2_MOUSE|Q9Z148_T608	0.208085	0.210085	0.206946	0.217396	0.218886	0.216802	0.21835	0.213378	0.216577	0.216459	0.215715	0.20573	0.205984	0.206185	0.215051	0.215207	0.215651	0.212411	0.215091	0.212911	0.213632	0.213021	0.213826	0.214924	0.215466	0.214959	0.21462	0.21468	0.2137	0.213438	0.214217	0.216578	0.212859	0.212916	0.210928	0.212939	0.212833	0.211195	0.213061	0.207783	0.211838	0.212081	0.214086	0.211313
3	EIF3A_MOUSE|P23116_S1008	0.212139	0.211919	0.205858	0.21386	0.212847	0.213016	0.213227	0.214491	0.213995	0.214982	0.213278	0.211466	0.210026	0.211976	0.214146	0.214565	0.214539	0.213861	0.215821	0.213821	0.214386	0.215967	0.212947	0.211772	0.213546	0.214254	0.21288	0.213013	0.213686	0.213386	0.213105	0.211953	0.213143	0.213112	0.212789	0.21346	0.212739	0.213126	0.214121	0.214381	0.213187	0.213295	0.213915	0.212587
3	EIF3G_MOUSE|Q9Z1D1_T41	0.216762	0.20869	0.211977	0.216425	0.217548	0.21285	0.214158	0.209514	0.206064	0.214893	0.214288	0.212838	0.206376	0.218867	0.212855	0.218722	0.211275	0.213388	0.210779	0.214227	0.213642	0.213682	0.213597	0.210884	0.215901	0.213891	0.21253	0.214106	0.214265	0.211841	0.212394	0.214072	0.213823	0.213298	0.213145	0.213981	0.214226	0.213881	0.212132	0.212716	0.212127	0.212866	0.211205	0.213469
3	ELMO1_MOUSE|Q8BPU7_S344	0.209083	0.210669	0.209293	0.215472	0.219663	0.218928	0.216705	0.210664	0.212512	0.211648	0.210938	0.210925	0.212266	0.211931	0.214998	0.216541	0.217062	0.215463	0.214042	0.21028	0.211013	0.209822	0.213332	0.213211	0.217284	0.214059	0.214172	0.213526	0.21463	0.213692	0.214232	0.216029	0.21528	0.21271	0.213957	0.212765	0.212144	0.212309	0.209927	0.21315	0.210971	0.211885	0.209873	0.211113
3	ELYS_MOUSE|Q8CJF7_S1931	0.205064	0.216918	0.211288	0.214669	0.213261	0.215326	0.213556	0.216839	0.212811	0.212371	0.210198	0.208634	0.211792	0.202984	0.215589	0.212693	0.216782	0.214484	0.217538	0.216215	0.216819	0.213876	0.213064	0.221729	0.217927	0.211937	0.21304	0.213507	0.209204	0.213841	0.2117	0.211039	0.209824	0.211946	0.213738	0.208427	0.212401	0.212084	0.213269	0.21359	0.214817	0.214351	0.214633	0.213961
3	EMAL4_MOUSE|Q3UMY5_S132	0.208044	0.214297	0.210453	0.212248	0.211601	0.208776	0.209206	0.218451	0.219269	0.217735	0.21702	0.205641	0.210195	0.208373	0.210838	0.209189	0.214085	0.210882	0.219629	0.219503	0.217015	0.217027	0.214406	0.218595	0.216454	0.212762	0.213384	0.214617	0.21192	0.21334	0.213508	0.212924	0.212396	0.211784	0.212703	0.21058	0.212201	0.213832	0.21273	0.213028	0.212271	0.21307	0.212289	0.21148
3	EMD_MOUSE|O08579_S124	0.207457	0.216873	0.210118	0.213264	0.213692	0.215655	0.214887	0.210186	0.211458	0.211465	0.212847	0.210946	0.208239	0.205022	0.213746	0.222119	0.218031	0.215159	0.216103	0.216698	0.213973	0.211756	0.214514	0.217904	0.217615	0.213811	0.212819	0.21332	0.209672	0.213665	0.211604	0.212053	0.210631	0.212505	0.215057	0.210736	0.213095	0.211728	0.213523	0.214154	0.212747	0.212288	0.214121	0.21266
3	EP15R_MOUSE|Q60902_S229	0.205902	0.205333	0.206175	0.212735	0.213093	0.214471	0.213326	0.215214	0.215519	0.215923	0.213572	0.209437	0.213956	0.212309	0.214523	0.216204	0.21529	0.21221	0.215505	0.216713	0.214892	0.217519	0.215094	0.210315	0.213023	0.212715	0.212234	0.212998	0.213216	0.212645	0.213092	0.214282	0.212273	0.214148	0.213637	0.215711	0.213164	0.214081	0.214257	0.210917	0.212472	0.212194	0.213759	0.21411
3	EPS8_MOUSE|Q08509_S658	0.206116	0.210775	0.2131	0.213867	0.220529	0.214821	0.214814	0.212858	0.221925	0.214153	0.213375	0.205255	0.208316	0.214262	0.212841	0.214118	0.212079	0.215351	0.211639	0.214996	0.21006	0.214453	0.212737	0.211907	0.216452	0.213231	0.219159	0.212461	0.213307	0.212375	0.219418	0.213365	0.213286	0.211335	0.211423	0.21467	0.21089	0.211388	0.211368	0.215038	0.211041	0.209529	0.210384	0.21532
3	EPS8_MOUSE|Q08509_S659	0.209052	0.212484	0.214518	0.214112	0.219416	0.210703	0.214132	0.21322	0.222031	0.214347	0.214729	0.206567	0.207648	0.213562	0.211801	0.213434	0.211693	0.213729	0.210357	0.213854	0.214363	0.214104	0.212737	0.211907	0.216452	0.213231	0.219159	0.212461	0.213307	0.212375	0.219418	0.213365	0.213286	0.211335	0.211423	0.21467	0.21089	0.211388	0.211368	0.215038	0.211041	0.209529	0.210384	0.21532
3	ESIP1_MOUSE|Q8VDI1_S39	0.204905	0.211199	0.210876	0.213178	0.217064	0.210821	0.212294	0.211027	0.215816	0.206964	0.209123	0.205473	0.204082	0.219091	0.217302	0.220539	0.220027	0.219897	0.214389	0.217421	0.214007	0.213688	0.215546	0.214544	0.218331	0.210655	0.210554	0.207905	0.2081	0.211272	0.213249	0.20816	0.208736	0.216403	0.215407	0.218715	0.212362	0.213067	0.217499	0.215448	0.210445	0.214514	0.214781	0.214177
3	ETHE1_MOUSE|Q9DCM0_S14	0.208692	0.209016	0.211314	0.215656	0.217357	0.212913	0.213675	0.217133	0.218045	0.213359	0.218025	0.204323	0.207627	0.216193	0.212709	0.213609	0.21428	0.212551	0.213349	0.214569	0.213221	0.212211	0.214927	0.211015	0.211222	0.214773	0.214996	0.214292	0.21311	0.214011	0.214393	0.214305	0.213135	0.211166	0.216533	0.215417	0.211924	0.212096	0.211245	0.209793	0.209085	0.213863	0.21506	0.213862
3	EXOC4_MOUSE|O35382_S226	0.207035	0.217828	0.207656	0.213806	0.208908	0.20993	0.209257	0.211607	0.210689	0.212999	0.211469	0.205289	0.214669	0.211668	0.2163	0.220297	0.216374	0.214643	0.219954	0.219706	0.216786	0.212639	0.212062	0.214762	0.217228	0.213347	0.212923	0.211435	0.212536	0.2127	0.211205	0.21098	0.211709	0.213028	0.213009	0.213856	0.213976	0.213727	0.213881	0.214881	0.213056	0.214019	0.213417	0.212585
3	EXOS2_MOUSE|Q8VBV3_S124	0.20911	0.210305	0.20994	0.21489	0.217948	0.212945	0.215472	0.218055	0.220048	0.218121	0.220341	0.203597	0.20169	0.206851	0.211069	0.211481	0.21173	0.211425	0.216069	0.216511	0.216859	0.214729	0.21107	0.212909	0.21599	0.212765	0.216303	0.213229	0.217693	0.21369	0.214711	0.213469	0.216093	0.212748	0.212113	0.214781	0.214064	0.210611	0.207273	0.210512	0.213951	0.211107	0.213639	0.211422
3	F120A_MOUSE|Q6A0A9_S415	0.216603	0.206579	0.201247	0.214613	0.22084	0.223672	0.218497	0.213179	0.219944	0.211438	0.214699	0.210666	0.211542	0.201169	0.20799	0.213638	0.22146	0.220539	0.209155	0.21125	0.208133	0.211693	0.212499	0.215685	0.212936	0.213154	0.212841	0.214187	0.212599	0.212182	0.21332	0.21249	0.21149	0.214225	0.214276	0.21265	0.213807	0.213421	0.213847	0.212697	0.212129	0.214003	0.212532	0.213403
3	F133B_MOUSE|Q9CVI2_S82	0.213495	0.211088	0.210436	0.214879	0.214897	0.216964	0.213261	0.214631	0.216114	0.2128	0.213586	0.211736	0.211135	0.214522	0.211527	0.21252	0.215618	0.212799	0.21191	0.212636	0.211156	0.212549	0.216226	0.206367	0.216539	0.215204	0.213486	0.213897	0.21065	0.214488	0.21143	0.212664	0.212301	0.219279	0.212571	0.215818	0.207638	0.212237	0.214375	0.216655	0.209438	0.210996	0.212578	0.215118
3	F206A_MOUSE|Q80ZQ9_T192	0.210573	0.214889	0.200767	0.215358	0.214172	0.211054	0.209332	0.215529	0.210552	0.214795	0.209667	0.209569	0.209514	0.219387	0.21525	0.218515	0.21412	0.213552	0.213386	0.216751	0.217711	0.215147	0.216881	0.215678	0.212456	0.213227	0.211998	0.212231	0.205364	0.213983	0.21146	0.206195	0.216057	0.217308	0.214043	0.213604	0.215022	0.214702	0.216329	0.209762	0.203461	0.213518	0.219874	0.216465
3	F207A_MOUSE|P58468_S38	0.208778	0.214944	0.211763	0.214241	0.21566	0.21852	0.214107	0.212093	0.209708	0.212221	0.21019	0.209555	0.208829	0.209333	0.216695	0.219772	0.218561	0.217143	0.214988	0.213119	0.210354	0.209236	0.21289	0.219429	0.215074	0.213339	0.211599	0.213925	0.20815	0.213534	0.211911	0.210417	0.208795	0.213246	0.214515	0.216212	0.214165	0.212459	0.214258	0.212327	0.213996	0.213137	0.213049	0.213715
3	F2Z3U3_MOUSE|F2Z3U3_S1027	0.211673	0.211602	0.209507	0.216845	0.215889	0.213931	0.212816	0.2174	0.216758	0.21617	0.214188	0.207036	0.206313	0.210532	0.213663	0.212599	0.214641	0.214281	0.212873	0.212346	0.215496	0.213426	0.21538	0.211793	0.21868	0.216399	0.215503	0.214356	0.214918	0.215971	0.215041	0.214398	0.214067	0.210934	0.211201	0.211523	0.211121	0.211303	0.212645	0.213792	0.209779	0.208681	0.210114	0.212505
3	F2Z3U3_MOUSE|F2Z3U3_S1169	0.206286	0.211522	0.209708	0.217272	0.215322	0.209745	0.211445	0.214822	0.215835	0.211376	0.212391	0.204379	0.204996	0.215128	0.216627	0.217124	0.215035	0.216557	0.215656	0.214127	0.218633	0.21562	0.21538	0.211793	0.21868	0.216399	0.215503	0.214356	0.214918	0.215971	0.215041	0.214398	0.214067	0.210934	0.211201	0.211523	0.211121	0.211303	0.212645	0.213792	0.209779	0.208681	0.210114	0.212505
3	F2Z3U3_MOUSE|F2Z3U3_T1168	0.205619	0.210215	0.206267	0.216752	0.21452	0.218922	0.218107	0.213884	0.215098	0.214465	0.214149	0.206423	0.205747	0.205824	0.216301	0.217213	0.216822	0.214783	0.218165	0.214728	0.214783	0.210634	0.21538	0.211793	0.21868	0.216399	0.215503	0.214356	0.214918	0.215971	0.215041	0.214398	0.214067	0.210934	0.211201	0.211523	0.211121	0.211303	0.212645	0.213792	0.209779	0.208681	0.210114	0.212505
3	FADD_MOUSE|Q61160_T204	0.213378	0.209613	0.211806	0.214324	0.215285	0.214935	0.21556	0.214905	0.21609	0.215771	0.215715	0.207672	0.20745	0.213038	0.213131	0.21384	0.213889	0.212519	0.213126	0.213687	0.211871	0.212527	0.215687	0.209631	0.211025	0.216953	0.215032	0.214165	0.215485	0.212801	0.213338	0.215246	0.213649	0.211868	0.212079	0.215559	0.211382	0.214862	0.21388	0.213017	0.211301	0.210331	0.211622	0.211303
3	FAK1_MOUSE|P34152_S948	0.205089	0.2084	0.209514	0.213033	0.214471	0.215138	0.213914	0.212838	0.215271	0.215039	0.216486	0.207212	0.212771	0.209569	0.215043	0.215473	0.213208	0.213214	0.216728	0.218632	0.212522	0.216298	0.213017	0.213209	0.217332	0.212998	0.214627	0.214006	0.214648	0.212392	0.213615	0.21289	0.213969	0.213046	0.214033	0.213138	0.21131	0.213643	0.210184	0.21273	0.211392	0.213429	0.210429	0.214265
3	FAS_MOUSE|P19096_S207	0.21298	0.215512	0.201886	0.216828	0.213986	0.217365	0.213343	0.216093	0.212547	0.219179	0.212371	0.210641	0.208895	0.214533	0.21513	0.213797	0.211922	0.208845	0.214694	0.212811	0.213151	0.213287	0.21524	0.215872	0.215675	0.215248	0.215235	0.216066	0.215109	0.21389	0.213759	0.215727	0.214687	0.211752	0.21079	0.210912	0.212353	0.212064	0.210322	0.212412	0.211715	0.210605	0.209503	0.211252
3	FBRL_MOUSE|P35550_S130	0.208112	0.21352	0.210337	0.216183	0.21226	0.213149	0.211485	0.217625	0.212022	0.212773	0.211365	0.207049	0.212212	0.213366	0.21426	0.21571	0.215586	0.214989	0.214501	0.216051	0.214375	0.213163	0.21369	0.214399	0.215248	0.213754	0.212676	0.215101	0.213803	0.213719	0.211849	0.214757	0.214452	0.21307	0.213004	0.209941	0.213306	0.213225	0.213142	0.21065	0.212579	0.213169	0.211355	0.213438
3	FBX38_MOUSE|Q8BMI0_S882	0.209717	0.214067	0.212087	0.215403	0.218013	0.218293	0.215329	0.21153	0.21419	0.212201	0.209028	0.207884	0.20548	0.211914	0.215597	0.218605	0.215781	0.216195	0.212425	0.212775	0.210852	0.212481	0.213764	0.218197	0.214836	0.212671	0.214405	0.209776	0.210707	0.211444	0.213448	0.211246	0.211206	0.214503	0.212805	0.21403	0.212892	0.212797	0.213499	0.214029	0.212552	0.212831	0.215567	0.213051
3	FCHO2_MOUSE|Q3UQN2_S487_S495	0.209149	0.202167	0.209255	0.212907	0.208934	0.215717	0.215373	0.215043	0.21722	0.213395	0.216928	0.208249	0.20943	0.210534	0.216513	0.214921	0.214998	0.21416	0.218433	0.214114	0.216754	0.215456	0.213386	0.211071	0.208883	0.214151	0.213976	0.211608	0.212766	0.212663	0.214072	0.211615	0.21366	0.214047	0.213114	0.217818	0.212168	0.214841	0.214429	0.212617	0.212287	0.212543	0.214615	0.213936
3	FES_MOUSE|P16879_T421	0.207825	0.214742	0.208301	0.209457	0.211062	0.21003	0.21176	0.208128	0.210003	0.21186	0.211976	0.215902	0.206388	0.213768	0.217883	0.221522	0.218092	0.214104	0.218302	0.217364	0.213858	0.217257	0.212881	0.212189	0.217774	0.212706	0.214115	0.212622	0.214456	0.213244	0.213679	0.212239	0.213125	0.213743	0.213006	0.213984	0.212446	0.213347	0.212387	0.213629	0.211346	0.212272	0.212064	0.213082
3	FGD4_MOUSE|Q91ZT5_S702	0.207655	0.207467	0.210699	0.214574	0.214305	0.213185	0.215772	0.212939	0.216018	0.215719	0.216936	0.208921	0.209564	0.209853	0.214598	0.215838	0.213957	0.212034	0.215479	0.214543	0.214514	0.215435	0.215509	0.214346	0.215881	0.214819	0.216746	0.214263	0.215014	0.213482	0.215893	0.214698	0.213574	0.212418	0.210971	0.213019	0.211469	0.212459	0.213012	0.212365	0.208918	0.209957	0.210192	0.211189
3	FHOD1_MOUSE|Q6P9Q4_S390	0.207583	0.207377	0.210235	0.210622	0.220828	0.219035	0.211934	0.210392	0.203699	0.216683	0.212945	0.209035	0.213305	0.213319	0.219637	0.21456	0.221683	0.204099	0.218463	0.21797	0.211914	0.2138	0.213727	0.215229	0.214235	0.21173	0.213086	0.211988	0.211489	0.211404	0.211194	0.210214	0.211008	0.215215	0.214647	0.214987	0.213666	0.213619	0.21422	0.214326	0.213254	0.213816	0.214538	0.212712
3	FHOD1_MOUSE|Q6P9Q4_S527	0.210141	0.211947	0.214299	0.212821	0.212195	0.213631	0.216301	0.212512	0.214226	0.214584	0.215165	0.210126	0.213645	0.211553	0.213036	0.214936	0.214152	0.210966	0.214641	0.216515	0.212443	0.210407	0.213727	0.215229	0.214235	0.21173	0.213086	0.211988	0.211489	0.211404	0.211194	0.210214	0.211008	0.215215	0.214647	0.214987	0.213666	0.213619	0.21422	0.214326	0.213254	0.213816	0.214538	0.212712
3	FKB15_MOUSE|Q6P9Q6_S1190	0.212035	0.204949	0.210827	0.211287	0.214821	0.215238	0.217303	0.208099	0.210041	0.212593	0.212866	0.214749	0.215394	0.213894	0.215209	0.217128	0.216993	0.21385	0.213956	0.214551	0.21338	0.21081	0.212424	0.208128	0.215396	0.212503	0.212425	0.212236	0.213772	0.211134	0.212629	0.214001	0.212006	0.214939	0.213848	0.216029	0.214398	0.215787	0.21337	0.212831	0.212198	0.212074	0.213822	0.214317
3	FKBPL_MOUSE|O35450_S38	0.211719	0.208335	0.208017	0.213141	0.215543	0.214156	0.214483	0.207779	0.211411	0.211085	0.210919	0.207805	0.207387	0.210706	0.21842	0.222564	0.222845	0.218236	0.214398	0.214246	0.213627	0.212634	0.215027	0.207374	0.212539	0.212228	0.211131	0.212603	0.213055	0.213006	0.215014	0.21225	0.213469	0.212853	0.212313	0.213871	0.216684	0.2117	0.215975	0.214857	0.211863	0.213181	0.213781	0.215451
3	FLNA_MOUSE|Q8BTM8_S16	0.214973	0.212961	0.210337	0.214267	0.21581	0.217593	0.216473	0.212081	0.210964	0.217687	0.214895	0.211841	0.208622	0.209384	0.215041	0.216306	0.213522	0.213069	0.213183	0.211071	0.207884	0.212069	0.21256	0.209953	0.213797	0.21383	0.213362	0.214254	0.214936	0.213165	0.212439	0.213558	0.214546	0.213028	0.212811	0.213151	0.213998	0.212906	0.211844	0.213356	0.21379	0.212801	0.212575	0.213705
3	FLNA_MOUSE|Q8BTM8_S2152	0.207317	0.20656	0.203501	0.213897	0.214317	0.21647	0.215683	0.213549	0.209328	0.213046	0.214485	0.211541	0.213404	0.209231	0.216918	0.217894	0.216718	0.213329	0.216703	0.21494	0.215663	0.215217	0.21256	0.209953	0.213797	0.21383	0.213362	0.214254	0.214936	0.213165	0.212439	0.213558	0.214546	0.213028	0.212811	0.213151	0.213998	0.212906	0.211844	0.213356	0.21379	0.212801	0.212575	0.213705
3	FOXJ2_MOUSE|Q9ES18_S46	0.21344	0.207583	0.205387	0.214039	0.215352	0.21791	0.217178	0.212218	0.210415	0.216314	0.213102	0.214709	0.208835	0.213853	0.216808	0.215926	0.215989	0.211527	0.214609	0.210324	0.212312	0.212072	0.214694	0.20724	0.216265	0.215321	0.216334	0.216275	0.212691	0.216026	0.217013	0.213358	0.2133	0.211031	0.209929	0.217262	0.210878	0.211639	0.214926	0.214141	0.207322	0.211639	0.210793	0.211912
3	FOXK2_MOUSE|Q3UCQ1_S526	0.211828	0.210623	0.209456	0.215577	0.217302	0.219193	0.216618	0.212153	0.211162	0.212748	0.212055	0.212002	0.210287	0.211104	0.213859	0.22025	0.21764	0.214916	0.211654	0.209286	0.21011	0.210067	0.21192	0.210039	0.213749	0.214855	0.213858	0.213777	0.212987	0.21341	0.212026	0.214887	0.212267	0.214113	0.212724	0.214328	0.214286	0.212199	0.212279	0.214178	0.212654	0.212618	0.213009	0.214187
3	FOXO3_MOUSE|Q9WVH4_T426	0.20623	0.205728	0.210065	0.217754	0.217659	0.218662	0.217646	0.214702	0.211051	0.21342	0.216596	0.205898	0.209483	0.211487	0.218338	0.219147	0.216968	0.21574	0.213714	0.210457	0.209451	0.209253	0.220125	0.208796	0.221308	0.216765	0.22081	0.216683	0.215926	0.21103	0.211137	0.210468	0.208609	0.213228	0.210834	0.217956	0.212943	0.21501	0.21634	0.214763	0.203563	0.203907	0.212322	0.206655
3	FRM4A_MOUSE|Q8BIE6_S666	0.202552	0.218861	0.211143	0.205948	0.219594	0.215754	0.204127	0.209888	0.210206	0.215557	0.211017	0.220549	0.208989	0.213598	0.216277	0.22506	0.218951	0.219066	0.207415	0.216757	0.205164	0.212154	0.213448	0.212678	0.216929	0.211014	0.211693	0.209633	0.21069	0.211682	0.213522	0.208942	0.211918	0.215792	0.215539	0.216332	0.212571	0.21229	0.213566	0.213806	0.212318	0.214522	0.214802	0.216487
3	FRM4A_MOUSE|Q8BIE6_S880	0.210838	0.20681	0.210003	0.212092	0.217874	0.217616	0.217664	0.211096	0.213628	0.213826	0.213184	0.211873	0.214884	0.212057	0.211557	0.217903	0.215663	0.213269	0.211429	0.21427	0.210632	0.211841	0.213448	0.212678	0.216929	0.211014	0.211693	0.209633	0.21069	0.211682	0.213522	0.208942	0.211918	0.215792	0.215539	0.216332	0.212571	0.21229	0.213566	0.213806	0.212318	0.214522	0.214802	0.216487
3	FRMD8_MOUSE|Q3UFK8_S21	0.207343	0.210083	0.217985	0.213396	0.214607	0.214261	0.215022	0.212119	0.21258	0.214831	0.215292	0.210861	0.211763	0.213707	0.21473	0.21633	0.211231	0.214237	0.213521	0.214695	0.208835	0.212684	0.212537	0.212576	0.21214	0.213695	0.212007	0.212523	0.212578	0.212195	0.212212	0.211649	0.212825	0.214904	0.215208	0.216727	0.214314	0.212864	0.213726	0.210628	0.212274	0.214483	0.213548	0.214704
3	FRMD8_MOUSE|Q3UFK8_S440	0.207057	0.209616	0.209156	0.214646	0.218065	0.213862	0.215314	0.214564	0.215224	0.21676	0.21497	0.209064	0.210049	0.212821	0.212593	0.215731	0.211798	0.213472	0.21322	0.215253	0.212374	0.214429	0.212537	0.212576	0.21214	0.213695	0.212007	0.212523	0.212578	0.212195	0.212212	0.211649	0.212825	0.214904	0.215208	0.216727	0.214314	0.212864	0.213726	0.210628	0.212274	0.214483	0.213548	0.214704
3	FRS2_MOUSE|Q8C180_S365	0.209511	0.210689	0.213421	0.214244	0.217404	0.214347	0.214878	0.21549	0.215148	0.209486	0.213606	0.205632	0.211034	0.211503	0.213177	0.216312	0.217009	0.215345	0.212016	0.213857	0.213301	0.212627	0.212537	0.211182	0.216512	0.214031	0.21402	0.212522	0.209526	0.213945	0.21241	0.211877	0.212281	0.213394	0.211699	0.216207	0.213055	0.212038	0.215469	0.213048	0.213186	0.21242	0.214966	0.213959
3	FUBP2_MOUSE|Q3U0V1_T101	0.214177	0.210044	0.211332	0.213443	0.214473	0.215322	0.216382	0.212678	0.215484	0.211707	0.214427	0.212969	0.211888	0.209124	0.211517	0.21482	0.219993	0.214702	0.214067	0.209809	0.210062	0.211677	0.213665	0.210326	0.215703	0.214515	0.214902	0.21403	0.212754	0.214618	0.214554	0.213151	0.213153	0.211953	0.211691	0.2118	0.212663	0.212044	0.215266	0.212319	0.211101	0.211441	0.214519	0.214138
3	FXR1_MOUSE|Q61584_S435	0.209295	0.208845	0.206705	0.21227	0.214635	0.214296	0.215797	0.213323	0.212032	0.207499	0.208678	0.2075	0.212888	0.214924	0.217723	0.217456	0.218403	0.216933	0.215851	0.215002	0.216149	0.213563	0.212506	0.211551	0.215071	0.214298	0.214316	0.214762	0.213366	0.213098	0.21409	0.212412	0.213418	0.21252	0.21308	0.211844	0.212934	0.211835	0.21396	0.213872	0.213277	0.212234	0.212872	0.213053
3	FYB_MOUSE|O35601_S46	0.210006	0.210436	0.210728	0.21479	0.216512	0.213735	0.212064	0.208073	0.210386	0.208279	0.206339	0.212063	0.21414	0.215825	0.21725	0.218567	0.220529	0.218036	0.212258	0.212541	0.214633	0.21257	0.212308	0.209694	0.2153	0.212518	0.213547	0.21133	0.211824	0.212199	0.213995	0.211757	0.212982	0.214488	0.213107	0.214355	0.213254	0.213395	0.214873	0.21427	0.212733	0.212519	0.215254	0.214616
3	FYV1_MOUSE|Q9Z1T6_S329	0.204116	0.206447	0.207141	0.215039	0.216217	0.217406	0.214358	0.213647	0.217296	0.218551	0.218988	0.204951	0.206204	0.206602	0.217611	0.21294	0.212783	0.214069	0.218094	0.218025	0.212763	0.21597	0.212751	0.212862	0.215155	0.213029	0.212923	0.212863	0.213754	0.211965	0.214168	0.213477	0.213868	0.213033	0.21309	0.213693	0.21309	0.214406	0.211954	0.212475	0.212043	0.213662	0.212471	0.213652
3	G3X963_MOUSE|G3X963_S317	0.205425	0.211433	0.203749	0.217719	0.219479	0.214922	0.214104	0.21451	0.212796	0.211787	0.214534	0.206497	0.206619	0.210702	0.215627	0.21663	0.21821	0.215584	0.21535	0.215549	0.213961	0.214344	0.214058	0.214379	0.218653	0.215841	0.214813	0.216675	0.216208	0.21358	0.211344	0.214016	0.213441	0.213382	0.21421	0.213433	0.209264	0.213378	0.207981	0.212172	0.211001	0.211943	0.207803	0.212494
3	G3X9A3_MOUSE|G3X9A3_S462	0.208493	0.209135	0.211085	0.212761	0.212552	0.210636	0.21436	0.215368	0.213333	0.215195	0.213482	0.208744	0.212824	0.212197	0.214582	0.215023	0.214108	0.214248	0.21809	0.214161	0.216503	0.213242	0.215066	0.211751	0.218035	0.212351	0.211041	0.214857	0.212405	0.213278	0.215554	0.213822	0.215371	0.215909	0.215131	0.21024	0.210918	0.209363	0.209346	0.21395	0.211108	0.213908	0.213041	0.213715
3	G3X9A3_MOUSE|G3X9A3_S463	0.209421	0.211234	0.208946	0.21363	0.21285	0.213314	0.215207	0.212893	0.212995	0.213861	0.212649	0.211859	0.21197	0.213779	0.215423	0.213731	0.214637	0.213101	0.217158	0.214707	0.213527	0.213359	0.215066	0.211751	0.218035	0.212351	0.211041	0.214857	0.212405	0.213278	0.215554	0.213822	0.215371	0.215909	0.215131	0.21024	0.210918	0.209363	0.209346	0.21395	0.211108	0.213908	0.213041	0.213715
3	G3X9A3_MOUSE|G3X9A3_S831	0.207426	0.210596	0.209077	0.215335	0.214673	0.217423	0.215883	0.214139	0.213548	0.214068	0.21477	0.208886	0.211276	0.21038	0.214142	0.215737	0.215056	0.213595	0.216461	0.214501	0.210301	0.212776	0.215066	0.211751	0.218035	0.212351	0.211041	0.214857	0.212405	0.213278	0.215554	0.213822	0.215371	0.215909	0.215131	0.21024	0.210918	0.209363	0.209346	0.21395	0.211108	0.213908	0.213041	0.213715
3	G3X9Z4_MOUSE|G3X9Z4_S495	0.208253	0.215789	0.203993	0.214986	0.217312	0.211543	0.208826	0.216646	0.217169	0.210736	0.211111	0.209287	0.20989	0.211794	0.213912	0.21179	0.215471	0.214673	0.212818	0.215732	0.219472	0.218491	0.213707	0.212586	0.211545	0.213127	0.213879	0.212815	0.21191	0.214419	0.21466	0.212928	0.213481	0.212132	0.212654	0.213367	0.212688	0.211679	0.213461	0.213795	0.2135	0.213297	0.214897	0.213848
3	GA2L1_MOUSE|Q8JZP9_S306	0.212226	0.210955	0.211795	0.211716	0.214801	0.213839	0.213175	0.21225	0.214267	0.212789	0.21508	0.209035	0.212919	0.214384	0.214129	0.216015	0.214041	0.213509	0.214092	0.214261	0.21268	0.212339	0.213125	0.208091	0.214212	0.214045	0.214273	0.214486	0.21335	0.211962	0.214552	0.212292	0.214804	0.214018	0.211359	0.215874	0.214899	0.211567	0.213688	0.213109	0.212088	0.211813	0.2109	0.215747
3	GAB2_MOUSE|Q9Z1S8_S402	0.209546	0.206088	0.202609	0.215143	0.216383	0.215206	0.213897	0.21321	0.214502	0.21308	0.212891	0.210352	0.210415	0.214269	0.215548	0.216047	0.218514	0.214179	0.213369	0.214282	0.216299	0.213961	0.212288	0.206087	0.213128	0.212613	0.212819	0.213212	0.211699	0.213273	0.214851	0.214038	0.213569	0.212206	0.213443	0.215323	0.213305	0.213308	0.214741	0.213314	0.213311	0.213859	0.216149	0.213702
3	GAPD1_MOUSE|Q6PAR5_S902	0.208476	0.20943	0.210726	0.214323	0.216624	0.217188	0.215333	0.214066	0.216014	0.213205	0.216269	0.208127	0.208756	0.210894	0.213157	0.216742	0.21593	0.213681	0.212791	0.214942	0.211046	0.212287	0.212778	0.21267	0.210457	0.213155	0.212624	0.213037	0.213735	0.212551	0.212398	0.213382	0.212563	0.214066	0.214184	0.214176	0.213647	0.214514	0.212719	0.213562	0.212361	0.214771	0.213309	0.213713
3	GAPD1_MOUSE|Q6PAR5_T458	0.209265	0.211217	0.209638	0.21097	0.216866	0.209858	0.214206	0.209707	0.212116	0.211857	0.213571	0.210133	0.210465	0.214925	0.216188	0.216091	0.215802	0.215531	0.219493	0.214128	0.213453	0.214538	0.212778	0.21267	0.210457	0.213155	0.212624	0.213037	0.213735	0.212551	0.212398	0.213382	0.212563	0.214066	0.214184	0.214176	0.213647	0.214514	0.212719	0.213562	0.212361	0.214771	0.213309	0.213713
3	GAS7_MOUSE|Q60780_S97	0.205724	0.204058	0.207108	0.213051	0.217259	0.21219	0.21731	0.211979	0.21554	0.209013	0.211747	0.210673	0.212362	0.213575	0.214934	0.217652	0.220151	0.218655	0.213251	0.214995	0.212918	0.215441	0.213626	0.210142	0.215684	0.210937	0.216006	0.21034	0.212491	0.212853	0.217686	0.211134	0.214975	0.212197	0.211548	0.214839	0.211573	0.213814	0.212907	0.215657	0.210803	0.211984	0.212999	0.215996
3	GAS7_MOUSE|Q60780_T98	0.20641	0.207394	0.209343	0.215388	0.215732	0.21148	0.214624	0.212807	0.218389	0.209436	0.212051	0.207037	0.212898	0.213644	0.21386	0.215804	0.218006	0.218662	0.213432	0.214923	0.213047	0.215439	0.213626	0.210142	0.215684	0.210937	0.216006	0.21034	0.212491	0.212853	0.217686	0.211134	0.214975	0.212197	0.211548	0.214839	0.211573	0.213814	0.212907	0.215657	0.210803	0.211984	0.212999	0.215996
3	GEMI5_MOUSE|Q8BX17_S852	0.211748	0.21155	0.20872	0.212648	0.214545	0.214588	0.210469	0.211121	0.210038	0.21063	0.211635	0.211401	0.21306	0.210154	0.214998	0.219057	0.214887	0.217606	0.215155	0.213425	0.215994	0.216622	0.213306	0.214519	0.213838	0.213284	0.212097	0.213137	0.21311	0.212403	0.211633	0.213155	0.212182	0.213924	0.213269	0.213993	0.214153	0.214033	0.213537	0.211855	0.213342	0.213465	0.212921	0.21323
3	GGA3_MOUSE|Q8BMI3_S159	0.211148	0.210791	0.210535	0.214198	0.214163	0.214677	0.214583	0.213557	0.214569	0.217109	0.215363	0.211439	0.209544	0.211996	0.213309	0.214039	0.211743	0.211009	0.214544	0.214114	0.213539	0.214272	0.215261	0.213226	0.212972	0.215273	0.213538	0.212819	0.213406	0.212664	0.214114	0.210266	0.210476	0.213152	0.212378	0.2172	0.212413	0.213338	0.214638	0.214201	0.21086	0.211856	0.212497	0.21374
3	GGYF2_MOUSE|Q6Y7W8_S161	0.20542	0.210446	0.210353	0.21612	0.2174	0.215279	0.214424	0.213362	0.217013	0.212845	0.212151	0.206512	0.20823	0.215421	0.214937	0.215436	0.214858	0.213739	0.214034	0.215431	0.213454	0.213049	0.213964	0.21065	0.216354	0.214237	0.21298	0.213806	0.21435	0.213432	0.213482	0.213829	0.214143	0.212967	0.213217	0.21418	0.21341	0.213324	0.21218	0.212161	0.210499	0.212087	0.212749	0.212333
3	GGYF2_MOUSE|Q6Y7W8_S594	0.209785	0.20595	0.203573	0.214733	0.217024	0.215182	0.214001	0.211957	0.211356	0.211118	0.210165	0.212021	0.209224	0.21235	0.217857	0.219246	0.221025	0.219449	0.210781	0.213599	0.214467	0.214653	0.213964	0.21065	0.216354	0.214237	0.21298	0.213806	0.21435	0.213432	0.213482	0.213829	0.214143	0.212967	0.213217	0.21418	0.21341	0.213324	0.21218	0.212161	0.210499	0.212087	0.212749	0.212333
3	GIT1_MOUSE|Q68FF6_S371	0.211158	0.209403	0.208708	0.21438	0.213897	0.217197	0.216671	0.213609	0.213939	0.219352	0.218386	0.210078	0.211202	0.206378	0.213333	0.214249	0.211903	0.209608	0.21568	0.214673	0.213502	0.212596	0.21274	0.211271	0.217827	0.214402	0.212628	0.216488	0.216105	0.213792	0.213138	0.215731	0.214236	0.214034	0.210881	0.212853	0.212228	0.213779	0.210118	0.2123	0.21093	0.213074	0.209349	0.212294
3	GIT1_MOUSE|Q68FF6_S601	0.212232	0.208974	0.217468	0.211431	0.215096	0.215546	0.217753	0.21418	0.212407	0.215399	0.216409	0.205578	0.211193	0.206587	0.213307	0.216786	0.2121	0.213145	0.215932	0.213675	0.21187	0.212841	0.21274	0.211271	0.217827	0.214402	0.212628	0.216488	0.216105	0.213792	0.213138	0.215731	0.214236	0.214034	0.210881	0.212853	0.212228	0.213779	0.210118	0.2123	0.21093	0.213074	0.209349	0.212294
3	GIT1_MOUSE|Q68FF6_T373	0.210466	0.208984	0.212613	0.2155	0.21404	0.214901	0.216632	0.213094	0.212717	0.217853	0.217596	0.208869	0.209062	0.210025	0.213493	0.213823	0.213563	0.210286	0.216862	0.215313	0.211172	0.213163	0.21274	0.211271	0.217827	0.214402	0.212628	0.216488	0.216105	0.213792	0.213138	0.215731	0.214236	0.214034	0.210881	0.212853	0.212228	0.213779	0.210118	0.2123	0.21093	0.213074	0.209349	0.212294
3	GPBL1_MOUSE|Q6NZP2_S49	0.210551	0.211619	0.204495	0.213897	0.216073	0.214634	0.214729	0.211496	0.216899	0.211705	0.213272	0.211288	0.211392	0.213703	0.213016	0.215162	0.215129	0.212892	0.214801	0.213918	0.21417	0.215247	0.21486	0.212147	0.213116	0.209163	0.215935	0.214276	0.213086	0.212422	0.214946	0.21537	0.213296	0.216281	0.209155	0.214678	0.212428	0.21266	0.213634	0.213433	0.210538	0.214742	0.210618	0.213437
3	GPTC8_MOUSE|A2A6A1_S980	0.210696	0.208896	0.210498	0.215976	0.216247	0.211896	0.213275	0.215111	0.215139	0.21212	0.212351	0.21059	0.210003	0.213481	0.212731	0.21241	0.215449	0.216651	0.212582	0.213351	0.216246	0.214469	0.214808	0.210757	0.21588	0.213521	0.213772	0.213727	0.214036	0.213333	0.213306	0.213762	0.212401	0.212512	0.213253	0.21409	0.21209	0.213361	0.213609	0.212973	0.212319	0.211589	0.212999	0.212258
3	GRM1B_MOUSE|Q80TI0_T585	0.210591	0.208647	0.197452	0.215381	0.214546	0.213383	0.212529	0.21418	0.214001	0.208737	0.21209	0.208003	0.207146	0.218744	0.215974	0.219579	0.221947	0.216217	0.215753	0.214251	0.216735	0.213231	0.214046	0.223415	0.218376	0.212041	0.209801	0.214158	0.210417	0.213503	0.207615	0.2092	0.209785	0.214897	0.214756	0.208564	0.213247	0.212295	0.21391	0.213119	0.216064	0.214835	0.214084	0.211691
3	GTF2I_MOUSE|Q9ESZ8_T327	0.209549	0.209694	0.210438	0.213618	0.221187	0.221209	0.218305	0.209462	0.214008	0.212719	0.215977	0.207296	0.207379	0.205354	0.215625	0.222794	0.218043	0.217586	0.209333	0.212788	0.20723	0.209545	0.214491	0.213028	0.212553	0.215014	0.215272	0.215212	0.214523	0.214054	0.214078	0.212694	0.213883	0.211724	0.211724	0.213092	0.212268	0.212239	0.212073	0.213875	0.212812	0.211081	0.211959	0.212692
3	H12_MOUSE|P15864_S36	0.206345	0.215535	0.209721	0.211486	0.211499	0.212131	0.210651	0.220438	0.217982	0.22074	0.219864	0.200877	0.204545	0.199191	0.212964	0.210356	0.209827	0.210602	0.224559	0.220445	0.219234	0.219178	0.213127	0.220135	0.216069	0.213645	0.209011	0.215248	0.211379	0.21641	0.212483	0.216294	0.212309	0.212955	0.21422	0.204057	0.2128	0.211794	0.212794	0.21346	0.213614	0.213992	0.213476	0.21068
3	HCFC1_MOUSE|Q61191_S411	0.210282	0.208824	0.2095	0.215385	0.216706	0.21472	0.216738	0.212422	0.21332	0.213956	0.216463	0.207118	0.209359	0.208798	0.214287	0.216511	0.215674	0.215111	0.215714	0.213815	0.212022	0.213254	0.213567	0.21242	0.215919	0.214003	0.214352	0.213749	0.214223	0.213949	0.214077	0.214555	0.213613	0.212665	0.211761	0.212781	0.212033	0.212312	0.212253	0.21233	0.212867	0.211514	0.212649	0.212768
3	HCFC1_MOUSE|Q61191_S794	0.208701	0.213772	0.212818	0.213625	0.214548	0.212723	0.212521	0.216781	0.214925	0.21523	0.217371	0.207321	0.210612	0.212956	0.213571	0.217121	0.21429	0.212904	0.215599	0.211136	0.211498	0.210062	0.213567	0.21242	0.215919	0.214003	0.214352	0.213749	0.214223	0.213949	0.214077	0.214555	0.213613	0.212665	0.211761	0.212781	0.212033	0.212312	0.212253	0.21233	0.212867	0.211514	0.212649	0.212768
3	HCFC1_MOUSE|Q61191_T413	0.209513	0.210211	0.207392	0.214789	0.216997	0.214568	0.217232	0.214295	0.21551	0.21321	0.215646	0.209724	0.211525	0.208618	0.210556	0.21526	0.212841	0.214156	0.214985	0.213931	0.215722	0.213355	0.213567	0.21242	0.215919	0.214003	0.214352	0.213749	0.214223	0.213949	0.214077	0.214555	0.213613	0.212665	0.211761	0.212781	0.212033	0.212312	0.212253	0.21233	0.212867	0.211514	0.212649	0.212768
3	HCLS1_MOUSE|P49710_T226	0.209939	0.205424	0.205303	0.214444	0.219317	0.219207	0.214619	0.216393	0.214236	0.213516	0.216038	0.204083	0.208094	0.206744	0.213205	0.221025	0.220173	0.216336	0.214897	0.210368	0.21423	0.211619	0.211822	0.206766	0.213537	0.21369	0.214876	0.211497	0.212569	0.212531	0.213208	0.211329	0.213546	0.213186	0.213884	0.217233	0.21323	0.213488	0.214225	0.215479	0.21212	0.213251	0.214763	0.213995
3	HDAC1_MOUSE|O09106_S406	0.211754	0.213799	0.209486	0.212799	0.213308	0.213674	0.212103	0.213359	0.207929	0.217106	0.210593	0.21238	0.206798	0.214299	0.215768	0.222541	0.21663	0.213609	0.215581	0.211379	0.213359	0.211626	0.213223	0.212019	0.213966	0.212799	0.214027	0.214341	0.214345	0.213705	0.213073	0.214888	0.213668	0.213557	0.212356	0.213204	0.213439	0.212842	0.211916	0.211324	0.212569	0.212793	0.212377	0.213944
3	HDAC6_MOUSE|Q9Z2V5_S1148	0.215496	0.205338	0.200302	0.210804	0.207842	0.213237	0.214445	0.210478	0.208426	0.215949	0.21679	0.221004	0.206381	0.209138	0.22013	0.219763	0.217105	0.214667	0.211973	0.215256	0.217802	0.216701	0.213117	0.214056	0.215158	0.214473	0.214019	0.216218	0.215335	0.213982	0.21333	0.216183	0.214066	0.21207	0.211662	0.213232	0.212959	0.212212	0.211333	0.208834	0.212421	0.213135	0.210375	0.212085
3	HDAC6_MOUSE|Q9Z2V5_S21	0.213095	0.216328	0.211872	0.21737	0.220077	0.216442	0.213635	0.211763	0.21188	0.210719	0.21227	0.209684	0.208498	0.212449	0.215676	0.21921	0.215595	0.21662	0.209902	0.206044	0.208938	0.211704	0.213117	0.214056	0.215158	0.214473	0.214019	0.216218	0.215335	0.213982	0.21333	0.216183	0.214066	0.21207	0.211662	0.213232	0.212959	0.212212	0.211333	0.208834	0.212421	0.213135	0.210375	0.212085
3	HECD1_MOUSE|Q69ZR2_S357	0.204541	0.211352	0.206476	0.216109	0.210007	0.212754	0.212292	0.213993	0.207148	0.216187	0.217282	0.213185	0.207771	0.207217	0.217921	0.221624	0.212261	0.21762	0.213653	0.219396	0.215822	0.214789	0.213404	0.212834	0.215982	0.212902	0.211071	0.21099	0.211875	0.212827	0.211448	0.212182	0.211476	0.213856	0.214251	0.215734	0.213668	0.213602	0.213803	0.214331	0.213496	0.213776	0.21311	0.213713
3	HELZ_MOUSE|Q6DFV5_S1786	0.210577	0.206961	0.209595	0.213639	0.212387	0.215231	0.215868	0.210661	0.211705	0.215051	0.212657	0.213664	0.212544	0.214303	0.213889	0.214678	0.214471	0.211922	0.216385	0.216422	0.213926	0.213616	0.216025	0.211233	0.21628	0.214207	0.211273	0.213271	0.213156	0.213728	0.213936	0.212436	0.211997	0.211076	0.211123	0.214177	0.214369	0.212734	0.215025	0.213381	0.21046	0.213636	0.213435	0.213336
3	HGNAT_MOUSE|Q3UDW8_S238	0.211426	0.219663	0.209324	0.217713	0.219274	0.217321	0.213618	0.216256	0.210728	0.211352	0.210794	0.204676	0.204036	0.200873	0.216222	0.219045	0.223062	0.215927	0.212563	0.209881	0.214435	0.21074	0.216106	0.220564	0.216109	0.212702	0.212949	0.213842	0.21024	0.215566	0.212484	0.214415	0.21212	0.215239	0.212951	0.211828	0.20971	0.211297	0.213245	0.208834	0.211052	0.213401	0.214949	0.210471
3	HMHA1_MOUSE|Q3TBD2_S577_S591	0.209418	0.208345	0.212733	0.212501	0.217542	0.216546	0.217151	0.217446	0.218009	0.218162	0.221677	0.205908	0.20838	0.205039	0.211212	0.212585	0.20927	0.208276	0.215247	0.214259	0.21117	0.218492	0.213095	0.211148	0.214235	0.212979	0.213979	0.212605	0.214089	0.212912	0.213883	0.213118	0.213697	0.213341	0.212587	0.214945	0.212808	0.21422	0.212114	0.21434	0.211702	0.212857	0.212457	0.213264
3	HMHA1_MOUSE|Q3TBD2_S584_S591	0.207122	0.215411	0.214708	0.212972	0.21587	0.213898	0.215187	0.217965	0.219588	0.215276	0.217634	0.207019	0.209056	0.209753	0.212517	0.209324	0.209416	0.211708	0.213458	0.217185	0.212852	0.211887	0.213095	0.211148	0.214235	0.212979	0.213979	0.212605	0.214089	0.212912	0.213883	0.213118	0.213697	0.213341	0.212587	0.214945	0.212808	0.21422	0.212114	0.21434	0.211702	0.212857	0.212457	0.213264
3	HMOX1_MOUSE|P14901_S242	0.207286	0.211506	0.208406	0.212323	0.214214	0.211157	0.213343	0.217553	0.212736	0.216014	0.215441	0.210801	0.21143	0.209876	0.214456	0.211516	0.213318	0.211424	0.22112	0.213037	0.21647	0.216494	0.211831	0.213372	0.210695	0.214165	0.211648	0.214263	0.21295	0.213712	0.211601	0.213742	0.213701	0.214521	0.213834	0.210967	0.215627	0.212427	0.215391	0.213594	0.214822	0.212541	0.213417	0.211499
3	HNRH1_MOUSE|O35737_S104	0.209261	0.208905	0.210193	0.213215	0.215352	0.213121	0.214508	0.213963	0.216323	0.216063	0.215249	0.207892	0.206932	0.211147	0.214966	0.21552	0.213397	0.213824	0.214263	0.215695	0.215271	0.214964	0.213803	0.209975	0.20845	0.215226	0.214372	0.213225	0.211664	0.213806	0.213692	0.213124	0.212575	0.21359	0.213661	0.214699	0.212657	0.213149	0.213801	0.214395	0.212327	0.211458	0.21452	0.216104
3	HS90A_MOUSE|P07901_Y285	0.213055	0.213979	0.211253	0.212169	0.210633	0.213116	0.213172	0.212476	0.21478	0.212982	0.215664	0.212018	0.209636	0.212888	0.216449	0.214764	0.215213	0.213709	0.21358	0.21477	0.212187	0.211784	0.214325	0.212747	0.216661	0.213444	0.213082	0.212521	0.216087	0.212788	0.213084	0.213784	0.215573	0.212674	0.213403	0.21546	0.213224	0.211703	0.211042	0.211847	0.213876	0.211906	0.210573	0.210473
3	HTR5B_MOUSE|Q8C547_S1737	0.210436	0.216481	0.212333	0.213171	0.212634	0.212996	0.212471	0.213966	0.213622	0.215942	0.214186	0.210156	0.207243	0.210083	0.213126	0.215014	0.212219	0.212993	0.216264	0.216898	0.214472	0.213444	0.213139	0.218709	0.216349	0.21319	0.212683	0.213509	0.212156	0.214233	0.212737	0.211364	0.212598	0.212064	0.214255	0.210025	0.212439	0.212178	0.212752	0.213196	0.212948	0.214223	0.212674	0.212849
3	HTSF1_MOUSE|Q8BGC0_S388	0.204728	0.208772	0.205166	0.213406	0.215126	0.217184	0.216886	0.213022	0.216349	0.213913	0.214987	0.205131	0.205912	0.216181	0.212743	0.220546	0.217511	0.212736	0.216222	0.221809	0.210037	0.210874	0.213501	0.212828	0.215504	0.214783	0.214661	0.214401	0.215772	0.213723	0.212059	0.214589	0.213931	0.214363	0.210246	0.214377	0.213171	0.213246	0.210916	0.211902	0.210577	0.212188	0.21174	0.211816
3	HTSF1_MOUSE|Q8BGC0_S679	0.209126	0.204035	0.213055	0.211763	0.208286	0.211702	0.215335	0.21029	0.207825	0.219775	0.217917	0.213764	0.210659	0.209431	0.218613	0.218087	0.215353	0.203725	0.218063	0.216966	0.217209	0.2183	0.213501	0.212828	0.215504	0.214783	0.214661	0.214401	0.215772	0.213723	0.212059	0.214589	0.213931	0.214363	0.210246	0.214377	0.213171	0.213246	0.210916	0.211902	0.210577	0.212188	0.21174	0.211816
3	HTSF1_MOUSE|Q8BGC0_S705	0.208237	0.20491	0.20254	0.218497	0.215892	0.206986	0.210383	0.217459	0.214989	0.208441	0.206397	0.207381	0.207915	0.221698	0.215373	0.213965	0.220911	0.221822	0.214506	0.212838	0.219611	0.21798	0.213501	0.212828	0.215504	0.214783	0.214661	0.214401	0.215772	0.213723	0.212059	0.214589	0.213931	0.214363	0.210246	0.214377	0.213171	0.213246	0.210916	0.211902	0.210577	0.212188	0.21174	0.211816
3	HUWE1_MOUSE|Q7TMY8_S3758	0.211033	0.214633	0.213531	0.214266	0.213622	0.214716	0.213774	0.211614	0.209802	0.212598	0.213386	0.212235	0.213785	0.211669	0.216459	0.216186	0.214889	0.212602	0.213805	0.21246	0.21176	0.211455	0.213511	0.216642	0.214605	0.213734	0.213263	0.214222	0.213063	0.213541	0.213039	0.214011	0.212657	0.212875	0.213639	0.211858	0.212723	0.212627	0.21186	0.21244	0.212684	0.213061	0.212246	0.212059
3	I2BP2_MOUSE|E9Q1P8_S71	0.208883	0.208385	0.206172	0.215158	0.215936	0.215294	0.216779	0.213717	0.214015	0.212975	0.215458	0.208244	0.205875	0.20665	0.216113	0.217968	0.218447	0.218011	0.21534	0.213419	0.213403	0.213391	0.213458	0.20885	0.21277	0.214896	0.214352	0.213664	0.214202	0.215644	0.215358	0.215483	0.214906	0.212971	0.210849	0.211818	0.211417	0.211902	0.213086	0.211809	0.2118	0.211521	0.215008	0.214496
3	I2BP2_MOUSE|E9Q1P8_T73	0.208379	0.208255	0.204723	0.216192	0.217341	0.216374	0.21428	0.214554	0.215262	0.213315	0.212856	0.206134	0.205506	0.209282	0.216007	0.218807	0.218173	0.217528	0.21481	0.212158	0.21608	0.213501	0.213458	0.20885	0.21277	0.214896	0.214352	0.213664	0.214202	0.215644	0.215358	0.215483	0.214906	0.212971	0.210849	0.211818	0.211417	0.211902	0.213086	0.211809	0.2118	0.211521	0.215008	0.214496
3	IF4B_MOUSE|Q8BGD9_S422	0.207985	0.206609	0.213354	0.214296	0.217303	0.20835	0.214978	0.21268	0.21613	0.204892	0.209974	0.208442	0.20929	0.216743	0.214826	0.215952	0.220582	0.219041	0.21268	0.213142	0.21864	0.213629	0.213632	0.207314	0.21451	0.213572	0.21426	0.212573	0.211505	0.213496	0.214133	0.211755	0.210606	0.213073	0.212409	0.214939	0.213898	0.21218	0.217247	0.215865	0.211298	0.2121	0.215131	0.214706
3	IF4B_MOUSE|Q8BGD9_S425	0.206942	0.203618	0.218563	0.215716	0.214936	0.21087	0.216493	0.214893	0.209869	0.206428	0.211685	0.211474	0.21167	0.214978	0.216555	0.212344	0.217363	0.219112	0.212735	0.214246	0.214505	0.214658	0.213632	0.207314	0.21451	0.213572	0.21426	0.212573	0.211505	0.213496	0.214133	0.211755	0.210606	0.213073	0.212409	0.214939	0.213898	0.21218	0.217247	0.215865	0.211298	0.2121	0.215131	0.214706
3	IF4B_MOUSE|Q8BGD9_S459	0.211764	0.210234	0.207923	0.212418	0.213944	0.217151	0.210913	0.214244	0.213099	0.213645	0.213527	0.213328	0.210152	0.209885	0.215201	0.215334	0.216763	0.212232	0.21302	0.21368	0.215677	0.216003	0.213632	0.207314	0.21451	0.213572	0.21426	0.212573	0.211505	0.213496	0.214133	0.211755	0.210606	0.213073	0.212409	0.214939	0.213898	0.21218	0.217247	0.215865	0.211298	0.2121	0.215131	0.214706
3	IF4B_MOUSE|Q8BGD9_S498	0.207446	0.207561	0.211685	0.217329	0.213804	0.211219	0.21033	0.212991	0.210653	0.215084	0.214659	0.20826	0.208722	0.211516	0.216093	0.218492	0.216234	0.213244	0.214344	0.215306	0.217814	0.217058	0.213632	0.207314	0.21451	0.213572	0.21426	0.212573	0.211505	0.213496	0.214133	0.211755	0.210606	0.213073	0.212409	0.214939	0.213898	0.21218	0.217247	0.215865	0.211298	0.2121	0.215131	0.214706
3	IF4G3_MOUSE|Q80XI3_S436	0.20892	0.21445	0.209913	0.214256	0.221172	0.215043	0.214947	0.210798	0.214902	0.212222	0.211743	0.2067	0.207209	0.211094	0.214482	0.223643	0.217386	0.214922	0.209509	0.211856	0.213441	0.210991	0.213771	0.211266	0.215148	0.212543	0.215618	0.211567	0.21225	0.213099	0.214133	0.213158	0.211778	0.2126	0.213615	0.213639	0.211708	0.212884	0.215606	0.213653	0.211054	0.213375	0.214153	0.213714
3	IKKB_MOUSE|O88351_S670	0.207764	0.204825	0.210724	0.213706	0.212559	0.212646	0.215775	0.21754	0.22182	0.218606	0.218213	0.200874	0.206297	0.210036	0.216001	0.214156	0.212236	0.213997	0.216996	0.214688	0.213571	0.216199	0.213159	0.21265	0.214755	0.212549	0.21285	0.212144	0.212758	0.211354	0.212698	0.212136	0.212397	0.213331	0.212968	0.215072	0.21234	0.214036	0.212603	0.213511	0.214737	0.214269	0.213969	0.214082
3	IKZF1_MOUSE|Q03267_S440	0.204807	0.212458	0.213193	0.219764	0.220637	0.21362	0.21121	0.217916	0.218948	0.216306	0.208269	0.203055	0.20651	0.215511	0.21527	0.21601	0.216186	0.213778	0.208753	0.209643	0.214571	0.212894	0.213799	0.211352	0.213829	0.213356	0.213918	0.214091	0.211763	0.214711	0.212795	0.214522	0.211882	0.21212	0.210025	0.216403	0.212897	0.21313	0.214177	0.210182	0.213561	0.212937	0.214486	0.214365
3	INO1_MOUSE|Q9JHU9_T523	0.212233	0.209667	0.213285	0.21537	0.215021	0.215814	0.215542	0.213727	0.211175	0.21615	0.214271	0.210927	0.212953	0.212792	0.213383	0.214982	0.21274	0.211465	0.213177	0.212016	0.212527	0.211043	0.213671	0.212987	0.213772	0.215007	0.212913	0.212607	0.213534	0.213009	0.21253	0.213151	0.213918	0.214865	0.213691	0.215744	0.212479	0.213275	0.213502	0.210792	0.21087	0.212825	0.212848	0.212363
3	INT12_MOUSE|Q9D168_S377	0.211423	0.20774	0.200385	0.212845	0.213623	0.211765	0.207702	0.215439	0.21312	0.208409	0.207167	0.210729	0.210018	0.219876	0.21375	0.216822	0.221707	0.218909	0.215202	0.216426	0.218574	0.21753	0.212705	0.212423	0.215673	0.212133	0.214631	0.2134	0.212713	0.216825	0.214212	0.214483	0.213323	0.211256	0.210965	0.212067	0.212552	0.211258	0.212679	0.212646	0.212098	0.214165	0.2149	0.213202
3	IPO11_MOUSE|Q8K2V6_S343	0.208009	0.208847	0.209241	0.213065	0.216192	0.215451	0.215608	0.214226	0.216515	0.219478	0.220106	0.207612	0.206969	0.204438	0.213292	0.213922	0.209733	0.212363	0.216574	0.217254	0.214899	0.215736	0.215008	0.217519	0.214761	0.214441	0.214644	0.213298	0.212918	0.212691	0.213126	0.213905	0.213976	0.212567	0.212066	0.213931	0.212073	0.213281	0.210629	0.212895	0.212317	0.211587	0.210879	0.211785
3	ISCU_MOUSE|Q9D7P6_Y44	0.212449	0.209222	0.210816	0.215912	0.216848	0.219185	0.217482	0.213056	0.215621	0.215976	0.217046	0.210724	0.208122	0.212978	0.213566	0.213883	0.210106	0.211257	0.212737	0.210715	0.209075	0.213183	0.214673	0.208934	0.213972	0.21455	0.213035	0.213108	0.21244	0.214321	0.210131	0.211796	0.212409	0.21143	0.214742	0.214896	0.213459	0.21396	0.214984	0.212191	0.212272	0.212951	0.214797	0.215228
3	ITSN2_MOUSE|Q9Z0R6_S838	0.205481	0.214369	0.216755	0.215114	0.220273	0.212407	0.214435	0.209626	0.216249	0.213064	0.215309	0.210912	0.209806	0.212349	0.213972	0.218521	0.211834	0.213255	0.209129	0.212388	0.21154	0.213102	0.214265	0.211539	0.216876	0.213525	0.213644	0.214527	0.21475	0.213344	0.213259	0.213654	0.214531	0.213431	0.212491	0.21295	0.212249	0.21282	0.211693	0.212168	0.211293	0.212653	0.211412	0.213257
3	ITSN2_MOUSE|Q9Z0R6_T836	0.211153	0.211223	0.206364	0.208305	0.210764	0.218036	0.217577	0.207958	0.208231	0.214332	0.214263	0.222704	0.207941	0.206152	0.216891	0.221187	0.213764	0.21852	0.215962	0.214326	0.208538	0.215077	0.214265	0.211539	0.216876	0.213525	0.213644	0.214527	0.21475	0.213344	0.213259	0.213654	0.214531	0.213431	0.212491	0.21295	0.212249	0.21282	0.211693	0.212168	0.211293	0.212653	0.211412	0.213257
3	JUPI2_MOUSE|Q6PGH2_S97	0.213524	0.197635	0.215032	0.213662	0.211232	0.213005	0.210276	0.21407	0.209938	0.215686	0.212732	0.210395	0.211244	0.212406	0.216506	0.21509	0.218745	0.216561	0.215636	0.211563	0.21705	0.217522	0.219503	0.20552	0.218397	0.212258	0.213952	0.213855	0.210424	0.214396	0.211994	0.211094	0.213313	0.21126	0.212114	0.214931	0.213368	0.211823	0.217404	0.213969	0.213643	0.207512	0.215156	0.214042
3	K0930_MOUSE|Q3UE31_S268	0.211021	0.212048	0.208468	0.210247	0.222959	0.216289	0.215896	0.210603	0.215659	0.212742	0.213278	0.215535	0.211048	0.213549	0.213724	0.216142	0.214256	0.210877	0.20881	0.210497	0.213844	0.212417	0.214087	0.212836	0.212706	0.212969	0.214746	0.213424	0.216056	0.212224	0.2145	0.213986	0.216077	0.213776	0.212665	0.212326	0.211945	0.212112	0.211474	0.21161	0.212366	0.213756	0.212106	0.212585
3	K0930_MOUSE|Q3UE31_S268_S279	0.20842	0.20762	0.208313	0.21217	0.220716	0.21437	0.214946	0.210731	0.212068	0.213964	0.215354	0.207339	0.210682	0.206727	0.217286	0.220394	0.213036	0.215482	0.213565	0.212627	0.216786	0.21703	0.214087	0.212836	0.212706	0.212969	0.214746	0.213424	0.216056	0.212224	0.2145	0.213986	0.216077	0.213776	0.212665	0.212326	0.211945	0.212112	0.211474	0.21161	0.212366	0.213756	0.212106	0.212585
3	K0930_MOUSE|Q3UE31_S322	0.215645	0.214468	0.210454	0.211623	0.214198	0.216822	0.217277	0.206661	0.211685	0.212524	0.215261	0.216028	0.211869	0.206411	0.213746	0.216306	0.213892	0.213365	0.214815	0.213126	0.209486	0.214327	0.214087	0.212836	0.212706	0.212969	0.214746	0.213424	0.216056	0.212224	0.2145	0.213986	0.216077	0.213776	0.212665	0.212326	0.211945	0.212112	0.211474	0.21161	0.212366	0.213756	0.212106	0.212585
3	K0930_MOUSE|Q3UE31_T293	0.212848	0.216402	0.210725	0.216622	0.218149	0.213303	0.214265	0.21274	0.215068	0.209244	0.210595	0.209663	0.209802	0.215129	0.213586	0.215173	0.215894	0.216993	0.210044	0.210869	0.21093	0.212008	0.214087	0.212836	0.212706	0.212969	0.214746	0.213424	0.216056	0.212224	0.2145	0.213986	0.216077	0.213776	0.212665	0.212326	0.211945	0.212112	0.211474	0.21161	0.212366	0.213756	0.212106	0.212585
3	K1109_MOUSE|A2AAE1_S1312	0.211041	0.215312	0.210854	0.213344	0.21529	0.217798	0.211312	0.212823	0.212374	0.215216	0.211323	0.211091	0.210959	0.212791	0.213498	0.214954	0.213908	0.211999	0.214065	0.215733	0.212211	0.212343	0.211767	0.217345	0.216222	0.211196	0.211787	0.211573	0.212668	0.210799	0.214173	0.21049	0.210861	0.215711	0.213912	0.215029	0.214522	0.212762	0.21303	0.210397	0.214139	0.21319	0.213603	0.21505
3	K1522_MOUSE|A2A7S8_S1003	0.21348	0.213189	0.21064	0.216861	0.215153	0.217691	0.216532	0.216603	0.215867	0.220395	0.216801	0.205826	0.203047	0.206643	0.213028	0.214602	0.212308	0.210537	0.212801	0.213728	0.212423	0.211431	0.218282	0.216507	0.217874	0.216948	0.21547	0.217731	0.218692	0.214539	0.215507	0.216475	0.217297	0.210685	0.208758	0.205181	0.210321	0.208916	0.209349	0.213302	0.211619	0.209184	0.207704	0.209232
3	K1522_MOUSE|A2A7S8_S909	0.210397	0.210523	0.207323	0.216906	0.219035	0.218247	0.216396	0.218056	0.221867	0.221651	0.221615	0.205011	0.208839	0.205733	0.211635	0.209942	0.211365	0.209297	0.212482	0.211136	0.210525	0.211113	0.218282	0.216507	0.217874	0.216948	0.21547	0.217731	0.218692	0.214539	0.215507	0.216475	0.217297	0.210685	0.208758	0.205181	0.210321	0.208916	0.209349	0.213302	0.211619	0.209184	0.207704	0.209232
3	KANL1_MOUSE|Q80TG1_S1013	0.212492	0.21234	0.211277	0.216513	0.218871	0.217264	0.21622	0.211947	0.211719	0.211708	0.210812	0.209031	0.209205	0.210554	0.215613	0.217955	0.218391	0.216364	0.211351	0.209209	0.211625	0.209421	0.215928	0.213944	0.218315	0.214884	0.21532	0.213456	0.214845	0.213653	0.212302	0.212888	0.212346	0.212844	0.212948	0.214825	0.210862	0.213694	0.211449	0.212722	0.20985	0.21014	0.211364	0.211638
3	KAP0_MOUSE|Q9DBC7_S77	0.212672	0.203403	0.201494	0.214409	0.216005	0.21468	0.216366	0.210811	0.213122	0.212387	0.212004	0.210162	0.214215	0.208932	0.213707	0.21901	0.220102	0.219979	0.214318	0.212632	0.212588	0.216407	0.212039	0.212141	0.215608	0.212497	0.212439	0.211326	0.214563	0.211257	0.215198	0.212078	0.214597	0.215559	0.212117	0.215758	0.211715	0.213471	0.212857	0.211901	0.213909	0.213207	0.212185	0.213886
3	KDM2A_MOUSE|P59997_S422	0.210303	0.212542	0.211693	0.214376	0.214466	0.214291	0.214247	0.217593	0.218278	0.214581	0.215498	0.206036	0.207551	0.211188	0.212361	0.213538	0.21458	0.215481	0.214757	0.213677	0.211022	0.211953	0.214404	0.219377	0.214861	0.214024	0.21553	0.215759	0.212036	0.214203	0.213464	0.215009	0.21232	0.213602	0.213891	0.215456	0.210254	0.2122	0.208717	0.209201	0.210064	0.212932	0.210424	0.212379
3	KDM4C_MOUSE|Q8VCD7_S477	0.206032	0.208515	0.207261	0.211572	0.215192	0.215643	0.215301	0.210846	0.21157	0.216072	0.21316	0.211272	0.201601	0.209233	0.21894	0.220493	0.218201	0.215659	0.218216	0.216117	0.214695	0.213771	0.212909	0.213969	0.218691	0.21506	0.215664	0.216431	0.213663	0.214082	0.212748	0.213706	0.212001	0.210501	0.211785	0.213049	0.214358	0.210101	0.213642	0.212163	0.212663	0.211777	0.210249	0.21099
3	KI13A_MOUSE|Q9EQW7_T1372	0.21109	0.212407	0.212801	0.21249	0.215395	0.21249	0.213828	0.212155	0.211872	0.211431	0.216725	0.213204	0.213982	0.210943	0.214231	0.215498	0.212903	0.212629	0.212094	0.21372	0.216408	0.211987	0.210752	0.213733	0.214668	0.214295	0.212843	0.213154	0.214197	0.21327	0.212383	0.213908	0.214719	0.214196	0.210047	0.212889	0.214073	0.213975	0.211678	0.213303	0.21393	0.213096	0.211573	0.213658
3	KI67_MOUSE|E9PVX6_S2719_S2723	0.210572	0.208097	0.209375	0.215569	0.216569	0.210727	0.212243	0.209976	0.209501	0.211288	0.208506	0.208137	0.20711	0.221476	0.218621	0.22191	0.215992	0.217947	0.213184	0.21246	0.216152	0.214071	0.218254	0.230443	0.221041	0.214232	0.215884	0.219228	0.210535	0.220131	0.21523	0.216239	0.212233	0.212547	0.211058	0.202599	0.205348	0.20297	0.20596	0.209042	0.212308	0.211235	0.210646	0.211217
3	KIF2A_MOUSE|P28740_S139	0.215148	0.204974	0.210296	0.212607	0.216331	0.216474	0.217238	0.214933	0.214047	0.21244	0.218616	0.214437	0.210237	0.198801	0.212284	0.213702	0.218518	0.216853	0.210962	0.209975	0.216903	0.213608	0.214687	0.216441	0.216151	0.213395	0.214314	0.213856	0.213553	0.212668	0.214286	0.214055	0.213602	0.212222	0.213529	0.212211	0.212527	0.212066	0.211442	0.211423	0.211839	0.212315	0.21198	0.211755
3	KKCC2_MOUSE|Q8C078_S511	0.208268	0.209147	0.211158	0.214098	0.217886	0.21723	0.216486	0.209159	0.212131	0.213818	0.210284	0.212691	0.213551	0.213777	0.215548	0.2196	0.216435	0.216157	0.211571	0.211642	0.208464	0.210796	0.211817	0.209282	0.216141	0.211206	0.210979	0.212605	0.213151	0.212986	0.211363	0.212247	0.212313	0.21464	0.215422	0.216306	0.21511	0.215249	0.212711	0.214379	0.212728	0.213265	0.211832	0.214519
3	KKCC2_MOUSE|Q8C078_S91	0.206196	0.203713	0.220251	0.214585	0.217763	0.216468	0.217568	0.213114	0.218516	0.215735	0.214704	0.206676	0.212507	0.214869	0.212136	0.213384	0.210125	0.214277	0.212378	0.213663	0.209022	0.21193	0.211817	0.209282	0.216141	0.211206	0.210979	0.212605	0.213151	0.212986	0.211363	0.212247	0.212313	0.21464	0.215422	0.216306	0.21511	0.215249	0.212711	0.214379	0.212728	0.213265	0.211832	0.214519
3	KLC4_MOUSE|Q9DBS5_S460	0.210144	0.211819	0.211508	0.212613	0.216402	0.215193	0.215769	0.208946	0.210457	0.215642	0.210963	0.213809	0.208117	0.214296	0.218016	0.220496	0.215513	0.21514	0.212253	0.21202	0.211187	0.209634	0.21129	0.208409	0.215311	0.212238	0.215184	0.214338	0.214189	0.211177	0.213313	0.214109	0.213135	0.212494	0.213596	0.215971	0.213372	0.215113	0.212977	0.212527	0.212207	0.214298	0.212832	0.212198
3	KMT2B_MOUSE|O08550_S720	0.213089	0.215987	0.21356	0.21572	0.215874	0.216101	0.214871	0.210918	0.210107	0.210926	0.209255	0.21287	0.213703	0.213832	0.214307	0.217807	0.217056	0.21666	0.210324	0.210347	0.208459	0.208217	0.215169	0.213978	0.212668	0.213034	0.219497	0.214033	0.212194	0.21221	0.216944	0.212355	0.211317	0.213826	0.210946	0.213245	0.207411	0.213223	0.212894	0.214298	0.212139	0.209803	0.214817	0.214125
3	KMT2B_MOUSE|O08550_S826	0.209988	0.214662	0.210827	0.20927	0.211757	0.216287	0.210662	0.215201	0.215108	0.211179	0.210624	0.209779	0.213204	0.213152	0.210998	0.218707	0.216621	0.216211	0.21766	0.214532	0.211621	0.211982	0.215169	0.213978	0.212668	0.213034	0.219497	0.214033	0.212194	0.21221	0.216944	0.212355	0.211317	0.213826	0.210946	0.213245	0.207411	0.213223	0.212894	0.214298	0.212139	0.209803	0.214817	0.214125
3	KMT2D_MOUSE|Q6PDK2_S2597	0.211781	0.210762	0.208457	0.217068	0.216943	0.217297	0.214714	0.214173	0.210832	0.212333	0.210672	0.209249	0.208036	0.211338	0.215135	0.216952	0.219165	0.215895	0.213389	0.211193	0.213964	0.210575	0.214729	0.213819	0.212062	0.213318	0.213338	0.210717	0.211262	0.212851	0.214796	0.210498	0.210571	0.212437	0.212664	0.212837	0.213226	0.213479	0.217605	0.213112	0.211667	0.212914	0.217645	0.21469
3	KPBB_MOUSE|Q7TSH2_S19	0.201229	0.208638	0.20705	0.213814	0.216551	0.216057	0.215011	0.217485	0.219534	0.214391	0.218917	0.200965	0.207963	0.213305	0.21253	0.217141	0.215445	0.211551	0.217302	0.220455	0.210962	0.212729	0.214077	0.216623	0.2148	0.212419	0.214154	0.214427	0.212402	0.212101	0.212634	0.214366	0.211708	0.213137	0.213095	0.212071	0.213039	0.214397	0.212226	0.213031	0.212984	0.212283	0.211761	0.212609
3	KRIT1_MOUSE|Q6S5J6_S274	0.211731	0.210163	0.209021	0.213738	0.21756	0.220538	0.217694	0.213647	0.219326	0.215196	0.214539	0.210411	0.213697	0.209301	0.208817	0.215269	0.214749	0.21298	0.208761	0.214275	0.208777	0.209598	0.213106	0.214759	0.21433	0.211197	0.211632	0.21219	0.212006	0.212597	0.213587	0.213486	0.213071	0.212283	0.215214	0.212792	0.213292	0.213608	0.211321	0.213854	0.214133	0.21497	0.212661	0.214263
3	KS6C1_MOUSE|Q8BLK9_S558	0.207	0.208099	0.210443	0.210979	0.221055	0.214953	0.214867	0.209018	0.212952	0.21513	0.216337	0.218343	0.214076	0.2103	0.215913	0.216701	0.211389	0.214246	0.20673	0.21392	0.211457	0.215832	0.212043	0.208644	0.215835	0.212917	0.213556	0.211646	0.213612	0.211902	0.215712	0.213426	0.2142	0.212295	0.213435	0.216141	0.212026	0.213183	0.215156	0.212213	0.213521	0.213348	0.213393	0.212072
3	KSYK_MOUSE|P48025_S270	0.204859	0.207613	0.205799	0.217365	0.219916	0.218193	0.216971	0.208658	0.21267	0.210637	0.211162	0.206566	0.211052	0.208922	0.215701	0.223915	0.220155	0.219698	0.21247	0.213987	0.210509	0.212246	0.211193	0.211251	0.212829	0.212551	0.213961	0.211294	0.213867	0.212507	0.212778	0.212219	0.212829	0.212737	0.214803	0.214434	0.213593	0.213389	0.214007	0.213362	0.214701	0.213953	0.213649	0.214452
3	KTI12_MOUSE|Q9D1R2_T156	0.20988	0.204695	0.207486	0.215935	0.213512	0.213673	0.213594	0.217579	0.216468	0.215814	0.215037	0.205819	0.21186	0.209612	0.216702	0.211137	0.216915	0.212576	0.215358	0.2128	0.216083	0.217192	0.215647	0.208388	0.211559	0.213508	0.212839	0.214022	0.213201	0.21388	0.208767	0.215946	0.210897	0.213118	0.215131	0.216517	0.213288	0.215638	0.215853	0.211133	0.212995	0.212068	0.212851	0.212937
3	LARP1_MOUSE|Q6ZQ58_S800	0.207554	0.208444	0.204228	0.212355	0.214315	0.216712	0.21355	0.214049	0.21382	0.2166	0.215696	0.212061	0.213134	0.208537	0.213886	0.214118	0.214841	0.210084	0.218131	0.215939	0.216911	0.214853	0.21218	0.213701	0.213857	0.212234	0.212242	0.211942	0.210302	0.213461	0.211392	0.210423	0.210376	0.214131	0.214074	0.213448	0.214614	0.213604	0.216388	0.214586	0.213786	0.21353	0.21589	0.214119
3	LARP4_MOUSE|Q8BWW4_T581	0.208506	0.202175	0.210331	0.213873	0.215442	0.218131	0.217114	0.213939	0.212214	0.215854	0.219229	0.207889	0.20928	0.205271	0.216573	0.215362	0.214261	0.212455	0.216754	0.214394	0.215091	0.215366	0.214677	0.212166	0.213194	0.213902	0.214485	0.21489	0.212267	0.21366	0.212664	0.212639	0.211391	0.211218	0.213707	0.213431	0.213489	0.215172	0.214502	0.213964	0.210904	0.21155	0.213183	0.213289
3	LIMA1_MOUSE|Q9ERG0_S283	0.213405	0.208624	0.213002	0.212852	0.213091	0.215001	0.215279	0.216742	0.208068	0.215566	0.21523	0.2116	0.2096	0.213847	0.215927	0.217365	0.212383	0.2142	0.215931	0.208746	0.212881	0.210716	0.212261	0.211214	0.217448	0.213646	0.21299	0.21378	0.213461	0.212964	0.211878	0.214632	0.213825	0.214168	0.211881	0.213465	0.214515	0.213447	0.213114	0.211706	0.21294	0.21169	0.212109	0.213194
3	LIMA1_MOUSE|Q9ERG0_S488	0.209828	0.208065	0.212174	0.210706	0.215323	0.216029	0.215197	0.211559	0.20993	0.215621	0.215501	0.21544	0.210123	0.209613	0.216105	0.216307	0.212126	0.213241	0.214664	0.214034	0.213126	0.215377	0.212261	0.211214	0.217448	0.213646	0.21299	0.21378	0.213461	0.212964	0.211878	0.214632	0.213825	0.214168	0.211881	0.213465	0.214515	0.213447	0.213114	0.211706	0.21294	0.21169	0.212109	0.213194
3	LIN9_MOUSE|Q8C735_S65	0.213845	0.213591	0.212206	0.213812	0.217383	0.21311	0.212095	0.217356	0.215963	0.210552	0.210897	0.206872	0.2125	0.215033	0.210679	0.212913	0.216354	0.217098	0.2125	0.211367	0.211534	0.212425	0.21494	0.216383	0.216664	0.215054	0.215043	0.216333	0.213452	0.214395	0.21419	0.213918	0.213215	0.213615	0.211714	0.212675	0.209891	0.211439	0.210321	0.209646	0.211374	0.21097	0.211772	0.213195
3	LIRB3_MOUSE|P97484_S685	0.207741	0.210617	0.206374	0.212436	0.215757	0.215298	0.214678	0.209438	0.213351	0.210878	0.210608	0.211344	0.213427	0.208819	0.217351	0.216545	0.219301	0.218241	0.216237	0.214808	0.215172	0.211396	0.208643	0.214362	0.214538	0.207954	0.213348	0.208491	0.209053	0.210054	0.213016	0.210396	0.209549	0.215204	0.21596	0.213951	0.214353	0.216408	0.2143	0.216899	0.215285	0.215471	0.216982	0.215751
3	LMBL2_MOUSE|P59178_S67	0.210845	0.225235	0.193964	0.21672	0.218054	0.218486	0.215422	0.213508	0.213378	0.21569	0.21442	0.214397	0.215056	0.208747	0.215553	0.21502	0.212646	0.207812	0.210882	0.211542	0.209798	0.21164	0.214587	0.216091	0.210605	0.215954	0.21749	0.215431	0.214142	0.215806	0.215721	0.215264	0.213042	0.211061	0.210205	0.213233	0.211913	0.210938	0.211811	0.212506	0.211627	0.209575	0.210847	0.212305
3	LMNA_MOUSE|P48678_S18	0.208951	0.204291	0.204637	0.215561	0.216455	0.216848	0.218227	0.211947	0.212762	0.212632	0.212533	0.211416	0.209403	0.209847	0.215512	0.217269	0.217705	0.218901	0.213701	0.214222	0.213925	0.212888	0.212927	0.211241	0.215571	0.214127	0.214078	0.214551	0.215349	0.212617	0.213826	0.214637	0.215063	0.213245	0.212853	0.21219	0.213407	0.212542	0.210384	0.21331	0.212262	0.211913	0.210306	0.213912
3	LMNA_MOUSE|P48678_S404	0.206639	0.205884	0.198483	0.212623	0.221744	0.216505	0.216104	0.208618	0.202816	0.208537	0.209209	0.229521	0.206213	0.208265	0.221132	0.236488	0.220577	0.228647	0.19092	0.20957	0.207818	0.218528	0.212927	0.211241	0.215571	0.214127	0.214078	0.214551	0.215349	0.212617	0.213826	0.214637	0.215063	0.213245	0.212853	0.21219	0.213407	0.212542	0.210384	0.21331	0.212262	0.211913	0.210306	0.213912
3	LMNA_MOUSE|P48678_S404_S407	0.203934	0.204317	0.211066	0.216118	0.215632	0.217451	0.221152	0.210332	0.200516	0.215071	0.212898	0.224007	0.200992	0.212785	0.221995	0.238276	0.21448	0.219501	0.193424	0.212754	0.209004	0.210328	0.212927	0.211241	0.215571	0.214127	0.214078	0.214551	0.215349	0.212617	0.213826	0.214637	0.215063	0.213245	0.212853	0.21219	0.213407	0.212542	0.210384	0.21331	0.212262	0.211913	0.210306	0.213912
3	LMNA_MOUSE|P48678_S406	0.208626	0.207524	0.205662	0.213788	0.217211	0.218868	0.219678	0.210432	0.201356	0.212501	0.213634	0.230055	0.207788	0.203629	0.217907	0.234592	0.217383	0.221641	0.191889	0.210498	0.207638	0.213859	0.212927	0.211241	0.215571	0.214127	0.214078	0.214551	0.215349	0.212617	0.213826	0.214637	0.215063	0.213245	0.212853	0.21219	0.213407	0.212542	0.210384	0.21331	0.212262	0.211913	0.210306	0.213912
3	LMNA_MOUSE|P48678_S426	0.209825	0.208092	0.215254	0.215905	0.205008	0.21715	0.217689	0.216347	0.204124	0.219808	0.217672	0.214654	0.200356	0.210981	0.215503	0.22844	0.206573	0.215725	0.209349	0.217286	0.208849	0.213904	0.212927	0.211241	0.215571	0.214127	0.214078	0.214551	0.215349	0.212617	0.213826	0.214637	0.215063	0.213245	0.212853	0.21219	0.213407	0.212542	0.210384	0.21331	0.212262	0.211913	0.210306	0.213912
3	LMNA_MOUSE|P48678_S653	0.211772	0.214142	0.211731	0.213742	0.214341	0.217749	0.215928	0.211973	0.215336	0.217467	0.214764	0.211579	0.212221	0.209816	0.215019	0.217181	0.213681	0.214658	0.211667	0.210403	0.205127	0.209682	0.212927	0.211241	0.215571	0.214127	0.214078	0.214551	0.215349	0.212617	0.213826	0.214637	0.215063	0.213245	0.212853	0.21219	0.213407	0.212542	0.210384	0.21331	0.212262	0.211913	0.210306	0.213912
3	LMNA_MOUSE|P48678_T19	0.205518	0.213051	0.212683	0.217232	0.220599	0.217113	0.215908	0.213204	0.212515	0.216753	0.215416	0.204568	0.204939	0.210797	0.217675	0.220939	0.212893	0.213312	0.212108	0.211543	0.209237	0.211421	0.212927	0.211241	0.215571	0.214127	0.214078	0.214551	0.215349	0.212617	0.213826	0.214637	0.215063	0.213245	0.212853	0.21219	0.213407	0.212542	0.210384	0.21331	0.212262	0.211913	0.210306	0.213912
3	LMNA_MOUSE|P48678_T548	0.209545	0.222026	0.209752	0.212681	0.213219	0.211694	0.213014	0.209533	0.21192	0.211342	0.212778	0.210219	0.21003	0.208146	0.214256	0.219652	0.211579	0.211812	0.220872	0.213074	0.216169	0.216411	0.212927	0.211241	0.215571	0.214127	0.214078	0.214551	0.215349	0.212617	0.213826	0.214637	0.215063	0.213245	0.212853	0.21219	0.213407	0.212542	0.210384	0.21331	0.212262	0.211913	0.210306	0.213912
3	LMNB1_MOUSE|P14733_S17_T21	0.214866	0.211208	0.21256	0.219077	0.220464	0.223382	0.224006	0.211205	0.210733	0.214845	0.213269	0.207042	0.205929	0.204516	0.217232	0.217673	0.216734	0.21678	0.210413	0.206387	0.203943	0.206409	0.215161	0.213564	0.217591	0.2159	0.216198	0.215013	0.215589	0.214803	0.217522	0.215357	0.21618	0.210644	0.210111	0.212611	0.210003	0.21077	0.210272	0.211132	0.210935	0.20923	0.210183	0.211265
3	LMNB1_MOUSE|P14733_S29	0.210686	0.209755	0.209806	0.217196	0.219018	0.216608	0.217251	0.216726	0.217308	0.218003	0.217181	0.206526	0.204897	0.206574	0.212875	0.212993	0.212818	0.213019	0.21271	0.211422	0.212305	0.213945	0.215161	0.213564	0.217591	0.2159	0.216198	0.215013	0.215589	0.214803	0.217522	0.215357	0.21618	0.210644	0.210111	0.212611	0.210003	0.21077	0.210272	0.211132	0.210935	0.20923	0.210183	0.211265
3	LMNB2_MOUSE|P21619_T421	0.200248	0.2139	0.213775	0.218726	0.218663	0.214877	0.214525	0.217927	0.217567	0.216893	0.214254	0.201686	0.20141	0.212838	0.213464	0.215413	0.212842	0.21343	0.214588	0.218618	0.209656	0.213683	0.214989	0.21341	0.217292	0.213583	0.215063	0.214954	0.216109	0.213708	0.215065	0.215979	0.21625	0.213829	0.211293	0.211331	0.21046	0.213128	0.209481	0.211299	0.210252	0.210705	0.210376	0.211593
3	LR75A_MOUSE|Q7TSF4_S322	0.2089	0.214775	0.206007	0.213508	0.217523	0.214342	0.213477	0.209346	0.214855	0.212106	0.211017	0.209703	0.208787	0.207499	0.216369	0.217169	0.219807	0.21517	0.213753	0.216369	0.215078	0.214226	0.213541	0.212816	0.214653	0.213373	0.214354	0.21263	0.212701	0.212788	0.214021	0.211682	0.214471	0.214706	0.213103	0.213451	0.210935	0.212196	0.212991	0.212775	0.212655	0.212737	0.214397	0.213391
3	LRC25_MOUSE|Q8K1T1_S211	0.205996	0.200716	0.21732	0.221266	0.218356	0.223487	0.221984	0.205695	0.211007	0.215405	0.210295	0.209393	0.213419	0.212727	0.219547	0.222212	0.2167	0.216822	0.205641	0.209635	0.205056	0.205557	0.209641	0.214038	0.213346	0.209568	0.209038	0.21041	0.212065	0.213095	0.211032	0.210899	0.20863	0.21591	0.217219	0.216812	0.214438	0.217386	0.213489	0.212038	0.215104	0.214527	0.214774	0.216581
3	LRC41_MOUSE|Q8K1C9_T327	0.206363	0.215368	0.211538	0.210751	0.216368	0.216663	0.215839	0.207883	0.205516	0.206485	0.207581	0.206639	0.205113	0.206805	0.22125	0.226463	0.22394	0.22184	0.218599	0.216015	0.210455	0.210871	0.211802	0.216925	0.216863	0.213574	0.212582	0.215833	0.211169	0.214196	0.211042	0.213544	0.213298	0.211908	0.212998	0.20972	0.214193	0.214456	0.211637	0.212382	0.212898	0.21354	0.214726	0.210958
3	LSP1_MOUSE|P19973_S195	0.210637	0.206441	0.211558	0.216045	0.21721	0.215309	0.213955	0.215352	0.215993	0.214855	0.212201	0.210408	0.210523	0.216007	0.212318	0.213403	0.214915	0.212843	0.212499	0.210134	0.215432	0.212041	0.21474	0.205325	0.211571	0.214803	0.215385	0.212198	0.212112	0.215875	0.215414	0.210364	0.211843	0.213246	0.213319	0.214491	0.211214	0.210501	0.217677	0.216074	0.210881	0.210505	0.216886	0.215591
3	M18BP_MOUSE|Q80WQ8_S134	0.207771	0.210623	0.209448	0.212293	0.224898	0.219017	0.215173	0.217002	0.2205	0.209734	0.209707	0.205337	0.206774	0.210751	0.209111	0.215072	0.216583	0.221805	0.209723	0.214722	0.208656	0.214382	0.213628	0.227472	0.221076	0.212882	0.217467	0.21407	0.210895	0.214535	0.215357	0.212506	0.211023	0.213902	0.211255	0.211093	0.212142	0.207044	0.205646	0.21171	0.211853	0.209731	0.210879	0.213246
3	M3K1_MOUSE|P53349_S518	0.210442	0.218927	0.216921	0.217135	0.221786	0.2155	0.217294	0.2119	0.210748	0.21273	0.212468	0.209201	0.204708	0.212117	0.217045	0.219204	0.212726	0.215589	0.208606	0.207835	0.207744	0.208807	0.217282	0.217732	0.218843	0.219052	0.219488	0.217872	0.215017	0.211861	0.214817	0.211718	0.213413	0.20907	0.210931	0.211303	0.212223	0.208823	0.21181	0.212813	0.209194	0.208159	0.207844	0.210448
3	M3K20_MOUSE|Q9ESL4_S650	0.205167	0.211131	0.201967	0.220598	0.215283	0.21714	0.216508	0.225088	0.2219	0.223882	0.229834	0.202993	0.206462	0.203647	0.212804	0.206322	0.205993	0.204385	0.219679	0.209563	0.213117	0.21376	0.212688	0.214068	0.215893	0.215469	0.213385	0.214798	0.21615	0.21454	0.214802	0.212736	0.214899	0.213982	0.212865	0.21247	0.211808	0.210345	0.210659	0.212917	0.212557	0.211177	0.210822	0.211234
3	M3K3_MOUSE|Q61084_S166	0.207455	0.21485	0.20857	0.214588	0.214576	0.211031	0.211886	0.212623	0.212536	0.210957	0.212515	0.209668	0.210077	0.217573	0.214827	0.216094	0.214959	0.213491	0.215016	0.218309	0.213031	0.2154	0.214358	0.211277	0.215266	0.21315	0.2146	0.212757	0.214667	0.21184	0.215192	0.214196	0.216633	0.213278	0.211898	0.214724	0.21186	0.212318	0.210915	0.213811	0.212565	0.212404	0.210854	0.21173
3	M3K3_MOUSE|Q61084_S337	0.208474	0.210853	0.215939	0.210797	0.214327	0.213907	0.214194	0.211853	0.213624	0.211133	0.216004	0.210499	0.211969	0.210074	0.214397	0.216244	0.214341	0.212784	0.215406	0.215517	0.214089	0.213758	0.214358	0.211277	0.215266	0.21315	0.2146	0.212757	0.214667	0.21184	0.215192	0.214196	0.216633	0.213278	0.211898	0.214724	0.21186	0.212318	0.210915	0.213811	0.212565	0.212404	0.210854	0.21173
3	M3K7_MOUSE|Q62073_S428	0.211774	0.214369	0.211532	0.215102	0.217397	0.220565	0.220316	0.205292	0.210595	0.215638	0.21024	0.215495	0.214721	0.204313	0.216794	0.214038	0.214212	0.213658	0.21239	0.212785	0.207475	0.210878	0.214836	0.214365	0.215934	0.214816	0.214867	0.212731	0.212456	0.212458	0.213686	0.214641	0.213889	0.211073	0.212466	0.216507	0.212381	0.212224	0.211855	0.211158	0.212648	0.211959	0.211324	0.212021
3	M4K3_MOUSE|Q99JP0_S398	0.212439	0.209568	0.210033	0.213704	0.212264	0.221926	0.217139	0.209764	0.215662	0.213943	0.217786	0.212673	0.211899	0.215632	0.214392	0.216022	0.21093	0.210083	0.213072	0.213973	0.207226	0.209732	0.211222	0.211279	0.214621	0.215454	0.209935	0.21318	0.214671	0.21508	0.212908	0.212863	0.214431	0.212556	0.210236	0.212375	0.214939	0.214053	0.213204	0.213049	0.214681	0.211889	0.212981	0.214685
3	MACF1_MOUSE|Q9QXZ0_S3889	0.207027	0.205825	0.207474	0.211077	0.212334	0.212919	0.211679	0.21335	0.214704	0.215355	0.214265	0.209171	0.210618	0.208233	0.215569	0.216738	0.215419	0.216109	0.218126	0.217701	0.21826	0.217734	0.213075	0.214265	0.214594	0.213677	0.213841	0.21416	0.213638	0.213793	0.213307	0.214299	0.213196	0.213082	0.212525	0.21299	0.213214	0.211912	0.211608	0.212729	0.21305	0.212683	0.212472	0.212277
3	MADD_MOUSE|Q80U28_S1058	0.20754	0.214333	0.204533	0.212868	0.212156	0.208919	0.211064	0.215259	0.214356	0.211338	0.212529	0.209912	0.2134	0.213507	0.212328	0.215911	0.214684	0.214759	0.217004	0.218613	0.219097	0.215718	0.213231	0.2161	0.218466	0.211018	0.214287	0.211431	0.213208	0.212486	0.212632	0.212037	0.211993	0.214899	0.213171	0.21359	0.212279	0.213109	0.212098	0.213828	0.212689	0.212693	0.212034	0.213004
3	MADD_MOUSE|Q80U28_T1060	0.2095	0.209662	0.208118	0.211125	0.208813	0.209892	0.212303	0.212047	0.210932	0.214237	0.213529	0.212599	0.210541	0.21243	0.215522	0.217973	0.214683	0.214925	0.218359	0.218746	0.217547	0.216408	0.213231	0.2161	0.218466	0.211018	0.214287	0.211431	0.213208	0.212486	0.212632	0.212037	0.211993	0.214899	0.213171	0.21359	0.212279	0.213109	0.212098	0.213828	0.212689	0.212693	0.212034	0.213004
3	MAP1S_MOUSE|Q8C052_S660	0.214573	0.215537	0.1945	0.21151	0.217643	0.216592	0.2136	0.210554	0.211578	0.214341	0.213101	0.213542	0.212765	0.211296	0.21486	0.218191	0.212988	0.214779	0.2141	0.214486	0.211527	0.217276	0.213937	0.212897	0.216836	0.212804	0.214106	0.2143	0.213741	0.212659	0.214263	0.2119	0.212538	0.212498	0.214374	0.213424	0.211729	0.213031	0.212467	0.213373	0.211952	0.21259	0.211598	0.213331
3	MAP1S_MOUSE|Q8C052_S688	0.204201	0.208949	0.206636	0.214676	0.218485	0.213417	0.214001	0.211727	0.215349	0.21161	0.211855	0.206287	0.205055	0.210764	0.217882	0.220032	0.219521	0.220539	0.215715	0.214448	0.214985	0.21316	0.213937	0.212897	0.216836	0.212804	0.214106	0.2143	0.213741	0.212659	0.214263	0.2119	0.212538	0.212498	0.214374	0.213424	0.211729	0.213031	0.212467	0.213373	0.211952	0.21259	0.211598	0.213331
3	MAP4_MOUSE|P27546_S519	0.210727	0.211816	0.209557	0.210843	0.211711	0.213129	0.212415	0.213472	0.212481	0.215811	0.214388	0.211275	0.21183	0.207936	0.214283	0.215445	0.214174	0.212518	0.216536	0.217589	0.217573	0.214601	0.2143	0.214843	0.216916	0.210867	0.212348	0.214173	0.211583	0.213583	0.212314	0.212505	0.211799	0.213567	0.214088	0.210872	0.212932	0.213679	0.214404	0.213198	0.212296	0.213771	0.214204	0.212076
3	MAP4_MOUSE|P27546_T503	0.207566	0.211349	0.207006	0.215008	0.215059	0.214546	0.2151	0.212211	0.207212	0.213898	0.212772	0.207069	0.210693	0.207004	0.219564	0.22112	0.21666	0.216832	0.219025	0.212083	0.215682	0.212072	0.2143	0.214843	0.216916	0.210867	0.212348	0.214173	0.211583	0.213583	0.212314	0.212505	0.211799	0.213567	0.214088	0.210872	0.212932	0.213679	0.214404	0.213198	0.212296	0.213771	0.214204	0.212076
3	MAP4_MOUSE|P27546_T846	0.209348	0.213279	0.210603	0.212371	0.213902	0.213906	0.212893	0.214962	0.214738	0.213778	0.212983	0.207701	0.210436	0.207986	0.215201	0.216968	0.216234	0.21585	0.214526	0.214815	0.214341	0.213281	0.2143	0.214843	0.216916	0.210867	0.212348	0.214173	0.211583	0.213583	0.212314	0.212505	0.211799	0.213567	0.214088	0.210872	0.212932	0.213679	0.214404	0.213198	0.212296	0.213771	0.214204	0.212076
3	MAP4_MOUSE|P27546_T847	0.208269	0.212275	0.214546	0.212996	0.215066	0.215182	0.211873	0.215899	0.214653	0.21341	0.213864	0.207183	0.210168	0.207427	0.21421	0.216713	0.215612	0.215297	0.213633	0.214051	0.214295	0.21344	0.2143	0.214843	0.216916	0.210867	0.212348	0.214173	0.211583	0.213583	0.212314	0.212505	0.211799	0.213567	0.214088	0.210872	0.212932	0.213679	0.214404	0.213198	0.212296	0.213771	0.214204	0.212076
3	MAP4_MOUSE|P27546_T849	0.20688	0.213056	0.210186	0.211863	0.210441	0.218493	0.214586	0.215008	0.210396	0.214577	0.211409	0.210507	0.206858	0.204207	0.218702	0.219066	0.214583	0.215902	0.219065	0.21435	0.215082	0.214383	0.2143	0.214843	0.216916	0.210867	0.212348	0.214173	0.211583	0.213583	0.212314	0.212505	0.211799	0.213567	0.214088	0.210872	0.212932	0.213679	0.214404	0.213198	0.212296	0.213771	0.214204	0.212076
3	MAPK2_MOUSE|P49138_T320	0.212166	0.203809	0.20193	0.211979	0.213495	0.221343	0.219738	0.209594	0.213336	0.212694	0.214203	0.209581	0.20916	0.208756	0.214894	0.220061	0.219543	0.218635	0.215703	0.218193	0.208735	0.211547	0.212847	0.210603	0.215766	0.211644	0.212786	0.210892	0.21238	0.213915	0.214968	0.213772	0.214521	0.213753	0.213361	0.216634	0.212078	0.212057	0.21309	0.21268	0.212954	0.213591	0.212775	0.213246
3	MARF1_MOUSE|Q8BJ34_S65	0.209341	0.216019	0.217275	0.211805	0.217414	0.212338	0.213942	0.210233	0.212709	0.213604	0.211746	0.211811	0.210658	0.214279	0.214254	0.216868	0.212653	0.213122	0.213136	0.213553	0.211206	0.212214	0.216423	0.214635	0.216363	0.213699	0.213576	0.213569	0.213242	0.212014	0.211141	0.212727	0.212942	0.213297	0.211491	0.213926	0.212971	0.212869	0.213627	0.21144	0.213457	0.211788	0.213227	0.2119
3	MARK2_MOUSE|Q05512_S40	0.20412	0.211748	0.211538	0.21102	0.215618	0.216455	0.219641	0.212571	0.213897	0.210444	0.214789	0.203848	0.204818	0.210879	0.218822	0.222717	0.212495	0.21573	0.216346	0.2175	0.211073	0.213206	0.211475	0.216075	0.216382	0.211254	0.214168	0.211879	0.211071	0.212485	0.211896	0.21161	0.212606	0.214612	0.212744	0.211077	0.213625	0.213473	0.213122	0.214704	0.21303	0.214567	0.214133	0.214309
3	MAST2_MOUSE|Q60592_S1546	0.207371	0.214857	0.209001	0.214097	0.217818	0.217352	0.215732	0.212343	0.211992	0.2129	0.21534	0.207131	0.206062	0.214167	0.215938	0.221706	0.21432	0.212997	0.214143	0.214768	0.207508	0.212137	0.214681	0.215787	0.220489	0.214417	0.214176	0.212574	0.213713	0.209798	0.211563	0.210289	0.212975	0.213124	0.213956	0.212993	0.213119	0.214673	0.212923	0.213942	0.209564	0.212736	0.210236	0.212419
3	MAST2_MOUSE|Q60592_S970	0.211452	0.216044	0.210339	0.216016	0.217644	0.212684	0.212549	0.213954	0.215587	0.210989	0.209425	0.210014	0.211072	0.217188	0.212362	0.213265	0.21437	0.214823	0.21063	0.213444	0.213444	0.21285	0.214681	0.215787	0.220489	0.214417	0.214176	0.212574	0.213713	0.209798	0.211563	0.210289	0.212975	0.213124	0.213956	0.212993	0.213119	0.214673	0.212923	0.213942	0.209564	0.212736	0.210236	0.212419
3	MAST3_MOUSE|Q3U214_T1314	0.202386	0.21229	0.216225	0.217427	0.211934	0.208044	0.210491	0.212673	0.21386	0.211041	0.209142	0.20556	0.20729	0.210909	0.223039	0.20874	0.221212	0.210271	0.219847	0.217117	0.226955	0.212229	0.212536	0.214862	0.217546	0.212404	0.213245	0.21065	0.212892	0.214193	0.211431	0.209702	0.210696	0.214403	0.214346	0.216714	0.213013	0.211961	0.214366	0.215729	0.211577	0.214399	0.212293	0.211258
3	MATR3_MOUSE|Q8K310_S596	0.209317	0.210583	0.203427	0.219634	0.218293	0.215029	0.214789	0.215268	0.210116	0.20883	0.209553	0.207544	0.209317	0.21289	0.21532	0.218757	0.22061	0.219245	0.210242	0.213848	0.214696	0.212116	0.212935	0.211579	0.214435	0.215162	0.213775	0.214858	0.213592	0.214942	0.213343	0.214385	0.213306	0.212956	0.211498	0.214026	0.212735	0.212046	0.212505	0.212262	0.211738	0.212579	0.212266	0.213432
3	MCES_MOUSE|Q9D0L8_T34	0.215798	0.211941	0.209265	0.214385	0.218387	0.216186	0.216679	0.211844	0.210654	0.215645	0.21214	0.212529	0.212124	0.213956	0.213591	0.217512	0.215551	0.211882	0.21041	0.209217	0.210069	0.210279	0.212609	0.210972	0.213883	0.212078	0.21472	0.213121	0.213552	0.212569	0.214693	0.212643	0.212724	0.212283	0.213407	0.212893	0.212957	0.213749	0.214174	0.213962	0.212579	0.213306	0.213651	0.213852
3	MCM2_MOUSE|P97310_S26	0.202397	0.22125	0.224068	0.217425	0.220533	0.20853	0.212816	0.213262	0.216065	0.215612	0.213341	0.196459	0.196862	0.224745	0.217622	0.219653	0.206404	0.208083	0.21449	0.215389	0.210953	0.21156	0.214889	0.214955	0.215772	0.21559	0.213575	0.215642	0.215324	0.214552	0.214294	0.214369	0.215109	0.212971	0.210805	0.212743	0.211506	0.211445	0.210108	0.212104	0.212031	0.210974	0.210556	0.210917
3	MCRS1_MOUSE|Q99L90_T103	0.211751	0.216355	0.21341	0.212421	0.216724	0.218192	0.214126	0.215306	0.215156	0.215519	0.214226	0.209047	0.210635	0.208414	0.21123	0.217177	0.213889	0.214233	0.212234	0.211939	0.208278	0.209751	0.214286	0.215267	0.21829	0.213578	0.214918	0.212764	0.210776	0.214796	0.213844	0.211601	0.210855	0.210478	0.211746	0.213432	0.211271	0.21134	0.213422	0.215573	0.213156	0.212435	0.2129	0.213512
3	MDFIC_MOUSE|Q8BX65_S28	0.208225	0.212016	0.205254	0.210468	0.209714	0.211047	0.210173	0.222872	0.219725	0.223969	0.222029	0.205863	0.204943	0.204048	0.210045	0.209516	0.209251	0.20745	0.221872	0.220705	0.219528	0.219494	0.219495	0.219942	0.218216	0.211164	0.216618	0.212053	0.211814	0.211313	0.2164	0.212428	0.213474	0.214847	0.212597	0.210797	0.212115	0.206914	0.209335	0.210826	0.212984	0.207654	0.212562	0.216272
3	MED1_MOUSE|Q925J9_S1209	0.212595	0.20958	0.210761	0.216756	0.215018	0.214966	0.215425	0.211902	0.210078	0.212531	0.209794	0.215584	0.21295	0.216648	0.214757	0.215747	0.214994	0.217155	0.21066	0.210094	0.210273	0.211824	0.213486	0.213027	0.216784	0.214916	0.213364	0.214819	0.213957	0.214651	0.213426	0.213989	0.213467	0.212927	0.212441	0.21362	0.212524	0.212601	0.21199	0.212699	0.211322	0.211333	0.211515	0.211468
3	MED14_MOUSE|A2ABV5_S1117	0.212413	0.215325	0.207295	0.214873	0.213486	0.213356	0.212711	0.213802	0.211708	0.211674	0.21132	0.211291	0.211274	0.210755	0.216982	0.214472	0.217579	0.216308	0.215182	0.211577	0.214098	0.21266	0.214058	0.219358	0.208198	0.213074	0.212356	0.213642	0.211158	0.213776	0.211919	0.211975	0.212569	0.212871	0.213484	0.212415	0.215516	0.212268	0.213862	0.212094	0.215097	0.21333	0.213485	0.21371
3	MEF2A_MOUSE|Q60929_S406	0.210121	0.212069	0.212309	0.215244	0.212985	0.213125	0.212466	0.212415	0.210654	0.212233	0.212491	0.211059	0.211716	0.213361	0.215755	0.214821	0.21642	0.214242	0.214468	0.215602	0.21303	0.213689	0.210383	0.210472	0.237157	0.213533	0.212842	0.209371	0.214066	0.211778	0.210182	0.20859	0.222084	0.20892	0.213064	0.200493	0.213099	0.213247	0.210102	0.225308	0.21299	0.211814	0.205284	0.213018
3	MICA3_MOUSE|Q8CJ19_S1276	0.209075	0.204608	0.21045	0.216463	0.223298	0.220784	0.219638	0.219288	0.222709	0.220936	0.218762	0.205629	0.20871	0.20561	0.209784	0.210003	0.211934	0.21195	0.20938	0.209132	0.209339	0.211199	0.21353	0.214111	0.215601	0.21329	0.213799	0.213737	0.214153	0.213266	0.215591	0.212724	0.213393	0.212112	0.212796	0.213745	0.212117	0.211066	0.211271	0.212272	0.212367	0.213841	0.212336	0.213236
3	MID51_MOUSE|Q8BGV8_S59	0.208189	0.212505	0.211155	0.213554	0.215884	0.2152	0.213181	0.213927	0.214346	0.215926	0.213989	0.207099	0.209025	0.212752	0.215607	0.21667	0.214214	0.213343	0.215218	0.214468	0.211715	0.212138	0.210171	0.213682	0.218696	0.21728	0.215078	0.215206	0.213471	0.209843	0.213014	0.213872	0.213313	0.213148	0.212719	0.216241	0.214781	0.213203	0.212264	0.209043	0.210866	0.211973	0.211856	0.21041
3	MILK2_MOUSE|Q3TN34_S558	0.207419	0.207379	0.211541	0.211134	0.207844	0.213966	0.217141	0.219167	0.21092	0.21289	0.214035	0.211831	0.213802	0.209623	0.215348	0.214439	0.214917	0.216068	0.215407	0.218756	0.2142	0.212047	0.213687	0.212422	0.216258	0.214227	0.211951	0.213046	0.212886	0.214546	0.212914	0.213526	0.212792	0.213453	0.212745	0.213468	0.213616	0.212494	0.213393	0.213415	0.212072	0.211723	0.212509	0.213226
3	MINT_MOUSE|Q62504_S1074	0.204697	0.210729	0.208584	0.210898	0.214581	0.217367	0.214497	0.216523	0.221858	0.216989	0.217703	0.205552	0.204244	0.209175	0.209544	0.215233	0.21463	0.211371	0.216486	0.222804	0.212431	0.213283	0.213853	0.215032	0.215861	0.212313	0.214266	0.212365	0.21067	0.214776	0.217013	0.212267	0.21314	0.210699	0.211361	0.21174	0.212086	0.211035	0.213497	0.214275	0.212733	0.212753	0.214861	0.213678
3	MINT_MOUSE|Q62504_S2491	0.214772	0.212485	0.202454	0.213808	0.216638	0.215312	0.214211	0.212821	0.212227	0.213826	0.209885	0.213972	0.215432	0.212921	0.214417	0.214816	0.218	0.212119	0.209768	0.212788	0.215654	0.211612	0.213853	0.215032	0.215861	0.212313	0.214266	0.212365	0.21067	0.214776	0.217013	0.212267	0.21314	0.210699	0.211361	0.21174	0.212086	0.211035	0.213497	0.214275	0.212733	0.212753	0.214861	0.213678
3	MK08_MOUSE|Q91Y86_S377	0.211993	0.211156	0.211045	0.214591	0.217124	0.215518	0.216744	0.211607	0.212112	0.214922	0.214102	0.209524	0.211937	0.21122	0.215553	0.215636	0.214119	0.212368	0.212963	0.212508	0.211649	0.211814	0.211934	0.208252	0.213906	0.213065	0.213562	0.213711	0.215058	0.214695	0.212968	0.217759	0.21226	0.213918	0.216052	0.212302	0.211365	0.212803	0.213041	0.214708	0.213003	0.212825	0.210834	0.212213
3	MK67I_MOUSE|Q91VE6_S250	0.21328	0.201819	0.201988	0.21255	0.212057	0.225556	0.221659	0.209263	0.213462	0.209965	0.207152	0.212518	0.21266	0.199935	0.21689	0.214212	0.229055	0.224379	0.217053	0.215207	0.205922	0.211049	0.213416	0.214285	0.21396	0.215429	0.213463	0.214954	0.214147	0.213873	0.212388	0.214847	0.212511	0.212093	0.211299	0.211698	0.214099	0.21227	0.213564	0.213555	0.213871	0.211638	0.211412	0.211568
3	MKL2_MOUSE|P59759_S537	0.206768	0.207754	0.208468	0.212883	0.212981	0.21187	0.212505	0.215596	0.2163	0.21678	0.218107	0.209267	0.209323	0.206058	0.213251	0.211832	0.212882	0.211537	0.218758	0.218251	0.219044	0.21935	0.21308	0.210225	0.217024	0.214196	0.214039	0.213836	0.213202	0.213928	0.213627	0.21414	0.214463	0.212607	0.211461	0.213489	0.212566	0.21376	0.214315	0.212388	0.210531	0.212578	0.213249	0.211605
3	MKL2_MOUSE|P59759_S539	0.204878	0.208695	0.214601	0.212458	0.209636	0.211563	0.213409	0.217016	0.213972	0.209797	0.216211	0.210068	0.210716	0.21404	0.214057	0.212744	0.218659	0.213973	0.217808	0.219616	0.212878	0.213028	0.21308	0.210225	0.217024	0.214196	0.214039	0.213836	0.213202	0.213928	0.213627	0.21414	0.214463	0.212607	0.211461	0.213489	0.212566	0.21376	0.214315	0.212388	0.210531	0.212578	0.213249	0.211605
3	MKNK1_MOUSE|O08605_S39	0.207578	0.211911	0.209048	0.214859	0.213868	0.210162	0.212154	0.215465	0.213575	0.212142	0.212359	0.208959	0.20844	0.21623	0.212864	0.217168	0.215531	0.214094	0.216315	0.215606	0.217184	0.21449	0.214453	0.212297	0.21618	0.211744	0.213585	0.212798	0.215602	0.212085	0.214049	0.211985	0.212827	0.213766	0.212341	0.216728	0.213649	0.214257	0.214427	0.210299	0.211846	0.211444	0.213115	0.210799
3	MLH1_MOUSE|Q9JK91_S481	0.211541	0.217108	0.206648	0.217032	0.218433	0.217515	0.217622	0.210038	0.214563	0.2112	0.216236	0.210798	0.209468	0.210734	0.216148	0.215112	0.215351	0.212688	0.214872	0.208298	0.209021	0.209359	0.216425	0.213646	0.220356	0.216017	0.215143	0.215601	0.215289	0.21484	0.214781	0.215162	0.215058	0.209478	0.209152	0.21371	0.211699	0.211766	0.211068	0.211585	0.21169	0.20839	0.210401	0.208709
3	MOES_MOUSE|P26041_S468	0.20793	0.206785	0.210106	0.211775	0.213943	0.217607	0.215879	0.209134	0.21141	0.211527	0.214024	0.214214	0.215595	0.210157	0.212514	0.219246	0.216511	0.213459	0.216067	0.215878	0.21305	0.213113	0.212604	0.208794	0.215236	0.212885	0.212291	0.212582	0.213422	0.211511	0.213147	0.21139	0.213645	0.21404	0.214123	0.215921	0.213111	0.213188	0.213594	0.214829	0.214259	0.213439	0.212438	0.21386
3	MON1A_MOUSE|Q6PDG8_S10	0.210563	0.210574	0.211818	0.20842	0.215851	0.215841	0.217101	0.209901	0.212288	0.212967	0.216357	0.214853	0.215302	0.207011	0.215061	0.21652	0.213978	0.212704	0.213958	0.214052	0.213283	0.211652	0.211999	0.213941	0.210422	0.21037	0.212467	0.213444	0.214497	0.212664	0.212385	0.212942	0.213526	0.215622	0.212919	0.213763	0.212896	0.214184	0.212522	0.210326	0.214106	0.216765	0.216969	0.211527
3	MON2_MOUSE|Q80TL7_S1213	0.21172	0.213911	0.208035	0.2159	0.211594	0.214309	0.21352	0.215341	0.208453	0.21179	0.209631	0.212015	0.212025	0.214728	0.214794	0.218765	0.216319	0.215383	0.210022	0.216391	0.213149	0.212254	0.213808	0.216977	0.211146	0.213588	0.213224	0.212559	0.211951	0.212962	0.212894	0.212487	0.211612	0.212734	0.213025	0.214849	0.212919	0.213495	0.213115	0.213761	0.213696	0.213764	0.214206	0.211568
3	MORC3_MOUSE|F7BJB9_S521	0.211666	0.209944	0.212097	0.21219	0.21469	0.214613	0.216127	0.209037	0.214399	0.208666	0.213872	0.20843	0.208765	0.209108	0.215818	0.223259	0.217418	0.221231	0.212414	0.212493	0.210631	0.212785	0.213594	0.21172	0.213143	0.212925	0.213128	0.211	0.21256	0.21195	0.211584	0.210708	0.212183	0.214256	0.214703	0.214942	0.214523	0.213739	0.215229	0.21449	0.2129	0.212643	0.214837	0.213574
3	MOT10_MOUSE|Q3U9N9_S500	0.201514	0.217159	0.213288	0.219341	0.221223	0.219218	0.215931	0.211683	0.211199	0.215182	0.212363	0.203682	0.207228	0.212671	0.217289	0.223866	0.210858	0.21267	0.212848	0.211587	0.207541	0.210638	0.212225	0.219637	0.213585	0.21116	0.212533	0.212243	0.209088	0.213004	0.212308	0.211771	0.209867	0.215418	0.216057	0.214578	0.212812	0.211588	0.211819	0.212589	0.214634	0.214581	0.214512	0.214159
3	MPP8_MOUSE|Q3TYA6_S379	0.21085	0.214536	0.21237	0.217975	0.215542	0.218265	0.216039	0.211566	0.205674	0.211051	0.207342	0.213564	0.214936	0.214381	0.218062	0.222089	0.218567	0.217854	0.209706	0.205961	0.20739	0.205564	0.212305	0.21481	0.21653	0.212786	0.212757	0.212722	0.211894	0.213052	0.211779	0.211824	0.209633	0.214419	0.213337	0.21515	0.214211	0.213315	0.214458	0.21514	0.213108	0.212486	0.212007	0.212579
3	MPRI_MOUSE|Q07113_S2337	0.207172	0.217929	0.213361	0.212578	0.211785	0.214595	0.212945	0.214143	0.210054	0.216908	0.213103	0.209808	0.206114	0.215407	0.217213	0.217584	0.210521	0.209366	0.218816	0.216021	0.212709	0.211691	0.212832	0.220165	0.213832	0.213231	0.212084	0.214037	0.211348	0.214347	0.211404	0.214668	0.211893	0.214325	0.213325	0.210155	0.213071	0.212423	0.209966	0.21297	0.214485	0.213321	0.211554	0.214765
3	MPRIP_MOUSE|P97434_S617	0.206954	0.210339	0.210955	0.214556	0.219618	0.218356	0.217004	0.210268	0.214471	0.214247	0.212691	0.209214	0.208154	0.213377	0.215289	0.219093	0.215969	0.213196	0.212885	0.213005	0.210322	0.209853	0.214151	0.211335	0.217558	0.215018	0.21443	0.215356	0.215734	0.215553	0.215258	0.215463	0.215205	0.212643	0.211561	0.212256	0.210838	0.210811	0.209891	0.211004	0.211217	0.21061	0.211593	0.212691
3	MPRIP_MOUSE|P97434_S976	0.206341	0.20827	0.209703	0.214509	0.214562	0.214405	0.214061	0.217037	0.215803	0.218201	0.218367	0.205768	0.209835	0.209193	0.213627	0.210948	0.211745	0.211126	0.219424	0.217048	0.214627	0.215074	0.214151	0.211335	0.217558	0.215018	0.21443	0.215356	0.215734	0.215553	0.215258	0.215463	0.215205	0.212643	0.211561	0.212256	0.210838	0.210811	0.209891	0.211004	0.211217	0.21061	0.211593	0.212691
3	MTA1_MOUSE|Q8K4B0_S522	0.211761	0.215096	0.212303	0.214979	0.219291	0.216117	0.214008	0.214405	0.21731	0.216765	0.213785	0.207444	0.209183	0.208899	0.210729	0.213517	0.213009	0.212158	0.211993	0.212841	0.213071	0.21136	0.212776	0.216813	0.216651	0.213388	0.213035	0.213859	0.213256	0.21558	0.214929	0.214161	0.212678	0.211816	0.21217	0.211115	0.212276	0.212598	0.211996	0.212358	0.21275	0.211588	0.213054	0.211446
3	MTM1_MOUSE|Q9Z2C5_S13	0.206594	0.213012	0.211591	0.21377	0.215421	0.211857	0.212503	0.210249	0.212168	0.209372	0.211113	0.208792	0.209736	0.215269	0.217536	0.221606	0.21709	0.217513	0.213183	0.214938	0.213254	0.213274	0.212455	0.210292	0.208157	0.212062	0.213837	0.213574	0.213218	0.210053	0.213424	0.212489	0.212273	0.213834	0.216373	0.213696	0.214124	0.214059	0.212943	0.215546	0.21394	0.21507	0.214802	0.214025
3	MY18A_MOUSE|Q9JMH9_S728	0.20556	0.205715	0.214932	0.211089	0.220094	0.216017	0.212753	0.215316	0.217799	0.212324	0.21053	0.203954	0.210696	0.212028	0.214285	0.217269	0.216629	0.219163	0.212363	0.21423	0.213663	0.213138	0.211953	0.211632	0.215273	0.21227	0.212268	0.212037	0.212629	0.212012	0.211786	0.211606	0.212246	0.214506	0.214613	0.2154	0.213669	0.214161	0.213789	0.213824	0.213438	0.214167	0.213651	0.213415
3	MYCB2_MOUSE|Q7TPH6_S3512	0.207826	0.211015	0.209445	0.21215	0.208321	0.217051	0.212072	0.209143	0.203903	0.21399	0.212979	0.2122	0.215536	0.212703	0.216539	0.219896	0.217574	0.211135	0.220486	0.221774	0.212232	0.211487	0.213304	0.215965	0.216038	0.212452	0.212908	0.213202	0.211584	0.212807	0.211817	0.211956	0.211372	0.213817	0.213427	0.212742	0.214169	0.212729	0.213595	0.213874	0.213238	0.2132	0.213531	0.212619
3	MYO9A_MOUSE|Q8C170_S1300	0.209391	0.213998	0.208607	0.213999	0.213185	0.214452	0.211219	0.213691	0.209554	0.210785	0.209395	0.210234	0.213655	0.212529	0.216724	0.217898	0.216719	0.21712	0.214701	0.214515	0.215303	0.212372	0.211972	0.216701	0.217978	0.21173	0.211693	0.212581	0.210455	0.212453	0.212699	0.211054	0.210057	0.214139	0.214124	0.211461	0.212848	0.213206	0.214172	0.214262	0.213467	0.214861	0.214293	0.214032
3	MYO9A_MOUSE|Q8C170_S1359	0.206709	0.213823	0.211927	0.211239	0.213627	0.213878	0.213179	0.214278	0.210838	0.214645	0.213858	0.209182	0.20903	0.209527	0.216915	0.218744	0.214745	0.214171	0.217954	0.215035	0.213482	0.213212	0.211972	0.216701	0.217978	0.21173	0.211693	0.212581	0.210455	0.212453	0.212699	0.211054	0.210057	0.214139	0.214124	0.211461	0.212848	0.213206	0.214172	0.214262	0.213467	0.214861	0.214293	0.214032
3	MYO9B_MOUSE|Q9QY06_S1106	0.208814	0.216735	0.209479	0.215221	0.214879	0.214413	0.213394	0.213709	0.213472	0.213216	0.212509	0.208711	0.210845	0.209644	0.214826	0.215668	0.214777	0.214013	0.215854	0.213755	0.214678	0.211531	0.21238	0.217291	0.215296	0.211846	0.21235	0.212254	0.212547	0.212608	0.212523	0.210913	0.211806	0.213948	0.214996	0.212411	0.213201	0.213666	0.214192	0.212833	0.213046	0.214446	0.213133	0.212634
3	MYO9B_MOUSE|Q9QY06_S1264	0.207104	0.21126	0.207333	0.214249	0.215327	0.2145	0.214444	0.215631	0.215228	0.211912	0.213742	0.20727	0.212855	0.207288	0.216174	0.21475	0.215438	0.216635	0.214269	0.214872	0.215144	0.21451	0.21238	0.217291	0.215296	0.211846	0.21235	0.212254	0.212547	0.212608	0.212523	0.210913	0.211806	0.213948	0.214996	0.212411	0.213201	0.213666	0.214192	0.212833	0.213046	0.214446	0.213133	0.212634
3	MYO9B_MOUSE|Q9QY06_T1317	0.20268	0.214986	0.208193	0.216905	0.217009	0.212988	0.211704	0.218205	0.215058	0.211043	0.210623	0.205	0.211725	0.211637	0.215528	0.215929	0.216084	0.215533	0.214861	0.213699	0.215874	0.214404	0.21238	0.217291	0.215296	0.211846	0.21235	0.212254	0.212547	0.212608	0.212523	0.210913	0.211806	0.213948	0.214996	0.212411	0.213201	0.213666	0.214192	0.212833	0.213046	0.214446	0.213133	0.212634
3	MYO9B_MOUSE|Q9QY06_T1319	0.20189	0.215257	0.207091	0.215247	0.215708	0.213577	0.211445	0.214772	0.212747	0.210857	0.210749	0.206336	0.209911	0.210513	0.217379	0.21925	0.217979	0.215709	0.216367	0.216571	0.21594	0.214241	0.21238	0.217291	0.215296	0.211846	0.21235	0.212254	0.212547	0.212608	0.212523	0.210913	0.211806	0.213948	0.214996	0.212411	0.213201	0.213666	0.214192	0.212833	0.213046	0.214446	0.213133	0.212634
3	MYPT1_MOUSE|Q9DBR7_S445	0.20987	0.211425	0.215812	0.215541	0.21492	0.215712	0.216124	0.211268	0.211624	0.212794	0.212886	0.21198	0.215951	0.211231	0.216363	0.214709	0.215099	0.214034	0.212752	0.210162	0.211497	0.208389	0.212057	0.20935	0.216407	0.2139	0.214441	0.214058	0.212961	0.21381	0.213813	0.213237	0.212439	0.213136	0.211616	0.214536	0.213036	0.212876	0.213266	0.214074	0.212166	0.211916	0.214137	0.21309
3	MYPT1_MOUSE|Q9DBR7_S507	0.204604	0.213181	0.216169	0.213031	0.216687	0.211444	0.209532	0.216106	0.212811	0.213517	0.210268	0.206341	0.207706	0.218276	0.21415	0.218699	0.215695	0.214831	0.21482	0.21569	0.213467	0.21273	0.212057	0.20935	0.216407	0.2139	0.214441	0.214058	0.212961	0.21381	0.213813	0.213237	0.212439	0.213136	0.211616	0.214536	0.213036	0.212876	0.213266	0.214074	0.212166	0.211916	0.214137	0.21309
3	MYPT1_MOUSE|Q9DBR7_S509	0.204673	0.211487	0.209561	0.211292	0.2144	0.215501	0.214841	0.213387	0.212902	0.214042	0.213565	0.207455	0.204627	0.215268	0.217321	0.22094	0.214237	0.21193	0.217037	0.218315	0.214185	0.212665	0.212057	0.20935	0.216407	0.2139	0.214441	0.214058	0.212961	0.21381	0.213813	0.213237	0.212439	0.213136	0.211616	0.214536	0.213036	0.212876	0.213266	0.214074	0.212166	0.211916	0.214137	0.21309
3	NAB1_MOUSE|Q61122_S401	0.201878	0.211166	0.209086	0.216021	0.215937	0.216094	0.215281	0.212939	0.219349	0.213233	0.219095	0.203136	0.207942	0.206412	0.217553	0.2113	0.211418	0.212768	0.217659	0.220293	0.213615	0.216984	0.214557	0.211234	0.20621	0.212703	0.210876	0.211412	0.21467	0.212563	0.213624	0.214146	0.217249	0.21565	0.211852	0.213239	0.214611	0.213091	0.211465	0.212898	0.21425	0.214127	0.214042	0.215699
3	NAV1_MOUSE|Q8CH77_T543	0.205014	0.212979	0.209084	0.215191	0.216154	0.217879	0.21108	0.219352	0.21182	0.214171	0.216689	0.202307	0.208575	0.205801	0.216682	0.219796	0.214436	0.215008	0.21755	0.211971	0.211759	0.216034	0.21493	0.215711	0.217607	0.213614	0.214519	0.213364	0.211679	0.213266	0.211643	0.211058	0.210284	0.214416	0.213041	0.216138	0.21246	0.21058	0.213452	0.213865	0.212418	0.211954	0.212096	0.212153
3	NBEL2_MOUSE|Q6ZQA0_S2727	0.197613	0.214117	0.210466	0.214804	0.219365	0.213086	0.214852	0.211836	0.216407	0.210294	0.211773	0.201647	0.203043	0.214237	0.216907	0.222316	0.213594	0.217571	0.217793	0.218914	0.213721	0.214357	0.211761	0.215175	0.214907	0.211176	0.212516	0.209439	0.212573	0.21086	0.211695	0.211806	0.211938	0.21564	0.215156	0.21508	0.213773	0.214894	0.213162	0.213015	0.213753	0.21404	0.213812	0.214109
3	NBN_MOUSE|Q9R207_S398	0.212189	0.210558	0.213183	0.216535	0.218534	0.21858	0.219053	0.210644	0.2084	0.213217	0.211831	0.213255	0.210422	0.211381	0.215055	0.219192	0.215764	0.216441	0.21075	0.208512	0.207427	0.208813	0.214752	0.21272	0.218392	0.214138	0.213812	0.214708	0.215564	0.21489	0.214806	0.215405	0.216183	0.212622	0.212765	0.212337	0.211977	0.210927	0.21058	0.211651	0.210598	0.210983	0.210206	0.210153
3	NCBP1_MOUSE|Q3UYV9_T21	0.205065	0.212421	0.204527	0.21547	0.219398	0.219187	0.213891	0.209615	0.205675	0.211089	0.20865	0.208996	0.209952	0.207027	0.219805	0.225924	0.220299	0.218379	0.213762	0.213478	0.212496	0.213748	0.215265	0.216777	0.219656	0.211856	0.214163	0.211085	0.212645	0.213572	0.210274	0.214105	0.211898	0.213107	0.212632	0.212511	0.212822	0.213649	0.212424	0.212048	0.21187	0.212389	0.21277	0.212704
3	NCOA3_MOUSE|O09000_S847	0.208877	0.209285	0.212784	0.216725	0.216549	0.21489	0.215069	0.210658	0.213729	0.209645	0.210332	0.208033	0.209307	0.217982	0.215182	0.217496	0.217412	0.216297	0.212428	0.214233	0.210446	0.212553	0.217628	0.211667	0.217696	0.21591	0.213959	0.212738	0.21316	0.211805	0.211084	0.209729	0.209565	0.2137	0.213304	0.216748	0.213876	0.212918	0.21601	0.214968	0.209433	0.209234	0.212919	0.212042
3	NCOA5_MOUSE|Q91W39_S377	0.21025	0.212385	0.210355	0.21669	0.218169	0.213784	0.212933	0.212528	0.21407	0.212214	0.2109	0.209355	0.211926	0.212672	0.21446	0.215425	0.217295	0.216265	0.210994	0.211986	0.213684	0.211793	0.214144	0.210248	0.213836	0.213568	0.212735	0.212714	0.213567	0.212386	0.215569	0.214802	0.214018	0.212918	0.211444	0.212727	0.213635	0.214555	0.213798	0.211594	0.210926	0.212087	0.215267	0.213788
3	NCOA5_MOUSE|Q91W39_S378	0.209652	0.210482	0.216104	0.216265	0.217535	0.214238	0.214871	0.212858	0.214413	0.211818	0.20961	0.209528	0.211437	0.212591	0.213748	0.215263	0.217052	0.216535	0.210884	0.21113	0.21285	0.211228	0.214144	0.210248	0.213836	0.213568	0.212735	0.212714	0.213567	0.212386	0.215569	0.214802	0.214018	0.212918	0.211444	0.212727	0.213635	0.214555	0.213798	0.211594	0.210926	0.212087	0.215267	0.213788
3	NCOA6_MOUSE|Q9JL19_S2022	0.2116	0.210602	0.213132	0.214765	0.212671	0.211319	0.214427	0.208147	0.216325	0.21052	0.212347	0.21073	0.209317	0.218228	0.218998	0.21755	0.21514	0.216605	0.210918	0.212066	0.212385	0.212196	0.213947	0.211279	0.215388	0.214465	0.214733	0.2127	0.211273	0.213647	0.213451	0.212002	0.211076	0.213234	0.212643	0.213577	0.213791	0.211965	0.215956	0.214919	0.211002	0.210901	0.214104	0.21425
3	NCOR2_MOUSE|Q9WU42_S67	0.201617	0.210914	0.205545	0.218127	0.21958	0.216508	0.217843	0.215017	0.218708	0.211194	0.214592	0.204357	0.209332	0.209119	0.214609	0.217828	0.216516	0.215595	0.213503	0.213853	0.212691	0.212227	0.212723	0.209609	0.214848	0.214208	0.214573	0.214273	0.213922	0.213518	0.215122	0.213614	0.21237	0.21225	0.21262	0.214644	0.211983	0.211383	0.215021	0.21259	0.213654	0.212013	0.213618	0.211767
3	NDRG1_MOUSE|Q62433_T328	0.212948	0.206324	0.21045	0.215127	0.222215	0.216102	0.216249	0.217187	0.22082	0.215282	0.216682	0.20785	0.212275	0.207477	0.209993	0.209173	0.21536	0.213869	0.208042	0.210036	0.210809	0.215237	0.212899	0.21074	0.212961	0.214508	0.214319	0.216343	0.213859	0.215077	0.21443	0.21643	0.212959	0.212047	0.211445	0.212683	0.215255	0.213855	0.213737	0.211768	0.209655	0.21088	0.211449	0.212958
3	NDRG1_MOUSE|Q62433_T328_S330	0.207754	0.209469	0.209265	0.217588	0.220796	0.214445	0.219427	0.212454	0.214339	0.2128	0.21006	0.208293	0.209823	0.205875	0.214629	0.212723	0.218859	0.218897	0.213123	0.213553	0.211101	0.21432	0.212899	0.21074	0.212961	0.214508	0.214319	0.216343	0.213859	0.215077	0.21443	0.21643	0.212959	0.212047	0.211445	0.212683	0.215255	0.213855	0.213737	0.211768	0.209655	0.21088	0.211449	0.212958
3	NECT2_MOUSE|P32507_T401	0.20756	0.216576	0.218871	0.21337	0.213204	0.213524	0.21431	0.210336	0.210857	0.213952	0.213023	0.209749	0.208617	0.215168	0.21594	0.218082	0.21049	0.212531	0.216558	0.215576	0.211876	0.209782	0.210102	0.215793	0.216678	0.211902	0.211729	0.212507	0.212041	0.215598	0.212991	0.212338	0.218134	0.213336	0.213892	0.213531	0.215777	0.210129	0.212695	0.213172	0.214842	0.21339	0.209497	0.210089
3	NEK9_MOUSE|Q8K1R7_S332	0.205195	0.216064	0.216173	0.215722	0.219914	0.213187	0.215205	0.2109	0.214527	0.215113	0.217538	0.20949	0.210067	0.215357	0.213313	0.214979	0.211996	0.210848	0.212649	0.215095	0.207581	0.208896	0.21405	0.213316	0.214222	0.214418	0.21395	0.213935	0.214777	0.213584	0.214012	0.213692	0.213359	0.212259	0.213331	0.213503	0.212288	0.212417	0.212642	0.211228	0.211802	0.21263	0.212317	0.212642
3	NELFA_MOUSE|Q8BG30_S225	0.211391	0.210695	0.205503	0.216127	0.216076	0.217803	0.212992	0.214837	0.216057	0.20939	0.212653	0.209393	0.211942	0.211145	0.213982	0.213083	0.21921	0.215349	0.21251	0.212799	0.214452	0.212567	0.213633	0.214639	0.215658	0.215254	0.214709	0.212766	0.212277	0.213515	0.21206	0.212623	0.210975	0.211304	0.214669	0.215088	0.212228	0.212553	0.212805	0.21325	0.213054	0.211692	0.212683	0.212897
3	NELFE_MOUSE|P19426_S115	0.203074	0.21315	0.209226	0.215863	0.218544	0.214915	0.212495	0.213713	0.218056	0.2119	0.211498	0.202294	0.205736	0.214334	0.216004	0.217184	0.21667	0.216019	0.21496	0.217533	0.213787	0.212457	0.213204	0.21352	0.216931	0.21342	0.214636	0.214068	0.214303	0.214197	0.21286	0.214255	0.214317	0.213118	0.213294	0.211353	0.211307	0.212066	0.212199	0.211496	0.21266	0.212582	0.211462	0.213078
3	NEP1_MOUSE|O35130_S16	0.203864	0.212283	0.209671	0.218045	0.218296	0.217304	0.217069	0.214112	0.213347	0.215653	0.214647	0.202934	0.206986	0.207966	0.216618	0.217913	0.215297	0.213582	0.21738	0.21387	0.211128	0.211451	0.214778	0.216218	0.210528	0.214723	0.216862	0.215776	0.214629	0.214528	0.210792	0.214911	0.215157	0.209741	0.210417	0.211351	0.213457	0.209187	0.211586	0.209599	0.214455	0.216068	0.213478	0.211885
3	NEST_MOUSE|Q6P5H2_S1837	0.209249	0.203083	0.211206	0.221484	0.217553	0.218153	0.220107	0.218471	0.213274	0.218497	0.219419	0.206376	0.205486	0.211027	0.214018	0.21466	0.213124	0.211089	0.210268	0.210901	0.210669	0.211086	0.218107	0.210109	0.218969	0.218669	0.210537	0.213798	0.215674	0.218272	0.209914	0.216319	0.215376	0.211802	0.210942	0.217472	0.210865	0.210443	0.210376	0.207969	0.210864	0.21048	0.211835	0.211024
3	NEST_MOUSE|Q6P5H2_S688	0.213396	0.21052	0.205656	0.219002	0.213096	0.210938	0.215408	0.219057	0.215208	0.216748	0.218399	0.203856	0.202004	0.210095	0.212663	0.212636	0.215352	0.210613	0.217678	0.214238	0.218138	0.214619	0.218107	0.210109	0.218969	0.218669	0.210537	0.213798	0.215674	0.218272	0.209914	0.216319	0.215376	0.211802	0.210942	0.217472	0.210865	0.210443	0.210376	0.207969	0.210864	0.21048	0.211835	0.211024
3	NFAC2_MOUSE|Q60591_S739	0.208015	0.206897	0.207311	0.21465	0.216545	0.213601	0.21661	0.21411	0.2186	0.215349	0.216967	0.206412	0.209486	0.210936	0.213003	0.215055	0.215257	0.212402	0.214452	0.215665	0.213897	0.214591	0.213466	0.211976	0.212583	0.213284	0.21391	0.209293	0.21176	0.211405	0.213322	0.211266	0.211867	0.214044	0.214095	0.216523	0.214094	0.214953	0.215073	0.214859	0.211814	0.211506	0.214691	0.214492
3	NFIC_MOUSE|P70255_S276	0.207001	0.211554	0.211028	0.213261	0.217787	0.210747	0.211878	0.211495	0.212985	0.209048	0.209667	0.206802	0.207791	0.212643	0.219112	0.220767	0.220515	0.220616	0.214378	0.211756	0.21553	0.213146	0.214466	0.213733	0.216563	0.214268	0.212098	0.212857	0.211072	0.210552	0.217804	0.212154	0.212397	0.214662	0.217106	0.211455	0.212533	0.209982	0.213113	0.212711	0.209131	0.212758	0.214527	0.214234
3	NHRF1_MOUSE|P70441_S283	0.212305	0.203182	0.211844	0.214736	0.216989	0.216071	0.215857	0.209087	0.213699	0.208821	0.209067	0.211325	0.212461	0.218144	0.217379	0.216224	0.220859	0.21599	0.209258	0.211667	0.213107	0.211569	0.213548	0.20188	0.213028	0.213998	0.213921	0.214347	0.212338	0.213832	0.214063	0.213086	0.212224	0.212816	0.212669	0.216801	0.212447	0.21422	0.217697	0.212716	0.211222	0.212074	0.216502	0.214547
3	NHSL2_MOUSE|B1AXH1_S132	0.206277	0.212144	0.214918	0.21581	0.214175	0.212987	0.214209	0.212219	0.21366	0.212034	0.213253	0.204814	0.212451	0.215637	0.214756	0.215971	0.2137	0.211904	0.217146	0.216485	0.21269	0.212755	0.211412	0.211826	0.215779	0.213028	0.213785	0.211253	0.211827	0.210373	0.21451	0.210265	0.209958	0.215471	0.209832	0.219552	0.213396	0.213772	0.215572	0.213707	0.211426	0.215091	0.214244	0.21406
3	NIBAN_MOUSE|Q3UW53_S755	0.214168	0.208898	0.208674	0.213077	0.214985	0.214037	0.214586	0.213736	0.211228	0.213805	0.214941	0.212308	0.206655	0.207099	0.214945	0.215348	0.216379	0.214592	0.215702	0.211829	0.216741	0.21625	0.212493	0.211721	0.216623	0.212934	0.21392	0.213311	0.214658	0.212157	0.213411	0.213868	0.214554	0.214012	0.213262	0.212901	0.213033	0.211807	0.211513	0.21378	0.214036	0.212425	0.211395	0.212528
3	NIBAN_MOUSE|Q3UW53_S787	0.210535	0.209489	0.202378	0.208441	0.214085	0.214405	0.211933	0.206632	0.206929	0.207522	0.212401	0.214647	0.216302	0.211334	0.219251	0.221838	0.221521	0.216624	0.217846	0.215027	0.211479	0.218523	0.212493	0.211721	0.216623	0.212934	0.21392	0.213311	0.214658	0.212157	0.213411	0.213868	0.214554	0.214012	0.213262	0.212901	0.213033	0.211807	0.211513	0.21378	0.214036	0.212425	0.211395	0.212528
3	NIN_MOUSE|Q61043_S269	0.209974	0.217115	0.207578	0.214146	0.216928	0.212703	0.212499	0.211316	0.216527	0.210398	0.21048	0.211371	0.208305	0.219468	0.211384	0.219079	0.214001	0.214902	0.212757	0.213534	0.211977	0.213473	0.215762	0.211092	0.218604	0.214321	0.213198	0.213541	0.215242	0.212817	0.213221	0.213619	0.214516	0.215075	0.211452	0.2147	0.212915	0.212353	0.210606	0.212792	0.211354	0.20906	0.211349	0.21262
3	NIPA_MOUSE|Q80YV2_S343	0.211171	0.212401	0.211923	0.215047	0.215345	0.214475	0.214236	0.215528	0.215175	0.214986	0.213952	0.208516	0.20842	0.214178	0.214318	0.213974	0.213398	0.211208	0.213603	0.212261	0.213494	0.212611	0.213906	0.210618	0.217958	0.214446	0.214121	0.214545	0.21526	0.214567	0.214312	0.214779	0.214323	0.21192	0.21287	0.212408	0.211658	0.209716	0.212366	0.211527	0.212931	0.212133	0.211096	0.212789
3	NKTR_MOUSE|P30415_S1195	0.211185	0.209188	0.214917	0.2128	0.212806	0.213248	0.214889	0.213305	0.213147	0.215425	0.214645	0.212184	0.211054	0.212216	0.213705	0.215127	0.213719	0.212376	0.213271	0.214637	0.212813	0.213647	0.212639	0.21113	0.218954	0.213204	0.212924	0.2115	0.213658	0.211874	0.212596	0.212115	0.214364	0.21548	0.213035	0.214791	0.212618	0.214637	0.213232	0.213537	0.211883	0.211283	0.211264	0.213546
3	NOL4L_MOUSE|Q6DIB4_S458	0.212112	0.212558	0.213028	0.214461	0.214421	0.214926	0.214473	0.215194	0.214012	0.217577	0.21462	0.208465	0.208712	0.212114	0.21335	0.213825	0.20971	0.211641	0.21489	0.213494	0.213845	0.21276	0.219677	0.212537	0.217085	0.21111	0.216109	0.213797	0.212648	0.211402	0.211721	0.21486	0.214699	0.217786	0.207865	0.212438	0.206079	0.209474	0.209346	0.214073	0.213798	0.21532	0.212886	0.21519
3	NOP56_MOUSE|Q9D6Z1_S543	0.212626	0.209126	0.218417	0.207913	0.21455	0.214703	0.212055	0.211946	0.213017	0.213794	0.211845	0.210466	0.208107	0.202967	0.214448	0.213533	0.217154	0.217017	0.217447	0.215649	0.217556	0.215378	0.212995	0.218257	0.216762	0.212285	0.212255	0.214264	0.210516	0.213108	0.211221	0.211371	0.209735	0.21293	0.21456	0.210071	0.21294	0.214189	0.214504	0.214847	0.214424	0.213099	0.21354	0.21234
3	NRBP_MOUSE|Q99J45_T431	0.206228	0.212496	0.208169	0.211114	0.209611	0.208872	0.211242	0.213984	0.213237	0.212459	0.214098	0.209912	0.211317	0.218267	0.216305	0.218905	0.214088	0.214686	0.216899	0.218972	0.214881	0.21408	0.212709	0.215665	0.226072	0.211835	0.211517	0.209042	0.210285	0.212014	0.211789	0.206258	0.214484	0.212303	0.211569	0.215926	0.21514	0.214828	0.21615	0.21056	0.211212	0.212693	0.214661	0.213011
3	NSD1_MOUSE|O88491_S844	0.21026	0.213419	0.209281	0.210237	0.211985	0.218755	0.212489	0.215579	0.208482	0.214181	0.211948	0.21113	0.210544	0.205305	0.218166	0.219703	0.219573	0.214898	0.216347	0.213054	0.2142	0.210175	0.216106	0.218364	0.218448	0.212746	0.212787	0.213974	0.212011	0.214664	0.212635	0.209915	0.207551	0.212649	0.215464	0.21091	0.210997	0.210974	0.215907	0.213841	0.212228	0.2123	0.213377	0.212236
3	NSUN2_MOUSE|Q1HFZ0_S23	0.21413	0.207223	0.210116	0.214735	0.215753	0.218011	0.216163	0.210768	0.210487	0.212528	0.213564	0.214722	0.212657	0.212191	0.214642	0.217154	0.216504	0.211786	0.209898	0.211355	0.213565	0.212111	0.213849	0.211317	0.20975	0.214733	0.212857	0.215113	0.213993	0.213618	0.211175	0.215044	0.212931	0.214119	0.212201	0.214216	0.214197	0.214017	0.212935	0.212733	0.212464	0.21316	0.212556	0.21335
3	NU155_MOUSE|Q99P88_S994	0.212425	0.210131	0.2063	0.216056	0.215592	0.20849	0.209564	0.212965	0.213424	0.207826	0.206825	0.211957	0.208654	0.219383	0.214684	0.215152	0.220046	0.221701	0.212994	0.212026	0.217329	0.21598	0.214255	0.217567	0.212718	0.215033	0.214619	0.214984	0.214011	0.213836	0.213652	0.214715	0.213938	0.213719	0.212393	0.212568	0.212418	0.211457	0.2102	0.211299	0.212324	0.211269	0.211719	0.211581
3	NU188_MOUSE|Q6ZQH8_S1719	0.209082	0.214467	0.208752	0.215709	0.216567	0.214789	0.21263	0.214156	0.212954	0.212475	0.211221	0.207191	0.209502	0.20769	0.215781	0.216638	0.216274	0.217973	0.21408	0.21369	0.213958	0.214371	0.212947	0.218429	0.214023	0.214156	0.21263	0.21346	0.212511	0.214537	0.21007	0.213469	0.212578	0.213193	0.213199	0.210368	0.214103	0.213529	0.213129	0.211832	0.212941	0.21343	0.213476	0.212282
3	NU188_MOUSE|Q6ZQH8_T1515	0.210468	0.213625	0.215436	0.213141	0.215535	0.214897	0.214147	0.214047	0.214416	0.21511	0.213124	0.208353	0.208124	0.20903	0.212074	0.213749	0.214074	0.211771	0.216308	0.215204	0.214093	0.213425	0.212947	0.218429	0.214023	0.214156	0.21263	0.21346	0.212511	0.214537	0.21007	0.213469	0.212578	0.213193	0.213199	0.210368	0.214103	0.213529	0.213129	0.211832	0.212941	0.21343	0.213476	0.212282
3	NUDC_MOUSE|O35685_T99	0.210395	0.211153	0.211741	0.213185	0.210981	0.215601	0.214222	0.220164	0.213413	0.221763	0.220914	0.208988	0.20719	0.211181	0.213988	0.214767	0.209697	0.207501	0.217426	0.212038	0.212532	0.210783	0.212998	0.211404	0.216705	0.214445	0.213606	0.215256	0.215482	0.213922	0.212378	0.214879	0.21551	0.213241	0.210797	0.21302	0.213863	0.213777	0.210222	0.211906	0.21233	0.210822	0.211739	0.211964
3	NUFP2_MOUSE|Q5F2E7_S114	0.214604	0.198638	0.20513	0.213144	0.214073	0.219489	0.219554	0.212714	0.21285	0.213787	0.214525	0.214608	0.214261	0.200363	0.214871	0.21234	0.222138	0.220407	0.213326	0.2122	0.213282	0.212547	0.212691	0.209541	0.215176	0.213401	0.211176	0.212368	0.212485	0.213714	0.210527	0.214038	0.211973	0.214433	0.211761	0.212903	0.214172	0.214386	0.214847	0.2148	0.214093	0.213091	0.214696	0.214034
3	NUMA1_MOUSE|E9Q7G0_S1844	0.211903	0.212848	0.206166	0.209239	0.216283	0.216593	0.212996	0.216539	0.212987	0.215211	0.213377	0.206906	0.205904	0.205686	0.213583	0.222957	0.216832	0.216675	0.218795	0.209462	0.217542	0.210893	0.214882	0.214168	0.215112	0.21347	0.215547	0.215172	0.212401	0.215185	0.21516	0.213983	0.212091	0.212362	0.212323	0.2117	0.211789	0.210817	0.212137	0.212901	0.210368	0.211852	0.213391	0.213489
3	NUMA1_MOUSE|E9Q7G0_S398	0.208798	0.207948	0.205616	0.217572	0.221579	0.217027	0.215143	0.215978	0.218296	0.21338	0.212053	0.204004	0.206472	0.209867	0.213403	0.214845	0.218447	0.216436	0.212322	0.211858	0.214136	0.214218	0.214882	0.214168	0.215112	0.21347	0.215547	0.215172	0.212401	0.215185	0.21516	0.213983	0.212091	0.212362	0.212323	0.2117	0.211789	0.210817	0.212137	0.212901	0.210368	0.211852	0.213391	0.213489
3	NUMA1_MOUSE|E9Q7G0_T1976_T1982	0.203078	0.211345	0.210211	0.21929	0.221475	0.214326	0.214695	0.220907	0.222054	0.212446	0.214725	0.202494	0.210906	0.209504	0.213119	0.214692	0.216013	0.21556	0.205601	0.211265	0.213032	0.212328	0.214882	0.214168	0.215112	0.21347	0.215547	0.215172	0.212401	0.215185	0.21516	0.213983	0.212091	0.212362	0.212323	0.2117	0.211789	0.210817	0.212137	0.212901	0.210368	0.211852	0.213391	0.213489
3	NUMB_MOUSE|Q9QZS3_S253	0.20871	0.213901	0.212789	0.217935	0.218961	0.220275	0.218474	0.214955	0.214563	0.210122	0.214768	0.208342	0.215244	0.202592	0.211861	0.212986	0.211195	0.216413	0.211558	0.210911	0.209763	0.213282	0.2147	0.212686	0.212498	0.213981	0.213293	0.211839	0.213331	0.212939	0.211418	0.21145	0.212598	0.214908	0.214148	0.21338	0.212156	0.21606	0.214526	0.214383	0.210966	0.211419	0.212726	0.214918
3	NUMB_MOUSE|Q9QZS3_S636	0.213234	0.206143	0.2071	0.212827	0.212606	0.214908	0.21325	0.215358	0.209478	0.215312	0.221809	0.206656	0.207066	0.207899	0.215925	0.220896	0.218968	0.213676	0.21769	0.212967	0.213353	0.212317	0.2147	0.212686	0.212498	0.213981	0.213293	0.211839	0.213331	0.212939	0.211418	0.21145	0.212598	0.214908	0.214148	0.21338	0.212156	0.21606	0.214526	0.214383	0.210966	0.211419	0.212726	0.214918
3	NUMB_MOUSE|Q9QZS3_T638	0.212423	0.203845	0.207849	0.211847	0.211061	0.215035	0.213484	0.215492	0.210528	0.215494	0.223149	0.206826	0.208675	0.207651	0.216933	0.220388	0.218102	0.213233	0.217105	0.213824	0.212141	0.214294	0.2147	0.212686	0.212498	0.213981	0.213293	0.211839	0.213331	0.212939	0.211418	0.21145	0.212598	0.214908	0.214148	0.21338	0.212156	0.21606	0.214526	0.214383	0.210966	0.211419	0.212726	0.214918
3	NUP53_MOUSE|Q8R4R6_T272	0.211711	0.210671	0.211427	0.215403	0.214475	0.213866	0.213017	0.213772	0.212872	0.214786	0.213772	0.21059	0.210569	0.212356	0.214212	0.214872	0.217358	0.214494	0.214165	0.212061	0.212328	0.211485	0.217489	0.213193	0.220002	0.213911	0.207567	0.208966	0.212414	0.211509	0.209407	0.211859	0.209026	0.211759	0.213259	0.216159	0.216055	0.213126	0.215899	0.214233	0.215667	0.211868	0.213964	0.212644
3	NUP53_MOUSE|Q8R4R6_T279	0.207982	0.212544	0.211942	0.217875	0.217834	0.215686	0.215098	0.215076	0.212151	0.214438	0.212359	0.208756	0.207635	0.212851	0.214048	0.217124	0.213494	0.214063	0.212142	0.212244	0.213018	0.211678	0.217489	0.213193	0.220002	0.213911	0.207567	0.208966	0.212414	0.211509	0.209407	0.211859	0.209026	0.211759	0.213259	0.216159	0.216055	0.213126	0.215899	0.214233	0.215667	0.211868	0.213964	0.212644
3	NUP93_MOUSE|Q8BJ71_S52	0.211004	0.214653	0.209408	0.214685	0.213491	0.209685	0.212229	0.216871	0.211565	0.213624	0.213627	0.206355	0.202537	0.208279	0.215789	0.218396	0.21601	0.217147	0.212834	0.217843	0.217433	0.216144	0.213977	0.217606	0.215034	0.21478	0.214243	0.213317	0.21343	0.214844	0.213497	0.213763	0.214074	0.212771	0.212416	0.213357	0.211958	0.21149	0.210781	0.211922	0.212319	0.211542	0.211456	0.211715
3	NUP98_MOUSE|Q6PFD9_S1059	0.213131	0.2112	0.207388	0.212867	0.211438	0.215374	0.214766	0.211757	0.206525	0.210937	0.212733	0.214286	0.214131	0.212599	0.216631	0.219549	0.214421	0.213974	0.216081	0.211985	0.214841	0.213403	0.213969	0.212483	0.212064	0.215093	0.214272	0.214372	0.213768	0.214416	0.213652	0.214997	0.214834	0.212722	0.212068	0.212492	0.212965	0.212077	0.212194	0.211599	0.212494	0.21145	0.212959	0.213412
3	NUP98_MOUSE|Q6PFD9_S1061	0.214754	0.21394	0.207059	0.213706	0.211697	0.215671	0.212691	0.212188	0.206444	0.214188	0.212349	0.213199	0.213139	0.211926	0.217397	0.218702	0.212743	0.213314	0.2154	0.211437	0.214743	0.21336	0.213969	0.212483	0.212064	0.215093	0.214272	0.214372	0.213768	0.214416	0.213652	0.214997	0.214834	0.212722	0.212068	0.212492	0.212965	0.212077	0.212194	0.211599	0.212494	0.21145	0.212959	0.213412
3	NUP98_MOUSE|Q6PFD9_T545	0.206123	0.212626	0.210958	0.216989	0.217302	0.216331	0.214243	0.216873	0.214365	0.21914	0.217233	0.205125	0.204424	0.208548	0.212991	0.217698	0.213473	0.209663	0.216085	0.213532	0.213855	0.21197	0.213969	0.212483	0.212064	0.215093	0.214272	0.214372	0.213768	0.214416	0.213652	0.214997	0.214834	0.212722	0.212068	0.212492	0.212965	0.212077	0.212194	0.211599	0.212494	0.21145	0.212959	0.213412
3	NXP20_MOUSE|Q9D281_T197	0.205077	0.211485	0.203881	0.213925	0.215274	0.209992	0.213402	0.212093	0.211944	0.210459	0.211613	0.210826	0.209369	0.217892	0.219185	0.220013	0.219411	0.215487	0.214163	0.215658	0.214297	0.214124	0.213038	0.212652	0.209774	0.211834	0.213709	0.211356	0.212749	0.211795	0.214424	0.213686	0.212329	0.213522	0.211218	0.218174	0.213815	0.214845	0.213408	0.213431	0.213001	0.214648	0.210941	0.215906
3	ODPA_MOUSE|P35486_S232	0.205414	0.216499	0.215298	0.212978	0.217282	0.212436	0.215125	0.210091	0.214548	0.213134	0.209163	0.211752	0.216572	0.21735	0.217572	0.219675	0.212971	0.214234	0.206683	0.212931	0.208383	0.209631	0.212902	0.212783	0.215049	0.213526	0.212266	0.213049	0.213487	0.213213	0.212331	0.21333	0.212773	0.213381	0.211909	0.213034	0.214179	0.21364	0.211487	0.215657	0.212866	0.213404	0.21239	0.213717
3	OPHN1_MOUSE|Q99J31_S652	0.212225	0.21227	0.208372	0.212864	0.215043	0.218031	0.212499	0.209068	0.214697	0.211765	0.213571	0.213817	0.215432	0.212326	0.211883	0.217096	0.212471	0.214226	0.211552	0.214918	0.216104	0.209898	0.212722	0.21157	0.218527	0.21198	0.214349	0.213736	0.213822	0.213179	0.214818	0.21339	0.213644	0.211309	0.21438	0.211835	0.21253	0.213401	0.213565	0.212316	0.211815	0.212595	0.212523	0.212296
3	OPTN_MOUSE|Q8K3K8_T210	0.212534	0.200823	0.201369	0.215868	0.212929	0.218188	0.213637	0.218926	0.208207	0.218977	0.213178	0.208084	0.207944	0.216398	0.214698	0.219834	0.213842	0.212025	0.214662	0.214161	0.215449	0.217385	0.215048	0.204335	0.216345	0.21414	0.213545	0.217993	0.21428	0.214012	0.215528	0.218843	0.215331	0.211788	0.211116	0.215848	0.210484	0.211474	0.210745	0.207878	0.212319	0.212882	0.213334	0.212633
3	OSB11_MOUSE|Q8CI95_S179	0.211731	0.208111	0.206076	0.211549	0.215423	0.21692	0.21783	0.214567	0.214602	0.215783	0.218395	0.211126	0.211879	0.212816	0.211421	0.214595	0.211978	0.213917	0.215194	0.215775	0.207932	0.2123	0.215029	0.215048	0.214822	0.213564	0.217091	0.214317	0.214371	0.212755	0.214687	0.213501	0.213566	0.212294	0.213912	0.212597	0.211665	0.212656	0.21126	0.212614	0.209845	0.211188	0.211259	0.21224
3	OSB11_MOUSE|Q8CI95_S182	0.211898	0.214255	0.210914	0.215281	0.217399	0.215284	0.216437	0.211387	0.21753	0.212231	0.214037	0.20827	0.212404	0.212908	0.211122	0.215107	0.214332	0.214715	0.213215	0.212182	0.208444	0.210747	0.215029	0.215048	0.214822	0.213564	0.217091	0.214317	0.214371	0.212755	0.214687	0.213501	0.213566	0.212294	0.213912	0.212597	0.211665	0.212656	0.21126	0.212614	0.209845	0.211188	0.211259	0.21224
3	OSBL3_MOUSE|Q9DBS9_S21	0.212135	0.214984	0.207987	0.213731	0.210646	0.216212	0.214512	0.214951	0.210145	0.214728	0.213927	0.215891	0.206162	0.21479	0.212198	0.224995	0.213519	0.212001	0.206474	0.216578	0.209891	0.21318	0.215114	0.219136	0.218219	0.216439	0.216851	0.216117	0.214726	0.213455	0.217362	0.213612	0.215017	0.211739	0.210604	0.212472	0.21095	0.207679	0.209165	0.210782	0.210196	0.210748	0.209856	0.209649
3	OTUD4_MOUSE|B2RRE7_S1000	0.208357	0.211145	0.211791	0.21743	0.21923	0.214836	0.215428	0.215906	0.215526	0.214538	0.213054	0.203841	0.202312	0.210237	0.215291	0.217477	0.214587	0.215746	0.212702	0.211979	0.214987	0.213179	0.213799	0.212672	0.216843	0.215365	0.21469	0.213755	0.213859	0.214038	0.212711	0.212064	0.212401	0.213868	0.211476	0.213572	0.212107	0.21143	0.213483	0.213862	0.21186	0.211133	0.213088	0.212247
3	OXR1_MOUSE|Q4KMM3_S201	0.206819	0.210765	0.214587	0.211318	0.217204	0.212916	0.215393	0.210337	0.210021	0.214728	0.217441	0.212647	0.210737	0.213811	0.215167	0.219787	0.212215	0.211132	0.213401	0.215635	0.211927	0.212007	0.213969	0.21068	0.218801	0.213931	0.216557	0.21608	0.215736	0.213856	0.215538	0.21623	0.214636	0.213646	0.212436	0.213539	0.21105	0.210827	0.211364	0.211676	0.209551	0.21049	0.208311	0.211165
3	P4K2A_MOUSE|Q2TBE6_S462	0.206469	0.211377	0.210635	0.211797	0.21571	0.214173	0.213371	0.212119	0.21162	0.211013	0.212786	0.211094	0.213306	0.209909	0.21551	0.215327	0.215431	0.215244	0.216516	0.216912	0.215791	0.213979	0.211123	0.217424	0.21597	0.21142	0.213978	0.212446	0.211831	0.212094	0.212129	0.213046	0.212027	0.213119	0.212755	0.209438	0.212577	0.214221	0.213838	0.214517	0.214904	0.215204	0.212921	0.213283
3	P4R3A_MOUSE|Q6P2K6_S728	0.211035	0.2095	0.214105	0.217219	0.219412	0.216162	0.216355	0.218091	0.216424	0.218263	0.215616	0.207243	0.208779	0.210299	0.212126	0.211481	0.211773	0.212433	0.210518	0.209921	0.210915	0.212155	0.212649	0.215541	0.21644	0.214902	0.215294	0.21266	0.214344	0.213944	0.213522	0.213324	0.215126	0.212983	0.210731	0.213276	0.21197	0.213137	0.211647	0.212943	0.211658	0.211502	0.210751	0.211949
3	P66A_MOUSE|Q8CHY6_T185	0.211508	0.203029	0.214149	0.216468	0.220916	0.22242	0.220535	0.211015	0.21162	0.213996	0.212622	0.209613	0.209321	0.206706	0.21611	0.219954	0.21974	0.218698	0.208577	0.206924	0.205562	0.209398	0.21377	0.211612	0.217028	0.212419	0.213526	0.214008	0.21317	0.213038	0.212898	0.214008	0.212609	0.214109	0.212046	0.212631	0.213868	0.212779	0.212372	0.213651	0.211259	0.212971	0.213161	0.213417
3	P66B_MOUSE|Q8VHR5_S487	0.209941	0.208978	0.210374	0.213402	0.215913	0.217661	0.215366	0.21547	0.21335	0.216201	0.215685	0.208758	0.212042	0.208646	0.212969	0.217199	0.216107	0.216029	0.214589	0.212178	0.208195	0.2109	0.213564	0.208709	0.214511	0.214708	0.21595	0.21414	0.213339	0.214304	0.213908	0.214534	0.213433	0.21228	0.21126	0.213466	0.21349	0.212071	0.213765	0.215134	0.210826	0.211152	0.21162	0.214113
3	PALLD_MOUSE|Q9ET54_S901	0.209153	0.209291	0.210832	0.218867	0.219578	0.218164	0.219023	0.217773	0.216887	0.215514	0.2164	0.2023	0.209392	0.207739	0.212036	0.21504	0.213403	0.213856	0.210158	0.212815	0.208808	0.212409	0.214999	0.215	0.215354	0.218035	0.216658	0.217468	0.215643	0.217339	0.216197	0.215954	0.214873	0.208828	0.211024	0.207911	0.208618	0.210837	0.21031	0.211544	0.209518	0.210726	0.210383	0.21267
3	PAN3_MOUSE|Q640Q5_S300	0.212078	0.21202	0.213867	0.216839	0.217223	0.215031	0.215253	0.210495	0.212529	0.214799	0.214607	0.209745	0.210884	0.211123	0.213417	0.215295	0.212767	0.214579	0.211755	0.213351	0.211288	0.211261	0.212763	0.211587	0.214985	0.214381	0.214893	0.215024	0.215081	0.21384	0.214142	0.214719	0.214253	0.21052	0.211614	0.211673	0.210076	0.212967	0.21298	0.212702	0.214834	0.213432	0.21109	0.212738
3	PAR12_MOUSE|Q8BZ20_S253	0.211913	0.213577	0.208334	0.215022	0.216179	0.213824	0.211883	0.213955	0.215252	0.210045	0.213038	0.205711	0.21146	0.213796	0.214114	0.215004	0.216858	0.21528	0.214104	0.213895	0.213807	0.213042	0.211939	0.213897	0.211709	0.211877	0.211205	0.209826	0.212506	0.211687	0.214488	0.212392	0.214012	0.213493	0.215148	0.214291	0.214611	0.213002	0.214511	0.211873	0.214759	0.214667	0.21435	0.214069
3	PAXI_MOUSE|Q8VI36_S83	0.21043	0.209141	0.213971	0.210463	0.217039	0.214255	0.214839	0.210755	0.213612	0.212853	0.213707	0.211191	0.212904	0.213028	0.213243	0.217348	0.214217	0.212097	0.213326	0.214267	0.213744	0.213792	0.213048	0.206721	0.214394	0.213654	0.214123	0.212473	0.212747	0.212389	0.214613	0.212697	0.212413	0.212139	0.212533	0.21637	0.213727	0.213077	0.214987	0.212713	0.212715	0.212174	0.215288	0.215247
3	PCBP1_MOUSE|P60335_S262	0.207024	0.21046	0.205631	0.212303	0.21247	0.212164	0.211281	0.213952	0.212123	0.216341	0.216887	0.214507	0.213114	0.20474	0.215974	0.214625	0.21399	0.212387	0.217884	0.214606	0.215946	0.221268	0.213484	0.211434	0.212703	0.213578	0.213025	0.214767	0.212828	0.213725	0.212067	0.214929	0.2134	0.21442	0.213949	0.213537	0.212727	0.2143	0.212933	0.211989	0.2114	0.21313	0.21238	0.213662
3	PCBP1_MOUSE|P60335_S264	0.207259	0.208828	0.203464	0.212341	0.212888	0.212385	0.211928	0.215903	0.215878	0.216375	0.216943	0.212211	0.214605	0.208477	0.213675	0.214175	0.213282	0.212359	0.216065	0.215458	0.216517	0.218758	0.213484	0.211434	0.212703	0.213578	0.213025	0.214767	0.212828	0.213725	0.212067	0.214929	0.2134	0.21442	0.213949	0.213537	0.212727	0.2143	0.212933	0.211989	0.2114	0.21313	0.21238	0.213662
3	PCBP2_MOUSE|Q61990_S268	0.207689	0.208292	0.199674	0.211451	0.218116	0.214021	0.213029	0.216234	0.217266	0.218639	0.219974	0.213826	0.213387	0.202615	0.211693	0.213057	0.212577	0.213499	0.213348	0.215361	0.214946	0.220451	0.21284	0.211912	0.21096	0.214527	0.213286	0.212114	0.213236	0.214521	0.209742	0.214738	0.214129	0.213998	0.213439	0.215752	0.214285	0.21486	0.211542	0.211685	0.211986	0.212901	0.212122	0.215717
3	PCBP2_MOUSE|Q61990_S362	0.207423	0.207852	0.221639	0.215533	0.21493	0.212078	0.213489	0.211797	0.213872	0.20934	0.210116	0.209418	0.2089	0.219422	0.212382	0.217486	0.213472	0.221503	0.214031	0.212664	0.209514	0.212748	0.21284	0.211912	0.21096	0.214527	0.213286	0.212114	0.213236	0.214521	0.209742	0.214738	0.214129	0.213998	0.213439	0.215752	0.214285	0.21486	0.211542	0.211685	0.211986	0.212901	0.212122	0.215717
3	PCM1_MOUSE|Q9R0L6_S65	0.208465	0.20641	0.208797	0.213246	0.212314	0.214107	0.214608	0.215211	0.215531	0.21583	0.216289	0.208873	0.210703	0.212015	0.214587	0.214331	0.213352	0.213764	0.216531	0.216168	0.214693	0.21419	0.21184	0.207632	0.214188	0.212979	0.211357	0.212982	0.212585	0.212726	0.211563	0.213445	0.213444	0.213593	0.212372	0.214984	0.215365	0.214551	0.213882	0.213744	0.214188	0.213699	0.214751	0.214412
3	PCNT_MOUSE|P48725_S1437	0.212389	0.208959	0.209281	0.214228	0.213926	0.213565	0.213759	0.213185	0.213895	0.214346	0.213684	0.210671	0.209511	0.213354	0.214734	0.21363	0.215624	0.211648	0.214537	0.21452	0.216129	0.214647	0.213804	0.210813	0.214483	0.213735	0.21282	0.213993	0.213817	0.21406	0.213318	0.213795	0.212479	0.213818	0.211564	0.213851	0.213267	0.212775	0.213358	0.211214	0.211762	0.212797	0.214316	0.214522
3	PCX3_MOUSE|Q8VI59_S246	0.208524	0.216064	0.210323	0.212687	0.214801	0.215623	0.214644	0.210399	0.211798	0.212005	0.211924	0.212614	0.208569	0.21127	0.215474	0.217565	0.214171	0.214677	0.214365	0.217377	0.21293	0.212296	0.215034	0.221186	0.219244	0.208115	0.211992	0.213375	0.20985	0.209466	0.216171	0.212763	0.210351	0.213012	0.216557	0.207098	0.21731	0.211029	0.213665	0.214374	0.214572	0.210305	0.212582	0.211761
3	PDE8A_MOUSE|O88502_S452	0.211744	0.212311	0.207723	0.212484	0.213917	0.212242	0.215613	0.213908	0.214099	0.21452	0.213509	0.211565	0.21645	0.210531	0.212838	0.212551	0.213533	0.214477	0.21642	0.213505	0.21393	0.212365	0.210092	0.215088	0.218151	0.212433	0.215038	0.213049	0.212317	0.212254	0.214057	0.211516	0.212122	0.21194	0.214419	0.213142	0.212982	0.211315	0.212108	0.212767	0.215478	0.213262	0.212544	0.214196
3	PDLI2_MOUSE|Q8R1G6_S87	0.205994	0.208883	0.210802	0.213214	0.216462	0.210194	0.212721	0.21428	0.217274	0.214648	0.216748	0.206466	0.208652	0.210532	0.21321	0.212585	0.212622	0.211353	0.218972	0.216656	0.21805	0.219364	0.210758	0.207678	0.213273	0.213045	0.213497	0.213918	0.213188	0.212401	0.210179	0.211518	0.212111	0.214811	0.215544	0.213978	0.213022	0.216027	0.21443	0.214624	0.213024	0.213943	0.215713	0.21355
3	PDXD1_MOUSE|Q99K01_S736	0.209088	0.210198	0.211318	0.211328	0.212904	0.213209	0.214164	0.212588	0.2124	0.214598	0.212943	0.212915	0.211912	0.21117	0.216963	0.215389	0.213122	0.213675	0.214594	0.215331	0.213964	0.216456	0.212006	0.211728	0.213276	0.214472	0.213525	0.213935	0.214034	0.21315	0.211657	0.214529	0.212457	0.21472	0.214069	0.214427	0.213309	0.213992	0.213404	0.211915	0.212246	0.212435	0.211985	0.213097
3	PEAK1_MOUSE|Q69Z38_S1050	0.202974	0.213724	0.202235	0.218453	0.214501	0.215774	0.212771	0.215055	0.216103	0.214312	0.214393	0.204478	0.204619	0.210701	0.217527	0.217267	0.215678	0.215309	0.217105	0.217712	0.215107	0.213406	0.213646	0.212215	0.21542	0.214891	0.215031	0.215094	0.214077	0.214511	0.214511	0.214696	0.213913	0.211798	0.21175	0.211898	0.212549	0.212354	0.211082	0.213884	0.211403	0.210876	0.211823	0.212886
3	PEAK1_MOUSE|Q69Z38_S1091	0.205429	0.210452	0.211771	0.215009	0.209905	0.214975	0.214805	0.217692	0.213548	0.212582	0.214886	0.206443	0.205779	0.20801	0.21527	0.215238	0.21515	0.211881	0.22281	0.214633	0.213946	0.219292	0.213646	0.212215	0.21542	0.214891	0.215031	0.215094	0.214077	0.214511	0.214511	0.214696	0.213913	0.211798	0.21175	0.211898	0.212549	0.212354	0.211082	0.213884	0.211403	0.210876	0.211823	0.212886
3	PEAK1_MOUSE|Q69Z38_S360	0.210059	0.212077	0.206022	0.212972	0.212921	0.216142	0.21294	0.212643	0.212722	0.217499	0.215602	0.213468	0.210097	0.212597	0.213442	0.215525	0.214276	0.210591	0.216431	0.216797	0.212297	0.212959	0.213646	0.212215	0.21542	0.214891	0.215031	0.215094	0.214077	0.214511	0.214511	0.214696	0.213913	0.211798	0.21175	0.211898	0.212549	0.212354	0.211082	0.213884	0.211403	0.210876	0.211823	0.212886
3	PEAK1_MOUSE|Q69Z38_S371	0.211584	0.212483	0.207035	0.216494	0.219452	0.218547	0.216119	0.215535	0.213838	0.219161	0.215656	0.205595	0.203342	0.207164	0.213812	0.217586	0.21399	0.210553	0.212308	0.213349	0.212182	0.2137	0.213646	0.212215	0.21542	0.214891	0.215031	0.215094	0.214077	0.214511	0.214511	0.214696	0.213913	0.211798	0.21175	0.211898	0.212549	0.212354	0.211082	0.213884	0.211403	0.210876	0.211823	0.212886
3	PEAK1_MOUSE|Q69Z38_S500	0.206919	0.208666	0.208719	0.215548	0.216765	0.220127	0.21635	0.213107	0.209393	0.212829	0.215137	0.211413	0.209001	0.210997	0.21647	0.219705	0.214998	0.217607	0.213826	0.212814	0.20585	0.213399	0.213646	0.212215	0.21542	0.214891	0.215031	0.215094	0.214077	0.214511	0.214511	0.214696	0.213913	0.211798	0.21175	0.211898	0.212549	0.212354	0.211082	0.213884	0.211403	0.210876	0.211823	0.212886
3	PEAK1_MOUSE|Q69Z38_S565_T571	0.208696	0.204819	0.20074	0.218511	0.218188	0.213048	0.212969	0.216766	0.215293	0.210312	0.207818	0.207294	0.21148	0.215917	0.21338	0.213101	0.219826	0.219713	0.213295	0.213971	0.217583	0.216491	0.213646	0.212215	0.21542	0.214891	0.215031	0.215094	0.214077	0.214511	0.214511	0.214696	0.213913	0.211798	0.21175	0.211898	0.212549	0.212354	0.211082	0.213884	0.211403	0.210876	0.211823	0.212886
3	PEAK1_MOUSE|Q69Z38_S569	0.204878	0.211299	0.210031	0.216225	0.216636	0.214612	0.215063	0.215985	0.216145	0.216276	0.214466	0.205866	0.205791	0.211284	0.216278	0.215163	0.214114	0.214849	0.215805	0.213993	0.212097	0.212915	0.213646	0.212215	0.21542	0.214891	0.215031	0.215094	0.214077	0.214511	0.214511	0.214696	0.213913	0.211798	0.21175	0.211898	0.212549	0.212354	0.211082	0.213884	0.211403	0.210876	0.211823	0.212886
3	PEAK1_MOUSE|Q69Z38_T501	0.209274	0.212867	0.20749	0.214135	0.216777	0.219236	0.216847	0.213275	0.210324	0.216868	0.214032	0.21081	0.209038	0.207037	0.216421	0.217364	0.213741	0.216382	0.21486	0.213397	0.208549	0.211078	0.213646	0.212215	0.21542	0.214891	0.215031	0.215094	0.214077	0.214511	0.214511	0.214696	0.213913	0.211798	0.21175	0.211898	0.212549	0.212354	0.211082	0.213884	0.211403	0.210876	0.211823	0.212886
3	PEAK1_MOUSE|Q69Z38_T568	0.206618	0.210747	0.208017	0.21633	0.216247	0.214627	0.215304	0.21545	0.215994	0.21622	0.214226	0.206185	0.206459	0.209439	0.216369	0.214915	0.214338	0.21491	0.215026	0.214535	0.214122	0.213735	0.213646	0.212215	0.21542	0.214891	0.215031	0.215094	0.214077	0.214511	0.214511	0.214696	0.213913	0.211798	0.21175	0.211898	0.212549	0.212354	0.211082	0.213884	0.211403	0.210876	0.211823	0.212886
3	PHAR4_MOUSE|Q501J7_S148	0.210311	0.208294	0.209475	0.214364	0.21792	0.216212	0.215676	0.209705	0.209682	0.209137	0.212416	0.216696	0.216274	0.213732	0.217641	0.214506	0.215287	0.214939	0.210061	0.211222	0.213735	0.212681	0.215012	0.208864	0.21716	0.215302	0.213692	0.214551	0.214198	0.210851	0.213026	0.213652	0.213825	0.21335	0.211306	0.215554	0.212198	0.212223	0.212788	0.212395	0.211486	0.213756	0.212085	0.212985
3	PI3R4_MOUSE|Q8VD65_S905	0.208844	0.210878	0.203743	0.211464	0.212754	0.214506	0.209592	0.214543	0.214763	0.216836	0.216223	0.212666	0.212222	0.206908	0.2151	0.214869	0.215366	0.211997	0.215557	0.216351	0.215362	0.219243	0.212657	0.21639	0.21357	0.212635	0.214455	0.213175	0.213805	0.212773	0.215111	0.212587	0.212715	0.213492	0.214528	0.21315	0.211455	0.213108	0.212834	0.212786	0.211939	0.213501	0.211604	0.212079
3	PI3R5_MOUSE|Q5SW28_S500	0.206767	0.209362	0.20735	0.212822	0.213384	0.213102	0.214417	0.214561	0.216134	0.214342	0.215355	0.208068	0.212033	0.211113	0.214054	0.215166	0.213982	0.213689	0.217206	0.21714	0.215009	0.214929	0.211634	0.214301	0.212669	0.209537	0.209875	0.210155	0.211725	0.215132	0.214622	0.214426	0.216305	0.21279	0.212692	0.211402	0.214137	0.213471	0.214009	0.212426	0.214696	0.216543	0.213452	0.214236
3	PI4KB_MOUSE|Q8BKC8_S258	0.208324	0.205304	0.21126	0.218168	0.217209	0.219148	0.219236	0.211895	0.213722	0.213485	0.212963	0.206347	0.211035	0.207088	0.215581	0.218025	0.217271	0.217714	0.210221	0.21412	0.210716	0.210688	0.21324	0.21282	0.215013	0.213646	0.213948	0.213289	0.214087	0.212543	0.213778	0.214919	0.21283	0.212374	0.213451	0.214207	0.213389	0.212153	0.212314	0.212765	0.211829	0.214053	0.211645	0.212077
3	PI4KB_MOUSE|Q8BKC8_S511	0.210018	0.210676	0.211309	0.2133	0.214497	0.211453	0.21361	0.216991	0.215632	0.215056	0.216597	0.205289	0.208079	0.216348	0.213163	0.214727	0.211934	0.212888	0.216608	0.21508	0.213786	0.212958	0.21324	0.21282	0.215013	0.213646	0.213948	0.213289	0.214087	0.212543	0.213778	0.214919	0.21283	0.212374	0.213451	0.214207	0.213389	0.212153	0.212314	0.212765	0.211829	0.214053	0.211645	0.212077
3	PI51C_MOUSE|O70161_S554_S555	0.209798	0.20925	0.20841	0.210117	0.213801	0.214414	0.215422	0.212597	0.213312	0.215902	0.216432	0.213832	0.212589	0.206893	0.215828	0.212373	0.211181	0.211052	0.216259	0.216567	0.216297	0.217641	0.211043	0.213648	0.210563	0.214344	0.214319	0.21271	0.212203	0.213153	0.215042	0.214557	0.21718	0.213689	0.212744	0.211524	0.214068	0.211778	0.210412	0.212425	0.21323	0.212812	0.212104	0.216715
3	PININ_MOUSE|O35691_S68	0.204954	0.212101	0.212478	0.216264	0.215227	0.215232	0.214182	0.21221	0.21667	0.214623	0.210676	0.205153	0.209264	0.215842	0.21541	0.220568	0.21323	0.216568	0.213854	0.213698	0.210588	0.210968	0.213987	0.212219	0.218104	0.214416	0.213806	0.213857	0.214513	0.214105	0.213252	0.21567	0.213497	0.213026	0.212074	0.213061	0.212542	0.211741	0.211711	0.212225	0.212287	0.210892	0.211811	0.21149
3	PKHA2_MOUSE|Q9ERS5_S184	0.20621	0.200007	0.206544	0.213609	0.215897	0.220569	0.219604	0.213927	0.212813	0.220122	0.21765	0.209164	0.211928	0.20874	0.213498	0.217942	0.213686	0.209974	0.21523	0.217051	0.210528	0.214462	0.21242	0.210661	0.215199	0.211777	0.214441	0.211926	0.213713	0.211955	0.213978	0.214363	0.214569	0.21423	0.213441	0.214168	0.213008	0.212153	0.213714	0.21256	0.214011	0.212881	0.21185	0.21333
3	PKHA2_MOUSE|Q9ERS5_S314	0.204174	0.205905	0.204955	0.21223	0.213934	0.218587	0.2169	0.210666	0.214757	0.214729	0.215248	0.210021	0.212816	0.209613	0.215361	0.218833	0.216475	0.214058	0.21676	0.219137	0.212495	0.211861	0.21242	0.210661	0.215199	0.211777	0.214441	0.211926	0.213713	0.211955	0.213978	0.214363	0.214569	0.21423	0.213441	0.214168	0.213008	0.212153	0.213714	0.21256	0.214011	0.212881	0.21185	0.21333
3	PKHA2_MOUSE|Q9ERS5_T133	0.207265	0.207764	0.206023	0.216105	0.221041	0.221177	0.219797	0.207507	0.209044	0.210125	0.210426	0.210994	0.209912	0.211728	0.216762	0.224872	0.220995	0.218746	0.211083	0.211764	0.206802	0.208878	0.21242	0.210661	0.215199	0.211777	0.214441	0.211926	0.213713	0.211955	0.213978	0.214363	0.214569	0.21423	0.213441	0.214168	0.213008	0.212153	0.213714	0.21256	0.214011	0.212881	0.21185	0.21333
3	PKHA2_MOUSE|Q9ERS5_T188	0.206251	0.209634	0.19994	0.214037	0.216497	0.217394	0.215023	0.214135	0.212697	0.216727	0.214845	0.209021	0.212947	0.215946	0.213579	0.218779	0.213959	0.209444	0.215523	0.217792	0.211568	0.213773	0.21242	0.210661	0.215199	0.211777	0.214441	0.211926	0.213713	0.211955	0.213978	0.214363	0.214569	0.21423	0.213441	0.214168	0.213008	0.212153	0.213714	0.21256	0.214011	0.212881	0.21185	0.21333
3	PKHG3_MOUSE|Q4VAC9_S1141	0.2128	0.210832	0.210637	0.216281	0.215012	0.21543	0.216003	0.211408	0.212412	0.212744	0.211627	0.213909	0.214903	0.213374	0.21272	0.213572	0.215867	0.213716	0.212435	0.211813	0.211579	0.211188	0.213671	0.212921	0.216097	0.214498	0.215004	0.214156	0.212634	0.212179	0.211659	0.213771	0.21088	0.215666	0.212563	0.21456	0.213496	0.213166	0.2127	0.213222	0.209715	0.211767	0.211939	0.214035
3	PKHM3_MOUSE|Q8BM47_S350	0.207405	0.205373	0.20308	0.212085	0.209259	0.218797	0.217263	0.20983	0.208377	0.212565	0.213907	0.215852	0.217369	0.207812	0.216817	0.221252	0.21909	0.217456	0.215785	0.217715	0.211088	0.211026	0.213374	0.21031	0.218096	0.21075	0.209032	0.209772	0.214091	0.209732	0.21182	0.211014	0.213715	0.214386	0.21217	0.21561	0.214768	0.214237	0.213549	0.21409	0.214564	0.217263	0.211884	0.21589
3	PKN2_MOUSE|Q8BWW9_S582	0.205026	0.211887	0.210196	0.214332	0.218563	0.212368	0.212547	0.212318	0.214152	0.213014	0.213274	0.208583	0.208529	0.213988	0.216198	0.217346	0.215891	0.215015	0.214942	0.214155	0.213866	0.213766	0.214479	0.213613	0.21891	0.214914	0.213297	0.213532	0.213573	0.214368	0.210946	0.214305	0.213514	0.211814	0.213224	0.213231	0.211448	0.212669	0.210754	0.212353	0.212931	0.212203	0.212113	0.212082
3	PLCL2_MOUSE|Q8K394_S16	0.211685	0.212698	0.211365	0.214923	0.217102	0.215412	0.21368	0.211415	0.214893	0.211379	0.208405	0.208486	0.213283	0.214361	0.212574	0.216922	0.216798	0.215587	0.210709	0.214026	0.212615	0.211799	0.211724	0.213076	0.21546	0.211605	0.212422	0.210915	0.211299	0.212078	0.212827	0.210926	0.212045	0.212606	0.214595	0.215045	0.21396	0.214264	0.214431	0.214076	0.213976	0.214671	0.214191	0.214128
3	PLEC_MOUSE|Q9QXS1_S3317	0.210949	0.212541	0.213731	0.215644	0.214248	0.214403	0.215394	0.214505	0.216035	0.214221	0.215146	0.20655	0.213811	0.212208	0.21083	0.213319	0.211182	0.213122	0.215183	0.214056	0.210815	0.212287	0.211586	0.210004	0.213377	0.213262	0.213833	0.213697	0.214188	0.213184	0.21416	0.213853	0.214453	0.213096	0.21289	0.213211	0.213334	0.212789	0.21224	0.214268	0.213692	0.213113	0.212184	0.213951
3	PLEC_MOUSE|Q9QXS1_S4573	0.203864	0.205922	0.207548	0.214041	0.208149	0.214888	0.214465	0.217321	0.212307	0.222741	0.219962	0.211061	0.213018	0.208208	0.215979	0.214496	0.210563	0.210522	0.218407	0.218748	0.212492	0.214611	0.211586	0.210004	0.213377	0.213262	0.213833	0.213697	0.214188	0.213184	0.21416	0.213853	0.214453	0.213096	0.21289	0.213211	0.213334	0.212789	0.21224	0.214268	0.213692	0.213113	0.212184	0.213951
3	PLEC_MOUSE|Q9QXS1_Y4622	0.208294	0.205868	0.207827	0.215234	0.215526	0.223962	0.217672	0.212559	0.222864	0.219016	0.226004	0.205942	0.20246	0.20079	0.21455	0.209384	0.209923	0.212925	0.217335	0.217274	0.209531	0.213271	0.211586	0.210004	0.213377	0.213262	0.213833	0.213697	0.214188	0.213184	0.21416	0.213853	0.214453	0.213096	0.21289	0.213211	0.213334	0.212789	0.21224	0.214268	0.213692	0.213113	0.212184	0.213951
3	PLIN3_MOUSE|Q9DBG5_S245	0.202539	0.212422	0.213324	0.214106	0.21624	0.210027	0.210295	0.212635	0.216781	0.209734	0.209361	0.209383	0.212335	0.220484	0.213812	0.218698	0.215846	0.21583	0.212577	0.215243	0.216177	0.211837	0.211217	0.210732	0.214318	0.213115	0.214885	0.213617	0.214064	0.211159	0.212914	0.214486	0.2127	0.214868	0.214512	0.214292	0.212353	0.214441	0.213214	0.213176	0.21126	0.214535	0.211579	0.212888
3	PLIN3_MOUSE|Q9DBG5_Y53	0.210499	0.208572	0.213375	0.211242	0.213053	0.217231	0.215914	0.209942	0.214441	0.215988	0.21393	0.212747	0.210114	0.213616	0.215804	0.212127	0.216116	0.209862	0.216685	0.216725	0.20774	0.214296	0.211217	0.210732	0.214318	0.213115	0.214885	0.213617	0.214064	0.211159	0.212914	0.214486	0.2127	0.214868	0.214512	0.214292	0.212353	0.214441	0.213214	0.213176	0.21126	0.214535	0.211579	0.212888
3	PLPL6_MOUSE|Q3TRM4_S356	0.203459	0.219452	0.220859	0.207586	0.216565	0.213278	0.209968	0.21345	0.21331	0.210887	0.212839	0.204656	0.205316	0.210316	0.214485	0.221984	0.215318	0.21681	0.215444	0.220525	0.210078	0.212517	0.211257	0.221206	0.216745	0.210603	0.212089	0.212788	0.210334	0.212629	0.212058	0.211406	0.20927	0.214295	0.21464	0.208684	0.212863	0.213404	0.211772	0.21514	0.214932	0.215201	0.214991	0.21374
3	PLPL7_MOUSE|A2AJ88_S341	0.198504	0.214434	0.211869	0.210904	0.217628	0.216418	0.214084	0.210981	0.217867	0.210265	0.211959	0.203952	0.210449	0.207419	0.216679	0.218982	0.215443	0.216168	0.217091	0.220814	0.213112	0.2141	0.210712	0.219797	0.210232	0.209936	0.211597	0.211398	0.209637	0.212119	0.213138	0.21144	0.21039	0.213945	0.215542	0.208758	0.213561	0.214617	0.21513	0.214387	0.215407	0.217093	0.216714	0.214472
3	PLSL_MOUSE|Q61233_S5	0.208157	0.211368	0.209153	0.211643	0.212562	0.212339	0.2157	0.210276	0.20829	0.207489	0.211627	0.211461	0.213476	0.211879	0.217839	0.220205	0.219032	0.217478	0.2177	0.215435	0.212373	0.214282	0.213358	0.211189	0.213889	0.21446	0.212869	0.21294	0.214365	0.214065	0.213762	0.214341	0.214025	0.211774	0.213424	0.215701	0.213014	0.212023	0.211838	0.212396	0.212721	0.213474	0.211442	0.213281
3	PO121_MOUSE|Q8K3Z9_S441	0.209903	0.214264	0.20673	0.210844	0.213257	0.216127	0.214417	0.211875	0.208469	0.214471	0.214119	0.212342	0.208736	0.205979	0.218035	0.217906	0.214855	0.213395	0.217888	0.216653	0.215927	0.213617	0.213221	0.217697	0.217224	0.212813	0.213032	0.2133	0.209801	0.213984	0.211532	0.210293	0.209145	0.214733	0.213603	0.210242	0.213491	0.210879	0.21475	0.215111	0.213346	0.212637	0.215897	0.213433
3	POGZ_MOUSE|Q8BZH4_S1360	0.204866	0.215545	0.215934	0.218402	0.216618	0.214107	0.212935	0.215569	0.218203	0.21218	0.21304	0.205436	0.208543	0.211094	0.214089	0.208944	0.210536	0.215823	0.215259	0.215253	0.213213	0.214165	0.213291	0.214807	0.216803	0.21412	0.213588	0.213393	0.211078	0.215032	0.214157	0.213335	0.212184	0.211475	0.211501	0.211374	0.212914	0.211952	0.214451	0.213397	0.211954	0.212524	0.213681	0.213308
3	PP12C_MOUSE|Q3UMT1_S431	0.208856	0.203795	0.217158	0.217761	0.217293	0.216854	0.219379	0.210927	0.212462	0.21655	0.21299	0.209579	0.212764	0.212545	0.216411	0.21275	0.213914	0.216616	0.213473	0.210365	0.20875	0.208484	0.213637	0.209704	0.213722	0.212501	0.213997	0.213285	0.213932	0.213049	0.213456	0.213235	0.211897	0.214066	0.213388	0.215047	0.213395	0.214537	0.214349	0.213748	0.210831	0.212147	0.212999	0.213421
3	PP12C_MOUSE|Q3UMT1_S454	0.212646	0.209343	0.212167	0.217072	0.217044	0.213841	0.214167	0.212376	0.21182	0.210903	0.210129	0.212146	0.213301	0.217992	0.215498	0.215032	0.216825	0.21555	0.21121	0.207446	0.211414	0.212127	0.213637	0.209704	0.213722	0.212501	0.213997	0.213285	0.213932	0.213049	0.213456	0.213235	0.211897	0.214066	0.213388	0.215047	0.213395	0.214537	0.214349	0.213748	0.210831	0.212147	0.212999	0.213421
3	PP12C_MOUSE|Q3UMT1_S647	0.212626	0.207967	0.204047	0.21123	0.21666	0.214914	0.214823	0.214278	0.214209	0.216529	0.212634	0.210043	0.209904	0.211624	0.213658	0.217274	0.215875	0.213307	0.212835	0.215177	0.214393	0.215925	0.213637	0.209704	0.213722	0.212501	0.213997	0.213285	0.213932	0.213049	0.213456	0.213235	0.211897	0.214066	0.213388	0.215047	0.213395	0.214537	0.214349	0.213748	0.210831	0.212147	0.212999	0.213421
3	PP2BB_MOUSE|P48453_S472	0.207538	0.21419	0.208574	0.215735	0.214196	0.211689	0.211906	0.218692	0.221594	0.215491	0.215192	0.203488	0.203612	0.212807	0.213866	0.213096	0.211868	0.213059	0.216822	0.213619	0.214767	0.217677	0.213724	0.209723	0.218603	0.213635	0.211473	0.213446	0.217545	0.21289	0.215252	0.2159	0.22026	0.212785	0.211546	0.209948	0.212702	0.211531	0.211869	0.209926	0.21379	0.212153	0.210576	0.210742
3	PP6R1_MOUSE|Q7TSI3_S739	0.20217	0.208918	0.205954	0.212853	0.225202	0.217485	0.21873	0.206759	0.212086	0.211615	0.214538	0.214317	0.205036	0.208295	0.220365	0.219106	0.214593	0.218298	0.213107	0.212999	0.213005	0.213486	0.213494	0.212938	0.214286	0.212242	0.214119	0.212504	0.212353	0.213346	0.212853	0.21451	0.212693	0.213261	0.213678	0.21499	0.213689	0.212348	0.212493	0.212822	0.213625	0.212233	0.212748	0.213159
3	PP6R3_MOUSE|Q922D4_T820	0.207114	0.213047	0.210105	0.214223	0.219006	0.220541	0.212663	0.212104	0.209546	0.214804	0.215964	0.209102	0.204909	0.208028	0.217431	0.221711	0.216121	0.213792	0.214327	0.212633	0.206225	0.216012	0.213339	0.212212	0.214474	0.21328	0.21482	0.213861	0.214877	0.213637	0.213658	0.215691	0.213778	0.212464	0.213254	0.213894	0.21329	0.213185	0.211798	0.211722	0.211424	0.212211	0.211059	0.212417
3	PPR18_MOUSE|Q8BQ30_S208	0.209879	0.21244	0.213296	0.217925	0.215844	0.215822	0.21679	0.212908	0.208757	0.211409	0.212996	0.21042	0.209143	0.214159	0.215304	0.217412	0.212777	0.214255	0.210275	0.21509	0.211634	0.211531	0.211863	0.20912	0.213082	0.213755	0.214674	0.214778	0.213399	0.21274	0.21329	0.213893	0.213162	0.214467	0.213372	0.214155	0.213376	0.213949	0.213294	0.213418	0.211186	0.212644	0.213695	0.213031
3	PRAG1_MOUSE|Q571I4_S14	0.211732	0.207991	0.206831	0.215181	0.214968	0.213603	0.213035	0.219855	0.221256	0.219117	0.219848	0.204711	0.20922	0.211239	0.210786	0.209446	0.211055	0.210964	0.213474	0.215305	0.214057	0.215805	0.210149	0.208736	0.211375	0.2145	0.212554	0.211496	0.211271	0.21929	0.221331	0.219326	0.219113	0.20822	0.211321	0.210141	0.208257	0.205857	0.21091	0.210207	0.216332	0.216911	0.214904	0.217298
3	PRAG1_MOUSE|Q571I4_S526	0.206925	0.208681	0.210077	0.215346	0.214725	0.215162	0.21294	0.215398	0.218142	0.215355	0.216377	0.205437	0.210362	0.210629	0.212282	0.212785	0.21259	0.212289	0.218287	0.215375	0.214217	0.216463	0.210149	0.208736	0.211375	0.2145	0.212554	0.211496	0.211271	0.21929	0.221331	0.219326	0.219113	0.20822	0.211321	0.210141	0.208257	0.205857	0.21091	0.210207	0.216332	0.216911	0.214904	0.217298
3	PRAG1_MOUSE|Q571I4_S662	0.210135	0.208927	0.202094	0.210815	0.217216	0.222259	0.215834	0.206539	0.211716	0.215258	0.2162	0.214949	0.210903	0.203978	0.216119	0.220156	0.214851	0.216813	0.215426	0.215036	0.209348	0.214639	0.210149	0.208736	0.211375	0.2145	0.212554	0.211496	0.211271	0.21929	0.221331	0.219326	0.219113	0.20822	0.211321	0.210141	0.208257	0.205857	0.21091	0.210207	0.216332	0.216911	0.214904	0.217298
3	PRAG1_MOUSE|Q571I4_S71	0.211072	0.206614	0.211719	0.21479	0.211904	0.216072	0.215679	0.21616	0.215073	0.218296	0.21676	0.208699	0.209275	0.210634	0.212087	0.214182	0.213178	0.209385	0.215506	0.215012	0.212772	0.215097	0.210149	0.208736	0.211375	0.2145	0.212554	0.211496	0.211271	0.21929	0.221331	0.219326	0.219113	0.20822	0.211321	0.210141	0.208257	0.205857	0.21091	0.210207	0.216332	0.216911	0.214904	0.217298
3	PRAM_MOUSE|Q6BCL1_S252	0.207141	0.209557	0.209541	0.211287	0.21582	0.21343	0.212999	0.210346	0.213372	0.211151	0.210689	0.211932	0.211405	0.212789	0.216132	0.218381	0.216521	0.217759	0.214581	0.215536	0.214407	0.215225	0.214252	0.214371	0.194323	0.211767	0.214028	0.213605	0.213203	0.211308	0.214086	0.212084	0.212276	0.217239	0.214835	0.21429	0.216041	0.214769	0.21533	0.212575	0.213593	0.213049	0.217011	0.215387
3	PRC2A_MOUSE|Q7TSC1_S381	0.209423	0.20563	0.214028	0.210879	0.21227	0.214242	0.211699	0.211119	0.212357	0.216645	0.213112	0.211277	0.209706	0.210852	0.214494	0.216307	0.215115	0.213866	0.216804	0.218189	0.215972	0.215986	0.213729	0.212814	0.214071	0.212243	0.213051	0.213392	0.209818	0.21332	0.212319	0.210277	0.209926	0.213249	0.214597	0.213155	0.21326	0.213685	0.216209	0.215214	0.212273	0.213674	0.215977	0.214024
3	PRC2B_MOUSE|Q7TPM1_S555	0.210944	0.21032	0.209944	0.214725	0.214252	0.215827	0.213579	0.214769	0.212703	0.215297	0.211337	0.211285	0.212831	0.213173	0.214306	0.214742	0.214832	0.2138	0.212985	0.213037	0.214491	0.211092	0.21354	0.209609	0.214629	0.213213	0.212744	0.21399	0.212429	0.214966	0.213226	0.213928	0.216217	0.211742	0.211083	0.211856	0.2129	0.21246	0.213979	0.213464	0.213176	0.214336	0.213941	0.21289
3	PRC2C_MOUSE|Q3TLH4_T358	0.210342	0.202819	0.215024	0.211683	0.21235	0.217304	0.216658	0.214419	0.21583	0.218443	0.21532	0.206873	0.208643	0.205787	0.214911	0.214294	0.215858	0.213059	0.216736	0.215541	0.214499	0.213232	0.213125	0.214031	0.214349	0.211558	0.212975	0.212582	0.209757	0.212823	0.211367	0.21019	0.209899	0.214573	0.214108	0.213515	0.214029	0.21373	0.215649	0.215802	0.212962	0.213764	0.214951	0.214531
3	PSB6_MOUSE|Q60692_S12	0.20205	0.208816	0.210848	0.21777	0.215997	0.215536	0.214164	0.207197	0.208491	0.210416	0.212262	0.208677	0.204319	0.210175	0.221156	0.224685	0.220519	0.218377	0.217652	0.213181	0.213158	0.213436	0.212557	0.21251	0.215324	0.214648	0.21232	0.215529	0.212628	0.213259	0.213637	0.216386	0.21351	0.213492	0.210371	0.216356	0.214072	0.214179	0.211175	0.209877	0.211688	0.212431	0.211029	0.213281
3	PSD3_MOUSE|Q2PFD7_S1000	0.209718	0.210047	0.210385	0.208239	0.224798	0.214404	0.213937	0.210016	0.214937	0.213211	0.217192	0.220323	0.211373	0.210675	0.215051	0.216937	0.211805	0.216142	0.202043	0.211746	0.211115	0.21528	0.213096	0.212867	0.217147	0.214485	0.216467	0.215998	0.216403	0.2138	0.215258	0.216002	0.215702	0.211296	0.211553	0.212357	0.211019	0.212919	0.208172	0.210674	0.21064	0.21173	0.210139	0.212396
3	PSD4_MOUSE|Q8BLR5_S462	0.206486	0.201967	0.205177	0.21886	0.217196	0.214263	0.217083	0.217398	0.216583	0.216343	0.218214	0.205156	0.214852	0.208336	0.213177	0.214949	0.220177	0.205339	0.211435	0.213259	0.216769	0.216008	0.213961	0.213511	0.215836	0.214957	0.214589	0.213945	0.214081	0.212912	0.214103	0.214284	0.213173	0.212228	0.212053	0.214873	0.2121	0.212179	0.212078	0.211746	0.211734	0.21246	0.212146	0.211388
3	PSD4_MOUSE|Q8BLR5_S706	0.211495	0.207817	0.20732	0.216816	0.212866	0.219193	0.219692	0.214113	0.205307	0.216454	0.213186	0.215495	0.202557	0.206517	0.215339	0.227819	0.217373	0.215774	0.206659	0.213556	0.212527	0.210933	0.213961	0.213511	0.215836	0.214957	0.214589	0.213945	0.214081	0.212912	0.214103	0.214284	0.213173	0.212228	0.212053	0.214873	0.2121	0.212179	0.212078	0.211746	0.211734	0.21246	0.212146	0.211388
3	PSD4_MOUSE|Q8BLR5_S866	0.207522	0.208713	0.201998	0.216151	0.214782	0.215376	0.215848	0.216001	0.216584	0.218564	0.217275	0.206284	0.209391	0.207018	0.214442	0.214972	0.212021	0.214736	0.21507	0.217239	0.21475	0.214745	0.213961	0.213511	0.215836	0.214957	0.214589	0.213945	0.214081	0.212912	0.214103	0.214284	0.213173	0.212228	0.212053	0.214873	0.2121	0.212179	0.212078	0.211746	0.211734	0.21246	0.212146	0.211388
3	PSMD1_MOUSE|Q3TXS7_T311	0.207725	0.206298	0.209622	0.214906	0.21481	0.213483	0.214754	0.215565	0.213956	0.215938	0.21661	0.207401	0.20792	0.20982	0.213675	0.216361	0.21417	0.2133	0.214871	0.216886	0.215289	0.216494	0.212312	0.214389	0.215615	0.214423	0.213049	0.212552	0.213823	0.212707	0.213535	0.213638	0.214141	0.212805	0.21324	0.21369	0.213494	0.213006	0.211965	0.212595	0.212434	0.212994	0.212108	0.21186
3	PSMD9_MOUSE|Q9CR00_S128	0.211308	0.203738	0.215069	0.214271	0.214398	0.217026	0.218304	0.214521	0.215119	0.219463	0.217878	0.210584	0.210847	0.209592	0.213618	0.212162	0.210718	0.211458	0.213969	0.212009	0.211852	0.21193	0.21534	0.210123	0.217391	0.214671	0.213558	0.214222	0.215416	0.212603	0.212331	0.215263	0.215461	0.213008	0.211415	0.212614	0.214002	0.213114	0.211453	0.211379	0.210596	0.211498	0.212429	0.21236
3	PTN2_MOUSE|Q06180_S298	0.211407	0.212651	0.205589	0.217372	0.217551	0.219919	0.217423	0.211829	0.209143	0.213541	0.211914	0.209744	0.210684	0.209904	0.217173	0.22163	0.218971	0.213346	0.212065	0.208712	0.208893	0.210063	0.213259	0.215436	0.212553	0.214273	0.213419	0.211693	0.211827	0.213992	0.212263	0.212068	0.212055	0.212572	0.213557	0.213893	0.214187	0.212551	0.214359	0.2128	0.211796	0.213814	0.213282	0.214713
3	PTN22_MOUSE|P29352_S452	0.209329	0.21105	0.205224	0.215479	0.215989	0.214702	0.211206	0.217479	0.217155	0.214251	0.211223	0.20999	0.212633	0.21437	0.210563	0.212758	0.214989	0.215071	0.21331	0.214025	0.214136	0.215078	0.214951	0.21699	0.217502	0.213419	0.213279	0.211967	0.207325	0.214241	0.21315	0.212112	0.21059	0.214252	0.214265	0.211877	0.212329	0.211784	0.214114	0.216262	0.21103	0.210762	0.214002	0.213956
3	PTN6_MOUSE|P29351_S10	0.207096	0.207393	0.206829	0.213488	0.211593	0.213617	0.212868	0.214907	0.213106	0.215302	0.213821	0.21081	0.21241	0.210866	0.215861	0.214574	0.214686	0.215101	0.217822	0.216105	0.216169	0.21554	0.212083	0.21166	0.216965	0.212661	0.213706	0.211089	0.214437	0.212095	0.212725	0.210511	0.214283	0.21408	0.212662	0.214609	0.213567	0.2138	0.21327	0.215813	0.213074	0.212548	0.212715	0.211952
3	PUM1_MOUSE|Q80U78_S98	0.20738	0.208297	0.210558	0.214625	0.21367	0.212976	0.210796	0.217408	0.218083	0.212282	0.213107	0.208672	0.211112	0.208515	0.21292	0.211188	0.217614	0.212666	0.214801	0.215323	0.218996	0.218821	0.214156	0.212781	0.21513	0.215293	0.213875	0.215011	0.214175	0.213004	0.214329	0.214076	0.212885	0.213626	0.211413	0.211705	0.212413	0.212127	0.214375	0.212361	0.211992	0.211081	0.211127	0.2134
3	Q3TSY9_MOUSE|Q3TSY9_S445	0.203923	0.206063	0.207419	0.216001	0.214524	0.213798	0.213196	0.21398	0.214182	0.213803	0.213925	0.209096	0.208924	0.211386	0.216641	0.217133	0.217931	0.215406	0.215655	0.21555	0.215269	0.21591	0.221496	0.216579	0.225154	0.213292	0.211804	0.207839	0.205615	0.211337	0.208631	0.205676	0.206569	0.222022	0.216624	0.222239	0.208652	0.206883	0.213776	0.213863	0.212261	0.207087	0.217875	0.213433
3	Q3TYY8_MOUSE|Q3TYY8_S210	0.209868	0.212572	0.207276	0.213099	0.213654	0.215182	0.214337	0.208614	0.211156	0.212027	0.213253	0.215449	0.21279	0.213096	0.217314	0.217993	0.21548	0.215095	0.213577	0.214288	0.213087	0.210883	0.212039	0.21114	0.214659	0.215475	0.215571	0.214339	0.213965	0.210432	0.213155	0.213017	0.209832	0.213906	0.21483	0.215263	0.214639	0.213008	0.216371	0.213265	0.209607	0.212532	0.213515	0.209656
3	Q3TZR9_MOUSE|Q3TZR9_S423	0.20394	0.2102	0.213763	0.214536	0.21606	0.218569	0.216984	0.21498	0.218234	0.212432	0.212254	0.214519	0.21254	0.205514	0.216613	0.210461	0.215368	0.218059	0.212432	0.20992	0.210053	0.21226	0.21177	0.219967	0.225123	0.213482	0.216496	0.208333	0.20935	0.213202	0.215425	0.214043	0.210859	0.213888	0.216421	0.223671	0.214839	0.212334	0.208419	0.204453	0.209681	0.202611	0.210942	0.213691
3	Q3U0X6_MOUSE|Q3U0X6_S415	0.209561	0.214367	0.210864	0.215253	0.217804	0.216881	0.214194	0.215604	0.217714	0.217283	0.215088	0.206602	0.206907	0.208403	0.212365	0.213494	0.212769	0.210997	0.214917	0.212747	0.213729	0.21235	0.213905	0.218013	0.21285	0.215072	0.218225	0.215076	0.209935	0.216879	0.218565	0.214153	0.213971	0.210411	0.207389	0.212069	0.209992	0.209739	0.211004	0.212717	0.210615	0.21146	0.213587	0.214339
3	Q3U1M7_MOUSE|Q3U1M7_S401	0.210431	0.210611	0.211529	0.219074	0.215988	0.217631	0.218726	0.214907	0.215469	0.216085	0.214742	0.207558	0.211914	0.208862	0.21343	0.214994	0.214729	0.214551	0.211441	0.209909	0.20925	0.208013	0.215271	0.212482	0.217386	0.215556	0.21546	0.215002	0.214563	0.212775	0.212596	0.214676	0.213562	0.213325	0.211302	0.211972	0.21261	0.211667	0.212526	0.21326	0.210448	0.211075	0.211	0.211741
3	Q3U1M7_MOUSE|Q3U1M7_S420	0.208983	0.219329	0.210317	0.21916	0.218591	0.212615	0.214451	0.211088	0.216151	0.207996	0.210453	0.206517	0.20597	0.217519	0.213706	0.214055	0.216046	0.214402	0.214477	0.213966	0.21379	0.210094	0.215271	0.212482	0.217386	0.215556	0.21546	0.215002	0.214563	0.212775	0.212596	0.214676	0.213562	0.213325	0.211302	0.211972	0.21261	0.211667	0.212526	0.21326	0.210448	0.211075	0.211	0.211741
3	Q3U2N8_MOUSE|Q3U2N8_S748	0.205924	0.212175	0.211002	0.215205	0.222894	0.217462	0.216217	0.211952	0.215603	0.214618	0.213211	0.204221	0.205888	0.20793	0.215445	0.219206	0.21657	0.214992	0.212276	0.213546	0.210821	0.212276	0.212356	0.215815	0.218842	0.2118	0.212476	0.213054	0.213596	0.211012	0.212148	0.215238	0.212675	0.215054	0.2125	0.212265	0.214277	0.214078	0.211821	0.211679	0.212673	0.213582	0.21213	0.211183
3	Q3UHC1_MOUSE|Q3UHC1_S364	0.209023	0.208191	0.204884	0.215098	0.217513	0.217794	0.21587	0.215329	0.211904	0.218736	0.216065	0.205846	0.205678	0.207126	0.216276	0.218688	0.215001	0.214158	0.216807	0.212958	0.213092	0.213411	0.215784	0.211133	0.215682	0.214416	0.214134	0.213697	0.213653	0.212395	0.213255	0.209535	0.211124	0.214597	0.212605	0.213888	0.211364	0.209738	0.211139	0.214475	0.211886	0.213401	0.21615	0.216174
3	Q3UQ19_MOUSE|Q3UQ19_Y317	0.214275	0.210729	0.213917	0.211701	0.21301	0.219829	0.212757	0.213518	0.214544	0.213584	0.215756	0.211679	0.207862	0.21066	0.215102	0.211595	0.21334	0.212643	0.215235	0.213528	0.211745	0.213142	0.213148	0.207315	0.217586	0.212409	0.214619	0.21591	0.214683	0.21203	0.212537	0.213094	0.212722	0.214179	0.212389	0.215855	0.214822	0.212747	0.212773	0.213357	0.211735	0.211892	0.211157	0.213251
3	Q3V3T8_MOUSE|Q3V3T8_S593	0.213169	0.203203	0.214238	0.21396	0.213382	0.21612	0.216972	0.213404	0.214668	0.218077	0.217687	0.211035	0.212559	0.210574	0.212932	0.211998	0.212555	0.211458	0.214491	0.212544	0.211446	0.213492	0.215311	0.210379	0.213348	0.215452	0.214825	0.214405	0.212846	0.214527	0.214011	0.213777	0.212472	0.213443	0.211721	0.213728	0.211762	0.211169	0.214498	0.21264	0.211021	0.211097	0.213007	0.214867
3	Q3ZAQ4_MOUSE|Q3ZAQ4_S656	0.207074	0.2107	0.215367	0.210439	0.211547	0.21333	0.212852	0.215931	0.219044	0.214807	0.217107	0.208309	0.209043	0.21051	0.213037	0.209396	0.212049	0.21317	0.220362	0.217563	0.213569	0.21461	0.216169	0.217163	0.216091	0.214153	0.214196	0.212452	0.209727	0.209946	0.211926	0.210701	0.208412	0.212963	0.213131	0.211167	0.211071	0.211646	0.215905	0.215392	0.215178	0.213204	0.215369	0.214166
3	Q5RIM6_MOUSE|Q5RIM6_S2099	0.215142	0.211283	0.214226	0.214385	0.216128	0.214594	0.214935	0.212013	0.215471	0.21448	0.214763	0.209223	0.211804	0.206634	0.211222	0.213378	0.215085	0.212907	0.214533	0.210565	0.212835	0.214542	0.21337	0.210236	0.215321	0.214843	0.21431	0.211875	0.213042	0.214702	0.214059	0.214153	0.211805	0.214586	0.20999	0.216394	0.212815	0.213082	0.213452	0.213172	0.210695	0.210013	0.213668	0.214678
3	Q68FM7_MOUSE|Q68FM7_T702	0.209358	0.210157	0.211973	0.213746	0.211972	0.214455	0.214465	0.211584	0.210752	0.217351	0.21674	0.214771	0.21259	0.214556	0.213338	0.217339	0.209974	0.211557	0.214491	0.215438	0.210822	0.212712	0.213872	0.212239	0.218621	0.213262	0.214569	0.213501	0.214692	0.212766	0.214139	0.213548	0.213893	0.212953	0.212817	0.213748	0.211931	0.212226	0.210578	0.21288	0.21119	0.212507	0.210106	0.214232
3	Q6PDZ4_MOUSE|Q6PDZ4_S46	0.209846	0.210145	0.202474	0.216444	0.216617	0.217158	0.213198	0.214572	0.212058	0.215764	0.210773	0.204968	0.208392	0.214863	0.216255	0.221874	0.219108	0.214675	0.213493	0.213168	0.211136	0.212475	0.215721	0.216704	0.211903	0.210571	0.209508	0.216175	0.210649	0.211228	0.207933	0.216499	0.211255	0.218604	0.21194	0.217442	0.214092	0.219202	0.210847	0.208553	0.211082	0.215079	0.213001	0.211898
3	Q7TNL5_MOUSE|Q7TNL5_S566	0.209141	0.210207	0.21059	0.213171	0.21349	0.215247	0.212147	0.215946	0.209684	0.214066	0.214176	0.212672	0.214584	0.214534	0.213393	0.215711	0.214347	0.213219	0.215461	0.213861	0.211885	0.212702	0.215801	0.21505	0.217945	0.214081	0.214177	0.213587	0.212063	0.211909	0.214866	0.212082	0.212874	0.21407	0.211059	0.21277	0.212048	0.211768	0.21151	0.215071	0.210347	0.211558	0.212107	0.213511
3	Q80VE5_MOUSE|Q80VE5_S116	0.205148	0.214723	0.21547	0.214574	0.218816	0.217232	0.213937	0.215378	0.217521	0.214847	0.214314	0.206628	0.209771	0.213857	0.212762	0.217163	0.211799	0.211828	0.210442	0.213855	0.209454	0.210295	0.215419	0.214854	0.218309	0.216019	0.214227	0.211776	0.211436	0.214138	0.21426	0.212424	0.212903	0.212357	0.213807	0.21303	0.20999	0.211541	0.213148	0.213182	0.210032	0.211071	0.21226	0.214041
3	Q80VE5_MOUSE|Q80VE5_T117	0.205251	0.21286	0.215435	0.213559	0.216343	0.215778	0.21237	0.215204	0.217243	0.216183	0.21473	0.209787	0.210099	0.209759	0.21268	0.218541	0.214215	0.213283	0.209626	0.213974	0.211559	0.21147	0.215419	0.214854	0.218309	0.216019	0.214227	0.211776	0.211436	0.214138	0.21426	0.212424	0.212903	0.212357	0.213807	0.21303	0.20999	0.211541	0.213148	0.213182	0.210032	0.211071	0.21226	0.214041
3	Q80Y32_MOUSE|Q80Y32_S105	0.207585	0.211347	0.210054	0.216676	0.218359	0.217706	0.217321	0.216265	0.213752	0.217924	0.215792	0.206272	0.209749	0.204035	0.214705	0.213795	0.215426	0.212537	0.215165	0.212349	0.212639	0.210198	0.21243	0.216721	0.225606	0.211296	0.217103	0.213225	0.212	0.215898	0.214692	0.211481	0.216257	0.212411	0.210152	0.207564	0.209566	0.210465	0.212101	0.213459	0.211078	0.21206	0.21219	0.212003
3	Q8BKS2_MOUSE|Q8BKS2_S749	0.209674	0.21397	0.212023	0.215307	0.218613	0.214671	0.216094	0.21045	0.213067	0.214719	0.213191	0.211397	0.212174	0.212359	0.214135	0.216394	0.212089	0.213974	0.211248	0.212701	0.209641	0.212279	0.213732	0.211969	0.215952	0.212792	0.215935	0.213906	0.214274	0.21352	0.216774	0.21411	0.214481	0.212307	0.211761	0.21225	0.21113	0.212084	0.210961	0.213697	0.211657	0.211354	0.211875	0.213761
3	Q8BKS2_MOUSE|Q8BKS2_S854	0.204471	0.209297	0.20712	0.215517	0.215196	0.207746	0.210257	0.217245	0.21939	0.216817	0.212595	0.206691	0.211493	0.213496	0.213261	0.209199	0.213366	0.213919	0.21706	0.217392	0.220429	0.2175	0.213732	0.211969	0.215952	0.212792	0.215935	0.213906	0.214274	0.21352	0.216774	0.21411	0.214481	0.212307	0.211761	0.21225	0.21113	0.212084	0.210961	0.213697	0.211657	0.211354	0.211875	0.213761
3	Q8BRB8_MOUSE|Q8BRB8_S116	0.208359	0.207689	0.208003	0.215458	0.217791	0.213096	0.218677	0.212321	0.215708	0.210232	0.216396	0.20886	0.212324	0.207491	0.213211	0.214576	0.215121	0.220039	0.214857	0.213586	0.212207	0.213779	0.212957	0.211188	0.215192	0.2143	0.21689	0.213792	0.214677	0.213231	0.216003	0.214309	0.21527	0.212454	0.213647	0.211823	0.210679	0.211403	0.210321	0.212021	0.211277	0.21151	0.212266	0.215037
3	Q8BRB8_MOUSE|Q8BRB8_S136	0.210452	0.21431	0.211119	0.211783	0.215967	0.214655	0.213636	0.211152	0.213075	0.211685	0.213946	0.212476	0.213089	0.213863	0.213545	0.21547	0.213266	0.214542	0.213084	0.216011	0.208218	0.214894	0.212957	0.211188	0.215192	0.2143	0.21689	0.213792	0.214677	0.213231	0.216003	0.214309	0.21527	0.212454	0.213647	0.211823	0.210679	0.211403	0.210321	0.212021	0.211277	0.21151	0.212266	0.215037
3	Q8BRB8_MOUSE|Q8BRB8_S211	0.206996	0.205468	0.216726	0.215542	0.220547	0.218626	0.220123	0.215173	0.220435	0.219334	0.220796	0.20099	0.207247	0.205456	0.212684	0.214593	0.209806	0.212501	0.211833	0.213628	0.208623	0.211687	0.212957	0.211188	0.215192	0.2143	0.21689	0.213792	0.214677	0.213231	0.216003	0.214309	0.21527	0.212454	0.213647	0.211823	0.210679	0.211403	0.210321	0.212021	0.211277	0.21151	0.212266	0.215037
3	Q8BRB8_MOUSE|Q8BRB8_S213_S217	0.203431	0.209536	0.214055	0.216414	0.223623	0.21363	0.21845	0.208763	0.212962	0.214764	0.217802	0.207787	0.204988	0.217424	0.216893	0.221195	0.203707	0.209354	0.2112	0.212695	0.213089	0.217207	0.212957	0.211188	0.215192	0.2143	0.21689	0.213792	0.214677	0.213231	0.216003	0.214309	0.21527	0.212454	0.213647	0.211823	0.210679	0.211403	0.210321	0.212021	0.211277	0.21151	0.212266	0.215037
3	Q8BRB8_MOUSE|Q8BRB8_S232	0.203334	0.211779	0.210121	0.211417	0.218213	0.21182	0.213527	0.214412	0.218551	0.215216	0.214744	0.206708	0.205824	0.212258	0.213878	0.217891	0.215089	0.214159	0.215289	0.217164	0.213775	0.214491	0.212957	0.211188	0.215192	0.2143	0.21689	0.213792	0.214677	0.213231	0.216003	0.214309	0.21527	0.212454	0.213647	0.211823	0.210679	0.211403	0.210321	0.212021	0.211277	0.21151	0.212266	0.215037
3	Q8BV04_MOUSE|Q8BV04_S147	0.212862	0.209918	0.211184	0.213817	0.216659	0.214518	0.213717	0.211954	0.211042	0.210459	0.208644	0.211633	0.213047	0.214972	0.2131	0.220461	0.219501	0.219487	0.211819	0.209477	0.211017	0.210593	0.211885	0.207262	0.215341	0.215995	0.21436	0.212674	0.21254	0.212544	0.214863	0.212975	0.213595	0.214349	0.211276	0.212836	0.213813	0.211184	0.2166	0.215335	0.210898	0.211894	0.216033	0.211934
3	Q8BW36_MOUSE|Q8BW36_S34	0.208575	0.210755	0.212837	0.211793	0.214599	0.211158	0.211536	0.21356	0.217192	0.214001	0.212841	0.210103	0.205652	0.213111	0.214146	0.215706	0.214857	0.216773	0.215258	0.214841	0.216228	0.214514	0.21319	0.21486	0.218254	0.212693	0.21555	0.213331	0.212485	0.215434	0.216689	0.214437	0.214754	0.214595	0.210011	0.21207	0.212034	0.209067	0.210592	0.214695	0.211149	0.21054	0.210436	0.213281
3	Q8BW36_MOUSE|Q8BW36_T106	0.208795	0.212692	0.212364	0.211048	0.216854	0.212196	0.211518	0.215221	0.213289	0.213995	0.216056	0.213834	0.210659	0.210588	0.214941	0.215584	0.215042	0.213956	0.214159	0.209854	0.211847	0.215687	0.21319	0.21486	0.218254	0.212693	0.21555	0.213331	0.212485	0.215434	0.216689	0.214437	0.214754	0.214595	0.210011	0.21207	0.212034	0.209067	0.210592	0.214695	0.211149	0.21054	0.210436	0.213281
3	Q8BW36_MOUSE|Q8BW36_T108	0.209448	0.213907	0.207734	0.209956	0.218112	0.213083	0.208606	0.214862	0.213634	0.213062	0.213468	0.214527	0.20883	0.210265	0.216469	0.218812	0.216876	0.219692	0.211854	0.208942	0.211293	0.216365	0.21319	0.21486	0.218254	0.212693	0.21555	0.213331	0.212485	0.215434	0.216689	0.214437	0.214754	0.214595	0.210011	0.21207	0.212034	0.209067	0.210592	0.214695	0.211149	0.21054	0.210436	0.213281
3	Q8R2L7_MOUSE|Q8R2L7_S94	0.209949	0.208822	0.20937	0.213254	0.217669	0.216616	0.218344	0.209154	0.217133	0.213316	0.219152	0.210689	0.214809	0.205567	0.214016	0.213437	0.211978	0.213937	0.21459	0.212917	0.2092	0.215876	0.223265	0.212499	0.216863	0.209151	0.208107	0.207964	0.208419	0.215347	0.214043	0.210958	0.211965	0.22023	0.222699	0.215608	0.206611	0.203737	0.21189	0.214827	0.214804	0.20951	0.214324	0.216352
3	Q8R2L7_MOUSE|Q8R2L7_T102	0.210579	0.212089	0.212814	0.212497	0.218748	0.214445	0.213188	0.208402	0.213794	0.21171	0.212345	0.213693	0.212968	0.211385	0.21331	0.214999	0.213778	0.214906	0.214143	0.212047	0.212171	0.216195	0.223265	0.212499	0.216863	0.209151	0.208107	0.207964	0.208419	0.215347	0.214043	0.210958	0.211965	0.22023	0.222699	0.215608	0.206611	0.203737	0.21189	0.214827	0.214804	0.20951	0.214324	0.216352
3	Q9CQP1_MOUSE|Q9CQP1_S15	0.21181	0.208309	0.221692	0.21779	0.214874	0.210937	0.211056	0.213628	0.209289	0.21124	0.213589	0.206764	0.207704	0.210387	0.21677	0.212478	0.217457	0.218183	0.213572	0.213194	0.214935	0.214076	0.211471	0.222561	0.217658	0.211423	0.214691	0.202015	0.20136	0.209997	0.213723	0.21113	0.212426	0.21918	0.211141	0.220546	0.214751	0.215224	0.213315	0.211944	0.208829	0.210859	0.216047	0.218804
3	Q9CS54_MOUSE|Q9CS54_S147_S151	0.211168	0.208424	0.214169	0.214713	0.214287	0.21794	0.215089	0.209164	0.209864	0.208094	0.210861	0.21436	0.216848	0.21061	0.214626	0.214622	0.216061	0.215601	0.214311	0.212399	0.213942	0.212893	0.211636	0.20962	0.215785	0.21462	0.216906	0.214204	0.213247	0.212854	0.211988	0.213429	0.212256	0.213854	0.212744	0.21313	0.214183	0.213701	0.213951	0.215978	0.20913	0.211989	0.212905	0.212141
3	Q9CSS1_MOUSE|Q9CSS1_S523	0.212892	0.215464	0.209389	0.212864	0.216805	0.214129	0.211399	0.212358	0.213762	0.214724	0.213149	0.212681	0.207618	0.20838	0.214566	0.213918	0.213704	0.215044	0.21442	0.212308	0.215247	0.215333	0.213729	0.213849	0.215712	0.213979	0.212111	0.213393	0.211921	0.214781	0.21402	0.212972	0.212299	0.214442	0.210394	0.213225	0.210861	0.213171	0.214506	0.213625	0.213359	0.211661	0.212657	0.213669
3	Q9CSS1_MOUSE|Q9CSS1_S59	0.212767	0.210609	0.209154	0.216151	0.215734	0.210819	0.210703	0.21514	0.217401	0.219094	0.21493	0.208156	0.212393	0.20962	0.213548	0.20901	0.21533	0.212254	0.214456	0.211853	0.215791	0.215067	0.213729	0.213849	0.215712	0.213979	0.212111	0.213393	0.211921	0.214781	0.21402	0.212972	0.212299	0.214442	0.210394	0.213225	0.210861	0.213171	0.214506	0.213625	0.213359	0.211661	0.212657	0.213669
3	RAF1_MOUSE|Q99N57_S642	0.206289	0.219671	0.205402	0.214242	0.222578	0.213731	0.210415	0.207793	0.208773	0.200972	0.205328	0.207308	0.206627	0.216016	0.216823	0.225066	0.224716	0.223805	0.215679	0.213464	0.210667	0.212692	0.211367	0.208036	0.213822	0.210989	0.212113	0.211021	0.21164	0.21151	0.212215	0.210648	0.209051	0.212918	0.21304	0.216452	0.214994	0.215997	0.217817	0.215658	0.2132	0.216307	0.215476	0.215811
3	RAI14_MOUSE|Q9EP71_S318	0.205552	0.208542	0.207885	0.215027	0.214833	0.212969	0.21596	0.214224	0.213596	0.214141	0.211833	0.209434	0.213732	0.215988	0.214687	0.215133	0.214802	0.212729	0.215552	0.216159	0.2142	0.213034	0.212349	0.208986	0.21257	0.213268	0.212161	0.212542	0.212115	0.21313	0.210725	0.213045	0.211779	0.214184	0.21373	0.216618	0.213785	0.216387	0.21546	0.213046	0.212902	0.213098	0.214216	0.214179
3	RANB3_MOUSE|Q9CT10_S57	0.212003	0.209617	0.21259	0.216396	0.217279	0.212514	0.213345	0.215146	0.21569	0.212349	0.213135	0.208596	0.211028	0.216528	0.212249	0.21367	0.216564	0.213364	0.210543	0.211695	0.213485	0.212366	0.213805	0.209956	0.215062	0.215761	0.21616	0.212605	0.213988	0.213352	0.216757	0.212781	0.213282	0.210614	0.211016	0.21478	0.21247	0.210457	0.2143	0.214222	0.213293	0.209403	0.212373	0.213784
3	RASA3_MOUSE|Q60790_S809	0.209525	0.210884	0.214743	0.212896	0.216552	0.211826	0.213564	0.214723	0.215767	0.214609	0.215773	0.210422	0.210674	0.212034	0.212961	0.213941	0.213239	0.212909	0.21228	0.213348	0.212716	0.214862	0.21516	0.21565	0.218072	0.213583	0.214344	0.212642	0.214249	0.211875	0.214164	0.212956	0.213211	0.214	0.212263	0.214384	0.212861	0.212508	0.211489	0.211947	0.210666	0.210805	0.211487	0.21195
3	RASA3_MOUSE|Q60790_S833	0.204247	0.213954	0.209652	0.213367	0.221843	0.21135	0.213089	0.210272	0.21616	0.213388	0.21213	0.213517	0.209758	0.209439	0.217068	0.215853	0.213982	0.219756	0.207857	0.214933	0.211372	0.216659	0.21516	0.21565	0.218072	0.213583	0.214344	0.212642	0.214249	0.211875	0.214164	0.212956	0.213211	0.214	0.212263	0.214384	0.212861	0.212508	0.211489	0.211947	0.210666	0.210805	0.211487	0.21195
3	RASA3_MOUSE|Q60790_T805	0.21089	0.208477	0.214601	0.213975	0.218074	0.212623	0.214018	0.215911	0.21914	0.215348	0.21613	0.207474	0.212278	0.211481	0.210901	0.212224	0.21272	0.212989	0.210363	0.212624	0.213358	0.214432	0.21516	0.21565	0.218072	0.213583	0.214344	0.212642	0.214249	0.211875	0.214164	0.212956	0.213211	0.214	0.212263	0.214384	0.212861	0.212508	0.211489	0.211947	0.210666	0.210805	0.211487	0.21195
3	RASL3_MOUSE|Q8C2K5_S189	0.210893	0.21355	0.211515	0.212534	0.21138	0.210282	0.213472	0.214962	0.212387	0.209606	0.21039	0.207687	0.209356	0.212319	0.216977	0.215829	0.217909	0.21796	0.216706	0.215208	0.215203	0.213873	0.214465	0.216341	0.214798	0.213091	0.2122	0.214067	0.213469	0.214437	0.212005	0.211353	0.210968	0.213499	0.213557	0.211765	0.211919	0.213229	0.215344	0.211981	0.212083	0.214053	0.214041	0.211652
3	RB3GP_MOUSE|Q80UJ7_S664	0.206708	0.210493	0.21042	0.21457	0.213121	0.21318	0.215392	0.213773	0.213326	0.214697	0.214827	0.210188	0.209223	0.212061	0.215402	0.215967	0.213446	0.212512	0.216325	0.215857	0.214641	0.213988	0.213576	0.214681	0.214413	0.212557	0.212687	0.212088	0.212881	0.212983	0.212344	0.21316	0.212982	0.213225	0.213761	0.214387	0.213518	0.214148	0.21222	0.212959	0.213023	0.213047	0.212938	0.212813
3	RB6I2_MOUSE|Q99MI1_S21	0.213029	0.212048	0.213346	0.216204	0.21403	0.214683	0.215607	0.211186	0.21265	0.213927	0.211356	0.212207	0.211948	0.212126	0.215536	0.214428	0.21448	0.214456	0.211858	0.211375	0.21219	0.211629	0.213351	0.211516	0.215516	0.213828	0.212148	0.214659	0.213333	0.21439	0.213674	0.214523	0.213592	0.214862	0.212321	0.214323	0.212089	0.213448	0.212574	0.212363	0.210959	0.212505	0.211441	0.21293
3	RBM14_MOUSE|Q8C2Q3_S520	0.207699	0.203709	0.203099	0.214118	0.216945	0.218551	0.217562	0.212585	0.206913	0.215822	0.218848	0.216489	0.214698	0.203756	0.214391	0.21665	0.21516	0.215713	0.215016	0.214914	0.211402	0.215196	0.214861	0.2122	0.215744	0.213954	0.215006	0.213305	0.215154	0.213045	0.214696	0.213114	0.214264	0.211985	0.211354	0.213381	0.211612	0.212281	0.212794	0.211645	0.212504	0.211672	0.213917	0.211842
3	RBM25_MOUSE|B2RY56_S698	0.211223	0.211113	0.21282	0.212725	0.212587	0.21482	0.21512	0.212943	0.211687	0.214115	0.212343	0.212451	0.21355	0.212198	0.214856	0.215826	0.214025	0.213719	0.214741	0.21294	0.212826	0.211701	0.212606	0.211111	0.214862	0.214636	0.214835	0.214522	0.214759	0.213888	0.214015	0.21458	0.213595	0.210673	0.213035	0.212346	0.21343	0.212197	0.212348	0.212354	0.213475	0.211466	0.212943	0.212664
3	RBM3_MOUSE|O89086_Y126	0.218006	0.201737	0.20776	0.218294	0.222605	0.216696	0.210992	0.188003	0.20938	0.211976	0.212782	0.223191	0.214419	0.20411	0.214927	0.215713	0.2206	0.215201	0.213467	0.208997	0.219599	0.21889	0.210568	0.207573	0.210342	0.216101	0.216997	0.21539	0.214116	0.214415	0.214758	0.213789	0.21405	0.209521	0.213495	0.21128	0.212586	0.212533	0.214613	0.212853	0.214163	0.211518	0.214155	0.215341
3	RBM4B_MOUSE|Q8VE92_S86	0.213634	0.209652	0.207182	0.218414	0.214267	0.217888	0.213904	0.215732	0.20977	0.216271	0.212557	0.209682	0.210171	0.212301	0.215932	0.216469	0.217791	0.210879	0.211281	0.211112	0.212667	0.212383	0.214526	0.211309	0.216427	0.213591	0.213939	0.215185	0.212978	0.214353	0.211664	0.215656	0.213469	0.21259	0.211103	0.213911	0.212541	0.214351	0.211699	0.211696	0.211025	0.212807	0.212888	0.212597
3	RBM8A_MOUSE|Q9CWZ3_S42	0.206462	0.205875	0.210408	0.218152	0.222437	0.213739	0.214787	0.216861	0.219447	0.214277	0.213357	0.20142	0.206009	0.209762	0.213904	0.21494	0.217597	0.217377	0.209877	0.212875	0.214697	0.214906	0.213304	0.212592	0.216886	0.2146	0.213892	0.210931	0.212433	0.212836	0.213203	0.212345	0.214127	0.212439	0.211059	0.213291	0.211197	0.214336	0.214077	0.212819	0.213475	0.211906	0.214422	0.214152
3	RBP10_MOUSE|Q6VN19_S369	0.206042	0.206087	0.207851	0.213565	0.216734	0.214782	0.214054	0.212651	0.214198	0.214726	0.215144	0.209645	0.210399	0.21208	0.215358	0.216556	0.21537	0.214885	0.215764	0.21532	0.213741	0.214963	0.213263	0.207057	0.214505	0.211593	0.213912	0.214512	0.213681	0.212889	0.212465	0.213194	0.212486	0.21146	0.216666	0.214585	0.213109	0.213448	0.21284	0.213528	0.211855	0.215545	0.213547	0.214109
3	RBP10_MOUSE|Q6VN19_S490	0.20888	0.212029	0.2117	0.213425	0.21352	0.208989	0.209498	0.21109	0.210553	0.214193	0.211967	0.212889	0.206948	0.212957	0.218053	0.219091	0.213691	0.217746	0.214259	0.213865	0.217354	0.217201	0.213263	0.207057	0.214505	0.211593	0.213912	0.214512	0.213681	0.212889	0.212465	0.213194	0.212486	0.21146	0.216666	0.214585	0.213109	0.213448	0.21284	0.213528	0.211855	0.215545	0.213547	0.214109
3	RENBP_MOUSE|P82343_S429	0.205246	0.209213	0.20653	0.211308	0.217752	0.211317	0.212504	0.210157	0.214129	0.215154	0.215122	0.215109	0.210361	0.212696	0.215908	0.219046	0.213533	0.215572	0.211614	0.216192	0.214026	0.217324	0.212935	0.21105	0.211566	0.214362	0.21433	0.214079	0.215068	0.212435	0.214484	0.214586	0.213748	0.212518	0.212085	0.21372	0.213954	0.212555	0.212022	0.214851	0.212253	0.213523	0.211521	0.212702
3	REPS1_MOUSE|O54916_S482	0.206922	0.202743	0.203661	0.207348	0.229062	0.219985	0.214145	0.204421	0.21206	0.210921	0.213319	0.222965	0.211643	0.206915	0.21856	0.218889	0.216637	0.222066	0.205828	0.210213	0.208256	0.221282	0.213184	0.208869	0.215022	0.214446	0.214239	0.214128	0.213027	0.213548	0.213542	0.213523	0.213984	0.212705	0.210658	0.214729	0.212509	0.213604	0.21406	0.211515	0.212805	0.211733	0.21464	0.21384
3	REQU_MOUSE|Q61103_S391	0.209869	0.206847	0.211825	0.216238	0.215305	0.213413	0.214515	0.216606	0.217564	0.214985	0.214004	0.207295	0.208064	0.212963	0.213151	0.213903	0.215843	0.215073	0.212713	0.212404	0.215582	0.211823	0.213169	0.209693	0.212585	0.214098	0.213109	0.213196	0.21231	0.214267	0.214635	0.214799	0.212972	0.212148	0.212531	0.213249	0.21324	0.21304	0.213677	0.21473	0.213454	0.211455	0.213766	0.214224
3	RFTN1_MOUSE|Q6A0D4_S183	0.211153	0.210502	0.208907	0.215067	0.215423	0.214987	0.213066	0.209932	0.209398	0.20833	0.208178	0.210812	0.214126	0.213138	0.215913	0.219088	0.220027	0.218291	0.21362	0.213008	0.213825	0.213069	0.212773	0.215877	0.214482	0.213391	0.215259	0.21256	0.211789	0.213654	0.21298	0.211855	0.211411	0.212808	0.211472	0.212715	0.211829	0.213191	0.214126	0.214101	0.212284	0.214026	0.214947	0.212811
3	RFX5_MOUSE|Q9JL61_S535	0.212867	0.214949	0.211512	0.212586	0.212861	0.214378	0.210986	0.213755	0.212571	0.212421	0.214607	0.212637	0.211942	0.214053	0.211964	0.217698	0.215505	0.214413	0.214322	0.212149	0.210568	0.211531	0.213899	0.21368	0.220681	0.207305	0.215684	0.212168	0.214396	0.211588	0.217561	0.212523	0.215946	0.206147	0.207578	0.213099	0.211743	0.215407	0.21061	0.214063	0.216653	0.214807	0.212687	0.211621
3	RGPA2_MOUSE|A3KGS3_S818	0.205845	0.214435	0.216134	0.213678	0.21404	0.21372	0.213093	0.207115	0.202297	0.212183	0.211241	0.212833	0.20427	0.216146	0.221369	0.225744	0.213442	0.21453	0.21566	0.215776	0.212873	0.212694	0.211708	0.212886	0.215571	0.213072	0.208876	0.211795	0.21185	0.213211	0.209559	0.211296	0.211405	0.213968	0.214564	0.214449	0.214312	0.215001	0.214803	0.214673	0.215335	0.215013	0.213483	0.213416
3	RHG17_MOUSE|Q3UIA2_T730	0.213453	0.205303	0.208969	0.212174	0.217429	0.215371	0.21811	0.211911	0.212068	0.212772	0.212702	0.210795	0.2134	0.209465	0.214213	0.214792	0.216731	0.216255	0.214841	0.212136	0.213363	0.21374	0.213513	0.210427	0.21084	0.214205	0.2153	0.21288	0.212378	0.21342	0.214307	0.212303	0.210977	0.214566	0.21242	0.215493	0.211716	0.213376	0.21538	0.214895	0.210618	0.212494	0.214517	0.214265
3	RHG22_MOUSE|Q8BL80_S22	0.207419	0.210954	0.212604	0.215189	0.216181	0.218111	0.216346	0.214877	0.213317	0.21413	0.215416	0.207544	0.210485	0.213818	0.211266	0.217273	0.213916	0.210957	0.212931	0.217432	0.209635	0.210145	0.212145	0.210261	0.216225	0.213033	0.212002	0.212478	0.213242	0.213629	0.21297	0.213052	0.213812	0.213561	0.212923	0.215015	0.213023	0.214035	0.212817	0.213218	0.212301	0.213901	0.212988	0.213718
3	RHG25_MOUSE|Q8BYW1_S363	0.205112	0.205297	0.205901	0.215206	0.214536	0.213637	0.214606	0.217151	0.217852	0.217556	0.218254	0.20706	0.205698	0.209541	0.213539	0.214967	0.214889	0.212072	0.215309	0.218162	0.217093	0.21595	0.214311	0.210446	0.217143	0.215892	0.214622	0.214483	0.216856	0.213608	0.213748	0.214504	0.215971	0.211393	0.21283	0.21463	0.210999	0.212999	0.211703	0.209245	0.210947	0.211579	0.211996	0.210264
3	RHG31_MOUSE|A6X8Z5_S1055	0.210942	0.208817	0.209245	0.212737	0.213213	0.211843	0.214002	0.212649	0.215094	0.214099	0.213891	0.210334	0.205286	0.213819	0.214452	0.215358	0.21623	0.212376	0.216159	0.216798	0.216615	0.216041	0.211489	0.210338	0.213422	0.21109	0.213377	0.210373	0.20987	0.2143	0.217137	0.213764	0.214527	0.213785	0.213398	0.215467	0.211886	0.21186	0.213299	0.21232	0.211893	0.214884	0.215231	0.216511
3	RHG31_MOUSE|A6X8Z5_S829	0.210892	0.210951	0.208614	0.214449	0.214911	0.210645	0.210674	0.21669	0.217885	0.215454	0.211847	0.207088	0.208946	0.214608	0.213174	0.215915	0.216686	0.214419	0.213502	0.211711	0.215747	0.215183	0.211489	0.210338	0.213422	0.21109	0.213377	0.210373	0.20987	0.2143	0.217137	0.213764	0.214527	0.213785	0.213398	0.215467	0.211886	0.21186	0.213299	0.21232	0.211893	0.214884	0.215231	0.216511
3	RHG31_MOUSE|A6X8Z5_S850	0.205822	0.207853	0.209486	0.214103	0.214579	0.214899	0.215126	0.213979	0.214029	0.216592	0.217297	0.209103	0.208475	0.2103	0.216438	0.216182	0.213368	0.212468	0.217096	0.214635	0.21471	0.213354	0.211489	0.210338	0.213422	0.21109	0.213377	0.210373	0.20987	0.2143	0.217137	0.213764	0.214527	0.213785	0.213398	0.215467	0.211886	0.21186	0.213299	0.21232	0.211893	0.214884	0.215231	0.216511
3	RHG31_MOUSE|A6X8Z5_S941	0.207394	0.210438	0.210775	0.211946	0.206311	0.214645	0.213693	0.214576	0.207394	0.21694	0.216763	0.219501	0.209169	0.210706	0.215504	0.224812	0.212117	0.211997	0.209494	0.217829	0.212792	0.214671	0.211489	0.210338	0.213422	0.21109	0.213377	0.210373	0.20987	0.2143	0.217137	0.213764	0.214527	0.213785	0.213398	0.215467	0.211886	0.21186	0.213299	0.21232	0.211893	0.214884	0.215231	0.216511
3	RHG39_MOUSE|P59281_S683	0.207039	0.212755	0.211976	0.212309	0.21602	0.213897	0.214751	0.209109	0.213612	0.21116	0.208899	0.212894	0.205991	0.216408	0.216592	0.215651	0.215056	0.216027	0.217374	0.215382	0.213965	0.213066	0.215016	0.212433	0.21787	0.21258	0.212449	0.211284	0.213082	0.212684	0.214277	0.210613	0.212809	0.21497	0.213456	0.215624	0.212635	0.214887	0.213319	0.214196	0.210906	0.209053	0.212488	0.213608
3	RHGBA_MOUSE|Q80Y19_S303	0.205984	0.214003	0.211584	0.216593	0.218915	0.220554	0.21714	0.214809	0.213614	0.21334	0.212637	0.210044	0.207839	0.212833	0.2128	0.217257	0.213213	0.216176	0.211003	0.21412	0.207643	0.207598	0.21644	0.222969	0.218685	0.215464	0.213571	0.216618	0.210803	0.217241	0.213443	0.214977	0.212694	0.214275	0.211192	0.21057	0.209419	0.207802	0.207867	0.210236	0.211001	0.211278	0.211207	0.211996
3	RHGBA_MOUSE|Q80Y19_S758	0.208735	0.217888	0.213963	0.212078	0.21424	0.219783	0.213291	0.212982	0.213201	0.214442	0.213113	0.210767	0.20425	0.211489	0.213407	0.215831	0.211539	0.213237	0.216646	0.217937	0.210673	0.210367	0.21644	0.222969	0.218685	0.215464	0.213571	0.216618	0.210803	0.217241	0.213443	0.214977	0.212694	0.214275	0.211192	0.21057	0.209419	0.207802	0.207867	0.210236	0.211001	0.211278	0.211207	0.211996
3	RIC1_MOUSE|Q69ZJ7_S1016	0.199742	0.211606	0.208867	0.214646	0.216706	0.213876	0.212629	0.212935	0.21452	0.212181	0.213827	0.204151	0.20922	0.211716	0.216572	0.219119	0.21623	0.214546	0.217331	0.219922	0.214289	0.214743	0.212068	0.215786	0.215922	0.211653	0.211411	0.212451	0.210494	0.213364	0.214144	0.210365	0.211987	0.213814	0.212564	0.212855	0.213789	0.214826	0.212775	0.214334	0.213097	0.212739	0.214911	0.214947
3	RICTR_MOUSE|Q6QI06_S1155	0.200345	0.209214	0.204994	0.215224	0.214117	0.22232	0.215389	0.209722	0.211278	0.217953	0.210031	0.209854	0.210419	0.211797	0.219066	0.220438	0.211353	0.216923	0.22017	0.216595	0.209166	0.212663	0.211542	0.213891	0.21484	0.214409	0.215136	0.213363	0.213759	0.215172	0.213864	0.212668	0.214376	0.208863	0.208347	0.213727	0.213416	0.212006	0.212937	0.212719	0.214392	0.214736	0.213681	0.212416
3	RIF1_MOUSE|Q6PR54_S1407	0.207372	0.220091	0.212403	0.214075	0.21903	0.214777	0.214294	0.215262	0.212323	0.213728	0.211339	0.204254	0.204616	0.212275	0.214679	0.217181	0.216369	0.208857	0.21567	0.216439	0.213338	0.21122	0.21504	0.223596	0.219857	0.212362	0.212561	0.216046	0.209245	0.214909	0.211576	0.212071	0.209643	0.213604	0.213742	0.207093	0.211439	0.211307	0.212169	0.2136	0.213082	0.212235	0.213077	0.211577
3	RIN2_MOUSE|Q9D684_S366	0.206064	0.203844	0.214097	0.208561	0.212563	0.214186	0.214362	0.210958	0.214754	0.214464	0.216575	0.211231	0.210896	0.210655	0.215015	0.218109	0.214965	0.215108	0.217041	0.218085	0.212185	0.216037	0.210688	0.21041	0.215172	0.212088	0.21357	0.210466	0.212124	0.212745	0.216431	0.213523	0.212778	0.212087	0.214025	0.213627	0.212602	0.211987	0.212605	0.21404	0.21396	0.214384	0.215124	0.215845
3	RIPK1_MOUSE|Q60855_S313	0.20989	0.208518	0.214549	0.215891	0.214933	0.215951	0.219041	0.211837	0.211305	0.21425	0.213073	0.209494	0.211723	0.212732	0.215037	0.216176	0.214705	0.214721	0.214007	0.213318	0.210493	0.208405	0.2127	0.213436	0.213932	0.213109	0.215023	0.212573	0.212309	0.212532	0.21402	0.212615	0.212307	0.213133	0.214132	0.215254	0.213536	0.213402	0.213673	0.213737	0.211163	0.212535	0.212904	0.212344
3	RIPK1_MOUSE|Q60855_S321	0.199655	0.207609	0.203188	0.217424	0.219595	0.219254	0.217721	0.214087	0.216235	0.213501	0.214615	0.203954	0.207754	0.218151	0.213602	0.219622	0.214924	0.211409	0.214928	0.219828	0.210872	0.210875	0.2127	0.213436	0.213932	0.213109	0.215023	0.212573	0.212309	0.212532	0.21402	0.212615	0.212307	0.213133	0.214132	0.215254	0.213536	0.213402	0.213673	0.213737	0.211163	0.212535	0.212904	0.212344
3	RIPK3_MOUSE|Q9QZL0_S380	0.210711	0.213738	0.213855	0.214858	0.220082	0.215192	0.214525	0.208586	0.213075	0.213028	0.214041	0.206477	0.210784	0.21409	0.215872	0.217215	0.21276	0.212749	0.214032	0.211781	0.211404	0.211162	0.214062	0.212326	0.215901	0.21409	0.216599	0.213002	0.213951	0.213422	0.215629	0.212359	0.213179	0.211943	0.212731	0.213916	0.211018	0.211499	0.213592	0.212578	0.211468	0.211108	0.213023	0.212912
3	RL24_MOUSE|Q8BP67_T83	0.20325	0.206188	0.205572	0.21364	0.209467	0.217553	0.210855	0.213861	0.206602	0.213434	0.211633	0.216251	0.216697	0.210577	0.210785	0.218579	0.219129	0.210538	0.221415	0.219591	0.21901	0.214522	0.213751	0.218271	0.214596	0.21305	0.211292	0.213971	0.211068	0.214679	0.210679	0.212073	0.213138	0.214674	0.21457	0.209199	0.212836	0.211951	0.213827	0.213282	0.214145	0.213486	0.21272	0.212994
3	RMD3_MOUSE|Q3UJU9_S46	0.212817	0.210273	0.212291	0.215036	0.21594	0.213132	0.214061	0.212847	0.213943	0.211084	0.212041	0.208147	0.211307	0.212299	0.213437	0.214077	0.215242	0.218291	0.214788	0.212265	0.214486	0.212389	0.213748	0.214892	0.217375	0.211808	0.21201	0.212568	0.212139	0.214423	0.210389	0.211449	0.21066	0.213758	0.215848	0.21337	0.211772	0.212879	0.214357	0.212575	0.213624	0.214115	0.214593	0.211923
3	RN169_MOUSE|E9Q7F2_S326	0.213879	0.214929	0.204094	0.21654	0.221635	0.223043	0.216782	0.214577	0.215147	0.213565	0.209995	0.207321	0.207858	0.205999	0.213227	0.217829	0.220472	0.214195	0.209078	0.209363	0.211033	0.208581	0.215325	0.218938	0.223674	0.215457	0.21384	0.215358	0.213261	0.214212	0.205951	0.211641	0.209271	0.215739	0.215353	0.215937	0.210622	0.209956	0.211223	0.212237	0.212988	0.211236	0.208151	0.209309
3	RN169_MOUSE|E9Q7F2_S630	0.211186	0.21372	0.21002	0.213784	0.216427	0.214519	0.213605	0.215164	0.217773	0.216807	0.214713	0.208615	0.203579	0.20828	0.211514	0.213754	0.214607	0.212616	0.215967	0.213963	0.215179	0.214101	0.215325	0.218938	0.223674	0.215457	0.21384	0.215358	0.213261	0.214212	0.205951	0.211641	0.209271	0.215739	0.215353	0.215937	0.210622	0.209956	0.211223	0.212237	0.212988	0.211236	0.208151	0.209309
3	ROA1_MOUSE|P49312_S199	0.203954	0.206945	0.206522	0.219857	0.21462	0.218288	0.216679	0.217494	0.214978	0.21612	0.21356	0.204305	0.205911	0.212631	0.214895	0.216698	0.21637	0.214548	0.216072	0.215568	0.20966	0.213638	0.214811	0.21514	0.211185	0.214197	0.213906	0.213442	0.213582	0.213429	0.215543	0.212213	0.214513	0.21193	0.211805	0.213897	0.211809	0.213979	0.212836	0.211719	0.212645	0.211425	0.212872	0.21346
3	ROA2_MOUSE|O88569_Y174	0.208708	0.221007	0.202748	0.214166	0.212689	0.216772	0.204935	0.213085	0.213644	0.207207	0.206791	0.211389	0.212941	0.21449	0.216835	0.218957	0.218841	0.218318	0.213034	0.214312	0.213174	0.215283	0.214891	0.210337	0.214905	0.216621	0.213894	0.2126	0.214453	0.2151	0.214117	0.212722	0.213899	0.211941	0.211306	0.213183	0.212187	0.211604	0.213176	0.214718	0.210684	0.210993	0.212307	0.21464
3	ROAA_MOUSE|Q99020_S260	0.215489	0.206448	0.204916	0.219601	0.209018	0.208267	0.210114	0.22253	0.207395	0.212507	0.209962	0.210608	0.201992	0.213197	0.213329	0.218691	0.218602	0.220062	0.207938	0.21629	0.221259	0.220471	0.21509	0.210142	0.214944	0.214956	0.213108	0.2157	0.214345	0.215936	0.213973	0.214483	0.213399	0.213524	0.212883	0.213193	0.211756	0.211789	0.212328	0.212494	0.210255	0.210839	0.213216	0.211928
3	RPB1_MOUSE|P08775_S1878	0.212092	0.212856	0.21379	0.212888	0.212767	0.213059	0.215325	0.209072	0.211127	0.214117	0.213995	0.212896	0.206983	0.21197	0.216272	0.217341	0.215937	0.213583	0.216117	0.214106	0.213545	0.210292	0.213471	0.214431	0.216691	0.215094	0.215355	0.214303	0.213806	0.213616	0.213897	0.213555	0.213709	0.211911	0.211446	0.212508	0.212671	0.211328	0.211969	0.212763	0.211933	0.211813	0.212008	0.212038
3	RPP30_MOUSE|O88796_S251	0.214111	0.213444	0.203993	0.211025	0.21386	0.215515	0.214324	0.21423	0.210873	0.213667	0.214472	0.209994	0.21221	0.209813	0.214512	0.220278	0.216108	0.213091	0.214379	0.213623	0.212618	0.21383	0.212727	0.21716	0.198595	0.215513	0.214772	0.214456	0.211884	0.214162	0.214081	0.21182	0.211649	0.214396	0.212059	0.216998	0.214502	0.213635	0.218056	0.205053	0.214215	0.211371	0.221377	0.210922
3	RREB1_MOUSE|Q3UH06_S1629	0.209227	0.218696	0.208549	0.216319	0.218914	0.213185	0.209991	0.215599	0.217531	0.209997	0.206751	0.205431	0.210531	0.21378	0.212842	0.214408	0.219012	0.216096	0.210762	0.214253	0.216035	0.211743	0.213676	0.215996	0.217284	0.213334	0.211348	0.213691	0.210018	0.212688	0.213287	0.210379	0.20821	0.213355	0.21282	0.213328	0.214073	0.2141	0.217314	0.21531	0.210696	0.213478	0.21383	0.211958
3	RRP1B_MOUSE|Q91YK2_S528	0.211301	0.214416	0.209795	0.218645	0.219898	0.218269	0.215693	0.211394	0.208978	0.210249	0.207851	0.206523	0.207291	0.21105	0.217019	0.223008	0.221168	0.221579	0.210679	0.208519	0.208332	0.20736	0.215104	0.217495	0.216606	0.214326	0.21454	0.214999	0.213446	0.214205	0.212355	0.215189	0.212429	0.211698	0.212465	0.210033	0.212734	0.212418	0.212024	0.213206	0.21113	0.212071	0.211797	0.209961
3	RRP1B_MOUSE|Q91YK2_S698	0.214688	0.215871	0.211146	0.213498	0.216147	0.217319	0.214912	0.213178	0.20422	0.210544	0.208886	0.21307	0.21229	0.210191	0.214551	0.222718	0.21923	0.218011	0.215885	0.205042	0.209578	0.208457	0.215104	0.217495	0.216606	0.214326	0.21454	0.214999	0.213446	0.214205	0.212355	0.215189	0.212429	0.211698	0.212465	0.210033	0.212734	0.212418	0.212024	0.213206	0.21113	0.212071	0.211797	0.209961
3	RRP5_MOUSE|Q6NS46_S1468	0.208335	0.208178	0.216019	0.212394	0.212949	0.221945	0.218291	0.214627	0.212332	0.217132	0.216987	0.211267	0.212332	0.20056	0.21396	0.213867	0.211333	0.212236	0.215845	0.215016	0.212204	0.211727	0.213406	0.222408	0.216052	0.212904	0.212357	0.214674	0.209414	0.214422	0.210602	0.212239	0.210328	0.212406	0.213215	0.206983	0.2141	0.210913	0.214299	0.214405	0.214622	0.214629	0.213971	0.211638
3	RS20_MOUSE|P60867_T9	0.212371	0.209082	0.205093	0.211311	0.210731	0.21523	0.214044	0.21404	0.212186	0.216564	0.219195	0.212595	0.21131	0.205947	0.21422	0.216461	0.214498	0.21353	0.218189	0.214613	0.214565	0.214063	0.214208	0.213957	0.212116	0.212971	0.212679	0.212842	0.213214	0.212663	0.21304	0.21233	0.212892	0.213114	0.211734	0.213223	0.213232	0.213655	0.213967	0.214453	0.212862	0.214845	0.212827	0.213563
3	RSRC2_MOUSE|A2RTL5_S45	0.213761	0.205147	0.209201	0.217462	0.213135	0.22042	0.220224	0.215762	0.203567	0.213913	0.21264	0.215067	0.20849	0.207749	0.217222	0.226086	0.218748	0.218273	0.200542	0.212833	0.208433	0.20989	0.213394	0.209869	0.218207	0.214873	0.214034	0.214282	0.213188	0.214789	0.213544	0.212289	0.210765	0.213826	0.211983	0.214932	0.212162	0.212057	0.21506	0.213146	0.21158	0.209765	0.213823	0.212672
3	RTN4_MOUSE|Q99P72_T430	0.206675	0.216138	0.211176	0.21626	0.222662	0.218177	0.215052	0.211555	0.213434	0.212039	0.211768	0.203677	0.206178	0.209143	0.215126	0.222017	0.217528	0.216113	0.211484	0.21308	0.209034	0.210977	0.21307	0.221265	0.218745	0.211618	0.212945	0.212454	0.209691	0.213263	0.212678	0.210782	0.210936	0.214826	0.214355	0.210237	0.211047	0.212021	0.212241	0.213475	0.213291	0.213731	0.213704	0.213704
3	RUFY1_MOUSE|Q8BIJ7_S52	0.212107	0.209922	0.209916	0.216578	0.218795	0.215075	0.214759	0.213261	0.214342	0.2123	0.213413	0.206408	0.208149	0.211113	0.215022	0.216645	0.218671	0.217611	0.212825	0.209919	0.210629	0.212411	0.214156	0.211667	0.217407	0.213375	0.214347	0.213846	0.215245	0.213095	0.21401	0.21425	0.213997	0.213642	0.210839	0.213326	0.212735	0.212734	0.211184	0.213288	0.21136	0.211572	0.211181	0.213042
3	S11IP_MOUSE|Q3TAA7_S763	0.204034	0.212863	0.203662	0.212369	0.209847	0.211476	0.210735	0.219234	0.217588	0.222626	0.219077	0.20659	0.211139	0.21108	0.214494	0.212271	0.208625	0.206928	0.221167	0.219481	0.215003	0.218661	0.212901	0.214708	0.214702	0.214044	0.215442	0.213343	0.213302	0.213195	0.214427	0.213518	0.21405	0.211635	0.21139	0.212304	0.211111	0.21256	0.211144	0.214446	0.212849	0.213959	0.211688	0.213622
3	S15A4_MOUSE|Q91W98_S17	0.205528	0.21325	0.210036	0.215046	0.216761	0.214883	0.213958	0.211518	0.215471	0.211434	0.21139	0.208827	0.212938	0.206717	0.21326	0.216717	0.218362	0.217014	0.214934	0.215393	0.212522	0.213924	0.216369	0.221128	0.220514	0.212467	0.213542	0.211932	0.208921	0.209818	0.211853	0.209733	0.209986	0.215748	0.213674	0.211766	0.211617	0.212567	0.213903	0.215226	0.209831	0.214053	0.212707	0.212564
3	S23IP_MOUSE|Q6NZC7_S735	0.209837	0.212406	0.209458	0.214964	0.214694	0.212717	0.21188	0.215605	0.216397	0.215954	0.215046	0.206234	0.20604	0.208993	0.213062	0.214524	0.215787	0.211994	0.216725	0.215154	0.217017	0.215403	0.212338	0.210805	0.214181	0.213275	0.212596	0.211207	0.212798	0.212608	0.213184	0.211359	0.212479	0.213097	0.212884	0.214567	0.213916	0.213601	0.215299	0.214576	0.213238	0.21379	0.214255	0.214298
3	S26A2_MOUSE|Q62273_S12	0.203149	0.211971	0.207694	0.214634	0.216585	0.215132	0.214596	0.213162	0.216406	0.212988	0.213329	0.207751	0.211041	0.209512	0.215107	0.215752	0.214169	0.216393	0.217153	0.215842	0.214179	0.213271	0.212623	0.226378	0.224995	0.210985	0.211898	0.207678	0.205501	0.21357	0.209514	0.213554	0.210257	0.213287	0.21211	0.218096	0.213114	0.214202	0.20774	0.209238	0.213322	0.21354	0.21578	0.211833
3	S4A7_MOUSE|Q8BTY2_S1033	0.206732	0.205568	0.213255	0.212968	0.211666	0.21457	0.215912	0.213475	0.214839	0.217295	0.217206	0.211976	0.213303	0.208437	0.213595	0.211456	0.211594	0.214201	0.219095	0.215857	0.211063	0.215812	0.209804	0.216521	0.214608	0.212219	0.211855	0.212552	0.210388	0.214276	0.21147	0.213224	0.21213	0.213454	0.213588	0.21156	0.214215	0.213955	0.21249	0.214624	0.216072	0.213722	0.213962	0.213593
3	SAC2_MOUSE|Q8CDA1_S827	0.212984	0.210661	0.211353	0.211986	0.216838	0.217201	0.216631	0.210573	0.213453	0.214982	0.213947	0.209397	0.214228	0.212431	0.212412	0.21593	0.213507	0.213328	0.213459	0.215249	0.208967	0.210626	0.211604	0.212153	0.215708	0.213542	0.214032	0.212494	0.21389	0.213232	0.214548	0.212909	0.213456	0.212662	0.211979	0.214642	0.213811	0.210915	0.212823	0.214477	0.213469	0.213517	0.212564	0.211923
3	SAFB1_MOUSE|D3YXK2_S626	0.211269	0.212884	0.212866	0.218977	0.219474	0.213703	0.213627	0.215123	0.215547	0.211228	0.20932	0.208172	0.213078	0.21527	0.211284	0.215686	0.216049	0.215507	0.206986	0.209469	0.212657	0.211741	0.213744	0.2112	0.21302	0.214408	0.214881	0.213234	0.214075	0.213763	0.214017	0.213791	0.212232	0.213629	0.212647	0.213831	0.212834	0.212315	0.214572	0.213324	0.211084	0.211672	0.212667	0.213423
3	SASH3_MOUSE|Q8K352_S38	0.205649	0.206264	0.211216	0.214656	0.215672	0.213513	0.211466	0.21058	0.210954	0.209487	0.207819	0.208673	0.207284	0.21545	0.219085	0.219874	0.222157	0.220055	0.21493	0.215335	0.217384	0.211814	0.213321	0.207131	0.214055	0.214522	0.211695	0.213349	0.21143	0.216474	0.216531	0.212727	0.211237	0.213003	0.212642	0.216464	0.210392	0.211596	0.21649	0.214459	0.212261	0.211934	0.215139	0.213302
3	SCRIB_MOUSE|Q80U72_S1218	0.209578	0.211886	0.20197	0.214024	0.209783	0.208761	0.212042	0.214901	0.217786	0.212216	0.214147	0.206451	0.205503	0.214293	0.216165	0.212182	0.217131	0.21234	0.222363	0.217627	0.222018	0.216027	0.216376	0.214047	0.216314	0.21526	0.215475	0.214435	0.213344	0.213563	0.213247	0.214344	0.212285	0.213032	0.211402	0.215686	0.211522	0.210093	0.210385	0.211613	0.210806	0.211889	0.212361	0.212763
3	SCRIB_MOUSE|Q80U72_S1457	0.209802	0.211868	0.211273	0.217389	0.217068	0.216162	0.216333	0.21624	0.219526	0.216899	0.217804	0.204741	0.210039	0.209143	0.212819	0.210944	0.209613	0.211193	0.212991	0.212708	0.211351	0.213861	0.216376	0.214047	0.216314	0.21526	0.215475	0.214435	0.213344	0.213563	0.213247	0.214344	0.212285	0.213032	0.211402	0.215686	0.211522	0.210093	0.210385	0.211613	0.210806	0.211889	0.212361	0.212763
3	SCRIB_MOUSE|Q80U72_S821	0.207682	0.208381	0.215096	0.215442	0.220506	0.222883	0.219738	0.21047	0.210529	0.217691	0.217966	0.209684	0.210053	0.20657	0.215266	0.219267	0.210584	0.212686	0.212918	0.210274	0.205062	0.210478	0.216376	0.214047	0.216314	0.21526	0.215475	0.214435	0.213344	0.213563	0.213247	0.214344	0.212285	0.213032	0.211402	0.215686	0.211522	0.210093	0.210385	0.211613	0.210806	0.211889	0.212361	0.212763
3	SESQ1_MOUSE|Q8BH49_S134	0.208192	0.205724	0.205639	0.212023	0.213776	0.210836	0.213564	0.215439	0.215252	0.213939	0.21734	0.210372	0.210005	0.212487	0.212752	0.214051	0.214098	0.213371	0.218957	0.216243	0.217637	0.218063	0.212256	0.215249	0.208193	0.214774	0.213958	0.212975	0.209212	0.216947	0.213274	0.216448	0.2106	0.210947	0.215868	0.215765	0.214203	0.209486	0.21493	0.210695	0.213868	0.213317	0.212703	0.214454
3	SETD2_MOUSE|E9Q5F9_S753	0.212457	0.215008	0.208831	0.216256	0.215175	0.21313	0.212246	0.212416	0.213559	0.211837	0.211099	0.210107	0.210239	0.214402	0.213261	0.216667	0.216164	0.215207	0.213794	0.211872	0.214415	0.212055	0.214331	0.211782	0.215058	0.213607	0.215208	0.213876	0.213136	0.213922	0.215409	0.214301	0.213908	0.212212	0.211194	0.213698	0.210758	0.210952	0.211844	0.21289	0.212719	0.21292	0.212686	0.213917
3	SETD2_MOUSE|E9Q5F9_S890	0.21296	0.212757	0.204596	0.214117	0.219236	0.217891	0.21524	0.213036	0.215276	0.218348	0.213392	0.20926	0.207293	0.208344	0.214174	0.214911	0.212073	0.212446	0.213946	0.21205	0.213677	0.2148	0.214331	0.211782	0.215058	0.213607	0.215208	0.213876	0.213136	0.213922	0.215409	0.214301	0.213908	0.212212	0.211194	0.213698	0.210758	0.210952	0.211844	0.21289	0.212719	0.21292	0.212686	0.213917
3	SFR19_MOUSE|Q5U4C3_S510	0.212519	0.20853	0.207493	0.213588	0.219023	0.21798	0.216862	0.211294	0.211972	0.212289	0.212624	0.210656	0.210336	0.207933	0.216122	0.217103	0.218007	0.215649	0.213558	0.210179	0.214255	0.211883	0.214621	0.211587	0.214659	0.213927	0.215155	0.213975	0.211918	0.214285	0.2118	0.212265	0.211726	0.21528	0.213466	0.21503	0.211122	0.213288	0.213818	0.214279	0.210497	0.211118	0.213782	0.212712
3	SFR19_MOUSE|Q5U4C3_S682	0.209679	0.21207	0.209239	0.212942	0.209745	0.209891	0.211376	0.213058	0.207705	0.211614	0.211246	0.208971	0.207154	0.210157	0.220054	0.216387	0.216643	0.215419	0.224214	0.213743	0.222104	0.215976	0.214621	0.211587	0.214659	0.213927	0.215155	0.213975	0.211918	0.214285	0.2118	0.212265	0.211726	0.21528	0.213466	0.21503	0.211122	0.213288	0.213818	0.214279	0.210497	0.211118	0.213782	0.212712
3	SFR19_MOUSE|Q5U4C3_T328	0.211971	0.211196	0.20556	0.212387	0.213919	0.218973	0.216993	0.208911	0.214147	0.216576	0.218204	0.212285	0.216616	0.209183	0.215431	0.210481	0.21078	0.205172	0.220462	0.213718	0.215934	0.210702	0.214621	0.211587	0.214659	0.213927	0.215155	0.213975	0.211918	0.214285	0.2118	0.212265	0.211726	0.21528	0.213466	0.21503	0.211122	0.213288	0.213818	0.214279	0.210497	0.211118	0.213782	0.212712
3	SHIP1_MOUSE|Q9ES52_S246	0.209083	0.210542	0.21239	0.210799	0.215718	0.211717	0.212699	0.213138	0.216331	0.214057	0.213523	0.209232	0.21231	0.212061	0.211574	0.216215	0.213877	0.215534	0.215499	0.215155	0.214598	0.214136	0.213828	0.214743	0.215795	0.213079	0.215847	0.212862	0.213051	0.213182	0.215551	0.214164	0.213955	0.211052	0.211634	0.212442	0.211723	0.211904	0.212018	0.211758	0.21193	0.213349	0.213461	0.212992
3	SHIP1_MOUSE|Q9ES52_T964_S972	0.209773	0.21268	0.206453	0.211278	0.216771	0.211685	0.214975	0.211284	0.214276	0.207169	0.211512	0.207619	0.211626	0.213236	0.216026	0.214956	0.217597	0.21523	0.217828	0.216076	0.217245	0.214558	0.213828	0.214743	0.215795	0.213079	0.215847	0.212862	0.213051	0.213182	0.215551	0.214164	0.213955	0.211052	0.211634	0.212442	0.211723	0.211904	0.212018	0.211758	0.21193	0.213349	0.213461	0.212992
3	SHIP2_MOUSE|Q6P549_S1166	0.208981	0.216455	0.209589	0.215675	0.217862	0.212217	0.213944	0.21167	0.217467	0.208206	0.211007	0.209383	0.20752	0.214622	0.21209	0.216391	0.217389	0.214586	0.211301	0.215583	0.214977	0.213002	0.212659	0.213262	0.214441	0.213821	0.213865	0.213042	0.213635	0.2124	0.213377	0.213251	0.213948	0.212893	0.213194	0.213559	0.212672	0.213655	0.211322	0.213278	0.213128	0.21291	0.212419	0.213665
3	SHOT1_MOUSE|Q8K2Q9_S494	0.21183	0.210943	0.213965	0.212867	0.215542	0.215442	0.213781	0.210877	0.211372	0.21369	0.213979	0.212191	0.213845	0.210423	0.216771	0.214175	0.212668	0.215419	0.214999	0.210602	0.21238	0.212499	0.212883	0.20918	0.214688	0.212333	0.213615	0.214163	0.215023	0.21299	0.212972	0.214324	0.214314	0.214598	0.212901	0.213757	0.213977	0.21409	0.211554	0.213986	0.211823	0.212083	0.210981	0.214081
3	SHOT1_MOUSE|Q8K2Q9_T537	0.211419	0.213753	0.21099	0.208241	0.211791	0.214311	0.215171	0.201987	0.214064	0.210709	0.209482	0.211278	0.211236	0.210935	0.219908	0.220848	0.218591	0.216382	0.215505	0.218603	0.210546	0.213764	0.212883	0.20918	0.214688	0.212333	0.213615	0.214163	0.215023	0.21299	0.212972	0.214324	0.214314	0.214598	0.212901	0.213757	0.213977	0.21409	0.211554	0.213986	0.211823	0.212083	0.210981	0.214081
3	SI1L2_MOUSE|Q80TE4_S1362	0.208842	0.204576	0.204898	0.213418	0.213333	0.216742	0.21552	0.214172	0.208923	0.217538	0.217975	0.215594	0.210512	0.209154	0.215705	0.221937	0.215726	0.212702	0.20932	0.215811	0.212876	0.214244	0.212175	0.213781	0.213616	0.213861	0.214242	0.214662	0.213479	0.212656	0.213249	0.212757	0.21262	0.212607	0.210353	0.21505	0.214231	0.213872	0.212017	0.212727	0.21345	0.212855	0.212671	0.213434
3	SI1L2_MOUSE|Q80TE4_S1478	0.209751	0.210095	0.203237	0.214315	0.210323	0.21618	0.21583	0.212184	0.212374	0.216996	0.214902	0.21373	0.216161	0.213163	0.215832	0.215029	0.211545	0.211595	0.216262	0.215465	0.212468	0.212493	0.212175	0.213781	0.213616	0.213861	0.214242	0.214662	0.213479	0.212656	0.213249	0.212757	0.21262	0.212607	0.210353	0.21505	0.214231	0.213872	0.212017	0.212727	0.21345	0.212855	0.212671	0.213434
3	SI1L2_MOUSE|Q80TE4_S1650	0.20933	0.208721	0.211619	0.21443	0.215763	0.218036	0.215959	0.210644	0.213305	0.2163	0.216371	0.207658	0.210371	0.209917	0.216441	0.218184	0.213317	0.212253	0.214011	0.214216	0.211028	0.212079	0.212175	0.213781	0.213616	0.213861	0.214242	0.214662	0.213479	0.212656	0.213249	0.212757	0.21262	0.212607	0.210353	0.21505	0.214231	0.213872	0.212017	0.212727	0.21345	0.212855	0.212671	0.213434
3	SIK3_MOUSE|Q6P4S6_S826	0.210301	0.210089	0.209468	0.212709	0.217623	0.216215	0.216342	0.209941	0.215121	0.216852	0.211297	0.210525	0.209585	0.210831	0.212423	0.219416	0.219866	0.212182	0.214794	0.212563	0.211536	0.210205	0.21473	0.211952	0.212663	0.215902	0.212711	0.213782	0.21318	0.213507	0.212707	0.21409	0.213253	0.212916	0.212258	0.21368	0.212214	0.212967	0.214016	0.212974	0.212387	0.212684	0.212731	0.213069
3	SIK3_MOUSE|Q6P4S6_S856	0.208686	0.208138	0.211895	0.21419	0.215458	0.218791	0.216098	0.215028	0.216169	0.21647	0.217146	0.210005	0.210373	0.209185	0.213002	0.216406	0.213215	0.211732	0.213467	0.21143	0.20911	0.213955	0.21473	0.211952	0.212663	0.215902	0.212711	0.213782	0.21318	0.213507	0.212707	0.21409	0.213253	0.212916	0.212258	0.21368	0.212214	0.212967	0.214016	0.212974	0.212387	0.212684	0.212731	0.213069
3	SIPA1_MOUSE|P46062_S51	0.21097	0.209788	0.207984	0.213899	0.216367	0.214696	0.216714	0.212919	0.214283	0.211903	0.214142	0.208287	0.209233	0.211254	0.215186	0.216693	0.217027	0.215092	0.214584	0.213233	0.212941	0.212863	0.213394	0.209991	0.215164	0.214117	0.214304	0.213566	0.214372	0.212347	0.21429	0.214451	0.214449	0.212694	0.212554	0.214815	0.213242	0.213004	0.213478	0.211818	0.212015	0.211903	0.211736	0.212633
3	SIPA1_MOUSE|P46062_S51_S65	0.208679	0.210066	0.213107	0.213279	0.216214	0.215298	0.214538	0.211184	0.21599	0.212866	0.214633	0.206881	0.209609	0.215855	0.215283	0.216442	0.215432	0.213884	0.214176	0.215531	0.211842	0.209243	0.213394	0.209991	0.215164	0.214117	0.214304	0.213566	0.214372	0.212347	0.21429	0.214451	0.214449	0.212694	0.212554	0.214815	0.213242	0.213004	0.213478	0.211818	0.212015	0.211903	0.211736	0.212633
3	SIPA1_MOUSE|P46062_S53	0.208229	0.20804	0.209225	0.214096	0.217894	0.214207	0.217158	0.213568	0.215567	0.21287	0.214872	0.206029	0.207336	0.212815	0.215564	0.216554	0.215882	0.216208	0.214562	0.214576	0.214082	0.210503	0.213394	0.209991	0.215164	0.214117	0.214304	0.213566	0.214372	0.212347	0.21429	0.214451	0.214449	0.212694	0.212554	0.214815	0.213242	0.213004	0.213478	0.211818	0.212015	0.211903	0.211736	0.212633
3	SIPA1_MOUSE|P46062_S53_S65	0.209612	0.207493	0.212535	0.215028	0.217402	0.214845	0.215156	0.213429	0.216925	0.21334	0.213117	0.208995	0.210191	0.214245	0.212807	0.214942	0.215169	0.212767	0.211956	0.212602	0.213933	0.213635	0.213394	0.209991	0.215164	0.214117	0.214304	0.213566	0.214372	0.212347	0.21429	0.214451	0.214449	0.212694	0.212554	0.214815	0.213242	0.213004	0.213478	0.211818	0.212015	0.211903	0.211736	0.212633
3	SIPA1_MOUSE|P46062_S72	0.211916	0.208269	0.211233	0.212176	0.216433	0.214388	0.21586	0.210049	0.215382	0.211218	0.213488	0.213953	0.211432	0.21247	0.213733	0.215697	0.215872	0.216158	0.21066	0.213756	0.212547	0.213486	0.213394	0.209991	0.215164	0.214117	0.214304	0.213566	0.214372	0.212347	0.21429	0.214451	0.214449	0.212694	0.212554	0.214815	0.213242	0.213004	0.213478	0.211818	0.212015	0.211903	0.211736	0.212633
3	SLK_MOUSE|O54988_S347	0.21275	0.212067	0.213306	0.212489	0.213449	0.213602	0.21311	0.213084	0.216335	0.212751	0.213629	0.211033	0.211078	0.212531	0.213525	0.212898	0.214062	0.213384	0.213273	0.214149	0.214621	0.213229	0.21409	0.213055	0.216919	0.212681	0.214749	0.214657	0.214397	0.212779	0.214238	0.213991	0.213683	0.214275	0.212469	0.212967	0.212193	0.212717	0.21124	0.213132	0.211528	0.211212	0.210591	0.212749
3	SLK_MOUSE|O54988_S348	0.21073	0.212393	0.210963	0.212363	0.214204	0.212197	0.21603	0.2105	0.209753	0.212538	0.2158	0.212137	0.210917	0.210685	0.219022	0.212788	0.212016	0.2118	0.218776	0.21383	0.216282	0.214359	0.21409	0.213055	0.216919	0.212681	0.214749	0.214657	0.214397	0.212779	0.214238	0.213991	0.213683	0.214275	0.212469	0.212967	0.212193	0.212717	0.21124	0.213132	0.211528	0.211212	0.210591	0.212749
3	SMAD1_MOUSE|P70340_S132	0.210426	0.209905	0.21066	0.213658	0.211614	0.214368	0.215366	0.216875	0.218091	0.217324	0.216236	0.208227	0.208542	0.211538	0.212613	0.212616	0.211494	0.211501	0.216276	0.215011	0.212659	0.215018	0.214595	0.213464	0.214403	0.214654	0.216057	0.214461	0.21593	0.213314	0.215943	0.213743	0.214364	0.213119	0.212098	0.2137	0.212078	0.21137	0.21177	0.213525	0.209237	0.211504	0.21037	0.210545
3	SMBT1_MOUSE|Q9JMD1_T739	0.215561	0.20973	0.210161	0.211062	0.219523	0.214001	0.213495	0.210604	0.217631	0.213844	0.212576	0.208284	0.209471	0.211305	0.213849	0.213434	0.214099	0.217121	0.213202	0.212042	0.212538	0.216483	0.214572	0.21067	0.215868	0.214871	0.213738	0.212799	0.215358	0.211174	0.211854	0.214246	0.211854	0.213546	0.212346	0.215823	0.213342	0.214246	0.211818	0.21592	0.211761	0.211922	0.21002	0.212518
3	SMCR8_MOUSE|Q3UMB5_S497	0.204758	0.216495	0.215878	0.214921	0.215712	0.211992	0.212089	0.208416	0.216299	0.214788	0.211628	0.20677	0.21084	0.212824	0.214727	0.219344	0.213148	0.215911	0.214477	0.216126	0.209742	0.212933	0.211294	0.213817	0.215454	0.213125	0.212138	0.213235	0.21264	0.213231	0.212063	0.212306	0.21313	0.213089	0.212729	0.213386	0.213459	0.214552	0.213115	0.213952	0.214261	0.213882	0.212851	0.212664
3	SMRC1_MOUSE|P97496_S572	0.214827	0.213964	0.206735	0.216245	0.215601	0.213931	0.21335	0.213419	0.212082	0.213309	0.21291	0.211224	0.210726	0.216385	0.213948	0.216314	0.21448	0.215501	0.213899	0.208768	0.212091	0.210407	0.214041	0.211092	0.213786	0.214814	0.213054	0.215378	0.214216	0.214772	0.214583	0.215796	0.214082	0.213848	0.211052	0.212191	0.212292	0.211454	0.212088	0.212264	0.211839	0.212043	0.213044	0.212588
3	SMRD2_MOUSE|Q99JR8_T217	0.20907	0.211882	0.210503	0.21343	0.214514	0.211022	0.21376	0.216755	0.20906	0.214621	0.215155	0.210107	0.209412	0.212578	0.216054	0.221032	0.215198	0.215274	0.21588	0.209117	0.211907	0.213623	0.214137	0.213385	0.216024	0.213929	0.215101	0.214367	0.213383	0.212864	0.214029	0.213272	0.212878	0.212293	0.213151	0.212427	0.212023	0.211633	0.212749	0.21286	0.212712	0.211868	0.213842	0.211425
3	SNP23_MOUSE|O09044_S116	0.204504	0.207707	0.212131	0.208036	0.214326	0.210603	0.213969	0.214261	0.213863	0.215862	0.218797	0.209789	0.211003	0.211497	0.213893	0.216774	0.212105	0.213882	0.219489	0.218362	0.212467	0.216406	0.212701	0.215653	0.213913	0.212552	0.212092	0.21196	0.210871	0.21304	0.212762	0.210063	0.208609	0.214193	0.215664	0.21398	0.212079	0.21328	0.214183	0.214947	0.213155	0.214487	0.215174	0.2149
3	SNP29_MOUSE|Q9ERB0_S65	0.209614	0.204236	0.210588	0.212593	0.213754	0.217498	0.213797	0.210886	0.210488	0.215139	0.211319	0.214247	0.213989	0.217438	0.213998	0.218987	0.215912	0.211656	0.212693	0.215413	0.211694	0.213982	0.214365	0.20631	0.213656	0.214483	0.214804	0.215096	0.212026	0.213609	0.214082	0.21336	0.21023	0.213269	0.214924	0.217792	0.212487	0.212887	0.216448	0.211626	0.208944	0.211839	0.214549	0.213332
3	SNX1_MOUSE|Q9WV80_S280	0.205025	0.207011	0.208763	0.216549	0.219224	0.215524	0.217747	0.212903	0.21183	0.214464	0.213722	0.207188	0.209462	0.211642	0.216692	0.220825	0.216379	0.216841	0.213236	0.212203	0.210536	0.21181	0.211945	0.20892	0.216711	0.213818	0.214598	0.212803	0.215141	0.21159	0.213994	0.214447	0.215159	0.212544	0.213237	0.214382	0.212319	0.214359	0.21151	0.214453	0.212206	0.212786	0.210677	0.212669
3	SNX17_MOUSE|Q8BVL3_S335	0.208552	0.211584	0.211895	0.210808	0.210203	0.212242	0.215705	0.215979	0.219483	0.218144	0.220405	0.208057	0.211794	0.207628	0.212316	0.210782	0.21028	0.209385	0.22102	0.215777	0.21375	0.213855	0.213309	0.215777	0.215594	0.214334	0.215498	0.214602	0.213679	0.213599	0.213453	0.213548	0.214848	0.21208	0.213564	0.211297	0.212496	0.210817	0.211516	0.211342	0.213501	0.211483	0.210773	0.213188
3	SNX17_MOUSE|Q8BVL3_S336	0.208297	0.206041	0.20906	0.213561	0.21136	0.213776	0.217139	0.217544	0.220885	0.221272	0.224775	0.206184	0.21102	0.204666	0.213601	0.207979	0.20984	0.207604	0.218523	0.216496	0.214287	0.215031	0.213309	0.215777	0.215594	0.214334	0.215498	0.214602	0.213679	0.213599	0.213453	0.213548	0.214848	0.21208	0.213564	0.211297	0.212496	0.210817	0.211516	0.211342	0.213501	0.211483	0.210773	0.213188
3	SNX17_MOUSE|Q8BVL3_S421	0.207973	0.208313	0.211616	0.215831	0.213696	0.21456	0.214237	0.21708	0.216672	0.2199	0.217964	0.20908	0.210598	0.208153	0.212986	0.213903	0.211264	0.211433	0.214355	0.212264	0.212649	0.215367	0.213309	0.215777	0.215594	0.214334	0.215498	0.214602	0.213679	0.213599	0.213453	0.213548	0.214848	0.21208	0.213564	0.211297	0.212496	0.210817	0.211516	0.211342	0.213501	0.211483	0.210773	0.213188
3	SNX5_MOUSE|Q9D8U8_S151	0.204396	0.204995	0.206518	0.214536	0.219202	0.214184	0.2166	0.212664	0.217891	0.214521	0.218852	0.206464	0.207184	0.208055	0.215043	0.215161	0.216373	0.216955	0.215939	0.216525	0.212431	0.214857	0.213221	0.212516	0.214957	0.214751	0.215842	0.213423	0.214727	0.212613	0.215133	0.213532	0.214904	0.211587	0.212116	0.214543	0.212679	0.211892	0.212016	0.213321	0.212441	0.211462	0.211357	0.211283
3	SON_MOUSE|Q9QX47_S256	0.204637	0.205001	0.206834	0.216289	0.216345	0.213943	0.214688	0.21126	0.209483	0.213826	0.214163	0.208992	0.214232	0.210573	0.215262	0.216865	0.217987	0.212154	0.221022	0.214077	0.218327	0.21357	0.214	0.210535	0.215013	0.214298	0.213724	0.212873	0.213547	0.21362	0.214794	0.213811	0.21407	0.212806	0.212314	0.213554	0.212358	0.212511	0.21329	0.212986	0.212265	0.211138	0.214054	0.212796
3	SOS1_MOUSE|Q62245_S1147	0.214788	0.209094	0.208955	0.214983	0.223582	0.217371	0.215228	0.209041	0.210218	0.20569	0.207298	0.207265	0.216104	0.209129	0.213896	0.2205	0.225722	0.221416	0.208351	0.209257	0.210435	0.210499	0.214728	0.215411	0.216263	0.214221	0.213578	0.213268	0.213221	0.212762	0.214564	0.211617	0.212806	0.213446	0.21253	0.213099	0.211994	0.212262	0.21296	0.213053	0.210644	0.212572	0.212658	0.212678
3	SOS1_MOUSE|Q62245_S1164	0.210757	0.214889	0.211874	0.215379	0.216045	0.215003	0.214034	0.211696	0.213397	0.211355	0.210685	0.210353	0.21154	0.213696	0.214812	0.215634	0.216411	0.214616	0.212589	0.212748	0.211517	0.211202	0.214728	0.215411	0.216263	0.214221	0.213578	0.213268	0.213221	0.212762	0.214564	0.211617	0.212806	0.213446	0.21253	0.213099	0.211994	0.212262	0.21296	0.213053	0.210644	0.212572	0.212658	0.212678
3	SPAG7_MOUSE|Q7TNE3_S202	0.205421	0.223268	0.218592	0.215793	0.220075	0.213015	0.211308	0.211588	0.215159	0.207746	0.209975	0.201979	0.200125	0.21841	0.215987	0.223503	0.215918	0.217336	0.212711	0.212701	0.208285	0.209655	0.214314	0.209909	0.217944	0.215208	0.215077	0.216274	0.215752	0.215356	0.214445	0.215845	0.215198	0.211997	0.210881	0.212145	0.212542	0.210571	0.210913	0.212722	0.210892	0.210252	0.210478	0.211418
3	SPD2A_MOUSE|O89032_S1029	0.208779	0.217153	0.214356	0.216935	0.220289	0.215951	0.21444	0.215582	0.214606	0.212807	0.212017	0.205024	0.209562	0.212864	0.210917	0.214405	0.209216	0.216173	0.214219	0.212211	0.210701	0.211644	0.216381	0.217986	0.218587	0.214992	0.213752	0.214948	0.21319	0.216309	0.213445	0.214379	0.213186	0.213286	0.209895	0.211135	0.211357	0.209845	0.210054	0.213209	0.211804	0.209632	0.211605	0.211111
3	SPD2B_MOUSE|A2AAY5_S290	0.208678	0.215878	0.211264	0.214259	0.21956	0.215414	0.211324	0.212476	0.212742	0.214136	0.210283	0.210922	0.208659	0.206958	0.215769	0.218281	0.215616	0.217684	0.210526	0.211768	0.213102	0.214585	0.214144	0.216154	0.216434	0.212125	0.213867	0.213503	0.211696	0.21236	0.21325	0.212163	0.211734	0.213948	0.214487	0.212961	0.212405	0.212884	0.213436	0.213165	0.211606	0.213118	0.212246	0.212648
3	SPD2B_MOUSE|A2AAY5_S291	0.207665	0.214255	0.210115	0.213352	0.221994	0.217078	0.213401	0.211616	0.21471	0.215061	0.210324	0.209977	0.209216	0.20462	0.215801	0.217949	0.215611	0.219643	0.209387	0.212687	0.211684	0.213463	0.214144	0.216154	0.216434	0.212125	0.213867	0.213503	0.211696	0.21236	0.21325	0.212163	0.211734	0.213948	0.214487	0.212961	0.212405	0.212884	0.213436	0.213165	0.211606	0.213118	0.212246	0.212648
3	SPEG_MOUSE|Q62407_S2135	0.208241	0.209982	0.213093	0.211474	0.211819	0.213066	0.212347	0.215452	0.210178	0.214741	0.213542	0.210617	0.210659	0.215982	0.215869	0.216648	0.213051	0.212776	0.218319	0.214557	0.215734	0.211953	0.213541	0.21219	0.218466	0.212569	0.21037	0.213593	0.212152	0.212605	0.211448	0.210533	0.214021	0.214428	0.214266	0.214122	0.213501	0.213592	0.212112	0.213334	0.213747	0.212974	0.212691	0.214028
3	SPEG_MOUSE|Q62407_S2182	0.211506	0.209845	0.212746	0.212123	0.213505	0.214936	0.215242	0.207256	0.209847	0.210746	0.210895	0.210989	0.212194	0.210681	0.216351	0.220134	0.216306	0.218722	0.215228	0.215562	0.212727	0.212401	0.213541	0.21219	0.218466	0.212569	0.21037	0.213593	0.212152	0.212605	0.211448	0.210533	0.214021	0.214428	0.214266	0.214122	0.213501	0.213592	0.212112	0.213334	0.213747	0.212974	0.212691	0.214028
3	SPEG_MOUSE|Q62407_S2944	0.20791	0.211719	0.212942	0.217728	0.220405	0.217131	0.217356	0.21274	0.215633	0.211647	0.213395	0.203734	0.202986	0.210118	0.214719	0.21851	0.217213	0.216856	0.211021	0.214345	0.210892	0.210418	0.213541	0.21219	0.218466	0.212569	0.21037	0.213593	0.212152	0.212605	0.211448	0.210533	0.214021	0.214428	0.214266	0.214122	0.213501	0.213592	0.212112	0.213334	0.213747	0.212974	0.212691	0.214028
3	SPG20_MOUSE|Q8R1X6_S126	0.210729	0.21172	0.213207	0.218001	0.218151	0.21802	0.216352	0.219669	0.22157	0.218127	0.216773	0.202468	0.205656	0.208067	0.210462	0.210527	0.211029	0.211394	0.211524	0.212127	0.211103	0.212643	0.215166	0.212585	0.218285	0.216768	0.218235	0.217469	0.216774	0.215237	0.217413	0.216914	0.214662	0.210095	0.208426	0.211215	0.210466	0.210721	0.211772	0.211741	0.209051	0.208392	0.209012	0.2094
3	SRGP2_MOUSE|Q91Z67_S994	0.204755	0.210302	0.212092	0.213282	0.219325	0.21661	0.213954	0.209349	0.210568	0.211359	0.211417	0.210835	0.207637	0.213914	0.217967	0.222957	0.216707	0.217984	0.212858	0.213028	0.210616	0.212061	0.213628	0.21218	0.214677	0.211952	0.213322	0.21248	0.212921	0.21106	0.212981	0.212216	0.213091	0.214156	0.213966	0.214775	0.213824	0.214561	0.213529	0.213576	0.212392	0.212988	0.213051	0.213046
3	SRGP2_MOUSE|Q91Z67_T982	0.203036	0.20905	0.202689	0.209431	0.218677	0.211061	0.20957	0.214365	0.214172	0.213483	0.211427	0.216357	0.210964	0.212546	0.216343	0.215762	0.213412	0.218245	0.209496	0.220148	0.21726	0.221732	0.213628	0.21218	0.214677	0.211952	0.213322	0.21248	0.212921	0.21106	0.212981	0.212216	0.213091	0.214156	0.213966	0.214775	0.213824	0.214561	0.213529	0.213576	0.212392	0.212988	0.213051	0.213046
3	SRP14_MOUSE|P16254_S44	0.215619	0.205634	0.211845	0.216404	0.217506	0.214542	0.21781	0.209098	0.20758	0.20925	0.208451	0.210928	0.213807	0.213327	0.217265	0.217062	0.220872	0.221159	0.21014	0.210315	0.210845	0.210029	0.213599	0.216893	0.209063	0.214444	0.212225	0.212017	0.211984	0.214901	0.214736	0.210837	0.212399	0.207431	0.214016	0.214835	0.212965	0.21338	0.216862	0.211714	0.217526	0.21232	0.212606	0.213381
3	SRPK2_MOUSE|O54781_S487	0.205961	0.213306	0.21479	0.214724	0.215906	0.212998	0.214274	0.214362	0.215672	0.215445	0.211888	0.206838	0.206723	0.213656	0.215839	0.216335	0.21334	0.214519	0.213957	0.214637	0.213711	0.211094	0.215067	0.212712	0.215399	0.213549	0.21373	0.212648	0.214911	0.211707	0.213367	0.215014	0.214385	0.217573	0.211387	0.214379	0.213779	0.212321	0.211528	0.213987	0.210153	0.210476	0.20935	0.212809
3	SRPK2_MOUSE|O54781_S489	0.207303	0.211888	0.21622	0.216274	0.217013	0.212625	0.212652	0.216512	0.217219	0.213745	0.212736	0.206102	0.209261	0.214255	0.213457	0.213577	0.213031	0.215007	0.212636	0.212174	0.213526	0.212802	0.215067	0.212712	0.215399	0.213549	0.21373	0.212648	0.214911	0.211707	0.213367	0.215014	0.214385	0.217573	0.211387	0.214379	0.213779	0.212321	0.211528	0.213987	0.210153	0.210476	0.20935	0.212809
3	SRPK2_MOUSE|O54781_S490	0.20515	0.207313	0.206106	0.216583	0.215019	0.214409	0.216836	0.215029	0.214309	0.216392	0.214885	0.209629	0.209573	0.210289	0.216238	0.214815	0.213756	0.214467	0.215601	0.214694	0.215249	0.21347	0.215067	0.212712	0.215399	0.213549	0.21373	0.212648	0.214911	0.211707	0.213367	0.215014	0.214385	0.217573	0.211387	0.214379	0.213779	0.212321	0.211528	0.213987	0.210153	0.210476	0.20935	0.212809
3	SRRM1_MOUSE|Q52KI8_S387_S391	0.211284	0.210761	0.211147	0.214639	0.214554	0.212981	0.213442	0.213069	0.2151	0.212049	0.212857	0.210321	0.210892	0.212	0.214746	0.212825	0.215216	0.215536	0.213698	0.213887	0.215091	0.21419	0.214923	0.211442	0.216365	0.213591	0.216157	0.211457	0.209367	0.213815	0.211034	0.212025	0.212474	0.212601	0.210791	0.213661	0.213394	0.212217	0.216218	0.215161	0.212725	0.211078	0.214278	0.215453
3	SRRM1_MOUSE|Q52KI8_S400	0.21091	0.210873	0.21141	0.215547	0.216697	0.21415	0.212975	0.212744	0.212985	0.212943	0.212985	0.209851	0.208934	0.211079	0.215383	0.215802	0.216108	0.215382	0.212808	0.212192	0.212807	0.215619	0.214923	0.211442	0.216365	0.213591	0.216157	0.211457	0.209367	0.213815	0.211034	0.212025	0.212474	0.212601	0.210791	0.213661	0.213394	0.212217	0.216218	0.215161	0.212725	0.211078	0.214278	0.215453
3	SRRM1_MOUSE|Q52KI8_S401	0.20983	0.208489	0.217462	0.214288	0.216629	0.215374	0.215884	0.211981	0.212726	0.218799	0.216956	0.20997	0.208791	0.206546	0.215046	0.21619	0.212592	0.211677	0.213315	0.211852	0.213333	0.212179	0.214923	0.211442	0.216365	0.213591	0.216157	0.211457	0.209367	0.213815	0.211034	0.212025	0.212474	0.212601	0.210791	0.213661	0.213394	0.212217	0.216218	0.215161	0.212725	0.211078	0.214278	0.215453
3	SRRM1_MOUSE|Q52KI8_S624	0.211147	0.207786	0.214982	0.217324	0.216565	0.213981	0.213193	0.215379	0.217237	0.212615	0.213655	0.207468	0.211197	0.211085	0.212678	0.210981	0.216422	0.216073	0.211683	0.211471	0.213536	0.213588	0.214923	0.211442	0.216365	0.213591	0.216157	0.211457	0.209367	0.213815	0.211034	0.212025	0.212474	0.212601	0.210791	0.213661	0.213394	0.212217	0.216218	0.215161	0.212725	0.211078	0.214278	0.215453
3	SRRM1_MOUSE|Q52KI8_S626	0.209128	0.209465	0.209536	0.216348	0.215555	0.214037	0.213515	0.213423	0.214295	0.213699	0.212993	0.210126	0.207377	0.209794	0.215478	0.214624	0.217688	0.216832	0.214048	0.213539	0.214275	0.214264	0.214923	0.211442	0.216365	0.213591	0.216157	0.211457	0.209367	0.213815	0.211034	0.212025	0.212474	0.212601	0.210791	0.213661	0.213394	0.212217	0.216218	0.215161	0.212725	0.211078	0.214278	0.215453
3	SRRM1_MOUSE|Q52KI8_S645	0.212454	0.207209	0.210152	0.218582	0.215841	0.213983	0.214492	0.214834	0.216068	0.214761	0.213713	0.207461	0.209264	0.209727	0.212702	0.213008	0.215215	0.216823	0.21233	0.212008	0.214915	0.214449	0.214923	0.211442	0.216365	0.213591	0.216157	0.211457	0.209367	0.213815	0.211034	0.212025	0.212474	0.212601	0.210791	0.213661	0.213394	0.212217	0.216218	0.215161	0.212725	0.211078	0.214278	0.215453
3	SRRM1_MOUSE|Q52KI8_S725_S731	0.209722	0.206131	0.211325	0.21385	0.216386	0.213862	0.2167	0.215635	0.219807	0.21412	0.21837	0.205644	0.208561	0.203167	0.214716	0.210464	0.214114	0.215496	0.215142	0.213445	0.217726	0.215123	0.214923	0.211442	0.216365	0.213591	0.216157	0.211457	0.209367	0.213815	0.211034	0.212025	0.212474	0.212601	0.210791	0.213661	0.213394	0.212217	0.216218	0.215161	0.212725	0.211078	0.214278	0.215453
3	SRRM1_MOUSE|Q52KI8_S810	0.211662	0.210314	0.210436	0.214668	0.218116	0.213029	0.213424	0.209854	0.210145	0.210886	0.211226	0.210834	0.212451	0.210122	0.216321	0.215027	0.218133	0.215793	0.215124	0.211835	0.216451	0.214209	0.214923	0.211442	0.216365	0.213591	0.216157	0.211457	0.209367	0.213815	0.211034	0.212025	0.212474	0.212601	0.210791	0.213661	0.213394	0.212217	0.216218	0.215161	0.212725	0.211078	0.214278	0.215453
3	SRRM2_MOUSE|Q8BTI8_S1077	0.214251	0.209289	0.216025	0.217266	0.218501	0.217105	0.217049	0.209607	0.207341	0.211391	0.20846	0.213959	0.211991	0.212694	0.216289	0.215071	0.216276	0.214698	0.210858	0.207776	0.213281	0.210677	0.212398	0.209128	0.214516	0.21455	0.213942	0.213208	0.212924	0.213517	0.214564	0.213106	0.212881	0.212285	0.211881	0.212131	0.213307	0.212664	0.215229	0.214581	0.212767	0.21197	0.214291	0.214486
3	SRRM2_MOUSE|Q8BTI8_S1214	0.201234	0.208369	0.209789	0.21897	0.221007	0.210487	0.212233	0.214334	0.217155	0.213044	0.212922	0.199484	0.207294	0.218237	0.216047	0.217084	0.211919	0.214203	0.215411	0.215219	0.218089	0.216443	0.212398	0.209128	0.214516	0.21455	0.213942	0.213208	0.212924	0.213517	0.214564	0.213106	0.212881	0.212285	0.211881	0.212131	0.213307	0.212664	0.215229	0.214581	0.212767	0.21197	0.214291	0.214486
3	SRRM2_MOUSE|Q8BTI8_S1230	0.208997	0.206262	0.212869	0.212482	0.214472	0.212378	0.213841	0.211681	0.211101	0.211214	0.211246	0.210517	0.214463	0.207626	0.215157	0.212815	0.21875	0.217398	0.219856	0.214183	0.216687	0.215858	0.212398	0.209128	0.214516	0.21455	0.213942	0.213208	0.212924	0.213517	0.214564	0.213106	0.212881	0.212285	0.211881	0.212131	0.213307	0.212664	0.215229	0.214581	0.212767	0.21197	0.214291	0.214486
3	SRRM2_MOUSE|Q8BTI8_S1338	0.208449	0.212555	0.213239	0.21715	0.215501	0.21574	0.214863	0.215298	0.214314	0.214371	0.213277	0.207483	0.207275	0.211444	0.21662	0.213273	0.213886	0.214008	0.214005	0.212684	0.21149	0.213142	0.212398	0.209128	0.214516	0.21455	0.213942	0.213208	0.212924	0.213517	0.214564	0.213106	0.212881	0.212285	0.211881	0.212131	0.213307	0.212664	0.215229	0.214581	0.212767	0.21197	0.214291	0.214486
3	SRRM2_MOUSE|Q8BTI8_S1339	0.20886	0.212826	0.212707	0.216815	0.21522	0.215965	0.214069	0.214154	0.214613	0.214894	0.212347	0.208441	0.207804	0.210292	0.216393	0.213023	0.214099	0.214386	0.213216	0.214072	0.213164	0.212763	0.212398	0.209128	0.214516	0.21455	0.213942	0.213208	0.212924	0.213517	0.214564	0.213106	0.212881	0.212285	0.211881	0.212131	0.213307	0.212664	0.215229	0.214581	0.212767	0.21197	0.214291	0.214486
3	SRRM2_MOUSE|Q8BTI8_S1339_S1343	0.210059	0.212001	0.213685	0.213509	0.216671	0.213498	0.214864	0.209727	0.214079	0.211024	0.212326	0.208661	0.207677	0.210484	0.217135	0.216035	0.215127	0.216252	0.216671	0.211795	0.214829	0.213939	0.212398	0.209128	0.214516	0.21455	0.213942	0.213208	0.212924	0.213517	0.214564	0.213106	0.212881	0.212285	0.211881	0.212131	0.213307	0.212664	0.215229	0.214581	0.212767	0.21197	0.214291	0.214486
3	SRRM2_MOUSE|Q8BTI8_S1378	0.206219	0.209566	0.211859	0.217802	0.216326	0.21758	0.21692	0.212566	0.211947	0.213959	0.213918	0.207444	0.205531	0.209386	0.217568	0.2183	0.216513	0.214472	0.213822	0.214166	0.211279	0.212567	0.212398	0.209128	0.214516	0.21455	0.213942	0.213208	0.212924	0.213517	0.214564	0.213106	0.212881	0.212285	0.211881	0.212131	0.213307	0.212664	0.215229	0.214581	0.212767	0.21197	0.214291	0.214486
3	SRRM2_MOUSE|Q8BTI8_S1399	0.207233	0.218906	0.215093	0.216484	0.213025	0.214485	0.213516	0.216867	0.21807	0.214032	0.212285	0.205571	0.207866	0.213687	0.212625	0.210071	0.213157	0.212598	0.216424	0.217048	0.209131	0.21162	0.212398	0.209128	0.214516	0.21455	0.213942	0.213208	0.212924	0.213517	0.214564	0.213106	0.212881	0.212285	0.211881	0.212131	0.213307	0.212664	0.215229	0.214581	0.212767	0.21197	0.214291	0.214486
3	SRRM2_MOUSE|Q8BTI8_S1434	0.205106	0.210698	0.20841	0.213423	0.215452	0.214008	0.214671	0.21072	0.215266	0.213705	0.213666	0.201871	0.204382	0.212455	0.21955	0.223028	0.219189	0.214523	0.219278	0.21449	0.213389	0.211881	0.212398	0.209128	0.214516	0.21455	0.213942	0.213208	0.212924	0.213517	0.214564	0.213106	0.212881	0.212285	0.211881	0.212131	0.213307	0.212664	0.215229	0.214581	0.212767	0.21197	0.214291	0.214486
3	SRRM2_MOUSE|Q8BTI8_S1497	0.205651	0.208616	0.207611	0.214627	0.214082	0.215205	0.216998	0.21602	0.215553	0.213251	0.213307	0.207952	0.207695	0.209356	0.216492	0.214388	0.216791	0.216358	0.215727	0.216744	0.213085	0.21427	0.212398	0.209128	0.214516	0.21455	0.213942	0.213208	0.212924	0.213517	0.214564	0.213106	0.212881	0.212285	0.211881	0.212131	0.213307	0.212664	0.215229	0.214581	0.212767	0.21197	0.214291	0.214486
3	SRRM2_MOUSE|Q8BTI8_S1533	0.205947	0.21255	0.212654	0.216203	0.221337	0.209747	0.211225	0.213517	0.210556	0.209404	0.211376	0.208259	0.205647	0.222643	0.217078	0.220355	0.214433	0.215111	0.209902	0.212403	0.213978	0.215089	0.212398	0.209128	0.214516	0.21455	0.213942	0.213208	0.212924	0.213517	0.214564	0.213106	0.212881	0.212285	0.211881	0.212131	0.213307	0.212664	0.215229	0.214581	0.212767	0.21197	0.214291	0.214486
3	SRRM2_MOUSE|Q8BTI8_S1647_S1650	0.209	0.212528	0.209977	0.215091	0.213635	0.213392	0.213693	0.21168	0.21503	0.211958	0.211822	0.210114	0.209537	0.211532	0.216522	0.214148	0.216255	0.21542	0.214753	0.215358	0.214715	0.214013	0.212398	0.209128	0.214516	0.21455	0.213942	0.213208	0.212924	0.213517	0.214564	0.213106	0.212881	0.212285	0.211881	0.212131	0.213307	0.212664	0.215229	0.214581	0.212767	0.21197	0.214291	0.214486
3	SRRM2_MOUSE|Q8BTI8_S1813	0.209833	0.211288	0.207918	0.217312	0.215044	0.215565	0.215383	0.212775	0.214326	0.214065	0.213744	0.208431	0.209036	0.206958	0.215548	0.215192	0.215353	0.214678	0.214167	0.213893	0.214138	0.21535	0.212398	0.209128	0.214516	0.21455	0.213942	0.213208	0.212924	0.213517	0.214564	0.213106	0.212881	0.212285	0.211881	0.212131	0.213307	0.212664	0.215229	0.214581	0.212767	0.21197	0.214291	0.214486
3	SRRM2_MOUSE|Q8BTI8_S1972_T1974	0.213141	0.209611	0.209539	0.214103	0.20986	0.215681	0.214683	0.213341	0.212515	0.208874	0.210271	0.213344	0.210856	0.214093	0.215967	0.214153	0.219567	0.217416	0.212749	0.21565	0.213747	0.21088	0.212398	0.209128	0.214516	0.21455	0.213942	0.213208	0.212924	0.213517	0.214564	0.213106	0.212881	0.212285	0.211881	0.212131	0.213307	0.212664	0.215229	0.214581	0.212767	0.21197	0.214291	0.214486
3	SRRM2_MOUSE|Q8BTI8_S2052_S2054	0.21271	0.214233	0.211615	0.210881	0.217275	0.215666	0.21233	0.212784	0.21529	0.214511	0.213644	0.214012	0.212453	0.209837	0.214228	0.213574	0.214195	0.214377	0.209703	0.212633	0.212395	0.211905	0.212398	0.209128	0.214516	0.21455	0.213942	0.213208	0.212924	0.213517	0.214564	0.213106	0.212881	0.212285	0.211881	0.212131	0.213307	0.212664	0.215229	0.214581	0.212767	0.21197	0.214291	0.214486
3	SRRM2_MOUSE|Q8BTI8_S351	0.209463	0.21109	0.210097	0.216466	0.213506	0.213769	0.213548	0.21258	0.213192	0.213135	0.211912	0.209963	0.209601	0.213567	0.215956	0.215371	0.215615	0.214609	0.214396	0.214363	0.214631	0.213378	0.212398	0.209128	0.214516	0.21455	0.213942	0.213208	0.212924	0.213517	0.214564	0.213106	0.212881	0.212285	0.211881	0.212131	0.213307	0.212664	0.215229	0.214581	0.212767	0.21197	0.214291	0.214486
3	SRRM2_MOUSE|Q8BTI8_S773	0.210373	0.208264	0.203899	0.217799	0.21906	0.215437	0.214724	0.2137	0.213339	0.212919	0.210529	0.205935	0.20715	0.212142	0.217136	0.217951	0.221094	0.216663	0.21285	0.211066	0.215625	0.211812	0.212398	0.209128	0.214516	0.21455	0.213942	0.213208	0.212924	0.213517	0.214564	0.213106	0.212881	0.212285	0.211881	0.212131	0.213307	0.212664	0.215229	0.214581	0.212767	0.21197	0.214291	0.214486
3	SRRM2_MOUSE|Q8BTI8_S773_S777	0.2157	0.208522	0.204149	0.213838	0.211407	0.218117	0.216891	0.214027	0.213268	0.212172	0.213008	0.213783	0.213966	0.208745	0.213872	0.212012	0.218598	0.215025	0.214268	0.213725	0.213302	0.21152	0.212398	0.209128	0.214516	0.21455	0.213942	0.213208	0.212924	0.213517	0.214564	0.213106	0.212881	0.212285	0.211881	0.212131	0.213307	0.212664	0.215229	0.214581	0.212767	0.21197	0.214291	0.214486
3	SRRM2_MOUSE|Q8BTI8_S775	0.209365	0.206727	0.204149	0.215598	0.215464	0.21519	0.215148	0.215351	0.216287	0.212988	0.211275	0.207562	0.208765	0.210676	0.213946	0.21378	0.21936	0.216119	0.215634	0.21541	0.216333	0.21458	0.212398	0.209128	0.214516	0.21455	0.213942	0.213208	0.212924	0.213517	0.214564	0.213106	0.212881	0.212285	0.211881	0.212131	0.213307	0.212664	0.215229	0.214581	0.212767	0.21197	0.214291	0.214486
3	SRS10_MOUSE|Q9R0U0_S106	0.210816	0.208931	0.215511	0.21559	0.216253	0.221183	0.218366	0.211428	0.213046	0.216355	0.214896	0.212264	0.21077	0.211245	0.212459	0.217694	0.213104	0.211031	0.210296	0.211925	0.206276	0.210384	0.214506	0.212704	0.204797	0.21511	0.214109	0.214542	0.212714	0.213696	0.213998	0.214078	0.212351	0.213172	0.212897	0.21558	0.213144	0.213823	0.214588	0.210568	0.214045	0.210633	0.214915	0.214194
3	SRSF1_MOUSE|Q6PDM2_S199	0.213007	0.205821	0.209472	0.215787	0.217175	0.213362	0.212106	0.216754	0.217413	0.213721	0.211685	0.208093	0.211955	0.213885	0.212751	0.211634	0.216444	0.214402	0.210474	0.211171	0.217181	0.21565	0.214044	0.207952	0.213744	0.214927	0.214263	0.213776	0.212458	0.214166	0.214125	0.212538	0.211982	0.212723	0.212408	0.215282	0.212178	0.212866	0.215739	0.212818	0.210845	0.211921	0.215286	0.214227
3	SSFA2_MOUSE|Q922B9_S316	0.20143	0.214597	0.203845	0.2173	0.210278	0.213281	0.212171	0.214793	0.204167	0.211682	0.209215	0.210684	0.205505	0.214712	0.220004	0.232273	0.216757	0.218991	0.210676	0.217861	0.21361	0.214451	0.213807	0.211803	0.215489	0.21321	0.211565	0.211897	0.213188	0.209531	0.210735	0.212461	0.211594	0.215291	0.214374	0.217722	0.214777	0.215157	0.212865	0.213306	0.212392	0.213728	0.211592	0.213765
3	SSFA2_MOUSE|Q922B9_S667	0.198936	0.207326	0.212188	0.213154	0.215797	0.217381	0.213933	0.21157	0.21071	0.210542	0.213849	0.206112	0.208979	0.211372	0.219193	0.226431	0.21684	0.217098	0.215858	0.216148	0.211528	0.214039	0.213807	0.211803	0.215489	0.21321	0.211565	0.211897	0.213188	0.209531	0.210735	0.212461	0.211594	0.215291	0.214374	0.217722	0.214777	0.215157	0.212865	0.213306	0.212392	0.213728	0.211592	0.213765
3	SSH2_MOUSE|Q5SW75_S36	0.208099	0.208455	0.207311	0.216927	0.215624	0.214886	0.214248	0.214616	0.214592	0.213455	0.214458	0.209385	0.217151	0.213768	0.212919	0.213529	0.214748	0.213115	0.214322	0.212792	0.212804	0.212868	0.213402	0.212304	0.211547	0.215138	0.21493	0.214119	0.213849	0.215025	0.212847	0.214657	0.212607	0.214885	0.211105	0.216522	0.210288	0.214825	0.212512	0.21245	0.210044	0.212428	0.21262	0.212171
3	STA5A_MOUSE|P42230_S779	0.210427	0.210663	0.200895	0.212754	0.209509	0.211282	0.21188	0.213247	0.214977	0.21608	0.216044	0.211697	0.209996	0.214042	0.214916	0.215379	0.21449	0.212623	0.218991	0.217519	0.215923	0.216387	0.212013	0.211476	0.216145	0.213191	0.214763	0.213861	0.214329	0.212601	0.216805	0.215094	0.214754	0.211355	0.211346	0.212736	0.21251	0.211546	0.212699	0.212482	0.213607	0.213012	0.211605	0.212366
3	STAG2_MOUSE|O35638_T1112	0.209955	0.212415	0.213703	0.21088	0.211102	0.216273	0.212965	0.216202	0.214734	0.21889	0.21933	0.208341	0.208396	0.209568	0.212738	0.214514	0.20997	0.211192	0.218878	0.216535	0.211021	0.212256	0.215093	0.219223	0.216819	0.214303	0.214375	0.214803	0.212761	0.21498	0.213363	0.214287	0.213206	0.212699	0.211483	0.211077	0.212471	0.210818	0.209737	0.211658	0.210939	0.211897	0.211417	0.21277
3	STIM2_MOUSE|P83093_S640	0.209869	0.212677	0.207457	0.213643	0.209194	0.212053	0.206111	0.212664	0.214656	0.214696	0.215152	0.212523	0.207773	0.203839	0.213431	0.212948	0.215657	0.216088	0.219641	0.218524	0.219942	0.220877	0.214098	0.216862	0.217452	0.209967	0.211147	0.212672	0.207666	0.214432	0.210289	0.211253	0.209536	0.215812	0.216963	0.210414	0.21263	0.210343	0.213746	0.215871	0.211001	0.218063	0.215542	0.214221
3	STX7_MOUSE|O70439_T41	0.206077	0.211155	0.20516	0.214599	0.219485	0.215531	0.212686	0.215642	0.209537	0.212042	0.211756	0.203329	0.206227	0.209957	0.216635	0.22382	0.21845	0.217189	0.217505	0.21225	0.215403	0.214713	0.213845	0.217673	0.217116	0.212727	0.212995	0.212944	0.212098	0.214026	0.211421	0.211977	0.212109	0.212167	0.213548	0.21132	0.213234	0.211946	0.211457	0.212276	0.214002	0.213448	0.213963	0.213994
3	SUGP1_MOUSE|Q8CH02_S134	0.210731	0.205119	0.211731	0.214183	0.211354	0.217736	0.215493	0.21946	0.211144	0.219817	0.220926	0.208347	0.206689	0.20793	0.213615	0.219402	0.21346	0.213345	0.216907	0.210367	0.210504	0.211181	0.214279	0.210709	0.213577	0.214523	0.212585	0.212682	0.213658	0.213344	0.214095	0.213302	0.213488	0.213859	0.212857	0.215299	0.213782	0.212144	0.214054	0.213354	0.211215	0.212137	0.21262	0.212796
3	SUGP1_MOUSE|Q8CH02_T136	0.210592	0.212509	0.204166	0.21496	0.212896	0.21429	0.211946	0.220164	0.211487	0.214682	0.218892	0.207271	0.208468	0.209299	0.213052	0.220284	0.217439	0.212439	0.217339	0.210424	0.215983	0.210989	0.214279	0.210709	0.213577	0.214523	0.212585	0.212682	0.213658	0.213344	0.214095	0.213302	0.213488	0.213859	0.212857	0.215299	0.213782	0.212144	0.214054	0.213354	0.211215	0.212137	0.21262	0.212796
3	SVIL_MOUSE|Q8K4L3_S634	0.210203	0.211155	0.21175	0.212947	0.21198	0.210649	0.215289	0.212873	0.212034	0.211052	0.21597	0.210233	0.211928	0.214759	0.217712	0.216221	0.212021	0.214464	0.215841	0.213213	0.213788	0.214112	0.213341	0.212322	0.21576	0.214147	0.213677	0.212758	0.213485	0.211657	0.212777	0.212385	0.212389	0.21353	0.213128	0.213967	0.214642	0.212047	0.21299	0.214744	0.212526	0.212394	0.212	0.213698
3	SYFA_MOUSE|Q8C0C7_S301	0.207785	0.214598	0.207395	0.211504	0.21488	0.209796	0.211841	0.211523	0.215773	0.210409	0.213374	0.210272	0.20921	0.214327	0.215355	0.217428	0.215842	0.216188	0.215333	0.216825	0.21605	0.214255	0.212935	0.212269	0.213094	0.213141	0.214862	0.21282	0.215599	0.212902	0.21392	0.213512	0.215099	0.213846	0.213186	0.213492	0.213008	0.214079	0.211952	0.214899	0.211227	0.212109	0.210778	0.211608
3	SYN1_MOUSE|O88935_S427	0.210693	0.205195	0.213958	0.209079	0.222563	0.212278	0.217897	0.210414	0.218712	0.210592	0.213262	0.2159	0.215053	0.211134	0.212513	0.211718	0.21322	0.21937	0.207184	0.211502	0.210286	0.217044	0.209717	0.209635	0.217314	0.210816	0.21009	0.207288	0.212361	0.209242	0.210877	0.205789	0.212744	0.216754	0.217234	0.216348	0.213003	0.21759	0.215652	0.218566	0.212508	0.217006	0.213769	0.215452
3	SYNJ1_MOUSE|Q8CHC4_T1354	0.204448	0.211034	0.207929	0.212019	0.214631	0.211826	0.212026	0.211327	0.211855	0.212101	0.212447	0.207532	0.210263	0.212884	0.216875	0.222709	0.219021	0.21719	0.215994	0.218309	0.213503	0.213667	0.212622	0.211383	0.214025	0.211226	0.21313	0.210848	0.210614	0.210931	0.212789	0.21002	0.211692	0.2146	0.214592	0.215333	0.213403	0.214384	0.216703	0.214579	0.213658	0.214073	0.215856	0.213788
3	SYNRG_MOUSE|Q5SV85_S715	0.20531	0.205998	0.20924	0.212457	0.21904	0.212515	0.213317	0.209338	0.212834	0.212437	0.214689	0.21142	0.210869	0.208434	0.216693	0.220347	0.21681	0.217664	0.211235	0.216071	0.214782	0.218098	0.214927	0.210863	0.215958	0.213845	0.213579	0.212319	0.212504	0.21332	0.213693	0.210589	0.211016	0.213196	0.213043	0.215806	0.212373	0.213242	0.215433	0.213618	0.210875	0.211597	0.214303	0.214195
3	T2FA_MOUSE|Q3THK3_S385	0.212917	0.207105	0.210678	0.21712	0.216909	0.217696	0.216593	0.212784	0.213868	0.212906	0.211851	0.209223	0.212368	0.211551	0.214258	0.215514	0.218487	0.216638	0.209695	0.211155	0.209776	0.210842	0.212896	0.210213	0.215022	0.216139	0.21496	0.213528	0.214019	0.214481	0.213584	0.213297	0.212748	0.21332	0.212138	0.215186	0.212694	0.211933	0.213259	0.213929	0.21094	0.210623	0.211837	0.213555
3	T2FA_MOUSE|Q3THK3_T156	0.20792	0.217938	0.21162	0.214185	0.214885	0.21135	0.210747	0.214333	0.217629	0.214649	0.214997	0.206113	0.207294	0.21654	0.214033	0.216319	0.213178	0.211901	0.215195	0.214886	0.210559	0.213641	0.212896	0.210213	0.215022	0.216139	0.21496	0.213528	0.214019	0.214481	0.213584	0.213297	0.212748	0.21332	0.212138	0.215186	0.212694	0.211933	0.213259	0.213929	0.21094	0.210623	0.211837	0.213555
3	T2FA_MOUSE|Q3THK3_T384	0.210961	0.209146	0.211123	0.216713	0.217109	0.217116	0.216953	0.211453	0.211583	0.21213	0.212231	0.211177	0.211079	0.213024	0.215926	0.216766	0.216049	0.215331	0.21088	0.211361	0.21193	0.210019	0.212896	0.210213	0.215022	0.216139	0.21496	0.213528	0.214019	0.214481	0.213584	0.213297	0.212748	0.21332	0.212138	0.215186	0.212694	0.211933	0.213259	0.213929	0.21094	0.210623	0.211837	0.213555
3	TAB2_MOUSE|Q99K90_S450	0.204283	0.213564	0.211358	0.219027	0.22091	0.218307	0.217533	0.212401	0.216794	0.211685	0.210242	0.203336	0.207446	0.212753	0.214667	0.2181	0.216179	0.215081	0.210612	0.215152	0.210062	0.209876	0.214148	0.208935	0.216822	0.215024	0.213788	0.213974	0.212158	0.214282	0.214208	0.213797	0.213621	0.208934	0.212155	0.210487	0.213847	0.211271	0.212952	0.215067	0.21184	0.213278	0.213668	0.215962
3	TAF6_MOUSE|Q62311_S532	0.210718	0.209997	0.211215	0.217785	0.219342	0.219619	0.216727	0.213055	0.213866	0.209837	0.210578	0.20536	0.208984	0.211917	0.213367	0.220411	0.219032	0.217388	0.208168	0.212582	0.208953	0.210607	0.213548	0.212728	0.218295	0.214307	0.213153	0.214685	0.214254	0.215122	0.213297	0.214734	0.213611	0.213751	0.213104	0.213319	0.212041	0.211908	0.211666	0.211032	0.211858	0.210452	0.211713	0.211695
3	TANC1_MOUSE|Q0VGY8_S211	0.212786	0.21723	0.211198	0.216582	0.218718	0.216254	0.213945	0.214756	0.21138	0.213297	0.210652	0.209865	0.207511	0.214838	0.216047	0.214832	0.214316	0.213866	0.212465	0.208209	0.210916	0.210325	0.215473	0.21856	0.218597	0.215782	0.213529	0.214788	0.212632	0.214762	0.214996	0.214619	0.213726	0.212097	0.210977	0.213168	0.211632	0.208671	0.210951	0.209737	0.211201	0.212108	0.209798	0.212272
3	TANC1_MOUSE|Q0VGY8_S445	0.211604	0.214292	0.210207	0.2173	0.21674	0.214529	0.216343	0.216732	0.215957	0.216375	0.215452	0.205117	0.203935	0.210892	0.212786	0.214062	0.212858	0.211457	0.214306	0.213239	0.213271	0.212373	0.215473	0.21856	0.218597	0.215782	0.213529	0.214788	0.212632	0.214762	0.214996	0.214619	0.213726	0.212097	0.210977	0.213168	0.211632	0.208671	0.210951	0.209737	0.211201	0.212108	0.209798	0.212272
3	TASOR_MOUSE|Q69ZR9_S1078	0.20552	0.21307	0.209499	0.211509	0.218284	0.218685	0.214006	0.2114	0.210036	0.212788	0.213607	0.20566	0.203738	0.209801	0.216029	0.227796	0.219418	0.217172	0.214782	0.216843	0.208382	0.21093	0.212875	0.213164	0.217437	0.214346	0.21328	0.213401	0.214561	0.211243	0.212593	0.212821	0.211671	0.214814	0.214732	0.21383	0.212531	0.212544	0.212817	0.212724	0.211429	0.213422	0.211966	0.21212
3	TB182_MOUSE|P58871_S1375	0.204826	0.21083	0.210747	0.215824	0.218303	0.216281	0.216288	0.215056	0.217098	0.214518	0.216647	0.208775	0.212179	0.213323	0.214132	0.21102	0.209796	0.211135	0.21554	0.212917	0.211896	0.212779	0.209053	0.208918	0.213185	0.214775	0.215547	0.213454	0.211999	0.211647	0.212987	0.211253	0.211759	0.212962	0.21332	0.215029	0.213608	0.215088	0.216379	0.214974	0.211023	0.215166	0.213832	0.21426
3	TBC15_MOUSE|Q9CXF4_S655	0.211275	0.206524	0.203935	0.212582	0.213999	0.21723	0.21463	0.214125	0.212642	0.21712	0.214606	0.213493	0.212944	0.211023	0.215481	0.213367	0.21434	0.213505	0.21562	0.213951	0.21162	0.215935	0.213393	0.213807	0.216336	0.215169	0.215006	0.215093	0.214481	0.21465	0.215755	0.214673	0.213527	0.212084	0.210801	0.216091	0.211635	0.211294	0.209777	0.212147	0.211332	0.211219	0.209978	0.21196
3	TBCD1_MOUSE|Q60949_S621	0.202665	0.213782	0.211562	0.212618	0.216314	0.21443	0.213712	0.210845	0.214297	0.214406	0.214306	0.209472	0.20781	0.215504	0.215462	0.219355	0.213066	0.212065	0.214612	0.219559	0.210782	0.213146	0.213807	0.210477	0.215942	0.212313	0.212469	0.212364	0.213318	0.212855	0.212747	0.214234	0.213953	0.214158	0.214377	0.213575	0.212443	0.213351	0.212033	0.214782	0.212358	0.213514	0.211642	0.213634
3	TBCD5_MOUSE|Q80XQ2_S562	0.205773	0.207564	0.208518	0.214119	0.216744	0.21098	0.210182	0.216395	0.216511	0.21758	0.213263	0.208642	0.20927	0.214042	0.212287	0.213084	0.212973	0.215102	0.216346	0.216099	0.217128	0.217187	0.214327	0.21661	0.214988	0.213122	0.214691	0.213637	0.213055	0.213601	0.214971	0.213707	0.212881	0.214006	0.213127	0.213593	0.210992	0.21163	0.210329	0.213375	0.211828	0.211929	0.211571	0.212338
3	TBCD5_MOUSE|Q80XQ2_S565	0.208071	0.209404	0.209373	0.21258	0.218543	0.217265	0.216734	0.210765	0.214675	0.214515	0.214513	0.208833	0.208341	0.207056	0.214823	0.220213	0.215711	0.215714	0.214197	0.213333	0.212437	0.212684	0.214327	0.21661	0.214988	0.213122	0.214691	0.213637	0.213055	0.213601	0.214971	0.213707	0.212881	0.214006	0.213127	0.213593	0.210992	0.21163	0.210329	0.213375	0.211828	0.211929	0.211571	0.212338
3	TBCD5_MOUSE|Q80XQ2_S582	0.209212	0.213172	0.211002	0.21403	0.214475	0.214299	0.213952	0.213729	0.214821	0.215025	0.213826	0.211103	0.212838	0.212813	0.214277	0.21372	0.212618	0.211738	0.21237	0.215497	0.212822	0.21297	0.214327	0.21661	0.214988	0.213122	0.214691	0.213637	0.213055	0.213601	0.214971	0.213707	0.212881	0.214006	0.213127	0.213593	0.210992	0.21163	0.210329	0.213375	0.211828	0.211929	0.211571	0.212338
3	TCEA1_MOUSE|P10711_S100	0.210037	0.207642	0.212023	0.21337	0.210731	0.216089	0.214982	0.213495	0.211842	0.212541	0.214856	0.212231	0.213849	0.208793	0.214799	0.21425	0.213777	0.213337	0.215232	0.216154	0.215849	0.214275	0.215104	0.210799	0.214387	0.210792	0.211994	0.211469	0.210763	0.212007	0.211432	0.212577	0.212	0.215011	0.213772	0.217461	0.214014	0.215134	0.214965	0.214422	0.212629	0.212936	0.213406	0.213191
3	TCF20_MOUSE|Q9EPQ8_S1550	0.21055	0.215881	0.212249	0.21629	0.21934	0.218072	0.215971	0.212623	0.212414	0.213965	0.213454	0.206514	0.206437	0.207363	0.216289	0.21905	0.217051	0.213805	0.211896	0.21053	0.211544	0.208392	0.213727	0.213345	0.215919	0.215336	0.215427	0.213152	0.211474	0.214321	0.216433	0.21296	0.211623	0.209964	0.210626	0.213784	0.212575	0.210071	0.214159	0.21456	0.210703	0.213295	0.213422	0.213374
3	TCOF_MOUSE|O08784_S587	0.204708	0.212522	0.209596	0.217542	0.217955	0.215511	0.216651	0.213795	0.221792	0.215128	0.217152	0.204796	0.211883	0.211873	0.212396	0.214251	0.212181	0.208755	0.214563	0.212268	0.21339	0.210904	0.212649	0.210465	0.21516	0.212464	0.213348	0.210825	0.210803	0.212013	0.21191	0.210177	0.210707	0.214822	0.212921	0.215008	0.213963	0.214901	0.216651	0.216666	0.211155	0.213841	0.21552	0.214245
3	TCPG_MOUSE|P80318_S252	0.207795	0.214605	0.208426	0.213119	0.217676	0.211989	0.214729	0.209706	0.212797	0.210384	0.2144	0.208439	0.208871	0.214312	0.216845	0.217453	0.217166	0.216223	0.218007	0.214451	0.211523	0.210956	0.212836	0.212319	0.21489	0.215139	0.213304	0.213489	0.215736	0.213567	0.214253	0.213044	0.214246	0.212455	0.213085	0.213214	0.212819	0.211793	0.212804	0.21293	0.21293	0.212095	0.211797	0.211611
3	TELO2_MOUSE|Q9DC40_S837	0.209172	0.211298	0.209588	0.217168	0.217019	0.216222	0.217124	0.215239	0.215785	0.215496	0.214096	0.20576	0.209081	0.209278	0.21446	0.215379	0.216184	0.213585	0.212347	0.21329	0.210339	0.211996	0.214545	0.218615	0.213571	0.216061	0.213458	0.213297	0.212784	0.213185	0.212231	0.212441	0.212862	0.211794	0.211433	0.212164	0.213523	0.212669	0.211734	0.213856	0.21455	0.210619	0.212603	0.21228
3	TEX2_MOUSE|Q6ZPJ0_S195	0.201412	0.212714	0.210187	0.212561	0.214913	0.21777	0.212218	0.21477	0.213086	0.212022	0.212032	0.203757	0.204108	0.209656	0.217969	0.223878	0.218817	0.216325	0.217499	0.217535	0.213879	0.211946	0.212535	0.218186	0.2183	0.213006	0.209997	0.212722	0.210115	0.212977	0.211539	0.210749	0.208747	0.214844	0.21526	0.211894	0.213245	0.212739	0.214384	0.21243	0.212518	0.21488	0.216588	0.212465
3	TGFA1_MOUSE|Q3UR70_S852	0.211468	0.211377	0.211363	0.215558	0.214258	0.213252	0.21563	0.210573	0.212725	0.211926	0.211117	0.21262	0.211908	0.215865	0.2155	0.216246	0.215953	0.213754	0.210084	0.214442	0.213769	0.21083	0.21275	0.213381	0.216126	0.212487	0.214735	0.213485	0.213884	0.21116	0.213859	0.21175	0.212421	0.213655	0.21463	0.21251	0.214944	0.211968	0.212737	0.214338	0.211059	0.213174	0.212662	0.212623
3	TGFA1_MOUSE|Q3UR70_S853	0.210768	0.209787	0.210818	0.215554	0.218284	0.21628	0.218719	0.211949	0.216307	0.214153	0.213885	0.210838	0.212168	0.20816	0.214238	0.214346	0.215823	0.21357	0.208466	0.212754	0.212693	0.210435	0.21275	0.213381	0.216126	0.212487	0.214735	0.213485	0.213884	0.21116	0.213859	0.21175	0.212421	0.213655	0.21463	0.21251	0.214944	0.211968	0.212737	0.214338	0.211059	0.213174	0.212662	0.212623
3	TIAM1_MOUSE|Q60610_S1437	0.205683	0.209745	0.207818	0.214812	0.215907	0.216458	0.212815	0.216	0.211567	0.212798	0.212166	0.206816	0.209206	0.213152	0.214323	0.21881	0.215242	0.216856	0.215242	0.217233	0.21353	0.213632	0.214904	0.214551	0.217037	0.21255	0.213151	0.213444	0.213987	0.21053	0.212904	0.212682	0.212955	0.213876	0.212045	0.21148	0.215178	0.213134	0.210854	0.215642	0.21241	0.211967	0.211175	0.213832
3	TIAM1_MOUSE|Q60610_S294	0.207783	0.211507	0.210198	0.210756	0.213933	0.21808	0.21961	0.212171	0.21147	0.215339	0.216947	0.212236	0.211002	0.204276	0.215215	0.217441	0.212312	0.211332	0.215782	0.217487	0.210122	0.21475	0.214904	0.214551	0.217037	0.21255	0.213151	0.213444	0.213987	0.21053	0.212904	0.212682	0.212955	0.213876	0.212045	0.21148	0.215178	0.213134	0.210854	0.215642	0.21241	0.211967	0.211175	0.213832
3	TISD_MOUSE|P23949_S127	0.208446	0.206126	0.205828	0.218093	0.217851	0.212892	0.213904	0.210612	0.211201	0.208575	0.207287	0.21245	0.213507	0.220742	0.216485	0.21679	0.219787	0.219593	0.211244	0.211886	0.213168	0.212984	0.208784	0.204968	0.214595	0.215667	0.213841	0.215818	0.217693	0.209801	0.209862	0.209703	0.209618	0.217079	0.212768	0.21443	0.21977	0.216167	0.217933	0.21809	0.208823	0.211363	0.211979	0.210925
3	TISD_MOUSE|P23949_T38	0.203497	0.207774	0.209383	0.212609	0.207468	0.212169	0.216111	0.212654	0.205064	0.210941	0.212199	0.210406	0.214727	0.210578	0.223018	0.228077	0.219559	0.219052	0.216832	0.212729	0.21106	0.212912	0.208784	0.204968	0.214595	0.215667	0.213841	0.215818	0.217693	0.209801	0.209862	0.209703	0.209618	0.217079	0.212768	0.21443	0.21977	0.216167	0.217933	0.21809	0.208823	0.211363	0.211979	0.210925
3	TLE3_MOUSE|Q08122_S217	0.209923	0.205954	0.204496	0.217627	0.221101	0.215918	0.215852	0.215149	0.218886	0.207987	0.210605	0.204335	0.208753	0.210972	0.213479	0.218516	0.22372	0.21828	0.20932	0.209538	0.213658	0.214927	0.215392	0.211906	0.213171	0.214429	0.215791	0.212673	0.212908	0.215255	0.218199	0.212484	0.215928	0.211577	0.210862	0.214469	0.210696	0.209076	0.21289	0.213106	0.211661	0.211008	0.212701	0.214016
3	TLE3_MOUSE|Q08122_S263_S267	0.212983	0.211636	0.206371	0.214657	0.214608	0.213215	0.213984	0.211765	0.214432	0.206286	0.205236	0.209532	0.209329	0.214541	0.216818	0.215484	0.222514	0.219497	0.21319	0.213467	0.217184	0.212843	0.215392	0.211906	0.213171	0.214429	0.215791	0.212673	0.212908	0.215255	0.218199	0.212484	0.215928	0.211577	0.210862	0.214469	0.210696	0.209076	0.21289	0.213106	0.211661	0.211008	0.212701	0.214016
3	TLN1_MOUSE|P26039_S1225	0.207847	0.200391	0.214898	0.213801	0.209512	0.216935	0.219961	0.213124	0.210153	0.217344	0.218219	0.212318	0.216755	0.211871	0.214954	0.214365	0.209294	0.21213	0.217942	0.214907	0.21047	0.212308	0.213851	0.211422	0.216646	0.21409	0.213447	0.214245	0.215369	0.21348	0.213402	0.214761	0.215045	0.213163	0.212576	0.213896	0.212691	0.213099	0.210489	0.212945	0.211743	0.211568	0.20989	0.212473
3	TM245_MOUSE|B1AZA5_S327	0.210421	0.21785	0.211774	0.214952	0.215314	0.215881	0.213138	0.215794	0.213445	0.213839	0.212536	0.206843	0.20763	0.206121	0.21375	0.21605	0.215126	0.214579	0.214595	0.214117	0.213412	0.212799	0.213578	0.219434	0.217403	0.215339	0.20942	0.214458	0.21232	0.213735	0.206867	0.213692	0.211531	0.213539	0.215314	0.207664	0.209801	0.215065	0.212182	0.212424	0.215414	0.215872	0.212934	0.211991
3	TM55A_MOUSE|Q9CZX7_S18	0.208096	0.212006	0.204671	0.211021	0.211389	0.224853	0.215938	0.212372	0.210953	0.213521	0.217473	0.214785	0.214317	0.201381	0.215026	0.216454	0.213247	0.210999	0.216166	0.218863	0.209362	0.216345	0.213797	0.213884	0.210019	0.213522	0.214518	0.219145	0.213231	0.213554	0.214255	0.215652	0.214114	0.214224	0.213836	0.205602	0.211524	0.21191	0.213483	0.212843	0.213106	0.212716	0.210318	0.214856
3	TNR6C_MOUSE|Q3UHC0_S1358	0.211792	0.199744	0.209909	0.211814	0.212508	0.21708	0.215648	0.2083	0.208253	0.212978	0.211902	0.214298	0.215097	0.214223	0.215753	0.220955	0.215682	0.218012	0.213473	0.21512	0.214126	0.212872	0.217003	0.208963	0.214816	0.212913	0.214139	0.212406	0.21282	0.214155	0.216146	0.211978	0.210258	0.210136	0.213033	0.215816	0.211206	0.2118	0.21558	0.213983	0.212513	0.211162	0.214559	0.214808
3	TOE1_MOUSE|Q9D2E2_S412	0.214627	0.202405	0.198243	0.214881	0.211055	0.216888	0.21976	0.217334	0.217531	0.216268	0.2178	0.215447	0.21604	0.199275	0.211024	0.210746	0.216799	0.216852	0.215344	0.209198	0.216285	0.214857	0.213677	0.212964	0.213549	0.21498	0.212822	0.211802	0.212334	0.213565	0.211618	0.21479	0.213725	0.21367	0.212283	0.21327	0.213573	0.215024	0.213351	0.212769	0.211145	0.212192	0.213855	0.213406
3	TOP2B_MOUSE|Q64511_S1537_S1539	0.203833	0.214161	0.205668	0.211243	0.217574	0.215249	0.213045	0.214429	0.216553	0.209556	0.211033	0.207768	0.211482	0.204673	0.217269	0.216159	0.218606	0.216849	0.214369	0.216948	0.217709	0.215265	0.212418	0.221016	0.217811	0.212238	0.213227	0.212614	0.209727	0.214661	0.213802	0.210465	0.209774	0.212235	0.213827	0.208657	0.212005	0.211365	0.214358	0.214989	0.214112	0.213148	0.214525	0.213085
3	TOPRS_MOUSE|Q80Z37_T206	0.209892	0.209591	0.208965	0.215285	0.212595	0.216632	0.215846	0.209501	0.210334	0.209964	0.214521	0.211313	0.214683	0.209563	0.218229	0.216261	0.214881	0.215998	0.218591	0.211151	0.212833	0.213324	0.215103	0.211608	0.215349	0.216666	0.211349	0.210662	0.21388	0.213338	0.207917	0.211395	0.212255	0.215452	0.214638	0.219345	0.213605	0.215323	0.214277	0.214407	0.211416	0.209872	0.209095	0.213117
3	TPC10_MOUSE|Q3TLI0_S708	0.205924	0.209037	0.209741	0.213331	0.21354	0.213773	0.214783	0.211126	0.214727	0.212803	0.21402	0.207742	0.208577	0.209681	0.218157	0.218616	0.214306	0.217082	0.217562	0.215022	0.214437	0.215826	0.213234	0.214518	0.211835	0.212291	0.213913	0.213381	0.211961	0.212384	0.211251	0.213945	0.212139	0.21493	0.214168	0.213791	0.213217	0.213205	0.213082	0.21336	0.213411	0.214346	0.212201	0.213805
3	TPC12_MOUSE|Q8K2L8_S309	0.21393	0.21115	0.211474	0.213075	0.214628	0.213191	0.214618	0.212479	0.216209	0.21709	0.215894	0.211473	0.208648	0.210796	0.213544	0.212341	0.211501	0.211657	0.215601	0.211759	0.214356	0.214787	0.212558	0.212532	0.213085	0.213688	0.214038	0.213485	0.2132	0.213001	0.213148	0.214516	0.211926	0.212854	0.21318	0.213702	0.213005	0.214127	0.213538	0.212928	0.212933	0.212715	0.213525	0.212714
3	TPC12_MOUSE|Q8K2L8_S314	0.207221	0.212737	0.212121	0.214238	0.220023	0.214645	0.214607	0.20987	0.21595	0.212634	0.210284	0.208731	0.21114	0.216425	0.213047	0.218462	0.215409	0.214523	0.209638	0.216142	0.210588	0.211471	0.212558	0.212532	0.213085	0.213688	0.214038	0.213485	0.2132	0.213001	0.213148	0.214516	0.211926	0.212854	0.21318	0.213702	0.213005	0.214127	0.213538	0.212928	0.212933	0.212715	0.213525	0.212714
3	TPRGL_MOUSE|Q9DBS2_T16	0.206754	0.210267	0.206144	0.214797	0.220432	0.217634	0.21577	0.212857	0.214224	0.213602	0.219423	0.20481	0.207258	0.208646	0.215239	0.222487	0.21823	0.212931	0.213176	0.213173	0.211148	0.210297	0.215376	0.212718	0.210924	0.212808	0.212466	0.211313	0.213037	0.213633	0.213834	0.213037	0.21342	0.214389	0.212844	0.216365	0.2133	0.212894	0.21482	0.213125	0.214021	0.210558	0.212885	0.212557
3	TPRN_MOUSE|A2AI08_S196	0.210558	0.211872	0.210606	0.21234	0.219223	0.220627	0.217889	0.209107	0.210757	0.21066	0.212317	0.20751	0.206668	0.208723	0.217622	0.224639	0.220278	0.217291	0.212701	0.211497	0.207651	0.208646	0.211801	0.209627	0.215991	0.212999	0.212418	0.213013	0.214301	0.213415	0.212928	0.213234	0.214183	0.213125	0.213153	0.214441	0.214827	0.214616	0.21438	0.212915	0.2122	0.21226	0.21323	0.211266
3	TR150_MOUSE|Q569Z6_S238_S243	0.213012	0.202871	0.212093	0.2071	0.212633	0.218983	0.217095	0.212953	0.214036	0.213184	0.21968	0.211939	0.211602	0.207001	0.212746	0.218218	0.218001	0.214118	0.215872	0.214443	0.209721	0.212295	0.212723	0.211234	0.216121	0.214694	0.21508	0.214796	0.214593	0.214019	0.214852	0.215136	0.215044	0.211956	0.211599	0.211533	0.211937	0.212155	0.211515	0.212521	0.212054	0.211816	0.211748	0.213166
3	TR150_MOUSE|Q569Z6_S55	0.208721	0.205777	0.204635	0.216746	0.216035	0.214239	0.217814	0.22115	0.215737	0.215203	0.21606	0.204095	0.206814	0.208354	0.21516	0.214487	0.21745	0.215802	0.21349	0.213326	0.215745	0.212502	0.212723	0.211234	0.216121	0.214694	0.21508	0.214796	0.214593	0.214019	0.214852	0.215136	0.215044	0.211956	0.211599	0.211533	0.211937	0.212155	0.211515	0.212521	0.212054	0.211816	0.211748	0.213166
3	TRA2A_MOUSE|Q6PFR5_S259	0.214607	0.210844	0.206122	0.213096	0.210986	0.211725	0.213254	0.214799	0.215337	0.213757	0.215137	0.206934	0.206632	0.208608	0.218528	0.212789	0.215042	0.214369	0.218422	0.212997	0.218924	0.216836	0.21381	0.212593	0.208605	0.214276	0.214272	0.212572	0.212982	0.213073	0.213038	0.214177	0.213698	0.212988	0.211606	0.215979	0.213478	0.214243	0.213372	0.211382	0.212514	0.213361	0.21437	0.213928
3	TREF1_MOUSE|Q8BXJ2_S764	0.207303	0.206352	0.209338	0.215854	0.212411	0.215535	0.211883	0.211548	0.21299	0.215291	0.2191	0.207412	0.213398	0.209236	0.215016	0.213014	0.207145	0.211118	0.222838	0.214968	0.220726	0.216969	0.213728	0.214885	0.214094	0.212621	0.211007	0.212171	0.212757	0.211226	0.21702	0.211532	0.211872	0.21616	0.212388	0.214976	0.21214	0.214643	0.212653	0.21264	0.208216	0.215107	0.212728	0.215655
3	TRI56_MOUSE|Q80VI1_T413	0.211959	0.216307	0.216245	0.214691	0.217251	0.213629	0.214585	0.211788	0.210627	0.213925	0.212529	0.210497	0.209439	0.215713	0.215469	0.219005	0.212995	0.214351	0.210518	0.210364	0.208707	0.209428	0.2125	0.210597	0.214475	0.214465	0.212861	0.213072	0.215166	0.213181	0.216468	0.215397	0.214203	0.212446	0.211957	0.212288	0.212912	0.213214	0.213291	0.214106	0.211711	0.212186	0.211342	0.212481
3	TRIP4_MOUSE|Q9QXN3_S404	0.20678	0.209866	0.213806	0.207743	0.212454	0.212029	0.212659	0.211249	0.213956	0.213856	0.215271	0.207458	0.205474	0.212278	0.216732	0.22166	0.217719	0.215714	0.219222	0.217895	0.211836	0.213919	0.212514	0.212263	0.215851	0.212118	0.210153	0.210585	0.211669	0.211528	0.210634	0.210741	0.209514	0.21532	0.213567	0.216733	0.214157	0.21588	0.21508	0.214816	0.213267	0.214816	0.213653	0.215333
3	TRIP4_MOUSE|Q9QXN3_T403	0.207649	0.209255	0.214427	0.208721	0.213851	0.212377	0.213273	0.213579	0.213638	0.213835	0.214944	0.206669	0.209002	0.211063	0.214779	0.221844	0.216779	0.215699	0.21503	0.217433	0.211943	0.214024	0.212514	0.212263	0.215851	0.212118	0.210153	0.210585	0.211669	0.211528	0.210634	0.210741	0.209514	0.21532	0.213567	0.216733	0.214157	0.21588	0.21508	0.214816	0.213267	0.214816	0.213653	0.215333
3	TRIPC_MOUSE|G5E870_S1063	0.206847	0.210389	0.209234	0.213777	0.212703	0.216185	0.213645	0.211842	0.201436	0.209316	0.214178	0.215837	0.205396	0.20853	0.219425	0.233278	0.221066	0.21692	0.207648	0.214072	0.215526	0.211107	0.212302	0.218622	0.215901	0.210773	0.210995	0.212979	0.210207	0.21276	0.211537	0.21025	0.209594	0.21359	0.214401	0.209268	0.213573	0.214355	0.21608	0.214981	0.214791	0.215239	0.214891	0.213042
3	TRMB_MOUSE|Q9Z120_S21	0.207533	0.213231	0.211493	0.217589	0.218522	0.214507	0.215647	0.211528	0.211864	0.207545	0.208298	0.204937	0.204758	0.212123	0.215439	0.22206	0.221984	0.221833	0.212207	0.214766	0.210282	0.210995	0.21324	0.214308	0.217789	0.214393	0.212599	0.21381	0.21372	0.21252	0.211996	0.216198	0.212204	0.214366	0.209475	0.208393	0.213624	0.214438	0.215333	0.213107	0.212444	0.21185	0.213662	0.210736
3	TRPV2_MOUSE|Q9WTR1_S37	0.211867	0.209715	0.215121	0.212309	0.217168	0.217677	0.218432	0.208789	0.215734	0.217485	0.216934	0.212119	0.209774	0.206641	0.214053	0.213633	0.212636	0.212168	0.21502	0.21181	0.209575	0.211241	0.213103	0.21904	0.212515	0.211176	0.212192	0.212877	0.212007	0.212317	0.21071	0.210978	0.212259	0.21467	0.215737	0.21025	0.213114	0.213626	0.212348	0.213506	0.215565	0.214514	0.214204	0.213519
3	TRPV2_MOUSE|Q9WTR1_S755	0.201747	0.210779	0.208676	0.211566	0.21524	0.209549	0.212383	0.221415	0.220785	0.222143	0.225627	0.205344	0.207172	0.200743	0.211899	0.209993	0.207097	0.213645	0.219936	0.218238	0.214451	0.219747	0.213103	0.21904	0.212515	0.211176	0.212192	0.212877	0.212007	0.212317	0.21071	0.210978	0.212259	0.21467	0.215737	0.21025	0.213114	0.213626	0.212348	0.213506	0.215565	0.214514	0.214204	0.213519
3	TSC2_MOUSE|Q61037_S1132	0.2068	0.212599	0.21019	0.217183	0.216857	0.215124	0.215733	0.216229	0.215105	0.218083	0.216094	0.208856	0.207278	0.210369	0.213707	0.213517	0.210011	0.212958	0.212862	0.21511	0.212637	0.212617	0.213563	0.216857	0.216695	0.213503	0.211293	0.211648	0.212312	0.213533	0.211997	0.213942	0.213451	0.212253	0.213275	0.21436	0.213471	0.214302	0.21204	0.210897	0.2132	0.213052	0.212003	0.212656
3	TSC2_MOUSE|Q61037_S1412	0.212094	0.21259	0.211917	0.213717	0.212084	0.213989	0.214015	0.21463	0.215019	0.21741	0.213917	0.211035	0.212038	0.211552	0.212908	0.2139	0.212142	0.212405	0.214124	0.213664	0.213836	0.21132	0.213563	0.216857	0.216695	0.213503	0.211293	0.211648	0.212312	0.213533	0.211997	0.213942	0.213451	0.212253	0.213275	0.21436	0.213471	0.214302	0.21204	0.210897	0.2132	0.213052	0.212003	0.212656
3	TXLNA_MOUSE|Q6PAM1_S522	0.209825	0.211046	0.212988	0.213227	0.216579	0.212841	0.214349	0.214902	0.217218	0.216015	0.214635	0.207428	0.207952	0.212791	0.212645	0.214771	0.213759	0.211154	0.213492	0.214499	0.214186	0.213809	0.214126	0.21129	0.214224	0.214955	0.2138	0.212298	0.213409	0.21333	0.213988	0.212688	0.212232	0.212881	0.210176	0.216929	0.212883	0.214881	0.212949	0.215047	0.211011	0.211096	0.212914	0.213192
3	UBP24_MOUSE|B1AY13_S1282	0.207004	0.210882	0.202045	0.212745	0.214795	0.217887	0.213934	0.211919	0.211329	0.214067	0.211311	0.211749	0.211509	0.212171	0.214394	0.221337	0.217871	0.213953	0.214258	0.218512	0.212175	0.213793	0.213629	0.217395	0.213453	0.212861	0.213116	0.212659	0.211451	0.212845	0.212089	0.213298	0.211099	0.212684	0.213361	0.213198	0.213523	0.213803	0.212897	0.213559	0.213122	0.214095	0.212812	0.213397
3	UBP24_MOUSE|B1AY13_S85	0.207192	0.212486	0.211244	0.209931	0.217264	0.212245	0.214177	0.208696	0.208364	0.210534	0.2112	0.210579	0.210602	0.210028	0.219514	0.222538	0.218851	0.218444	0.216872	0.212925	0.212613	0.2133	0.213629	0.217395	0.213453	0.212861	0.213116	0.212659	0.211451	0.212845	0.212089	0.213298	0.211099	0.212684	0.213361	0.213198	0.213523	0.213803	0.212897	0.213559	0.213122	0.214095	0.212812	0.213397
3	UBP8_MOUSE|Q80U87_S580	0.213055	0.213755	0.213796	0.213173	0.21626	0.214254	0.21492	0.211686	0.214174	0.214706	0.214276	0.211622	0.210601	0.208924	0.211584	0.213936	0.213116	0.213088	0.215306	0.212141	0.211696	0.214205	0.212051	0.212044	0.215358	0.213893	0.215554	0.213069	0.214029	0.213032	0.215867	0.213409	0.213514	0.211626	0.213336	0.212475	0.211964	0.211879	0.212771	0.213032	0.212056	0.212903	0.213174	0.213309
3	UBQL2_MOUSE|Q9QZM0_S25	0.212141	0.21113	0.208637	0.217667	0.218759	0.217706	0.21584	0.217007	0.218035	0.217424	0.215728	0.20743	0.204397	0.212192	0.212518	0.213281	0.212634	0.210245	0.212454	0.209037	0.211512	0.213918	0.213948	0.20994	0.215348	0.215661	0.215319	0.216154	0.216834	0.214702	0.214239	0.216179	0.215968	0.212048	0.209657	0.21491	0.213079	0.211988	0.210019	0.209434	0.211723	0.209845	0.210906	0.212209
3	UBXN1_MOUSE|Q922Y1_S187_S200	0.211918	0.203572	0.214163	0.211016	0.218825	0.219712	0.217111	0.210144	0.211336	0.211705	0.214443	0.212283	0.212881	0.211632	0.216249	0.217334	0.215434	0.215203	0.21056	0.211712	0.209963	0.212603	0.212537	0.20712	0.211951	0.213017	0.213593	0.214474	0.213911	0.213132	0.213508	0.213471	0.212626	0.213392	0.212959	0.215786	0.213103	0.214337	0.214474	0.212831	0.213022	0.213048	0.214425	0.213572
3	UBXN1_MOUSE|Q922Y1_S200	0.210826	0.206941	0.209629	0.213199	0.216983	0.217666	0.215258	0.211541	0.21079	0.211344	0.211627	0.210034	0.210427	0.212214	0.216874	0.220996	0.219132	0.216818	0.212145	0.211489	0.211179	0.212696	0.212537	0.20712	0.211951	0.213017	0.213593	0.214474	0.213911	0.213132	0.213508	0.213471	0.212626	0.213392	0.212959	0.215786	0.213103	0.214337	0.214474	0.212831	0.213022	0.213048	0.214425	0.213572
3	UH1BL_MOUSE|A2RSJ4_S1092	0.210559	0.212824	0.205957	0.218711	0.213754	0.22116	0.219156	0.208216	0.208102	0.212951	0.208046	0.21134	0.212961	0.213219	0.218745	0.221797	0.216839	0.213087	0.20926	0.214746	0.20951	0.208437	0.212521	0.212804	0.216289	0.213847	0.213781	0.213782	0.212905	0.212315	0.213181	0.213783	0.211952	0.21319	0.215165	0.213575	0.212047	0.213752	0.211949	0.212689	0.211467	0.213352	0.212467	0.213544
3	UH1BL_MOUSE|A2RSJ4_S418	0.208664	0.21349	0.212296	0.215837	0.217848	0.214365	0.21517	0.210512	0.204095	0.211813	0.210867	0.214914	0.214909	0.214122	0.216342	0.218188	0.214231	0.216334	0.210686	0.214252	0.211192	0.209753	0.212521	0.212804	0.216289	0.213847	0.213781	0.213782	0.212905	0.212315	0.213181	0.213783	0.211952	0.21319	0.215165	0.213575	0.212047	0.213752	0.211949	0.212689	0.211467	0.213352	0.212467	0.213544
3	UH1BL_MOUSE|A2RSJ4_S952	0.215661	0.20948	0.206843	0.215954	0.214567	0.22055	0.218566	0.212948	0.213811	0.214654	0.21861	0.212533	0.210598	0.211819	0.211907	0.215469	0.213421	0.210511	0.211286	0.212065	0.208547	0.210045	0.212521	0.212804	0.216289	0.213847	0.213781	0.213782	0.212905	0.212315	0.213181	0.213783	0.211952	0.21319	0.215165	0.213575	0.212047	0.213752	0.211949	0.212689	0.211467	0.213352	0.212467	0.213544
3	UH1BL_MOUSE|A2RSJ4_S988	0.21024	0.213003	0.21211	0.211649	0.215581	0.21375	0.21301	0.212334	0.21436	0.214588	0.214122	0.212704	0.212849	0.214001	0.212951	0.215785	0.212281	0.213089	0.210585	0.216475	0.211048	0.213772	0.212521	0.212804	0.216289	0.213847	0.213781	0.213782	0.212905	0.212315	0.213181	0.213783	0.211952	0.21319	0.215165	0.213575	0.212047	0.213752	0.211949	0.212689	0.211467	0.213352	0.212467	0.213544
3	V9GX91_MOUSE|V9GX91_S1588	0.209629	0.21347	0.212326	0.213873	0.215355	0.210871	0.210418	0.215141	0.216708	0.214788	0.215639	0.208612	0.207391	0.216401	0.211785	0.215166	0.215229	0.213024	0.21314	0.215776	0.211529	0.213815	0.213974	0.215933	0.213854	0.213405	0.211909	0.212826	0.211605	0.215466	0.218099	0.212885	0.211715	0.212042	0.210516	0.214531	0.214854	0.210349	0.214652	0.212339	0.209542	0.213284	0.214159	0.212279
3	VAC14_MOUSE|Q80WQ2_S517	0.199348	0.212263	0.215517	0.211561	0.219626	0.211949	0.214967	0.212634	0.219671	0.216468	0.218235	0.199612	0.207586	0.209334	0.212924	0.220758	0.210208	0.212784	0.213721	0.222961	0.213044	0.213562	0.214816	0.214253	0.216604	0.213996	0.214436	0.213823	0.214882	0.214209	0.213393	0.215024	0.213189	0.21197	0.213367	0.212823	0.211364	0.212387	0.212109	0.212226	0.211116	0.212478	0.210924	0.210912
3	VAPA_MOUSE|Q9WV55_S214	0.205471	0.210827	0.208051	0.212201	0.215781	0.214004	0.21038	0.211193	0.21129	0.209547	0.209365	0.209526	0.212399	0.208523	0.21695	0.21922	0.219907	0.219416	0.215841	0.217092	0.216641	0.215956	0.212407	0.215657	0.215502	0.210502	0.211735	0.213021	0.211004	0.212523	0.211902	0.212285	0.210171	0.213651	0.215339	0.2106	0.212504	0.214529	0.214906	0.214491	0.214708	0.215243	0.215614	0.211955
3	VIGLN_MOUSE|Q8VDJ3_S31	0.211192	0.207442	0.207052	0.213418	0.214176	0.210717	0.212748	0.212534	0.212365	0.212153	0.210861	0.211975	0.211073	0.21433	0.215943	0.215595	0.217773	0.217697	0.215578	0.213162	0.217047	0.215171	0.211711	0.211994	0.215125	0.213209	0.211928	0.21368	0.213508	0.212483	0.211947	0.214251	0.212795	0.214842	0.213534	0.214609	0.214053	0.215029	0.212776	0.212195	0.21359	0.212057	0.212244	0.212795
3	VIME_MOUSE|P20152_S18	0.203783	0.212823	0.211579	0.217846	0.220924	0.214049	0.21343	0.211996	0.211565	0.218406	0.21461	0.205784	0.20195	0.212718	0.217399	0.225165	0.212643	0.210907	0.21001	0.213308	0.213418	0.214775	0.213345	0.209324	0.212489	0.214085	0.213942	0.212191	0.215676	0.215144	0.214555	0.212902	0.214467	0.210705	0.213091	0.213748	0.212703	0.212236	0.21237	0.214227	0.213	0.212651	0.212828	0.214636
3	VIME_MOUSE|P20152_S21	0.212355	0.209462	0.205925	0.2127	0.2122	0.215018	0.214358	0.211672	0.212299	0.212494	0.211582	0.213285	0.211321	0.21285	0.214665	0.217509	0.217965	0.216121	0.213132	0.216594	0.212632	0.21393	0.213345	0.209324	0.212489	0.214085	0.213942	0.212191	0.215676	0.215144	0.214555	0.212902	0.214467	0.210705	0.213091	0.213748	0.212703	0.212236	0.21237	0.214227	0.213	0.212651	0.212828	0.214636
3	VIME_MOUSE|P20152_S22	0.205647	0.213643	0.212608	0.215332	0.218576	0.213602	0.213418	0.211491	0.212094	0.21726	0.215351	0.205581	0.204117	0.213337	0.216405	0.22255	0.21215	0.211046	0.213405	0.215336	0.212544	0.214066	0.213345	0.209324	0.212489	0.214085	0.213942	0.212191	0.215676	0.215144	0.214555	0.212902	0.214467	0.210705	0.213091	0.213748	0.212703	0.212236	0.21237	0.214227	0.213	0.212651	0.212828	0.214636
3	VIME_MOUSE|P20152_S25	0.210372	0.211896	0.211101	0.212126	0.215022	0.214487	0.214412	0.215381	0.214414	0.21321	0.215596	0.207849	0.208955	0.210618	0.214509	0.217043	0.21484	0.21035	0.214322	0.214001	0.214845	0.214784	0.213345	0.209324	0.212489	0.214085	0.213942	0.212191	0.215676	0.215144	0.214555	0.212902	0.214467	0.210705	0.213091	0.213748	0.212703	0.212236	0.21237	0.214227	0.213	0.212651	0.212828	0.214636
3	VIME_MOUSE|P20152_S51	0.209152	0.213275	0.211907	0.216917	0.216032	0.215958	0.214944	0.214927	0.212658	0.215412	0.214892	0.211075	0.211622	0.214507	0.212548	0.215412	0.209411	0.210256	0.21458	0.210011	0.212757	0.211898	0.213345	0.209324	0.212489	0.214085	0.213942	0.212191	0.215676	0.215144	0.214555	0.212902	0.214467	0.210705	0.213091	0.213748	0.212703	0.212236	0.21237	0.214227	0.213	0.212651	0.212828	0.214636
3	VIME_MOUSE|P20152_Y30	0.211212	0.213064	0.209037	0.215284	0.215551	0.215884	0.214002	0.206079	0.220477	0.216916	0.216965	0.212169	0.208242	0.210942	0.211983	0.21223	0.209719	0.211845	0.216334	0.214981	0.213759	0.213201	0.213345	0.209324	0.212489	0.214085	0.213942	0.212191	0.215676	0.215144	0.214555	0.212902	0.214467	0.210705	0.213091	0.213748	0.212703	0.212236	0.21237	0.214227	0.213	0.212651	0.212828	0.214636
3	VIME_MOUSE|P20152_Y38	0.214177	0.209135	0.211027	0.214216	0.217973	0.219594	0.213583	0.202368	0.219201	0.216575	0.215794	0.213338	0.209786	0.208526	0.213733	0.210354	0.213114	0.213499	0.216332	0.212744	0.212282	0.212332	0.213345	0.209324	0.212489	0.214085	0.213942	0.212191	0.215676	0.215144	0.214555	0.212902	0.214467	0.210705	0.213091	0.213748	0.212703	0.212236	0.21237	0.214227	0.213	0.212651	0.212828	0.214636
3	VIP1_MOUSE|A2ARP1_S959	0.209587	0.213802	0.206108	0.211667	0.216706	0.21324	0.213912	0.212693	0.216236	0.2142	0.215381	0.213872	0.21419	0.212745	0.213261	0.213614	0.213309	0.212833	0.211759	0.215542	0.212979	0.212536	0.21347	0.214707	0.215285	0.213547	0.212198	0.214456	0.214514	0.211882	0.21302	0.213343	0.215281	0.212853	0.213319	0.2118	0.213408	0.212053	0.213121	0.212327	0.214192	0.21424	0.211121	0.210192
3	VP26B_MOUSE|Q8C0E2_S319	0.208028	0.212726	0.211689	0.214355	0.217258	0.215428	0.215238	0.211965	0.213114	0.212371	0.211903	0.212112	0.212476	0.216888	0.214289	0.21788	0.213893	0.214224	0.211733	0.212242	0.208595	0.21171	0.211466	0.213446	0.218542	0.212176	0.214655	0.213654	0.212551	0.213368	0.213816	0.213895	0.213124	0.213298	0.213259	0.215632	0.211051	0.214323	0.210309	0.212341	0.212799	0.212283	0.211647	0.212637
[truncated: 7,374 more rows]

## Sheet: KGG ALL_DATA
Cluster	Identifier	WT Uninfected 1 KGG	WT Uninfected 3 KGG	WT Uninfected 4 KGG	WT Early 1 KGG	WT Early 2 KGG	WT Early 3 KGG	WT Early 4 KGG	WT Late 1 KGG	WT Late 2 KGG	WT Late 3 KGG	WT Late 4 KGG	KO Uninfected 1 KGG	KO Uninfected 2 KGG	KO Uninfected 3 KGG	KO Early 1 KGG	KO Early 2 KGG	KO Early 3 KGG	KO Early 4 KGG	KO Late 1 KGG	KO Late 2 KGG	KO Late 3 KGG	KO Late 4 KGG	WT Uninfected 1 Global	WT Uninfected 3 Global	WT Uninfected 4 Global	WT Early 1 Global	WT Early 2 Global	WT Early 3 Global	WT Early 4 Global	WT Late 1 Global	WT Late 2 Global	WT Late 3 Global	WT Late 4 Global	KO Uninfected 1 Global	KO Uninfected 2 Global	KO Uninfected 3 Global	KO Early 1 Global	KO Early 2 Global	KO Early 3 Global	KO Early 4 Global	KO Late 1 Global	KO Late 2 Global	KO Late 3 Global	KO Late 4 Global
[truncated: 3,514 more rows]
