# Supplementary material for: Multiplexed proteomics of autophagy-deficient murine macrophages reveals enhanced antimicrobial immunity via the oxidative stress response
Source: eLife. 2021 Jun 4;10:e62320. doi: 10.7554/eLife.62320 (PMC8177894; doi:10.7554/eLife.62320)
Supplement: Supplementary file 4. [file elife-62320-supp4.xlsx]

## Sheet: globalproteome_KO_U-WT_U
Overlap Results
Collection(s):	H
# overlaps shown:	10
# genesets in collections:	50
# genes in comparison (n):	55
# genes in universe (N):	40071
Gene Set Name	# Genes in Gene Set (K)	Description	# Genes in Overlap (k)	k/K	p-value	FDR q-value
HALLMARK_REACTIVE_OXYGEN_SPECIES_PATHWAY	49	Genes up-regulated by reactive oxigen species (ROS).	7	0.1429	5.07e-13	2.54e-11
HALLMARK_INTERFERON_GAMMA_RESPONSE	200	Genes up-regulated in response to IFNG [GeneID=3458].	9	0.045	8.36e-12	2.09e-10
HALLMARK_INTERFERON_ALPHA_RESPONSE	97	Genes up-regulated in response to alpha interferon proteins.	5	0.0515	2.37e-07	3.95e-06
HALLMARK_XENOBIOTIC_METABOLISM	200	Genes encoding proteins involved in processing of drugs and other xenobiotics.	6	0.03	3.39e-07	4.24e-06
HALLMARK_HEME_METABOLISM	200	Genes involved in metabolism of heme (a cofactor consisting of iron and porphyrin) and erythroblast differentiation.	4	0.02	0.000168	0.0014
HALLMARK_TNFA_SIGNALING_VIA_NFKB	200	Genes regulated by NF-kB in response to TNF [GeneID=7124].	4	0.02	0.000168	0.0014
HALLMARK_PEROXISOME	104	Genes encoding components of peroxisome.	3	0.0288	0.000404	0.00289
HALLMARK_BILE_ACID_METABOLISM	112	Genes involve in metabolism of bile acids and salts.	3	0.0268	0.000502	0.00314
HALLMARK_FATTY_ACID_METABOLISM	158	Genes encoding proteins involved in metabolism of fatty acids.	3	0.019	0.00136	0.00679
HALLMARK_UV_RESPONSE_UP	158	Genes up-regulated in response to ultraviolet (UV) radiation.	3	0.019	0.00136	0.00679
Gene/Gene Set Overlap Matrix
Entrez Gene Id	Gene Symbol	Gene Description	HALLMARK_REACTIVE_OXYGEN_SPECIES_PATHWAY	HALLMARK_INTERFERON_GAMMA_RESPONSE	HALLMARK_INTERFERON_ALPHA_RESPONSE	HALLMARK_XENOBIOTIC_METABOLISM	HALLMARK_HEME_METABOLISM	HALLMARK_TNFA_SIGNALING_VIA_NFKB	HALLMARK_PEROXISOME	HALLMARK_BILE_ACID_METABOLISM	HALLMARK_FATTY_ACID_METABOLISM	HALLMARK_UV_RESPONSE_UP
847	CAT	catalase [Source:HGNC Symbol;Acc:HGNC:1516]	HALLMARK_REACTIVE_OXYGEN_SPECIES_PATHWAY			HALLMARK_XENOBIOTIC_METABOLISM	HALLMARK_HEME_METABOLISM		HALLMARK_PEROXISOME	HALLMARK_BILE_ACID_METABOLISM
1728	NQO1	NAD(P)H quinone dehydrogenase 1 [Source:HGNC Symbol;Acc:HGNC:2874]	HALLMARK_REACTIVE_OXYGEN_SPECIES_PATHWAY			HALLMARK_XENOBIOTIC_METABOLISM
2730	GCLM	glutamate-cysteine ligase modifier subunit [Source:HGNC Symbol;Acc:HGNC:4312]	HALLMARK_REACTIVE_OXYGEN_SPECIES_PATHWAY				HALLMARK_HEME_METABOLISM			HALLMARK_BILE_ACID_METABOLISM
5052	PRDX1	peroxiredoxin 1 [Source:HGNC Symbol;Acc:HGNC:9352]	HALLMARK_REACTIVE_OXYGEN_SPECIES_PATHWAY						HALLMARK_PEROXISOME
9588	PRDX6	peroxiredoxin 6 [Source:HGNC Symbol;Acc:HGNC:16753]	HALLMARK_REACTIVE_OXYGEN_SPECIES_PATHWAY								HALLMARK_FATTY_ACID_METABOLISM
140809	SRXN1	sulfiredoxin 1 [Source:HGNC Symbol;Acc:HGNC:16132]	HALLMARK_REACTIVE_OXYGEN_SPECIES_PATHWAY
4257	MGST1	microsomal glutathione S-transferase 1 [Source:HGNC Symbol;Acc:HGNC:7061]	HALLMARK_REACTIVE_OXYGEN_SPECIES_PATHWAY
3433	IFIT2	interferon induced protein with tetratricopeptide repeats 2 [Source:HGNC Symbol;Acc:HGNC:5409]		HALLMARK_INTERFERON_GAMMA_RESPONSE	HALLMARK_INTERFERON_ALPHA_RESPONSE			HALLMARK_TNFA_SIGNALING_VIA_NFKB
3437	IFIT3	interferon induced protein with tetratricopeptide repeats 3 [Source:HGNC Symbol;Acc:HGNC:5411]		HALLMARK_INTERFERON_GAMMA_RESPONSE	HALLMARK_INTERFERON_ALPHA_RESPONSE
3959	LGALS3BP	galectin 3 binding protein [Source:HGNC Symbol;Acc:HGNC:6564]		HALLMARK_INTERFERON_GAMMA_RESPONSE	HALLMARK_INTERFERON_ALPHA_RESPONSE
8638	OASL	2'-5'-oligoadenylate synthetase like [Source:HGNC Symbol;Acc:HGNC:8090]		HALLMARK_INTERFERON_GAMMA_RESPONSE	HALLMARK_INTERFERON_ALPHA_RESPONSE
9636	ISG15	ISG15 ubiquitin like modifier [Source:HGNC Symbol;Acc:HGNC:4053]		HALLMARK_INTERFERON_GAMMA_RESPONSE	HALLMARK_INTERFERON_ALPHA_RESPONSE
2643	GCH1	GTP cyclohydrolase 1 [Source:HGNC Symbol;Acc:HGNC:4193]		HALLMARK_INTERFERON_GAMMA_RESPONSE		HALLMARK_XENOBIOTIC_METABOLISM		HALLMARK_TNFA_SIGNALING_VIA_NFKB				HALLMARK_UV_RESPONSE_UP
3105	HLA-A	major histocompatibility complex, class I, A [Source:HGNC Symbol;Acc:HGNC:4931]		HALLMARK_INTERFERON_GAMMA_RESPONSE
3106	HLA-B	major histocompatibility complex, class I, B [Source:HGNC Symbol;Acc:HGNC:4932]		HALLMARK_INTERFERON_GAMMA_RESPONSE
81030	ZBP1	Z-DNA binding protein 1 [Source:HGNC Symbol;Acc:HGNC:16176]		HALLMARK_INTERFERON_GAMMA_RESPONSE
645	BLVRB	biliverdin reductase B [Source:HGNC Symbol;Acc:HGNC:1063]				HALLMARK_XENOBIOTIC_METABOLISM	HALLMARK_HEME_METABOLISM
211	ALAS1	5'-aminolevulinate synthase 1 [Source:HGNC Symbol;Acc:HGNC:396]				HALLMARK_XENOBIOTIC_METABOLISM						HALLMARK_UV_RESPONSE_UP
383	ARG1	arginase 1 [Source:HGNC Symbol;Acc:HGNC:663]				HALLMARK_XENOBIOTIC_METABOLISM
23657	SLC7A11	solute carrier family 7 member 11 [Source:HGNC Symbol;Acc:HGNC:11059]					HALLMARK_HEME_METABOLISM
8878	SQSTM1	sequestosome 1 [Source:HGNC Symbol;Acc:HGNC:11280]						HALLMARK_TNFA_SIGNALING_VIA_NFKB				HALLMARK_UV_RESPONSE_UP
24145	PANX1	pannexin 1 [Source:HGNC Symbol;Acc:HGNC:8599]						HALLMARK_TNFA_SIGNALING_VIA_NFKB
25824	PRDX5	peroxiredoxin 5 [Source:HGNC Symbol;Acc:HGNC:9355]							HALLMARK_PEROXISOME	HALLMARK_BILE_ACID_METABOLISM
3248	HPGD	15-hydroxyprostaglandin dehydrogenase [Source:HGNC Symbol;Acc:HGNC:5154]									HALLMARK_FATTY_ACID_METABOLISM
874	CBR3	carbonyl reductase 3 [Source:HGNC Symbol;Acc:HGNC:1549]									HALLMARK_FATTY_ACID_METABOLISM
3690	ITGB3	integrin subunit beta 3 [Source:HGNC Symbol;Acc:HGNC:6156]
1893	ECM1	extracellular matrix protein 1 [Source:HGNC Symbol;Acc:HGNC:3153]
8572	PDLIM4	PDZ and LIM domain 4 [Source:HGNC Symbol;Acc:HGNC:16501]
6280	S100A9	S100 calcium binding protein A9 [Source:HGNC Symbol;Acc:HGNC:10499]
445	ASS1	argininosuccinate synthase 1 [Source:HGNC Symbol;Acc:HGNC:758]
4288	MKI67	marker of proliferation Ki-67 [Source:HGNC Symbol;Acc:HGNC:7107]
10643	IGF2BP3	insulin like growth factor 2 mRNA binding protein 3 [Source:HGNC Symbol;Acc:HGNC:28868]
199	AIF1	allograft inflammatory factor 1 [Source:HGNC Symbol;Acc:HGNC:352]
23306	NEMP1	nuclear envelope integral membrane protein 1 [Source:HGNC Symbol;Acc:HGNC:29001]
23569	PADI4	peptidyl arginine deiminase 4 [Source:HGNC Symbol;Acc:HGNC:18368]
259266	ASPM	assembly factor for spindle microtubules [Source:HGNC Symbol;Acc:HGNC:19048]
2621	GAS6	growth arrest specific 6 [Source:HGNC Symbol;Acc:HGNC:4168]
4077	NBR1	NBR1 autophagy cargo receptor [Source:HGNC Symbol;Acc:HGNC:6746]
4332	MNDA	myeloid cell nuclear differentiation antigen [Source:HGNC Symbol;Acc:HGNC:7183]
445815	PALM2AKAP2	PALM2 and AKAP2 fusion [Source:HGNC Symbol;Acc:HGNC:33529]
51131	PHF11	PHD finger protein 11 [Source:HGNC Symbol;Acc:HGNC:17024]
5272	SERPINB9	serpin family B member 9 [Source:HGNC Symbol;Acc:HGNC:8955]
53831	GPR84	G protein-coupled receptor 84 [Source:HGNC Symbol;Acc:HGNC:4535]
55054	ATG16L1	autophagy related 16 like 1 [Source:HGNC Symbol;Acc:HGNC:21498]
57412	AS3MT	arsenite methyltransferase [Source:HGNC Symbol;Acc:HGNC:17452]
57590	WDFY1	WD repeat and FYVE domain containing 1 [Source:HGNC Symbol;Acc:HGNC:20451]
57658	CALCOCO1	calcium binding and coiled-coil domain 1 [Source:HGNC Symbol;Acc:HGNC:29306]
634	CEACAM1	CEA cell adhesion molecule 1 [Source:HGNC Symbol;Acc:HGNC:1814]
6556	SLC11A1	solute carrier family 11 member 1 [Source:HGNC Symbol;Acc:HGNC:10907]
6614	SIGLEC1	sialic acid binding Ig like lectin 1 [Source:HGNC Symbol;Acc:HGNC:11127]
730249	ACOD1	aconitate decarboxylase 1 [Source:HGNC Symbol;Acc:HGNC:33904]
79589	RNF128	ring finger protein 128 [Source:HGNC Symbol;Acc:HGNC:21153]
79668	PARP8	poly(ADP-ribose) polymerase family member 8 [Source:HGNC Symbol;Acc:HGNC:26124]
84969	TOX2	TOX high mobility group box family member 2 [Source:HGNC Symbol;Acc:HGNC:16095]
9403	SELENOF	selenoprotein F [Source:HGNC Symbol;Acc:HGNC:17705]

## Sheet: input
Protein	Condition Comparison	log2FC	SE	DF	pvalue	adj.pvalue	log10p	abslog2FC	Column cluster IDs (log2FC per Condition Comparison and Protein) - Embedded	Row cluster IDs (log2FC per Condition Comparison and Protein) - Embedded	Row cluster IDs (Ontology Terms and Proteins clustered by their enrichment Oddsratios) - Embedded	BinBySpecificLimits([abslog2FC],1)
A16L1_MOUSE|Q8C0J2	KO_Uninfected-WT_Uninfected	-2.19746	0.125144	18.802	0	0	12.3915	2.19746				1.00 < x			A16L1_MOUSE
A2A472_MOUSE|A2A472	KO_Uninfected-WT_Uninfected	-1.3927	0.186933	18.802	0	0.0001	6.29523	1.3927				1.00 < x			A2A472_MOUSE
AIF1_MOUSE|O70200	KO_Uninfected-WT_Uninfected	1.1082	0.191583	18.802	0	0.0011	4.82908	1.1082				1.00 < x			AIF1_MOUSE
AKAP2_MOUSE|O54931	KO_Uninfected-WT_Uninfected	-1.12982	0.176073	18.802	0	0.0005	5.40441	1.12982				1.00 < x			AKAP2_MOUSE
ARGI1_MOUSE|Q61176	KO_Uninfected-WT_Uninfected	1.65368	0.294027	18.802	0	0.0013	4.67986	1.65368				1.00 < x			ARGI1_MOUSE
AS3MT_MOUSE|Q91WU5	KO_Uninfected-WT_Uninfected	1.04475	0.290365	18.802	0.0019	0.0229	2.71158	1.04475				1.00 < x			AS3MT_MOUSE
ASPM_MOUSE|Q8CJ27	KO_Uninfected-WT_Uninfected	-1.05803	0.117188	18.802	0	0	7.53664	1.05803				1.00 < x			ASPM_MOUSE
ASSY_MOUSE|P16460	KO_Uninfected-WT_Uninfected	1.80768	0.195019	18.802	0	0	7.71398	1.80768				1.00 < x			ASSY_MOUSE
BLVRB_MOUSE|Q923D2	KO_Uninfected-WT_Uninfected	1.02896	0.121164	18.802	0	0	7.13056	1.02896				1.00 < x			BLVRB_MOUSE
CACO1_MOUSE|Q8CGU1	KO_Uninfected-WT_Uninfected	1.11482	0.0952428	18.8021	0	0	9.34961	1.11482				1.00 < x			CACO1_MOUSE
CATA_MOUSE|P24270	KO_Uninfected-WT_Uninfected	1.1569	0.092692	18.8021	0	0	9.81691	1.1569				1.00 < x			CATA_MOUSE
CBR3_MOUSE|Q8K354	KO_Uninfected-WT_Uninfected	1.0229	0.0940979	18.8021	0	0	8.81981	1.0229				1.00 < x			CBR3_MOUSE
CEAM1_MOUSE|P31809	KO_Uninfected-WT_Uninfected	1.05837	0.233461	18.802	0.0002	0.0058	3.63303	1.05837				1.00 < x			CEAM1_MOUSE
ECM1_MOUSE|Q61508	KO_Uninfected-WT_Uninfected	1.17141	0.203437	18.802	0	0.0011	4.80461	1.17141				1.00 < x			ECM1_MOUSE
F6VRP8_MOUSE|F6VRP8	KO_Uninfected-WT_Uninfected	1.55049	0.248827	18.802	0	0.0006	5.23787	1.55049				1.00 < x			F6VRP8_MOUSE
GAS6_MOUSE|Q61592	KO_Uninfected-WT_Uninfected	-1.15905	0.217834	18.802	0	0.0019	4.39373	1.15905				1.00 < x			GAS6_MOUSE
GCH1_MOUSE|Q05915	KO_Uninfected-WT_Uninfected	1.14143	0.128173	18.802	0	0	7.44478	1.14143				1.00 < x			GCH1_MOUSE
GPR84_MOUSE|Q8CIM5	KO_Uninfected-WT_Uninfected	1.01616	0.172254	18.802	0	0.0009	4.93512	1.01616				1.00 < x			GPR84_MOUSE
GSH0_MOUSE|O09172	KO_Uninfected-WT_Uninfected	1.15715	0.135453	18.802	0	0	7.16945	1.15715				1.00 < x			GSH0_MOUSE
HA13_MOUSE|P14426	KO_Uninfected-WT_Uninfected	1.33618	0.172939	18.802	0	0.0001	6.52262	1.33618				1.00 < x			HA13_MOUSE
HA18_MOUSE|P14430	KO_Uninfected-WT_Uninfected	1.1752	0.254706	18.802	0.0002	0.0052	3.71181	1.1752				1.00 < x			HA18_MOUSE
HA1B_MOUSE|P01901	KO_Uninfected-WT_Uninfected	1.16386	0.238638	18.802	0.0001	0.0035	3.96788	1.16386				1.00 < x			HA1B_MOUSE
HEM1_MOUSE|Q8VC19	KO_Uninfected-WT_Uninfected	1.07259	0.211116	18.802	0.0001	0.0027	4.1642	1.07259				1.00 < x			HEM1_MOUSE
IF2B3_MOUSE|Q9CPN8	KO_Uninfected-WT_Uninfected	-1.82433	0.425663	18.802	0.0004	0.0084	3.38992	1.82433				1.00 < x			IF2B3_MOUSE
IFI5B_MOUSE|P0DOV1	KO_Uninfected-WT_Uninfected	1.01689	0.219504	18.802	0.0002	0.005	3.73011	1.01689				1.00 < x			IFI5B_MOUSE
IFIT1_MOUSE|Q64282	KO_Uninfected-WT_Uninfected	1.20025	0.171907	18.802	0	0.0002	5.89934	1.20025				1.00 < x			IFIT1_MOUSE
IFIT2_MOUSE|Q64112	KO_Uninfected-WT_Uninfected	1.12248	0.212643	18.802	0	0.002	4.3537	1.12248				1.00 < x			IFIT2_MOUSE
IFIT3_MOUSE|Q64345	KO_Uninfected-WT_Uninfected	1.17926	0.213544	18.802	0	0.0014	4.58426	1.17926				1.00 < x			IFIT3_MOUSE
IFIX_MOUSE|Q8BV49	KO_Uninfected-WT_Uninfected	1.17812	0.248949	18.802	0.0001	0.0044	3.82734	1.17812				1.00 < x			IFIX_MOUSE
IFIXL_MOUSE|Q504N7	KO_Uninfected-WT_Uninfected	1.22643	0.246252	18.802	0.0001	0.003	4.06772	1.22643				1.00 < x			IFIXL_MOUSE
IIGP1_MOUSE|Q9QZ85	KO_Uninfected-WT_Uninfected	1.47217	0.273573	18.802	0	0.0017	4.45109	1.47217				1.00 < x			IIGP1_MOUSE
IRG1_MOUSE|P54987	KO_Uninfected-WT_Uninfected	2.27922	0.269741	18.802	0	0	7.09758	2.27922				1.00 < x			IRG1_MOUSE
ISG15_MOUSE|Q64339	KO_Uninfected-WT_Uninfected	1.08163	0.216413	18.802	0.0001	0.003	4.08472	1.08163				1.00 < x			ISG15_MOUSE
ITB3_MOUSE|O54890	KO_Uninfected-WT_Uninfected	-1.02534	0.107612	18.802	0	0	7.9013	1.02534				1.00 < x			ITB3_MOUSE
KI67_MOUSE|E9PVX6	KO_Uninfected-WT_Uninfected	-1.09222	0.218806	18.802	0.0001	0.003	4.07868	1.09222				1.00 < x			KI67_MOUSE
MGST1_MOUSE|Q91VS7	KO_Uninfected-WT_Uninfected	1.32173	0.184864	18.802	0	0.0002	6.0427	1.32173				1.00 < x			MGST1_MOUSE
NBR1_MOUSE|P97432	KO_Uninfected-WT_Uninfected	1.129	0.146313	18.802	0	0.0001	6.51448	1.129				1.00 < x			NBR1_MOUSE
NEMP1_MOUSE|Q6ZQE4	KO_Uninfected-WT_Uninfected	-1.01315	0.17206	18.802	0	0.0009	4.92511	1.01315				1.00 < x			NEMP1_MOUSE
NQO1_MOUSE|Q64669	KO_Uninfected-WT_Uninfected	1.21383	0.15525	18.802	0	0.0001	6.5976	1.21383				1.00 < x			NQO1_MOUSE
NRAM1_MOUSE|P41251	KO_Uninfected-WT_Uninfected	1.23215	0.193517	18.802	0	0.0005	5.36005	1.23215				1.00 < x			NRAM1_MOUSE
OASL1_MOUSE|Q8VI94	KO_Uninfected-WT_Uninfected	1.40002	0.194723	18.802	0	0.0002	6.07667	1.40002				1.00 < x			OASL1_MOUSE
PADI4_MOUSE|Q9Z183	KO_Uninfected-WT_Uninfected	1.32576	0.355456	18.802	0.0014	0.019	2.84126	1.32576				1.00 < x			PADI4_MOUSE
PANX1_MOUSE|Q9JIP4	KO_Uninfected-WT_Uninfected	1.04217	0.14022	18.802	0	0.0001	6.28036	1.04217				1.00 < x			PANX1_MOUSE
PARP8_MOUSE|Q3UD82	KO_Uninfected-WT_Uninfected	-1.00886	0.195247	18.802	0.0001	0.0024	4.24713	1.00886				1.00 < x			PARP8_MOUSE
PDLI4_MOUSE|P70271	KO_Uninfected-WT_Uninfected	1.23005	0.135481	18.802	0	0	7.57424	1.23005				1.00 < x			PDLI4_MOUSE
PGDH_MOUSE|Q8VCC1	KO_Uninfected-WT_Uninfected	-1.15451	0.216949	18.802	0	0.0019	4.39447	1.15451				1.00 < x			PGDH_MOUSE
PH11A_MOUSE|Q8BVM9	KO_Uninfected-WT_Uninfected	1.70542	0.204475	18.802	0	0	7.01269	1.70542				1.00 < x			PH11A_MOUSE
PHF11_MOUSE|A6H5X4	KO_Uninfected-WT_Uninfected	1.00466	0.193053	18.802	0.0001	0.0022	4.2825	1.00466				1.00 < x			PHF11_MOUSE
PRDX1_MOUSE|P35700	KO_Uninfected-WT_Uninfected	1.05756	0.144766	18.802	0	0.0001	6.1741	1.05756				1.00 < x			PRDX1_MOUSE
PRDX5_MOUSE|P99029	KO_Uninfected-WT_Uninfected	1.13137	0.132546	18.802	0	0	7.164	1.13137				1.00 < x			PRDX5_MOUSE
PRDX6_MOUSE|O08709	KO_Uninfected-WT_Uninfected	1.14138	0.125973	18.802	0	0	7.56042	1.14138				1.00 < x			PRDX6_MOUSE
Q6GT24_MOUSE|Q6GT24	KO_Uninfected-WT_Uninfected	1.09509	0.112522	18.802	0	0	8.04657	1.09509				1.00 < x			Q6GT24_MOUSE
Q8HWB2_MOUSE|Q8HWB2	KO_Uninfected-WT_Uninfected	1.01209	0.214715	18.802	0.0002	0.0045	3.80909	1.01209				1.00 < x			Q8HWB2_MOUSE
Q9DAV6_MOUSE|Q9DAV6	KO_Uninfected-WT_Uninfected	1.37606	0.106109	18.802	0	0	10.0986	1.37606				1.00 < x			Q9DAV6_MOUSE
Q9Z0I7_MOUSE|Q9Z0I7	KO_Uninfected-WT_Uninfected	2.36197	0.374612	18.802	0	0.0006	5.30444	2.36197				1.00 < x			Q9Z0I7_MOUSE
RN128_MOUSE|Q9D304	KO_Uninfected-WT_Uninfected	1.46984	0.409769	18.802	0.002	0.0232	2.70067	1.46984				1.00 < x			RN128_MOUSE
S10A9_MOUSE|P31725	KO_Uninfected-WT_Uninfected	1.09253	0.326847	18.802	0.0035	0.0328	2.46115	1.09253				1.00 < x			S10A9_MOUSE
SAA3_MOUSE|P04918	KO_Uninfected-WT_Uninfected	1.98727	0.35147	18.802	0	0.0012	4.70783	1.98727				1.00 < x			SAA3_MOUSE
SEP15_MOUSE|Q9ERR7	KO_Uninfected-WT_Uninfected	1.08442	0.294757	18.802	0.0016	0.0205	2.79129	1.08442				1.00 < x			SEP15_MOUSE
SN_MOUSE|Q62230	KO_Uninfected-WT_Uninfected	1.33077	0.177669	18.802	0	0.0001	6.32842	1.33077				1.00 < x			SN_MOUSE
SQSTM_MOUSE|Q64337	KO_Uninfected-WT_Uninfected	2.31433	0.11596	18.802	0	0	13.3863	2.31433				1.00 < x			SQSTM_MOUSE
SRXN1_MOUSE|Q9D975	KO_Uninfected-WT_Uninfected	1.15789	0.129307	18.802	0	0	7.48159	1.15789				1.00 < x			SRXN1_MOUSE
TPX_SHIFL|P0A865	KO_Uninfected-WT_Uninfected	1.5664	0.294071	18.802	0	0.0019	4.39923	1.5664				1.00 < x			TPX_SHIFL
WDFY1_MOUSE|E9Q4P1	KO_Uninfected-WT_Uninfected	-2.53668	0.308545	18.802	0	0	6.91935	2.53668				1.00 < x			WDFY1_MOUSE
XCT_MOUSE|Q9WTR6	KO_Uninfected-WT_Uninfected	1.66794	0.223436	18.802	0	0.0001	6.30747	1.66794				1.00 < x			XCT_MOUSE
ZBP1_MOUSE|Q9QY24	KO_Uninfected-WT_Uninfected	1.61869	0.306714	18.802	0	0.002	4.35257	1.61869				1.00 < x			ZBP1_MOUSE
