# Supplementary material for: Multiplexed proteomics of autophagy-deficient murine macrophages reveals enhanced antimicrobial immunity via the oxidative stress response
Source: eLife. 2021 Jun 4;10:e62320. doi: 10.7554/eLife.62320 (PMC8177894; doi:10.7554/eLife.62320)
Supplement: Supplementary file 5. [file elife-62320-supp5.xlsx]

## Sheet: globalproteome
Mixture	TechRepMixture	Run	Channel	ProteinName	Abundance	BioReplicate	Condition	Charge	PeptideSequence	PSM	Intensity	FeatureType	intensity	intensitySum	intensityRatioWithinPlex
OBJ38812_TMT10_p2.txt	1	OBJ38812_TMT10_p2.txt_1	127N	1433B_MOUSE|Q9CQV8	17.0976	KO_Early_3	KO_Early	NA	Model	NA	NA	Model	140241	1.74952e+06	0.0801597
OBJ38812_TMT10_p2.txt	1	OBJ38812_TMT10_p2.txt_1	130N	1433B_MOUSE|Q9CQV8	17.0639	KO_Early_4	KO_Early	NA	Model	NA	NA	Model	137007	1.74952e+06	0.078311
OBJ38812_TMT10_p2.txt	1	OBJ38812_TMT10_p2.txt_1	128N	1433B_MOUSE|Q9CQV8	17.0689	KO_Late_3	KO_Late	NA	Model	NA	NA	Model	137487	1.74952e+06	0.0785852
OBJ38812_TMT10_p2.txt	1	OBJ38812_TMT10_p2.txt_1	131N	1433B_MOUSE|Q9CQV8	17.1092	KO_Late_4	KO_Late	NA	Model	NA	NA	Model	141376	1.74952e+06	0.0808084
OBJ38812_TMT10_p2.txt	1	OBJ38812_TMT10_p2.txt_1	129N	1433B_MOUSE|Q9CQV8	17.3939	KO_Uninfect_3	KO_Uninfect	NA	Model	NA	NA	Model	172224	1.74952e+06	0.0984404
OBJ38812_TMT10_p2.txt	1	OBJ38812_TMT10_p2.txt_1	126C	1433B_MOUSE|Q9CQV8	17.1316	WT_Early_3	WT_Early	NA	Model	NA	NA	Model	143586	1.74952e+06	0.0820716
OBJ38812_TMT10_p2.txt	1	OBJ38812_TMT10_p2.txt_1	129C	1433B_MOUSE|Q9CQV8	17.3152	WT_Early_4	WT_Early	NA	Model	NA	NA	Model	163076	1.74952e+06	0.0932119
OBJ38812_TMT10_p2.txt	1	OBJ38812_TMT10_p2.txt_1	127C	1433B_MOUSE|Q9CQV8	17.1242	WT_Late_3	WT_Late	NA	Model	NA	NA	Model	142855	1.74952e+06	0.0816537
OBJ38812_TMT10_p2.txt	1	OBJ38812_TMT10_p2.txt_1	130C	1433B_MOUSE|Q9CQV8	17.2039	WT_Late_4	WT_Late	NA	Model	NA	NA	Model	150975	1.74952e+06	0.0862947
OBJ38812_TMT10_p2.txt	1	OBJ38812_TMT10_p2.txt_1	128C	1433B_MOUSE|Q9CQV8	16.7976	WT_Uninfect_3	WT_Uninfect	NA	Model	NA	NA	Model	113917	1.74952e+06	0.0651133
OBJ38812_TMT10_p2.txt	1	OBJ38812_TMT10_p2.txt_1	131C	1433B_MOUSE|Q9CQV8	17.3171	WT_Uninfect_4	WT_Uninfect	NA	Model	NA	NA	Model	163288	1.74952e+06	0.093333
OBJ38812_TMT10.txt	1	OBJ38812_TMT10.txt_1	127N	1433B_MOUSE|Q9CQV8	17.0228	KO_Early_1	KO_Early	NA	Model	NA	NA	Model	133159	1.72599e+06	0.0771493
OBJ38812_TMT10.txt	1	OBJ38812_TMT10.txt_1	130N	1433B_MOUSE|Q9CQV8	17.0101	KO_Early_2	KO_Early	NA	Model	NA	NA	Model	131993	1.72599e+06	0.0764735
OBJ38812_TMT10.txt	1	OBJ38812_TMT10.txt_1	128N	1433B_MOUSE|Q9CQV8	17.0964	KO_Late_1	KO_Late	NA	Model	NA	NA	Model	140128	1.72599e+06	0.0811869
OBJ38812_TMT10.txt	1	OBJ38812_TMT10.txt_1	131N	1433B_MOUSE|Q9CQV8	16.9728	KO_Late_2	KO_Late	NA	Model	NA	NA	Model	128625	1.72599e+06	0.0745226
OBJ38812_TMT10.txt	1	OBJ38812_TMT10.txt_1	129N	1433B_MOUSE|Q9CQV8	16.9783	KO_Uninfect_1	KO_Uninfect	NA	Model	NA	NA	Model	129116	1.72599e+06	0.0748069
OBJ38812_TMT10.txt	1	OBJ38812_TMT10.txt_1	131C	1433B_MOUSE|Q9CQV8	17.1101	KO_Uninfect_2	KO_Uninfect	NA	Model	NA	NA	Model	141464	1.72599e+06	0.0819613
OBJ38812_TMT10.txt	1	OBJ38812_TMT10.txt_1	126C	1433B_MOUSE|Q9CQV8	17.26	WT_Early_1	WT_Early	NA	Model	NA	NA	Model	156954	1.72599e+06	0.0909355
OBJ38812_TMT10.txt	1	OBJ38812_TMT10.txt_1	129C	1433B_MOUSE|Q9CQV8	17.2872	WT_Early_2	WT_Early	NA	Model	NA	NA	Model	159943	1.72599e+06	0.0926674
OBJ38812_TMT10.txt	1	OBJ38812_TMT10.txt_1	127C	1433B_MOUSE|Q9CQV8	17.1505	WT_Late_1	WT_Late	NA	Model	NA	NA	Model	145484	1.72599e+06	0.0842904
OBJ38812_TMT10.txt	1	OBJ38812_TMT10.txt_1	130C	1433B_MOUSE|Q9CQV8	17.3706	WT_Late_2	WT_Late	NA	Model	NA	NA	Model	169461	1.72599e+06	0.098182
OBJ38812_TMT10.txt	1	OBJ38812_TMT10.txt_1	128C	1433B_MOUSE|Q9CQV8	17.1573	WT_Uninfect_1	WT_Uninfect	NA	Model	NA	NA	Model	146172	1.72599e+06	0.0846889
OBJ38812_TMT10_p2.txt	1	OBJ38812_TMT10_p2.txt_1	127N	1433E_MOUSE|P62259	16.7522	KO_Early_3	KO_Early	NA	Model	NA	NA	Model	110387	1.34856e+06	0.0818557
OBJ38812_TMT10_p2.txt	1	OBJ38812_TMT10_p2.txt_1	130N	1433E_MOUSE|P62259	16.6243	KO_Early_4	KO_Early	NA	Model	NA	NA	Model	101024	1.34856e+06	0.0749129
OBJ38812_TMT10_p2.txt	1	OBJ38812_TMT10_p2.txt_1	128N	1433E_MOUSE|P62259	16.7179	KO_Late_3	KO_Late	NA	Model	NA	NA	Model	107795	1.34856e+06	0.0799339
OBJ38812_TMT10_p2.txt	1	OBJ38812_TMT10_p2.txt_1	131N	1433E_MOUSE|P62259	16.7907	KO_Late_4	KO_Late	NA	Model	NA	NA	Model	113370	1.34856e+06	0.0840677
OBJ38812_TMT10_p2.txt	1	OBJ38812_TMT10_p2.txt_1	129N	1433E_MOUSE|P62259	17.0549	KO_Uninfect_3	KO_Uninfect	NA	Model	NA	NA	Model	136160	1.34856e+06	0.100967
OBJ38812_TMT10_p2.txt	1	OBJ38812_TMT10_p2.txt_1	126C	1433E_MOUSE|P62259	16.7608	WT_Early_3	WT_Early	NA	Model	NA	NA	Model	111050	1.34856e+06	0.0823473
OBJ38812_TMT10_p2.txt	1	OBJ38812_TMT10_p2.txt_1	129C	1433E_MOUSE|P62259	16.835	WT_Early_4	WT_Early	NA	Model	NA	NA	Model	116908	1.34856e+06	0.0866915
OBJ38812_TMT10_p2.txt	1	OBJ38812_TMT10_p2.txt_1	127C	1433E_MOUSE|P62259	16.6641	WT_Late_3	WT_Late	NA	Model	NA	NA	Model	103845	1.34856e+06	0.0770048
OBJ38812_TMT10_p2.txt	1	OBJ38812_TMT10_p2.txt_1	130C	1433E_MOUSE|P62259	16.8723	WT_Late_4	WT_Late	NA	Model	NA	NA	Model	119965	1.34856e+06	0.0889582
OBJ38812_TMT10_p2.txt	1	OBJ38812_TMT10_p2.txt_1	128C	1433E_MOUSE|P62259	16.6868	WT_Uninfect_3	WT_Uninfect	NA	Model	NA	NA	Model	105496	1.34856e+06	0.0782287
OBJ38812_TMT10_p2.txt	1	OBJ38812_TMT10_p2.txt_1	131C	1433E_MOUSE|P62259	16.7516	WT_Uninfect_4	WT_Uninfect	NA	Model	NA	NA	Model	110340	1.34856e+06	0.0818207
OBJ38812_TMT10.txt	1	OBJ38812_TMT10.txt_1	127N	1433E_MOUSE|P62259	16.7241	KO_Early_1	KO_Early	NA	Model	NA	NA	Model	108258	1.34963e+06	0.0802131
OBJ38812_TMT10.txt	1	OBJ38812_TMT10.txt_1	130N	1433E_MOUSE|P62259	16.6009	KO_Early_2	KO_Early	NA	Model	NA	NA	Model	99394.5	1.34963e+06	0.073646
OBJ38812_TMT10.txt	1	OBJ38812_TMT10.txt_1	128N	1433E_MOUSE|P62259	16.7686	KO_Late_1	KO_Late	NA	Model	NA	NA	Model	111649	1.34963e+06	0.0827262
OBJ38812_TMT10.txt	1	OBJ38812_TMT10.txt_1	131N	1433E_MOUSE|P62259	16.6163	KO_Late_2	KO_Late	NA	Model	NA	NA	Model	100462	1.34963e+06	0.0744367
OBJ38812_TMT10.txt	1	OBJ38812_TMT10.txt_1	129N	1433E_MOUSE|P62259	16.4504	KO_Uninfect_1	KO_Uninfect	NA	Model	NA	NA	Model	89547.8	1.34963e+06	0.0663501
OBJ38812_TMT10.txt	1	OBJ38812_TMT10.txt_1	131C	1433E_MOUSE|P62259	16.7158	KO_Uninfect_2	KO_Uninfect	NA	Model	NA	NA	Model	107634	1.34963e+06	0.0797511
OBJ38812_TMT10.txt	1	OBJ38812_TMT10.txt_1	126C	1433E_MOUSE|P62259	16.9094	WT_Early_1	WT_Early	NA	Model	NA	NA	Model	123097	1.34963e+06	0.0912085
OBJ38812_TMT10.txt	1	OBJ38812_TMT10.txt_1	129C	1433E_MOUSE|P62259	16.907	WT_Early_2	WT_Early	NA	Model	NA	NA	Model	122890	1.34963e+06	0.0910547
OBJ38812_TMT10.txt	1	OBJ38812_TMT10.txt_1	127C	1433E_MOUSE|P62259	16.8913	WT_Late_1	WT_Late	NA	Model	NA	NA	Model	121559	1.34963e+06	0.0900689
OBJ38812_TMT10.txt	1	OBJ38812_TMT10.txt_1	130C	1433E_MOUSE|P62259	17.0347	WT_Late_2	WT_Late	NA	Model	NA	NA	Model	134262	1.34963e+06	0.0994811
OBJ38812_TMT10.txt	1	OBJ38812_TMT10.txt_1	128C	1433E_MOUSE|P62259	16.8564	WT_Uninfect_1	WT_Uninfect	NA	Model	NA	NA	Model	118656	1.34963e+06	0.087918
OBJ38812_TMT10_p2.txt	1	OBJ38812_TMT10_p2.txt_1	127N	1433F_MOUSE|P68510	16.8536	KO_Early_3	KO_Early	NA	Model	NA	NA	Model	118420	1.73791e+06	0.0681396
OBJ38812_TMT10_p2.txt	1	OBJ38812_TMT10_p2.txt_1	130N	1433F_MOUSE|P68510	16.8043	KO_Early_4	KO_Early	NA	Model	NA	NA	Model	114448	1.73791e+06	0.0658541
OBJ38812_TMT10_p2.txt	1	OBJ38812_TMT10_p2.txt_1	128N	1433F_MOUSE|P68510	16.7554	KO_Late_3	KO_Late	NA	Model	NA	NA	Model	110632	1.73791e+06	0.0636579
OBJ38812_TMT10_p2.txt	1	OBJ38812_TMT10_p2.txt_1	131N	1433F_MOUSE|P68510	16.9721	KO_Late_4	KO_Late	NA	Model	NA	NA	Model	128561	1.73791e+06	0.0739744
OBJ38812_TMT10_p2.txt	1	OBJ38812_TMT10_p2.txt_1	129N	1433F_MOUSE|P68510	17.1021	KO_Uninfect_3	KO_Uninfect	NA	Model	NA	NA	Model	140682	1.73791e+06	0.0809492
OBJ38812_TMT10_p2.txt	1	OBJ38812_TMT10_p2.txt_1	126C	1433F_MOUSE|P68510	17.4609	WT_Early_3	WT_Early	NA	Model	NA	NA	Model	180405	1.73791e+06	0.103806
OBJ38812_TMT10_p2.txt	1	OBJ38812_TMT10_p2.txt_1	129C	1433F_MOUSE|P68510	17.3487	WT_Early_4	WT_Early	NA	Model	NA	NA	Model	166911	1.73791e+06	0.0960413
OBJ38812_TMT10_p2.txt	1	OBJ38812_TMT10_p2.txt_1	127C	1433F_MOUSE|P68510	17.3124	WT_Late_3	WT_Late	NA	Model	NA	NA	Model	162758	1.73791e+06	0.0936515
OBJ38812_TMT10_p2.txt	1	OBJ38812_TMT10_p2.txt_1	130C	1433F_MOUSE|P68510	17.2911	WT_Late_4	WT_Late	NA	Model	NA	NA	Model	160372	1.73791e+06	0.0922789
OBJ38812_TMT10_p2.txt	1	OBJ38812_TMT10_p2.txt_1	128C	1433F_MOUSE|P68510	17.0305	WT_Uninfect_3	WT_Uninfect	NA	Model	NA	NA	Model	133870	1.73791e+06	0.0770295
OBJ38812_TMT10_p2.txt	1	OBJ38812_TMT10_p2.txt_1	131C	1433F_MOUSE|P68510	17.4659	WT_Uninfect_4	WT_Uninfect	NA	Model	NA	NA	Model	181040	1.73791e+06	0.104171
OBJ38812_TMT10.txt	1	OBJ38812_TMT10.txt_1	127N	1433F_MOUSE|P68510	16.9928	KO_Early_1	KO_Early	NA	Model	NA	NA	Model	130419	1.6711e+06	0.078044
OBJ38812_TMT10.txt	1	OBJ38812_TMT10.txt_1	130N	1433F_MOUSE|P68510	16.8447	KO_Early_2	KO_Early	NA	Model	NA	NA	Model	117696	1.6711e+06	0.0704307
OBJ38812_TMT10.txt	1	OBJ38812_TMT10.txt_1	128N	1433F_MOUSE|P68510	17.0408	KO_Late_1	KO_Late	NA	Model	NA	NA	Model	134836	1.6711e+06	0.0806872
OBJ38812_TMT10.txt	1	OBJ38812_TMT10.txt_1	131N	1433F_MOUSE|P68510	16.8512	KO_Late_2	KO_Late	NA	Model	NA	NA	Model	118226	1.6711e+06	0.0707479
OBJ38812_TMT10.txt	1	OBJ38812_TMT10.txt_1	129N	1433F_MOUSE|P68510	16.8212	KO_Uninfect_1	KO_Uninfect	NA	Model	NA	NA	Model	115797	1.6711e+06	0.0692942
OBJ38812_TMT10.txt	1	OBJ38812_TMT10.txt_1	131C	1433F_MOUSE|P68510	16.8695	KO_Uninfect_2	KO_Uninfect	NA	Model	NA	NA	Model	119734	1.6711e+06	0.0716498
OBJ38812_TMT10.txt	1	OBJ38812_TMT10.txt_1	126C	1433F_MOUSE|P68510	17.3662	WT_Early_1	WT_Early	NA	Model	NA	NA	Model	168941	1.6711e+06	0.101096
OBJ38812_TMT10.txt	1	OBJ38812_TMT10.txt_1	129C	1433F_MOUSE|P68510	17.3506	WT_Early_2	WT_Early	NA	Model	NA	NA	Model	167134	1.6711e+06	0.100015
OBJ38812_TMT10.txt	1	OBJ38812_TMT10.txt_1	127C	1433F_MOUSE|P68510	17.197	WT_Late_1	WT_Late	NA	Model	NA	NA	Model	150252	1.6711e+06	0.0899122
OBJ38812_TMT10.txt	1	OBJ38812_TMT10.txt_1	130C	1433F_MOUSE|P68510	17.2737	WT_Late_2	WT_Late	NA	Model	NA	NA	Model	158459	1.6711e+06	0.0948233
OBJ38812_TMT10.txt	1	OBJ38812_TMT10.txt_1	128C	1433F_MOUSE|P68510	17.1926	WT_Uninfect_1	WT_Uninfect	NA	Model	NA	NA	Model	149792	1.6711e+06	0.0896368
OBJ38812_TMT10_p2.txt	1	OBJ38812_TMT10_p2.txt_1	127N	1433G_MOUSE|P61982	16.8973	KO_Early_3	KO_Early	NA	Model	NA	NA	Model	122063	1.42488e+06	0.0856658
OBJ38812_TMT10_p2.txt	1	OBJ38812_TMT10_p2.txt_1	130N	1433G_MOUSE|P61982	16.8326	KO_Early_4	KO_Early	NA	Model	NA	NA	Model	116710	1.42488e+06	0.081909
OBJ38812_TMT10_p2.txt	1	OBJ38812_TMT10_p2.txt_1	128N	1433G_MOUSE|P61982	16.7149	KO_Late_3	KO_Late	NA	Model	NA	NA	Model	107566	1.42488e+06	0.0754912
OBJ38812_TMT10_p2.txt	1	OBJ38812_TMT10_p2.txt_1	131N	1433G_MOUSE|P61982	16.6907	KO_Late_4	KO_Late	NA	Model	NA	NA	Model	105781	1.42488e+06	0.0742386
OBJ38812_TMT10_p2.txt	1	OBJ38812_TMT10_p2.txt_1	129N	1433G_MOUSE|P61982	17.1686	KO_Uninfect_3	KO_Uninfect	NA	Model	NA	NA	Model	147322	1.42488e+06	0.103393
OBJ38812_TMT10_p2.txt	1	OBJ38812_TMT10_p2.txt_1	126C	1433G_MOUSE|P61982	16.8054	WT_Early_3	WT_Early	NA	Model	NA	NA	Model	114532	1.42488e+06	0.08038
OBJ38812_TMT10_p2.txt	1	OBJ38812_TMT10_p2.txt_1	129C	1433G_MOUSE|P61982	16.9342	WT_Early_4	WT_Early	NA	Model	NA	NA	Model	125231	1.42488e+06	0.0878892
OBJ38812_TMT10_p2.txt	1	OBJ38812_TMT10_p2.txt_1	127C	1433G_MOUSE|P61982	16.5173	WT_Late_3	WT_Late	NA	Model	NA	NA	Model	93800	1.42488e+06	0.0658301
OBJ38812_TMT10_p2.txt	1	OBJ38812_TMT10_p2.txt_1	130C	1433G_MOUSE|P61982	16.9815	WT_Late_4	WT_Late	NA	Model	NA	NA	Model	129404	1.42488e+06	0.0908176
OBJ38812_TMT10_p2.txt	1	OBJ38812_TMT10_p2.txt_1	128C	1433G_MOUSE|P61982	16.6187	WT_Uninfect_3	WT_Uninfect	NA	Model	NA	NA	Model	100627	1.42488e+06	0.0706211
OBJ38812_TMT10_p2.txt	1	OBJ38812_TMT10_p2.txt_1	131C	1433G_MOUSE|P61982	17.1601	WT_Uninfect_4	WT_Uninfect	NA	Model	NA	NA	Model	146456	1.42488e+06	0.102785
OBJ38812_TMT10.txt	1	OBJ38812_TMT10.txt_1	127N	1433G_MOUSE|P61982	16.8333	KO_Early_1	KO_Early	NA	Model	NA	NA	Model	116766	1.38202e+06	0.0844892
OBJ38812_TMT10.txt	1	OBJ38812_TMT10.txt_1	130N	1433G_MOUSE|P61982	16.7303	KO_Early_2	KO_Early	NA	Model	NA	NA	Model	108722	1.38202e+06	0.0786686
OBJ38812_TMT10.txt	1	OBJ38812_TMT10.txt_1	128N	1433G_MOUSE|P61982	16.7642	KO_Late_1	KO_Late	NA	Model	NA	NA	Model	111305	1.38202e+06	0.0805378
OBJ38812_TMT10.txt	1	OBJ38812_TMT10.txt_1	131N	1433G_MOUSE|P61982	16.6883	KO_Late_2	KO_Late	NA	Model	NA	NA	Model	105601	1.38202e+06	0.0764106
OBJ38812_TMT10.txt	1	OBJ38812_TMT10.txt_1	129N	1433G_MOUSE|P61982	16.5348	KO_Uninfect_1	KO_Uninfect	NA	Model	NA	NA	Model	94944.3	1.38202e+06	0.0686996
OBJ38812_TMT10.txt	1	OBJ38812_TMT10.txt_1	131C	1433G_MOUSE|P61982	16.6817	KO_Uninfect_2	KO_Uninfect	NA	Model	NA	NA	Model	105122	1.38202e+06	0.0760642
OBJ38812_TMT10.txt	1	OBJ38812_TMT10.txt_1	126C	1433G_MOUSE|P61982	16.8267	WT_Early_1	WT_Early	NA	Model	NA	NA	Model	116239	1.38202e+06	0.0841083
OBJ38812_TMT10.txt	1	OBJ38812_TMT10.txt_1	129C	1433G_MOUSE|P61982	17.0633	WT_Early_2	WT_Early	NA	Model	NA	NA	Model	136954	1.38202e+06	0.099097
OBJ38812_TMT10.txt	1	OBJ38812_TMT10.txt_1	127C	1433G_MOUSE|P61982	16.7754	WT_Late_1	WT_Late	NA	Model	NA	NA	Model	112176	1.38202e+06	0.0811678
OBJ38812_TMT10.txt	1	OBJ38812_TMT10.txt_1	130C	1433G_MOUSE|P61982	17.1343	WT_Late_2	WT_Late	NA	Model	NA	NA	Model	143856	1.38202e+06	0.104091
OBJ38812_TMT10.txt	1	OBJ38812_TMT10.txt_1	128C	1433G_MOUSE|P61982	16.8106	WT_Uninfect_1	WT_Uninfect	NA	Model	NA	NA	Model	114949	1.38202e+06	0.0831747
OBJ38812_TMT10_p2.txt	1	OBJ38812_TMT10_p2.txt_1	127N	1433T_MOUSE|P68254	16.2616	KO_Early_3	KO_Early	NA	Model	NA	NA	Model	78567.4	949885	0.0827125
OBJ38812_TMT10_p2.txt	1	OBJ38812_TMT10_p2.txt_1	130N	1433T_MOUSE|P68254	15.7963	KO_Early_4	KO_Early	NA	Model	NA	NA	Model	56904.4	949885	0.0599066
OBJ38812_TMT10_p2.txt	1	OBJ38812_TMT10_p2.txt_1	128N	1433T_MOUSE|P68254	16.1553	KO_Late_3	KO_Late	NA	Model	NA	NA	Model	72982.7	949885	0.0768332
OBJ38812_TMT10_p2.txt	1	OBJ38812_TMT10_p2.txt_1	131N	1433T_MOUSE|P68254	16.101	KO_Late_4	KO_Late	NA	Model	NA	NA	Model	70286.6	949885	0.0739949
OBJ38812_TMT10_p2.txt	1	OBJ38812_TMT10_p2.txt_1	129N	1433T_MOUSE|P68254	16.188	KO_Uninfect_3	KO_Uninfect	NA	Model	NA	NA	Model	74658.9	949885	0.0785978
OBJ38812_TMT10_p2.txt	1	OBJ38812_TMT10_p2.txt_1	126C	1433T_MOUSE|P68254	16.5497	WT_Early_3	WT_Early	NA	Model	NA	NA	Model	95927.1	949885	0.100988
OBJ38812_TMT10_p2.txt	1	OBJ38812_TMT10_p2.txt_1	129C	1433T_MOUSE|P68254	16.433	WT_Early_4	WT_Early	NA	Model	NA	NA	Model	88477.8	949885	0.0931458
OBJ38812_TMT10_p2.txt	1	OBJ38812_TMT10_p2.txt_1	127C	1433T_MOUSE|P68254	16.5344	WT_Late_3	WT_Late	NA	Model	NA	NA	Model	94916.4	949885	0.0999241
OBJ38812_TMT10_p2.txt	1	OBJ38812_TMT10_p2.txt_1	130C	1433T_MOUSE|P68254	16.4749	WT_Late_4	WT_Late	NA	Model	NA	NA	Model	91082.2	949885	0.0958876
OBJ38812_TMT10_p2.txt	1	OBJ38812_TMT10_p2.txt_1	128C	1433T_MOUSE|P68254	15.9143	WT_Uninfect_3	WT_Uninfect	NA	Model	NA	NA	Model	61756.5	949885	0.0650147
OBJ38812_TMT10_p2.txt	1	OBJ38812_TMT10_p2.txt_1	131C	1433T_MOUSE|P68254	16.4068	WT_Uninfect_4	WT_Uninfect	NA	Model	NA	NA	Model	86882.7	949885	0.0914666
OBJ38812_TMT10.txt	1	OBJ38812_TMT10.txt_1	127N	1433T_MOUSE|P68254	16.2509	KO_Early_1	KO_Early	NA	Model	NA	NA	Model	77982.2	925197	0.0842871
OBJ38812_TMT10.txt	1	OBJ38812_TMT10.txt_1	130N	1433T_MOUSE|P68254	16.1724	KO_Early_2	KO_Early	NA	Model	NA	NA	Model	73852.2	925197	0.0798232
OBJ38812_TMT10.txt	1	OBJ38812_TMT10.txt_1	128N	1433T_MOUSE|P68254	16.1196	KO_Late_1	KO_Late	NA	Model	NA	NA	Model	71203	925197	0.0769598
OBJ38812_TMT10.txt	1	OBJ38812_TMT10.txt_1	131N	1433T_MOUSE|P68254	16.0209	KO_Late_2	KO_Late	NA	Model	NA	NA	Model	66493.5	925197	0.0718695
OBJ38812_TMT10.txt	1	OBJ38812_TMT10.txt_1	129N	1433T_MOUSE|P68254	16.1844	KO_Uninfect_1	KO_Uninfect	NA	Model	NA	NA	Model	74470.5	925197	0.0804916
OBJ38812_TMT10.txt	1	OBJ38812_TMT10.txt_1	131C	1433T_MOUSE|P68254	16.1187	KO_Uninfect_2	KO_Uninfect	NA	Model	NA	NA	Model	71156.2	925197	0.0769092
OBJ38812_TMT10.txt	1	OBJ38812_TMT10.txt_1	126C	1433T_MOUSE|P68254	16.3551	WT_Early_1	WT_Early	NA	Model	NA	NA	Model	83823.9	925197	0.0906011
OBJ38812_TMT10.txt	1	OBJ38812_TMT10.txt_1	129C	1433T_MOUSE|P68254	16.3593	WT_Early_2	WT_Early	NA	Model	NA	NA	Model	84071.5	925197	0.0908688
OBJ38812_TMT10.txt	1	OBJ38812_TMT10.txt_1	127C	1433T_MOUSE|P68254	16.285	WT_Late_1	WT_Late	NA	Model	NA	NA	Model	79849.5	925197	0.0863055
OBJ38812_TMT10.txt	1	OBJ38812_TMT10.txt_1	130C	1433T_MOUSE|P68254	16.2963	WT_Late_2	WT_Late	NA	Model	NA	NA	Model	80477.4	925197	0.0869841
OBJ38812_TMT10.txt	1	OBJ38812_TMT10.txt_1	128C	1433T_MOUSE|P68254	16.3645	WT_Uninfect_1	WT_Uninfect	NA	Model	NA	NA	Model	84374.5	925197	0.0911963
OBJ38812_TMT10_p2.txt	1	OBJ38812_TMT10_p2.txt_1	127N	1433Z_MOUSE|P63101	17.3041	KO_Early_3	KO_Early	NA	Model	NA	NA	Model	161822	1.96787e+06	0.0822321
OBJ38812_TMT10_p2.txt	1	OBJ38812_TMT10_p2.txt_1	130N	1433Z_MOUSE|P63101	17.1521	KO_Early_4	KO_Early	NA	Model	NA	NA	Model	145649	1.96787e+06	0.0740134
OBJ38812_TMT10_p2.txt	1	OBJ38812_TMT10_p2.txt_1	128N	1433Z_MOUSE|P63101	17.1995	KO_Late_3	KO_Late	NA	Model	NA	NA	Model	150511	1.96787e+06	0.0764843
OBJ38812_TMT10_p2.txt	1	OBJ38812_TMT10_p2.txt_1	131N	1433Z_MOUSE|P63101	17.2454	KO_Late_4	KO_Late	NA	Model	NA	NA	Model	155376	1.96787e+06	0.0789565
OBJ38812_TMT10_p2.txt	1	OBJ38812_TMT10_p2.txt_1	129N	1433Z_MOUSE|P63101	17.5486	KO_Uninfect_3	KO_Uninfect	NA	Model	NA	NA	Model	191708	1.96787e+06	0.097419
OBJ38812_TMT10_p2.txt	1	OBJ38812_TMT10_p2.txt_1	126C	1433Z_MOUSE|P63101	17.3318	WT_Early_3	WT_Early	NA	Model	NA	NA	Model	164964	1.96787e+06	0.0838287
OBJ38812_TMT10_p2.txt	1	OBJ38812_TMT10_p2.txt_1	129C	1433Z_MOUSE|P63101	17.6005	WT_Early_4	WT_Early	NA	Model	NA	NA	Model	198742	1.96787e+06	0.100993
OBJ38812_TMT10_p2.txt	1	OBJ38812_TMT10_p2.txt_1	127C	1433Z_MOUSE|P63101	17.3767	WT_Late_3	WT_Late	NA	Model	NA	NA	Model	170183	1.96787e+06	0.0864807
OBJ38812_TMT10_p2.txt	1	OBJ38812_TMT10_p2.txt_1	130C	1433Z_MOUSE|P63101	17.35	WT_Late_4	WT_Late	NA	Model	NA	NA	Model	167060	1.96787e+06	0.0848936
OBJ38812_TMT10_p2.txt	1	OBJ38812_TMT10_p2.txt_1	128C	1433Z_MOUSE|P63101	16.8915	WT_Uninfect_3	WT_Uninfect	NA	Model	NA	NA	Model	121577	1.96787e+06	0.0617808
OBJ38812_TMT10_p2.txt	1	OBJ38812_TMT10_p2.txt_1	131C	1433Z_MOUSE|P63101	17.4489	WT_Uninfect_4	WT_Uninfect	NA	Model	NA	NA	Model	178909	1.96787e+06	0.0909149
OBJ38812_TMT10.txt	1	OBJ38812_TMT10.txt_1	127N	1433Z_MOUSE|P63101	17.2276	KO_Early_1	KO_Early	NA	Model	NA	NA	Model	153468	1.94617e+06	0.0788566
OBJ38812_TMT10.txt	1	OBJ38812_TMT10.txt_1	130N	1433Z_MOUSE|P63101	17.2035	KO_Early_2	KO_Early	NA	Model	NA	NA	Model	150925	1.94617e+06	0.0775501
OBJ38812_TMT10.txt	1	OBJ38812_TMT10.txt_1	128N	1433Z_MOUSE|P63101	17.332	KO_Late_1	KO_Late	NA	Model	NA	NA	Model	164988	1.94617e+06	0.0847758
OBJ38812_TMT10.txt	1	OBJ38812_TMT10.txt_1	131N	1433Z_MOUSE|P63101	17.1352	KO_Late_2	KO_Late	NA	Model	NA	NA	Model	143949	1.94617e+06	0.0739656
OBJ38812_TMT10.txt	1	OBJ38812_TMT10.txt_1	129N	1433Z_MOUSE|P63101	17.2803	KO_Uninfect_1	KO_Uninfect	NA	Model	NA	NA	Model	159185	1.94617e+06	0.0817939
OBJ38812_TMT10.txt	1	OBJ38812_TMT10.txt_1	131C	1433Z_MOUSE|P63101	17.3526	KO_Uninfect_2	KO_Uninfect	NA	Model	NA	NA	Model	167355	1.94617e+06	0.0859921
OBJ38812_TMT10.txt	1	OBJ38812_TMT10.txt_1	126C	1433Z_MOUSE|P63101	17.3691	WT_Early_1	WT_Early	NA	Model	NA	NA	Model	169288	1.94617e+06	0.0869854
OBJ38812_TMT10.txt	1	OBJ38812_TMT10.txt_1	129C	1433Z_MOUSE|P63101	17.4119	WT_Early_2	WT_Early	NA	Model	NA	NA	Model	174383	1.94617e+06	0.0896033
OBJ38812_TMT10.txt	1	OBJ38812_TMT10.txt_1	127C	1433Z_MOUSE|P63101	17.2493	WT_Late_1	WT_Late	NA	Model	NA	NA	Model	155795	1.94617e+06	0.080052
OBJ38812_TMT10.txt	1	OBJ38812_TMT10.txt_1	130C	1433Z_MOUSE|P63101	17.3108	WT_Late_2	WT_Late	NA	Model	NA	NA	Model	162579	1.94617e+06	0.0835382
OBJ38812_TMT10.txt	1	OBJ38812_TMT10.txt_1	128C	1433Z_MOUSE|P63101	17.4805	WT_Uninfect_1	WT_Uninfect	NA	Model	NA	NA	Model	182880	1.94617e+06	0.0939695
OBJ38812_TMT10_p2.txt	1	OBJ38812_TMT10_p2.txt_1	127N	1A1L1_MOUSE|A2AIG8	15.2077	KO_Early_3	KO_Early	NA	Model	NA	NA	Model	37842.7	376096	0.10062
OBJ38812_TMT10_p2.txt	1	OBJ38812_TMT10_p2.txt_1	130N	1A1L1_MOUSE|A2AIG8	14.8543	KO_Early_4	KO_Early	NA	Model	NA	NA	Model	29620.3	376096	0.0787572
OBJ38812_TMT10_p2.txt	1	OBJ38812_TMT10_p2.txt_1	128N	1A1L1_MOUSE|A2AIG8	14.8912	KO_Late_3	KO_Late	NA	Model	NA	NA	Model	30388.1	376096	0.0807988
OBJ38812_TMT10_p2.txt	1	OBJ38812_TMT10_p2.txt_1	131N	1A1L1_MOUSE|A2AIG8	14.8596	KO_Late_4	KO_Late	NA	Model	NA	NA	Model	29729.9	376096	0.0790489
OBJ38812_TMT10_p2.txt	1	OBJ38812_TMT10_p2.txt_1	129N	1A1L1_MOUSE|A2AIG8	15.3407	KO_Uninfect_3	KO_Uninfect	NA	Model	NA	NA	Model	41497.5	376096	0.110338
OBJ38812_TMT10_p2.txt	1	OBJ38812_TMT10_p2.txt_1	126C	1A1L1_MOUSE|A2AIG8	14.8337	WT_Early_3	WT_Early	NA	Model	NA	NA	Model	29200	376096	0.0776398
OBJ38812_TMT10_p2.txt	1	OBJ38812_TMT10_p2.txt_1	129C	1A1L1_MOUSE|A2AIG8	14.9776	WT_Early_4	WT_Early	NA	Model	NA	NA	Model	32262.5	376096	0.0857827
OBJ38812_TMT10_p2.txt	1	OBJ38812_TMT10_p2.txt_1	127C	1A1L1_MOUSE|A2AIG8	14.9979	WT_Late_3	WT_Late	NA	Model	NA	NA	Model	32720.8	376096	0.0870014
OBJ38812_TMT10_p2.txt	1	OBJ38812_TMT10_p2.txt_1	130C	1A1L1_MOUSE|A2AIG8	15.0563	WT_Late_4	WT_Late	NA	Model	NA	NA	Model	34071.6	376096	0.0905929
OBJ38812_TMT10_p2.txt	1	OBJ38812_TMT10_p2.txt_1	128C	1A1L1_MOUSE|A2AIG8	15	WT_Uninfect_3	WT_Uninfect	NA	Model	NA	NA	Model	32767.2	376096	0.0871247
OBJ38812_TMT10_p2.txt	1	OBJ38812_TMT10_p2.txt_1	131C	1A1L1_MOUSE|A2AIG8	13.6865	WT_Uninfect_4	WT_Uninfect	NA	Model	NA	NA	Model	13183.9	376096	0.0350546
OBJ38812_TMT10_p2.txt	1	OBJ38812_TMT10_p2.txt_1	127N	2A5A_MOUSE|Q6PD03	16.3847	KO_Early_3	KO_Early	NA	Model	NA	NA	Model	85563	1.00797e+06	0.0848867
OBJ38812_TMT10_p2.txt	1	OBJ38812_TMT10_p2.txt_1	130N	2A5A_MOUSE|Q6PD03	16.5157	KO_Early_4	KO_Early	NA	Model	NA	NA	Model	93698.9	1.00797e+06	0.0929583
OBJ38812_TMT10_p2.txt	1	OBJ38812_TMT10_p2.txt_1	128N	2A5A_MOUSE|Q6PD03	16.2641	KO_Late_3	KO_Late	NA	Model	NA	NA	Model	78700.4	1.00797e+06	0.0780783
OBJ38812_TMT10_p2.txt	1	OBJ38812_TMT10_p2.txt_1	131N	2A5A_MOUSE|Q6PD03	16.2823	KO_Late_4	KO_Late	NA	Model	NA	NA	Model	79702	1.00797e+06	0.079072
OBJ38812_TMT10_p2.txt	1	OBJ38812_TMT10_p2.txt_1	129N	2A5A_MOUSE|Q6PD03	16.3878	KO_Uninfect_3	KO_Uninfect	NA	Model	NA	NA	Model	85748.6	1.00797e+06	0.0850708
OBJ38812_TMT10_p2.txt	1	OBJ38812_TMT10_p2.txt_1	126C	2A5A_MOUSE|Q6PD03	16.1439	WT_Early_3	WT_Early	NA	Model	NA	NA	Model	72412	1.00797e+06	0.0718396
OBJ38812_TMT10_p2.txt	1	OBJ38812_TMT10_p2.txt_1	129C	2A5A_MOUSE|Q6PD03	16.3067	WT_Early_4	WT_Early	NA	Model	NA	NA	Model	81062	1.00797e+06	0.0804212
OBJ38812_TMT10_p2.txt	1	OBJ38812_TMT10_p2.txt_1	127C	2A5A_MOUSE|Q6PD03	16.1359	WT_Late_3	WT_Late	NA	Model	NA	NA	Model	72009.1	1.00797e+06	0.0714399
OBJ38812_TMT10_p2.txt	1	OBJ38812_TMT10_p2.txt_1	130C	2A5A_MOUSE|Q6PD03	16.4207	WT_Late_4	WT_Late	NA	Model	NA	NA	Model	87724.3	1.00797e+06	0.0870309
OBJ38812_TMT10_p2.txt	1	OBJ38812_TMT10_p2.txt_1	128C	2A5A_MOUSE|Q6PD03	16.336	WT_Uninfect_3	WT_Uninfect	NA	Model	NA	NA	Model	82721.1	1.00797e+06	0.0820672
OBJ38812_TMT10_p2.txt	1	OBJ38812_TMT10_p2.txt_1	131C	2A5A_MOUSE|Q6PD03	16.7065	WT_Uninfect_4	WT_Uninfect	NA	Model	NA	NA	Model	106941	1.00797e+06	0.106095
OBJ38812_TMT10.txt	1	OBJ38812_TMT10.txt_1	127N	2A5A_MOUSE|Q6PD03	16.274	KO_Early_1	KO_Early	NA	Model	NA	NA	Model	79244.6	985475	0.0804126
OBJ38812_TMT10.txt	1	OBJ38812_TMT10.txt_1	130N	2A5A_MOUSE|Q6PD03	16.3233	KO_Early_2	KO_Early	NA	Model	NA	NA	Model	81999.5	985475	0.0832081
OBJ38812_TMT10.txt	1	OBJ38812_TMT10.txt_1	128N	2A5A_MOUSE|Q6PD03	16.2854	KO_Late_1	KO_Late	NA	Model	NA	NA	Model	79874	985475	0.0810513
OBJ38812_TMT10.txt	1	OBJ38812_TMT10.txt_1	131N	2A5A_MOUSE|Q6PD03	16.2393	KO_Late_2	KO_Late	NA	Model	NA	NA	Model	77358.8	985475	0.0784989
OBJ38812_TMT10.txt	1	OBJ38812_TMT10.txt_1	129N	2A5A_MOUSE|Q6PD03	16.3489	KO_Uninfect_1	KO_Uninfect	NA	Model	NA	NA	Model	83463.5	985475	0.0846936
OBJ38812_TMT10.txt	1	OBJ38812_TMT10.txt_1	131C	2A5A_MOUSE|Q6PD03	16.397	KO_Uninfect_2	KO_Uninfect	NA	Model	NA	NA	Model	86295.1	985475	0.087567
OBJ38812_TMT10.txt	1	OBJ38812_TMT10.txt_1	126C	2A5A_MOUSE|Q6PD03	16.2916	WT_Early_1	WT_Early	NA	Model	NA	NA	Model	80218.1	985475	0.0814004
OBJ38812_TMT10.txt	1	OBJ38812_TMT10.txt_1	129C	2A5A_MOUSE|Q6PD03	16.3666	WT_Early_2	WT_Early	NA	Model	NA	NA	Model	84497.2	985475	0.0857426
OBJ38812_TMT10.txt	1	OBJ38812_TMT10.txt_1	127C	2A5A_MOUSE|Q6PD03	16.336	WT_Late_1	WT_Late	NA	Model	NA	NA	Model	82722.3	985475	0.0839416
OBJ38812_TMT10.txt	1	OBJ38812_TMT10.txt_1	130C	2A5A_MOUSE|Q6PD03	16.4452	WT_Late_2	WT_Late	NA	Model	NA	NA	Model	89230.5	985475	0.0905457
OBJ38812_TMT10.txt	1	OBJ38812_TMT10.txt_1	128C	2A5A_MOUSE|Q6PD03	16.2675	WT_Uninfect_1	WT_Uninfect	NA	Model	NA	NA	Model	78886.3	985475	0.080049
OBJ38812_TMT10_p2.txt	1	OBJ38812_TMT10_p2.txt_1	127N	2A5B_MOUSE|Q6PD28	15.8028	KO_Early_3	KO_Early	NA	Model	NA	NA	Model	57163.3	676391	0.0845122
OBJ38812_TMT10_p2.txt	1	OBJ38812_TMT10_p2.txt_1	130N	2A5B_MOUSE|Q6PD28	15.941	KO_Early_4	KO_Early	NA	Model	NA	NA	Model	62911.2	676391	0.0930101
OBJ38812_TMT10_p2.txt	1	OBJ38812_TMT10_p2.txt_1	128N	2A5B_MOUSE|Q6PD28	15.8353	KO_Late_3	KO_Late	NA	Model	NA	NA	Model	58465.6	676391	0.0864375
OBJ38812_TMT10_p2.txt	1	OBJ38812_TMT10_p2.txt_1	131N	2A5B_MOUSE|Q6PD28	15.732	KO_Late_4	KO_Late	NA	Model	NA	NA	Model	54427	676391	0.0804667
OBJ38812_TMT10_p2.txt	1	OBJ38812_TMT10_p2.txt_1	129N	2A5B_MOUSE|Q6PD28	15.7359	KO_Uninfect_3	KO_Uninfect	NA	Model	NA	NA	Model	54571.2	676391	0.08068
OBJ38812_TMT10_p2.txt	1	OBJ38812_TMT10_p2.txt_1	126C	2A5B_MOUSE|Q6PD28	15.7456	WT_Early_3	WT_Early	NA	Model	NA	NA	Model	54939.4	676391	0.0812243
OBJ38812_TMT10_p2.txt	1	OBJ38812_TMT10_p2.txt_1	129C	2A5B_MOUSE|Q6PD28	15.7512	WT_Early_4	WT_Early	NA	Model	NA	NA	Model	55156.3	676391	0.0815449
OBJ38812_TMT10_p2.txt	1	OBJ38812_TMT10_p2.txt_1	127C	2A5B_MOUSE|Q6PD28	15.5539	WT_Late_3	WT_Late	NA	Model	NA	NA	Model	48103.9	676391	0.0711185
OBJ38812_TMT10_p2.txt	1	OBJ38812_TMT10_p2.txt_1	130C	2A5B_MOUSE|Q6PD28	15.8133	WT_Late_4	WT_Late	NA	Model	NA	NA	Model	57578.8	676391	0.0851265
OBJ38812_TMT10_p2.txt	1	OBJ38812_TMT10_p2.txt_1	128C	2A5B_MOUSE|Q6PD28	15.7042	WT_Uninfect_3	WT_Uninfect	NA	Model	NA	NA	Model	53385.8	676391	0.0789274
OBJ38812_TMT10_p2.txt	1	OBJ38812_TMT10_p2.txt_1	131C	2A5B_MOUSE|Q6PD28	15.9689	WT_Uninfect_4	WT_Uninfect	NA	Model	NA	NA	Model	64138.4	676391	0.0948244
OBJ38812_TMT10.txt	1	OBJ38812_TMT10.txt_1	127N	2A5B_MOUSE|Q6PD28	15.724	KO_Early_1	KO_Early	NA	Model	NA	NA	Model	54125.3	669987	0.0807855
OBJ38812_TMT10.txt	1	OBJ38812_TMT10.txt_1	130N	2A5B_MOUSE|Q6PD28	15.9119	KO_Early_2	KO_Early	NA	Model	NA	NA	Model	61653.3	669987	0.0920216
OBJ38812_TMT10.txt	1	OBJ38812_TMT10.txt_1	128N	2A5B_MOUSE|Q6PD28	15.6709	KO_Late_1	KO_Late	NA	Model	NA	NA	Model	52168.2	669987	0.0778644
OBJ38812_TMT10.txt	1	OBJ38812_TMT10.txt_1	131N	2A5B_MOUSE|Q6PD28	15.8235	KO_Late_2	KO_Late	NA	Model	NA	NA	Model	57989.5	669987	0.0865532
OBJ38812_TMT10.txt	1	OBJ38812_TMT10.txt_1	129N	2A5B_MOUSE|Q6PD28	15.8215	KO_Uninfect_1	KO_Uninfect	NA	Model	NA	NA	Model	57908	669987	0.0864315
OBJ38812_TMT10.txt	1	OBJ38812_TMT10.txt_1	131C	2A5B_MOUSE|Q6PD28	15.8242	KO_Uninfect_2	KO_Uninfect	NA	Model	NA	NA	Model	58019.2	669987	0.0865975
OBJ38812_TMT10.txt	1	OBJ38812_TMT10.txt_1	126C	2A5B_MOUSE|Q6PD28	15.7631	WT_Early_1	WT_Early	NA	Model	NA	NA	Model	55610.6	669987	0.0830024
OBJ38812_TMT10.txt	1	OBJ38812_TMT10.txt_1	129C	2A5B_MOUSE|Q6PD28	15.8314	WT_Early_2	WT_Early	NA	Model	NA	NA	Model	58306.4	669987	0.0870261
OBJ38812_TMT10.txt	1	OBJ38812_TMT10.txt_1	127C	2A5B_MOUSE|Q6PD28	15.6595	WT_Late_1	WT_Late	NA	Model	NA	NA	Model	51758.7	669987	0.0772532
OBJ38812_TMT10.txt	1	OBJ38812_TMT10.txt_1	130C	2A5B_MOUSE|Q6PD28	15.7631	WT_Late_2	WT_Late	NA	Model	NA	NA	Model	55613.5	669987	0.0830068
OBJ38812_TMT10.txt	1	OBJ38812_TMT10.txt_1	128C	2A5B_MOUSE|Q6PD28	15.6462	WT_Uninfect_1	WT_Uninfect	NA	Model	NA	NA	Model	51284.2	669987	0.0765451
OBJ38812_TMT10_p2.txt	1	OBJ38812_TMT10_p2.txt_1	127N	2A5E_MOUSE|Q61151	14.9719	KO_Early_3	KO_Early	NA	Model	NA	NA	Model	32136.1	412029	0.0779947
OBJ38812_TMT10_p2.txt	1	OBJ38812_TMT10_p2.txt_1	130N	2A5E_MOUSE|Q61151	15.2077	KO_Early_4	KO_Early	NA	Model	NA	NA	Model	37842.6	412029	0.0918445
OBJ38812_TMT10_p2.txt	1	OBJ38812_TMT10_p2.txt_1	128N	2A5E_MOUSE|Q61151	14.9858	KO_Late_3	KO_Late	NA	Model	NA	NA	Model	32447.6	412029	0.0787508
OBJ38812_TMT10_p2.txt	1	OBJ38812_TMT10_p2.txt_1	131N	2A5E_MOUSE|Q61151	14.9852	KO_Late_4	KO_Late	NA	Model	NA	NA	Model	32434.7	412029	0.0787194
OBJ38812_TMT10_p2.txt	1	OBJ38812_TMT10_p2.txt_1	129N	2A5E_MOUSE|Q61151	15.1353	KO_Uninfect_3	KO_Uninfect	NA	Model	NA	NA	Model	35990.3	412029	0.087349
OBJ38812_TMT10_p2.txt	1	OBJ38812_TMT10_p2.txt_1	126C	2A5E_MOUSE|Q61151	15.0695	WT_Early_3	WT_Early	NA	Model	NA	NA	Model	34385.1	412029	0.083453
OBJ38812_TMT10_p2.txt	1	OBJ38812_TMT10_p2.txt_1	129C	2A5E_MOUSE|Q61151	15.14	WT_Early_4	WT_Early	NA	Model	NA	NA	Model	36107.5	412029	0.0876334
OBJ38812_TMT10_p2.txt	1	OBJ38812_TMT10_p2.txt_1	127C	2A5E_MOUSE|Q61151	15.0511	WT_Late_3	WT_Late	NA	Model	NA	NA	Model	33950.2	412029	0.0823975
OBJ38812_TMT10_p2.txt	1	OBJ38812_TMT10_p2.txt_1	130C	2A5E_MOUSE|Q61151	14.8128	WT_Late_4	WT_Late	NA	Model	NA	NA	Model	28780.2	412029	0.06985
OBJ38812_TMT10_p2.txt	1	OBJ38812_TMT10_p2.txt_1	128C	2A5E_MOUSE|Q61151	15.1041	WT_Uninfect_3	WT_Uninfect	NA	Model	NA	NA	Model	35221	412029	0.0854817
OBJ38812_TMT10_p2.txt	1	OBJ38812_TMT10_p2.txt_1	131C	2A5E_MOUSE|Q61151	15.2473	WT_Uninfect_4	WT_Uninfect	NA	Model	NA	NA	Model	38895.7	412029	0.0944004
OBJ38812_TMT10.txt	1	OBJ38812_TMT10.txt_1	127N	2A5E_MOUSE|Q61151	14.97	KO_Early_1	KO_Early	NA	Model	NA	NA	Model	32094.1	407615	0.0787363
OBJ38812_TMT10.txt	1	OBJ38812_TMT10.txt_1	130N	2A5E_MOUSE|Q61151	15.0007	KO_Early_2	KO_Early	NA	Model	NA	NA	Model	32783.7	407615	0.0804281
OBJ38812_TMT10.txt	1	OBJ38812_TMT10.txt_1	128N	2A5E_MOUSE|Q61151	14.8387	KO_Late_1	KO_Late	NA	Model	NA	NA	Model	29301	407615	0.071884
OBJ38812_TMT10.txt	1	OBJ38812_TMT10.txt_1	131N	2A5E_MOUSE|Q61151	14.8572	KO_Late_2	KO_Late	NA	Model	NA	NA	Model	29680	407615	0.0728137
OBJ38812_TMT10.txt	1	OBJ38812_TMT10.txt_1	129N	2A5E_MOUSE|Q61151	14.9924	KO_Uninfect_1	KO_Uninfect	NA	Model	NA	NA	Model	32595.4	407615	0.0799662
OBJ38812_TMT10.txt	1	OBJ38812_TMT10.txt_1	131C	2A5E_MOUSE|Q61151	15.0429	KO_Uninfect_2	KO_Uninfect	NA	Model	NA	NA	Model	33757.3	407615	0.0828166
OBJ38812_TMT10.txt	1	OBJ38812_TMT10.txt_1	126C	2A5E_MOUSE|Q61151	15.0874	WT_Early_1	WT_Early	NA	Model	NA	NA	Model	34813.9	407615	0.0854088
OBJ38812_TMT10.txt	1	OBJ38812_TMT10.txt_1	129C	2A5E_MOUSE|Q61151	15.2235	WT_Early_2	WT_Early	NA	Model	NA	NA	Model	38258.7	407615	0.0938598
OBJ38812_TMT10.txt	1	OBJ38812_TMT10.txt_1	127C	2A5E_MOUSE|Q61151	15.0113	WT_Late_1	WT_Late	NA	Model	NA	NA	Model	33025.5	407615	0.0810212
OBJ38812_TMT10.txt	1	OBJ38812_TMT10.txt_1	130C	2A5E_MOUSE|Q61151	15.2281	WT_Late_2	WT_Late	NA	Model	NA	NA	Model	38380.7	407615	0.0941593
OBJ38812_TMT10.txt	1	OBJ38812_TMT10.txt_1	128C	2A5E_MOUSE|Q61151	15.2544	WT_Uninfect_1	WT_Uninfect	NA	Model	NA	NA	Model	39086.7	407615	0.0958912
OBJ38812_TMT10_p2.txt	1	OBJ38812_TMT10_p2.txt_1	127N	2A5G_MOUSE|Q60996	15.4532	KO_Early_3	KO_Early	NA	Model	NA	NA	Model	44863.2	560993	0.079971
OBJ38812_TMT10_p2.txt	1	OBJ38812_TMT10_p2.txt_1	130N	2A5G_MOUSE|Q60996	15.4624	KO_Early_4	KO_Early	NA	Model	NA	NA	Model	45148.1	560993	0.0804789
OBJ38812_TMT10_p2.txt	1	OBJ38812_TMT10_p2.txt_1	128N	2A5G_MOUSE|Q60996	15.5127	KO_Late_3	KO_Late	NA	Model	NA	NA	Model	46752	560993	0.0833378
OBJ38812_TMT10_p2.txt	1	OBJ38812_TMT10_p2.txt_1	131N	2A5G_MOUSE|Q60996	15.2262	KO_Late_4	KO_Late	NA	Model	NA	NA	Model	38331.6	560993	0.068328
OBJ38812_TMT10_p2.txt	1	OBJ38812_TMT10_p2.txt_1	129N	2A5G_MOUSE|Q60996	15.5426	KO_Uninfect_3	KO_Uninfect	NA	Model	NA	NA	Model	47730.8	560993	0.0850826
OBJ38812_TMT10_p2.txt	1	OBJ38812_TMT10_p2.txt_1	126C	2A5G_MOUSE|Q60996	15.4923	WT_Early_3	WT_Early	NA	Model	NA	NA	Model	46093.1	560993	0.0821634
OBJ38812_TMT10_p2.txt	1	OBJ38812_TMT10_p2.txt_1	129C	2A5G_MOUSE|Q60996	15.5908	WT_Early_4	WT_Early	NA	Model	NA	NA	Model	49349.7	560993	0.0879685
OBJ38812_TMT10_p2.txt	1	OBJ38812_TMT10_p2.txt_1	127C	2A5G_MOUSE|Q60996	15.6409	WT_Late_3	WT_Late	NA	Model	NA	NA	Model	51096.5	560993	0.0910822
OBJ38812_TMT10_p2.txt	1	OBJ38812_TMT10_p2.txt_1	130C	2A5G_MOUSE|Q60996	15.4166	WT_Late_4	WT_Late	NA	Model	NA	NA	Model	43738.4	560993	0.0779659
OBJ38812_TMT10_p2.txt	1	OBJ38812_TMT10_p2.txt_1	128C	2A5G_MOUSE|Q60996	15.6491	WT_Uninfect_3	WT_Uninfect	NA	Model	NA	NA	Model	51387.5	560993	0.091601
OBJ38812_TMT10_p2.txt	1	OBJ38812_TMT10_p2.txt_1	131C	2A5G_MOUSE|Q60996	15.6155	WT_Uninfect_4	WT_Uninfect	NA	Model	NA	NA	Model	50203.5	560993	0.0894903
OBJ38812_TMT10.txt	1	OBJ38812_TMT10.txt_1	127N	2A5G_MOUSE|Q60996	15.4515	KO_Early_1	KO_Early	NA	Model	NA	NA	Model	44808.5	555240	0.0807012
OBJ38812_TMT10.txt	1	OBJ38812_TMT10.txt_1	130N	2A5G_MOUSE|Q60996	15.3466	KO_Early_2	KO_Early	NA	Model	NA	NA	Model	41666.5	555240	0.0750423
OBJ38812_TMT10.txt	1	OBJ38812_TMT10.txt_1	128N	2A5G_MOUSE|Q60996	15.4801	KO_Late_1	KO_Late	NA	Model	NA	NA	Model	45705.9	555240	0.0823174
OBJ38812_TMT10.txt	1	OBJ38812_TMT10.txt_1	131N	2A5G_MOUSE|Q60996	15.3308	KO_Late_2	KO_Late	NA	Model	NA	NA	Model	41212.8	555240	0.0742252
OBJ38812_TMT10.txt	1	OBJ38812_TMT10.txt_1	129N	2A5G_MOUSE|Q60996	15.4456	KO_Uninfect_1	KO_Uninfect	NA	Model	NA	NA	Model	44627.5	555240	0.0803752
OBJ38812_TMT10.txt	1	OBJ38812_TMT10.txt_1	131C	2A5G_MOUSE|Q60996	15.4501	KO_Uninfect_2	KO_Uninfect	NA	Model	NA	NA	Model	44765.3	555240	0.0806233
OBJ38812_TMT10.txt	1	OBJ38812_TMT10.txt_1	126C	2A5G_MOUSE|Q60996	15.61	WT_Early_1	WT_Early	NA	Model	NA	NA	Model	50014.1	555240	0.0900766
OBJ38812_TMT10.txt	1	OBJ38812_TMT10.txt_1	129C	2A5G_MOUSE|Q60996	15.6609	WT_Early_2	WT_Early	NA	Model	NA	NA	Model	51808.9	555240	0.093309
OBJ38812_TMT10.txt	1	OBJ38812_TMT10.txt_1	127C	2A5G_MOUSE|Q60996	15.5277	WT_Late_1	WT_Late	NA	Model	NA	NA	Model	47238.8	555240	0.0850781
OBJ38812_TMT10.txt	1	OBJ38812_TMT10.txt_1	130C	2A5G_MOUSE|Q60996	15.5932	WT_Late_2	WT_Late	NA	Model	NA	NA	Model	49432.4	555240	0.0890289
OBJ38812_TMT10.txt	1	OBJ38812_TMT10.txt_1	128C	2A5G_MOUSE|Q60996	15.5405	WT_Uninfect_1	WT_Uninfect	NA	Model	NA	NA	Model	47660.2	555240	0.0858371
OBJ38812_TMT10_p2.txt	1	OBJ38812_TMT10_p2.txt_1	127N	2A5G_MOUSE|Q60996-3	14.8475	KO_Early_3	KO_Early	NA	Model	NA	NA	Model	29481.8	422660	0.069753
OBJ38812_TMT10_p2.txt	1	OBJ38812_TMT10_p2.txt_1	130N	2A5G_MOUSE|Q60996-3	14.919	KO_Early_4	KO_Early	NA	Model	NA	NA	Model	30979.4	422660	0.0732964
OBJ38812_TMT10_p2.txt	1	OBJ38812_TMT10_p2.txt_1	128N	2A5G_MOUSE|Q60996-3	14.8863	KO_Late_3	KO_Late	NA	Model	NA	NA	Model	30284.8	422660	0.071653
OBJ38812_TMT10_p2.txt	1	OBJ38812_TMT10_p2.txt_1	131N	2A5G_MOUSE|Q60996-3	15.014	KO_Late_4	KO_Late	NA	Model	NA	NA	Model	33086.7	422660	0.0782821
OBJ38812_TMT10_p2.txt	1	OBJ38812_TMT10_p2.txt_1	129N	2A5G_MOUSE|Q60996-3	15.0312	KO_Uninfect_3	KO_Uninfect	NA	Model	NA	NA	Model	33485.1	422660	0.0792248
OBJ38812_TMT10_p2.txt	1	OBJ38812_TMT10_p2.txt_1	126C	2A5G_MOUSE|Q60996-3	15.2331	WT_Early_3	WT_Early	NA	Model	NA	NA	Model	38515.1	422660	0.0911256
OBJ38812_TMT10_p2.txt	1	OBJ38812_TMT10_p2.txt_1	129C	2A5G_MOUSE|Q60996-3	14.8427	WT_Early_4	WT_Early	NA	Model	NA	NA	Model	29382.5	422660	0.0695182
OBJ38812_TMT10_p2.txt	1	OBJ38812_TMT10_p2.txt_1	127C	2A5G_MOUSE|Q60996-3	15.3795	WT_Late_3	WT_Late	NA	Model	NA	NA	Model	42628.1	422660	0.100857
OBJ38812_TMT10_p2.txt	1	OBJ38812_TMT10_p2.txt_1	130C	2A5G_MOUSE|Q60996-3	14.7354	WT_Late_4	WT_Late	NA	Model	NA	NA	Model	27276.7	422660	0.0645359
OBJ38812_TMT10_p2.txt	1	OBJ38812_TMT10_p2.txt_1	128C	2A5G_MOUSE|Q60996-3	15.4387	WT_Uninfect_3	WT_Uninfect	NA	Model	NA	NA	Model	44414.6	422660	0.105084
OBJ38812_TMT10_p2.txt	1	OBJ38812_TMT10_p2.txt_1	131C	2A5G_MOUSE|Q60996-3	15.5982	WT_Uninfect_4	WT_Uninfect	NA	Model	NA	NA	Model	49604.4	422660	0.117362
OBJ38812_TMT10_p2.txt	1	OBJ38812_TMT10_p2.txt_1	127N	2AAA_MOUSE|Q76MZ3	17.2898	KO_Early_3	KO_Early	NA	Model	NA	NA	Model	160227	2.23745e+06	0.0716116
OBJ38812_TMT10_p2.txt	1	OBJ38812_TMT10_p2.txt_1	130N	2AAA_MOUSE|Q76MZ3	17.5422	KO_Early_4	KO_Early	NA	Model	NA	NA	Model	190870	2.23745e+06	0.0853068
OBJ38812_TMT10_p2.txt	1	OBJ38812_TMT10_p2.txt_1	128N	2AAA_MOUSE|Q76MZ3	17.292	KO_Late_3	KO_Late	NA	Model	NA	NA	Model	160480	2.23745e+06	0.0717246
OBJ38812_TMT10_p2.txt	1	OBJ38812_TMT10_p2.txt_1	131N	2AAA_MOUSE|Q76MZ3	17.3938	KO_Late_4	KO_Late	NA	Model	NA	NA	Model	172208	2.23745e+06	0.0769663
OBJ38812_TMT10_p2.txt	1	OBJ38812_TMT10_p2.txt_1	129N	2AAA_MOUSE|Q76MZ3	17.5672	KO_Uninfect_3	KO_Uninfect	NA	Model	NA	NA	Model	194204	2.23745e+06	0.0867969
OBJ38812_TMT10_p2.txt	1	OBJ38812_TMT10_p2.txt_1	126C	2AAA_MOUSE|Q76MZ3	17.5174	WT_Early_3	WT_Early	NA	Model	NA	NA	Model	187614	2.23745e+06	0.0838517
OBJ38812_TMT10_p2.txt	1	OBJ38812_TMT10_p2.txt_1	129C	2AAA_MOUSE|Q76MZ3	17.6856	WT_Early_4	WT_Early	NA	Model	NA	NA	Model	210808	2.23745e+06	0.0942179
OBJ38812_TMT10_p2.txt	1	OBJ38812_TMT10_p2.txt_1	127C	2AAA_MOUSE|Q76MZ3	17.6242	WT_Late_3	WT_Late	NA	Model	NA	NA	Model	202034	2.23745e+06	0.0902966
OBJ38812_TMT10_p2.txt	1	OBJ38812_TMT10_p2.txt_1	130C	2AAA_MOUSE|Q76MZ3	17.6592	WT_Late_4	WT_Late	NA	Model	NA	NA	Model	206995	2.23745e+06	0.0925137
OBJ38812_TMT10_p2.txt	1	OBJ38812_TMT10_p2.txt_1	128C	2AAA_MOUSE|Q76MZ3	17.3706	WT_Uninfect_3	WT_Uninfect	NA	Model	NA	NA	Model	169456	2.23745e+06	0.0757362
OBJ38812_TMT10_p2.txt	1	OBJ38812_TMT10_p2.txt_1	131C	2AAA_MOUSE|Q76MZ3	17.5947	WT_Uninfect_4	WT_Uninfect	NA	Model	NA	NA	Model	197934	2.23745e+06	0.088464
OBJ38812_TMT10.txt	1	OBJ38812_TMT10.txt_1	127N	2AAA_MOUSE|Q76MZ3	17.5123	KO_Early_1	KO_Early	NA	Model	NA	NA	Model	186955	2.21512e+06	0.0843995
OBJ38812_TMT10.txt	1	OBJ38812_TMT10.txt_1	130N	2AAA_MOUSE|Q76MZ3	17.4608	KO_Early_2	KO_Early	NA	Model	NA	NA	Model	180391	2.21512e+06	0.0814362
OBJ38812_TMT10.txt	1	OBJ38812_TMT10.txt_1	128N	2AAA_MOUSE|Q76MZ3	17.3933	KO_Late_1	KO_Late	NA	Model	NA	NA	Model	172146	2.21512e+06	0.0777139
OBJ38812_TMT10.txt	1	OBJ38812_TMT10.txt_1	131N	2AAA_MOUSE|Q76MZ3	17.448	KO_Late_2	KO_Late	NA	Model	NA	NA	Model	178799	2.21512e+06	0.0807175
OBJ38812_TMT10.txt	1	OBJ38812_TMT10.txt_1	129N	2AAA_MOUSE|Q76MZ3	17.5642	KO_Uninfect_1	KO_Uninfect	NA	Model	NA	NA	Model	193796	2.21512e+06	0.0874876
OBJ38812_TMT10.txt	1	OBJ38812_TMT10.txt_1	131C	2AAA_MOUSE|Q76MZ3	17.4805	KO_Uninfect_2	KO_Uninfect	NA	Model	NA	NA	Model	182878	2.21512e+06	0.0825586
OBJ38812_TMT10.txt	1	OBJ38812_TMT10.txt_1	126C	2AAA_MOUSE|Q76MZ3	17.604	WT_Early_1	WT_Early	NA	Model	NA	NA	Model	199219	2.21512e+06	0.0899358
OBJ38812_TMT10.txt	1	OBJ38812_TMT10.txt_1	129C	2AAA_MOUSE|Q76MZ3	17.5113	WT_Early_2	WT_Early	NA	Model	NA	NA	Model	186826	2.21512e+06	0.0843412
OBJ38812_TMT10.txt	1	OBJ38812_TMT10.txt_1	127C	2AAA_MOUSE|Q76MZ3	17.4694	WT_Late_1	WT_Late	NA	Model	NA	NA	Model	181472	2.21512e+06	0.0819243
OBJ38812_TMT10.txt	1	OBJ38812_TMT10.txt_1	130C	2AAA_MOUSE|Q76MZ3	17.4989	WT_Late_2	WT_Late	NA	Model	NA	NA	Model	185227	2.21512e+06	0.0836192
OBJ38812_TMT10.txt	1	OBJ38812_TMT10.txt_1	128C	2AAA_MOUSE|Q76MZ3	17.4799	WT_Uninfect_1	WT_Uninfect	NA	Model	NA	NA	Model	182794	2.21512e+06	0.0825207
OBJ38812_TMT10_p2.txt	1	OBJ38812_TMT10_p2.txt_1	127N	2AAB_MOUSE|Q7TNP2	15.8569	KO_Early_3	KO_Early	NA	Model	NA	NA	Model	59348.1	736648	0.080565
OBJ38812_TMT10_p2.txt	1	OBJ38812_TMT10_p2.txt_1	130N	2AAB_MOUSE|Q7TNP2	15.7661	KO_Early_4	KO_Early	NA	Model	NA	NA	Model	55727.9	736648	0.0756506
OBJ38812_TMT10_p2.txt	1	OBJ38812_TMT10_p2.txt_1	128N	2AAB_MOUSE|Q7TNP2	15.8535	KO_Late_3	KO_Late	NA	Model	NA	NA	Model	59208.3	736648	0.0803752
OBJ38812_TMT10_p2.txt	1	OBJ38812_TMT10_p2.txt_1	131N	2AAB_MOUSE|Q7TNP2	15.8144	KO_Late_4	KO_Late	NA	Model	NA	NA	Model	57623.8	736648	0.0782243
OBJ38812_TMT10_p2.txt	1	OBJ38812_TMT10_p2.txt_1	129N	2AAB_MOUSE|Q7TNP2	15.9686	KO_Uninfect_3	KO_Uninfect	NA	Model	NA	NA	Model	64125.1	736648	0.0870498
OBJ38812_TMT10_p2.txt	1	OBJ38812_TMT10_p2.txt_1	126C	2AAB_MOUSE|Q7TNP2	15.9589	WT_Early_3	WT_Early	NA	Model	NA	NA	Model	63694.9	736648	0.0864657
OBJ38812_TMT10_p2.txt	1	OBJ38812_TMT10_p2.txt_1	129C	2AAB_MOUSE|Q7TNP2	15.965	WT_Early_4	WT_Early	NA	Model	NA	NA	Model	63964.6	736648	0.086832
OBJ38812_TMT10_p2.txt	1	OBJ38812_TMT10_p2.txt_1	127C	2AAB_MOUSE|Q7TNP2	16.1669	WT_Late_3	WT_Late	NA	Model	NA	NA	Model	73574.9	736648	0.0998779
OBJ38812_TMT10_p2.txt	1	OBJ38812_TMT10_p2.txt_1	130C	2AAB_MOUSE|Q7TNP2	15.9867	WT_Late_4	WT_Late	NA	Model	NA	NA	Model	64935.8	736648	0.0881504
OBJ38812_TMT10_p2.txt	1	OBJ38812_TMT10_p2.txt_1	128C	2AAB_MOUSE|Q7TNP2	15.7516	WT_Uninfect_3	WT_Uninfect	NA	Model	NA	NA	Model	55171.7	736648	0.0748956
OBJ38812_TMT10_p2.txt	1	OBJ38812_TMT10_p2.txt_1	131C	2AAB_MOUSE|Q7TNP2	15.8175	WT_Uninfect_4	WT_Uninfect	NA	Model	NA	NA	Model	57749	736648	0.0783943
OBJ38812_TMT10.txt	1	OBJ38812_TMT10.txt_1	127N	2AAB_MOUSE|Q7TNP2	15.8261	KO_Early_1	KO_Early	NA	Model	NA	NA	Model	58092.5	735146	0.0790217
OBJ38812_TMT10.txt	1	OBJ38812_TMT10.txt_1	130N	2AAB_MOUSE|Q7TNP2	15.9795	KO_Early_2	KO_Early	NA	Model	NA	NA	Model	64609.9	735146	0.0878872
OBJ38812_TMT10.txt	1	OBJ38812_TMT10.txt_1	128N	2AAB_MOUSE|Q7TNP2	15.7199	KO_Late_1	KO_Late	NA	Model	NA	NA	Model	53970	735146	0.073414
OBJ38812_TMT10.txt	1	OBJ38812_TMT10.txt_1	131N	2AAB_MOUSE|Q7TNP2	15.8252	KO_Late_2	KO_Late	NA	Model	NA	NA	Model	58057.5	735146	0.0789742
OBJ38812_TMT10.txt	1	OBJ38812_TMT10.txt_1	129N	2AAB_MOUSE|Q7TNP2	15.8854	KO_Uninfect_1	KO_Uninfect	NA	Model	NA	NA	Model	60529.7	735146	0.0823371
OBJ38812_TMT10.txt	1	OBJ38812_TMT10.txt_1	131C	2AAB_MOUSE|Q7TNP2	15.8007	KO_Uninfect_2	KO_Uninfect	NA	Model	NA	NA	Model	57080.4	735146	0.077645
OBJ38812_TMT10.txt	1	OBJ38812_TMT10.txt_1	126C	2AAB_MOUSE|Q7TNP2	16.0179	WT_Early_1	WT_Early	NA	Model	NA	NA	Model	66353.6	735146	0.0902592
OBJ38812_TMT10.txt	1	OBJ38812_TMT10.txt_1	129C	2AAB_MOUSE|Q7TNP2	15.9136	WT_Early_2	WT_Early	NA	Model	NA	NA	Model	61727.4	735146	0.0839662
OBJ38812_TMT10.txt	1	OBJ38812_TMT10.txt_1	127C	2AAB_MOUSE|Q7TNP2	15.8967	WT_Late_1	WT_Late	NA	Model	NA	NA	Model	61007.4	735146	0.0829868
OBJ38812_TMT10.txt	1	OBJ38812_TMT10.txt_1	130C	2AAB_MOUSE|Q7TNP2	16.0043	WT_Late_2	WT_Late	NA	Model	NA	NA	Model	65731.7	735146	0.0894131
OBJ38812_TMT10.txt	1	OBJ38812_TMT10.txt_1	128C	2AAB_MOUSE|Q7TNP2	16.0202	WT_Uninfect_1	WT_Uninfect	NA	Model	NA	NA	Model	66461.3	735146	0.0904056
OBJ38812_TMT10_p2.txt	1	OBJ38812_TMT10_p2.txt_1	127N	2ABA_MOUSE|Q6P1F6	16.9546	KO_Early_3	KO_Early	NA	Model	NA	NA	Model	127009	1.63055e+06	0.0778936
OBJ38812_TMT10_p2.txt	1	OBJ38812_TMT10_p2.txt_1	130N	2ABA_MOUSE|Q6P1F6	16.9749	KO_Early_4	KO_Early	NA	Model	NA	NA	Model	128814	1.63055e+06	0.0790007
OBJ38812_TMT10_p2.txt	1	OBJ38812_TMT10_p2.txt_1	128N	2ABA_MOUSE|Q6P1F6	16.9368	KO_Late_3	KO_Late	NA	Model	NA	NA	Model	125456	1.63055e+06	0.0769412
OBJ38812_TMT10_p2.txt	1	OBJ38812_TMT10_p2.txt_1	131N	2ABA_MOUSE|Q6P1F6	16.9424	KO_Late_4	KO_Late	NA	Model	NA	NA	Model	125942	1.63055e+06	0.0772392
OBJ38812_TMT10_p2.txt	1	OBJ38812_TMT10_p2.txt_1	129N	2ABA_MOUSE|Q6P1F6	17.1332	KO_Uninfect_3	KO_Uninfect	NA	Model	NA	NA	Model	143754	1.63055e+06	0.0881628
OBJ38812_TMT10_p2.txt	1	OBJ38812_TMT10_p2.txt_1	126C	2ABA_MOUSE|Q6P1F6	16.9467	WT_Early_3	WT_Early	NA	Model	NA	NA	Model	126315	1.63055e+06	0.0774677
OBJ38812_TMT10_p2.txt	1	OBJ38812_TMT10_p2.txt_1	129C	2ABA_MOUSE|Q6P1F6	17.2154	WT_Early_4	WT_Early	NA	Model	NA	NA	Model	152177	1.63055e+06	0.0933289
OBJ38812_TMT10_p2.txt	1	OBJ38812_TMT10_p2.txt_1	127C	2ABA_MOUSE|Q6P1F6	17.0697	WT_Late_3	WT_Late	NA	Model	NA	NA	Model	137560	1.63055e+06	0.0843644
OBJ38812_TMT10_p2.txt	1	OBJ38812_TMT10_p2.txt_1	130C	2ABA_MOUSE|Q6P1F6	17.3605	WT_Late_4	WT_Late	NA	Model	NA	NA	Model	168275	1.63055e+06	0.103201
OBJ38812_TMT10_p2.txt	1	OBJ38812_TMT10_p2.txt_1	128C	2ABA_MOUSE|Q6P1F6	16.8846	WT_Uninfect_3	WT_Uninfect	NA	Model	NA	NA	Model	120994	1.63055e+06	0.0742048
OBJ38812_TMT10_p2.txt	1	OBJ38812_TMT10_p2.txt_1	131C	2ABA_MOUSE|Q6P1F6	17.088	WT_Uninfect_4	WT_Uninfect	NA	Model	NA	NA	Model	139318	1.63055e+06	0.0854426
OBJ38812_TMT10.txt	1	OBJ38812_TMT10.txt_1	127N	2ABA_MOUSE|Q6P1F6	17.1219	KO_Early_1	KO_Early	NA	Model	NA	NA	Model	142627	1.61773e+06	0.0881653
OBJ38812_TMT10.txt	1	OBJ38812_TMT10.txt_1	130N	2ABA_MOUSE|Q6P1F6	17.0274	KO_Early_2	KO_Early	NA	Model	NA	NA	Model	133586	1.61773e+06	0.0825763
OBJ38812_TMT10.txt	1	OBJ38812_TMT10.txt_1	128N	2ABA_MOUSE|Q6P1F6	17.0918	KO_Late_1	KO_Late	NA	Model	NA	NA	Model	139683	1.61773e+06	0.0863451
OBJ38812_TMT10.txt	1	OBJ38812_TMT10.txt_1	131N	2ABA_MOUSE|Q6P1F6	17.0826	KO_Late_2	KO_Late	NA	Model	NA	NA	Model	138798	1.61773e+06	0.0857983
OBJ38812_TMT10.txt	1	OBJ38812_TMT10.txt_1	129N	2ABA_MOUSE|Q6P1F6	16.9593	KO_Uninfect_1	KO_Uninfect	NA	Model	NA	NA	Model	127424	1.61773e+06	0.0787676
OBJ38812_TMT10.txt	1	OBJ38812_TMT10.txt_1	131C	2ABA_MOUSE|Q6P1F6	17.0161	KO_Uninfect_2	KO_Uninfect	NA	Model	NA	NA	Model	132547	1.61773e+06	0.081934
OBJ38812_TMT10.txt	1	OBJ38812_TMT10.txt_1	126C	2ABA_MOUSE|Q6P1F6	17.0552	WT_Early_1	WT_Early	NA	Model	NA	NA	Model	136181	1.61773e+06	0.0841807
OBJ38812_TMT10.txt	1	OBJ38812_TMT10.txt_1	129C	2ABA_MOUSE|Q6P1F6	17.0117	WT_Early_2	WT_Early	NA	Model	NA	NA	Model	132141	1.61773e+06	0.081683
OBJ38812_TMT10.txt	1	OBJ38812_TMT10.txt_1	127C	2ABA_MOUSE|Q6P1F6	17.0592	WT_Late_1	WT_Late	NA	Model	NA	NA	Model	136562	1.61773e+06	0.084416
OBJ38812_TMT10.txt	1	OBJ38812_TMT10.txt_1	130C	2ABA_MOUSE|Q6P1F6	17.0637	WT_Late_2	WT_Late	NA	Model	NA	NA	Model	136990	1.61773e+06	0.0846809
OBJ38812_TMT10.txt	1	OBJ38812_TMT10.txt_1	128C	2ABA_MOUSE|Q6P1F6	16.946	WT_Uninfect_1	WT_Uninfect	NA	Model	NA	NA	Model	126254	1.61773e+06	0.078044
OBJ38812_TMT10_p2.txt	1	OBJ38812_TMT10_p2.txt_1	127N	3BP1_MOUSE|P55194	15.1885	KO_Early_3	KO_Early	NA	Model	NA	NA	Model	37342.7	391359	0.095418
OBJ38812_TMT10_p2.txt	1	OBJ38812_TMT10_p2.txt_1	130N	3BP1_MOUSE|P55194	15.0849	KO_Early_4	KO_Early	NA	Model	NA	NA	Model	34753.9	391359	0.088803
OBJ38812_TMT10_p2.txt	1	OBJ38812_TMT10_p2.txt_1	128N	3BP1_MOUSE|P55194	15.1313	KO_Late_3	KO_Late	NA	Model	NA	NA	Model	35889.8	391359	0.0917056
OBJ38812_TMT10_p2.txt	1	OBJ38812_TMT10_p2.txt_1	131N	3BP1_MOUSE|P55194	15.0425	KO_Late_4	KO_Late	NA	Model	NA	NA	Model	33748.7	391359	0.0862345
OBJ38812_TMT10_p2.txt	1	OBJ38812_TMT10_p2.txt_1	129N	3BP1_MOUSE|P55194	15.1516	KO_Uninfect_3	KO_Uninfect	NA	Model	NA	NA	Model	36398.1	391359	0.0930043
OBJ38812_TMT10_p2.txt	1	OBJ38812_TMT10_p2.txt_1	126C	3BP1_MOUSE|P55194	14.9264	WT_Early_3	WT_Early	NA	Model	NA	NA	Model	31138.8	391359	0.0795657
OBJ38812_TMT10_p2.txt	1	OBJ38812_TMT10_p2.txt_1	129C	3BP1_MOUSE|P55194	14.9382	WT_Early_4	WT_Early	NA	Model	NA	NA	Model	31393.7	391359	0.0802171
OBJ38812_TMT10_p2.txt	1	OBJ38812_TMT10_p2.txt_1	127C	3BP1_MOUSE|P55194	14.8396	WT_Late_3	WT_Late	NA	Model	NA	NA	Model	29319.8	391359	0.0749178
OBJ38812_TMT10_p2.txt	1	OBJ38812_TMT10_p2.txt_1	130C	3BP1_MOUSE|P55194	14.8993	WT_Late_4	WT_Late	NA	Model	NA	NA	Model	30559	391359	0.0780844
OBJ38812_TMT10_p2.txt	1	OBJ38812_TMT10_p2.txt_1	128C	3BP1_MOUSE|P55194	14.581	WT_Uninfect_3	WT_Uninfect	NA	Model	NA	NA	Model	24508.4	391359	0.0626238
OBJ38812_TMT10_p2.txt	1	OBJ38812_TMT10_p2.txt_1	131C	3BP1_MOUSE|P55194	15.0544	WT_Uninfect_4	WT_Uninfect	NA	Model	NA	NA	Model	34026.8	391359	0.0869453
OBJ38812_TMT10.txt	1	OBJ38812_TMT10.txt_1	127N	3BP1_MOUSE|P55194	15.0304	KO_Early_1	KO_Early	NA	Model	NA	NA	Model	33465.6	390488	0.085702
OBJ38812_TMT10.txt	1	OBJ38812_TMT10.txt_1	130N	3BP1_MOUSE|P55194	15.1603	KO_Early_2	KO_Early	NA	Model	NA	NA	Model	36619.4	390488	0.0937787
OBJ38812_TMT10.txt	1	OBJ38812_TMT10.txt_1	128N	3BP1_MOUSE|P55194	14.9335	KO_Late_1	KO_Late	NA	Model	NA	NA	Model	31292.2	390488	0.0801363
OBJ38812_TMT10.txt	1	OBJ38812_TMT10.txt_1	131N	3BP1_MOUSE|P55194	15.0825	KO_Late_2	KO_Late	NA	Model	NA	NA	Model	34697	390488	0.0888555
OBJ38812_TMT10.txt	1	OBJ38812_TMT10.txt_1	129N	3BP1_MOUSE|P55194	15.0766	KO_Uninfect_1	KO_Uninfect	NA	Model	NA	NA	Model	34555.7	390488	0.0884936
OBJ38812_TMT10.txt	1	OBJ38812_TMT10.txt_1	131C	3BP1_MOUSE|P55194	15.0812	KO_Uninfect_2	KO_Uninfect	NA	Model	NA	NA	Model	34665.4	390488	0.0887746
OBJ38812_TMT10.txt	1	OBJ38812_TMT10.txt_1	126C	3BP1_MOUSE|P55194	14.8537	WT_Early_1	WT_Early	NA	Model	NA	NA	Model	29607.7	390488	0.0758223
OBJ38812_TMT10.txt	1	OBJ38812_TMT10.txt_1	129C	3BP1_MOUSE|P55194	14.9594	WT_Early_2	WT_Early	NA	Model	NA	NA	Model	31857.8	390488	0.0815847
OBJ38812_TMT10.txt	1	OBJ38812_TMT10.txt_1	127C	3BP1_MOUSE|P55194	14.8808	WT_Late_1	WT_Late	NA	Model	NA	NA	Model	30169.9	390488	0.0772622
OBJ38812_TMT10.txt	1	OBJ38812_TMT10.txt_1	130C	3BP1_MOUSE|P55194	14.912	WT_Late_2	WT_Late	NA	Model	NA	NA	Model	30828.2	390488	0.078948
OBJ38812_TMT10.txt	1	OBJ38812_TMT10.txt_1	128C	3BP1_MOUSE|P55194	14.8941	WT_Uninfect_1	WT_Uninfect	NA	Model	NA	NA	Model	30449.2	390488	0.0779774
OBJ38812_TMT10_p2.txt	1	OBJ38812_TMT10_p2.txt_1	127N	3BP2_MOUSE|Q06649	16.0169	KO_Early_3	KO_Early	NA	Model	NA	NA	Model	66307	739906	0.0896155
OBJ38812_TMT10_p2.txt	1	OBJ38812_TMT10_p2.txt_1	130N	3BP2_MOUSE|Q06649	16.0656	KO_Early_4	KO_Early	NA	Model	NA	NA	Model	68585.2	739906	0.0926945
OBJ38812_TMT10_p2.txt	1	OBJ38812_TMT10_p2.txt_1	128N	3BP2_MOUSE|Q06649	15.9185	KO_Late_3	KO_Late	NA	Model	NA	NA	Model	61937.3	739906	0.0837097
OBJ38812_TMT10_p2.txt	1	OBJ38812_TMT10_p2.txt_1	131N	3BP2_MOUSE|Q06649	15.9243	KO_Late_4	KO_Late	NA	Model	NA	NA	Model	62184.5	739906	0.0840438
OBJ38812_TMT10_p2.txt	1	OBJ38812_TMT10_p2.txt_1	129N	3BP2_MOUSE|Q06649	15.8312	KO_Uninfect_3	KO_Uninfect	NA	Model	NA	NA	Model	58299.9	739906	0.0787937
OBJ38812_TMT10_p2.txt	1	OBJ38812_TMT10_p2.txt_1	126C	3BP2_MOUSE|Q06649	15.9048	WT_Early_3	WT_Early	NA	Model	NA	NA	Model	61349.1	739906	0.0829148
OBJ38812_TMT10_p2.txt	1	OBJ38812_TMT10_p2.txt_1	129C	3BP2_MOUSE|Q06649	15.9715	WT_Early_4	WT_Early	NA	Model	NA	NA	Model	64252.3	739906	0.0868384
OBJ38812_TMT10_p2.txt	1	OBJ38812_TMT10_p2.txt_1	127C	3BP2_MOUSE|Q06649	15.8579	WT_Late_3	WT_Late	NA	Model	NA	NA	Model	59386.6	739906	0.0802624
OBJ38812_TMT10_p2.txt	1	OBJ38812_TMT10_p2.txt_1	130C	3BP2_MOUSE|Q06649	15.8834	WT_Late_4	WT_Late	NA	Model	NA	NA	Model	60445.8	739906	0.0816938
OBJ38812_TMT10_p2.txt	1	OBJ38812_TMT10_p2.txt_1	128C	3BP2_MOUSE|Q06649	15.7359	WT_Uninfect_3	WT_Uninfect	NA	Model	NA	NA	Model	54571.4	739906	0.0737545
OBJ38812_TMT10_p2.txt	1	OBJ38812_TMT10_p2.txt_1	131C	3BP2_MOUSE|Q06649	15.8959	WT_Uninfect_4	WT_Uninfect	NA	Model	NA	NA	Model	60972.6	739906	0.0824059
OBJ38812_TMT10.txt	1	OBJ38812_TMT10.txt_1	127N	3BP2_MOUSE|Q06649	16.0464	KO_Early_1	KO_Early	NA	Model	NA	NA	Model	67678.3	750472	0.0901809
OBJ38812_TMT10.txt	1	OBJ38812_TMT10.txt_1	130N	3BP2_MOUSE|Q06649	16.0814	KO_Early_2	KO_Early	NA	Model	NA	NA	Model	69341.1	750472	0.0923966
OBJ38812_TMT10.txt	1	OBJ38812_TMT10.txt_1	128N	3BP2_MOUSE|Q06649	15.7757	KO_Late_1	KO_Late	NA	Model	NA	NA	Model	56098.2	750472	0.0747505
OBJ38812_TMT10.txt	1	OBJ38812_TMT10.txt_1	131N	3BP2_MOUSE|Q06649	16.0121	KO_Late_2	KO_Late	NA	Model	NA	NA	Model	66088	750472	0.0880618
OBJ38812_TMT10.txt	1	OBJ38812_TMT10.txt_1	129N	3BP2_MOUSE|Q06649	15.9414	KO_Uninfect_1	KO_Uninfect	NA	Model	NA	NA	Model	62927.7	750472	0.0838508
OBJ38812_TMT10.txt	1	OBJ38812_TMT10.txt_1	131C	3BP2_MOUSE|Q06649	16.113	KO_Uninfect_2	KO_Uninfect	NA	Model	NA	NA	Model	70875.7	750472	0.0944415
OBJ38812_TMT10.txt	1	OBJ38812_TMT10.txt_1	126C	3BP2_MOUSE|Q06649	15.9152	WT_Early_1	WT_Early	NA	Model	NA	NA	Model	61793.8	750472	0.0823399
OBJ38812_TMT10.txt	1	OBJ38812_TMT10.txt_1	129C	3BP2_MOUSE|Q06649	15.9297	WT_Early_2	WT_Early	NA	Model	NA	NA	Model	62418.7	750472	0.0831725
OBJ38812_TMT10.txt	1	OBJ38812_TMT10.txt_1	127C	3BP2_MOUSE|Q06649	15.7252	WT_Late_1	WT_Late	NA	Model	NA	NA	Model	54170	750472	0.0721812
OBJ38812_TMT10.txt	1	OBJ38812_TMT10.txt_1	130C	3BP2_MOUSE|Q06649	15.8812	WT_Late_2	WT_Late	NA	Model	NA	NA	Model	60357.1	750472	0.0804255
OBJ38812_TMT10.txt	1	OBJ38812_TMT10.txt_1	128C	3BP2_MOUSE|Q06649	15.8014	WT_Uninfect_1	WT_Uninfect	NA	Model	NA	NA	Model	57109.6	750472	0.0760982
OBJ38812_TMT10_p2.txt	1	OBJ38812_TMT10_p2.txt_1	127N	3BP5_MOUSE|Q9Z131	16.0096	KO_Early_3	KO_Early	NA	Model	NA	NA	Model	65972.5	807892	0.08166
OBJ38812_TMT10_p2.txt	1	OBJ38812_TMT10_p2.txt_1	130N	3BP5_MOUSE|Q9Z131	15.9548	KO_Early_4	KO_Early	NA	Model	NA	NA	Model	63513.9	807892	0.0786168
OBJ38812_TMT10_p2.txt	1	OBJ38812_TMT10_p2.txt_1	128N	3BP5_MOUSE|Q9Z131	15.7646	KO_Late_3	KO_Late	NA	Model	NA	NA	Model	55670.4	807892	0.0689083
OBJ38812_TMT10_p2.txt	1	OBJ38812_TMT10_p2.txt_1	131N	3BP5_MOUSE|Q9Z131	15.8752	KO_Late_4	KO_Late	NA	Model	NA	NA	Model	60105.8	807892	0.0743983
OBJ38812_TMT10_p2.txt	1	OBJ38812_TMT10_p2.txt_1	129N	3BP5_MOUSE|Q9Z131	16.3083	KO_Uninfect_3	KO_Uninfect	NA	Model	NA	NA	Model	81147.3	807892	0.100443
OBJ38812_TMT10_p2.txt	1	OBJ38812_TMT10_p2.txt_1	126C	3BP5_MOUSE|Q9Z131	15.9008	WT_Early_3	WT_Early	NA	Model	NA	NA	Model	61181.9	807892	0.0757303
OBJ38812_TMT10_p2.txt	1	OBJ38812_TMT10_p2.txt_1	129C	3BP5_MOUSE|Q9Z131	15.9793	WT_Early_4	WT_Early	NA	Model	NA	NA	Model	64602.2	807892	0.0799639
OBJ38812_TMT10_p2.txt	1	OBJ38812_TMT10_p2.txt_1	127C	3BP5_MOUSE|Q9Z131	16.0536	WT_Late_3	WT_Late	NA	Model	NA	NA	Model	68018.1	807892	0.0841921
OBJ38812_TMT10_p2.txt	1	OBJ38812_TMT10_p2.txt_1	130C	3BP5_MOUSE|Q9Z131	15.9628	WT_Late_4	WT_Late	NA	Model	NA	NA	Model	63865.6	807892	0.0790521
OBJ38812_TMT10_p2.txt	1	OBJ38812_TMT10_p2.txt_1	128C	3BP5_MOUSE|Q9Z131	15.9397	WT_Uninfect_3	WT_Uninfect	NA	Model	NA	NA	Model	62854.5	807892	0.0778006
OBJ38812_TMT10_p2.txt	1	OBJ38812_TMT10_p2.txt_1	131C	3BP5_MOUSE|Q9Z131	16.5591	WT_Uninfect_4	WT_Uninfect	NA	Model	NA	NA	Model	96555.7	807892	0.119516
OBJ38812_TMT10.txt	1	OBJ38812_TMT10.txt_1	127N	3BP5_MOUSE|Q9Z131	16.1166	KO_Early_1	KO_Early	NA	Model	NA	NA	Model	71050.7	785396	0.0904649
OBJ38812_TMT10.txt	1	OBJ38812_TMT10.txt_1	130N	3BP5_MOUSE|Q9Z131	15.9916	KO_Early_2	KO_Early	NA	Model	NA	NA	Model	65153.8	785396	0.0829567
OBJ38812_TMT10.txt	1	OBJ38812_TMT10.txt_1	128N	3BP5_MOUSE|Q9Z131	15.8318	KO_Late_1	KO_Late	NA	Model	NA	NA	Model	58323.1	785396	0.0742595
OBJ38812_TMT10.txt	1	OBJ38812_TMT10.txt_1	131N	3BP5_MOUSE|Q9Z131	15.9586	KO_Late_2	KO_Late	NA	Model	NA	NA	Model	63683	785396	0.081084
OBJ38812_TMT10.txt	1	OBJ38812_TMT10.txt_1	129N	3BP5_MOUSE|Q9Z131	16.1699	KO_Uninfect_1	KO_Uninfect	NA	Model	NA	NA	Model	73725.5	785396	0.0938706
OBJ38812_TMT10.txt	1	OBJ38812_TMT10.txt_1	131C	3BP5_MOUSE|Q9Z131	16.1687	KO_Uninfect_2	KO_Uninfect	NA	Model	NA	NA	Model	73663.8	785396	0.093792
OBJ38812_TMT10.txt	1	OBJ38812_TMT10.txt_1	126C	3BP5_MOUSE|Q9Z131	15.7363	WT_Early_1	WT_Early	NA	Model	NA	NA	Model	54587.7	785396	0.0695035
OBJ38812_TMT10.txt	1	OBJ38812_TMT10.txt_1	129C	3BP5_MOUSE|Q9Z131	15.9324	WT_Early_2	WT_Early	NA	Model	NA	NA	Model	62535.2	785396	0.0796226
OBJ38812_TMT10.txt	1	OBJ38812_TMT10.txt_1	127C	3BP5_MOUSE|Q9Z131	15.9081	WT_Late_1	WT_Late	NA	Model	NA	NA	Model	61492.1	785396	0.0782944
OBJ38812_TMT10.txt	1	OBJ38812_TMT10.txt_1	130C	3BP5_MOUSE|Q9Z131	15.8842	WT_Late_2	WT_Late	NA	Model	NA	NA	Model	60480.7	785396	0.0770067
OBJ38812_TMT10.txt	1	OBJ38812_TMT10.txt_1	128C	3BP5_MOUSE|Q9Z131	16.2193	WT_Uninfect_1	WT_Uninfect	NA	Model	NA	NA	Model	76295.6	785396	0.0971429
OBJ38812_TMT10_p2.txt	1	OBJ38812_TMT10_p2.txt_1	127N	3BP5L_MOUSE|Q99LH9	15.7989	KO_Early_3	KO_Early	NA	Model	NA	NA	Model	57007	731022	0.0779826
OBJ38812_TMT10_p2.txt	1	OBJ38812_TMT10_p2.txt_1	130N	3BP5L_MOUSE|Q99LH9	15.5325	KO_Early_4	KO_Early	NA	Model	NA	NA	Model	47397.4	731022	0.0648371
OBJ38812_TMT10_p2.txt	1	OBJ38812_TMT10_p2.txt_1	128N	3BP5L_MOUSE|Q99LH9	15.603	KO_Late_3	KO_Late	NA	Model	NA	NA	Model	49770	731022	0.0680827
OBJ38812_TMT10_p2.txt	1	OBJ38812_TMT10_p2.txt_1	131N	3BP5L_MOUSE|Q99LH9	15.8616	KO_Late_4	KO_Late	NA	Model	NA	NA	Model	59541.1	731022	0.0814492
OBJ38812_TMT10_p2.txt	1	OBJ38812_TMT10_p2.txt_1	129N	3BP5L_MOUSE|Q99LH9	15.9091	KO_Uninfect_3	KO_Uninfect	NA	Model	NA	NA	Model	61533.2	731022	0.0841742
OBJ38812_TMT10_p2.txt	1	OBJ38812_TMT10_p2.txt_1	126C	3BP5L_MOUSE|Q99LH9	16.1838	WT_Early_3	WT_Early	NA	Model	NA	NA	Model	74439.7	731022	0.10183
OBJ38812_TMT10_p2.txt	1	OBJ38812_TMT10_p2.txt_1	129C	3BP5L_MOUSE|Q99LH9	15.8703	WT_Early_4	WT_Early	NA	Model	NA	NA	Model	59900.7	731022	0.081941
OBJ38812_TMT10_p2.txt	1	OBJ38812_TMT10_p2.txt_1	127C	3BP5L_MOUSE|Q99LH9	16.3446	WT_Late_3	WT_Late	NA	Model	NA	NA	Model	83217.6	731022	0.113837
OBJ38812_TMT10_p2.txt	1	OBJ38812_TMT10_p2.txt_1	130C	3BP5L_MOUSE|Q99LH9	16.0308	WT_Late_4	WT_Late	NA	Model	NA	NA	Model	66950.7	731022	0.091585
OBJ38812_TMT10_p2.txt	1	OBJ38812_TMT10_p2.txt_1	128C	3BP5L_MOUSE|Q99LH9	15.6883	WT_Uninfect_3	WT_Uninfect	NA	Model	NA	NA	Model	52800.6	731022	0.0722284
OBJ38812_TMT10_p2.txt	1	OBJ38812_TMT10_p2.txt_1	131C	3BP5L_MOUSE|Q99LH9	15.8253	WT_Uninfect_4	WT_Uninfect	NA	Model	NA	NA	Model	58063.4	731022	0.0794277
OBJ38812_TMT10_p2.txt	1	OBJ38812_TMT10_p2.txt_1	127N	3HIDH_MOUSE|Q99L13	15.5322	KO_Early_3	KO_Early	NA	Model	NA	NA	Model	47385.6	561477	0.0843946
OBJ38812_TMT10_p2.txt	1	OBJ38812_TMT10_p2.txt_1	130N	3HIDH_MOUSE|Q99L13	15.4027	KO_Early_4	KO_Early	NA	Model	NA	NA	Model	43317.8	561477	0.0771498
OBJ38812_TMT10_p2.txt	1	OBJ38812_TMT10_p2.txt_1	128N	3HIDH_MOUSE|Q99L13	15.5462	KO_Late_3	KO_Late	NA	Model	NA	NA	Model	47848.5	561477	0.085219
OBJ38812_TMT10_p2.txt	1	OBJ38812_TMT10_p2.txt_1	131N	3HIDH_MOUSE|Q99L13	15.5436	KO_Late_4	KO_Late	NA	Model	NA	NA	Model	47764.4	561477	0.0850692
OBJ38812_TMT10_p2.txt	1	OBJ38812_TMT10_p2.txt_1	129N	3HIDH_MOUSE|Q99L13	15.5707	KO_Uninfect_3	KO_Uninfect	NA	Model	NA	NA	Model	48670	561477	0.0866821
OBJ38812_TMT10_p2.txt	1	OBJ38812_TMT10_p2.txt_1	126C	3HIDH_MOUSE|Q99L13	15.4492	WT_Early_3	WT_Early	NA	Model	NA	NA	Model	44738.6	561477	0.0796802
OBJ38812_TMT10_p2.txt	1	OBJ38812_TMT10_p2.txt_1	129C	3HIDH_MOUSE|Q99L13	15.5218	WT_Early_4	WT_Early	NA	Model	NA	NA	Model	47047.2	561477	0.0837919
OBJ38812_TMT10_p2.txt	1	OBJ38812_TMT10_p2.txt_1	127C	3HIDH_MOUSE|Q99L13	15.4924	WT_Late_3	WT_Late	NA	Model	NA	NA	Model	46096.1	561477	0.082098
OBJ38812_TMT10_p2.txt	1	OBJ38812_TMT10_p2.txt_1	130C	3HIDH_MOUSE|Q99L13	15.5259	WT_Late_4	WT_Late	NA	Model	NA	NA	Model	47181	561477	0.0840301
OBJ38812_TMT10_p2.txt	1	OBJ38812_TMT10_p2.txt_1	128C	3HIDH_MOUSE|Q99L13	15.3983	WT_Uninfect_3	WT_Uninfect	NA	Model	NA	NA	Model	43188.2	561477	0.076919
OBJ38812_TMT10_p2.txt	1	OBJ38812_TMT10_p2.txt_1	131C	3HIDH_MOUSE|Q99L13	15.6649	WT_Uninfect_4	WT_Uninfect	NA	Model	NA	NA	Model	51952.6	561477	0.0925286
OBJ38812_TMT10.txt	1	OBJ38812_TMT10.txt_1	127N	3HIDH_MOUSE|Q99L13	15.4796	KO_Early_1	KO_Early	NA	Model	NA	NA	Model	45690	557789	0.0819125
OBJ38812_TMT10.txt	1	OBJ38812_TMT10.txt_1	130N	3HIDH_MOUSE|Q99L13	15.5886	KO_Early_2	KO_Early	NA	Model	NA	NA	Model	49277.7	557789	0.0883446
OBJ38812_TMT10.txt	1	OBJ38812_TMT10.txt_1	128N	3HIDH_MOUSE|Q99L13	15.461	KO_Late_1	KO_Late	NA	Model	NA	NA	Model	45106.1	557789	0.0808658
OBJ38812_TMT10.txt	1	OBJ38812_TMT10.txt_1	131N	3HIDH_MOUSE|Q99L13	15.6106	KO_Late_2	KO_Late	NA	Model	NA	NA	Model	50032.1	557789	0.089697
OBJ38812_TMT10.txt	1	OBJ38812_TMT10.txt_1	129N	3HIDH_MOUSE|Q99L13	15.4853	KO_Uninfect_1	KO_Uninfect	NA	Model	NA	NA	Model	45872	557789	0.082239
OBJ38812_TMT10.txt	1	OBJ38812_TMT10.txt_1	131C	3HIDH_MOUSE|Q99L13	15.5583	KO_Uninfect_2	KO_Uninfect	NA	Model	NA	NA	Model	48252.4	557789	0.0865065
OBJ38812_TMT10.txt	1	OBJ38812_TMT10.txt_1	126C	3HIDH_MOUSE|Q99L13	15.523	WT_Early_1	WT_Early	NA	Model	NA	NA	Model	47087.1	557789	0.0844173
OBJ38812_TMT10.txt	1	OBJ38812_TMT10.txt_1	129C	3HIDH_MOUSE|Q99L13	15.4665	WT_Early_2	WT_Early	NA	Model	NA	NA	Model	45276.6	557789	0.0811714
OBJ38812_TMT10.txt	1	OBJ38812_TMT10.txt_1	127C	3HIDH_MOUSE|Q99L13	15.4907	WT_Late_1	WT_Late	NA	Model	NA	NA	Model	46043.1	557789	0.0825456
OBJ38812_TMT10.txt	1	OBJ38812_TMT10.txt_1	130C	3HIDH_MOUSE|Q99L13	15.4763	WT_Late_2	WT_Late	NA	Model	NA	NA	Model	45587.5	557789	0.0817288
OBJ38812_TMT10.txt	1	OBJ38812_TMT10.txt_1	128C	3HIDH_MOUSE|Q99L13	15.4014	WT_Uninfect_1	WT_Uninfect	NA	Model	NA	NA	Model	43278.4	557789	0.0775891
OBJ38812_TMT10_p2.txt	1	OBJ38812_TMT10_p2.txt_1	127N	3MG_MOUSE|Q04841	15.4232	KO_Early_3	KO_Early	NA	Model	NA	NA	Model	43937.9	545158	0.0805967
OBJ38812_TMT10_p2.txt	1	OBJ38812_TMT10_p2.txt_1	130N	3MG_MOUSE|Q04841	15.4869	KO_Early_4	KO_Early	NA	Model	NA	NA	Model	45921.6	545158	0.0842354
OBJ38812_TMT10_p2.txt	1	OBJ38812_TMT10_p2.txt_1	128N	3MG_MOUSE|Q04841	15.4239	KO_Late_3	KO_Late	NA	Model	NA	NA	Model	43959.7	545158	0.0806367
OBJ38812_TMT10_p2.txt	1	OBJ38812_TMT10_p2.txt_1	131N	3MG_MOUSE|Q04841	15.3576	KO_Late_4	KO_Late	NA	Model	NA	NA	Model	41986.6	545158	0.0770173
OBJ38812_TMT10_p2.txt	1	OBJ38812_TMT10_p2.txt_1	129N	3MG_MOUSE|Q04841	15.3355	KO_Uninfect_3	KO_Uninfect	NA	Model	NA	NA	Model	41346.9	545158	0.0758439
OBJ38812_TMT10_p2.txt	1	OBJ38812_TMT10_p2.txt_1	126C	3MG_MOUSE|Q04841	15.5707	WT_Early_3	WT_Early	NA	Model	NA	NA	Model	48667.2	545158	0.0892717
OBJ38812_TMT10_p2.txt	1	OBJ38812_TMT10_p2.txt_1	129C	3MG_MOUSE|Q04841	15.1765	WT_Early_4	WT_Early	NA	Model	NA	NA	Model	37031.9	545158	0.0679288
OBJ38812_TMT10_p2.txt	1	OBJ38812_TMT10_p2.txt_1	127C	3MG_MOUSE|Q04841	15.3127	WT_Late_3	WT_Late	NA	Model	NA	NA	Model	40699.7	545158	0.0746567
OBJ38812_TMT10_p2.txt	1	OBJ38812_TMT10_p2.txt_1	130C	3MG_MOUSE|Q04841	15.2424	WT_Late_4	WT_Late	NA	Model	NA	NA	Model	38762.4	545158	0.0711031
OBJ38812_TMT10_p2.txt	1	OBJ38812_TMT10_p2.txt_1	128C	3MG_MOUSE|Q04841	15.8224	WT_Uninfect_3	WT_Uninfect	NA	Model	NA	NA	Model	57946.7	545158	0.106293
OBJ38812_TMT10_p2.txt	1	OBJ38812_TMT10_p2.txt_1	131C	3MG_MOUSE|Q04841	15.9013	WT_Uninfect_4	WT_Uninfect	NA	Model	NA	NA	Model	61202.3	545158	0.112265
OBJ38812_TMT10_p2.txt	1	OBJ38812_TMT10_p2.txt_1	127N	41_MOUSE|P48193	16.112	KO_Early_3	KO_Early	NA	Model	NA	NA	Model	70824	1.11017e+06	0.0637958
OBJ38812_TMT10_p2.txt	1	OBJ38812_TMT10_p2.txt_1	130N	41_MOUSE|P48193	16.2598	KO_Early_4	KO_Early	NA	Model	NA	NA	Model	78465.4	1.11017e+06	0.0706789
OBJ38812_TMT10_p2.txt	1	OBJ38812_TMT10_p2.txt_1	128N	41_MOUSE|P48193	16.0821	KO_Late_3	KO_Late	NA	Model	NA	NA	Model	69372.7	1.11017e+06	0.0624886
OBJ38812_TMT10_p2.txt	1	OBJ38812_TMT10_p2.txt_1	131N	41_MOUSE|P48193	16.2089	KO_Late_4	KO_Late	NA	Model	NA	NA	Model	75748.4	1.11017e+06	0.0682315
OBJ38812_TMT10_p2.txt	1	OBJ38812_TMT10_p2.txt_1	129N	41_MOUSE|P48193	16.2021	KO_Uninfect_3	KO_Uninfect	NA	Model	NA	NA	Model	75392.6	1.11017e+06	0.0679111
OBJ38812_TMT10_p2.txt	1	OBJ38812_TMT10_p2.txt_1	126C	41_MOUSE|P48193	16.7197	WT_Early_3	WT_Early	NA	Model	NA	NA	Model	107931	1.11017e+06	0.0972201
OBJ38812_TMT10_p2.txt	1	OBJ38812_TMT10_p2.txt_1	129C	41_MOUSE|P48193	16.6797	WT_Early_4	WT_Early	NA	Model	NA	NA	Model	104973	1.11017e+06	0.0945563
OBJ38812_TMT10_p2.txt	1	OBJ38812_TMT10_p2.txt_1	127C	41_MOUSE|P48193	16.7214	WT_Late_3	WT_Late	NA	Model	NA	NA	Model	108054	1.11017e+06	0.0973313
OBJ38812_TMT10_p2.txt	1	OBJ38812_TMT10_p2.txt_1	130C	41_MOUSE|P48193	16.7048	WT_Late_4	WT_Late	NA	Model	NA	NA	Model	106822	1.11017e+06	0.0962212
OBJ38812_TMT10_p2.txt	1	OBJ38812_TMT10_p2.txt_1	128C	41_MOUSE|P48193	16.5845	WT_Uninfect_3	WT_Uninfect	NA	Model	NA	NA	Model	98271.3	1.11017e+06	0.0885194
OBJ38812_TMT10_p2.txt	1	OBJ38812_TMT10_p2.txt_1	131C	41_MOUSE|P48193	16.9451	WT_Uninfect_4	WT_Uninfect	NA	Model	NA	NA	Model	126174	1.11017e+06	0.113653
OBJ38812_TMT10.txt	1	OBJ38812_TMT10.txt_1	127N	41_MOUSE|P48193	16.2777	KO_Early_1	KO_Early	NA	Model	NA	NA	Model	79447.6	1.05762e+06	0.075119
OBJ38812_TMT10.txt	1	OBJ38812_TMT10.txt_1	130N	41_MOUSE|P48193	16.1574	KO_Early_2	KO_Early	NA	Model	NA	NA	Model	73090.1	1.05762e+06	0.0691078
OBJ38812_TMT10.txt	1	OBJ38812_TMT10.txt_1	128N	41_MOUSE|P48193	16.1922	KO_Late_1	KO_Late	NA	Model	NA	NA	Model	74875.4	1.05762e+06	0.0707958
OBJ38812_TMT10.txt	1	OBJ38812_TMT10.txt_1	131N	41_MOUSE|P48193	16.1658	KO_Late_2	KO_Late	NA	Model	NA	NA	Model	73517.4	1.05762e+06	0.0695119
OBJ38812_TMT10.txt	1	OBJ38812_TMT10.txt_1	129N	41_MOUSE|P48193	16.2203	KO_Uninfect_1	KO_Uninfect	NA	Model	NA	NA	Model	76349.9	1.05762e+06	0.07219
OBJ38812_TMT10.txt	1	OBJ38812_TMT10.txt_1	131C	41_MOUSE|P48193	16.219	KO_Uninfect_2	KO_Uninfect	NA	Model	NA	NA	Model	76279.5	1.05762e+06	0.0721235
OBJ38812_TMT10.txt	1	OBJ38812_TMT10.txt_1	126C	41_MOUSE|P48193	16.6314	WT_Early_1	WT_Early	NA	Model	NA	NA	Model	101518	1.05762e+06	0.0959872
OBJ38812_TMT10.txt	1	OBJ38812_TMT10.txt_1	129C	41_MOUSE|P48193	16.781	WT_Early_2	WT_Early	NA	Model	NA	NA	Model	112610	1.05762e+06	0.106475
OBJ38812_TMT10.txt	1	OBJ38812_TMT10.txt_1	127C	41_MOUSE|P48193	16.6059	WT_Late_1	WT_Late	NA	Model	NA	NA	Model	99741.4	1.05762e+06	0.094307
OBJ38812_TMT10.txt	1	OBJ38812_TMT10.txt_1	130C	41_MOUSE|P48193	16.7107	WT_Late_2	WT_Late	NA	Model	NA	NA	Model	107254	1.05762e+06	0.10141
OBJ38812_TMT10.txt	1	OBJ38812_TMT10.txt_1	128C	41_MOUSE|P48193	16.5326	WT_Uninfect_1	WT_Uninfect	NA	Model	NA	NA	Model	94800.5	1.05762e+06	0.0896354
OBJ38812_TMT10_p2.txt	1	OBJ38812_TMT10_p2.txt_1	127N	4EBP2_MOUSE|P70445	16.9675	KO_Early_3	KO_Early	NA	Model	NA	NA	Model	128156	1.49541e+06	0.0856996
OBJ38812_TMT10_p2.txt	1	OBJ38812_TMT10_p2.txt_1	130N	4EBP2_MOUSE|P70445	16.6167	KO_Early_4	KO_Early	NA	Model	NA	NA	Model	100492	1.49541e+06	0.0671999
OBJ38812_TMT10_p2.txt	1	OBJ38812_TMT10_p2.txt_1	128N	4EBP2_MOUSE|P70445	17.0644	KO_Late_3	KO_Late	NA	Model	NA	NA	Model	137057	1.49541e+06	0.0916516
OBJ38812_TMT10_p2.txt	1	OBJ38812_TMT10_p2.txt_1	131N	4EBP2_MOUSE|P70445	16.5828	KO_Late_4	KO_Late	NA	Model	NA	NA	Model	98154.9	1.49541e+06	0.0656374
OBJ38812_TMT10_p2.txt	1	OBJ38812_TMT10_p2.txt_1	129N	4EBP2_MOUSE|P70445	16.5988	KO_Uninfect_3	KO_Uninfect	NA	Model	NA	NA	Model	99250.6	1.49541e+06	0.0663701
OBJ38812_TMT10_p2.txt	1	OBJ38812_TMT10_p2.txt_1	126C	4EBP2_MOUSE|P70445	16.3576	WT_Early_3	WT_Early	NA	Model	NA	NA	Model	83971.6	1.49541e+06	0.0561528
OBJ38812_TMT10_p2.txt	1	OBJ38812_TMT10_p2.txt_1	129C	4EBP2_MOUSE|P70445	16.5881	WT_Early_4	WT_Early	NA	Model	NA	NA	Model	98519.3	1.49541e+06	0.065881
OBJ38812_TMT10_p2.txt	1	OBJ38812_TMT10_p2.txt_1	127C	4EBP2_MOUSE|P70445	16.2846	WT_Late_3	WT_Late	NA	Model	NA	NA	Model	79826.3	1.49541e+06	0.0533808
OBJ38812_TMT10_p2.txt	1	OBJ38812_TMT10_p2.txt_1	130C	4EBP2_MOUSE|P70445	16.9613	WT_Late_4	WT_Late	NA	Model	NA	NA	Model	127605	1.49541e+06	0.0853312
OBJ38812_TMT10_p2.txt	1	OBJ38812_TMT10_p2.txt_1	128C	4EBP2_MOUSE|P70445	17.0271	WT_Uninfect_3	WT_Uninfect	NA	Model	NA	NA	Model	133561	1.49541e+06	0.0893141
OBJ38812_TMT10_p2.txt	1	OBJ38812_TMT10_p2.txt_1	131C	4EBP2_MOUSE|P70445	18.2042	WT_Uninfect_4	WT_Uninfect	NA	Model	NA	NA	Model	301992	1.49541e+06	0.201946
OBJ38812_TMT10_p2.txt	1	OBJ38812_TMT10_p2.txt_1	127N	4ET_MOUSE|Q9EST3	16.3842	KO_Early_3	KO_Early	NA	Model	NA	NA	Model	85536.2	1.20934e+06	0.0707298
OBJ38812_TMT10_p2.txt	1	OBJ38812_TMT10_p2.txt_1	130N	4ET_MOUSE|Q9EST3	16.6191	KO_Early_4	KO_Early	NA	Model	NA	NA	Model	100659	1.20934e+06	0.0832348
OBJ38812_TMT10_p2.txt	1	OBJ38812_TMT10_p2.txt_1	128N	4ET_MOUSE|Q9EST3	16.4428	KO_Late_3	KO_Late	NA	Model	NA	NA	Model	89078.9	1.20934e+06	0.0736593
OBJ38812_TMT10_p2.txt	1	OBJ38812_TMT10_p2.txt_1	131N	4ET_MOUSE|Q9EST3	16.5365	KO_Late_4	KO_Late	NA	Model	NA	NA	Model	95053.6	1.20934e+06	0.0785997
OBJ38812_TMT10_p2.txt	1	OBJ38812_TMT10_p2.txt_1	129N	4ET_MOUSE|Q9EST3	16.5865	KO_Uninfect_3	KO_Uninfect	NA	Model	NA	NA	Model	98408.7	1.20934e+06	0.081374
OBJ38812_TMT10_p2.txt	1	OBJ38812_TMT10_p2.txt_1	126C	4ET_MOUSE|Q9EST3	16.7862	WT_Early_3	WT_Early	NA	Model	NA	NA	Model	113020	1.20934e+06	0.0934563
OBJ38812_TMT10_p2.txt	1	OBJ38812_TMT10_p2.txt_1	129C	4ET_MOUSE|Q9EST3	16.7676	WT_Early_4	WT_Early	NA	Model	NA	NA	Model	111572	1.20934e+06	0.0922584
OBJ38812_TMT10_p2.txt	1	OBJ38812_TMT10_p2.txt_1	127C	4ET_MOUSE|Q9EST3	16.6389	WT_Late_3	WT_Late	NA	Model	NA	NA	Model	102046	1.20934e+06	0.0843821
OBJ38812_TMT10_p2.txt	1	OBJ38812_TMT10_p2.txt_1	130C	4ET_MOUSE|Q9EST3	16.6862	WT_Late_4	WT_Late	NA	Model	NA	NA	Model	105452	1.20934e+06	0.0871984
OBJ38812_TMT10_p2.txt	1	OBJ38812_TMT10_p2.txt_1	128C	4ET_MOUSE|Q9EST3	16.3512	WT_Uninfect_3	WT_Uninfect	NA	Model	NA	NA	Model	83599.3	1.20934e+06	0.0691281
OBJ38812_TMT10_p2.txt	1	OBJ38812_TMT10_p2.txt_1	131C	4ET_MOUSE|Q9EST3	16.9539	WT_Uninfect_4	WT_Uninfect	NA	Model	NA	NA	Model	126950	1.20934e+06	0.104975
OBJ38812_TMT10.txt	1	OBJ38812_TMT10.txt_1	127N	4ET_MOUSE|Q9EST3	16.4765	KO_Early_1	KO_Early	NA	Model	NA	NA	Model	91184.3	1.17538e+06	0.0775788
OBJ38812_TMT10.txt	1	OBJ38812_TMT10.txt_1	130N	4ET_MOUSE|Q9EST3	16.4708	KO_Early_2	KO_Early	NA	Model	NA	NA	Model	90827.6	1.17538e+06	0.0772753
OBJ38812_TMT10.txt	1	OBJ38812_TMT10.txt_1	128N	4ET_MOUSE|Q9EST3	16.37	KO_Late_1	KO_Late	NA	Model	NA	NA	Model	84695.9	1.17538e+06	0.0720585
OBJ38812_TMT10.txt	1	OBJ38812_TMT10.txt_1	131N	4ET_MOUSE|Q9EST3	16.5035	KO_Late_2	KO_Late	NA	Model	NA	NA	Model	92908.7	1.17538e+06	0.0790458
OBJ38812_TMT10.txt	1	OBJ38812_TMT10.txt_1	129N	4ET_MOUSE|Q9EST3	16.6913	KO_Uninfect_1	KO_Uninfect	NA	Model	NA	NA	Model	105824	1.17538e+06	0.0900344
OBJ38812_TMT10.txt	1	OBJ38812_TMT10.txt_1	131C	4ET_MOUSE|Q9EST3	16.5251	KO_Uninfect_2	KO_Uninfect	NA	Model	NA	NA	Model	94309.6	1.17538e+06	0.0802378
OBJ38812_TMT10.txt	1	OBJ38812_TMT10.txt_1	126C	4ET_MOUSE|Q9EST3	16.8064	WT_Early_1	WT_Early	NA	Model	NA	NA	Model	114609	1.17538e+06	0.097508
OBJ38812_TMT10.txt	1	OBJ38812_TMT10.txt_1	129C	4ET_MOUSE|Q9EST3	16.663	WT_Early_2	WT_Early	NA	Model	NA	NA	Model	103765	1.17538e+06	0.0882824
OBJ38812_TMT10.txt	1	OBJ38812_TMT10.txt_1	127C	4ET_MOUSE|Q9EST3	16.5647	WT_Late_1	WT_Late	NA	Model	NA	NA	Model	96932.7	1.17538e+06	0.0824694
OBJ38812_TMT10.txt	1	OBJ38812_TMT10.txt_1	130C	4ET_MOUSE|Q9EST3	16.6172	WT_Late_2	WT_Late	NA	Model	NA	NA	Model	100522	1.17538e+06	0.0855234
OBJ38812_TMT10.txt	1	OBJ38812_TMT10.txt_1	128C	4ET_MOUSE|Q9EST3	16.6359	WT_Uninfect_1	WT_Uninfect	NA	Model	NA	NA	Model	101837	1.17538e+06	0.0866416
OBJ38812_TMT10_p2.txt	1	OBJ38812_TMT10_p2.txt_1	127N	4F2_MOUSE|P10852	17.0388	KO_Early_3	KO_Early	NA	Model	NA	NA	Model	134643	1.47042e+06	0.0915674
OBJ38812_TMT10_p2.txt	1	OBJ38812_TMT10_p2.txt_1	130N	4F2_MOUSE|P10852	16.9142	KO_Early_4	KO_Early	NA	Model	NA	NA	Model	123507	1.47042e+06	0.0839944
OBJ38812_TMT10_p2.txt	1	OBJ38812_TMT10_p2.txt_1	128N	4F2_MOUSE|P10852	17.1973	KO_Late_3	KO_Late	NA	Model	NA	NA	Model	150282	1.47042e+06	0.102203
OBJ38812_TMT10_p2.txt	1	OBJ38812_TMT10_p2.txt_1	131N	4F2_MOUSE|P10852	16.9689	KO_Late_4	KO_Late	NA	Model	NA	NA	Model	128274	1.47042e+06	0.0872363
OBJ38812_TMT10_p2.txt	1	OBJ38812_TMT10_p2.txt_1	129N	4F2_MOUSE|P10852	17.1975	KO_Uninfect_3	KO_Uninfect	NA	Model	NA	NA	Model	150297	1.47042e+06	0.102214
OBJ38812_TMT10_p2.txt	1	OBJ38812_TMT10_p2.txt_1	126C	4F2_MOUSE|P10852	16.79	WT_Early_3	WT_Early	NA	Model	NA	NA	Model	113320	1.47042e+06	0.0770662
OBJ38812_TMT10_p2.txt	1	OBJ38812_TMT10_p2.txt_1	129C	4F2_MOUSE|P10852	16.5847	WT_Early_4	WT_Early	NA	Model	NA	NA	Model	98288	1.47042e+06	0.0668434
OBJ38812_TMT10_p2.txt	1	OBJ38812_TMT10_p2.txt_1	127C	4F2_MOUSE|P10852	16.7733	WT_Late_3	WT_Late	NA	Model	NA	NA	Model	112010	1.47042e+06	0.0761752
OBJ38812_TMT10_p2.txt	1	OBJ38812_TMT10_p2.txt_1	130C	4F2_MOUSE|P10852	16.5451	WT_Late_4	WT_Late	NA	Model	NA	NA	Model	95626.7	1.47042e+06	0.0650335
OBJ38812_TMT10_p2.txt	1	OBJ38812_TMT10_p2.txt_1	128C	4F2_MOUSE|P10852	16.892	WT_Uninfect_3	WT_Uninfect	NA	Model	NA	NA	Model	121615	1.47042e+06	0.0827075
OBJ38812_TMT10_p2.txt	1	OBJ38812_TMT10_p2.txt_1	131C	4F2_MOUSE|P10852	16.8858	WT_Uninfect_4	WT_Uninfect	NA	Model	NA	NA	Model	121095	1.47042e+06	0.0823538
OBJ38812_TMT10.txt	1	OBJ38812_TMT10.txt_1	127N	4F2_MOUSE|P10852	17.163	KO_Early_1	KO_Early	NA	Model	NA	NA	Model	146748	1.5113e+06	0.0971005
OBJ38812_TMT10.txt	1	OBJ38812_TMT10.txt_1	130N	4F2_MOUSE|P10852	17.2001	KO_Early_2	KO_Early	NA	Model	NA	NA	Model	150571	1.5113e+06	0.0996302
OBJ38812_TMT10.txt	1	OBJ38812_TMT10.txt_1	128N	4F2_MOUSE|P10852	17.2074	KO_Late_1	KO_Late	NA	Model	NA	NA	Model	151339	1.5113e+06	0.100138
OBJ38812_TMT10.txt	1	OBJ38812_TMT10.txt_1	131N	4F2_MOUSE|P10852	17.2411	KO_Late_2	KO_Late	NA	Model	NA	NA	Model	154909	1.5113e+06	0.1025
OBJ38812_TMT10.txt	1	OBJ38812_TMT10.txt_1	129N	4F2_MOUSE|P10852	17.1607	KO_Uninfect_1	KO_Uninfect	NA	Model	NA	NA	Model	146516	1.5113e+06	0.0969467
OBJ38812_TMT10.txt	1	OBJ38812_TMT10.txt_1	131C	4F2_MOUSE|P10852	17.1559	KO_Uninfect_2	KO_Uninfect	NA	Model	NA	NA	Model	146034	1.5113e+06	0.0966281
OBJ38812_TMT10.txt	1	OBJ38812_TMT10.txt_1	126C	4F2_MOUSE|P10852	16.689	WT_Early_1	WT_Early	NA	Model	NA	NA	Model	105651	1.5113e+06	0.0699076
OBJ38812_TMT10.txt	1	OBJ38812_TMT10.txt_1	129C	4F2_MOUSE|P10852	16.4931	WT_Early_2	WT_Early	NA	Model	NA	NA	Model	92236.5	1.5113e+06	0.0610312
OBJ38812_TMT10.txt	1	OBJ38812_TMT10.txt_1	127C	4F2_MOUSE|P10852	16.7257	WT_Late_1	WT_Late	NA	Model	NA	NA	Model	108380	1.5113e+06	0.0717132
OBJ38812_TMT10.txt	1	OBJ38812_TMT10.txt_1	130C	4F2_MOUSE|P10852	16.3877	WT_Late_2	WT_Late	NA	Model	NA	NA	Model	85738.7	1.5113e+06	0.0567318
OBJ38812_TMT10.txt	1	OBJ38812_TMT10.txt_1	128C	4F2_MOUSE|P10852	16.6341	WT_Uninfect_1	WT_Uninfect	NA	Model	NA	NA	Model	101712	1.5113e+06	0.067301
OBJ38812_TMT10_p2.txt	1	OBJ38812_TMT10_p2.txt_1	127N	5NT3A_MOUSE|Q9D020	16.6931	KO_Early_3	KO_Early	NA	Model	NA	NA	Model	105956	1.04673e+06	0.101226
OBJ38812_TMT10_p2.txt	1	OBJ38812_TMT10_p2.txt_1	130N	5NT3A_MOUSE|Q9D020	16.6405	KO_Early_4	KO_Early	NA	Model	NA	NA	Model	102162	1.04673e+06	0.0976016
OBJ38812_TMT10_p2.txt	1	OBJ38812_TMT10_p2.txt_1	128N	5NT3A_MOUSE|Q9D020	16.8579	KO_Late_3	KO_Late	NA	Model	NA	NA	Model	118774	1.04673e+06	0.113471
OBJ38812_TMT10_p2.txt	1	OBJ38812_TMT10_p2.txt_1	131N	5NT3A_MOUSE|Q9D020	16.9789	KO_Late_4	KO_Late	NA	Model	NA	NA	Model	129166	1.04673e+06	0.1234
OBJ38812_TMT10_p2.txt	1	OBJ38812_TMT10_p2.txt_1	129N	5NT3A_MOUSE|Q9D020	16.8626	KO_Uninfect_3	KO_Uninfect	NA	Model	NA	NA	Model	119162	1.04673e+06	0.113842
OBJ38812_TMT10_p2.txt	1	OBJ38812_TMT10_p2.txt_1	126C	5NT3A_MOUSE|Q9D020	15.6587	WT_Early_3	WT_Early	NA	Model	NA	NA	Model	51730.2	1.04673e+06	0.0494209
OBJ38812_TMT10_p2.txt	1	OBJ38812_TMT10_p2.txt_1	129C	5NT3A_MOUSE|Q9D020	15.9046	WT_Early_4	WT_Early	NA	Model	NA	NA	Model	61344.5	1.04673e+06	0.058606
OBJ38812_TMT10_p2.txt	1	OBJ38812_TMT10_p2.txt_1	127C	5NT3A_MOUSE|Q9D020	15.9732	WT_Late_3	WT_Late	NA	Model	NA	NA	Model	64330.6	1.04673e+06	0.0614588
OBJ38812_TMT10_p2.txt	1	OBJ38812_TMT10_p2.txt_1	130C	5NT3A_MOUSE|Q9D020	16.4736	WT_Late_4	WT_Late	NA	Model	NA	NA	Model	91001.1	1.04673e+06	0.0869386
OBJ38812_TMT10_p2.txt	1	OBJ38812_TMT10_p2.txt_1	128C	5NT3A_MOUSE|Q9D020	15.8716	WT_Uninfect_3	WT_Uninfect	NA	Model	NA	NA	Model	59955	1.04673e+06	0.0572785
OBJ38812_TMT10_p2.txt	1	OBJ38812_TMT10_p2.txt_1	131C	5NT3A_MOUSE|Q9D020	15.8033	WT_Uninfect_4	WT_Uninfect	NA	Model	NA	NA	Model	57181.7	1.04673e+06	0.054629
OBJ38812_TMT10.txt	1	OBJ38812_TMT10.txt_1	127N	5NT3A_MOUSE|Q9D020	16.4001	KO_Early_1	KO_Early	NA	Model	NA	NA	Model	86483.1	1.08137e+06	0.0799752
OBJ38812_TMT10.txt	1	OBJ38812_TMT10.txt_1	130N	5NT3A_MOUSE|Q9D020	16.6986	KO_Early_2	KO_Early	NA	Model	NA	NA	Model	106363	1.08137e+06	0.0983595
OBJ38812_TMT10.txt	1	OBJ38812_TMT10.txt_1	128N	5NT3A_MOUSE|Q9D020	16.7843	KO_Late_1	KO_Late	NA	Model	NA	NA	Model	112869	1.08137e+06	0.104375
OBJ38812_TMT10.txt	1	OBJ38812_TMT10.txt_1	131N	5NT3A_MOUSE|Q9D020	16.9609	KO_Late_2	KO_Late	NA	Model	NA	NA	Model	127569	1.08137e+06	0.11797
OBJ38812_TMT10.txt	1	OBJ38812_TMT10.txt_1	129N	5NT3A_MOUSE|Q9D020	16.6396	KO_Uninfect_1	KO_Uninfect	NA	Model	NA	NA	Model	102100	1.08137e+06	0.0944172
OBJ38812_TMT10.txt	1	OBJ38812_TMT10.txt_1	131C	5NT3A_MOUSE|Q9D020	16.6706	KO_Uninfect_2	KO_Uninfect	NA	Model	NA	NA	Model	104317	1.08137e+06	0.0964673
OBJ38812_TMT10.txt	1	OBJ38812_TMT10.txt_1	126C	5NT3A_MOUSE|Q9D020	15.7141	WT_Early_1	WT_Early	NA	Model	NA	NA	Model	53754.7	1.08137e+06	0.0497097
OBJ38812_TMT10.txt	1	OBJ38812_TMT10.txt_1	129C	5NT3A_MOUSE|Q9D020	15.9635	WT_Early_2	WT_Early	NA	Model	NA	NA	Model	63900.4	1.08137e+06	0.0590918
OBJ38812_TMT10.txt	1	OBJ38812_TMT10.txt_1	127C	5NT3A_MOUSE|Q9D020	16.34	WT_Late_1	WT_Late	NA	Model	NA	NA	Model	82950.4	1.08137e+06	0.0767084
OBJ38812_TMT10.txt	1	OBJ38812_TMT10.txt_1	130C	5NT3A_MOUSE|Q9D020	16.5309	WT_Late_2	WT_Late	NA	Model	NA	NA	Model	94689.5	1.08137e+06	0.0875641
OBJ38812_TMT10.txt	1	OBJ38812_TMT10.txt_1	128C	5NT3A_MOUSE|Q9D020	15.8825	WT_Uninfect_1	WT_Uninfect	NA	Model	NA	NA	Model	60411.4	1.08137e+06	0.0558655
OBJ38812_TMT10_p2.txt	1	OBJ38812_TMT10_p2.txt_1	127N	5NT3B_MOUSE|Q3UFY7	15.7311	KO_Early_3	KO_Early	NA	Model	NA	NA	Model	54393.1	789625	0.0688848
OBJ38812_TMT10_p2.txt	1	OBJ38812_TMT10_p2.txt_1	130N	5NT3B_MOUSE|Q3UFY7	15.9495	KO_Early_4	KO_Early	NA	Model	NA	NA	Model	63283.5	789625	0.0801438
OBJ38812_TMT10_p2.txt	1	OBJ38812_TMT10_p2.txt_1	128N	5NT3B_MOUSE|Q3UFY7	15.855	KO_Late_3	KO_Late	NA	Model	NA	NA	Model	59269.7	789625	0.0750606
OBJ38812_TMT10_p2.txt	1	OBJ38812_TMT10_p2.txt_1	131N	5NT3B_MOUSE|Q3UFY7	15.926	KO_Late_4	KO_Late	NA	Model	NA	NA	Model	62259	789625	0.0788463
OBJ38812_TMT10_p2.txt	1	OBJ38812_TMT10_p2.txt_1	129N	5NT3B_MOUSE|Q3UFY7	16.0332	KO_Uninfect_3	KO_Uninfect	NA	Model	NA	NA	Model	67063.5	789625	0.0849308
OBJ38812_TMT10_p2.txt	1	OBJ38812_TMT10_p2.txt_1	126C	5NT3B_MOUSE|Q3UFY7	16.0578	WT_Early_3	WT_Early	NA	Model	NA	NA	Model	68214.4	789625	0.0863883
OBJ38812_TMT10_p2.txt	1	OBJ38812_TMT10_p2.txt_1	129C	5NT3B_MOUSE|Q3UFY7	16.1802	WT_Early_4	WT_Early	NA	Model	NA	NA	Model	74257.1	789625	0.094041
OBJ38812_TMT10_p2.txt	1	OBJ38812_TMT10_p2.txt_1	127C	5NT3B_MOUSE|Q3UFY7	16.0315	WT_Late_3	WT_Late	NA	Model	NA	NA	Model	66982.4	789625	0.0848282
OBJ38812_TMT10_p2.txt	1	OBJ38812_TMT10_p2.txt_1	130C	5NT3B_MOUSE|Q3UFY7	16.0869	WT_Late_4	WT_Late	NA	Model	NA	NA	Model	69603.4	789625	0.0881475
OBJ38812_TMT10_p2.txt	1	OBJ38812_TMT10_p2.txt_1	128C	5NT3B_MOUSE|Q3UFY7	15.8413	WT_Uninfect_3	WT_Uninfect	NA	Model	NA	NA	Model	58709.6	789625	0.0743513
OBJ38812_TMT10_p2.txt	1	OBJ38812_TMT10_p2.txt_1	131C	5NT3B_MOUSE|Q3UFY7	16.3134	WT_Uninfect_4	WT_Uninfect	NA	Model	NA	NA	Model	81434.5	789625	0.103131
OBJ38812_TMT10.txt	1	OBJ38812_TMT10.txt_1	127N	5NT3B_MOUSE|Q3UFY7	15.8085	KO_Early_1	KO_Early	NA	Model	NA	NA	Model	57390.4	767751	0.0747513
OBJ38812_TMT10.txt	1	OBJ38812_TMT10.txt_1	130N	5NT3B_MOUSE|Q3UFY7	15.9317	KO_Early_2	KO_Early	NA	Model	NA	NA	Model	62504.7	767751	0.0814127
OBJ38812_TMT10.txt	1	OBJ38812_TMT10.txt_1	128N	5NT3B_MOUSE|Q3UFY7	15.8918	KO_Late_1	KO_Late	NA	Model	NA	NA	Model	60802.7	767751	0.0791959
OBJ38812_TMT10.txt	1	OBJ38812_TMT10.txt_1	131N	5NT3B_MOUSE|Q3UFY7	15.7893	KO_Late_2	KO_Late	NA	Model	NA	NA	Model	56631.5	767751	0.0737629
OBJ38812_TMT10.txt	1	OBJ38812_TMT10.txt_1	129N	5NT3B_MOUSE|Q3UFY7	15.8263	KO_Uninfect_1	KO_Uninfect	NA	Model	NA	NA	Model	58100.2	767751	0.0756759
OBJ38812_TMT10.txt	1	OBJ38812_TMT10.txt_1	131C	5NT3B_MOUSE|Q3UFY7	15.8564	KO_Uninfect_2	KO_Uninfect	NA	Model	NA	NA	Model	59326.2	767751	0.0772727
OBJ38812_TMT10.txt	1	OBJ38812_TMT10.txt_1	126C	5NT3B_MOUSE|Q3UFY7	16.1343	WT_Early_1	WT_Early	NA	Model	NA	NA	Model	71929.8	767751	0.093689
OBJ38812_TMT10.txt	1	OBJ38812_TMT10.txt_1	129C	5NT3B_MOUSE|Q3UFY7	16.1233	WT_Early_2	WT_Early	NA	Model	NA	NA	Model	71382.8	767751	0.0929764
OBJ38812_TMT10.txt	1	OBJ38812_TMT10.txt_1	127C	5NT3B_MOUSE|Q3UFY7	15.9687	WT_Late_1	WT_Late	NA	Model	NA	NA	Model	64130.5	767751	0.0835303
OBJ38812_TMT10.txt	1	OBJ38812_TMT10.txt_1	130C	5NT3B_MOUSE|Q3UFY7	16.1224	WT_Late_2	WT_Late	NA	Model	NA	NA	Model	71336.4	767751	0.0929161
OBJ38812_TMT10.txt	1	OBJ38812_TMT10.txt_1	128C	5NT3B_MOUSE|Q3UFY7	16.0963	WT_Uninfect_1	WT_Uninfect	NA	Model	NA	NA	Model	70061.5	767751	0.0912554
OBJ38812_TMT10_p2.txt	1	OBJ38812_TMT10_p2.txt_1	127N	5NTC_MOUSE|Q3V1L4	16.4456	KO_Early_3	KO_Early	NA	Model	NA	NA	Model	89253.5	1.07576e+06	0.0829676
OBJ38812_TMT10_p2.txt	1	OBJ38812_TMT10_p2.txt_1	130N	5NTC_MOUSE|Q3V1L4	16.5241	KO_Early_4	KO_Early	NA	Model	NA	NA	Model	94242.3	1.07576e+06	0.087605
OBJ38812_TMT10_p2.txt	1	OBJ38812_TMT10_p2.txt_1	128N	5NTC_MOUSE|Q3V1L4	16.4139	KO_Late_3	KO_Late	NA	Model	NA	NA	Model	87314.4	1.07576e+06	0.0811651
OBJ38812_TMT10_p2.txt	1	OBJ38812_TMT10_p2.txt_1	131N	5NTC_MOUSE|Q3V1L4	16.4023	KO_Late_4	KO_Late	NA	Model	NA	NA	Model	86614.6	1.07576e+06	0.0805146
OBJ38812_TMT10_p2.txt	1	OBJ38812_TMT10_p2.txt_1	129N	5NTC_MOUSE|Q3V1L4	16.5074	KO_Uninfect_3	KO_Uninfect	NA	Model	NA	NA	Model	93155.5	1.07576e+06	0.0865948
OBJ38812_TMT10_p2.txt	1	OBJ38812_TMT10_p2.txt_1	126C	5NTC_MOUSE|Q3V1L4	16.438	WT_Early_3	WT_Early	NA	Model	NA	NA	Model	88783.3	1.07576e+06	0.0825305
OBJ38812_TMT10_p2.txt	1	OBJ38812_TMT10_p2.txt_1	129C	5NTC_MOUSE|Q3V1L4	16.4332	WT_Early_4	WT_Early	NA	Model	NA	NA	Model	88488.6	1.07576e+06	0.0822566
OBJ38812_TMT10_p2.txt	1	OBJ38812_TMT10_p2.txt_1	127C	5NTC_MOUSE|Q3V1L4	16.492	WT_Late_3	WT_Late	NA	Model	NA	NA	Model	92166.7	1.07576e+06	0.0856756
OBJ38812_TMT10_p2.txt	1	OBJ38812_TMT10_p2.txt_1	130C	5NTC_MOUSE|Q3V1L4	16.3713	WT_Late_4	WT_Late	NA	Model	NA	NA	Model	84770.6	1.07576e+06	0.0788004
OBJ38812_TMT10_p2.txt	1	OBJ38812_TMT10_p2.txt_1	128C	5NTC_MOUSE|Q3V1L4	16.472	WT_Uninfect_3	WT_Uninfect	NA	Model	NA	NA	Model	90897.3	1.07576e+06	0.0844956
OBJ38812_TMT10_p2.txt	1	OBJ38812_TMT10_p2.txt_1	131C	5NTC_MOUSE|Q3V1L4	16.4665	WT_Uninfect_4	WT_Uninfect	NA	Model	NA	NA	Model	90553.6	1.07576e+06	0.0841761
OBJ38812_TMT10.txt	1	OBJ38812_TMT10.txt_1	127N	5NTC_MOUSE|Q3V1L4	16.4801	KO_Early_1	KO_Early	NA	Model	NA	NA	Model	91410.9	1.07894e+06	0.0847232
OBJ38812_TMT10.txt	1	OBJ38812_TMT10.txt_1	130N	5NTC_MOUSE|Q3V1L4	16.5467	KO_Early_2	KO_Early	NA	Model	NA	NA	Model	95728.2	1.07894e+06	0.0887247
OBJ38812_TMT10.txt	1	OBJ38812_TMT10.txt_1	128N	5NTC_MOUSE|Q3V1L4	16.3228	KO_Late_1	KO_Late	NA	Model	NA	NA	Model	81967.6	1.07894e+06	0.0759708
OBJ38812_TMT10.txt	1	OBJ38812_TMT10.txt_1	131N	5NTC_MOUSE|Q3V1L4	16.506	KO_Late_2	KO_Late	NA	Model	NA	NA	Model	93070.5	1.07894e+06	0.0862614
OBJ38812_TMT10.txt	1	OBJ38812_TMT10.txt_1	129N	5NTC_MOUSE|Q3V1L4	16.3369	KO_Uninfect_1	KO_Uninfect	NA	Model	NA	NA	Model	82776.4	1.07894e+06	0.0767204
OBJ38812_TMT10.txt	1	OBJ38812_TMT10.txt_1	131C	5NTC_MOUSE|Q3V1L4	16.5042	KO_Uninfect_2	KO_Uninfect	NA	Model	NA	NA	Model	92950.8	1.07894e+06	0.0861504
OBJ38812_TMT10.txt	1	OBJ38812_TMT10.txt_1	126C	5NTC_MOUSE|Q3V1L4	16.4744	WT_Early_1	WT_Early	NA	Model	NA	NA	Model	91051.6	1.07894e+06	0.0843902
OBJ38812_TMT10.txt	1	OBJ38812_TMT10.txt_1	129C	5NTC_MOUSE|Q3V1L4	16.4205	WT_Early_2	WT_Early	NA	Model	NA	NA	Model	87713.1	1.07894e+06	0.081296
OBJ38812_TMT10.txt	1	OBJ38812_TMT10.txt_1	127C	5NTC_MOUSE|Q3V1L4	16.3959	WT_Late_1	WT_Late	NA	Model	NA	NA	Model	86232.4	1.07894e+06	0.0799236
OBJ38812_TMT10.txt	1	OBJ38812_TMT10.txt_1	130C	5NTC_MOUSE|Q3V1L4	16.5533	WT_Late_2	WT_Late	NA	Model	NA	NA	Model	96172	1.07894e+06	0.089136
OBJ38812_TMT10.txt	1	OBJ38812_TMT10.txt_1	128C	5NTC_MOUSE|Q3V1L4	16.4631	WT_Uninfect_1	WT_Uninfect	NA	Model	NA	NA	Model	90339.2	1.07894e+06	0.0837299
OBJ38812_TMT10_p2.txt	1	OBJ38812_TMT10_p2.txt_1	127N	68MP_MOUSE|P56379	17.224	KO_Early_3	KO_Early	NA	Model	NA	NA	Model	153087	1.74032e+06	0.0879646
OBJ38812_TMT10_p2.txt	1	OBJ38812_TMT10_p2.txt_1	130N	68MP_MOUSE|P56379	17.1079	KO_Early_4	KO_Early	NA	Model	NA	NA	Model	141252	1.74032e+06	0.0811645
OBJ38812_TMT10_p2.txt	1	OBJ38812_TMT10_p2.txt_1	128N	68MP_MOUSE|P56379	17.1967	KO_Late_3	KO_Late	NA	Model	NA	NA	Model	150219	1.74032e+06	0.0863164
OBJ38812_TMT10_p2.txt	1	OBJ38812_TMT10_p2.txt_1	131N	68MP_MOUSE|P56379	17.0775	KO_Late_4	KO_Late	NA	Model	NA	NA	Model	138303	1.74032e+06	0.0794698
OBJ38812_TMT10_p2.txt	1	OBJ38812_TMT10_p2.txt_1	129N	68MP_MOUSE|P56379	16.8049	KO_Uninfect_3	KO_Uninfect	NA	Model	NA	NA	Model	114491	1.74032e+06	0.0657871
OBJ38812_TMT10_p2.txt	1	OBJ38812_TMT10_p2.txt_1	126C	68MP_MOUSE|P56379	17.1083	WT_Early_3	WT_Early	NA	Model	NA	NA	Model	141288	1.74032e+06	0.0811848
OBJ38812_TMT10_p2.txt	1	OBJ38812_TMT10_p2.txt_1	129C	68MP_MOUSE|P56379	17.2495	WT_Early_4	WT_Early	NA	Model	NA	NA	Model	155813	1.74032e+06	0.0895312
OBJ38812_TMT10_p2.txt	1	OBJ38812_TMT10_p2.txt_1	127C	68MP_MOUSE|P56379	17.0822	WT_Late_3	WT_Late	NA	Model	NA	NA	Model	138760	1.74032e+06	0.0797325
OBJ38812_TMT10_p2.txt	1	OBJ38812_TMT10_p2.txt_1	130C	68MP_MOUSE|P56379	17.1449	WT_Late_4	WT_Late	NA	Model	NA	NA	Model	144917	1.74032e+06	0.08327
OBJ38812_TMT10_p2.txt	1	OBJ38812_TMT10_p2.txt_1	128C	68MP_MOUSE|P56379	17.3264	WT_Uninfect_3	WT_Uninfect	NA	Model	NA	NA	Model	164345	1.74032e+06	0.0944338
OBJ38812_TMT10_p2.txt	1	OBJ38812_TMT10_p2.txt_1	131C	68MP_MOUSE|P56379	17.2344	WT_Uninfect_4	WT_Uninfect	NA	Model	NA	NA	Model	154196	1.74032e+06	0.088602
OBJ38812_TMT10.txt	1	OBJ38812_TMT10.txt_1	127N	68MP_MOUSE|P56379	16.8636	KO_Early_1	KO_Early	NA	Model	NA	NA	Model	119248	1.71783e+06	0.0694177
OBJ38812_TMT10.txt	1	OBJ38812_TMT10.txt_1	130N	68MP_MOUSE|P56379	17.0936	KO_Early_2	KO_Early	NA	Model	NA	NA	Model	139856	1.71783e+06	0.0814141
OBJ38812_TMT10.txt	1	OBJ38812_TMT10.txt_1	128N	68MP_MOUSE|P56379	17.0873	KO_Late_1	KO_Late	NA	Model	NA	NA	Model	139253	1.71783e+06	0.0810631
OBJ38812_TMT10.txt	1	OBJ38812_TMT10.txt_1	131N	68MP_MOUSE|P56379	17.0703	KO_Late_2	KO_Late	NA	Model	NA	NA	Model	137619	1.71783e+06	0.0801117
OBJ38812_TMT10.txt	1	OBJ38812_TMT10.txt_1	129N	68MP_MOUSE|P56379	16.8847	KO_Uninfect_1	KO_Uninfect	NA	Model	NA	NA	Model	121002	1.71783e+06	0.0704387
OBJ38812_TMT10.txt	1	OBJ38812_TMT10.txt_1	131C	68MP_MOUSE|P56379	16.906	KO_Uninfect_2	KO_Uninfect	NA	Model	NA	NA	Model	122802	1.71783e+06	0.0714867
OBJ38812_TMT10.txt	1	OBJ38812_TMT10.txt_1	126C	68MP_MOUSE|P56379	17.4833	WT_Early_1	WT_Early	NA	Model	NA	NA	Model	183225	1.71783e+06	0.10666
OBJ38812_TMT10.txt	1	OBJ38812_TMT10.txt_1	129C	68MP_MOUSE|P56379	17.2959	WT_Early_2	WT_Early	NA	Model	NA	NA	Model	160915	1.71783e+06	0.0936732
OBJ38812_TMT10.txt	1	OBJ38812_TMT10.txt_1	127C	68MP_MOUSE|P56379	17.4627	WT_Late_1	WT_Late	NA	Model	NA	NA	Model	180634	1.71783e+06	0.105152
OBJ38812_TMT10.txt	1	OBJ38812_TMT10.txt_1	130C	68MP_MOUSE|P56379	17.067	WT_Late_2	WT_Late	NA	Model	NA	NA	Model	137302	1.71783e+06	0.0799276
OBJ38812_TMT10.txt	1	OBJ38812_TMT10.txt_1	128C	68MP_MOUSE|P56379	17.0137	WT_Uninfect_1	WT_Uninfect	NA	Model	NA	NA	Model	132327	1.71783e+06	0.0770313
OBJ38812_TMT10_p2.txt	1	OBJ38812_TMT10_p2.txt_1	127N	6PGD_MOUSE|Q9DCD0	18.2986	KO_Early_3	KO_Early	NA	Model	NA	NA	Model	322422	3.40821e+06	0.0946016
OBJ38812_TMT10_p2.txt	1	OBJ38812_TMT10_p2.txt_1	130N	6PGD_MOUSE|Q9DCD0	18.282	KO_Early_4	KO_Early	NA	Model	NA	NA	Model	318731	3.40821e+06	0.0935187
OBJ38812_TMT10_p2.txt	1	OBJ38812_TMT10_p2.txt_1	128N	6PGD_MOUSE|Q9DCD0	18.225	KO_Late_3	KO_Late	NA	Model	NA	NA	Model	306394	3.40821e+06	0.089899
OBJ38812_TMT10_p2.txt	1	OBJ38812_TMT10_p2.txt_1	131N	6PGD_MOUSE|Q9DCD0	18.2824	KO_Late_4	KO_Late	NA	Model	NA	NA	Model	318828	3.40821e+06	0.0935472
OBJ38812_TMT10_p2.txt	1	OBJ38812_TMT10_p2.txt_1	129N	6PGD_MOUSE|Q9DCD0	18.4714	KO_Uninfect_3	KO_Uninfect	NA	Model	NA	NA	Model	363449	3.40821e+06	0.106639
OBJ38812_TMT10_p2.txt	1	OBJ38812_TMT10_p2.txt_1	126C	6PGD_MOUSE|Q9DCD0	17.8347	WT_Early_3	WT_Early	NA	Model	NA	NA	Model	233757	3.40821e+06	0.0685866
OBJ38812_TMT10_p2.txt	1	OBJ38812_TMT10_p2.txt_1	129C	6PGD_MOUSE|Q9DCD0	17.9582	WT_Early_4	WT_Early	NA	Model	NA	NA	Model	254654	3.40821e+06	0.0747179
OBJ38812_TMT10_p2.txt	1	OBJ38812_TMT10_p2.txt_1	127C	6PGD_MOUSE|Q9DCD0	17.7913	WT_Late_3	WT_Late	NA	Model	NA	NA	Model	226834	3.40821e+06	0.0665554
OBJ38812_TMT10_p2.txt	1	OBJ38812_TMT10_p2.txt_1	130C	6PGD_MOUSE|Q9DCD0	17.889	WT_Late_4	WT_Late	NA	Model	NA	NA	Model	242724	3.40821e+06	0.0712176
OBJ38812_TMT10_p2.txt	1	OBJ38812_TMT10_p2.txt_1	128C	6PGD_MOUSE|Q9DCD0	18.0451	WT_Uninfect_3	WT_Uninfect	NA	Model	NA	NA	Model	270478	3.40821e+06	0.0793607
OBJ38812_TMT10_p2.txt	1	OBJ38812_TMT10_p2.txt_1	131C	6PGD_MOUSE|Q9DCD0	18.029	WT_Uninfect_4	WT_Uninfect	NA	Model	NA	NA	Model	267460	3.40821e+06	0.0784752
OBJ38812_TMT10.txt	1	OBJ38812_TMT10.txt_1	127N	6PGD_MOUSE|Q9DCD0	18.2857	KO_Early_1	KO_Early	NA	Model	NA	NA	Model	319561	3.4966e+06	0.0913921
OBJ38812_TMT10.txt	1	OBJ38812_TMT10.txt_1	130N	6PGD_MOUSE|Q9DCD0	18.4383	KO_Early_2	KO_Early	NA	Model	NA	NA	Model	355209	3.4966e+06	0.101587
OBJ38812_TMT10.txt	1	OBJ38812_TMT10.txt_1	128N	6PGD_MOUSE|Q9DCD0	18.2714	KO_Late_1	KO_Late	NA	Model	NA	NA	Model	316403	3.4966e+06	0.0904889
OBJ38812_TMT10.txt	1	OBJ38812_TMT10.txt_1	131N	6PGD_MOUSE|Q9DCD0	18.3445	KO_Late_2	KO_Late	NA	Model	NA	NA	Model	332845	3.4966e+06	0.0951911
OBJ38812_TMT10.txt	1	OBJ38812_TMT10.txt_1	129N	6PGD_MOUSE|Q9DCD0	18.3731	KO_Uninfect_1	KO_Uninfect	NA	Model	NA	NA	Model	339519	3.4966e+06	0.0970999
OBJ38812_TMT10.txt	1	OBJ38812_TMT10.txt_1	131C	6PGD_MOUSE|Q9DCD0	18.4035	KO_Uninfect_2	KO_Uninfect	NA	Model	NA	NA	Model	346734	3.4966e+06	0.0991634
OBJ38812_TMT10.txt	1	OBJ38812_TMT10.txt_1	126C	6PGD_MOUSE|Q9DCD0	17.9775	WT_Early_1	WT_Early	NA	Model	NA	NA	Model	258083	3.4966e+06	0.0738099
OBJ38812_TMT10.txt	1	OBJ38812_TMT10.txt_1	129C	6PGD_MOUSE|Q9DCD0	17.8271	WT_Early_2	WT_Early	NA	Model	NA	NA	Model	232544	3.4966e+06	0.0665058
OBJ38812_TMT10.txt	1	OBJ38812_TMT10.txt_1	127C	6PGD_MOUSE|Q9DCD0	17.8353	WT_Late_1	WT_Late	NA	Model	NA	NA	Model	233860	3.4966e+06	0.0668823
OBJ38812_TMT10.txt	1	OBJ38812_TMT10.txt_1	130C	6PGD_MOUSE|Q9DCD0	17.7062	WT_Late_2	WT_Late	NA	Model	NA	NA	Model	213846	3.4966e+06	0.0611583
OBJ38812_TMT10.txt	1	OBJ38812_TMT10.txt_1	128C	6PGD_MOUSE|Q9DCD0	18.0184	WT_Uninfect_1	WT_Uninfect	NA	Model	NA	NA	Model	265515	3.4966e+06	0.0759354
OBJ38812_TMT10_p2.txt	1	OBJ38812_TMT10_p2.txt_1	127N	6PGL_MOUSE|Q9CQ60	16.0653	KO_Early_3	KO_Early	NA	Model	NA	NA	Model	68568.4	857217	0.0799896
OBJ38812_TMT10_p2.txt	1	OBJ38812_TMT10_p2.txt_1	130N	6PGL_MOUSE|Q9CQ60	15.8821	KO_Early_4	KO_Early	NA	Model	NA	NA	Model	60393.7	857217	0.0704532
OBJ38812_TMT10_p2.txt	1	OBJ38812_TMT10_p2.txt_1	128N	6PGL_MOUSE|Q9CQ60	15.9678	KO_Late_3	KO_Late	NA	Model	NA	NA	Model	64089.6	857217	0.0747647
OBJ38812_TMT10_p2.txt	1	OBJ38812_TMT10_p2.txt_1	131N	6PGL_MOUSE|Q9CQ60	16.2263	KO_Late_4	KO_Late	NA	Model	NA	NA	Model	76668.3	857217	0.0894387
OBJ38812_TMT10_p2.txt	1	OBJ38812_TMT10_p2.txt_1	129N	6PGL_MOUSE|Q9CQ60	16.2298	KO_Uninfect_3	KO_Uninfect	NA	Model	NA	NA	Model	76852.7	857217	0.0896537
OBJ38812_TMT10_p2.txt	1	OBJ38812_TMT10_p2.txt_1	126C	6PGL_MOUSE|Q9CQ60	16.1855	WT_Early_3	WT_Early	NA	Model	NA	NA	Model	74528.7	857217	0.0869427
OBJ38812_TMT10_p2.txt	1	OBJ38812_TMT10_p2.txt_1	129C	6PGL_MOUSE|Q9CQ60	16.3693	WT_Early_4	WT_Early	NA	Model	NA	NA	Model	84657	857217	0.098758
OBJ38812_TMT10_p2.txt	1	OBJ38812_TMT10_p2.txt_1	127C	6PGL_MOUSE|Q9CQ60	16.2779	WT_Late_3	WT_Late	NA	Model	NA	NA	Model	79459	857217	0.0926941
OBJ38812_TMT10_p2.txt	1	OBJ38812_TMT10_p2.txt_1	130C	6PGL_MOUSE|Q9CQ60	16.2833	WT_Late_4	WT_Late	NA	Model	NA	NA	Model	79758.2	857217	0.0930433
OBJ38812_TMT10_p2.txt	1	OBJ38812_TMT10_p2.txt_1	128C	6PGL_MOUSE|Q9CQ60	15.9776	WT_Uninfect_3	WT_Uninfect	NA	Model	NA	NA	Model	64527.1	857217	0.0752752
OBJ38812_TMT10_p2.txt	1	OBJ38812_TMT10_p2.txt_1	131C	6PGL_MOUSE|Q9CQ60	15.7517	WT_Uninfect_4	WT_Uninfect	NA	Model	NA	NA	Model	55173.2	857217	0.0643631
OBJ38812_TMT10.txt	1	OBJ38812_TMT10.txt_1	127N	6PGL_MOUSE|Q9CQ60	16.098	KO_Early_1	KO_Early	NA	Model	NA	NA	Model	70143.8	869033	0.0807147
OBJ38812_TMT10.txt	1	OBJ38812_TMT10.txt_1	130N	6PGL_MOUSE|Q9CQ60	16.2234	KO_Early_2	KO_Early	NA	Model	NA	NA	Model	76514.3	869033	0.0880454
OBJ38812_TMT10.txt	1	OBJ38812_TMT10.txt_1	128N	6PGL_MOUSE|Q9CQ60	15.9741	KO_Late_1	KO_Late	NA	Model	NA	NA	Model	64367.8	869033	0.0740682
OBJ38812_TMT10.txt	1	OBJ38812_TMT10.txt_1	131N	6PGL_MOUSE|Q9CQ60	16.1253	KO_Late_2	KO_Late	NA	Model	NA	NA	Model	71481.4	869033	0.0822539
OBJ38812_TMT10.txt	1	OBJ38812_TMT10.txt_1	129N	6PGL_MOUSE|Q9CQ60	16.0833	KO_Uninfect_1	KO_Uninfect	NA	Model	NA	NA	Model	69433.2	869033	0.0798971
OBJ38812_TMT10.txt	1	OBJ38812_TMT10.txt_1	131C	6PGL_MOUSE|Q9CQ60	16.0953	KO_Uninfect_2	KO_Uninfect	NA	Model	NA	NA	Model	70010.1	869033	0.0805609
OBJ38812_TMT10.txt	1	OBJ38812_TMT10.txt_1	126C	6PGL_MOUSE|Q9CQ60	16.2593	WT_Early_1	WT_Early	NA	Model	NA	NA	Model	78438.2	869033	0.0902592
OBJ38812_TMT10.txt	1	OBJ38812_TMT10.txt_1	129C	6PGL_MOUSE|Q9CQ60	16.2237	WT_Early_2	WT_Early	NA	Model	NA	NA	Model	76529.1	869033	0.0880624
OBJ38812_TMT10.txt	1	OBJ38812_TMT10.txt_1	127C	6PGL_MOUSE|Q9CQ60	16.1627	WT_Late_1	WT_Late	NA	Model	NA	NA	Model	73357.6	869033	0.0844129
OBJ38812_TMT10.txt	1	OBJ38812_TMT10.txt_1	130C	6PGL_MOUSE|Q9CQ60	16.176	WT_Late_2	WT_Late	NA	Model	NA	NA	Model	74037.3	869033	0.085195
OBJ38812_TMT10.txt	1	OBJ38812_TMT10.txt_1	128C	6PGL_MOUSE|Q9CQ60	16.1393	WT_Uninfect_1	WT_Uninfect	NA	Model	NA	NA	Model	72179.7	869033	0.0830574
OBJ38812_TMT10_p2.txt	1	OBJ38812_TMT10_p2.txt_1	127N	A0A023I6U2_SHIFL|A0A023I6U2	15.0377	KO_Early_3	KO_Early	NA	Model	NA	NA	Model	33635.7	234528	0.143419
OBJ38812_TMT10_p2.txt	1	OBJ38812_TMT10_p2.txt_1	130N	A0A023I6U2_SHIFL|A0A023I6U2	13.1454	KO_Early_4	KO_Early	NA	Model	NA	NA	Model	9060.51	234528	0.038633
OBJ38812_TMT10_p2.txt	1	OBJ38812_TMT10_p2.txt_1	128N	A0A023I6U2_SHIFL|A0A023I6U2	15.9375	KO_Late_3	KO_Late	NA	Model	NA	NA	Model	62756.8	234528	0.267588
OBJ38812_TMT10_p2.txt	1	OBJ38812_TMT10_p2.txt_1	131N	A0A023I6U2_SHIFL|A0A023I6U2	14.9278	KO_Late_4	KO_Late	NA	Model	NA	NA	Model	31168.6	234528	0.132899
OBJ38812_TMT10_p2.txt	1	OBJ38812_TMT10_p2.txt_1	129N	A0A023I6U2_SHIFL|A0A023I6U2	9.83533	KO_Uninfect_3	KO_Uninfect	NA	Model	NA	NA	Model	913.545	234528	0.00389525
OBJ38812_TMT10_p2.txt	1	OBJ38812_TMT10_p2.txt_1	126C	A0A023I6U2_SHIFL|A0A023I6U2	14.1367	WT_Early_3	WT_Early	NA	Model	NA	NA	Model	18011.8	234528	0.0768002
OBJ38812_TMT10_p2.txt	1	OBJ38812_TMT10_p2.txt_1	129C	A0A023I6U2_SHIFL|A0A023I6U2	13.0405	WT_Early_4	WT_Early	NA	Model	NA	NA	Model	8425.34	234528	0.0359247
OBJ38812_TMT10_p2.txt	1	OBJ38812_TMT10_p2.txt_1	127C	A0A023I6U2_SHIFL|A0A023I6U2	15.1469	WT_Late_3	WT_Late	NA	Model	NA	NA	Model	36281.1	234528	0.154699
OBJ38812_TMT10_p2.txt	1	OBJ38812_TMT10_p2.txt_1	130C	A0A023I6U2_SHIFL|A0A023I6U2	14.1664	WT_Late_4	WT_Late	NA	Model	NA	NA	Model	18386.4	234528	0.0783976
OBJ38812_TMT10_p2.txt	1	OBJ38812_TMT10_p2.txt_1	128C	A0A023I6U2_SHIFL|A0A023I6U2	10.658	WT_Uninfect_3	WT_Uninfect	NA	Model	NA	NA	Model	1615.82	234528	0.00688967
OBJ38812_TMT10_p2.txt	1	OBJ38812_TMT10_p2.txt_1	131C	A0A023I6U2_SHIFL|A0A023I6U2	10.8358	WT_Uninfect_4	WT_Uninfect	NA	Model	NA	NA	Model	1827.65	234528	0.00779289
OBJ38812_TMT10.txt	1	OBJ38812_TMT10.txt_1	127N	A0A023I6U2_SHIFL|A0A023I6U2	13.8071	KO_Early_1	KO_Early	NA	Model	NA	NA	Model	14333.4	214351	0.0668688
OBJ38812_TMT10.txt	1	OBJ38812_TMT10.txt_1	130N	A0A023I6U2_SHIFL|A0A023I6U2	14.4879	KO_Early_2	KO_Early	NA	Model	NA	NA	Model	22977.3	214351	0.107195
OBJ38812_TMT10.txt	1	OBJ38812_TMT10.txt_1	128N	A0A023I6U2_SHIFL|A0A023I6U2	14.4575	KO_Late_1	KO_Late	NA	Model	NA	NA	Model	22498.4	214351	0.104961
OBJ38812_TMT10.txt	1	OBJ38812_TMT10.txt_1	131N	A0A023I6U2_SHIFL|A0A023I6U2	15.1966	KO_Late_2	KO_Late	NA	Model	NA	NA	Model	37550.7	214351	0.175183
OBJ38812_TMT10.txt	1	OBJ38812_TMT10.txt_1	129N	A0A023I6U2_SHIFL|A0A023I6U2	11.4252	KO_Uninfect_1	KO_Uninfect	NA	Model	NA	NA	Model	2750.02	214351	0.0128296
OBJ38812_TMT10.txt	1	OBJ38812_TMT10.txt_1	131C	A0A023I6U2_SHIFL|A0A023I6U2	11.4758	KO_Uninfect_2	KO_Uninfect	NA	Model	NA	NA	Model	2848.12	214351	0.0132872
OBJ38812_TMT10.txt	1	OBJ38812_TMT10.txt_1	126C	A0A023I6U2_SHIFL|A0A023I6U2	14.3522	WT_Early_1	WT_Early	NA	Model	NA	NA	Model	20914.8	214351	0.0975728
OBJ38812_TMT10.txt	1	OBJ38812_TMT10.txt_1	129C	A0A023I6U2_SHIFL|A0A023I6U2	13.143	WT_Early_2	WT_Early	NA	Model	NA	NA	Model	9045.87	214351	0.0422013
OBJ38812_TMT10.txt	1	OBJ38812_TMT10.txt_1	127C	A0A023I6U2_SHIFL|A0A023I6U2	15.2591	WT_Late_1	WT_Late	NA	Model	NA	NA	Model	39214.2	214351	0.182944
OBJ38812_TMT10.txt	1	OBJ38812_TMT10.txt_1	130C	A0A023I6U2_SHIFL|A0A023I6U2	14.8355	WT_Late_2	WT_Late	NA	Model	NA	NA	Model	29236.7	214351	0.136397
OBJ38812_TMT10.txt	1	OBJ38812_TMT10.txt_1	128C	A0A023I6U2_SHIFL|A0A023I6U2	9.06802	WT_Uninfect_1	WT_Uninfect	NA	Model	NA	NA	Model	536.717	214351	0.00250392
OBJ38812_TMT10_p2.txt	1	OBJ38812_TMT10_p2.txt_1	127N	A0A087WP63_MOUSE|A0A087WP63	15.5441	KO_Early_3	KO_Early	NA	Model	NA	NA	Model	47780.6	530674	0.0900376
OBJ38812_TMT10_p2.txt	1	OBJ38812_TMT10_p2.txt_1	130N	A0A087WP63_MOUSE|A0A087WP63	15.4419	KO_Early_4	KO_Early	NA	Model	NA	NA	Model	44511.1	530674	0.0838766
OBJ38812_TMT10_p2.txt	1	OBJ38812_TMT10_p2.txt_1	128N	A0A087WP63_MOUSE|A0A087WP63	15.5593	KO_Late_3	KO_Late	NA	Model	NA	NA	Model	48285.2	530674	0.0909884
OBJ38812_TMT10_p2.txt	1	OBJ38812_TMT10_p2.txt_1	131N	A0A087WP63_MOUSE|A0A087WP63	15.4517	KO_Late_4	KO_Late	NA	Model	NA	NA	Model	44813.9	530674	0.0844471
OBJ38812_TMT10_p2.txt	1	OBJ38812_TMT10_p2.txt_1	129N	A0A087WP63_MOUSE|A0A087WP63	15.3701	KO_Uninfect_3	KO_Uninfect	NA	Model	NA	NA	Model	42349.8	530674	0.0798037
OBJ38812_TMT10_p2.txt	1	OBJ38812_TMT10_p2.txt_1	126C	A0A087WP63_MOUSE|A0A087WP63	15.4115	WT_Early_3	WT_Early	NA	Model	NA	NA	Model	43582.3	530674	0.0821263
OBJ38812_TMT10_p2.txt	1	OBJ38812_TMT10_p2.txt_1	129C	A0A087WP63_MOUSE|A0A087WP63	15.1131	WT_Early_4	WT_Early	NA	Model	NA	NA	Model	35440.9	530674	0.0667847
OBJ38812_TMT10_p2.txt	1	OBJ38812_TMT10_p2.txt_1	127C	A0A087WP63_MOUSE|A0A087WP63	15.3261	WT_Late_3	WT_Late	NA	Model	NA	NA	Model	41079.7	530674	0.0774104
OBJ38812_TMT10_p2.txt	1	OBJ38812_TMT10_p2.txt_1	130C	A0A087WP63_MOUSE|A0A087WP63	15.2329	WT_Late_4	WT_Late	NA	Model	NA	NA	Model	38509.3	530674	0.0725668
OBJ38812_TMT10_p2.txt	1	OBJ38812_TMT10_p2.txt_1	128C	A0A087WP63_MOUSE|A0A087WP63	15.7436	WT_Uninfect_3	WT_Uninfect	NA	Model	NA	NA	Model	54865.5	530674	0.103388
OBJ38812_TMT10_p2.txt	1	OBJ38812_TMT10_p2.txt_1	131C	A0A087WP63_MOUSE|A0A087WP63	15.4778	WT_Uninfect_4	WT_Uninfect	NA	Model	NA	NA	Model	45631.9	530674	0.0859885
OBJ38812_TMT10.txt	1	OBJ38812_TMT10.txt_1	127N	A0A087WP63_MOUSE|A0A087WP63	15.4088	KO_Early_1	KO_Early	NA	Model	NA	NA	Model	43500.9	524321	0.0829661
OBJ38812_TMT10.txt	1	OBJ38812_TMT10.txt_1	130N	A0A087WP63_MOUSE|A0A087WP63	15.3876	KO_Early_2	KO_Early	NA	Model	NA	NA	Model	42866.7	524321	0.0817566
OBJ38812_TMT10.txt	1	OBJ38812_TMT10.txt_1	128N	A0A087WP63_MOUSE|A0A087WP63	15.4816	KO_Late_1	KO_Late	NA	Model	NA	NA	Model	45753.4	524321	0.0872622
OBJ38812_TMT10.txt	1	OBJ38812_TMT10.txt_1	131N	A0A087WP63_MOUSE|A0A087WP63	15.3607	KO_Late_2	KO_Late	NA	Model	NA	NA	Model	42075.2	524321	0.080247
OBJ38812_TMT10.txt	1	OBJ38812_TMT10.txt_1	129N	A0A087WP63_MOUSE|A0A087WP63	15.3141	KO_Uninfect_1	KO_Uninfect	NA	Model	NA	NA	Model	40737.5	524321	0.0776956
OBJ38812_TMT10.txt	1	OBJ38812_TMT10.txt_1	131C	A0A087WP63_MOUSE|A0A087WP63	15.348	KO_Uninfect_2	KO_Uninfect	NA	Model	NA	NA	Model	41705.8	524321	0.0795425
OBJ38812_TMT10.txt	1	OBJ38812_TMT10.txt_1	126C	A0A087WP63_MOUSE|A0A087WP63	15.3915	WT_Early_1	WT_Early	NA	Model	NA	NA	Model	42983.5	524321	0.0819794
OBJ38812_TMT10.txt	1	OBJ38812_TMT10.txt_1	129C	A0A087WP63_MOUSE|A0A087WP63	15.3917	WT_Early_2	WT_Early	NA	Model	NA	NA	Model	42989.6	524321	0.0819909
OBJ38812_TMT10.txt	1	OBJ38812_TMT10.txt_1	127C	A0A087WP63_MOUSE|A0A087WP63	15.5925	WT_Late_1	WT_Late	NA	Model	NA	NA	Model	49408.3	524321	0.0942328
OBJ38812_TMT10.txt	1	OBJ38812_TMT10.txt_1	130C	A0A087WP63_MOUSE|A0A087WP63	15.4235	WT_Late_2	WT_Late	NA	Model	NA	NA	Model	43946.9	524321	0.0838167
OBJ38812_TMT10.txt	1	OBJ38812_TMT10.txt_1	128C	A0A087WP63_MOUSE|A0A087WP63	15.4425	WT_Uninfect_1	WT_Uninfect	NA	Model	NA	NA	Model	44529.7	524321	0.0849283
OBJ38812_TMT10_p2.txt	1	OBJ38812_TMT10_p2.txt_1	127N	A0A087WP73_MOUSE|A0A087WP73	14.6835	KO_Early_3	KO_Early	NA	Model	NA	NA	Model	26312.5	338377	0.077761
OBJ38812_TMT10_p2.txt	1	OBJ38812_TMT10_p2.txt_1	130N	A0A087WP73_MOUSE|A0A087WP73	14.5779	KO_Early_4	KO_Early	NA	Model	NA	NA	Model	24455.6	338377	0.0722732
OBJ38812_TMT10_p2.txt	1	OBJ38812_TMT10_p2.txt_1	128N	A0A087WP73_MOUSE|A0A087WP73	14.1526	KO_Late_3	KO_Late	NA	Model	NA	NA	Model	18212.4	338377	0.0538227
OBJ38812_TMT10_p2.txt	1	OBJ38812_TMT10_p2.txt_1	131N	A0A087WP73_MOUSE|A0A087WP73	14.4793	KO_Late_4	KO_Late	NA	Model	NA	NA	Model	22840.4	338377	0.0675
OBJ38812_TMT10_p2.txt	1	OBJ38812_TMT10_p2.txt_1	129N	A0A087WP73_MOUSE|A0A087WP73	14.573	KO_Uninfect_3	KO_Uninfect	NA	Model	NA	NA	Model	24373.4	338377	0.0720302
OBJ38812_TMT10_p2.txt	1	OBJ38812_TMT10_p2.txt_1	126C	A0A087WP73_MOUSE|A0A087WP73	14.7281	WT_Early_3	WT_Early	NA	Model	NA	NA	Model	27139.7	338377	0.0802055
OBJ38812_TMT10_p2.txt	1	OBJ38812_TMT10_p2.txt_1	129C	A0A087WP73_MOUSE|A0A087WP73	14.9659	WT_Early_4	WT_Early	NA	Model	NA	NA	Model	32002.3	338377	0.0945758
OBJ38812_TMT10_p2.txt	1	OBJ38812_TMT10_p2.txt_1	127C	A0A087WP73_MOUSE|A0A087WP73	14.8905	WT_Late_3	WT_Late	NA	Model	NA	NA	Model	30372.1	338377	0.089758
OBJ38812_TMT10_p2.txt	1	OBJ38812_TMT10_p2.txt_1	130C	A0A087WP73_MOUSE|A0A087WP73	15.0978	WT_Late_4	WT_Late	NA	Model	NA	NA	Model	35067	338377	0.103633
OBJ38812_TMT10_p2.txt	1	OBJ38812_TMT10_p2.txt_1	128C	A0A087WP73_MOUSE|A0A087WP73	14.9146	WT_Uninfect_3	WT_Uninfect	NA	Model	NA	NA	Model	30885.5	338377	0.0912755
OBJ38812_TMT10_p2.txt	1	OBJ38812_TMT10_p2.txt_1	131C	A0A087WP73_MOUSE|A0A087WP73	15.2871	WT_Uninfect_4	WT_Uninfect	NA	Model	NA	NA	Model	39983.4	338377	0.118162
OBJ38812_TMT10_p2.txt	1	OBJ38812_TMT10_p2.txt_1	127N	A0A087WPL5_MOUSE|A0A087WPL5	15.2585	KO_Early_3	KO_Early	NA	Model	NA	NA	Model	39199.1	485714	0.0807041
OBJ38812_TMT10_p2.txt	1	OBJ38812_TMT10_p2.txt_1	130N	A0A087WPL5_MOUSE|A0A087WPL5	15.1999	KO_Early_4	KO_Early	NA	Model	NA	NA	Model	37638.6	485714	0.0774913
OBJ38812_TMT10_p2.txt	1	OBJ38812_TMT10_p2.txt_1	128N	A0A087WPL5_MOUSE|A0A087WPL5	14.9683	KO_Late_3	KO_Late	NA	Model	NA	NA	Model	32055.2	485714	0.0659961
OBJ38812_TMT10_p2.txt	1	OBJ38812_TMT10_p2.txt_1	131N	A0A087WPL5_MOUSE|A0A087WPL5	15.5838	KO_Late_4	KO_Late	NA	Model	NA	NA	Model	49113.3	485714	0.101116
OBJ38812_TMT10_p2.txt	1	OBJ38812_TMT10_p2.txt_1	129N	A0A087WPL5_MOUSE|A0A087WPL5	15.216	KO_Uninfect_3	KO_Uninfect	NA	Model	NA	NA	Model	38060.7	485714	0.0783604
OBJ38812_TMT10_p2.txt	1	OBJ38812_TMT10_p2.txt_1	126C	A0A087WPL5_MOUSE|A0A087WPL5	14.9927	WT_Early_3	WT_Early	NA	Model	NA	NA	Model	32603.3	485714	0.0671245
OBJ38812_TMT10_p2.txt	1	OBJ38812_TMT10_p2.txt_1	129C	A0A087WPL5_MOUSE|A0A087WPL5	14.9921	WT_Early_4	WT_Early	NA	Model	NA	NA	Model	32589.8	485714	0.0670967
OBJ38812_TMT10_p2.txt	1	OBJ38812_TMT10_p2.txt_1	127C	A0A087WPL5_MOUSE|A0A087WPL5	15.1792	WT_Late_3	WT_Late	NA	Model	NA	NA	Model	37101.5	485714	0.0763855
OBJ38812_TMT10_p2.txt	1	OBJ38812_TMT10_p2.txt_1	130C	A0A087WPL5_MOUSE|A0A087WPL5	15.0736	WT_Late_4	WT_Late	NA	Model	NA	NA	Model	34484.2	485714	0.070997
OBJ38812_TMT10_p2.txt	1	OBJ38812_TMT10_p2.txt_1	128C	A0A087WPL5_MOUSE|A0A087WPL5	15.8402	WT_Uninfect_3	WT_Uninfect	NA	Model	NA	NA	Model	58665.5	485714	0.120782
OBJ38812_TMT10_p2.txt	1	OBJ38812_TMT10_p2.txt_1	131C	A0A087WPL5_MOUSE|A0A087WPL5	15.7669	WT_Uninfect_4	WT_Uninfect	NA	Model	NA	NA	Model	55759	485714	0.114798
OBJ38812_TMT10.txt	1	OBJ38812_TMT10.txt_1	127N	A0A087WPL5_MOUSE|A0A087WPL5	14.977	KO_Early_1	KO_Early	NA	Model	NA	NA	Model	32249.6	460338	0.0700564
OBJ38812_TMT10.txt	1	OBJ38812_TMT10.txt_1	130N	A0A087WPL5_MOUSE|A0A087WPL5	14.6959	KO_Early_2	KO_Early	NA	Model	NA	NA	Model	26539.7	460338	0.0576528
OBJ38812_TMT10.txt	1	OBJ38812_TMT10.txt_1	128N	A0A087WPL5_MOUSE|A0A087WPL5	15.4014	KO_Late_1	KO_Late	NA	Model	NA	NA	Model	43280.9	460338	0.09402
OBJ38812_TMT10.txt	1	OBJ38812_TMT10.txt_1	131N	A0A087WPL5_MOUSE|A0A087WPL5	15.1907	KO_Late_2	KO_Late	NA	Model	NA	NA	Model	37398.5	460338	0.0812415
OBJ38812_TMT10.txt	1	OBJ38812_TMT10.txt_1	129N	A0A087WPL5_MOUSE|A0A087WPL5	15.2134	KO_Uninfect_1	KO_Uninfect	NA	Model	NA	NA	Model	37992.2	460338	0.0825311
OBJ38812_TMT10.txt	1	OBJ38812_TMT10.txt_1	131C	A0A087WPL5_MOUSE|A0A087WPL5	14.9361	KO_Uninfect_2	KO_Uninfect	NA	Model	NA	NA	Model	31348.7	460338	0.0680994
OBJ38812_TMT10.txt	1	OBJ38812_TMT10.txt_1	126C	A0A087WPL5_MOUSE|A0A087WPL5	15.5969	WT_Early_1	WT_Early	NA	Model	NA	NA	Model	49559.1	460338	0.107658
OBJ38812_TMT10.txt	1	OBJ38812_TMT10.txt_1	129C	A0A087WPL5_MOUSE|A0A087WPL5	15.0456	WT_Early_2	WT_Early	NA	Model	NA	NA	Model	33820.2	460338	0.0734682
OBJ38812_TMT10.txt	1	OBJ38812_TMT10.txt_1	127C	A0A087WPL5_MOUSE|A0A087WPL5	15.4427	WT_Late_1	WT_Late	NA	Model	NA	NA	Model	44537.2	460338	0.0967491
OBJ38812_TMT10.txt	1	OBJ38812_TMT10.txt_1	130C	A0A087WPL5_MOUSE|A0A087WPL5	15.5184	WT_Late_2	WT_Late	NA	Model	NA	NA	Model	46935.6	460338	0.101959
OBJ38812_TMT10.txt	1	OBJ38812_TMT10.txt_1	128C	A0A087WPL5_MOUSE|A0A087WPL5	15.2225	WT_Uninfect_1	WT_Uninfect	NA	Model	NA	NA	Model	38232.3	460338	0.0830528
OBJ38812_TMT10_p2.txt	1	OBJ38812_TMT10_p2.txt_1	127N	A0A087WPT0_MOUSE|A0A087WPT0	13.9205	KO_Early_3	KO_Early	NA	Model	NA	NA	Model	15505.7	156297	0.0992066
OBJ38812_TMT10_p2.txt	1	OBJ38812_TMT10_p2.txt_1	130N	A0A087WPT0_MOUSE|A0A087WPT0	13.5994	KO_Early_4	KO_Early	NA	Model	NA	NA	Model	12411.3	156297	0.0794083
OBJ38812_TMT10_p2.txt	1	OBJ38812_TMT10_p2.txt_1	128N	A0A087WPT0_MOUSE|A0A087WPT0	14.1089	KO_Late_3	KO_Late	NA	Model	NA	NA	Model	17668.9	156297	0.113047
OBJ38812_TMT10_p2.txt	1	OBJ38812_TMT10_p2.txt_1	131N	A0A087WPT0_MOUSE|A0A087WPT0	14.0697	KO_Late_4	KO_Late	NA	Model	NA	NA	Model	17195	156297	0.110015
OBJ38812_TMT10_p2.txt	1	OBJ38812_TMT10_p2.txt_1	129N	A0A087WPT0_MOUSE|A0A087WPT0	13.7677	KO_Uninfect_3	KO_Uninfect	NA	Model	NA	NA	Model	13946.9	156297	0.0892336
OBJ38812_TMT10_p2.txt	1	OBJ38812_TMT10_p2.txt_1	126C	A0A087WPT0_MOUSE|A0A087WPT0	13.5717	WT_Early_3	WT_Early	NA	Model	NA	NA	Model	12175.6	156297	0.0779006
OBJ38812_TMT10_p2.txt	1	OBJ38812_TMT10_p2.txt_1	129C	A0A087WPT0_MOUSE|A0A087WPT0	13.2619	WT_Early_4	WT_Early	NA	Model	NA	NA	Model	9822.4	156297	0.0628445
OBJ38812_TMT10_p2.txt	1	OBJ38812_TMT10_p2.txt_1	127C	A0A087WPT0_MOUSE|A0A087WPT0	14.0172	WT_Late_3	WT_Late	NA	Model	NA	NA	Model	16580	156297	0.10608
OBJ38812_TMT10_p2.txt	1	OBJ38812_TMT10_p2.txt_1	130C	A0A087WPT0_MOUSE|A0A087WPT0	13.6188	WT_Late_4	WT_Late	NA	Model	NA	NA	Model	12579.3	156297	0.0804832
OBJ38812_TMT10_p2.txt	1	OBJ38812_TMT10_p2.txt_1	128C	A0A087WPT0_MOUSE|A0A087WPT0	12.2214	WT_Uninfect_3	WT_Uninfect	NA	Model	NA	NA	Model	4775.36	156297	0.0305531
OBJ38812_TMT10_p2.txt	1	OBJ38812_TMT10_p2.txt_1	131C	A0A087WPT0_MOUSE|A0A087WPT0	13.4362	WT_Uninfect_4	WT_Uninfect	NA	Model	NA	NA	Model	11083.7	156297	0.0709144
OBJ38812_TMT10_p2.txt	1	OBJ38812_TMT10_p2.txt_1	127N	A0A087WQM0_MOUSE|A0A087WQM0	14.4876	KO_Early_3	KO_Early	NA	Model	NA	NA	Model	22971.9	242410	0.0947647
OBJ38812_TMT10_p2.txt	1	OBJ38812_TMT10_p2.txt_1	130N	A0A087WQM0_MOUSE|A0A087WQM0	14.3188	KO_Early_4	KO_Early	NA	Model	NA	NA	Model	20436.1	242410	0.0843037
OBJ38812_TMT10_p2.txt	1	OBJ38812_TMT10_p2.txt_1	128N	A0A087WQM0_MOUSE|A0A087WQM0	14.4161	KO_Late_3	KO_Late	NA	Model	NA	NA	Model	21861.8	242410	0.0901854
OBJ38812_TMT10_p2.txt	1	OBJ38812_TMT10_p2.txt_1	131N	A0A087WQM0_MOUSE|A0A087WQM0	14.4829	KO_Late_4	KO_Late	NA	Model	NA	NA	Model	22897.1	242410	0.0944559
OBJ38812_TMT10_p2.txt	1	OBJ38812_TMT10_p2.txt_1	129N	A0A087WQM0_MOUSE|A0A087WQM0	14.3897	KO_Uninfect_3	KO_Uninfect	NA	Model	NA	NA	Model	21465.4	242410	0.0885499
OBJ38812_TMT10_p2.txt	1	OBJ38812_TMT10_p2.txt_1	126C	A0A087WQM0_MOUSE|A0A087WQM0	13.9464	WT_Early_3	WT_Early	NA	Model	NA	NA	Model	15786.5	242410	0.065123
OBJ38812_TMT10_p2.txt	1	OBJ38812_TMT10_p2.txt_1	129C	A0A087WQM0_MOUSE|A0A087WQM0	14.1803	WT_Early_4	WT_Early	NA	Model	NA	NA	Model	18565.5	242410	0.076587
OBJ38812_TMT10_p2.txt	1	OBJ38812_TMT10_p2.txt_1	127C	A0A087WQM0_MOUSE|A0A087WQM0	14.048	WT_Late_3	WT_Late	NA	Model	NA	NA	Model	16937.9	242410	0.069873
OBJ38812_TMT10_p2.txt	1	OBJ38812_TMT10_p2.txt_1	130C	A0A087WQM0_MOUSE|A0A087WQM0	14.2408	WT_Late_4	WT_Late	NA	Model	NA	NA	Model	19360.4	242410	0.0798662
OBJ38812_TMT10_p2.txt	1	OBJ38812_TMT10_p2.txt_1	128C	A0A087WQM0_MOUSE|A0A087WQM0	14.0666	WT_Uninfect_3	WT_Uninfect	NA	Model	NA	NA	Model	17158.3	242410	0.070782
OBJ38812_TMT10_p2.txt	1	OBJ38812_TMT10_p2.txt_1	131C	A0A087WQM0_MOUSE|A0A087WQM0	14.6314	WT_Uninfect_4	WT_Uninfect	NA	Model	NA	NA	Model	25380.7	242410	0.104701
OBJ38812_TMT10.txt	1	OBJ38812_TMT10.txt_1	127N	A0A087WQM0_MOUSE|A0A087WQM0	14.0665	KO_Early_1	KO_Early	NA	Model	NA	NA	Model	17156.5	237802	0.072146
OBJ38812_TMT10.txt	1	OBJ38812_TMT10.txt_1	130N	A0A087WQM0_MOUSE|A0A087WQM0	14.4173	KO_Early_2	KO_Early	NA	Model	NA	NA	Model	21878.9	237802	0.0920045
OBJ38812_TMT10.txt	1	OBJ38812_TMT10.txt_1	128N	A0A087WQM0_MOUSE|A0A087WQM0	14.0833	KO_Late_1	KO_Late	NA	Model	NA	NA	Model	17358.4	237802	0.0729952
OBJ38812_TMT10.txt	1	OBJ38812_TMT10.txt_1	131N	A0A087WQM0_MOUSE|A0A087WQM0	14.2692	KO_Late_2	KO_Late	NA	Model	NA	NA	Model	19745.7	237802	0.0830339
OBJ38812_TMT10.txt	1	OBJ38812_TMT10.txt_1	129N	A0A087WQM0_MOUSE|A0A087WQM0	13.7502	KO_Uninfect_1	KO_Uninfect	NA	Model	NA	NA	Model	13779.5	237802	0.0579452
OBJ38812_TMT10.txt	1	OBJ38812_TMT10.txt_1	131C	A0A087WQM0_MOUSE|A0A087WQM0	14.165	KO_Uninfect_2	KO_Uninfect	NA	Model	NA	NA	Model	18368.6	237802	0.077243
OBJ38812_TMT10.txt	1	OBJ38812_TMT10.txt_1	126C	A0A087WQM0_MOUSE|A0A087WQM0	14.0652	WT_Early_1	WT_Early	NA	Model	NA	NA	Model	17140.8	237802	0.0720802
OBJ38812_TMT10.txt	1	OBJ38812_TMT10.txt_1	129C	A0A087WQM0_MOUSE|A0A087WQM0	14.737	WT_Early_2	WT_Early	NA	Model	NA	NA	Model	27307.8	237802	0.114834
OBJ38812_TMT10.txt	1	OBJ38812_TMT10.txt_1	127C	A0A087WQM0_MOUSE|A0A087WQM0	14.3819	WT_Late_1	WT_Late	NA	Model	NA	NA	Model	21349.9	237802	0.0897801
OBJ38812_TMT10.txt	1	OBJ38812_TMT10.txt_1	130C	A0A087WQM0_MOUSE|A0A087WQM0	14.6785	WT_Late_2	WT_Late	NA	Model	NA	NA	Model	26222.5	237802	0.11027
OBJ38812_TMT10.txt	1	OBJ38812_TMT10.txt_1	128C	A0A087WQM0_MOUSE|A0A087WQM0	14.1281	WT_Uninfect_1	WT_Uninfect	NA	Model	NA	NA	Model	17905.2	237802	0.0752943
OBJ38812_TMT10_p2.txt	1	OBJ38812_TMT10_p2.txt_1	127N	A0A087WS73_MOUSE|A0A087WS73	14.1531	KO_Early_3	KO_Early	NA	Model	NA	NA	Model	18218	283481	0.0642654
OBJ38812_TMT10_p2.txt	1	OBJ38812_TMT10_p2.txt_1	130N	A0A087WS73_MOUSE|A0A087WS73	14.6803	KO_Early_4	KO_Early	NA	Model	NA	NA	Model	26254	283481	0.0926131
OBJ38812_TMT10_p2.txt	1	OBJ38812_TMT10_p2.txt_1	128N	A0A087WS73_MOUSE|A0A087WS73	14.4376	KO_Late_3	KO_Late	NA	Model	NA	NA	Model	22189.1	283481	0.0782738
OBJ38812_TMT10_p2.txt	1	OBJ38812_TMT10_p2.txt_1	131N	A0A087WS73_MOUSE|A0A087WS73	14.6452	KO_Late_4	KO_Late	NA	Model	NA	NA	Model	25624.3	283481	0.0903919
OBJ38812_TMT10_p2.txt	1	OBJ38812_TMT10_p2.txt_1	129N	A0A087WS73_MOUSE|A0A087WS73	14.4171	KO_Uninfect_3	KO_Uninfect	NA	Model	NA	NA	Model	21876	283481	0.0771694
OBJ38812_TMT10_p2.txt	1	OBJ38812_TMT10_p2.txt_1	126C	A0A087WS73_MOUSE|A0A087WS73	14.5835	WT_Early_3	WT_Early	NA	Model	NA	NA	Model	24551.8	283481	0.0866082
OBJ38812_TMT10_p2.txt	1	OBJ38812_TMT10_p2.txt_1	129C	A0A087WS73_MOUSE|A0A087WS73	14.1785	WT_Early_4	WT_Early	NA	Model	NA	NA	Model	18542.3	283481	0.0654094
OBJ38812_TMT10_p2.txt	1	OBJ38812_TMT10_p2.txt_1	127C	A0A087WS73_MOUSE|A0A087WS73	14.653	WT_Late_3	WT_Late	NA	Model	NA	NA	Model	25763.6	283481	0.0908832
OBJ38812_TMT10_p2.txt	1	OBJ38812_TMT10_p2.txt_1	130C	A0A087WS73_MOUSE|A0A087WS73	14.6091	WT_Late_4	WT_Late	NA	Model	NA	NA	Model	24991.3	283481	0.0881588
OBJ38812_TMT10_p2.txt	1	OBJ38812_TMT10_p2.txt_1	128C	A0A087WS73_MOUSE|A0A087WS73	14.32	WT_Uninfect_3	WT_Uninfect	NA	Model	NA	NA	Model	20452.6	283481	0.0721481
OBJ38812_TMT10_p2.txt	1	OBJ38812_TMT10_p2.txt_1	131C	A0A087WS73_MOUSE|A0A087WS73	14.9819	WT_Uninfect_4	WT_Uninfect	NA	Model	NA	NA	Model	32359.4	283481	0.11415
OBJ38812_TMT10.txt	1	OBJ38812_TMT10.txt_1	127N	A0A087WS73_MOUSE|A0A087WS73	14.3936	KO_Early_1	KO_Early	NA	Model	NA	NA	Model	21523	272347	0.0790278
OBJ38812_TMT10.txt	1	OBJ38812_TMT10.txt_1	130N	A0A087WS73_MOUSE|A0A087WS73	14.5119	KO_Early_2	KO_Early	NA	Model	NA	NA	Model	23361.7	272347	0.0857794
OBJ38812_TMT10.txt	1	OBJ38812_TMT10.txt_1	128N	A0A087WS73_MOUSE|A0A087WS73	14.192	KO_Late_1	KO_Late	NA	Model	NA	NA	Model	18716	272347	0.0687211
OBJ38812_TMT10.txt	1	OBJ38812_TMT10.txt_1	131N	A0A087WS73_MOUSE|A0A087WS73	14.4389	KO_Late_2	KO_Late	NA	Model	NA	NA	Model	22210	272347	0.0815505
OBJ38812_TMT10.txt	1	OBJ38812_TMT10.txt_1	129N	A0A087WS73_MOUSE|A0A087WS73	14.7063	KO_Uninfect_1	KO_Uninfect	NA	Model	NA	NA	Model	26733.2	272347	0.0981586
OBJ38812_TMT10.txt	1	OBJ38812_TMT10.txt_1	131C	A0A087WS73_MOUSE|A0A087WS73	14.4303	KO_Uninfect_2	KO_Uninfect	NA	Model	NA	NA	Model	22078.4	272347	0.0810671
OBJ38812_TMT10.txt	1	OBJ38812_TMT10.txt_1	126C	A0A087WS73_MOUSE|A0A087WS73	14.3576	WT_Early_1	WT_Early	NA	Model	NA	NA	Model	20992.2	272347	0.0770789
OBJ38812_TMT10.txt	1	OBJ38812_TMT10.txt_1	129C	A0A087WS73_MOUSE|A0A087WS73	14.6343	WT_Early_2	WT_Early	NA	Model	NA	NA	Model	25431.7	272347	0.0933797
OBJ38812_TMT10.txt	1	OBJ38812_TMT10.txt_1	127C	A0A087WS73_MOUSE|A0A087WS73	14.4738	WT_Late_1	WT_Late	NA	Model	NA	NA	Model	22753.8	272347	0.083547
OBJ38812_TMT10.txt	1	OBJ38812_TMT10.txt_1	130C	A0A087WS73_MOUSE|A0A087WS73	14.5469	WT_Late_2	WT_Late	NA	Model	NA	NA	Model	23936.3	272347	0.0878892
OBJ38812_TMT10.txt	1	OBJ38812_TMT10.txt_1	128C	A0A087WS73_MOUSE|A0A087WS73	14.4221	WT_Uninfect_1	WT_Uninfect	NA	Model	NA	NA	Model	21952.5	272347	0.0806048
OBJ38812_TMT10_p2.txt	1	OBJ38812_TMT10_p2.txt_1	127N	A0A0A0MQ82_MOUSE|A0A0A0MQ82	14.7949	KO_Early_3	KO_Early	NA	Model	NA	NA	Model	28424.9	309133	0.0919503
OBJ38812_TMT10_p2.txt	1	OBJ38812_TMT10_p2.txt_1	130N	A0A0A0MQ82_MOUSE|A0A0A0MQ82	14.5606	KO_Early_4	KO_Early	NA	Model	NA	NA	Model	24165.3	309133	0.0781711
OBJ38812_TMT10_p2.txt	1	OBJ38812_TMT10_p2.txt_1	128N	A0A0A0MQ82_MOUSE|A0A0A0MQ82	14.9416	KO_Late_3	KO_Late	NA	Model	NA	NA	Model	31467.1	309133	0.101792
OBJ38812_TMT10_p2.txt	1	OBJ38812_TMT10_p2.txt_1	131N	A0A0A0MQ82_MOUSE|A0A0A0MQ82	14.7906	KO_Late_4	KO_Late	NA	Model	NA	NA	Model	28341.3	309133	0.0916797
OBJ38812_TMT10_p2.txt	1	OBJ38812_TMT10_p2.txt_1	129N	A0A0A0MQ82_MOUSE|A0A0A0MQ82	14.6207	KO_Uninfect_3	KO_Uninfect	NA	Model	NA	NA	Model	25192	309133	0.0814923
OBJ38812_TMT10_p2.txt	1	OBJ38812_TMT10_p2.txt_1	126C	A0A0A0MQ82_MOUSE|A0A0A0MQ82	14.4849	WT_Early_3	WT_Early	NA	Model	NA	NA	Model	22928.7	309133	0.0741709
OBJ38812_TMT10_p2.txt	1	OBJ38812_TMT10_p2.txt_1	129C	A0A0A0MQ82_MOUSE|A0A0A0MQ82	14.4842	WT_Early_4	WT_Early	NA	Model	NA	NA	Model	22917.6	309133	0.0741352
OBJ38812_TMT10_p2.txt	1	OBJ38812_TMT10_p2.txt_1	127C	A0A0A0MQ82_MOUSE|A0A0A0MQ82	14.478	WT_Late_3	WT_Late	NA	Model	NA	NA	Model	22819.1	309133	0.0738165
OBJ38812_TMT10_p2.txt	1	OBJ38812_TMT10_p2.txt_1	130C	A0A0A0MQ82_MOUSE|A0A0A0MQ82	14.5207	WT_Late_4	WT_Late	NA	Model	NA	NA	Model	23505.7	309133	0.0760373
OBJ38812_TMT10_p2.txt	1	OBJ38812_TMT10_p2.txt_1	128C	A0A0A0MQ82_MOUSE|A0A0A0MQ82	14.7281	WT_Uninfect_3	WT_Uninfect	NA	Model	NA	NA	Model	27140	309133	0.0877939
OBJ38812_TMT10_p2.txt	1	OBJ38812_TMT10_p2.txt_1	131C	A0A0A0MQ82_MOUSE|A0A0A0MQ82	14.7041	WT_Uninfect_4	WT_Uninfect	NA	Model	NA	NA	Model	26692.4	309133	0.086346
OBJ38812_TMT10_p2.txt	1	OBJ38812_TMT10_p2.txt_1	127N	A0A0A0MQ99_MOUSE|A0A0A0MQ99	15.7268	KO_Early_3	KO_Early	NA	Model	NA	NA	Model	54229.8	527819	0.102743
OBJ38812_TMT10_p2.txt	1	OBJ38812_TMT10_p2.txt_1	130N	A0A0A0MQ99_MOUSE|A0A0A0MQ99	14.8732	KO_Early_4	KO_Early	NA	Model	NA	NA	Model	30010.2	527819	0.0568571
OBJ38812_TMT10_p2.txt	1	OBJ38812_TMT10_p2.txt_1	128N	A0A0A0MQ99_MOUSE|A0A0A0MQ99	15.4185	KO_Late_3	KO_Late	NA	Model	NA	NA	Model	43795.3	527819	0.0829741
OBJ38812_TMT10_p2.txt	1	OBJ38812_TMT10_p2.txt_1	131N	A0A0A0MQ99_MOUSE|A0A0A0MQ99	15.3513	KO_Late_4	KO_Late	NA	Model	NA	NA	Model	41802.7	527819	0.0791989
OBJ38812_TMT10_p2.txt	1	OBJ38812_TMT10_p2.txt_1	129N	A0A0A0MQ99_MOUSE|A0A0A0MQ99	15.4263	KO_Uninfect_3	KO_Uninfect	NA	Model	NA	NA	Model	44034.3	527819	0.083427
OBJ38812_TMT10_p2.txt	1	OBJ38812_TMT10_p2.txt_1	126C	A0A0A0MQ99_MOUSE|A0A0A0MQ99	15.8025	WT_Early_3	WT_Early	NA	Model	NA	NA	Model	57151	527819	0.108278
OBJ38812_TMT10_p2.txt	1	OBJ38812_TMT10_p2.txt_1	129C	A0A0A0MQ99_MOUSE|A0A0A0MQ99	15.6346	WT_Early_4	WT_Early	NA	Model	NA	NA	Model	50873.9	527819	0.0963851
OBJ38812_TMT10_p2.txt	1	OBJ38812_TMT10_p2.txt_1	127C	A0A0A0MQ99_MOUSE|A0A0A0MQ99	15.5631	WT_Late_3	WT_Late	NA	Model	NA	NA	Model	48414.2	527819	0.0917252
OBJ38812_TMT10_p2.txt	1	OBJ38812_TMT10_p2.txt_1	130C	A0A0A0MQ99_MOUSE|A0A0A0MQ99	15.4996	WT_Late_4	WT_Late	NA	Model	NA	NA	Model	46328.5	527819	0.0877735
OBJ38812_TMT10_p2.txt	1	OBJ38812_TMT10_p2.txt_1	128C	A0A0A0MQ99_MOUSE|A0A0A0MQ99	14.5024	WT_Uninfect_3	WT_Uninfect	NA	Model	NA	NA	Model	23208.8	527819	0.0439712
OBJ38812_TMT10_p2.txt	1	OBJ38812_TMT10_p2.txt_1	131C	A0A0A0MQ99_MOUSE|A0A0A0MQ99	15.4683	WT_Uninfect_4	WT_Uninfect	NA	Model	NA	NA	Model	45332.3	527819	0.0858862
OBJ38812_TMT10.txt	1	OBJ38812_TMT10.txt_1	127N	A0A0A0MQ99_MOUSE|A0A0A0MQ99	15.4778	KO_Early_1	KO_Early	NA	Model	NA	NA	Model	45632.6	505695	0.0902374
OBJ38812_TMT10.txt	1	OBJ38812_TMT10.txt_1	130N	A0A0A0MQ99_MOUSE|A0A0A0MQ99	15.2198	KO_Early_2	KO_Early	NA	Model	NA	NA	Model	38161.8	505695	0.0754641
OBJ38812_TMT10.txt	1	OBJ38812_TMT10.txt_1	128N	A0A0A0MQ99_MOUSE|A0A0A0MQ99	15.1018	KO_Late_1	KO_Late	NA	Model	NA	NA	Model	35163.7	505695	0.0695355
OBJ38812_TMT10.txt	1	OBJ38812_TMT10.txt_1	131N	A0A0A0MQ99_MOUSE|A0A0A0MQ99	15.3357	KO_Late_2	KO_Late	NA	Model	NA	NA	Model	41352.4	505695	0.0817735
OBJ38812_TMT10.txt	1	OBJ38812_TMT10.txt_1	129N	A0A0A0MQ99_MOUSE|A0A0A0MQ99	15.2826	KO_Uninfect_1	KO_Uninfect	NA	Model	NA	NA	Model	39858.9	505695	0.07882
OBJ38812_TMT10.txt	1	OBJ38812_TMT10.txt_1	131C	A0A0A0MQ99_MOUSE|A0A0A0MQ99	15.0693	KO_Uninfect_2	KO_Uninfect	NA	Model	NA	NA	Model	34380.7	505695	0.067987
OBJ38812_TMT10.txt	1	OBJ38812_TMT10.txt_1	126C	A0A0A0MQ99_MOUSE|A0A0A0MQ99	15.2946	WT_Early_1	WT_Early	NA	Model	NA	NA	Model	40190.8	505695	0.0794764
OBJ38812_TMT10.txt	1	OBJ38812_TMT10.txt_1	129C	A0A0A0MQ99_MOUSE|A0A0A0MQ99	15.5124	WT_Early_2	WT_Early	NA	Model	NA	NA	Model	46739.5	505695	0.0924264
OBJ38812_TMT10.txt	1	OBJ38812_TMT10.txt_1	127C	A0A0A0MQ99_MOUSE|A0A0A0MQ99	15.4419	WT_Late_1	WT_Late	NA	Model	NA	NA	Model	44511.1	505695	0.0880197
OBJ38812_TMT10.txt	1	OBJ38812_TMT10.txt_1	130C	A0A0A0MQ99_MOUSE|A0A0A0MQ99	15.5194	WT_Late_2	WT_Late	NA	Model	NA	NA	Model	46966.8	505695	0.0928759
OBJ38812_TMT10.txt	1	OBJ38812_TMT10.txt_1	128C	A0A0A0MQ99_MOUSE|A0A0A0MQ99	15.6125	WT_Uninfect_1	WT_Uninfect	NA	Model	NA	NA	Model	50098.8	505695	0.0990692
OBJ38812_TMT10_p2.txt	1	OBJ38812_TMT10_p2.txt_1	127N	A0A0A0UCD5_MOUSE|A0A0A0UCD5	15.7369	KO_Early_3	KO_Early	NA	Model	NA	NA	Model	54612.6	1.01196e+06	0.0539669
OBJ38812_TMT10_p2.txt	1	OBJ38812_TMT10_p2.txt_1	130N	A0A0A0UCD5_MOUSE|A0A0A0UCD5	15.9004	KO_Early_4	KO_Early	NA	Model	NA	NA	Model	61165.7	1.01196e+06	0.0604425
OBJ38812_TMT10_p2.txt	1	OBJ38812_TMT10_p2.txt_1	128N	A0A0A0UCD5_MOUSE|A0A0A0UCD5	16.0344	KO_Late_3	KO_Late	NA	Model	NA	NA	Model	67115.4	1.01196e+06	0.0663219
OBJ38812_TMT10_p2.txt	1	OBJ38812_TMT10_p2.txt_1	131N	A0A0A0UCD5_MOUSE|A0A0A0UCD5	16.266	KO_Late_4	KO_Late	NA	Model	NA	NA	Model	78807.6	1.01196e+06	0.0778759
OBJ38812_TMT10_p2.txt	1	OBJ38812_TMT10_p2.txt_1	129N	A0A0A0UCD5_MOUSE|A0A0A0UCD5	16.0154	KO_Uninfect_3	KO_Uninfect	NA	Model	NA	NA	Model	66238.9	1.01196e+06	0.0654558
OBJ38812_TMT10_p2.txt	1	OBJ38812_TMT10_p2.txt_1	126C	A0A0A0UCD5_MOUSE|A0A0A0UCD5	16.7369	WT_Early_3	WT_Early	NA	Model	NA	NA	Model	109223	1.01196e+06	0.107931
OBJ38812_TMT10_p2.txt	1	OBJ38812_TMT10_p2.txt_1	129C	A0A0A0UCD5_MOUSE|A0A0A0UCD5	16.4081	WT_Early_4	WT_Early	NA	Model	NA	NA	Model	86962	1.01196e+06	0.0859338
OBJ38812_TMT10_p2.txt	1	OBJ38812_TMT10_p2.txt_1	127C	A0A0A0UCD5_MOUSE|A0A0A0UCD5	16.8393	WT_Late_3	WT_Late	NA	Model	NA	NA	Model	117258	1.01196e+06	0.115872
OBJ38812_TMT10_p2.txt	1	OBJ38812_TMT10_p2.txt_1	130C	A0A0A0UCD5_MOUSE|A0A0A0UCD5	16.4841	WT_Late_4	WT_Late	NA	Model	NA	NA	Model	91666.3	1.01196e+06	0.0905825
OBJ38812_TMT10_p2.txt	1	OBJ38812_TMT10_p2.txt_1	128C	A0A0A0UCD5_MOUSE|A0A0A0UCD5	16.5576	WT_Uninfect_3	WT_Uninfect	NA	Model	NA	NA	Model	96454.1	1.01196e+06	0.0953137
OBJ38812_TMT10_p2.txt	1	OBJ38812_TMT10_p2.txt_1	131C	A0A0A0UCD5_MOUSE|A0A0A0UCD5	16.6367	WT_Uninfect_4	WT_Uninfect	NA	Model	NA	NA	Model	101893	1.01196e+06	0.100689
OBJ38812_TMT10.txt	1	OBJ38812_TMT10.txt_1	127N	A0A0A0UCD5_MOUSE|A0A0A0UCD5	16.1133	KO_Early_1	KO_Early	NA	Model	NA	NA	Model	70891.1	971882	0.0729421
OBJ38812_TMT10.txt	1	OBJ38812_TMT10.txt_1	130N	A0A0A0UCD5_MOUSE|A0A0A0UCD5	15.8145	KO_Early_2	KO_Early	NA	Model	NA	NA	Model	57629.6	971882	0.0592969
OBJ38812_TMT10.txt	1	OBJ38812_TMT10.txt_1	128N	A0A0A0UCD5_MOUSE|A0A0A0UCD5	16.13	KO_Late_1	KO_Late	NA	Model	NA	NA	Model	71717.7	971882	0.0737926
OBJ38812_TMT10.txt	1	OBJ38812_TMT10.txt_1	131N	A0A0A0UCD5_MOUSE|A0A0A0UCD5	16.1847	KO_Late_2	KO_Late	NA	Model	NA	NA	Model	74484.4	971882	0.0766393
OBJ38812_TMT10.txt	1	OBJ38812_TMT10.txt_1	129N	A0A0A0UCD5_MOUSE|A0A0A0UCD5	15.9375	KO_Uninfect_1	KO_Uninfect	NA	Model	NA	NA	Model	62756.2	971882	0.0645718
OBJ38812_TMT10.txt	1	OBJ38812_TMT10.txt_1	131C	A0A0A0UCD5_MOUSE|A0A0A0UCD5	16.0651	KO_Uninfect_2	KO_Uninfect	NA	Model	NA	NA	Model	68559.2	971882	0.0705427
OBJ38812_TMT10.txt	1	OBJ38812_TMT10.txt_1	126C	A0A0A0UCD5_MOUSE|A0A0A0UCD5	16.4009	WT_Early_1	WT_Early	NA	Model	NA	NA	Model	86531.9	971882	0.0890354
OBJ38812_TMT10.txt	1	OBJ38812_TMT10.txt_1	129C	A0A0A0UCD5_MOUSE|A0A0A0UCD5	16.6579	WT_Early_2	WT_Early	NA	Model	NA	NA	Model	103404	971882	0.106396
OBJ38812_TMT10.txt	1	OBJ38812_TMT10.txt_1	127C	A0A0A0UCD5_MOUSE|A0A0A0UCD5	16.5861	WT_Late_1	WT_Late	NA	Model	NA	NA	Model	98380.2	971882	0.101226
OBJ38812_TMT10.txt	1	OBJ38812_TMT10.txt_1	130C	A0A0A0UCD5_MOUSE|A0A0A0UCD5	16.7508	WT_Late_2	WT_Late	NA	Model	NA	NA	Model	110282	971882	0.113473
OBJ38812_TMT10.txt	1	OBJ38812_TMT10.txt_1	128C	A0A0A0UCD5_MOUSE|A0A0A0UCD5	16.4034	WT_Uninfect_1	WT_Uninfect	NA	Model	NA	NA	Model	86677.9	971882	0.0891856
OBJ38812_TMT10_p2.txt	1	OBJ38812_TMT10_p2.txt_1	127N	A0A0A6YWG7_MOUSE|A0A0A6YWG7	16.3432	KO_Early_3	KO_Early	NA	Model	NA	NA	Model	83137.7	1.57434e+06	0.0528079
OBJ38812_TMT10_p2.txt	1	OBJ38812_TMT10_p2.txt_1	130N	A0A0A6YWG7_MOUSE|A0A0A6YWG7	16.2433	KO_Early_4	KO_Early	NA	Model	NA	NA	Model	77572.9	1.57434e+06	0.0492733
OBJ38812_TMT10_p2.txt	1	OBJ38812_TMT10_p2.txt_1	128N	A0A0A6YWG7_MOUSE|A0A0A6YWG7	17.3131	KO_Late_3	KO_Late	NA	Model	NA	NA	Model	162842	1.57434e+06	0.103435
OBJ38812_TMT10_p2.txt	1	OBJ38812_TMT10_p2.txt_1	131N	A0A0A6YWG7_MOUSE|A0A0A6YWG7	17.5889	KO_Late_4	KO_Late	NA	Model	NA	NA	Model	197150	1.57434e+06	0.125227
OBJ38812_TMT10_p2.txt	1	OBJ38812_TMT10_p2.txt_1	129N	A0A0A6YWG7_MOUSE|A0A0A6YWG7	16.3347	KO_Uninfect_3	KO_Uninfect	NA	Model	NA	NA	Model	82649.9	1.57434e+06	0.0524981
OBJ38812_TMT10_p2.txt	1	OBJ38812_TMT10_p2.txt_1	126C	A0A0A6YWG7_MOUSE|A0A0A6YWG7	16.4052	WT_Early_3	WT_Early	NA	Model	NA	NA	Model	86787.7	1.57434e+06	0.0551264
OBJ38812_TMT10_p2.txt	1	OBJ38812_TMT10_p2.txt_1	129C	A0A0A6YWG7_MOUSE|A0A0A6YWG7	16.2025	WT_Early_4	WT_Early	NA	Model	NA	NA	Model	75412.9	1.57434e+06	0.0479012
OBJ38812_TMT10_p2.txt	1	OBJ38812_TMT10_p2.txt_1	127C	A0A0A6YWG7_MOUSE|A0A0A6YWG7	17.8248	WT_Late_3	WT_Late	NA	Model	NA	NA	Model	232166	1.57434e+06	0.147469
OBJ38812_TMT10_p2.txt	1	OBJ38812_TMT10_p2.txt_1	130C	A0A0A6YWG7_MOUSE|A0A0A6YWG7	17.8796	WT_Late_4	WT_Late	NA	Model	NA	NA	Model	241154	1.57434e+06	0.153178
OBJ38812_TMT10_p2.txt	1	OBJ38812_TMT10_p2.txt_1	128C	A0A0A6YWG7_MOUSE|A0A0A6YWG7	16.4871	WT_Uninfect_3	WT_Uninfect	NA	Model	NA	NA	Model	91856	1.57434e+06	0.0583457
OBJ38812_TMT10_p2.txt	1	OBJ38812_TMT10_p2.txt_1	131C	A0A0A6YWG7_MOUSE|A0A0A6YWG7	16.9255	WT_Uninfect_4	WT_Uninfect	NA	Model	NA	NA	Model	124477	1.57434e+06	0.0790662
OBJ38812_TMT10_p2.txt	1	OBJ38812_TMT10_p2.txt_1	127N	A0A0A6YX61_MOUSE|A0A0A6YX61	17.3256	KO_Early_3	KO_Early	NA	Model	NA	NA	Model	164257	1.84057e+06	0.0892426
OBJ38812_TMT10_p2.txt	1	OBJ38812_TMT10_p2.txt_1	130N	A0A0A6YX61_MOUSE|A0A0A6YX61	17.4599	KO_Early_4	KO_Early	NA	Model	NA	NA	Model	180280	1.84057e+06	0.0979479
OBJ38812_TMT10_p2.txt	1	OBJ38812_TMT10_p2.txt_1	128N	A0A0A6YX61_MOUSE|A0A0A6YX61	17.5826	KO_Late_3	KO_Late	NA	Model	NA	NA	Model	196281	1.84057e+06	0.106642
OBJ38812_TMT10_p2.txt	1	OBJ38812_TMT10_p2.txt_1	131N	A0A0A6YX61_MOUSE|A0A0A6YX61	17.4453	KO_Late_4	KO_Late	NA	Model	NA	NA	Model	178470	1.84057e+06	0.0969648
OBJ38812_TMT10_p2.txt	1	OBJ38812_TMT10_p2.txt_1	129N	A0A0A6YX61_MOUSE|A0A0A6YX61	16.8906	KO_Uninfect_3	KO_Uninfect	NA	Model	NA	NA	Model	121497	1.84057e+06	0.0660108
OBJ38812_TMT10_p2.txt	1	OBJ38812_TMT10_p2.txt_1	126C	A0A0A6YX61_MOUSE|A0A0A6YX61	16.8876	WT_Early_3	WT_Early	NA	Model	NA	NA	Model	121247	1.84057e+06	0.0658749
OBJ38812_TMT10_p2.txt	1	OBJ38812_TMT10_p2.txt_1	129C	A0A0A6YX61_MOUSE|A0A0A6YX61	16.7929	WT_Early_4	WT_Early	NA	Model	NA	NA	Model	113542	1.84057e+06	0.0616886
OBJ38812_TMT10_p2.txt	1	OBJ38812_TMT10_p2.txt_1	127C	A0A0A6YX61_MOUSE|A0A0A6YX61	16.799	WT_Late_3	WT_Late	NA	Model	NA	NA	Model	114024	1.84057e+06	0.0619508
OBJ38812_TMT10_p2.txt	1	OBJ38812_TMT10_p2.txt_1	130C	A0A0A6YX61_MOUSE|A0A0A6YX61	16.9057	WT_Late_4	WT_Late	NA	Model	NA	NA	Model	122781	1.84057e+06	0.0667084
OBJ38812_TMT10_p2.txt	1	OBJ38812_TMT10_p2.txt_1	128C	A0A0A6YX61_MOUSE|A0A0A6YX61	17.5114	WT_Uninfect_3	WT_Uninfect	NA	Model	NA	NA	Model	186833	1.84057e+06	0.101508
OBJ38812_TMT10_p2.txt	1	OBJ38812_TMT10_p2.txt_1	131C	A0A0A6YX61_MOUSE|A0A0A6YX61	17.5724	WT_Uninfect_4	WT_Uninfect	NA	Model	NA	NA	Model	194904	1.84057e+06	0.105893
OBJ38812_TMT10_p2.txt	1	OBJ38812_TMT10_p2.txt_1	127N	A0A0A6YXE5_MOUSE|A0A0A6YXE5	14.1075	KO_Early_3	KO_Early	NA	Model	NA	NA	Model	17651.9	206476	0.0854915
OBJ38812_TMT10_p2.txt	1	OBJ38812_TMT10_p2.txt_1	130N	A0A0A6YXE5_MOUSE|A0A0A6YXE5	14.0935	KO_Early_4	KO_Early	NA	Model	NA	NA	Model	17481.5	206476	0.0846663
OBJ38812_TMT10_p2.txt	1	OBJ38812_TMT10_p2.txt_1	128N	A0A0A6YXE5_MOUSE|A0A0A6YXE5	14.105	KO_Late_3	KO_Late	NA	Model	NA	NA	Model	17620.5	206476	0.0853396
OBJ38812_TMT10_p2.txt	1	OBJ38812_TMT10_p2.txt_1	131N	A0A0A6YXE5_MOUSE|A0A0A6YXE5	14.351	KO_Late_4	KO_Late	NA	Model	NA	NA	Model	20897.1	206476	0.101209
OBJ38812_TMT10_p2.txt	1	OBJ38812_TMT10_p2.txt_1	129N	A0A0A6YXE5_MOUSE|A0A0A6YXE5	14.3806	KO_Uninfect_3	KO_Uninfect	NA	Model	NA	NA	Model	21330.5	206476	0.103307
OBJ38812_TMT10_p2.txt	1	OBJ38812_TMT10_p2.txt_1	126C	A0A0A6YXE5_MOUSE|A0A0A6YXE5	13.9893	WT_Early_3	WT_Early	NA	Model	NA	NA	Model	16262.6	206476	0.0787627
OBJ38812_TMT10_p2.txt	1	OBJ38812_TMT10_p2.txt_1	129C	A0A0A6YXE5_MOUSE|A0A0A6YXE5	14.0341	WT_Early_4	WT_Early	NA	Model	NA	NA	Model	16775.7	206476	0.0812481
OBJ38812_TMT10_p2.txt	1	OBJ38812_TMT10_p2.txt_1	127C	A0A0A6YXE5_MOUSE|A0A0A6YXE5	13.8918	WT_Late_3	WT_Late	NA	Model	NA	NA	Model	15200.4	206476	0.0736186
OBJ38812_TMT10_p2.txt	1	OBJ38812_TMT10_p2.txt_1	130C	A0A0A6YXE5_MOUSE|A0A0A6YXE5	13.9864	WT_Late_4	WT_Late	NA	Model	NA	NA	Model	16229.7	206476	0.0786037
OBJ38812_TMT10_p2.txt	1	OBJ38812_TMT10_p2.txt_1	128C	A0A0A6YXE5_MOUSE|A0A0A6YXE5	14.3941	WT_Uninfect_3	WT_Uninfect	NA	Model	NA	NA	Model	21530.5	206476	0.104276
OBJ38812_TMT10_p2.txt	1	OBJ38812_TMT10_p2.txt_1	131C	A0A0A6YXE5_MOUSE|A0A0A6YXE5	12.8774	WT_Uninfect_4	WT_Uninfect	NA	Model	NA	NA	Model	7524.76	206476	0.0364438
OBJ38812_TMT10_p2.txt	1	OBJ38812_TMT10_p2.txt_1	127N	A0A0A6YXJ2_MOUSE|A0A0A6YXJ2	15.7363	KO_Early_3	KO_Early	NA	Model	NA	NA	Model	54586.9	960104	0.0568552
OBJ38812_TMT10_p2.txt	1	OBJ38812_TMT10_p2.txt_1	130N	A0A0A6YXJ2_MOUSE|A0A0A6YXJ2	15.7227	KO_Early_4	KO_Early	NA	Model	NA	NA	Model	54076.7	960104	0.0563237
OBJ38812_TMT10_p2.txt	1	OBJ38812_TMT10_p2.txt_1	128N	A0A0A6YXJ2_MOUSE|A0A0A6YXJ2	15.9214	KO_Late_3	KO_Late	NA	Model	NA	NA	Model	62063.2	960104	0.0646421
OBJ38812_TMT10_p2.txt	1	OBJ38812_TMT10_p2.txt_1	131N	A0A0A6YXJ2_MOUSE|A0A0A6YXJ2	16.0685	KO_Late_4	KO_Late	NA	Model	NA	NA	Model	68724.7	960104	0.0715804
OBJ38812_TMT10_p2.txt	1	OBJ38812_TMT10_p2.txt_1	129N	A0A0A6YXJ2_MOUSE|A0A0A6YXJ2	15.8322	KO_Uninfect_3	KO_Uninfect	NA	Model	NA	NA	Model	58342	960104	0.0607663
OBJ38812_TMT10_p2.txt	1	OBJ38812_TMT10_p2.txt_1	126C	A0A0A6YXJ2_MOUSE|A0A0A6YXJ2	16.5697	WT_Early_3	WT_Early	NA	Model	NA	NA	Model	97271.8	960104	0.101314
OBJ38812_TMT10_p2.txt	1	OBJ38812_TMT10_p2.txt_1	129C	A0A0A6YXJ2_MOUSE|A0A0A6YXJ2	16.2809	WT_Early_4	WT_Early	NA	Model	NA	NA	Model	79625.3	960104	0.082934
OBJ38812_TMT10_p2.txt	1	OBJ38812_TMT10_p2.txt_1	127C	A0A0A6YXJ2_MOUSE|A0A0A6YXJ2	16.6357	WT_Late_3	WT_Late	NA	Model	NA	NA	Model	101819	960104	0.10605
OBJ38812_TMT10_p2.txt	1	OBJ38812_TMT10_p2.txt_1	130C	A0A0A6YXJ2_MOUSE|A0A0A6YXJ2	16.4339	WT_Late_4	WT_Late	NA	Model	NA	NA	Model	88529.4	960104	0.0922081
OBJ38812_TMT10_p2.txt	1	OBJ38812_TMT10_p2.txt_1	128C	A0A0A6YXJ2_MOUSE|A0A0A6YXJ2	16.9473	WT_Uninfect_3	WT_Uninfect	NA	Model	NA	NA	Model	126367	960104	0.131618
OBJ38812_TMT10_p2.txt	1	OBJ38812_TMT10_p2.txt_1	131C	A0A0A6YXJ2_MOUSE|A0A0A6YXJ2	16.4993	WT_Uninfect_4	WT_Uninfect	NA	Model	NA	NA	Model	92637.4	960104	0.0964868
OBJ38812_TMT10.txt	1	OBJ38812_TMT10.txt_1	127N	A0A0A6YXJ2_MOUSE|A0A0A6YXJ2	15.9385	KO_Early_1	KO_Early	NA	Model	NA	NA	Model	62801.4	908475	0.0691284
OBJ38812_TMT10.txt	1	OBJ38812_TMT10.txt_1	130N	A0A0A6YXJ2_MOUSE|A0A0A6YXJ2	15.7709	KO_Early_2	KO_Early	NA	Model	NA	NA	Model	55913.1	908475	0.0615462
OBJ38812_TMT10.txt	1	OBJ38812_TMT10.txt_1	128N	A0A0A6YXJ2_MOUSE|A0A0A6YXJ2	16.2502	KO_Late_1	KO_Late	NA	Model	NA	NA	Model	77944.4	908475	0.085797
OBJ38812_TMT10.txt	1	OBJ38812_TMT10.txt_1	131N	A0A0A6YXJ2_MOUSE|A0A0A6YXJ2	16.0239	KO_Late_2	KO_Late	NA	Model	NA	NA	Model	66630.2	908475	0.073343
OBJ38812_TMT10.txt	1	OBJ38812_TMT10.txt_1	129N	A0A0A6YXJ2_MOUSE|A0A0A6YXJ2	16.1282	KO_Uninfect_1	KO_Uninfect	NA	Model	NA	NA	Model	71624.2	908475	0.07884
OBJ38812_TMT10.txt	1	OBJ38812_TMT10.txt_1	131C	A0A0A6YXJ2_MOUSE|A0A0A6YXJ2	15.9211	KO_Uninfect_2	KO_Uninfect	NA	Model	NA	NA	Model	62050.1	908475	0.0683014
OBJ38812_TMT10.txt	1	OBJ38812_TMT10.txt_1	126C	A0A0A6YXJ2_MOUSE|A0A0A6YXJ2	16.3211	WT_Early_1	WT_Early	NA	Model	NA	NA	Model	81871.4	908475	0.0901196
OBJ38812_TMT10.txt	1	OBJ38812_TMT10.txt_1	129C	A0A0A6YXJ2_MOUSE|A0A0A6YXJ2	16.4036	WT_Early_2	WT_Early	NA	Model	NA	NA	Model	86693	908475	0.095427
OBJ38812_TMT10.txt	1	OBJ38812_TMT10.txt_1	127C	A0A0A6YXJ2_MOUSE|A0A0A6YXJ2	16.5251	WT_Late_1	WT_Late	NA	Model	NA	NA	Model	94305.4	908475	0.103806
OBJ38812_TMT10.txt	1	OBJ38812_TMT10.txt_1	130C	A0A0A6YXJ2_MOUSE|A0A0A6YXJ2	16.2967	WT_Late_2	WT_Late	NA	Model	NA	NA	Model	80498.6	908475	0.0886085
OBJ38812_TMT10.txt	1	OBJ38812_TMT10.txt_1	128C	A0A0A6YXJ2_MOUSE|A0A0A6YXJ2	16.4906	WT_Uninfect_1	WT_Uninfect	NA	Model	NA	NA	Model	92082	908475	0.101359
OBJ38812_TMT10_p2.txt	1	OBJ38812_TMT10_p2.txt_1	127N	A0A0A6YXL7_MOUSE|A0A0A6YXL7	17.6567	KO_Early_3	KO_Early	NA	Model	NA	NA	Model	206626	2.37416e+06	0.0870312
OBJ38812_TMT10_p2.txt	1	OBJ38812_TMT10_p2.txt_1	130N	A0A0A6YXL7_MOUSE|A0A0A6YXL7	17.5038	KO_Early_4	KO_Early	NA	Model	NA	NA	Model	185853	2.37416e+06	0.0782815
OBJ38812_TMT10_p2.txt	1	OBJ38812_TMT10_p2.txt_1	128N	A0A0A6YXL7_MOUSE|A0A0A6YXL7	17.4751	KO_Late_3	KO_Late	NA	Model	NA	NA	Model	182192	2.37416e+06	0.0767394
OBJ38812_TMT10_p2.txt	1	OBJ38812_TMT10_p2.txt_1	131N	A0A0A6YXL7_MOUSE|A0A0A6YXL7	17.5816	KO_Late_4	KO_Late	NA	Model	NA	NA	Model	196148	2.37416e+06	0.0826179
OBJ38812_TMT10_p2.txt	1	OBJ38812_TMT10_p2.txt_1	129N	A0A0A6YXL7_MOUSE|A0A0A6YXL7	17.7085	KO_Uninfect_3	KO_Uninfect	NA	Model	NA	NA	Model	214180	2.37416e+06	0.0902131
OBJ38812_TMT10_p2.txt	1	OBJ38812_TMT10_p2.txt_1	126C	A0A0A6YXL7_MOUSE|A0A0A6YXL7	17.5434	WT_Early_3	WT_Early	NA	Model	NA	NA	Model	191020	2.37416e+06	0.0804582
OBJ38812_TMT10_p2.txt	1	OBJ38812_TMT10_p2.txt_1	129C	A0A0A6YXL7_MOUSE|A0A0A6YXL7	17.6855	WT_Early_4	WT_Early	NA	Model	NA	NA	Model	210799	2.37416e+06	0.0887887
OBJ38812_TMT10_p2.txt	1	OBJ38812_TMT10_p2.txt_1	127C	A0A0A6YXL7_MOUSE|A0A0A6YXL7	17.6292	WT_Late_3	WT_Late	NA	Model	NA	NA	Model	202723	2.37416e+06	0.0853873
OBJ38812_TMT10_p2.txt	1	OBJ38812_TMT10_p2.txt_1	130C	A0A0A6YXL7_MOUSE|A0A0A6YXL7	17.8575	WT_Late_4	WT_Late	NA	Model	NA	NA	Model	237485	2.37416e+06	0.100029
OBJ38812_TMT10_p2.txt	1	OBJ38812_TMT10_p2.txt_1	128C	A0A0A6YXL7_MOUSE|A0A0A6YXL7	17.3593	WT_Uninfect_3	WT_Uninfect	NA	Model	NA	NA	Model	168143	2.37416e+06	0.0708223
OBJ38812_TMT10_p2.txt	1	OBJ38812_TMT10_p2.txt_1	131C	A0A0A6YXL7_MOUSE|A0A0A6YXL7	17.4602	WT_Uninfect_4	WT_Uninfect	NA	Model	NA	NA	Model	180317	2.37416e+06	0.0759496
OBJ38812_TMT10_p2.txt	1	OBJ38812_TMT10_p2.txt_1	127N	A0A0A6YXX3_MOUSE|A0A0A6YXX3	13.4915	KO_Early_3	KO_Early	NA	Model	NA	NA	Model	11516.8	177859	0.0647523
OBJ38812_TMT10_p2.txt	1	OBJ38812_TMT10_p2.txt_1	130N	A0A0A6YXX3_MOUSE|A0A0A6YXX3	13.9337	KO_Early_4	KO_Early	NA	Model	NA	NA	Model	15648.2	177859	0.0879808
OBJ38812_TMT10_p2.txt	1	OBJ38812_TMT10_p2.txt_1	128N	A0A0A6YXX3_MOUSE|A0A0A6YXX3	13.747	KO_Late_3	KO_Late	NA	Model	NA	NA	Model	13749	177859	0.077303
OBJ38812_TMT10_p2.txt	1	OBJ38812_TMT10_p2.txt_1	131N	A0A0A6YXX3_MOUSE|A0A0A6YXX3	13.8175	KO_Late_4	KO_Late	NA	Model	NA	NA	Model	14437.3	177859	0.0811724
OBJ38812_TMT10_p2.txt	1	OBJ38812_TMT10_p2.txt_1	129N	A0A0A6YXX3_MOUSE|A0A0A6YXX3	14.1622	KO_Uninfect_3	KO_Uninfect	NA	Model	NA	NA	Model	18333	177859	0.103076
OBJ38812_TMT10_p2.txt	1	OBJ38812_TMT10_p2.txt_1	126C	A0A0A6YXX3_MOUSE|A0A0A6YXX3	13.662	WT_Early_3	WT_Early	NA	Model	NA	NA	Model	12961.6	177859	0.0728757
OBJ38812_TMT10_p2.txt	1	OBJ38812_TMT10_p2.txt_1	129C	A0A0A6YXX3_MOUSE|A0A0A6YXX3	13.8116	WT_Early_4	WT_Early	NA	Model	NA	NA	Model	14378.7	177859	0.0808435
OBJ38812_TMT10_p2.txt	1	OBJ38812_TMT10_p2.txt_1	127C	A0A0A6YXX3_MOUSE|A0A0A6YXX3	13.7601	WT_Late_3	WT_Late	NA	Model	NA	NA	Model	13874.5	177859	0.0780083
OBJ38812_TMT10_p2.txt	1	OBJ38812_TMT10_p2.txt_1	130C	A0A0A6YXX3_MOUSE|A0A0A6YXX3	13.7809	WT_Late_4	WT_Late	NA	Model	NA	NA	Model	14076	177859	0.0791412
OBJ38812_TMT10_p2.txt	1	OBJ38812_TMT10_p2.txt_1	128C	A0A0A6YXX3_MOUSE|A0A0A6YXX3	14.2178	WT_Uninfect_3	WT_Uninfect	NA	Model	NA	NA	Model	19053.3	177859	0.107126
OBJ38812_TMT10_p2.txt	1	OBJ38812_TMT10_p2.txt_1	131C	A0A0A6YXX3_MOUSE|A0A0A6YXX3	13.8901	WT_Uninfect_4	WT_Uninfect	NA	Model	NA	NA	Model	15182.6	177859	0.0853629
OBJ38812_TMT10.txt	1	OBJ38812_TMT10.txt_1	127N	A0A0A6YXX3_MOUSE|A0A0A6YXX3	13.8611	KO_Early_1	KO_Early	NA	Model	NA	NA	Model	14880.2	178533	0.0833468
OBJ38812_TMT10.txt	1	OBJ38812_TMT10.txt_1	130N	A0A0A6YXX3_MOUSE|A0A0A6YXX3	13.9951	KO_Early_2	KO_Early	NA	Model	NA	NA	Model	16328.9	178533	0.0914616
OBJ38812_TMT10.txt	1	OBJ38812_TMT10.txt_1	128N	A0A0A6YXX3_MOUSE|A0A0A6YXX3	14.1853	KO_Late_1	KO_Late	NA	Model	NA	NA	Model	18629.9	178533	0.10435
OBJ38812_TMT10.txt	1	OBJ38812_TMT10.txt_1	131N	A0A0A6YXX3_MOUSE|A0A0A6YXX3	13.9306	KO_Late_2	KO_Late	NA	Model	NA	NA	Model	15614.4	178533	0.0874593
OBJ38812_TMT10.txt	1	OBJ38812_TMT10.txt_1	129N	A0A0A6YXX3_MOUSE|A0A0A6YXX3	14.3129	KO_Uninfect_1	KO_Uninfect	NA	Model	NA	NA	Model	20352.5	178533	0.113998
OBJ38812_TMT10.txt	1	OBJ38812_TMT10.txt_1	131C	A0A0A6YXX3_MOUSE|A0A0A6YXX3	13.873	KO_Uninfect_2	KO_Uninfect	NA	Model	NA	NA	Model	15003.7	178533	0.0840384
OBJ38812_TMT10.txt	1	OBJ38812_TMT10.txt_1	126C	A0A0A6YXX3_MOUSE|A0A0A6YXX3	13.7003	WT_Early_1	WT_Early	NA	Model	NA	NA	Model	13310.4	178533	0.074554
OBJ38812_TMT10.txt	1	OBJ38812_TMT10.txt_1	129C	A0A0A6YXX3_MOUSE|A0A0A6YXX3	13.649	WT_Early_2	WT_Early	NA	Model	NA	NA	Model	12846.1	178533	0.0719536
OBJ38812_TMT10.txt	1	OBJ38812_TMT10.txt_1	127C	A0A0A6YXX3_MOUSE|A0A0A6YXX3	13.6391	WT_Late_1	WT_Late	NA	Model	NA	NA	Model	12757.8	178533	0.071459
OBJ38812_TMT10.txt	1	OBJ38812_TMT10.txt_1	130C	A0A0A6YXX3_MOUSE|A0A0A6YXX3	13.4353	WT_Late_2	WT_Late	NA	Model	NA	NA	Model	11077.1	178533	0.0620448
OBJ38812_TMT10.txt	1	OBJ38812_TMT10.txt_1	128C	A0A0A6YXX3_MOUSE|A0A0A6YXX3	13.6755	WT_Uninfect_1	WT_Uninfect	NA	Model	NA	NA	Model	13084.2	178533	0.0732873
OBJ38812_TMT10_p2.txt	1	OBJ38812_TMT10_p2.txt_1	127N	A0A0F6M9M0_SHIFL|A0A0F6M9M0	17.0295	KO_Early_3	KO_Early	NA	Model	NA	NA	Model	133781	1.0818e+06	0.123666
OBJ38812_TMT10_p2.txt	1	OBJ38812_TMT10_p2.txt_1	130N	A0A0F6M9M0_SHIFL|A0A0F6M9M0	16.8181	KO_Early_4	KO_Early	NA	Model	NA	NA	Model	115545	1.0818e+06	0.106809
OBJ38812_TMT10_p2.txt	1	OBJ38812_TMT10_p2.txt_1	128N	A0A0F6M9M0_SHIFL|A0A0F6M9M0	17.4982	KO_Late_3	KO_Late	NA	Model	NA	NA	Model	185138	1.0818e+06	0.171139
OBJ38812_TMT10_p2.txt	1	OBJ38812_TMT10_p2.txt_1	131N	A0A0F6M9M0_SHIFL|A0A0F6M9M0	17.042	KO_Late_4	KO_Late	NA	Model	NA	NA	Model	134943	1.0818e+06	0.12474
OBJ38812_TMT10_p2.txt	1	OBJ38812_TMT10_p2.txt_1	129N	A0A0F6M9M0_SHIFL|A0A0F6M9M0	15.0407	KO_Uninfect_3	KO_Uninfect	NA	Model	NA	NA	Model	33706.6	1.0818e+06	0.031158
OBJ38812_TMT10_p2.txt	1	OBJ38812_TMT10_p2.txt_1	126C	A0A0F6M9M0_SHIFL|A0A0F6M9M0	15.8392	WT_Early_3	WT_Early	NA	Model	NA	NA	Model	58624.6	1.0818e+06	0.0541918
OBJ38812_TMT10_p2.txt	1	OBJ38812_TMT10_p2.txt_1	129C	A0A0F6M9M0_SHIFL|A0A0F6M9M0	15.864	WT_Early_4	WT_Early	NA	Model	NA	NA	Model	59640.1	1.0818e+06	0.0551305
OBJ38812_TMT10_p2.txt	1	OBJ38812_TMT10_p2.txt_1	127C	A0A0F6M9M0_SHIFL|A0A0F6M9M0	16.5885	WT_Late_3	WT_Late	NA	Model	NA	NA	Model	98543.1	1.0818e+06	0.091092
OBJ38812_TMT10_p2.txt	1	OBJ38812_TMT10_p2.txt_1	130C	A0A0F6M9M0_SHIFL|A0A0F6M9M0	16.618	WT_Late_4	WT_Late	NA	Model	NA	NA	Model	100582	1.0818e+06	0.092977
OBJ38812_TMT10_p2.txt	1	OBJ38812_TMT10_p2.txt_1	128C	A0A0F6M9M0_SHIFL|A0A0F6M9M0	15.1961	WT_Uninfect_3	WT_Uninfect	NA	Model	NA	NA	Model	37537.8	1.0818e+06	0.0346995
OBJ38812_TMT10_p2.txt	1	OBJ38812_TMT10_p2.txt_1	131C	A0A0F6M9M0_SHIFL|A0A0F6M9M0	15.2887	WT_Uninfect_4	WT_Uninfect	NA	Model	NA	NA	Model	40026.6	1.0818e+06	0.0370001
OBJ38812_TMT10_p2.txt	1	OBJ38812_TMT10_p2.txt_1	127N	A0A0F6MA18_SHIFL|A0A0F6MA18	13.8685	KO_Early_3	KO_Early	NA	Model	NA	NA	Model	14956.8	110586	0.135251
OBJ38812_TMT10_p2.txt	1	OBJ38812_TMT10_p2.txt_1	130N	A0A0F6MA18_SHIFL|A0A0F6MA18	13.1664	KO_Early_4	KO_Early	NA	Model	NA	NA	Model	9193.58	110586	0.0831355
OBJ38812_TMT10_p2.txt	1	OBJ38812_TMT10_p2.txt_1	128N	A0A0F6MA18_SHIFL|A0A0F6MA18	14.3608	KO_Late_3	KO_Late	NA	Model	NA	NA	Model	21038.8	110586	0.190249
OBJ38812_TMT10_p2.txt	1	OBJ38812_TMT10_p2.txt_1	131N	A0A0F6MA18_SHIFL|A0A0F6MA18	13.6217	KO_Late_4	KO_Late	NA	Model	NA	NA	Model	12604.9	110586	0.113983
OBJ38812_TMT10_p2.txt	1	OBJ38812_TMT10_p2.txt_1	129N	A0A0F6MA18_SHIFL|A0A0F6MA18	12.6284	KO_Uninfect_3	KO_Uninfect	NA	Model	NA	NA	Model	6331.7	110586	0.0572562
OBJ38812_TMT10_p2.txt	1	OBJ38812_TMT10_p2.txt_1	126C	A0A0F6MA18_SHIFL|A0A0F6MA18	12.3678	WT_Early_3	WT_Early	NA	Model	NA	NA	Model	5285.27	110586	0.0477935
OBJ38812_TMT10_p2.txt	1	OBJ38812_TMT10_p2.txt_1	129C	A0A0F6MA18_SHIFL|A0A0F6MA18	12.1253	WT_Early_4	WT_Early	NA	Model	NA	NA	Model	4467.65	110586	0.0404
OBJ38812_TMT10_p2.txt	1	OBJ38812_TMT10_p2.txt_1	127C	A0A0F6MA18_SHIFL|A0A0F6MA18	13.4494	WT_Late_3	WT_Late	NA	Model	NA	NA	Model	11186.2	110586	0.101155
OBJ38812_TMT10_p2.txt	1	OBJ38812_TMT10_p2.txt_1	130C	A0A0F6MA18_SHIFL|A0A0F6MA18	13.3437	WT_Late_4	WT_Late	NA	Model	NA	NA	Model	10396	110586	0.0940082
OBJ38812_TMT10_p2.txt	1	OBJ38812_TMT10_p2.txt_1	128C	A0A0F6MA18_SHIFL|A0A0F6MA18	11.7736	WT_Uninfect_3	WT_Uninfect	NA	Model	NA	NA	Model	3501.23	110586	0.0316608
OBJ38812_TMT10_p2.txt	1	OBJ38812_TMT10_p2.txt_1	131C	A0A0F6MA18_SHIFL|A0A0F6MA18	11.5607	WT_Uninfect_4	WT_Uninfect	NA	Model	NA	NA	Model	3020.76	110586	0.027316
OBJ38812_TMT10_p2.txt	1	OBJ38812_TMT10_p2.txt_1	127N	A0A0G2JDJ5_MOUSE|A0A0G2JDJ5	16.5238	KO_Early_3	KO_Early	NA	Model	NA	NA	Model	94221.3	1.34477e+06	0.0700649
OBJ38812_TMT10_p2.txt	1	OBJ38812_TMT10_p2.txt_1	130N	A0A0G2JDJ5_MOUSE|A0A0G2JDJ5	16.3787	KO_Early_4	KO_Early	NA	Model	NA	NA	Model	85209.8	1.34477e+06	0.0633638
OBJ38812_TMT10_p2.txt	1	OBJ38812_TMT10_p2.txt_1	128N	A0A0G2JDJ5_MOUSE|A0A0G2JDJ5	16.4948	KO_Late_3	KO_Late	NA	Model	NA	NA	Model	92351.3	1.34477e+06	0.0686743
OBJ38812_TMT10_p2.txt	1	OBJ38812_TMT10_p2.txt_1	131N	A0A0G2JDJ5_MOUSE|A0A0G2JDJ5	16.9528	KO_Late_4	KO_Late	NA	Model	NA	NA	Model	126850	1.34477e+06	0.094328
OBJ38812_TMT10_p2.txt	1	OBJ38812_TMT10_p2.txt_1	129N	A0A0G2JDJ5_MOUSE|A0A0G2JDJ5	16.9072	KO_Uninfect_3	KO_Uninfect	NA	Model	NA	NA	Model	122908	1.34477e+06	0.0913971
OBJ38812_TMT10_p2.txt	1	OBJ38812_TMT10_p2.txt_1	126C	A0A0G2JDJ5_MOUSE|A0A0G2JDJ5	17.0369	WT_Early_3	WT_Early	NA	Model	NA	NA	Model	134465	1.34477e+06	0.0999906
OBJ38812_TMT10_p2.txt	1	OBJ38812_TMT10_p2.txt_1	129C	A0A0G2JDJ5_MOUSE|A0A0G2JDJ5	16.8324	WT_Early_4	WT_Early	NA	Model	NA	NA	Model	116695	1.34477e+06	0.0867765
OBJ38812_TMT10_p2.txt	1	OBJ38812_TMT10_p2.txt_1	127C	A0A0G2JDJ5_MOUSE|A0A0G2JDJ5	17.0577	WT_Late_3	WT_Late	NA	Model	NA	NA	Model	136419	1.34477e+06	0.101444
OBJ38812_TMT10_p2.txt	1	OBJ38812_TMT10_p2.txt_1	130C	A0A0G2JDJ5_MOUSE|A0A0G2JDJ5	16.7651	WT_Late_4	WT_Late	NA	Model	NA	NA	Model	111374	1.34477e+06	0.0828202
OBJ38812_TMT10_p2.txt	1	OBJ38812_TMT10_p2.txt_1	128C	A0A0G2JDJ5_MOUSE|A0A0G2JDJ5	17.1862	WT_Uninfect_3	WT_Uninfect	NA	Model	NA	NA	Model	149124	1.34477e+06	0.110892
OBJ38812_TMT10_p2.txt	1	OBJ38812_TMT10_p2.txt_1	131C	A0A0G2JDJ5_MOUSE|A0A0G2JDJ5	15.872	WT_Uninfect_4	WT_Uninfect	NA	Model	NA	NA	Model	59973.2	1.34477e+06	0.0445973
OBJ38812_TMT10.txt	1	OBJ38812_TMT10.txt_1	127N	A0A0G2JDJ5_MOUSE|A0A0G2JDJ5	16.9762	KO_Early_1	KO_Early	NA	Model	NA	NA	Model	128930	1.37293e+06	0.0939081
OBJ38812_TMT10.txt	1	OBJ38812_TMT10.txt_1	130N	A0A0G2JDJ5_MOUSE|A0A0G2JDJ5	16.8586	KO_Early_2	KO_Early	NA	Model	NA	NA	Model	118836	1.37293e+06	0.0865564
OBJ38812_TMT10.txt	1	OBJ38812_TMT10.txt_1	128N	A0A0G2JDJ5_MOUSE|A0A0G2JDJ5	16.5054	KO_Late_1	KO_Late	NA	Model	NA	NA	Model	93028	1.37293e+06	0.0677586
OBJ38812_TMT10.txt	1	OBJ38812_TMT10.txt_1	131N	A0A0G2JDJ5_MOUSE|A0A0G2JDJ5	16.7353	KO_Late_2	KO_Late	NA	Model	NA	NA	Model	109104	1.37293e+06	0.0794676
OBJ38812_TMT10.txt	1	OBJ38812_TMT10.txt_1	129N	A0A0G2JDJ5_MOUSE|A0A0G2JDJ5	16.6721	KO_Uninfect_1	KO_Uninfect	NA	Model	NA	NA	Model	104425	1.37293e+06	0.0760601
OBJ38812_TMT10.txt	1	OBJ38812_TMT10.txt_1	131C	A0A0G2JDJ5_MOUSE|A0A0G2JDJ5	16.558	KO_Uninfect_2	KO_Uninfect	NA	Model	NA	NA	Model	96486.3	1.37293e+06	0.0702775
OBJ38812_TMT10.txt	1	OBJ38812_TMT10.txt_1	126C	A0A0G2JDJ5_MOUSE|A0A0G2JDJ5	16.9713	WT_Early_1	WT_Early	NA	Model	NA	NA	Model	128494	1.37293e+06	0.0935907
OBJ38812_TMT10.txt	1	OBJ38812_TMT10.txt_1	129C	A0A0G2JDJ5_MOUSE|A0A0G2JDJ5	16.92	WT_Early_2	WT_Early	NA	Model	NA	NA	Model	124001	1.37293e+06	0.0903182
OBJ38812_TMT10.txt	1	OBJ38812_TMT10.txt_1	127C	A0A0G2JDJ5_MOUSE|A0A0G2JDJ5	17.0811	WT_Late_1	WT_Late	NA	Model	NA	NA	Model	138652	1.37293e+06	0.10099
OBJ38812_TMT10.txt	1	OBJ38812_TMT10.txt_1	130C	A0A0G2JDJ5_MOUSE|A0A0G2JDJ5	16.5243	WT_Late_2	WT_Late	NA	Model	NA	NA	Model	94257.3	1.37293e+06	0.068654
OBJ38812_TMT10.txt	1	OBJ38812_TMT10.txt_1	128C	A0A0G2JDJ5_MOUSE|A0A0G2JDJ5	16.8911	WT_Uninfect_1	WT_Uninfect	NA	Model	NA	NA	Model	121538	1.37293e+06	0.0885247
OBJ38812_TMT10_p2.txt	1	OBJ38812_TMT10_p2.txt_1	127N	A0A0G2JDV2_MOUSE|A0A0G2JDV2	14.6744	KO_Early_3	KO_Early	NA	Model	NA	NA	Model	26148.5	349643	0.0747862
OBJ38812_TMT10_p2.txt	1	OBJ38812_TMT10_p2.txt_1	130N	A0A0G2JDV2_MOUSE|A0A0G2JDV2	14.7032	KO_Early_4	KO_Early	NA	Model	NA	NA	Model	26675.2	349643	0.0762925
OBJ38812_TMT10_p2.txt	1	OBJ38812_TMT10_p2.txt_1	128N	A0A0G2JDV2_MOUSE|A0A0G2JDV2	15.0989	KO_Late_3	KO_Late	NA	Model	NA	NA	Model	35092.1	349643	0.100365
OBJ38812_TMT10_p2.txt	1	OBJ38812_TMT10_p2.txt_1	131N	A0A0G2JDV2_MOUSE|A0A0G2JDV2	14.8365	KO_Late_4	KO_Late	NA	Model	NA	NA	Model	29257.2	349643	0.0836773
OBJ38812_TMT10_p2.txt	1	OBJ38812_TMT10_p2.txt_1	129N	A0A0G2JDV2_MOUSE|A0A0G2JDV2	14.7183	KO_Uninfect_3	KO_Uninfect	NA	Model	NA	NA	Model	26955.8	349643	0.0770952
OBJ38812_TMT10_p2.txt	1	OBJ38812_TMT10_p2.txt_1	126C	A0A0G2JDV2_MOUSE|A0A0G2JDV2	14.7566	WT_Early_3	WT_Early	NA	Model	NA	NA	Model	27681.3	349643	0.0791703
OBJ38812_TMT10_p2.txt	1	OBJ38812_TMT10_p2.txt_1	129C	A0A0G2JDV2_MOUSE|A0A0G2JDV2	14.6853	WT_Early_4	WT_Early	NA	Model	NA	NA	Model	26346.5	349643	0.0753526
OBJ38812_TMT10_p2.txt	1	OBJ38812_TMT10_p2.txt_1	127C	A0A0G2JDV2_MOUSE|A0A0G2JDV2	14.888	WT_Late_3	WT_Late	NA	Model	NA	NA	Model	30320.3	349643	0.0867178
OBJ38812_TMT10_p2.txt	1	OBJ38812_TMT10_p2.txt_1	130C	A0A0G2JDV2_MOUSE|A0A0G2JDV2	14.8577	WT_Late_4	WT_Late	NA	Model	NA	NA	Model	29689.4	349643	0.0849133
OBJ38812_TMT10_p2.txt	1	OBJ38812_TMT10_p2.txt_1	128C	A0A0G2JDV2_MOUSE|A0A0G2JDV2	14.8159	WT_Uninfect_3	WT_Uninfect	NA	Model	NA	NA	Model	28842.8	349643	0.0824921
OBJ38812_TMT10_p2.txt	1	OBJ38812_TMT10_p2.txt_1	131C	A0A0G2JDV2_MOUSE|A0A0G2JDV2	15.0549	WT_Uninfect_4	WT_Uninfect	NA	Model	NA	NA	Model	34038.9	349643	0.0973533
OBJ38812_TMT10_p2.txt	1	OBJ38812_TMT10_p2.txt_1	127N	A0A0G2JDZ4_MOUSE|A0A0G2JDZ4	14.3519	KO_Early_3	KO_Early	NA	Model	NA	NA	Model	20910.2	262900	0.0795366
OBJ38812_TMT10_p2.txt	1	OBJ38812_TMT10_p2.txt_1	130N	A0A0G2JDZ4_MOUSE|A0A0G2JDZ4	14.9302	KO_Early_4	KO_Early	NA	Model	NA	NA	Model	31220	262900	0.118752
OBJ38812_TMT10_p2.txt	1	OBJ38812_TMT10_p2.txt_1	128N	A0A0G2JDZ4_MOUSE|A0A0G2JDZ4	14.5177	KO_Late_3	KO_Late	NA	Model	NA	NA	Model	23456.4	262900	0.0892216
OBJ38812_TMT10_p2.txt	1	OBJ38812_TMT10_p2.txt_1	131N	A0A0G2JDZ4_MOUSE|A0A0G2JDZ4	14.8295	KO_Late_4	KO_Late	NA	Model	NA	NA	Model	29116.3	262900	0.11075
OBJ38812_TMT10_p2.txt	1	OBJ38812_TMT10_p2.txt_1	129N	A0A0G2JDZ4_MOUSE|A0A0G2JDZ4	15.5677	KO_Uninfect_3	KO_Uninfect	NA	Model	NA	NA	Model	48566.4	262900	0.184733
OBJ38812_TMT10_p2.txt	1	OBJ38812_TMT10_p2.txt_1	126C	A0A0G2JDZ4_MOUSE|A0A0G2JDZ4	13.0395	WT_Early_3	WT_Early	NA	Model	NA	NA	Model	8419.61	262900	0.0320258
OBJ38812_TMT10_p2.txt	1	OBJ38812_TMT10_p2.txt_1	129C	A0A0G2JDZ4_MOUSE|A0A0G2JDZ4	13.2036	WT_Early_4	WT_Early	NA	Model	NA	NA	Model	9433.72	262900	0.0358833
OBJ38812_TMT10_p2.txt	1	OBJ38812_TMT10_p2.txt_1	127C	A0A0G2JDZ4_MOUSE|A0A0G2JDZ4	13.391	WT_Late_3	WT_Late	NA	Model	NA	NA	Model	10741.9	262900	0.0408593
OBJ38812_TMT10_p2.txt	1	OBJ38812_TMT10_p2.txt_1	130C	A0A0G2JDZ4_MOUSE|A0A0G2JDZ4	12.9659	WT_Late_4	WT_Late	NA	Model	NA	NA	Model	8000.49	262900	0.0304316
OBJ38812_TMT10_p2.txt	1	OBJ38812_TMT10_p2.txt_1	128C	A0A0G2JDZ4_MOUSE|A0A0G2JDZ4	14.3393	WT_Uninfect_3	WT_Uninfect	NA	Model	NA	NA	Model	20727.4	262900	0.0788414
OBJ38812_TMT10_p2.txt	1	OBJ38812_TMT10_p2.txt_1	131C	A0A0G2JDZ4_MOUSE|A0A0G2JDZ4	15.0777	WT_Uninfect_4	WT_Uninfect	NA	Model	NA	NA	Model	34581.4	262900	0.131538
OBJ38812_TMT10_p2.txt	1	OBJ38812_TMT10_p2.txt_1	127N	A0A0G2JFP4_MOUSE|A0A0G2JFP4	15.6808	KO_Early_3	KO_Early	NA	Model	NA	NA	Model	52527.7	808104	0.0650012
OBJ38812_TMT10_p2.txt	1	OBJ38812_TMT10_p2.txt_1	130N	A0A0G2JFP4_MOUSE|A0A0G2JFP4	16.0258	KO_Early_4	KO_Early	NA	Model	NA	NA	Model	66720.3	808104	0.0825639
OBJ38812_TMT10_p2.txt	1	OBJ38812_TMT10_p2.txt_1	128N	A0A0G2JFP4_MOUSE|A0A0G2JFP4	15.8907	KO_Late_3	KO_Late	NA	Model	NA	NA	Model	60756.3	808104	0.0751837
OBJ38812_TMT10_p2.txt	1	OBJ38812_TMT10_p2.txt_1	131N	A0A0G2JFP4_MOUSE|A0A0G2JFP4	15.9347	KO_Late_4	KO_Late	NA	Model	NA	NA	Model	62634.9	808104	0.0775084
OBJ38812_TMT10_p2.txt	1	OBJ38812_TMT10_p2.txt_1	129N	A0A0G2JFP4_MOUSE|A0A0G2JFP4	16.0077	KO_Uninfect_3	KO_Uninfect	NA	Model	NA	NA	Model	65885.4	808104	0.0815308
OBJ38812_TMT10_p2.txt	1	OBJ38812_TMT10_p2.txt_1	126C	A0A0G2JFP4_MOUSE|A0A0G2JFP4	16.2105	WT_Early_3	WT_Early	NA	Model	NA	NA	Model	75833.4	808104	0.0938411
OBJ38812_TMT10_p2.txt	1	OBJ38812_TMT10_p2.txt_1	129C	A0A0G2JFP4_MOUSE|A0A0G2JFP4	15.6652	WT_Early_4	WT_Early	NA	Model	NA	NA	Model	51963.3	808104	0.0643027
OBJ38812_TMT10_p2.txt	1	OBJ38812_TMT10_p2.txt_1	127C	A0A0G2JFP4_MOUSE|A0A0G2JFP4	16.0584	WT_Late_3	WT_Late	NA	Model	NA	NA	Model	68241.8	808104	0.0844468
OBJ38812_TMT10_p2.txt	1	OBJ38812_TMT10_p2.txt_1	130C	A0A0G2JFP4_MOUSE|A0A0G2JFP4	16.0172	WT_Late_4	WT_Late	NA	Model	NA	NA	Model	66321.2	808104	0.0820701
OBJ38812_TMT10_p2.txt	1	OBJ38812_TMT10_p2.txt_1	128C	A0A0G2JFP4_MOUSE|A0A0G2JFP4	16.5671	WT_Uninfect_3	WT_Uninfect	NA	Model	NA	NA	Model	97097.2	808104	0.120154
OBJ38812_TMT10_p2.txt	1	OBJ38812_TMT10_p2.txt_1	131C	A0A0G2JFP4_MOUSE|A0A0G2JFP4	16.1815	WT_Uninfect_4	WT_Uninfect	NA	Model	NA	NA	Model	74322.1	808104	0.091971
OBJ38812_TMT10.txt	1	OBJ38812_TMT10.txt_1	127N	A0A0G2JFP4_MOUSE|A0A0G2JFP4	16.2353	KO_Early_1	KO_Early	NA	Model	NA	NA	Model	77146.6	801405	0.0962642
OBJ38812_TMT10.txt	1	OBJ38812_TMT10.txt_1	130N	A0A0G2JFP4_MOUSE|A0A0G2JFP4	15.9347	KO_Early_2	KO_Early	NA	Model	NA	NA	Model	62636	801405	0.0781577
OBJ38812_TMT10.txt	1	OBJ38812_TMT10.txt_1	128N	A0A0G2JFP4_MOUSE|A0A0G2JFP4	15.9375	KO_Late_1	KO_Late	NA	Model	NA	NA	Model	62759.3	801405	0.0783116
OBJ38812_TMT10.txt	1	OBJ38812_TMT10.txt_1	131N	A0A0G2JFP4_MOUSE|A0A0G2JFP4	16.0569	KO_Late_2	KO_Late	NA	Model	NA	NA	Model	68174.3	801405	0.0850685
OBJ38812_TMT10.txt	1	OBJ38812_TMT10.txt_1	129N	A0A0G2JFP4_MOUSE|A0A0G2JFP4	16.2489	KO_Uninfect_1	KO_Uninfect	NA	Model	NA	NA	Model	77879	801405	0.0971781
OBJ38812_TMT10.txt	1	OBJ38812_TMT10.txt_1	131C	A0A0G2JFP4_MOUSE|A0A0G2JFP4	16.1375	KO_Uninfect_2	KO_Uninfect	NA	Model	NA	NA	Model	72091.7	801405	0.0899566
OBJ38812_TMT10.txt	1	OBJ38812_TMT10.txt_1	126C	A0A0G2JFP4_MOUSE|A0A0G2JFP4	16.0584	WT_Early_1	WT_Early	NA	Model	NA	NA	Model	68241.1	801405	0.0851518
OBJ38812_TMT10.txt	1	OBJ38812_TMT10.txt_1	129C	A0A0G2JFP4_MOUSE|A0A0G2JFP4	15.9982	WT_Early_2	WT_Early	NA	Model	NA	NA	Model	65453.9	801405	0.0816739
OBJ38812_TMT10.txt	1	OBJ38812_TMT10.txt_1	127C	A0A0G2JFP4_MOUSE|A0A0G2JFP4	15.8377	WT_Late_1	WT_Late	NA	Model	NA	NA	Model	58561.6	801405	0.0730737
OBJ38812_TMT10.txt	1	OBJ38812_TMT10.txt_1	130C	A0A0G2JFP4_MOUSE|A0A0G2JFP4	15.5847	WT_Late_2	WT_Late	NA	Model	NA	NA	Model	49142.9	801405	0.0613209
OBJ38812_TMT10.txt	1	OBJ38812_TMT10.txt_1	128C	A0A0G2JFP4_MOUSE|A0A0G2JFP4	16.1658	WT_Uninfect_1	WT_Uninfect	NA	Model	NA	NA	Model	73517.9	801405	0.0917362
OBJ38812_TMT10_p2.txt	1	OBJ38812_TMT10_p2.txt_1	127N	A0A0G2JFZ4_MOUSE|A0A0G2JFZ4	14.2862	KO_Early_3	KO_Early	NA	Model	NA	NA	Model	19978.5	222117	0.0899455
OBJ38812_TMT10_p2.txt	1	OBJ38812_TMT10_p2.txt_1	130N	A0A0G2JFZ4_MOUSE|A0A0G2JFZ4	14.2251	KO_Early_4	KO_Early	NA	Model	NA	NA	Model	19150.3	222117	0.086217
OBJ38812_TMT10_p2.txt	1	OBJ38812_TMT10_p2.txt_1	128N	A0A0G2JFZ4_MOUSE|A0A0G2JFZ4	14.5878	KO_Late_3	KO_Late	NA	Model	NA	NA	Model	24623.9	222117	0.11086
OBJ38812_TMT10_p2.txt	1	OBJ38812_TMT10_p2.txt_1	131N	A0A0G2JFZ4_MOUSE|A0A0G2JFZ4	14.3214	KO_Late_4	KO_Late	NA	Model	NA	NA	Model	20473.1	222117	0.0921725
OBJ38812_TMT10_p2.txt	1	OBJ38812_TMT10_p2.txt_1	129N	A0A0G2JFZ4_MOUSE|A0A0G2JFZ4	14.3165	KO_Uninfect_3	KO_Uninfect	NA	Model	NA	NA	Model	20402.6	222117	0.091855
OBJ38812_TMT10_p2.txt	1	OBJ38812_TMT10_p2.txt_1	126C	A0A0G2JFZ4_MOUSE|A0A0G2JFZ4	14.0355	WT_Early_3	WT_Early	NA	Model	NA	NA	Model	16792	222117	0.0755997
OBJ38812_TMT10_p2.txt	1	OBJ38812_TMT10_p2.txt_1	129C	A0A0G2JFZ4_MOUSE|A0A0G2JFZ4	13.9936	WT_Early_4	WT_Early	NA	Model	NA	NA	Model	16311.6	222117	0.0734368
OBJ38812_TMT10_p2.txt	1	OBJ38812_TMT10_p2.txt_1	127C	A0A0G2JFZ4_MOUSE|A0A0G2JFZ4	14.0487	WT_Late_3	WT_Late	NA	Model	NA	NA	Model	16946.3	222117	0.0762945
OBJ38812_TMT10_p2.txt	1	OBJ38812_TMT10_p2.txt_1	130C	A0A0G2JFZ4_MOUSE|A0A0G2JFZ4	13.8953	WT_Late_4	WT_Late	NA	Model	NA	NA	Model	15236.6	222117	0.068597
OBJ38812_TMT10_p2.txt	1	OBJ38812_TMT10_p2.txt_1	128C	A0A0G2JFZ4_MOUSE|A0A0G2JFZ4	14.0106	WT_Uninfect_3	WT_Uninfect	NA	Model	NA	NA	Model	16505.1	222117	0.0743081
OBJ38812_TMT10_p2.txt	1	OBJ38812_TMT10_p2.txt_1	131C	A0A0G2JFZ4_MOUSE|A0A0G2JFZ4	14.0733	WT_Uninfect_4	WT_Uninfect	NA	Model	NA	NA	Model	17238.1	222117	0.0776081
OBJ38812_TMT10.txt	1	OBJ38812_TMT10.txt_1	127N	A0A0G2JFZ4_MOUSE|A0A0G2JFZ4	14.0774	KO_Early_1	KO_Early	NA	Model	NA	NA	Model	17287	219592	0.0787234
OBJ38812_TMT10.txt	1	OBJ38812_TMT10.txt_1	130N	A0A0G2JFZ4_MOUSE|A0A0G2JFZ4	14.2438	KO_Early_2	KO_Early	NA	Model	NA	NA	Model	19399.8	219592	0.0883446
OBJ38812_TMT10.txt	1	OBJ38812_TMT10.txt_1	128N	A0A0G2JFZ4_MOUSE|A0A0G2JFZ4	14.0003	KO_Late_1	KO_Late	NA	Model	NA	NA	Model	16387.2	219592	0.0746255
OBJ38812_TMT10.txt	1	OBJ38812_TMT10.txt_1	131N	A0A0G2JFZ4_MOUSE|A0A0G2JFZ4	14.3704	KO_Late_2	KO_Late	NA	Model	NA	NA	Model	21179.2	219592	0.0964479
OBJ38812_TMT10.txt	1	OBJ38812_TMT10.txt_1	129N	A0A0G2JFZ4_MOUSE|A0A0G2JFZ4	14.0927	KO_Uninfect_1	KO_Uninfect	NA	Model	NA	NA	Model	17471.7	219592	0.0795643
OBJ38812_TMT10.txt	1	OBJ38812_TMT10.txt_1	131C	A0A0G2JFZ4_MOUSE|A0A0G2JFZ4	13.9473	KO_Uninfect_2	KO_Uninfect	NA	Model	NA	NA	Model	15796.4	219592	0.0719354
OBJ38812_TMT10.txt	1	OBJ38812_TMT10.txt_1	126C	A0A0G2JFZ4_MOUSE|A0A0G2JFZ4	14.2061	WT_Early_1	WT_Early	NA	Model	NA	NA	Model	18899.8	219592	0.0860678
OBJ38812_TMT10.txt	1	OBJ38812_TMT10.txt_1	129C	A0A0G2JFZ4_MOUSE|A0A0G2JFZ4	14.277	WT_Early_2	WT_Early	NA	Model	NA	NA	Model	19852.2	219592	0.0904051
OBJ38812_TMT10.txt	1	OBJ38812_TMT10.txt_1	127C	A0A0G2JFZ4_MOUSE|A0A0G2JFZ4	14.3567	WT_Late_1	WT_Late	NA	Model	NA	NA	Model	20980	219592	0.0955408
OBJ38812_TMT10.txt	1	OBJ38812_TMT10.txt_1	130C	A0A0G2JFZ4_MOUSE|A0A0G2JFZ4	14.0535	WT_Late_2	WT_Late	NA	Model	NA	NA	Model	17002.9	219592	0.0774296
OBJ38812_TMT10.txt	1	OBJ38812_TMT10.txt_1	128C	A0A0G2JFZ4_MOUSE|A0A0G2JFZ4	14.0427	WT_Uninfect_1	WT_Uninfect	NA	Model	NA	NA	Model	16876.5	219592	0.076854
OBJ38812_TMT10_p2.txt	1	OBJ38812_TMT10_p2.txt_1	127N	A0A0G2JGT1_MOUSE|A0A0G2JGT1	15.6855	KO_Early_3	KO_Early	NA	Model	NA	NA	Model	52698	402270	0.131002
OBJ38812_TMT10_p2.txt	1	OBJ38812_TMT10_p2.txt_1	130N	A0A0G2JGT1_MOUSE|A0A0G2JGT1	15.1497	KO_Early_4	KO_Early	NA	Model	NA	NA	Model	36351.7	402270	0.0903666
OBJ38812_TMT10_p2.txt	1	OBJ38812_TMT10_p2.txt_1	128N	A0A0G2JGT1_MOUSE|A0A0G2JGT1	15.1863	KO_Late_3	KO_Late	NA	Model	NA	NA	Model	37285.3	402270	0.0926874
OBJ38812_TMT10_p2.txt	1	OBJ38812_TMT10_p2.txt_1	131N	A0A0G2JGT1_MOUSE|A0A0G2JGT1	15.0241	KO_Late_4	KO_Late	NA	Model	NA	NA	Model	33319.1	402270	0.0828277
OBJ38812_TMT10_p2.txt	1	OBJ38812_TMT10_p2.txt_1	129N	A0A0G2JGT1_MOUSE|A0A0G2JGT1	15.61	KO_Uninfect_3	KO_Uninfect	NA	Model	NA	NA	Model	50011.7	402270	0.124324
OBJ38812_TMT10_p2.txt	1	OBJ38812_TMT10_p2.txt_1	126C	A0A0G2JGT1_MOUSE|A0A0G2JGT1	14.6158	WT_Early_3	WT_Early	NA	Model	NA	NA	Model	25106.4	402270	0.062412
OBJ38812_TMT10_p2.txt	1	OBJ38812_TMT10_p2.txt_1	129C	A0A0G2JGT1_MOUSE|A0A0G2JGT1	14.5609	WT_Early_4	WT_Early	NA	Model	NA	NA	Model	24169.9	402270	0.0600838
OBJ38812_TMT10_p2.txt	1	OBJ38812_TMT10_p2.txt_1	127C	A0A0G2JGT1_MOUSE|A0A0G2JGT1	14.5763	WT_Late_3	WT_Late	NA	Model	NA	NA	Model	24428.9	402270	0.0607278
OBJ38812_TMT10_p2.txt	1	OBJ38812_TMT10_p2.txt_1	130C	A0A0G2JGT1_MOUSE|A0A0G2JGT1	14.4671	WT_Late_4	WT_Late	NA	Model	NA	NA	Model	22648.6	402270	0.0563021
OBJ38812_TMT10_p2.txt	1	OBJ38812_TMT10_p2.txt_1	128C	A0A0G2JGT1_MOUSE|A0A0G2JGT1	14.7804	WT_Uninfect_3	WT_Uninfect	NA	Model	NA	NA	Model	28142.2	402270	0.0699586
OBJ38812_TMT10_p2.txt	1	OBJ38812_TMT10_p2.txt_1	131C	A0A0G2JGT1_MOUSE|A0A0G2JGT1	15.1402	WT_Uninfect_4	WT_Uninfect	NA	Model	NA	NA	Model	36111.4	402270	0.0897691
OBJ38812_TMT10_p2.txt	1	OBJ38812_TMT10_p2.txt_1	127N	A0A0G2JGY6_MOUSE|A0A0G2JGY6	13.7369	KO_Early_3	KO_Early	NA	Model	NA	NA	Model	13652.8	149976	0.0910338
OBJ38812_TMT10_p2.txt	1	OBJ38812_TMT10_p2.txt_1	130N	A0A0G2JGY6_MOUSE|A0A0G2JGY6	13.2326	KO_Early_4	KO_Early	NA	Model	NA	NA	Model	9625.35	149976	0.0641795
OBJ38812_TMT10_p2.txt	1	OBJ38812_TMT10_p2.txt_1	128N	A0A0G2JGY6_MOUSE|A0A0G2JGY6	13.7287	KO_Late_3	KO_Late	NA	Model	NA	NA	Model	13575.4	149976	0.0905176
OBJ38812_TMT10_p2.txt	1	OBJ38812_TMT10_p2.txt_1	131N	A0A0G2JGY6_MOUSE|A0A0G2JGY6	13.6974	KO_Late_4	KO_Late	NA	Model	NA	NA	Model	13284.3	149976	0.0885764
OBJ38812_TMT10_p2.txt	1	OBJ38812_TMT10_p2.txt_1	129N	A0A0G2JGY6_MOUSE|A0A0G2JGY6	13.6307	KO_Uninfect_3	KO_Uninfect	NA	Model	NA	NA	Model	12684	149976	0.0845736
OBJ38812_TMT10_p2.txt	1	OBJ38812_TMT10_p2.txt_1	126C	A0A0G2JGY6_MOUSE|A0A0G2JGY6	14.0101	WT_Early_3	WT_Early	NA	Model	NA	NA	Model	16499	149976	0.110011
OBJ38812_TMT10_p2.txt	1	OBJ38812_TMT10_p2.txt_1	129C	A0A0G2JGY6_MOUSE|A0A0G2JGY6	13.568	WT_Early_4	WT_Early	NA	Model	NA	NA	Model	12144.5	149976	0.0809763
OBJ38812_TMT10_p2.txt	1	OBJ38812_TMT10_p2.txt_1	127C	A0A0G2JGY6_MOUSE|A0A0G2JGY6	13.673	WT_Late_3	WT_Late	NA	Model	NA	NA	Model	13061.2	149976	0.0870887
OBJ38812_TMT10_p2.txt	1	OBJ38812_TMT10_p2.txt_1	130C	A0A0G2JGY6_MOUSE|A0A0G2JGY6	13.3833	WT_Late_4	WT_Late	NA	Model	NA	NA	Model	10685.3	149976	0.0712468
OBJ38812_TMT10_p2.txt	1	OBJ38812_TMT10_p2.txt_1	128C	A0A0G2JGY6_MOUSE|A0A0G2JGY6	13.7855	WT_Uninfect_3	WT_Uninfect	NA	Model	NA	NA	Model	14120.8	149976	0.0941538
OBJ38812_TMT10_p2.txt	1	OBJ38812_TMT10_p2.txt_1	131C	A0A0G2JGY6_MOUSE|A0A0G2JGY6	12.9359	WT_Uninfect_4	WT_Uninfect	NA	Model	NA	NA	Model	7836.04	149976	0.0522488
OBJ38812_TMT10.txt	1	OBJ38812_TMT10.txt_1	127N	A0A0G2JGY6_MOUSE|A0A0G2JGY6	13.6876	KO_Early_1	KO_Early	NA	Model	NA	NA	Model	13193.9	155346	0.0849326
OBJ38812_TMT10.txt	1	OBJ38812_TMT10.txt_1	130N	A0A0G2JGY6_MOUSE|A0A0G2JGY6	13.2885	KO_Early_2	KO_Early	NA	Model	NA	NA	Model	10005.7	155346	0.0644091
OBJ38812_TMT10.txt	1	OBJ38812_TMT10.txt_1	128N	A0A0G2JGY6_MOUSE|A0A0G2JGY6	13.8095	KO_Late_1	KO_Late	NA	Model	NA	NA	Model	14357.6	155346	0.0924239
OBJ38812_TMT10.txt	1	OBJ38812_TMT10.txt_1	131N	A0A0G2JGY6_MOUSE|A0A0G2JGY6	13.6814	KO_Late_2	KO_Late	NA	Model	NA	NA	Model	13137.2	155346	0.0845674
OBJ38812_TMT10.txt	1	OBJ38812_TMT10.txt_1	129N	A0A0G2JGY6_MOUSE|A0A0G2JGY6	13.7804	KO_Uninfect_1	KO_Uninfect	NA	Model	NA	NA	Model	14070.2	155346	0.0905735
OBJ38812_TMT10.txt	1	OBJ38812_TMT10.txt_1	131C	A0A0G2JGY6_MOUSE|A0A0G2JGY6	13.7419	KO_Uninfect_2	KO_Uninfect	NA	Model	NA	NA	Model	13700.5	155346	0.0881936
OBJ38812_TMT10.txt	1	OBJ38812_TMT10.txt_1	126C	A0A0G2JGY6_MOUSE|A0A0G2JGY6	13.8434	WT_Early_1	WT_Early	NA	Model	NA	NA	Model	14698.9	155346	0.0946206
OBJ38812_TMT10.txt	1	OBJ38812_TMT10.txt_1	129C	A0A0G2JGY6_MOUSE|A0A0G2JGY6	13.6657	WT_Early_2	WT_Early	NA	Model	NA	NA	Model	12994.8	155346	0.0836513
OBJ38812_TMT10.txt	1	OBJ38812_TMT10.txt_1	127C	A0A0G2JGY6_MOUSE|A0A0G2JGY6	13.5555	WT_Late_1	WT_Late	NA	Model	NA	NA	Model	12040	155346	0.0775044
OBJ38812_TMT10.txt	1	OBJ38812_TMT10.txt_1	130C	A0A0G2JGY6_MOUSE|A0A0G2JGY6	13.4619	WT_Late_2	WT_Late	NA	Model	NA	NA	Model	11283.3	155346	0.0726338
OBJ38812_TMT10.txt	1	OBJ38812_TMT10.txt_1	128C	A0A0G2JGY6_MOUSE|A0A0G2JGY6	13.6725	WT_Uninfect_1	WT_Uninfect	NA	Model	NA	NA	Model	13056.5	155346	0.0840482
OBJ38812_TMT10_p2.txt	1	OBJ38812_TMT10_p2.txt_1	127N	A0A0H2UZ41_SHIFL|A0A0H2UZ41	16.7726	KO_Early_3	KO_Early	NA	Model	NA	NA	Model	111955	665643	0.168191
OBJ38812_TMT10_p2.txt	1	OBJ38812_TMT10_p2.txt_1	130N	A0A0H2UZ41_SHIFL|A0A0H2UZ41	15.7663	KO_Early_4	KO_Early	NA	Model	NA	NA	Model	55734.4	665643	0.0837301
OBJ38812_TMT10_p2.txt	1	OBJ38812_TMT10_p2.txt_1	128N	A0A0H2UZ41_SHIFL|A0A0H2UZ41	17.3357	KO_Late_3	KO_Late	NA	Model	NA	NA	Model	165416	665643	0.248505
OBJ38812_TMT10_p2.txt	1	OBJ38812_TMT10_p2.txt_1	131N	A0A0H2UZ41_SHIFL|A0A0H2UZ41	16.5378	KO_Late_4	KO_Late	NA	Model	NA	NA	Model	95139.3	665643	0.142928
OBJ38812_TMT10_p2.txt	1	OBJ38812_TMT10_p2.txt_1	129N	A0A0H2UZ41_SHIFL|A0A0H2UZ41	11.9577	KO_Uninfect_3	KO_Uninfect	NA	Model	NA	NA	Model	3977.71	665643	0.00597574
OBJ38812_TMT10_p2.txt	1	OBJ38812_TMT10_p2.txt_1	126C	A0A0H2UZ41_SHIFL|A0A0H2UZ41	14.9466	WT_Early_3	WT_Early	NA	Model	NA	NA	Model	31577.9	665643	0.0474397
OBJ38812_TMT10_p2.txt	1	OBJ38812_TMT10_p2.txt_1	129C	A0A0H2UZ41_SHIFL|A0A0H2UZ41	14.25	WT_Early_4	WT_Early	NA	Model	NA	NA	Model	19484.2	665643	0.0292713
OBJ38812_TMT10_p2.txt	1	OBJ38812_TMT10_p2.txt_1	127C	A0A0H2UZ41_SHIFL|A0A0H2UZ41	16.4012	WT_Late_3	WT_Late	NA	Model	NA	NA	Model	86547.1	665643	0.13002
OBJ38812_TMT10_p2.txt	1	OBJ38812_TMT10_p2.txt_1	130C	A0A0H2UZ41_SHIFL|A0A0H2UZ41	15.6829	WT_Late_4	WT_Late	NA	Model	NA	NA	Model	52603	665643	0.0790258
OBJ38812_TMT10_p2.txt	1	OBJ38812_TMT10_p2.txt_1	128C	A0A0H2UZ41_SHIFL|A0A0H2UZ41	11.8375	WT_Uninfect_3	WT_Uninfect	NA	Model	NA	NA	Model	3659.62	665643	0.00549786
OBJ38812_TMT10_p2.txt	1	OBJ38812_TMT10_p2.txt_1	131C	A0A0H2UZ41_SHIFL|A0A0H2UZ41	11.653	WT_Uninfect_4	WT_Uninfect	NA	Model	NA	NA	Model	3220.44	665643	0.00483808
OBJ38812_TMT10.txt	1	OBJ38812_TMT10.txt_1	127N	A0A0H2UZ41_SHIFL|A0A0H2UZ41	15.6592	KO_Early_1	KO_Early	NA	Model	NA	NA	Model	51747.3	580928	0.0890768
OBJ38812_TMT10.txt	1	OBJ38812_TMT10.txt_1	130N	A0A0H2UZ41_SHIFL|A0A0H2UZ41	16.4871	KO_Early_2	KO_Early	NA	Model	NA	NA	Model	91856.8	580928	0.158121
OBJ38812_TMT10.txt	1	OBJ38812_TMT10.txt_1	128N	A0A0H2UZ41_SHIFL|A0A0H2UZ41	16.2657	KO_Late_1	KO_Late	NA	Model	NA	NA	Model	78788.7	580928	0.135625
OBJ38812_TMT10.txt	1	OBJ38812_TMT10.txt_1	131N	A0A0H2UZ41_SHIFL|A0A0H2UZ41	17.0936	KO_Late_2	KO_Late	NA	Model	NA	NA	Model	139856	580928	0.240746
OBJ38812_TMT10.txt	1	OBJ38812_TMT10.txt_1	129N	A0A0H2UZ41_SHIFL|A0A0H2UZ41	12.6378	KO_Uninfect_1	KO_Uninfect	NA	Model	NA	NA	Model	6373.09	580928	0.0109705
OBJ38812_TMT10.txt	1	OBJ38812_TMT10.txt_1	131C	A0A0H2UZ41_SHIFL|A0A0H2UZ41	12.8962	KO_Uninfect_2	KO_Uninfect	NA	Model	NA	NA	Model	7623.41	580928	0.0131228
OBJ38812_TMT10.txt	1	OBJ38812_TMT10.txt_1	126C	A0A0H2UZ41_SHIFL|A0A0H2UZ41	14.8266	WT_Early_1	WT_Early	NA	Model	NA	NA	Model	29057.9	580928	0.0500198
OBJ38812_TMT10.txt	1	OBJ38812_TMT10.txt_1	129C	A0A0H2UZ41_SHIFL|A0A0H2UZ41	14.4446	WT_Early_2	WT_Early	NA	Model	NA	NA	Model	22296.9	580928	0.0383815
OBJ38812_TMT10.txt	1	OBJ38812_TMT10.txt_1	127C	A0A0H2UZ41_SHIFL|A0A0H2UZ41	15.7116	WT_Late_1	WT_Late	NA	Model	NA	NA	Model	53660.1	580928	0.0923695
OBJ38812_TMT10.txt	1	OBJ38812_TMT10.txt_1	130C	A0A0H2UZ41_SHIFL|A0A0H2UZ41	15.8068	WT_Late_2	WT_Late	NA	Model	NA	NA	Model	57320.3	580928	0.0986702
OBJ38812_TMT10.txt	1	OBJ38812_TMT10.txt_1	128C	A0A0H2UZ41_SHIFL|A0A0H2UZ41	12.5554	WT_Uninfect_1	WT_Uninfect	NA	Model	NA	NA	Model	6019.23	580928	0.0103614
OBJ38812_TMT10_p2.txt	1	OBJ38812_TMT10_p2.txt_1	127N	A0A0J9YTR2_MOUSE|A0A0J9YTR2	15.2243	KO_Early_3	KO_Early	NA	Model	NA	NA	Model	38281.1	538269	0.0711188
OBJ38812_TMT10_p2.txt	1	OBJ38812_TMT10_p2.txt_1	130N	A0A0J9YTR2_MOUSE|A0A0J9YTR2	15.9202	KO_Early_4	KO_Early	NA	Model	NA	NA	Model	62007.5	538269	0.115198
OBJ38812_TMT10_p2.txt	1	OBJ38812_TMT10_p2.txt_1	128N	A0A0J9YTR2_MOUSE|A0A0J9YTR2	15.2931	KO_Late_3	KO_Late	NA	Model	NA	NA	Model	40150.9	538269	0.0745926
OBJ38812_TMT10_p2.txt	1	OBJ38812_TMT10_p2.txt_1	131N	A0A0J9YTR2_MOUSE|A0A0J9YTR2	15.036	KO_Late_4	KO_Late	NA	Model	NA	NA	Model	33596.7	538269	0.0624162
OBJ38812_TMT10_p2.txt	1	OBJ38812_TMT10_p2.txt_1	129N	A0A0J9YTR2_MOUSE|A0A0J9YTR2	15.3953	KO_Uninfect_3	KO_Uninfect	NA	Model	NA	NA	Model	43095.9	538269	0.0800639
OBJ38812_TMT10_p2.txt	1	OBJ38812_TMT10_p2.txt_1	126C	A0A0J9YTR2_MOUSE|A0A0J9YTR2	15.1087	WT_Early_3	WT_Early	NA	Model	NA	NA	Model	35332.6	538269	0.0656412
OBJ38812_TMT10_p2.txt	1	OBJ38812_TMT10_p2.txt_1	129C	A0A0J9YTR2_MOUSE|A0A0J9YTR2	15.2879	WT_Early_4	WT_Early	NA	Model	NA	NA	Model	40004.7	538269	0.0743209
OBJ38812_TMT10_p2.txt	1	OBJ38812_TMT10_p2.txt_1	127C	A0A0J9YTR2_MOUSE|A0A0J9YTR2	14.7628	WT_Late_3	WT_Late	NA	Model	NA	NA	Model	27800.3	538269	0.0516476
OBJ38812_TMT10_p2.txt	1	OBJ38812_TMT10_p2.txt_1	130C	A0A0J9YTR2_MOUSE|A0A0J9YTR2	15.1972	WT_Late_4	WT_Late	NA	Model	NA	NA	Model	37566.7	538269	0.0697916
OBJ38812_TMT10_p2.txt	1	OBJ38812_TMT10_p2.txt_1	128C	A0A0J9YTR2_MOUSE|A0A0J9YTR2	15.8154	WT_Uninfect_3	WT_Uninfect	NA	Model	NA	NA	Model	57666	538269	0.107132
OBJ38812_TMT10_p2.txt	1	OBJ38812_TMT10_p2.txt_1	131C	A0A0J9YTR2_MOUSE|A0A0J9YTR2	16.3288	WT_Uninfect_4	WT_Uninfect	NA	Model	NA	NA	Model	82310.1	538269	0.152916
OBJ38812_TMT10.txt	1	OBJ38812_TMT10.txt_1	127N	A0A0J9YTR2_MOUSE|A0A0J9YTR2	15.3934	KO_Early_1	KO_Early	NA	Model	NA	NA	Model	43039.4	499001	0.0862512
OBJ38812_TMT10.txt	1	OBJ38812_TMT10.txt_1	130N	A0A0J9YTR2_MOUSE|A0A0J9YTR2	15.0019	KO_Early_2	KO_Early	NA	Model	NA	NA	Model	32810.7	499001	0.0657527
OBJ38812_TMT10.txt	1	OBJ38812_TMT10.txt_1	128N	A0A0J9YTR2_MOUSE|A0A0J9YTR2	15.5482	KO_Late_1	KO_Late	NA	Model	NA	NA	Model	47916.1	499001	0.096024
OBJ38812_TMT10.txt	1	OBJ38812_TMT10.txt_1	131N	A0A0J9YTR2_MOUSE|A0A0J9YTR2	15.2947	KO_Late_2	KO_Late	NA	Model	NA	NA	Model	40195	499001	0.0805508
OBJ38812_TMT10.txt	1	OBJ38812_TMT10.txt_1	129N	A0A0J9YTR2_MOUSE|A0A0J9YTR2	15.597	KO_Uninfect_1	KO_Uninfect	NA	Model	NA	NA	Model	49565.4	499001	0.0993292
OBJ38812_TMT10.txt	1	OBJ38812_TMT10.txt_1	131C	A0A0J9YTR2_MOUSE|A0A0J9YTR2	15.5608	KO_Uninfect_2	KO_Uninfect	NA	Model	NA	NA	Model	48335.8	499001	0.0968651
OBJ38812_TMT10.txt	1	OBJ38812_TMT10.txt_1	126C	A0A0J9YTR2_MOUSE|A0A0J9YTR2	15.0231	WT_Early_1	WT_Early	NA	Model	NA	NA	Model	33296	499001	0.0667252
OBJ38812_TMT10.txt	1	OBJ38812_TMT10.txt_1	129C	A0A0J9YTR2_MOUSE|A0A0J9YTR2	14.9725	WT_Early_2	WT_Early	NA	Model	NA	NA	Model	32148.4	499001	0.0644254
OBJ38812_TMT10.txt	1	OBJ38812_TMT10.txt_1	127C	A0A0J9YTR2_MOUSE|A0A0J9YTR2	15.2016	WT_Late_1	WT_Late	NA	Model	NA	NA	Model	37681.2	499001	0.0755132
OBJ38812_TMT10.txt	1	OBJ38812_TMT10.txt_1	130C	A0A0J9YTR2_MOUSE|A0A0J9YTR2	15.3409	WT_Late_2	WT_Late	NA	Model	NA	NA	Model	41503	499001	0.0831721
OBJ38812_TMT10.txt	1	OBJ38812_TMT10.txt_1	128C	A0A0J9YTR2_MOUSE|A0A0J9YTR2	15.6677	WT_Uninfect_1	WT_Uninfect	NA	Model	NA	NA	Model	52053.5	499001	0.104315
OBJ38812_TMT10_p2.txt	1	OBJ38812_TMT10_p2.txt_1	127N	A0A0J9YU76_MOUSE|A0A0J9YU76	15.5741	KO_Early_3	KO_Early	NA	Model	NA	NA	Model	48784	598283	0.08154
OBJ38812_TMT10_p2.txt	1	OBJ38812_TMT10_p2.txt_1	130N	A0A0J9YU76_MOUSE|A0A0J9YU76	15.5876	KO_Early_4	KO_Early	NA	Model	NA	NA	Model	49242.3	598283	0.082306
OBJ38812_TMT10_p2.txt	1	OBJ38812_TMT10_p2.txt_1	128N	A0A0J9YU76_MOUSE|A0A0J9YU76	15.5235	KO_Late_3	KO_Late	NA	Model	NA	NA	Model	47102.9	598283	0.0787302
OBJ38812_TMT10_p2.txt	1	OBJ38812_TMT10_p2.txt_1	131N	A0A0J9YU76_MOUSE|A0A0J9YU76	15.5972	KO_Late_4	KO_Late	NA	Model	NA	NA	Model	49571.6	598283	0.0828565
OBJ38812_TMT10_p2.txt	1	OBJ38812_TMT10_p2.txt_1	129N	A0A0J9YU76_MOUSE|A0A0J9YU76	15.8259	KO_Uninfect_3	KO_Uninfect	NA	Model	NA	NA	Model	58085	598283	0.0970862
OBJ38812_TMT10_p2.txt	1	OBJ38812_TMT10_p2.txt_1	126C	A0A0J9YU76_MOUSE|A0A0J9YU76	15.4734	WT_Early_3	WT_Early	NA	Model	NA	NA	Model	45494.1	598283	0.0760412
OBJ38812_TMT10_p2.txt	1	OBJ38812_TMT10_p2.txt_1	129C	A0A0J9YU76_MOUSE|A0A0J9YU76	15.7517	WT_Early_4	WT_Early	NA	Model	NA	NA	Model	55175	598283	0.0922222
OBJ38812_TMT10_p2.txt	1	OBJ38812_TMT10_p2.txt_1	127C	A0A0J9YU76_MOUSE|A0A0J9YU76	15.6554	WT_Late_3	WT_Late	NA	Model	NA	NA	Model	51610	598283	0.0862636
OBJ38812_TMT10_p2.txt	1	OBJ38812_TMT10_p2.txt_1	130C	A0A0J9YU76_MOUSE|A0A0J9YU76	15.4352	WT_Late_4	WT_Late	NA	Model	NA	NA	Model	44305.2	598283	0.0740539
OBJ38812_TMT10_p2.txt	1	OBJ38812_TMT10_p2.txt_1	128C	A0A0J9YU76_MOUSE|A0A0J9YU76	15.451	WT_Uninfect_3	WT_Uninfect	NA	Model	NA	NA	Model	44794.3	598283	0.0748715
OBJ38812_TMT10_p2.txt	1	OBJ38812_TMT10_p2.txt_1	131C	A0A0J9YU76_MOUSE|A0A0J9YU76	15.744	WT_Uninfect_4	WT_Uninfect	NA	Model	NA	NA	Model	54879.6	598283	0.0917285
OBJ38812_TMT10_p2.txt	1	OBJ38812_TMT10_p2.txt_1	127N	A0A0J9YUS1_MOUSE|A0A0J9YUS1	14.3994	KO_Early_3	KO_Early	NA	Model	NA	NA	Model	21609.3	311853	0.069293
OBJ38812_TMT10_p2.txt	1	OBJ38812_TMT10_p2.txt_1	130N	A0A0J9YUS1_MOUSE|A0A0J9YUS1	14.5954	KO_Early_4	KO_Early	NA	Model	NA	NA	Model	24754.5	311853	0.0793787
OBJ38812_TMT10_p2.txt	1	OBJ38812_TMT10_p2.txt_1	128N	A0A0J9YUS1_MOUSE|A0A0J9YUS1	14.3984	KO_Late_3	KO_Late	NA	Model	NA	NA	Model	21595.4	311853	0.0692484
OBJ38812_TMT10_p2.txt	1	OBJ38812_TMT10_p2.txt_1	131N	A0A0J9YUS1_MOUSE|A0A0J9YUS1	14.5134	KO_Late_4	KO_Late	NA	Model	NA	NA	Model	23386.7	311853	0.0749928
OBJ38812_TMT10_p2.txt	1	OBJ38812_TMT10_p2.txt_1	129N	A0A0J9YUS1_MOUSE|A0A0J9YUS1	14.6376	KO_Uninfect_3	KO_Uninfect	NA	Model	NA	NA	Model	25490	311853	0.081737
OBJ38812_TMT10_p2.txt	1	OBJ38812_TMT10_p2.txt_1	126C	A0A0J9YUS1_MOUSE|A0A0J9YUS1	14.716	WT_Early_3	WT_Early	NA	Model	NA	NA	Model	26913.5	311853	0.0863019
OBJ38812_TMT10_p2.txt	1	OBJ38812_TMT10_p2.txt_1	129C	A0A0J9YUS1_MOUSE|A0A0J9YUS1	14.592	WT_Early_4	WT_Early	NA	Model	NA	NA	Model	24696.1	311853	0.0791915
OBJ38812_TMT10_p2.txt	1	OBJ38812_TMT10_p2.txt_1	127C	A0A0J9YUS1_MOUSE|A0A0J9YUS1	14.5988	WT_Late_3	WT_Late	NA	Model	NA	NA	Model	24813.4	311853	0.0795677
OBJ38812_TMT10_p2.txt	1	OBJ38812_TMT10_p2.txt_1	130C	A0A0J9YUS1_MOUSE|A0A0J9YUS1	14.7004	WT_Late_4	WT_Late	NA	Model	NA	NA	Model	26622.5	311853	0.0853687
OBJ38812_TMT10_p2.txt	1	OBJ38812_TMT10_p2.txt_1	128C	A0A0J9YUS1_MOUSE|A0A0J9YUS1	14.9676	WT_Uninfect_3	WT_Uninfect	NA	Model	NA	NA	Model	32039.8	311853	0.10274
OBJ38812_TMT10_p2.txt	1	OBJ38812_TMT10_p2.txt_1	131C	A0A0J9YUS1_MOUSE|A0A0J9YUS1	15.0906	WT_Uninfect_4	WT_Uninfect	NA	Model	NA	NA	Model	34892.8	311853	0.111888
OBJ38812_TMT10.txt	1	OBJ38812_TMT10.txt_1	127N	A0A0J9YUS1_MOUSE|A0A0J9YUS1	14.6373	KO_Early_1	KO_Early	NA	Model	NA	NA	Model	25483.8	301910	0.0844086
OBJ38812_TMT10.txt	1	OBJ38812_TMT10.txt_1	130N	A0A0J9YUS1_MOUSE|A0A0J9YUS1	14.1939	KO_Early_2	KO_Early	NA	Model	NA	NA	Model	18740.8	301910	0.0620742
OBJ38812_TMT10.txt	1	OBJ38812_TMT10.txt_1	128N	A0A0J9YUS1_MOUSE|A0A0J9YUS1	14.7424	KO_Late_1	KO_Late	NA	Model	NA	NA	Model	27409.3	301910	0.0907865
OBJ38812_TMT10.txt	1	OBJ38812_TMT10.txt_1	131N	A0A0J9YUS1_MOUSE|A0A0J9YUS1	14.7989	KO_Late_2	KO_Late	NA	Model	NA	NA	Model	28504.7	301910	0.0944145
OBJ38812_TMT10.txt	1	OBJ38812_TMT10.txt_1	129N	A0A0J9YUS1_MOUSE|A0A0J9YUS1	14.6207	KO_Uninfect_1	KO_Uninfect	NA	Model	NA	NA	Model	25191.8	301910	0.0834415
OBJ38812_TMT10.txt	1	OBJ38812_TMT10.txt_1	131C	A0A0J9YUS1_MOUSE|A0A0J9YUS1	14.6019	KO_Uninfect_2	KO_Uninfect	NA	Model	NA	NA	Model	24866	301910	0.0823622
OBJ38812_TMT10.txt	1	OBJ38812_TMT10.txt_1	126C	A0A0J9YUS1_MOUSE|A0A0J9YUS1	14.6547	WT_Early_1	WT_Early	NA	Model	NA	NA	Model	25794	301910	0.0854361
OBJ38812_TMT10.txt	1	OBJ38812_TMT10.txt_1	129C	A0A0J9YUS1_MOUSE|A0A0J9YUS1	14.4936	WT_Early_2	WT_Early	NA	Model	NA	NA	Model	23067.7	301910	0.0764061
OBJ38812_TMT10.txt	1	OBJ38812_TMT10.txt_1	127C	A0A0J9YUS1_MOUSE|A0A0J9YUS1	14.8011	WT_Late_1	WT_Late	NA	Model	NA	NA	Model	28547.4	301910	0.0945562
OBJ38812_TMT10.txt	1	OBJ38812_TMT10.txt_1	130C	A0A0J9YUS1_MOUSE|A0A0J9YUS1	14.5803	WT_Late_2	WT_Late	NA	Model	NA	NA	Model	24496	301910	0.0811369
OBJ38812_TMT10.txt	1	OBJ38812_TMT10.txt_1	128C	A0A0J9YUS1_MOUSE|A0A0J9YUS1	14.5962	WT_Uninfect_1	WT_Uninfect	NA	Model	NA	NA	Model	24768.9	301910	0.0820408
OBJ38812_TMT10_p2.txt	1	OBJ38812_TMT10_p2.txt_1	127N	A0A0N4SUI7_MOUSE|A0A0N4SUI7	14.2044	KO_Early_3	KO_Early	NA	Model	NA	NA	Model	18877.4	179179	0.105355
OBJ38812_TMT10_p2.txt	1	OBJ38812_TMT10_p2.txt_1	130N	A0A0N4SUI7_MOUSE|A0A0N4SUI7	14.081	KO_Early_4	KO_Early	NA	Model	NA	NA	Model	17330.5	179179	0.0967221
OBJ38812_TMT10_p2.txt	1	OBJ38812_TMT10_p2.txt_1	128N	A0A0N4SUI7_MOUSE|A0A0N4SUI7	14.2919	KO_Late_3	KO_Late	NA	Model	NA	NA	Model	20057.7	179179	0.111942
OBJ38812_TMT10_p2.txt	1	OBJ38812_TMT10_p2.txt_1	131N	A0A0N4SUI7_MOUSE|A0A0N4SUI7	14.075	KO_Late_4	KO_Late	NA	Model	NA	NA	Model	17258.2	179179	0.0963185
OBJ38812_TMT10_p2.txt	1	OBJ38812_TMT10_p2.txt_1	129N	A0A0N4SUI7_MOUSE|A0A0N4SUI7	13.8094	KO_Uninfect_3	KO_Uninfect	NA	Model	NA	NA	Model	14356.5	179179	0.0801243
OBJ38812_TMT10_p2.txt	1	OBJ38812_TMT10_p2.txt_1	126C	A0A0N4SUI7_MOUSE|A0A0N4SUI7	13.7445	WT_Early_3	WT_Early	NA	Model	NA	NA	Model	13725.2	179179	0.0766006
OBJ38812_TMT10_p2.txt	1	OBJ38812_TMT10_p2.txt_1	129C	A0A0N4SUI7_MOUSE|A0A0N4SUI7	13.6531	WT_Early_4	WT_Early	NA	Model	NA	NA	Model	12881.9	179179	0.0718942
OBJ38812_TMT10_p2.txt	1	OBJ38812_TMT10_p2.txt_1	127C	A0A0N4SUI7_MOUSE|A0A0N4SUI7	13.4386	WT_Late_3	WT_Late	NA	Model	NA	NA	Model	11102.7	179179	0.0619643
OBJ38812_TMT10_p2.txt	1	OBJ38812_TMT10_p2.txt_1	130C	A0A0N4SUI7_MOUSE|A0A0N4SUI7	13.6421	WT_Late_4	WT_Late	NA	Model	NA	NA	Model	12784.8	179179	0.0713523
OBJ38812_TMT10_p2.txt	1	OBJ38812_TMT10_p2.txt_1	128C	A0A0N4SUI7_MOUSE|A0A0N4SUI7	13.4475	WT_Uninfect_3	WT_Uninfect	NA	Model	NA	NA	Model	11171.1	179179	0.0623463
OBJ38812_TMT10_p2.txt	1	OBJ38812_TMT10_p2.txt_1	131C	A0A0N4SUI7_MOUSE|A0A0N4SUI7	13.8709	WT_Uninfect_4	WT_Uninfect	NA	Model	NA	NA	Model	14981.1	179179	0.08361
OBJ38812_TMT10.txt	1	OBJ38812_TMT10.txt_1	127N	A0A0N4SUI7_MOUSE|A0A0N4SUI7	14.2097	KO_Early_1	KO_Early	NA	Model	NA	NA	Model	18946.7	181247	0.104535
OBJ38812_TMT10.txt	1	OBJ38812_TMT10.txt_1	130N	A0A0N4SUI7_MOUSE|A0A0N4SUI7	13.9031	KO_Early_2	KO_Early	NA	Model	NA	NA	Model	15319.5	181247	0.084523
OBJ38812_TMT10.txt	1	OBJ38812_TMT10.txt_1	128N	A0A0N4SUI7_MOUSE|A0A0N4SUI7	14.1517	KO_Late_1	KO_Late	NA	Model	NA	NA	Model	18200.3	181247	0.100417
OBJ38812_TMT10.txt	1	OBJ38812_TMT10.txt_1	131N	A0A0N4SUI7_MOUSE|A0A0N4SUI7	13.9219	KO_Late_2	KO_Late	NA	Model	NA	NA	Model	15520.8	181247	0.0856335
OBJ38812_TMT10.txt	1	OBJ38812_TMT10.txt_1	129N	A0A0N4SUI7_MOUSE|A0A0N4SUI7	13.9223	KO_Uninfect_1	KO_Uninfect	NA	Model	NA	NA	Model	15525	181247	0.0856566
OBJ38812_TMT10.txt	1	OBJ38812_TMT10.txt_1	131C	A0A0N4SUI7_MOUSE|A0A0N4SUI7	14.1236	KO_Uninfect_2	KO_Uninfect	NA	Model	NA	NA	Model	17849.8	181247	0.0984834
OBJ38812_TMT10.txt	1	OBJ38812_TMT10.txt_1	126C	A0A0N4SUI7_MOUSE|A0A0N4SUI7	13.6001	WT_Early_1	WT_Early	NA	Model	NA	NA	Model	12417.5	181247	0.0685116
OBJ38812_TMT10.txt	1	OBJ38812_TMT10.txt_1	129C	A0A0N4SUI7_MOUSE|A0A0N4SUI7	13.9419	WT_Early_2	WT_Early	NA	Model	NA	NA	Model	15737.1	181247	0.0868271
OBJ38812_TMT10.txt	1	OBJ38812_TMT10.txt_1	127C	A0A0N4SUI7_MOUSE|A0A0N4SUI7	13.5093	WT_Late_1	WT_Late	NA	Model	NA	NA	Model	11660	181247	0.0643324
OBJ38812_TMT10.txt	1	OBJ38812_TMT10.txt_1	130C	A0A0N4SUI7_MOUSE|A0A0N4SUI7	13.3743	WT_Late_2	WT_Late	NA	Model	NA	NA	Model	10618.9	181247	0.0585879
OBJ38812_TMT10.txt	1	OBJ38812_TMT10.txt_1	128C	A0A0N4SUI7_MOUSE|A0A0N4SUI7	13.8533	WT_Uninfect_1	WT_Uninfect	NA	Model	NA	NA	Model	14799.7	181247	0.0816551
OBJ38812_TMT10_p2.txt	1	OBJ38812_TMT10_p2.txt_1	127N	A0A0N4SVH4_MOUSE|A0A0N4SVH4	17.4689	KO_Early_3	KO_Early	NA	Model	NA	NA	Model	181407	2.08034e+06	0.0872006
OBJ38812_TMT10_p2.txt	1	OBJ38812_TMT10_p2.txt_1	130N	A0A0N4SVH4_MOUSE|A0A0N4SVH4	17.584	KO_Early_4	KO_Early	NA	Model	NA	NA	Model	196472	2.08034e+06	0.0944421
OBJ38812_TMT10_p2.txt	1	OBJ38812_TMT10_p2.txt_1	128N	A0A0N4SVH4_MOUSE|A0A0N4SVH4	17.5541	KO_Late_3	KO_Late	NA	Model	NA	NA	Model	192450	2.08034e+06	0.0925087
OBJ38812_TMT10_p2.txt	1	OBJ38812_TMT10_p2.txt_1	131N	A0A0N4SVH4_MOUSE|A0A0N4SVH4	17.6519	KO_Late_4	KO_Late	NA	Model	NA	NA	Model	205942	2.08034e+06	0.0989943
OBJ38812_TMT10_p2.txt	1	OBJ38812_TMT10_p2.txt_1	129N	A0A0N4SVH4_MOUSE|A0A0N4SVH4	18.2125	KO_Uninfect_3	KO_Uninfect	NA	Model	NA	NA	Model	303747	2.08034e+06	0.146008
OBJ38812_TMT10_p2.txt	1	OBJ38812_TMT10_p2.txt_1	126C	A0A0N4SVH4_MOUSE|A0A0N4SVH4	16.4826	WT_Early_3	WT_Early	NA	Model	NA	NA	Model	91568.1	2.08034e+06	0.0440159
OBJ38812_TMT10_p2.txt	1	OBJ38812_TMT10_p2.txt_1	129C	A0A0N4SVH4_MOUSE|A0A0N4SVH4	16.6098	WT_Early_4	WT_Early	NA	Model	NA	NA	Model	100010	2.08034e+06	0.0480739
OBJ38812_TMT10_p2.txt	1	OBJ38812_TMT10_p2.txt_1	127C	A0A0N4SVH4_MOUSE|A0A0N4SVH4	16.9249	WT_Late_3	WT_Late	NA	Model	NA	NA	Model	124422	2.08034e+06	0.0598087
OBJ38812_TMT10_p2.txt	1	OBJ38812_TMT10_p2.txt_1	130C	A0A0N4SVH4_MOUSE|A0A0N4SVH4	16.6346	WT_Late_4	WT_Late	NA	Model	NA	NA	Model	101743	2.08034e+06	0.048907
OBJ38812_TMT10_p2.txt	1	OBJ38812_TMT10_p2.txt_1	128C	A0A0N4SVH4_MOUSE|A0A0N4SVH4	18.0744	WT_Uninfect_3	WT_Uninfect	NA	Model	NA	NA	Model	276020	2.08034e+06	0.13268
OBJ38812_TMT10_p2.txt	1	OBJ38812_TMT10_p2.txt_1	131C	A0A0N4SVH4_MOUSE|A0A0N4SVH4	17.1253	WT_Uninfect_4	WT_Uninfect	NA	Model	NA	NA	Model	142966	2.08034e+06	0.0687226
OBJ38812_TMT10_p2.txt	1	OBJ38812_TMT10_p2.txt_1	127N	A0A0N4SW73_MOUSE|A0A0N4SW73	14.3118	KO_Early_3	KO_Early	NA	Model	NA	NA	Model	20336.6	195499	0.104024
OBJ38812_TMT10_p2.txt	1	OBJ38812_TMT10_p2.txt_1	130N	A0A0N4SW73_MOUSE|A0A0N4SW73	14.0443	KO_Early_4	KO_Early	NA	Model	NA	NA	Model	16894.6	195499	0.0864182
OBJ38812_TMT10_p2.txt	1	OBJ38812_TMT10_p2.txt_1	128N	A0A0N4SW73_MOUSE|A0A0N4SW73	14.2268	KO_Late_3	KO_Late	NA	Model	NA	NA	Model	19173.2	195499	0.0980732
OBJ38812_TMT10_p2.txt	1	OBJ38812_TMT10_p2.txt_1	131N	A0A0N4SW73_MOUSE|A0A0N4SW73	14.1724	KO_Late_4	KO_Late	NA	Model	NA	NA	Model	18464.2	195499	0.0944466
OBJ38812_TMT10_p2.txt	1	OBJ38812_TMT10_p2.txt_1	129N	A0A0N4SW73_MOUSE|A0A0N4SW73	14.1473	KO_Uninfect_3	KO_Uninfect	NA	Model	NA	NA	Model	18145.3	195499	0.0928154
OBJ38812_TMT10_p2.txt	1	OBJ38812_TMT10_p2.txt_1	126C	A0A0N4SW73_MOUSE|A0A0N4SW73	13.5643	WT_Early_3	WT_Early	NA	Model	NA	NA	Model	12112.9	195499	0.0619588
OBJ38812_TMT10_p2.txt	1	OBJ38812_TMT10_p2.txt_1	129C	A0A0N4SW73_MOUSE|A0A0N4SW73	13.8955	WT_Early_4	WT_Early	NA	Model	NA	NA	Model	15238.9	195499	0.0779489
OBJ38812_TMT10_p2.txt	1	OBJ38812_TMT10_p2.txt_1	127C	A0A0N4SW73_MOUSE|A0A0N4SW73	13.8755	WT_Late_3	WT_Late	NA	Model	NA	NA	Model	15029.3	195499	0.0768766
OBJ38812_TMT10_p2.txt	1	OBJ38812_TMT10_p2.txt_1	130C	A0A0N4SW73_MOUSE|A0A0N4SW73	13.8526	WT_Late_4	WT_Late	NA	Model	NA	NA	Model	14792.5	195499	0.0756654
OBJ38812_TMT10_p2.txt	1	OBJ38812_TMT10_p2.txt_1	128C	A0A0N4SW73_MOUSE|A0A0N4SW73	13.3666	WT_Uninfect_3	WT_Uninfect	NA	Model	NA	NA	Model	10562	195499	0.0540258
OBJ38812_TMT10_p2.txt	1	OBJ38812_TMT10_p2.txt_1	131C	A0A0N4SW73_MOUSE|A0A0N4SW73	14.2115	WT_Uninfect_4	WT_Uninfect	NA	Model	NA	NA	Model	18970.5	195499	0.0970365
OBJ38812_TMT10.txt	1	OBJ38812_TMT10.txt_1	127N	A0A0N4SW73_MOUSE|A0A0N4SW73	13.9177	KO_Early_1	KO_Early	NA	Model	NA	NA	Model	15475.1	192579	0.0803572
OBJ38812_TMT10.txt	1	OBJ38812_TMT10.txt_1	130N	A0A0N4SW73_MOUSE|A0A0N4SW73	13.938	KO_Early_2	KO_Early	NA	Model	NA	NA	Model	15694.6	192579	0.0814967
OBJ38812_TMT10.txt	1	OBJ38812_TMT10.txt_1	128N	A0A0N4SW73_MOUSE|A0A0N4SW73	13.73	KO_Late_1	KO_Late	NA	Model	NA	NA	Model	13587.5	192579	0.0705556
OBJ38812_TMT10.txt	1	OBJ38812_TMT10.txt_1	131N	A0A0N4SW73_MOUSE|A0A0N4SW73	13.9786	KO_Late_2	KO_Late	NA	Model	NA	NA	Model	16142.2	192579	0.0838211
OBJ38812_TMT10.txt	1	OBJ38812_TMT10.txt_1	129N	A0A0N4SW73_MOUSE|A0A0N4SW73	13.8509	KO_Uninfect_1	KO_Uninfect	NA	Model	NA	NA	Model	14775.8	192579	0.0767257
OBJ38812_TMT10.txt	1	OBJ38812_TMT10.txt_1	131C	A0A0N4SW73_MOUSE|A0A0N4SW73	14.0987	KO_Uninfect_2	KO_Uninfect	NA	Model	NA	NA	Model	17544.5	192579	0.0911028
OBJ38812_TMT10.txt	1	OBJ38812_TMT10.txt_1	126C	A0A0N4SW73_MOUSE|A0A0N4SW73	13.6406	WT_Early_1	WT_Early	NA	Model	NA	NA	Model	12771.5	192579	0.0663181
OBJ38812_TMT10.txt	1	OBJ38812_TMT10.txt_1	129C	A0A0N4SW73_MOUSE|A0A0N4SW73	14.1834	WT_Early_2	WT_Early	NA	Model	NA	NA	Model	18605.3	192579	0.0966112
OBJ38812_TMT10.txt	1	OBJ38812_TMT10.txt_1	127C	A0A0N4SW73_MOUSE|A0A0N4SW73	13.7932	WT_Late_1	WT_Late	NA	Model	NA	NA	Model	14195.7	192579	0.0737136
OBJ38812_TMT10.txt	1	OBJ38812_TMT10.txt_1	130C	A0A0N4SW73_MOUSE|A0A0N4SW73	14.2827	WT_Late_2	WT_Late	NA	Model	NA	NA	Model	19930.9	192579	0.103495
OBJ38812_TMT10.txt	1	OBJ38812_TMT10.txt_1	128C	A0A0N4SW73_MOUSE|A0A0N4SW73	14.1419	WT_Uninfect_1	WT_Uninfect	NA	Model	NA	NA	Model	18077.3	192579	0.0938693
OBJ38812_TMT10_p2.txt	1	OBJ38812_TMT10_p2.txt_1	127N	A0A0R4J009_MOUSE|A0A0R4J009	16.6582	KO_Early_3	KO_Early	NA	Model	NA	NA	Model	103426	1.3827e+06	0.0748001
OBJ38812_TMT10_p2.txt	1	OBJ38812_TMT10_p2.txt_1	130N	A0A0R4J009_MOUSE|A0A0R4J009	16.9113	KO_Early_4	KO_Early	NA	Model	NA	NA	Model	123253	1.3827e+06	0.0891393
OBJ38812_TMT10_p2.txt	1	OBJ38812_TMT10_p2.txt_1	128N	A0A0R4J009_MOUSE|A0A0R4J009	16.5764	KO_Late_3	KO_Late	NA	Model	NA	NA	Model	97725.1	1.3827e+06	0.070677
OBJ38812_TMT10_p2.txt	1	OBJ38812_TMT10_p2.txt_1	131N	A0A0R4J009_MOUSE|A0A0R4J009	16.7913	KO_Late_4	KO_Late	NA	Model	NA	NA	Model	113420	1.3827e+06	0.082028
OBJ38812_TMT10_p2.txt	1	OBJ38812_TMT10_p2.txt_1	129N	A0A0R4J009_MOUSE|A0A0R4J009	16.8152	KO_Uninfect_3	KO_Uninfect	NA	Model	NA	NA	Model	115311	1.3827e+06	0.0833953
OBJ38812_TMT10_p2.txt	1	OBJ38812_TMT10_p2.txt_1	126C	A0A0R4J009_MOUSE|A0A0R4J009	16.8104	WT_Early_3	WT_Early	NA	Model	NA	NA	Model	114930	1.3827e+06	0.0831202
OBJ38812_TMT10_p2.txt	1	OBJ38812_TMT10_p2.txt_1	129C	A0A0R4J009_MOUSE|A0A0R4J009	16.866	WT_Early_4	WT_Early	NA	Model	NA	NA	Model	119443	1.3827e+06	0.0863837
OBJ38812_TMT10_p2.txt	1	OBJ38812_TMT10_p2.txt_1	127C	A0A0R4J009_MOUSE|A0A0R4J009	16.9579	WT_Late_3	WT_Late	NA	Model	NA	NA	Model	127305	1.3827e+06	0.0920698
OBJ38812_TMT10_p2.txt	1	OBJ38812_TMT10_p2.txt_1	130C	A0A0R4J009_MOUSE|A0A0R4J009	16.877	WT_Late_4	WT_Late	NA	Model	NA	NA	Model	120360	1.3827e+06	0.087047
OBJ38812_TMT10_p2.txt	1	OBJ38812_TMT10_p2.txt_1	128C	A0A0R4J009_MOUSE|A0A0R4J009	16.7069	WT_Uninfect_3	WT_Uninfect	NA	Model	NA	NA	Model	106975	1.3827e+06	0.0773665
OBJ38812_TMT10_p2.txt	1	OBJ38812_TMT10_p2.txt_1	131C	A0A0R4J009_MOUSE|A0A0R4J009	16.9508	WT_Uninfect_4	WT_Uninfect	NA	Model	NA	NA	Model	126680	1.3827e+06	0.0916179
OBJ38812_TMT10_p2.txt	1	OBJ38812_TMT10_p2.txt_1	127N	A0A0R4J015_MOUSE|A0A0R4J015	15.5428	KO_Early_3	KO_Early	NA	Model	NA	NA	Model	47737.2	624337	0.0764606
OBJ38812_TMT10_p2.txt	1	OBJ38812_TMT10_p2.txt_1	130N	A0A0R4J015_MOUSE|A0A0R4J015	15.596	KO_Early_4	KO_Early	NA	Model	NA	NA	Model	49530	624337	0.0793321
OBJ38812_TMT10_p2.txt	1	OBJ38812_TMT10_p2.txt_1	128N	A0A0R4J015_MOUSE|A0A0R4J015	15.7313	KO_Late_3	KO_Late	NA	Model	NA	NA	Model	54400.9	624337	0.0871339
OBJ38812_TMT10_p2.txt	1	OBJ38812_TMT10_p2.txt_1	131N	A0A0R4J015_MOUSE|A0A0R4J015	15.5984	KO_Late_4	KO_Late	NA	Model	NA	NA	Model	49611.9	624337	0.0794633
OBJ38812_TMT10_p2.txt	1	OBJ38812_TMT10_p2.txt_1	129N	A0A0R4J015_MOUSE|A0A0R4J015	15.4413	KO_Uninfect_3	KO_Uninfect	NA	Model	NA	NA	Model	44491.9	624337	0.0712626
OBJ38812_TMT10_p2.txt	1	OBJ38812_TMT10_p2.txt_1	126C	A0A0R4J015_MOUSE|A0A0R4J015	15.553	WT_Early_3	WT_Early	NA	Model	NA	NA	Model	48075.2	624337	0.077002
OBJ38812_TMT10_p2.txt	1	OBJ38812_TMT10_p2.txt_1	129C	A0A0R4J015_MOUSE|A0A0R4J015	15.4734	WT_Early_4	WT_Early	NA	Model	NA	NA	Model	45494.6	624337	0.0728687
OBJ38812_TMT10_p2.txt	1	OBJ38812_TMT10_p2.txt_1	127C	A0A0R4J015_MOUSE|A0A0R4J015	15.4986	WT_Late_3	WT_Late	NA	Model	NA	NA	Model	46296.2	624337	0.0741526
OBJ38812_TMT10_p2.txt	1	OBJ38812_TMT10_p2.txt_1	130C	A0A0R4J015_MOUSE|A0A0R4J015	15.6807	WT_Late_4	WT_Late	NA	Model	NA	NA	Model	52525.6	624337	0.0841302
OBJ38812_TMT10_p2.txt	1	OBJ38812_TMT10_p2.txt_1	128C	A0A0R4J015_MOUSE|A0A0R4J015	15.9386	WT_Uninfect_3	WT_Uninfect	NA	Model	NA	NA	Model	62804.1	624337	0.100593
OBJ38812_TMT10_p2.txt	1	OBJ38812_TMT10_p2.txt_1	131C	A0A0R4J015_MOUSE|A0A0R4J015	16.1658	WT_Uninfect_4	WT_Uninfect	NA	Model	NA	NA	Model	73515.7	624337	0.11775
OBJ38812_TMT10_p2.txt	1	OBJ38812_TMT10_p2.txt_1	127N	A0A0R4J025_MOUSE|A0A0R4J025	16.1453	KO_Early_3	KO_Early	NA	Model	NA	NA	Model	72482.5	1.06267e+06	0.068208
OBJ38812_TMT10_p2.txt	1	OBJ38812_TMT10_p2.txt_1	130N	A0A0R4J025_MOUSE|A0A0R4J025	16.0593	KO_Early_4	KO_Early	NA	Model	NA	NA	Model	68287.4	1.06267e+06	0.0642603
OBJ38812_TMT10_p2.txt	1	OBJ38812_TMT10_p2.txt_1	128N	A0A0R4J025_MOUSE|A0A0R4J025	16.051	KO_Late_3	KO_Late	NA	Model	NA	NA	Model	67895.3	1.06267e+06	0.0638913
OBJ38812_TMT10_p2.txt	1	OBJ38812_TMT10_p2.txt_1	131N	A0A0R4J025_MOUSE|A0A0R4J025	15.9973	KO_Late_4	KO_Late	NA	Model	NA	NA	Model	65414.2	1.06267e+06	0.0615565
OBJ38812_TMT10_p2.txt	1	OBJ38812_TMT10_p2.txt_1	129N	A0A0R4J025_MOUSE|A0A0R4J025	16.0779	KO_Uninfect_3	KO_Uninfect	NA	Model	NA	NA	Model	69171.5	1.06267e+06	0.0650923
OBJ38812_TMT10_p2.txt	1	OBJ38812_TMT10_p2.txt_1	126C	A0A0R4J025_MOUSE|A0A0R4J025	16.5907	WT_Early_3	WT_Early	NA	Model	NA	NA	Model	98693.9	1.06267e+06	0.0928736
OBJ38812_TMT10_p2.txt	1	OBJ38812_TMT10_p2.txt_1	129C	A0A0R4J025_MOUSE|A0A0R4J025	16.7455	WT_Early_4	WT_Early	NA	Model	NA	NA	Model	109874	1.06267e+06	0.103395
OBJ38812_TMT10_p2.txt	1	OBJ38812_TMT10_p2.txt_1	127C	A0A0R4J025_MOUSE|A0A0R4J025	16.5734	WT_Late_3	WT_Late	NA	Model	NA	NA	Model	97519.5	1.06267e+06	0.0917685
OBJ38812_TMT10_p2.txt	1	OBJ38812_TMT10_p2.txt_1	130C	A0A0R4J025_MOUSE|A0A0R4J025	16.7282	WT_Late_4	WT_Late	NA	Model	NA	NA	Model	108565	1.06267e+06	0.102163
OBJ38812_TMT10_p2.txt	1	OBJ38812_TMT10_p2.txt_1	128C	A0A0R4J025_MOUSE|A0A0R4J025	16.3861	WT_Uninfect_3	WT_Uninfect	NA	Model	NA	NA	Model	85647	1.06267e+06	0.0805961
OBJ38812_TMT10_p2.txt	1	OBJ38812_TMT10_p2.txt_1	131C	A0A0R4J025_MOUSE|A0A0R4J025	17.0577	WT_Uninfect_4	WT_Uninfect	NA	Model	NA	NA	Model	136425	1.06267e+06	0.12838
OBJ38812_TMT10.txt	1	OBJ38812_TMT10.txt_1	127N	A0A0R4J025_MOUSE|A0A0R4J025	16.0863	KO_Early_1	KO_Early	NA	Model	NA	NA	Model	69573.6	1.0039e+06	0.0693036
OBJ38812_TMT10.txt	1	OBJ38812_TMT10.txt_1	130N	A0A0R4J025_MOUSE|A0A0R4J025	16.098	KO_Early_2	KO_Early	NA	Model	NA	NA	Model	70142.7	1.0039e+06	0.0698705
OBJ38812_TMT10.txt	1	OBJ38812_TMT10.txt_1	128N	A0A0R4J025_MOUSE|A0A0R4J025	16.0798	KO_Late_1	KO_Late	NA	Model	NA	NA	Model	69262.3	1.0039e+06	0.0689935
OBJ38812_TMT10.txt	1	OBJ38812_TMT10.txt_1	131N	A0A0R4J025_MOUSE|A0A0R4J025	16.2438	KO_Late_2	KO_Late	NA	Model	NA	NA	Model	77599.5	1.0039e+06	0.0772984
OBJ38812_TMT10.txt	1	OBJ38812_TMT10.txt_1	129N	A0A0R4J025_MOUSE|A0A0R4J025	16.2224	KO_Uninfect_1	KO_Uninfect	NA	Model	NA	NA	Model	76461.5	1.0039e+06	0.0761648
OBJ38812_TMT10.txt	1	OBJ38812_TMT10.txt_1	131C	A0A0R4J025_MOUSE|A0A0R4J025	16.3665	KO_Uninfect_2	KO_Uninfect	NA	Model	NA	NA	Model	84493.1	1.0039e+06	0.0841652
OBJ38812_TMT10.txt	1	OBJ38812_TMT10.txt_1	126C	A0A0R4J025_MOUSE|A0A0R4J025	16.5628	WT_Early_1	WT_Early	NA	Model	NA	NA	Model	96805.2	1.0039e+06	0.0964295
OBJ38812_TMT10.txt	1	OBJ38812_TMT10.txt_1	129C	A0A0R4J025_MOUSE|A0A0R4J025	16.5902	WT_Early_2	WT_Early	NA	Model	NA	NA	Model	98659.9	1.0039e+06	0.0982771
OBJ38812_TMT10.txt	1	OBJ38812_TMT10.txt_1	127C	A0A0R4J025_MOUSE|A0A0R4J025	16.2551	WT_Late_1	WT_Late	NA	Model	NA	NA	Model	78210.5	1.0039e+06	0.077907
OBJ38812_TMT10.txt	1	OBJ38812_TMT10.txt_1	130C	A0A0R4J025_MOUSE|A0A0R4J025	16.6707	WT_Late_2	WT_Late	NA	Model	NA	NA	Model	104323	1.0039e+06	0.103918
OBJ38812_TMT10.txt	1	OBJ38812_TMT10.txt_1	128C	A0A0R4J025_MOUSE|A0A0R4J025	16.5458	WT_Uninfect_1	WT_Uninfect	NA	Model	NA	NA	Model	95671.5	1.0039e+06	0.0953002
OBJ38812_TMT10_p2.txt	1	OBJ38812_TMT10_p2.txt_1	127N	A0A0R4J046_MOUSE|A0A0R4J046	16.7197	KO_Early_3	KO_Early	NA	Model	NA	NA	Model	107928	1.27848e+06	0.0844194
OBJ38812_TMT10_p2.txt	1	OBJ38812_TMT10_p2.txt_1	130N	A0A0R4J046_MOUSE|A0A0R4J046	16.5744	KO_Early_4	KO_Early	NA	Model	NA	NA	Model	97585.1	1.27848e+06	0.0763292
OBJ38812_TMT10_p2.txt	1	OBJ38812_TMT10_p2.txt_1	128N	A0A0R4J046_MOUSE|A0A0R4J046	16.5658	KO_Late_3	KO_Late	NA	Model	NA	NA	Model	97008.7	1.27848e+06	0.0758784
OBJ38812_TMT10_p2.txt	1	OBJ38812_TMT10_p2.txt_1	131N	A0A0R4J046_MOUSE|A0A0R4J046	16.5008	KO_Late_4	KO_Late	NA	Model	NA	NA	Model	92735.4	1.27848e+06	0.0725359
OBJ38812_TMT10_p2.txt	1	OBJ38812_TMT10_p2.txt_1	129N	A0A0R4J046_MOUSE|A0A0R4J046	16.4412	KO_Uninfect_3	KO_Uninfect	NA	Model	NA	NA	Model	88982.3	1.27848e+06	0.0696003
OBJ38812_TMT10_p2.txt	1	OBJ38812_TMT10_p2.txt_1	126C	A0A0R4J046_MOUSE|A0A0R4J046	16.9682	WT_Early_3	WT_Early	NA	Model	NA	NA	Model	128211	1.27848e+06	0.100285
OBJ38812_TMT10_p2.txt	1	OBJ38812_TMT10_p2.txt_1	129C	A0A0R4J046_MOUSE|A0A0R4J046	16.6667	WT_Early_4	WT_Early	NA	Model	NA	NA	Model	104033	1.27848e+06	0.0813729
OBJ38812_TMT10_p2.txt	1	OBJ38812_TMT10_p2.txt_1	127C	A0A0R4J046_MOUSE|A0A0R4J046	16.778	WT_Late_3	WT_Late	NA	Model	NA	NA	Model	112378	1.27848e+06	0.0879
OBJ38812_TMT10_p2.txt	1	OBJ38812_TMT10_p2.txt_1	130C	A0A0R4J046_MOUSE|A0A0R4J046	16.4861	WT_Late_4	WT_Late	NA	Model	NA	NA	Model	91791.7	1.27848e+06	0.0717977
OBJ38812_TMT10_p2.txt	1	OBJ38812_TMT10_p2.txt_1	128C	A0A0R4J046_MOUSE|A0A0R4J046	17.0336	WT_Uninfect_3	WT_Uninfect	NA	Model	NA	NA	Model	134159	1.27848e+06	0.104937
OBJ38812_TMT10_p2.txt	1	OBJ38812_TMT10_p2.txt_1	131C	A0A0R4J046_MOUSE|A0A0R4J046	16.8623	WT_Uninfect_4	WT_Uninfect	NA	Model	NA	NA	Model	119141	1.27848e+06	0.0931895
OBJ38812_TMT10_p2.txt	1	OBJ38812_TMT10_p2.txt_1	127N	A0A0R4J065_MOUSE|A0A0R4J065	12.6774	KO_Early_3	KO_Early	NA	Model	NA	NA	Model	6550.67	83770.2	0.078198
OBJ38812_TMT10_p2.txt	1	OBJ38812_TMT10_p2.txt_1	130N	A0A0R4J065_MOUSE|A0A0R4J065	12.5308	KO_Early_4	KO_Early	NA	Model	NA	NA	Model	5917.76	83770.2	0.0706428
OBJ38812_TMT10_p2.txt	1	OBJ38812_TMT10_p2.txt_1	128N	A0A0R4J065_MOUSE|A0A0R4J065	12.7828	KO_Late_3	KO_Late	NA	Model	NA	NA	Model	7046.84	83770.2	0.084121
OBJ38812_TMT10_p2.txt	1	OBJ38812_TMT10_p2.txt_1	131N	A0A0R4J065_MOUSE|A0A0R4J065	12.0402	KO_Late_4	KO_Late	NA	Model	NA	NA	Model	4211.82	83770.2	0.0502782
OBJ38812_TMT10_p2.txt	1	OBJ38812_TMT10_p2.txt_1	129N	A0A0R4J065_MOUSE|A0A0R4J065	12.887	KO_Uninfect_3	KO_Uninfect	NA	Model	NA	NA	Model	7574.79	83770.2	0.0904234
OBJ38812_TMT10_p2.txt	1	OBJ38812_TMT10_p2.txt_1	126C	A0A0R4J065_MOUSE|A0A0R4J065	13.0117	WT_Early_3	WT_Early	NA	Model	NA	NA	Model	8258.56	83770.2	0.0985859
OBJ38812_TMT10_p2.txt	1	OBJ38812_TMT10_p2.txt_1	129C	A0A0R4J065_MOUSE|A0A0R4J065	12.7475	WT_Early_4	WT_Early	NA	Model	NA	NA	Model	6876.48	83770.2	0.0820873
OBJ38812_TMT10_p2.txt	1	OBJ38812_TMT10_p2.txt_1	127C	A0A0R4J065_MOUSE|A0A0R4J065	12.526	WT_Late_3	WT_Late	NA	Model	NA	NA	Model	5898.07	83770.2	0.0704077
OBJ38812_TMT10_p2.txt	1	OBJ38812_TMT10_p2.txt_1	130C	A0A0R4J065_MOUSE|A0A0R4J065	12.8071	WT_Late_4	WT_Late	NA	Model	NA	NA	Model	7166.72	83770.2	0.0855521
OBJ38812_TMT10_p2.txt	1	OBJ38812_TMT10_p2.txt_1	128C	A0A0R4J065_MOUSE|A0A0R4J065	13.3189	WT_Uninfect_3	WT_Uninfect	NA	Model	NA	NA	Model	10218.2	83770.2	0.121979
OBJ38812_TMT10_p2.txt	1	OBJ38812_TMT10_p2.txt_1	131C	A0A0R4J065_MOUSE|A0A0R4J065	12.8223	WT_Uninfect_4	WT_Uninfect	NA	Model	NA	NA	Model	7242.73	83770.2	0.0864595
OBJ38812_TMT10.txt	1	OBJ38812_TMT10.txt_1	127N	A0A0R4J065_MOUSE|A0A0R4J065	12.9819	KO_Early_1	KO_Early	NA	Model	NA	NA	Model	8089.69	85012.4	0.0951589
OBJ38812_TMT10.txt	1	OBJ38812_TMT10.txt_1	130N	A0A0R4J065_MOUSE|A0A0R4J065	12.9394	KO_Early_2	KO_Early	NA	Model	NA	NA	Model	7855.14	85012.4	0.0923999
OBJ38812_TMT10.txt	1	OBJ38812_TMT10.txt_1	128N	A0A0R4J065_MOUSE|A0A0R4J065	12.7599	KO_Late_1	KO_Late	NA	Model	NA	NA	Model	6935.82	85012.4	0.0815859
OBJ38812_TMT10.txt	1	OBJ38812_TMT10.txt_1	131N	A0A0R4J065_MOUSE|A0A0R4J065	12.887	KO_Late_2	KO_Late	NA	Model	NA	NA	Model	7575.09	85012.4	0.0891057
OBJ38812_TMT10.txt	1	OBJ38812_TMT10.txt_1	129N	A0A0R4J065_MOUSE|A0A0R4J065	12.833	KO_Uninfect_1	KO_Uninfect	NA	Model	NA	NA	Model	7296.42	85012.4	0.0858277
OBJ38812_TMT10.txt	1	OBJ38812_TMT10.txt_1	131C	A0A0R4J065_MOUSE|A0A0R4J065	13.1932	KO_Uninfect_2	KO_Uninfect	NA	Model	NA	NA	Model	9365.63	85012.4	0.110168
OBJ38812_TMT10.txt	1	OBJ38812_TMT10.txt_1	126C	A0A0R4J065_MOUSE|A0A0R4J065	12.621	WT_Early_1	WT_Early	NA	Model	NA	NA	Model	6299.48	85012.4	0.0741007
OBJ38812_TMT10.txt	1	OBJ38812_TMT10.txt_1	129C	A0A0R4J065_MOUSE|A0A0R4J065	12.6313	WT_Early_2	WT_Early	NA	Model	NA	NA	Model	6344.59	85012.4	0.0746314
OBJ38812_TMT10.txt	1	OBJ38812_TMT10.txt_1	127C	A0A0R4J065_MOUSE|A0A0R4J065	12.6112	WT_Late_1	WT_Late	NA	Model	NA	NA	Model	6256.71	85012.4	0.0735976
OBJ38812_TMT10.txt	1	OBJ38812_TMT10.txt_1	130C	A0A0R4J065_MOUSE|A0A0R4J065	12.1883	WT_Late_2	WT_Late	NA	Model	NA	NA	Model	4667.14	85012.4	0.0548995
OBJ38812_TMT10.txt	1	OBJ38812_TMT10.txt_1	128C	A0A0R4J065_MOUSE|A0A0R4J065	12.8763	WT_Uninfect_1	WT_Uninfect	NA	Model	NA	NA	Model	7519.09	85012.4	0.088447
OBJ38812_TMT10_p2.txt	1	OBJ38812_TMT10_p2.txt_1	127N	A0A0R4J072_MOUSE|A0A0R4J072	14.3392	KO_Early_3	KO_Early	NA	Model	NA	NA	Model	20726.6	186752	0.110985
OBJ38812_TMT10_p2.txt	1	OBJ38812_TMT10_p2.txt_1	130N	A0A0R4J072_MOUSE|A0A0R4J072	14.0806	KO_Early_4	KO_Early	NA	Model	NA	NA	Model	17325.1	186752	0.0927711
OBJ38812_TMT10_p2.txt	1	OBJ38812_TMT10_p2.txt_1	128N	A0A0R4J072_MOUSE|A0A0R4J072	14.4732	KO_Late_3	KO_Late	NA	Model	NA	NA	Model	22744.7	186752	0.121791
OBJ38812_TMT10_p2.txt	1	OBJ38812_TMT10_p2.txt_1	131N	A0A0R4J072_MOUSE|A0A0R4J072	14.0458	KO_Late_4	KO_Late	NA	Model	NA	NA	Model	16912.2	186752	0.09056
OBJ38812_TMT10_p2.txt	1	OBJ38812_TMT10_p2.txt_1	129N	A0A0R4J072_MOUSE|A0A0R4J072	14.0564	KO_Uninfect_3	KO_Uninfect	NA	Model	NA	NA	Model	17037.2	186752	0.0912294
OBJ38812_TMT10_p2.txt	1	OBJ38812_TMT10_p2.txt_1	126C	A0A0R4J072_MOUSE|A0A0R4J072	13.1807	WT_Early_3	WT_Early	NA	Model	NA	NA	Model	9285.25	186752	0.0497198
OBJ38812_TMT10_p2.txt	1	OBJ38812_TMT10_p2.txt_1	129C	A0A0R4J072_MOUSE|A0A0R4J072	13.7147	WT_Early_4	WT_Early	NA	Model	NA	NA	Model	13443.9	186752	0.0719882
OBJ38812_TMT10_p2.txt	1	OBJ38812_TMT10_p2.txt_1	127C	A0A0R4J072_MOUSE|A0A0R4J072	13.3893	WT_Late_3	WT_Late	NA	Model	NA	NA	Model	10729.4	186752	0.0574527
OBJ38812_TMT10_p2.txt	1	OBJ38812_TMT10_p2.txt_1	130C	A0A0R4J072_MOUSE|A0A0R4J072	13.68	WT_Late_4	WT_Late	NA	Model	NA	NA	Model	13125	186752	0.0702804
OBJ38812_TMT10_p2.txt	1	OBJ38812_TMT10_p2.txt_1	128C	A0A0R4J072_MOUSE|A0A0R4J072	13.8815	WT_Uninfect_3	WT_Uninfect	NA	Model	NA	NA	Model	15092.2	186752	0.0808145
OBJ38812_TMT10_p2.txt	1	OBJ38812_TMT10_p2.txt_1	131C	A0A0R4J072_MOUSE|A0A0R4J072	13.8928	WT_Uninfect_4	WT_Uninfect	NA	Model	NA	NA	Model	15210.2	186752	0.0814462
OBJ38812_TMT10.txt	1	OBJ38812_TMT10.txt_1	127N	A0A0R4J072_MOUSE|A0A0R4J072	13.885	KO_Early_1	KO_Early	NA	Model	NA	NA	Model	15128.7	187018	0.0808947
OBJ38812_TMT10.txt	1	OBJ38812_TMT10.txt_1	130N	A0A0R4J072_MOUSE|A0A0R4J072	14.1936	KO_Early_2	KO_Early	NA	Model	NA	NA	Model	18737.5	187018	0.100191
OBJ38812_TMT10.txt	1	OBJ38812_TMT10.txt_1	128N	A0A0R4J072_MOUSE|A0A0R4J072	14.1688	KO_Late_1	KO_Late	NA	Model	NA	NA	Model	18418.2	187018	0.0984837
OBJ38812_TMT10.txt	1	OBJ38812_TMT10.txt_1	131N	A0A0R4J072_MOUSE|A0A0R4J072	14.2006	KO_Late_2	KO_Late	NA	Model	NA	NA	Model	18827.7	187018	0.100673
OBJ38812_TMT10.txt	1	OBJ38812_TMT10.txt_1	129N	A0A0R4J072_MOUSE|A0A0R4J072	13.7401	KO_Uninfect_1	KO_Uninfect	NA	Model	NA	NA	Model	13683.1	187018	0.0731645
OBJ38812_TMT10.txt	1	OBJ38812_TMT10.txt_1	131C	A0A0R4J072_MOUSE|A0A0R4J072	14.1616	KO_Uninfect_2	KO_Uninfect	NA	Model	NA	NA	Model	18325.7	187018	0.0979891
OBJ38812_TMT10.txt	1	OBJ38812_TMT10.txt_1	126C	A0A0R4J072_MOUSE|A0A0R4J072	13.7015	WT_Early_1	WT_Early	NA	Model	NA	NA	Model	13322.1	187018	0.0712347
OBJ38812_TMT10.txt	1	OBJ38812_TMT10.txt_1	129C	A0A0R4J072_MOUSE|A0A0R4J072	13.5885	WT_Early_2	WT_Early	NA	Model	NA	NA	Model	12318.4	187018	0.0658673
OBJ38812_TMT10.txt	1	OBJ38812_TMT10.txt_1	127C	A0A0R4J072_MOUSE|A0A0R4J072	13.905	WT_Late_1	WT_Late	NA	Model	NA	NA	Model	15339.4	187018	0.0820209
OBJ38812_TMT10.txt	1	OBJ38812_TMT10.txt_1	130C	A0A0R4J072_MOUSE|A0A0R4J072	14.0414	WT_Late_2	WT_Late	NA	Model	NA	NA	Model	16860.8	187018	0.0901561
OBJ38812_TMT10.txt	1	OBJ38812_TMT10.txt_1	128C	A0A0R4J072_MOUSE|A0A0R4J072	13.4169	WT_Uninfect_1	WT_Uninfect	NA	Model	NA	NA	Model	10936.4	187018	0.0584781
OBJ38812_TMT10_p2.txt	1	OBJ38812_TMT10_p2.txt_1	127N	A0A0R4J078_MOUSE|A0A0R4J078	15.2419	KO_Early_3	KO_Early	NA	Model	NA	NA	Model	38749.2	394665	0.0981825
OBJ38812_TMT10_p2.txt	1	OBJ38812_TMT10_p2.txt_1	130N	A0A0R4J078_MOUSE|A0A0R4J078	15.4378	KO_Early_4	KO_Early	NA	Model	NA	NA	Model	44384.1	394665	0.11246
OBJ38812_TMT10_p2.txt	1	OBJ38812_TMT10_p2.txt_1	128N	A0A0R4J078_MOUSE|A0A0R4J078	15.0012	KO_Late_3	KO_Late	NA	Model	NA	NA	Model	32795.1	394665	0.0830959
OBJ38812_TMT10_p2.txt	1	OBJ38812_TMT10_p2.txt_1	131N	A0A0R4J078_MOUSE|A0A0R4J078	15.0904	KO_Late_4	KO_Late	NA	Model	NA	NA	Model	34886.8	394665	0.0883959
OBJ38812_TMT10_p2.txt	1	OBJ38812_TMT10_p2.txt_1	129N	A0A0R4J078_MOUSE|A0A0R4J078	15.0387	KO_Uninfect_3	KO_Uninfect	NA	Model	NA	NA	Model	33658.8	394665	0.0852845
OBJ38812_TMT10_p2.txt	1	OBJ38812_TMT10_p2.txt_1	126C	A0A0R4J078_MOUSE|A0A0R4J078	14.3819	WT_Early_3	WT_Early	NA	Model	NA	NA	Model	21349.4	394665	0.0540948
OBJ38812_TMT10_p2.txt	1	OBJ38812_TMT10_p2.txt_1	129C	A0A0R4J078_MOUSE|A0A0R4J078	14.5247	WT_Early_4	WT_Early	NA	Model	NA	NA	Model	23570.5	394665	0.0597227
OBJ38812_TMT10_p2.txt	1	OBJ38812_TMT10_p2.txt_1	127C	A0A0R4J078_MOUSE|A0A0R4J078	14.5377	WT_Late_3	WT_Late	NA	Model	NA	NA	Model	23784.4	394665	0.0602647
OBJ38812_TMT10_p2.txt	1	OBJ38812_TMT10_p2.txt_1	130C	A0A0R4J078_MOUSE|A0A0R4J078	14.6711	WT_Late_4	WT_Late	NA	Model	NA	NA	Model	26087.4	394665	0.0661001
OBJ38812_TMT10_p2.txt	1	OBJ38812_TMT10_p2.txt_1	128C	A0A0R4J078_MOUSE|A0A0R4J078	14.9641	WT_Uninfect_3	WT_Uninfect	NA	Model	NA	NA	Model	31963.3	394665	0.0809884
OBJ38812_TMT10_p2.txt	1	OBJ38812_TMT10_p2.txt_1	131C	A0A0R4J078_MOUSE|A0A0R4J078	15.6963	WT_Uninfect_4	WT_Uninfect	NA	Model	NA	NA	Model	53096.2	394665	0.134535
OBJ38812_TMT10_p2.txt	1	OBJ38812_TMT10_p2.txt_1	127N	A0A0R4J0B4_MOUSE|A0A0R4J0B4	12.4972	KO_Early_3	KO_Early	NA	Model	NA	NA	Model	5781.2	60557.2	0.0954667
OBJ38812_TMT10_p2.txt	1	OBJ38812_TMT10_p2.txt_1	130N	A0A0R4J0B4_MOUSE|A0A0R4J0B4	11.7048	KO_Early_4	KO_Early	NA	Model	NA	NA	Model	3338	60557.2	0.0551215
OBJ38812_TMT10_p2.txt	1	OBJ38812_TMT10_p2.txt_1	128N	A0A0R4J0B4_MOUSE|A0A0R4J0B4	12.1757	KO_Late_3	KO_Late	NA	Model	NA	NA	Model	4626.48	60557.2	0.0763985
OBJ38812_TMT10_p2.txt	1	OBJ38812_TMT10_p2.txt_1	131N	A0A0R4J0B4_MOUSE|A0A0R4J0B4	12.1836	KO_Late_4	KO_Late	NA	Model	NA	NA	Model	4652.02	60557.2	0.0768202
OBJ38812_TMT10_p2.txt	1	OBJ38812_TMT10_p2.txt_1	129N	A0A0R4J0B4_MOUSE|A0A0R4J0B4	12.0855	KO_Uninfect_3	KO_Uninfect	NA	Model	NA	NA	Model	4345.98	60557.2	0.0717666
OBJ38812_TMT10_p2.txt	1	OBJ38812_TMT10_p2.txt_1	126C	A0A0R4J0B4_MOUSE|A0A0R4J0B4	12.625	WT_Early_3	WT_Early	NA	Model	NA	NA	Model	6317.07	60557.2	0.104316
OBJ38812_TMT10_p2.txt	1	OBJ38812_TMT10_p2.txt_1	129C	A0A0R4J0B4_MOUSE|A0A0R4J0B4	12.5052	WT_Early_4	WT_Early	NA	Model	NA	NA	Model	5813.68	60557.2	0.0960031
OBJ38812_TMT10_p2.txt	1	OBJ38812_TMT10_p2.txt_1	127C	A0A0R4J0B4_MOUSE|A0A0R4J0B4	12.6475	WT_Late_3	WT_Late	NA	Model	NA	NA	Model	6416.22	60557.2	0.105953
OBJ38812_TMT10_p2.txt	1	OBJ38812_TMT10_p2.txt_1	130C	A0A0R4J0B4_MOUSE|A0A0R4J0B4	12.4254	WT_Late_4	WT_Late	NA	Model	NA	NA	Model	5500.85	60557.2	0.0908372
OBJ38812_TMT10_p2.txt	1	OBJ38812_TMT10_p2.txt_1	128C	A0A0R4J0B4_MOUSE|A0A0R4J0B4	11.4222	WT_Uninfect_3	WT_Uninfect	NA	Model	NA	NA	Model	2744.2	60557.2	0.0453158
OBJ38812_TMT10_p2.txt	1	OBJ38812_TMT10_p2.txt_1	131C	A0A0R4J0B4_MOUSE|A0A0R4J0B4	12.6043	WT_Uninfect_4	WT_Uninfect	NA	Model	NA	NA	Model	6226.86	60557.2	0.102826
OBJ38812_TMT10_p2.txt	1	OBJ38812_TMT10_p2.txt_1	127N	A0A0R4J0B5_MOUSE|A0A0R4J0B5	13.1542	KO_Early_3	KO_Early	NA	Model	NA	NA	Model	9115.92	108477	0.0840355
OBJ38812_TMT10_p2.txt	1	OBJ38812_TMT10_p2.txt_1	130N	A0A0R4J0B5_MOUSE|A0A0R4J0B5	13.1816	KO_Early_4	KO_Early	NA	Model	NA	NA	Model	9291.05	108477	0.0856499
OBJ38812_TMT10_p2.txt	1	OBJ38812_TMT10_p2.txt_1	128N	A0A0R4J0B5_MOUSE|A0A0R4J0B5	12.6978	KO_Late_3	KO_Late	NA	Model	NA	NA	Model	6643.96	108477	0.0612476
OBJ38812_TMT10_p2.txt	1	OBJ38812_TMT10_p2.txt_1	131N	A0A0R4J0B5_MOUSE|A0A0R4J0B5	13.4116	KO_Late_4	KO_Late	NA	Model	NA	NA	Model	10896.8	108477	0.100453
OBJ38812_TMT10_p2.txt	1	OBJ38812_TMT10_p2.txt_1	129N	A0A0R4J0B5_MOUSE|A0A0R4J0B5	13.3318	KO_Uninfect_3	KO_Uninfect	NA	Model	NA	NA	Model	10310.1	108477	0.0950443
OBJ38812_TMT10_p2.txt	1	OBJ38812_TMT10_p2.txt_1	126C	A0A0R4J0B5_MOUSE|A0A0R4J0B5	13.1486	WT_Early_3	WT_Early	NA	Model	NA	NA	Model	9081.07	108477	0.0837142
OBJ38812_TMT10_p2.txt	1	OBJ38812_TMT10_p2.txt_1	129C	A0A0R4J0B5_MOUSE|A0A0R4J0B5	12.9712	WT_Early_4	WT_Early	NA	Model	NA	NA	Model	8030.32	108477	0.0740278
OBJ38812_TMT10_p2.txt	1	OBJ38812_TMT10_p2.txt_1	127C	A0A0R4J0B5_MOUSE|A0A0R4J0B5	12.8445	WT_Late_3	WT_Late	NA	Model	NA	NA	Model	7354.84	108477	0.0678008
OBJ38812_TMT10_p2.txt	1	OBJ38812_TMT10_p2.txt_1	130C	A0A0R4J0B5_MOUSE|A0A0R4J0B5	12.5362	WT_Late_4	WT_Late	NA	Model	NA	NA	Model	5939.64	108477	0.0547548
OBJ38812_TMT10_p2.txt	1	OBJ38812_TMT10_p2.txt_1	128C	A0A0R4J0B5_MOUSE|A0A0R4J0B5	13.6715	WT_Uninfect_3	WT_Uninfect	NA	Model	NA	NA	Model	13047.8	108477	0.120282
OBJ38812_TMT10_p2.txt	1	OBJ38812_TMT10_p2.txt_1	131C	A0A0R4J0B5_MOUSE|A0A0R4J0B5	13.2901	WT_Uninfect_4	WT_Uninfect	NA	Model	NA	NA	Model	10016.5	108477	0.0923376
OBJ38812_TMT10.txt	1	OBJ38812_TMT10.txt_1	127N	A0A0R4J0B5_MOUSE|A0A0R4J0B5	13.0059	KO_Early_1	KO_Early	NA	Model	NA	NA	Model	8225.72	107250	0.0766967
OBJ38812_TMT10.txt	1	OBJ38812_TMT10.txt_1	130N	A0A0R4J0B5_MOUSE|A0A0R4J0B5	13.4987	KO_Early_2	KO_Early	NA	Model	NA	NA	Model	11575.1	107250	0.107927
OBJ38812_TMT10.txt	1	OBJ38812_TMT10.txt_1	128N	A0A0R4J0B5_MOUSE|A0A0R4J0B5	13.4812	KO_Late_1	KO_Late	NA	Model	NA	NA	Model	11435.1	107250	0.106621
OBJ38812_TMT10.txt	1	OBJ38812_TMT10.txt_1	131N	A0A0R4J0B5_MOUSE|A0A0R4J0B5	13.2047	KO_Late_2	KO_Late	NA	Model	NA	NA	Model	9440.83	107250	0.0880264
OBJ38812_TMT10.txt	1	OBJ38812_TMT10.txt_1	129N	A0A0R4J0B5_MOUSE|A0A0R4J0B5	13.2468	KO_Uninfect_1	KO_Uninfect	NA	Model	NA	NA	Model	9720.7	107250	0.0906358
OBJ38812_TMT10.txt	1	OBJ38812_TMT10.txt_1	131C	A0A0R4J0B5_MOUSE|A0A0R4J0B5	13.2413	KO_Uninfect_2	KO_Uninfect	NA	Model	NA	NA	Model	9683.72	107250	0.0902911
OBJ38812_TMT10.txt	1	OBJ38812_TMT10.txt_1	126C	A0A0R4J0B5_MOUSE|A0A0R4J0B5	12.8691	WT_Early_1	WT_Early	NA	Model	NA	NA	Model	7481.59	107250	0.0697584
OBJ38812_TMT10.txt	1	OBJ38812_TMT10.txt_1	129C	A0A0R4J0B5_MOUSE|A0A0R4J0B5	12.883	WT_Early_2	WT_Early	NA	Model	NA	NA	Model	7554.13	107250	0.0704347
OBJ38812_TMT10.txt	1	OBJ38812_TMT10.txt_1	127C	A0A0R4J0B5_MOUSE|A0A0R4J0B5	13.1321	WT_Late_1	WT_Late	NA	Model	NA	NA	Model	8977.63	107250	0.0837075
OBJ38812_TMT10.txt	1	OBJ38812_TMT10.txt_1	130C	A0A0R4J0B5_MOUSE|A0A0R4J0B5	12.7673	WT_Late_2	WT_Late	NA	Model	NA	NA	Model	6971.78	107250	0.0650049
OBJ38812_TMT10.txt	1	OBJ38812_TMT10.txt_1	128C	A0A0R4J0B5_MOUSE|A0A0R4J0B5	12.8601	WT_Uninfect_1	WT_Uninfect	NA	Model	NA	NA	Model	7434.72	107250	0.0693213
OBJ38812_TMT10_p2.txt	1	OBJ38812_TMT10_p2.txt_1	127N	A0A0R4J0E4_MOUSE|A0A0R4J0E4	14.4673	KO_Early_3	KO_Early	NA	Model	NA	NA	Model	22651.4	305640	0.0741112
OBJ38812_TMT10_p2.txt	1	OBJ38812_TMT10_p2.txt_1	130N	A0A0R4J0E4_MOUSE|A0A0R4J0E4	14.6728	KO_Early_4	KO_Early	NA	Model	NA	NA	Model	26118.6	305640	0.0854554
OBJ38812_TMT10_p2.txt	1	OBJ38812_TMT10_p2.txt_1	128N	A0A0R4J0E4_MOUSE|A0A0R4J0E4	14.6871	KO_Late_3	KO_Late	NA	Model	NA	NA	Model	26378.6	305640	0.0863062
OBJ38812_TMT10_p2.txt	1	OBJ38812_TMT10_p2.txt_1	131N	A0A0R4J0E4_MOUSE|A0A0R4J0E4	14.4616	KO_Late_4	KO_Late	NA	Model	NA	NA	Model	22562	305640	0.0738189
OBJ38812_TMT10_p2.txt	1	OBJ38812_TMT10_p2.txt_1	129N	A0A0R4J0E4_MOUSE|A0A0R4J0E4	14.5278	KO_Uninfect_3	KO_Uninfect	NA	Model	NA	NA	Model	23622	305640	0.0772869
OBJ38812_TMT10_p2.txt	1	OBJ38812_TMT10_p2.txt_1	126C	A0A0R4J0E4_MOUSE|A0A0R4J0E4	14.6602	WT_Early_3	WT_Early	NA	Model	NA	NA	Model	25891.4	305640	0.084712
OBJ38812_TMT10_p2.txt	1	OBJ38812_TMT10_p2.txt_1	129C	A0A0R4J0E4_MOUSE|A0A0R4J0E4	14.5256	WT_Early_4	WT_Early	NA	Model	NA	NA	Model	23584.9	305640	0.0771654
OBJ38812_TMT10_p2.txt	1	OBJ38812_TMT10_p2.txt_1	127C	A0A0R4J0E4_MOUSE|A0A0R4J0E4	14.5661	WT_Late_3	WT_Late	NA	Model	NA	NA	Model	24256.7	305640	0.0793637
OBJ38812_TMT10_p2.txt	1	OBJ38812_TMT10_p2.txt_1	130C	A0A0R4J0E4_MOUSE|A0A0R4J0E4	14.4288	WT_Late_4	WT_Late	NA	Model	NA	NA	Model	22055.4	305640	0.0721612
OBJ38812_TMT10_p2.txt	1	OBJ38812_TMT10_p2.txt_1	128C	A0A0R4J0E4_MOUSE|A0A0R4J0E4	14.8192	WT_Uninfect_3	WT_Uninfect	NA	Model	NA	NA	Model	28908.2	305640	0.0945824
OBJ38812_TMT10_p2.txt	1	OBJ38812_TMT10_p2.txt_1	131C	A0A0R4J0E4_MOUSE|A0A0R4J0E4	15.0988	WT_Uninfect_4	WT_Uninfect	NA	Model	NA	NA	Model	35091.4	305640	0.114813
OBJ38812_TMT10.txt	1	OBJ38812_TMT10.txt_1	127N	A0A0R4J0E4_MOUSE|A0A0R4J0E4	14.5926	KO_Early_1	KO_Early	NA	Model	NA	NA	Model	24706.8	291433	0.0847769
OBJ38812_TMT10.txt	1	OBJ38812_TMT10.txt_1	130N	A0A0R4J0E4_MOUSE|A0A0R4J0E4	14.5399	KO_Early_2	KO_Early	NA	Model	NA	NA	Model	23819.4	291433	0.0817322
OBJ38812_TMT10.txt	1	OBJ38812_TMT10.txt_1	128N	A0A0R4J0E4_MOUSE|A0A0R4J0E4	14.3403	KO_Late_1	KO_Late	NA	Model	NA	NA	Model	20742.6	291433	0.0711746
OBJ38812_TMT10.txt	1	OBJ38812_TMT10.txt_1	131N	A0A0R4J0E4_MOUSE|A0A0R4J0E4	14.6063	KO_Late_2	KO_Late	NA	Model	NA	NA	Model	24941.7	291433	0.0855831
OBJ38812_TMT10.txt	1	OBJ38812_TMT10.txt_1	129N	A0A0R4J0E4_MOUSE|A0A0R4J0E4	14.6299	KO_Uninfect_1	KO_Uninfect	NA	Model	NA	NA	Model	25353.4	291433	0.0869959
OBJ38812_TMT10.txt	1	OBJ38812_TMT10.txt_1	131C	A0A0R4J0E4_MOUSE|A0A0R4J0E4	14.3695	KO_Uninfect_2	KO_Uninfect	NA	Model	NA	NA	Model	21166.5	291433	0.072629
OBJ38812_TMT10.txt	1	OBJ38812_TMT10.txt_1	126C	A0A0R4J0E4_MOUSE|A0A0R4J0E4	14.5494	WT_Early_1	WT_Early	NA	Model	NA	NA	Model	23978.3	291433	0.0822773
OBJ38812_TMT10.txt	1	OBJ38812_TMT10.txt_1	129C	A0A0R4J0E4_MOUSE|A0A0R4J0E4	14.6683	WT_Early_2	WT_Early	NA	Model	NA	NA	Model	26037.8	291433	0.089344
OBJ38812_TMT10.txt	1	OBJ38812_TMT10.txt_1	127C	A0A0R4J0E4_MOUSE|A0A0R4J0E4	14.6141	WT_Late_1	WT_Late	NA	Model	NA	NA	Model	25078.2	291433	0.0860513
OBJ38812_TMT10.txt	1	OBJ38812_TMT10.txt_1	130C	A0A0R4J0E4_MOUSE|A0A0R4J0E4	14.5469	WT_Late_2	WT_Late	NA	Model	NA	NA	Model	23935.8	291433	0.0821317
OBJ38812_TMT10.txt	1	OBJ38812_TMT10.txt_1	128C	A0A0R4J0E4_MOUSE|A0A0R4J0E4	14.7288	WT_Uninfect_1	WT_Uninfect	NA	Model	NA	NA	Model	27152.5	291433	0.093169
OBJ38812_TMT10_p2.txt	1	OBJ38812_TMT10_p2.txt_1	127N	A0A0R4J0H6_MOUSE|A0A0R4J0H6	15.3935	KO_Early_3	KO_Early	NA	Model	NA	NA	Model	43044	589776	0.0729836
OBJ38812_TMT10_p2.txt	1	OBJ38812_TMT10_p2.txt_1	130N	A0A0R4J0H6_MOUSE|A0A0R4J0H6	15.5432	KO_Early_4	KO_Early	NA	Model	NA	NA	Model	47748.8	589776	0.0809609
OBJ38812_TMT10_p2.txt	1	OBJ38812_TMT10_p2.txt_1	128N	A0A0R4J0H6_MOUSE|A0A0R4J0H6	15.9366	KO_Late_3	KO_Late	NA	Model	NA	NA	Model	62718.7	589776	0.106343
OBJ38812_TMT10_p2.txt	1	OBJ38812_TMT10_p2.txt_1	131N	A0A0R4J0H6_MOUSE|A0A0R4J0H6	15.9554	KO_Late_4	KO_Late	NA	Model	NA	NA	Model	63540.9	589776	0.107737
OBJ38812_TMT10_p2.txt	1	OBJ38812_TMT10_p2.txt_1	129N	A0A0R4J0H6_MOUSE|A0A0R4J0H6	15.5013	KO_Uninfect_3	KO_Uninfect	NA	Model	NA	NA	Model	46382.1	589776	0.0786435
OBJ38812_TMT10_p2.txt	1	OBJ38812_TMT10_p2.txt_1	126C	A0A0R4J0H6_MOUSE|A0A0R4J0H6	14.8673	WT_Early_3	WT_Early	NA	Model	NA	NA	Model	29888.9	589776	0.0506784
OBJ38812_TMT10_p2.txt	1	OBJ38812_TMT10_p2.txt_1	129C	A0A0R4J0H6_MOUSE|A0A0R4J0H6	14.9396	WT_Early_4	WT_Early	NA	Model	NA	NA	Model	31425.1	589776	0.0532831
OBJ38812_TMT10_p2.txt	1	OBJ38812_TMT10_p2.txt_1	127C	A0A0R4J0H6_MOUSE|A0A0R4J0H6	15.3944	WT_Late_3	WT_Late	NA	Model	NA	NA	Model	43069.4	589776	0.0730267
OBJ38812_TMT10_p2.txt	1	OBJ38812_TMT10_p2.txt_1	130C	A0A0R4J0H6_MOUSE|A0A0R4J0H6	15.532	WT_Late_4	WT_Late	NA	Model	NA	NA	Model	47380.6	589776	0.0803366
OBJ38812_TMT10_p2.txt	1	OBJ38812_TMT10_p2.txt_1	128C	A0A0R4J0H6_MOUSE|A0A0R4J0H6	15.9886	WT_Uninfect_3	WT_Uninfect	NA	Model	NA	NA	Model	65021.5	589776	0.110248
OBJ38812_TMT10_p2.txt	1	OBJ38812_TMT10_p2.txt_1	131C	A0A0R4J0H6_MOUSE|A0A0R4J0H6	15.9442	WT_Uninfect_4	WT_Uninfect	NA	Model	NA	NA	Model	63048.1	589776	0.106902
OBJ38812_TMT10_p2.txt	1	OBJ38812_TMT10_p2.txt_1	127N	A0A0R4J0H7_MOUSE|A0A0R4J0H7	17.0904	KO_Early_3	KO_Early	NA	Model	NA	NA	Model	139548	2.85963e+06	0.0487994
OBJ38812_TMT10_p2.txt	1	OBJ38812_TMT10_p2.txt_1	130N	A0A0R4J0H7_MOUSE|A0A0R4J0H7	17.8099	KO_Early_4	KO_Early	NA	Model	NA	NA	Model	229783	2.85963e+06	0.0803542
OBJ38812_TMT10_p2.txt	1	OBJ38812_TMT10_p2.txt_1	128N	A0A0R4J0H7_MOUSE|A0A0R4J0H7	17.1358	KO_Late_3	KO_Late	NA	Model	NA	NA	Model	144009	2.85963e+06	0.0503593
OBJ38812_TMT10_p2.txt	1	OBJ38812_TMT10_p2.txt_1	131N	A0A0R4J0H7_MOUSE|A0A0R4J0H7	17.4765	KO_Late_4	KO_Late	NA	Model	NA	NA	Model	182370	2.85963e+06	0.0637742
OBJ38812_TMT10_p2.txt	1	OBJ38812_TMT10_p2.txt_1	129N	A0A0R4J0H7_MOUSE|A0A0R4J0H7	17.1175	KO_Uninfect_3	KO_Uninfect	NA	Model	NA	NA	Model	142192	2.85963e+06	0.049724
OBJ38812_TMT10_p2.txt	1	OBJ38812_TMT10_p2.txt_1	126C	A0A0R4J0H7_MOUSE|A0A0R4J0H7	18.1203	WT_Early_3	WT_Early	NA	Model	NA	NA	Model	284948	2.85963e+06	0.0996452
OBJ38812_TMT10_p2.txt	1	OBJ38812_TMT10_p2.txt_1	129C	A0A0R4J0H7_MOUSE|A0A0R4J0H7	17.973	WT_Early_4	WT_Early	NA	Model	NA	NA	Model	257283	2.85963e+06	0.0899709
OBJ38812_TMT10_p2.txt	1	OBJ38812_TMT10_p2.txt_1	127C	A0A0R4J0H7_MOUSE|A0A0R4J0H7	18.1399	WT_Late_3	WT_Late	NA	Model	NA	NA	Model	288830	2.85963e+06	0.101003
OBJ38812_TMT10_p2.txt	1	OBJ38812_TMT10_p2.txt_1	130C	A0A0R4J0H7_MOUSE|A0A0R4J0H7	17.947	WT_Late_4	WT_Late	NA	Model	NA	NA	Model	252683	2.85963e+06	0.0883622
OBJ38812_TMT10_p2.txt	1	OBJ38812_TMT10_p2.txt_1	128C	A0A0R4J0H7_MOUSE|A0A0R4J0H7	18.439	WT_Uninfect_3	WT_Uninfect	NA	Model	NA	NA	Model	355383	2.85963e+06	0.124276
OBJ38812_TMT10_p2.txt	1	OBJ38812_TMT10_p2.txt_1	131C	A0A0R4J0H7_MOUSE|A0A0R4J0H7	18.4813	WT_Uninfect_4	WT_Uninfect	NA	Model	NA	NA	Model	365959	2.85963e+06	0.127974
OBJ38812_TMT10_p2.txt	1	OBJ38812_TMT10_p2.txt_1	127N	A0A0R4J0H8_MOUSE|A0A0R4J0H8	15.1365	KO_Early_3	KO_Early	NA	Model	NA	NA	Model	36018.7	352067	0.102306
OBJ38812_TMT10_p2.txt	1	OBJ38812_TMT10_p2.txt_1	130N	A0A0R4J0H8_MOUSE|A0A0R4J0H8	15.0966	KO_Early_4	KO_Early	NA	Model	NA	NA	Model	35036.6	352067	0.0995169
OBJ38812_TMT10_p2.txt	1	OBJ38812_TMT10_p2.txt_1	128N	A0A0R4J0H8_MOUSE|A0A0R4J0H8	15.1847	KO_Late_3	KO_Late	NA	Model	NA	NA	Model	37244.5	352067	0.105788
OBJ38812_TMT10_p2.txt	1	OBJ38812_TMT10_p2.txt_1	131N	A0A0R4J0H8_MOUSE|A0A0R4J0H8	14.8497	KO_Late_4	KO_Late	NA	Model	NA	NA	Model	29526	352067	0.0838647
OBJ38812_TMT10_p2.txt	1	OBJ38812_TMT10_p2.txt_1	129N	A0A0R4J0H8_MOUSE|A0A0R4J0H8	14.8196	KO_Uninfect_3	KO_Uninfect	NA	Model	NA	NA	Model	28916.3	352067	0.0821329
OBJ38812_TMT10_p2.txt	1	OBJ38812_TMT10_p2.txt_1	126C	A0A0R4J0H8_MOUSE|A0A0R4J0H8	14.5483	WT_Early_3	WT_Early	NA	Model	NA	NA	Model	23959.7	352067	0.0680545
OBJ38812_TMT10_p2.txt	1	OBJ38812_TMT10_p2.txt_1	129C	A0A0R4J0H8_MOUSE|A0A0R4J0H8	14.6731	WT_Early_4	WT_Early	NA	Model	NA	NA	Model	26125	352067	0.0742046
OBJ38812_TMT10_p2.txt	1	OBJ38812_TMT10_p2.txt_1	127C	A0A0R4J0H8_MOUSE|A0A0R4J0H8	14.6063	WT_Late_3	WT_Late	NA	Model	NA	NA	Model	24942.6	352067	0.0708461
OBJ38812_TMT10_p2.txt	1	OBJ38812_TMT10_p2.txt_1	130C	A0A0R4J0H8_MOUSE|A0A0R4J0H8	14.3638	WT_Late_4	WT_Late	NA	Model	NA	NA	Model	21082.7	352067	0.0598825
OBJ38812_TMT10_p2.txt	1	OBJ38812_TMT10_p2.txt_1	128C	A0A0R4J0H8_MOUSE|A0A0R4J0H8	14.9041	WT_Uninfect_3	WT_Uninfect	NA	Model	NA	NA	Model	30660.5	352067	0.087087
OBJ38812_TMT10_p2.txt	1	OBJ38812_TMT10_p2.txt_1	131C	A0A0R4J0H8_MOUSE|A0A0R4J0H8	14.8565	WT_Uninfect_4	WT_Uninfect	NA	Model	NA	NA	Model	29664.8	352067	0.0842589
OBJ38812_TMT10.txt	1	OBJ38812_TMT10.txt_1	127N	A0A0R4J0H8_MOUSE|A0A0R4J0H8	14.7235	KO_Early_1	KO_Early	NA	Model	NA	NA	Model	27052.6	355849	0.0760227
OBJ38812_TMT10.txt	1	OBJ38812_TMT10.txt_1	130N	A0A0R4J0H8_MOUSE|A0A0R4J0H8	14.7915	KO_Early_2	KO_Early	NA	Model	NA	NA	Model	28358.2	355849	0.0796916
OBJ38812_TMT10.txt	1	OBJ38812_TMT10.txt_1	128N	A0A0R4J0H8_MOUSE|A0A0R4J0H8	15.111	KO_Late_1	KO_Late	NA	Model	NA	NA	Model	35388.9	355849	0.0994492
OBJ38812_TMT10.txt	1	OBJ38812_TMT10.txt_1	131N	A0A0R4J0H8_MOUSE|A0A0R4J0H8	15.3487	KO_Late_2	KO_Late	NA	Model	NA	NA	Model	41728.1	355849	0.117264
OBJ38812_TMT10.txt	1	OBJ38812_TMT10.txt_1	129N	A0A0R4J0H8_MOUSE|A0A0R4J0H8	15.1696	KO_Uninfect_1	KO_Uninfect	NA	Model	NA	NA	Model	36854.9	355849	0.103569
OBJ38812_TMT10.txt	1	OBJ38812_TMT10.txt_1	131C	A0A0R4J0H8_MOUSE|A0A0R4J0H8	14.9777	KO_Uninfect_2	KO_Uninfect	NA	Model	NA	NA	Model	32265.8	355849	0.0906727
OBJ38812_TMT10.txt	1	OBJ38812_TMT10.txt_1	126C	A0A0R4J0H8_MOUSE|A0A0R4J0H8	14.7653	WT_Early_1	WT_Early	NA	Model	NA	NA	Model	27849.2	355849	0.0782613
OBJ38812_TMT10.txt	1	OBJ38812_TMT10.txt_1	129C	A0A0R4J0H8_MOUSE|A0A0R4J0H8	14.5865	WT_Early_2	WT_Early	NA	Model	NA	NA	Model	24602.5	355849	0.0691374
OBJ38812_TMT10.txt	1	OBJ38812_TMT10.txt_1	127C	A0A0R4J0H8_MOUSE|A0A0R4J0H8	14.7406	WT_Late_1	WT_Late	NA	Model	NA	NA	Model	27374.9	355849	0.0769284
OBJ38812_TMT10.txt	1	OBJ38812_TMT10.txt_1	130C	A0A0R4J0H8_MOUSE|A0A0R4J0H8	14.4866	WT_Late_2	WT_Late	NA	Model	NA	NA	Model	22956.4	355849	0.0645116
OBJ38812_TMT10.txt	1	OBJ38812_TMT10.txt_1	128C	A0A0R4J0H8_MOUSE|A0A0R4J0H8	14.4594	WT_Uninfect_1	WT_Uninfect	NA	Model	NA	NA	Model	22527.7	355849	0.063307
OBJ38812_TMT10_p2.txt	1	OBJ38812_TMT10_p2.txt_1	127N	A0A0R4J0K5_MOUSE|A0A0R4J0K5	14.7628	KO_Early_3	KO_Early	NA	Model	NA	NA	Model	27801	261878	0.10616
OBJ38812_TMT10_p2.txt	1	OBJ38812_TMT10_p2.txt_1	130N	A0A0R4J0K5_MOUSE|A0A0R4J0K5	14.4575	KO_Early_4	KO_Early	NA	Model	NA	NA	Model	22498.1	261878	0.0859106
OBJ38812_TMT10_p2.txt	1	OBJ38812_TMT10_p2.txt_1	128N	A0A0R4J0K5_MOUSE|A0A0R4J0K5	14.8786	KO_Late_3	KO_Late	NA	Model	NA	NA	Model	30122.7	261878	0.115026
OBJ38812_TMT10_p2.txt	1	OBJ38812_TMT10_p2.txt_1	131N	A0A0R4J0K5_MOUSE|A0A0R4J0K5	14.6252	KO_Late_4	KO_Late	NA	Model	NA	NA	Model	25271.1	261878	0.0964994
OBJ38812_TMT10_p2.txt	1	OBJ38812_TMT10_p2.txt_1	129N	A0A0R4J0K5_MOUSE|A0A0R4J0K5	13.9909	KO_Uninfect_3	KO_Uninfect	NA	Model	NA	NA	Model	16281	261878	0.0621703
OBJ38812_TMT10_p2.txt	1	OBJ38812_TMT10_p2.txt_1	126C	A0A0R4J0K5_MOUSE|A0A0R4J0K5	14.1821	WT_Early_3	WT_Early	NA	Model	NA	NA	Model	18587.6	261878	0.070978
OBJ38812_TMT10_p2.txt	1	OBJ38812_TMT10_p2.txt_1	129C	A0A0R4J0K5_MOUSE|A0A0R4J0K5	14.1233	WT_Early_4	WT_Early	NA	Model	NA	NA	Model	17846.3	261878	0.0681474
OBJ38812_TMT10_p2.txt	1	OBJ38812_TMT10_p2.txt_1	127C	A0A0R4J0K5_MOUSE|A0A0R4J0K5	13.8529	WT_Late_3	WT_Late	NA	Model	NA	NA	Model	14795.9	261878	0.0564991
OBJ38812_TMT10_p2.txt	1	OBJ38812_TMT10_p2.txt_1	130C	A0A0R4J0K5_MOUSE|A0A0R4J0K5	14.2846	WT_Late_4	WT_Late	NA	Model	NA	NA	Model	19956.8	261878	0.0762065
OBJ38812_TMT10_p2.txt	1	OBJ38812_TMT10_p2.txt_1	128C	A0A0R4J0K5_MOUSE|A0A0R4J0K5	14.2353	WT_Uninfect_3	WT_Uninfect	NA	Model	NA	NA	Model	19286.7	261878	0.0736476
OBJ38812_TMT10_p2.txt	1	OBJ38812_TMT10_p2.txt_1	131C	A0A0R4J0K5_MOUSE|A0A0R4J0K5	14.8089	WT_Uninfect_4	WT_Uninfect	NA	Model	NA	NA	Model	28702.5	261878	0.109603
OBJ38812_TMT10.txt	1	OBJ38812_TMT10.txt_1	127N	A0A0R4J0K5_MOUSE|A0A0R4J0K5	14.4175	KO_Early_1	KO_Early	NA	Model	NA	NA	Model	21881.9	265051	0.0825574
OBJ38812_TMT10.txt	1	OBJ38812_TMT10.txt_1	130N	A0A0R4J0K5_MOUSE|A0A0R4J0K5	14.5257	KO_Early_2	KO_Early	NA	Model	NA	NA	Model	23586.7	265051	0.0889895
OBJ38812_TMT10.txt	1	OBJ38812_TMT10.txt_1	128N	A0A0R4J0K5_MOUSE|A0A0R4J0K5	14.8536	KO_Late_1	KO_Late	NA	Model	NA	NA	Model	29605.8	265051	0.111698
OBJ38812_TMT10.txt	1	OBJ38812_TMT10.txt_1	131N	A0A0R4J0K5_MOUSE|A0A0R4J0K5	14.5129	KO_Late_2	KO_Late	NA	Model	NA	NA	Model	23378.5	265051	0.0882037
OBJ38812_TMT10.txt	1	OBJ38812_TMT10.txt_1	129N	A0A0R4J0K5_MOUSE|A0A0R4J0K5	14.5091	KO_Uninfect_1	KO_Uninfect	NA	Model	NA	NA	Model	23317.2	265051	0.0879726
OBJ38812_TMT10.txt	1	OBJ38812_TMT10.txt_1	131C	A0A0R4J0K5_MOUSE|A0A0R4J0K5	15.0449	KO_Uninfect_2	KO_Uninfect	NA	Model	NA	NA	Model	33804.8	265051	0.127541
OBJ38812_TMT10.txt	1	OBJ38812_TMT10.txt_1	126C	A0A0R4J0K5_MOUSE|A0A0R4J0K5	14.108	WT_Early_1	WT_Early	NA	Model	NA	NA	Model	17657.4	265051	0.0666188
OBJ38812_TMT10.txt	1	OBJ38812_TMT10.txt_1	129C	A0A0R4J0K5_MOUSE|A0A0R4J0K5	14.1849	WT_Early_2	WT_Early	NA	Model	NA	NA	Model	18624.8	265051	0.0702688
OBJ38812_TMT10.txt	1	OBJ38812_TMT10.txt_1	127C	A0A0R4J0K5_MOUSE|A0A0R4J0K5	14.1003	WT_Late_1	WT_Late	NA	Model	NA	NA	Model	17564.1	265051	0.066267
OBJ38812_TMT10.txt	1	OBJ38812_TMT10.txt_1	130C	A0A0R4J0K5_MOUSE|A0A0R4J0K5	14.0581	WT_Late_2	WT_Late	NA	Model	NA	NA	Model	17057.4	265051	0.0643551
OBJ38812_TMT10.txt	1	OBJ38812_TMT10.txt_1	128C	A0A0R4J0K5_MOUSE|A0A0R4J0K5	14.1231	WT_Uninfect_1	WT_Uninfect	NA	Model	NA	NA	Model	17843.9	265051	0.0673225
OBJ38812_TMT10_p2.txt	1	OBJ38812_TMT10_p2.txt_1	127N	A0A0R4J0L5_MOUSE|A0A0R4J0L5	15.732	KO_Early_3	KO_Early	NA	Model	NA	NA	Model	54427.4	640497	0.0849768
OBJ38812_TMT10_p2.txt	1	OBJ38812_TMT10_p2.txt_1	130N	A0A0R4J0L5_MOUSE|A0A0R4J0L5	16.092	KO_Early_4	KO_Early	NA	Model	NA	NA	Model	69853.7	640497	0.109062
OBJ38812_TMT10_p2.txt	1	OBJ38812_TMT10_p2.txt_1	128N	A0A0R4J0L5_MOUSE|A0A0R4J0L5	15.7061	KO_Late_3	KO_Late	NA	Model	NA	NA	Model	53458.3	640497	0.0834638
OBJ38812_TMT10_p2.txt	1	OBJ38812_TMT10_p2.txt_1	131N	A0A0R4J0L5_MOUSE|A0A0R4J0L5	15.8674	KO_Late_4	KO_Late	NA	Model	NA	NA	Model	59782.5	640497	0.0933376
OBJ38812_TMT10_p2.txt	1	OBJ38812_TMT10_p2.txt_1	129N	A0A0R4J0L5_MOUSE|A0A0R4J0L5	16.025	KO_Uninfect_3	KO_Uninfect	NA	Model	NA	NA	Model	66681	640497	0.104108
OBJ38812_TMT10_p2.txt	1	OBJ38812_TMT10_p2.txt_1	126C	A0A0R4J0L5_MOUSE|A0A0R4J0L5	15.2966	WT_Early_3	WT_Early	NA	Model	NA	NA	Model	40248.5	640497	0.0628395
OBJ38812_TMT10_p2.txt	1	OBJ38812_TMT10_p2.txt_1	129C	A0A0R4J0L5_MOUSE|A0A0R4J0L5	15.4038	WT_Early_4	WT_Early	NA	Model	NA	NA	Model	43351.3	640497	0.0676838
OBJ38812_TMT10_p2.txt	1	OBJ38812_TMT10_p2.txt_1	127C	A0A0R4J0L5_MOUSE|A0A0R4J0L5	15.2343	WT_Late_3	WT_Late	NA	Model	NA	NA	Model	38546.1	640497	0.0601815
OBJ38812_TMT10_p2.txt	1	OBJ38812_TMT10_p2.txt_1	130C	A0A0R4J0L5_MOUSE|A0A0R4J0L5	15.2735	WT_Late_4	WT_Late	NA	Model	NA	NA	Model	39606.8	640497	0.0618376
OBJ38812_TMT10_p2.txt	1	OBJ38812_TMT10_p2.txt_1	128C	A0A0R4J0L5_MOUSE|A0A0R4J0L5	15.8952	WT_Uninfect_3	WT_Uninfect	NA	Model	NA	NA	Model	60942.9	640497	0.0951494
OBJ38812_TMT10_p2.txt	1	OBJ38812_TMT10_p2.txt_1	131C	A0A0R4J0L5_MOUSE|A0A0R4J0L5	15.922	WT_Uninfect_4	WT_Uninfect	NA	Model	NA	NA	Model	62087.6	640497	0.0969365
OBJ38812_TMT10_p2.txt	1	OBJ38812_TMT10_p2.txt_1	127N	A0A0R4J0M1_MOUSE|A0A0R4J0M1	15.7719	KO_Early_3	KO_Early	NA	Model	NA	NA	Model	55953.8	715658	0.0781852
OBJ38812_TMT10_p2.txt	1	OBJ38812_TMT10_p2.txt_1	130N	A0A0R4J0M1_MOUSE|A0A0R4J0M1	15.9256	KO_Early_4	KO_Early	NA	Model	NA	NA	Model	62242.6	715658	0.0869725
OBJ38812_TMT10_p2.txt	1	OBJ38812_TMT10_p2.txt_1	128N	A0A0R4J0M1_MOUSE|A0A0R4J0M1	15.6192	KO_Late_3	KO_Late	NA	Model	NA	NA	Model	50333.6	715658	0.0703319
OBJ38812_TMT10_p2.txt	1	OBJ38812_TMT10_p2.txt_1	131N	A0A0R4J0M1_MOUSE|A0A0R4J0M1	15.5692	KO_Late_4	KO_Late	NA	Model	NA	NA	Model	48619.5	715658	0.0679368
OBJ38812_TMT10_p2.txt	1	OBJ38812_TMT10_p2.txt_1	129N	A0A0R4J0M1_MOUSE|A0A0R4J0M1	16.0424	KO_Uninfect_3	KO_Uninfect	NA	Model	NA	NA	Model	67491.8	715658	0.0943074
OBJ38812_TMT10_p2.txt	1	OBJ38812_TMT10_p2.txt_1	126C	A0A0R4J0M1_MOUSE|A0A0R4J0M1	16.1944	WT_Early_3	WT_Early	NA	Model	NA	NA	Model	74987.6	715658	0.104781
OBJ38812_TMT10_p2.txt	1	OBJ38812_TMT10_p2.txt_1	129C	A0A0R4J0M1_MOUSE|A0A0R4J0M1	15.9184	WT_Early_4	WT_Early	NA	Model	NA	NA	Model	61933	715658	0.0865399
OBJ38812_TMT10_p2.txt	1	OBJ38812_TMT10_p2.txt_1	127C	A0A0R4J0M1_MOUSE|A0A0R4J0M1	15.8493	WT_Late_3	WT_Late	NA	Model	NA	NA	Model	59037.2	715658	0.0824937
OBJ38812_TMT10_p2.txt	1	OBJ38812_TMT10_p2.txt_1	130C	A0A0R4J0M1_MOUSE|A0A0R4J0M1	15.8739	WT_Late_4	WT_Late	NA	Model	NA	NA	Model	60052.6	715658	0.0839124
OBJ38812_TMT10_p2.txt	1	OBJ38812_TMT10_p2.txt_1	128C	A0A0R4J0M1_MOUSE|A0A0R4J0M1	15.5343	WT_Uninfect_3	WT_Uninfect	NA	Model	NA	NA	Model	47456.5	715658	0.0663117
OBJ38812_TMT10_p2.txt	1	OBJ38812_TMT10_p2.txt_1	131C	A0A0R4J0M1_MOUSE|A0A0R4J0M1	16.0806	WT_Uninfect_4	WT_Uninfect	NA	Model	NA	NA	Model	69303	715658	0.0968381
OBJ38812_TMT10_p2.txt	1	OBJ38812_TMT10_p2.txt_1	127N	A0A0R4J0S4_MOUSE|A0A0R4J0S4	16.7607	KO_Early_3	KO_Early	NA	Model	NA	NA	Model	111036	1.61301e+06	0.0688375
OBJ38812_TMT10_p2.txt	1	OBJ38812_TMT10_p2.txt_1	130N	A0A0R4J0S4_MOUSE|A0A0R4J0S4	16.9046	KO_Early_4	KO_Early	NA	Model	NA	NA	Model	122683	1.61301e+06	0.0760583
OBJ38812_TMT10_p2.txt	1	OBJ38812_TMT10_p2.txt_1	128N	A0A0R4J0S4_MOUSE|A0A0R4J0S4	16.9094	KO_Late_3	KO_Late	NA	Model	NA	NA	Model	123092	1.61301e+06	0.0763121
OBJ38812_TMT10_p2.txt	1	OBJ38812_TMT10_p2.txt_1	131N	A0A0R4J0S4_MOUSE|A0A0R4J0S4	16.9362	KO_Late_4	KO_Late	NA	Model	NA	NA	Model	125399	1.61301e+06	0.0777423
OBJ38812_TMT10_p2.txt	1	OBJ38812_TMT10_p2.txt_1	129N	A0A0R4J0S4_MOUSE|A0A0R4J0S4	17.327	KO_Uninfect_3	KO_Uninfect	NA	Model	NA	NA	Model	164421	1.61301e+06	0.101934
OBJ38812_TMT10_p2.txt	1	OBJ38812_TMT10_p2.txt_1	126C	A0A0R4J0S4_MOUSE|A0A0R4J0S4	16.7547	WT_Early_3	WT_Early	NA	Model	NA	NA	Model	110575	1.61301e+06	0.0685522
OBJ38812_TMT10_p2.txt	1	OBJ38812_TMT10_p2.txt_1	129C	A0A0R4J0S4_MOUSE|A0A0R4J0S4	16.8923	WT_Early_4	WT_Early	NA	Model	NA	NA	Model	121647	1.61301e+06	0.0754162
OBJ38812_TMT10_p2.txt	1	OBJ38812_TMT10_p2.txt_1	127C	A0A0R4J0S4_MOUSE|A0A0R4J0S4	17.0789	WT_Late_3	WT_Late	NA	Model	NA	NA	Model	138445	1.61301e+06	0.08583
OBJ38812_TMT10_p2.txt	1	OBJ38812_TMT10_p2.txt_1	130C	A0A0R4J0S4_MOUSE|A0A0R4J0S4	17	WT_Late_4	WT_Late	NA	Model	NA	NA	Model	131072	1.61301e+06	0.0812594
OBJ38812_TMT10_p2.txt	1	OBJ38812_TMT10_p2.txt_1	128C	A0A0R4J0S4_MOUSE|A0A0R4J0S4	17.1876	WT_Uninfect_3	WT_Uninfect	NA	Model	NA	NA	Model	149269	1.61301e+06	0.0925405
OBJ38812_TMT10_p2.txt	1	OBJ38812_TMT10_p2.txt_1	131C	A0A0R4J0S4_MOUSE|A0A0R4J0S4	17.5091	WT_Uninfect_4	WT_Uninfect	NA	Model	NA	NA	Model	186539	1.61301e+06	0.115646
OBJ38812_TMT10_p2.txt	1	OBJ38812_TMT10_p2.txt_1	127N	A0A0R4J0T2_MOUSE|A0A0R4J0T2	14.4048	KO_Early_3	KO_Early	NA	Model	NA	NA	Model	21690.5	324025	0.0669409
OBJ38812_TMT10_p2.txt	1	OBJ38812_TMT10_p2.txt_1	130N	A0A0R4J0T2_MOUSE|A0A0R4J0T2	14.4605	KO_Early_4	KO_Early	NA	Model	NA	NA	Model	22544.8	324025	0.0695774
OBJ38812_TMT10_p2.txt	1	OBJ38812_TMT10_p2.txt_1	128N	A0A0R4J0T2_MOUSE|A0A0R4J0T2	14.644	KO_Late_3	KO_Late	NA	Model	NA	NA	Model	25601.8	324025	0.0790117
OBJ38812_TMT10_p2.txt	1	OBJ38812_TMT10_p2.txt_1	131N	A0A0R4J0T2_MOUSE|A0A0R4J0T2	14.6495	KO_Late_4	KO_Late	NA	Model	NA	NA	Model	25700.9	324025	0.0793176
OBJ38812_TMT10_p2.txt	1	OBJ38812_TMT10_p2.txt_1	129N	A0A0R4J0T2_MOUSE|A0A0R4J0T2	14.2178	KO_Uninfect_3	KO_Uninfect	NA	Model	NA	NA	Model	19053.4	324025	0.0588022
OBJ38812_TMT10_p2.txt	1	OBJ38812_TMT10_p2.txt_1	126C	A0A0R4J0T2_MOUSE|A0A0R4J0T2	14.9411	WT_Early_3	WT_Early	NA	Model	NA	NA	Model	31457.3	324025	0.0970831
OBJ38812_TMT10_p2.txt	1	OBJ38812_TMT10_p2.txt_1	129C	A0A0R4J0T2_MOUSE|A0A0R4J0T2	14.5521	WT_Early_4	WT_Early	NA	Model	NA	NA	Model	24022.5	324025	0.0741379
OBJ38812_TMT10_p2.txt	1	OBJ38812_TMT10_p2.txt_1	127C	A0A0R4J0T2_MOUSE|A0A0R4J0T2	14.7703	WT_Late_3	WT_Late	NA	Model	NA	NA	Model	27944.3	324025	0.0862412
OBJ38812_TMT10_p2.txt	1	OBJ38812_TMT10_p2.txt_1	130C	A0A0R4J0T2_MOUSE|A0A0R4J0T2	14.4495	WT_Late_4	WT_Late	NA	Model	NA	NA	Model	22374.1	324025	0.0690506
OBJ38812_TMT10_p2.txt	1	OBJ38812_TMT10_p2.txt_1	128C	A0A0R4J0T2_MOUSE|A0A0R4J0T2	15.2795	WT_Uninfect_3	WT_Uninfect	NA	Model	NA	NA	Model	39773.7	324025	0.122749
OBJ38812_TMT10_p2.txt	1	OBJ38812_TMT10_p2.txt_1	131C	A0A0R4J0T2_MOUSE|A0A0R4J0T2	15.2282	WT_Uninfect_4	WT_Uninfect	NA	Model	NA	NA	Model	38384.6	324025	0.118462
OBJ38812_TMT10_p2.txt	1	OBJ38812_TMT10_p2.txt_1	127N	A0A0R4J101_MOUSE|A0A0R4J101	14.1259	KO_Early_3	KO_Early	NA	Model	NA	NA	Model	17877.7	210830	0.0847967
OBJ38812_TMT10_p2.txt	1	OBJ38812_TMT10_p2.txt_1	130N	A0A0R4J101_MOUSE|A0A0R4J101	14.1906	KO_Early_4	KO_Early	NA	Model	NA	NA	Model	18698	210830	0.0886879
OBJ38812_TMT10_p2.txt	1	OBJ38812_TMT10_p2.txt_1	128N	A0A0R4J101_MOUSE|A0A0R4J101	14.1232	KO_Late_3	KO_Late	NA	Model	NA	NA	Model	17844.3	210830	0.0846386
OBJ38812_TMT10_p2.txt	1	OBJ38812_TMT10_p2.txt_1	131N	A0A0R4J101_MOUSE|A0A0R4J101	14.2203	KO_Late_4	KO_Late	NA	Model	NA	NA	Model	19086.7	210830	0.0905312
OBJ38812_TMT10_p2.txt	1	OBJ38812_TMT10_p2.txt_1	129N	A0A0R4J101_MOUSE|A0A0R4J101	13.815	KO_Uninfect_3	KO_Uninfect	NA	Model	NA	NA	Model	14412.3	210830	0.0683601
OBJ38812_TMT10_p2.txt	1	OBJ38812_TMT10_p2.txt_1	126C	A0A0R4J101_MOUSE|A0A0R4J101	14.1444	WT_Early_3	WT_Early	NA	Model	NA	NA	Model	18108.4	210830	0.0858911
OBJ38812_TMT10_p2.txt	1	OBJ38812_TMT10_p2.txt_1	129C	A0A0R4J101_MOUSE|A0A0R4J101	13.6951	WT_Early_4	WT_Early	NA	Model	NA	NA	Model	13262.6	210830	0.0629068
OBJ38812_TMT10_p2.txt	1	OBJ38812_TMT10_p2.txt_1	127C	A0A0R4J101_MOUSE|A0A0R4J101	13.6803	WT_Late_3	WT_Late	NA	Model	NA	NA	Model	13127.8	210830	0.0622674
OBJ38812_TMT10_p2.txt	1	OBJ38812_TMT10_p2.txt_1	130C	A0A0R4J101_MOUSE|A0A0R4J101	13.7435	WT_Late_4	WT_Late	NA	Model	NA	NA	Model	13715.1	210830	0.0650532
OBJ38812_TMT10_p2.txt	1	OBJ38812_TMT10_p2.txt_1	128C	A0A0R4J101_MOUSE|A0A0R4J101	14.4443	WT_Uninfect_3	WT_Uninfect	NA	Model	NA	NA	Model	22293.3	210830	0.105741
OBJ38812_TMT10_p2.txt	1	OBJ38812_TMT10_p2.txt_1	131C	A0A0R4J101_MOUSE|A0A0R4J101	14.6557	WT_Uninfect_4	WT_Uninfect	NA	Model	NA	NA	Model	25810.7	210830	0.122424
OBJ38812_TMT10_p2.txt	1	OBJ38812_TMT10_p2.txt_1	127N	A0A0R4J1R7_MOUSE|A0A0R4J1R7	15.2335	KO_Early_3	KO_Early	NA	Model	NA	NA	Model	38525.7	312340	0.123346
OBJ38812_TMT10_p2.txt	1	OBJ38812_TMT10_p2.txt_1	130N	A0A0R4J1R7_MOUSE|A0A0R4J1R7	14.7538	KO_Early_4	KO_Early	NA	Model	NA	NA	Model	27627.5	312340	0.0884534
OBJ38812_TMT10_p2.txt	1	OBJ38812_TMT10_p2.txt_1	128N	A0A0R4J1R7_MOUSE|A0A0R4J1R7	14.7853	KO_Late_3	KO_Late	NA	Model	NA	NA	Model	28236.6	312340	0.0904036
OBJ38812_TMT10_p2.txt	1	OBJ38812_TMT10_p2.txt_1	131N	A0A0R4J1R7_MOUSE|A0A0R4J1R7	14.8219	KO_Late_4	KO_Late	NA	Model	NA	NA	Model	28961.8	312340	0.0927254
OBJ38812_TMT10_p2.txt	1	OBJ38812_TMT10_p2.txt_1	129N	A0A0R4J1R7_MOUSE|A0A0R4J1R7	15.0356	KO_Uninfect_3	KO_Uninfect	NA	Model	NA	NA	Model	33587.7	312340	0.107536
OBJ38812_TMT10_p2.txt	1	OBJ38812_TMT10_p2.txt_1	126C	A0A0R4J1R7_MOUSE|A0A0R4J1R7	14.4768	WT_Early_3	WT_Early	NA	Model	NA	NA	Model	22801	312340	0.0730006
OBJ38812_TMT10_p2.txt	1	OBJ38812_TMT10_p2.txt_1	129C	A0A0R4J1R7_MOUSE|A0A0R4J1R7	14.4039	WT_Early_4	WT_Early	NA	Model	NA	NA	Model	21677	312340	0.0694018
OBJ38812_TMT10_p2.txt	1	OBJ38812_TMT10_p2.txt_1	127C	A0A0R4J1R7_MOUSE|A0A0R4J1R7	14.1192	WT_Late_3	WT_Late	NA	Model	NA	NA	Model	17795.8	312340	0.0569757
OBJ38812_TMT10_p2.txt	1	OBJ38812_TMT10_p2.txt_1	130C	A0A0R4J1R7_MOUSE|A0A0R4J1R7	14.0421	WT_Late_4	WT_Late	NA	Model	NA	NA	Model	16869.4	312340	0.0540096
OBJ38812_TMT10_p2.txt	1	OBJ38812_TMT10_p2.txt_1	128C	A0A0R4J1R7_MOUSE|A0A0R4J1R7	14.7661	WT_Uninfect_3	WT_Uninfect	NA	Model	NA	NA	Model	27864	312340	0.0892107
OBJ38812_TMT10_p2.txt	1	OBJ38812_TMT10_p2.txt_1	131C	A0A0R4J1R7_MOUSE|A0A0R4J1R7	14.4763	WT_Uninfect_4	WT_Uninfect	NA	Model	NA	NA	Model	22793.7	312340	0.0729772
OBJ38812_TMT10.txt	1	OBJ38812_TMT10.txt_1	127N	A0A0R4J1R7_MOUSE|A0A0R4J1R7	14.5933	KO_Early_1	KO_Early	NA	Model	NA	NA	Model	24718	307891	0.0802814
OBJ38812_TMT10.txt	1	OBJ38812_TMT10.txt_1	130N	A0A0R4J1R7_MOUSE|A0A0R4J1R7	14.7756	KO_Early_2	KO_Early	NA	Model	NA	NA	Model	28048.2	307891	0.0910977
OBJ38812_TMT10.txt	1	OBJ38812_TMT10.txt_1	128N	A0A0R4J1R7_MOUSE|A0A0R4J1R7	14.6048	KO_Late_1	KO_Late	NA	Model	NA	NA	Model	24916.3	307891	0.0809256
OBJ38812_TMT10.txt	1	OBJ38812_TMT10.txt_1	131N	A0A0R4J1R7_MOUSE|A0A0R4J1R7	14.632	KO_Late_2	KO_Late	NA	Model	NA	NA	Model	25390.6	307891	0.082466
OBJ38812_TMT10.txt	1	OBJ38812_TMT10.txt_1	129N	A0A0R4J1R7_MOUSE|A0A0R4J1R7	14.7836	KO_Uninfect_1	KO_Uninfect	NA	Model	NA	NA	Model	28202.8	307891	0.0915999
OBJ38812_TMT10.txt	1	OBJ38812_TMT10.txt_1	131C	A0A0R4J1R7_MOUSE|A0A0R4J1R7	14.6306	KO_Uninfect_2	KO_Uninfect	NA	Model	NA	NA	Model	25365.7	307891	0.0823851
OBJ38812_TMT10.txt	1	OBJ38812_TMT10.txt_1	126C	A0A0R4J1R7_MOUSE|A0A0R4J1R7	14.5425	WT_Early_1	WT_Early	NA	Model	NA	NA	Model	23862.7	307891	0.0775037
OBJ38812_TMT10.txt	1	OBJ38812_TMT10.txt_1	129C	A0A0R4J1R7_MOUSE|A0A0R4J1R7	14.6064	WT_Early_2	WT_Early	NA	Model	NA	NA	Model	24943.3	307891	0.0810132
OBJ38812_TMT10.txt	1	OBJ38812_TMT10.txt_1	127C	A0A0R4J1R7_MOUSE|A0A0R4J1R7	14.4009	WT_Late_1	WT_Late	NA	Model	NA	NA	Model	21632.1	307891	0.0702588
OBJ38812_TMT10.txt	1	OBJ38812_TMT10.txt_1	130C	A0A0R4J1R7_MOUSE|A0A0R4J1R7	14.6561	WT_Late_2	WT_Late	NA	Model	NA	NA	Model	25817.6	307891	0.0838529
OBJ38812_TMT10.txt	1	OBJ38812_TMT10.txt_1	128C	A0A0R4J1R7_MOUSE|A0A0R4J1R7	14.8433	WT_Uninfect_1	WT_Uninfect	NA	Model	NA	NA	Model	29394.7	307891	0.0954709
OBJ38812_TMT10_p2.txt	1	OBJ38812_TMT10_p2.txt_1	127N	A0A0R4J217_MOUSE|A0A0R4J217	13.4765	KO_Early_3	KO_Early	NA	Model	NA	NA	Model	11398.1	125548	0.0907865
OBJ38812_TMT10_p2.txt	1	OBJ38812_TMT10_p2.txt_1	130N	A0A0R4J217_MOUSE|A0A0R4J217	13.5536	KO_Early_4	KO_Early	NA	Model	NA	NA	Model	12023.5	125548	0.0957679
OBJ38812_TMT10_p2.txt	1	OBJ38812_TMT10_p2.txt_1	128N	A0A0R4J217_MOUSE|A0A0R4J217	13.2602	KO_Late_3	KO_Late	NA	Model	NA	NA	Model	9811.29	125548	0.0781474
OBJ38812_TMT10_p2.txt	1	OBJ38812_TMT10_p2.txt_1	131N	A0A0R4J217_MOUSE|A0A0R4J217	13.5689	KO_Late_4	KO_Late	NA	Model	NA	NA	Model	12152.3	125548	0.0967938
OBJ38812_TMT10_p2.txt	1	OBJ38812_TMT10_p2.txt_1	129N	A0A0R4J217_MOUSE|A0A0R4J217	13.7816	KO_Uninfect_3	KO_Uninfect	NA	Model	NA	NA	Model	14082.6	125548	0.112168
OBJ38812_TMT10_p2.txt	1	OBJ38812_TMT10_p2.txt_1	126C	A0A0R4J217_MOUSE|A0A0R4J217	13.0797	WT_Early_3	WT_Early	NA	Model	NA	NA	Model	8656.99	125548	0.0689534
OBJ38812_TMT10_p2.txt	1	OBJ38812_TMT10_p2.txt_1	129C	A0A0R4J217_MOUSE|A0A0R4J217	12.9463	WT_Early_4	WT_Early	NA	Model	NA	NA	Model	7892.58	125548	0.0628648
OBJ38812_TMT10_p2.txt	1	OBJ38812_TMT10_p2.txt_1	127C	A0A0R4J217_MOUSE|A0A0R4J217	13.2179	WT_Late_3	WT_Late	NA	Model	NA	NA	Model	9527.56	125548	0.0758875
OBJ38812_TMT10_p2.txt	1	OBJ38812_TMT10_p2.txt_1	130C	A0A0R4J217_MOUSE|A0A0R4J217	12.8696	WT_Late_4	WT_Late	NA	Model	NA	NA	Model	7484.26	125548	0.0596125
OBJ38812_TMT10_p2.txt	1	OBJ38812_TMT10_p2.txt_1	128C	A0A0R4J217_MOUSE|A0A0R4J217	13.6109	WT_Uninfect_3	WT_Uninfect	NA	Model	NA	NA	Model	12511.3	125548	0.0996528
OBJ38812_TMT10_p2.txt	1	OBJ38812_TMT10_p2.txt_1	131C	A0A0R4J217_MOUSE|A0A0R4J217	13.2384	WT_Uninfect_4	WT_Uninfect	NA	Model	NA	NA	Model	9663.89	125548	0.0769734
OBJ38812_TMT10_p2.txt	1	OBJ38812_TMT10_p2.txt_1	127N	A0A0U1RP97_MOUSE|A0A0U1RP97	13.2193	KO_Early_3	KO_Early	NA	Model	NA	NA	Model	9536.89	660335	0.0144425
OBJ38812_TMT10_p2.txt	1	OBJ38812_TMT10_p2.txt_1	130N	A0A0U1RP97_MOUSE|A0A0U1RP97	17.1551	KO_Early_4	KO_Early	NA	Model	NA	NA	Model	145945	660335	0.221017
OBJ38812_TMT10_p2.txt	1	OBJ38812_TMT10_p2.txt_1	128N	A0A0U1RP97_MOUSE|A0A0U1RP97	13.104	KO_Late_3	KO_Late	NA	Model	NA	NA	Model	8804.21	660335	0.013333
OBJ38812_TMT10_p2.txt	1	OBJ38812_TMT10_p2.txt_1	131N	A0A0U1RP97_MOUSE|A0A0U1RP97	12.7659	KO_Late_4	KO_Late	NA	Model	NA	NA	Model	6965	660335	0.0105477
OBJ38812_TMT10_p2.txt	1	OBJ38812_TMT10_p2.txt_1	129N	A0A0U1RP97_MOUSE|A0A0U1RP97	14.1025	KO_Uninfect_3	KO_Uninfect	NA	Model	NA	NA	Model	17590.4	660335	0.0266386
OBJ38812_TMT10_p2.txt	1	OBJ38812_TMT10_p2.txt_1	126C	A0A0U1RP97_MOUSE|A0A0U1RP97	15.8167	WT_Early_3	WT_Early	NA	Model	NA	NA	Model	57715.8	660335	0.0874039
OBJ38812_TMT10_p2.txt	1	OBJ38812_TMT10_p2.txt_1	129C	A0A0U1RP97_MOUSE|A0A0U1RP97	16.8851	WT_Early_4	WT_Early	NA	Model	NA	NA	Model	121036	660335	0.183295
OBJ38812_TMT10_p2.txt	1	OBJ38812_TMT10_p2.txt_1	127C	A0A0U1RP97_MOUSE|A0A0U1RP97	14.6311	WT_Late_3	WT_Late	NA	Model	NA	NA	Model	25375	660335	0.0384274
OBJ38812_TMT10_p2.txt	1	OBJ38812_TMT10_p2.txt_1	130C	A0A0U1RP97_MOUSE|A0A0U1RP97	16.0404	WT_Late_4	WT_Late	NA	Model	NA	NA	Model	67398	660335	0.102066
OBJ38812_TMT10_p2.txt	1	OBJ38812_TMT10_p2.txt_1	128C	A0A0U1RP97_MOUSE|A0A0U1RP97	13.367	WT_Uninfect_3	WT_Uninfect	NA	Model	NA	NA	Model	10565	660335	0.0159995
OBJ38812_TMT10_p2.txt	1	OBJ38812_TMT10_p2.txt_1	131C	A0A0U1RP97_MOUSE|A0A0U1RP97	17.3112	WT_Uninfect_4	WT_Uninfect	NA	Model	NA	NA	Model	162627	660335	0.246279
OBJ38812_TMT10_p2.txt	1	OBJ38812_TMT10_p2.txt_1	127N	A0A0U1RPL8_MOUSE|A0A0U1RPL8	16.6772	KO_Early_3	KO_Early	NA	Model	NA	NA	Model	104791	1.29045e+06	0.081205
OBJ38812_TMT10_p2.txt	1	OBJ38812_TMT10_p2.txt_1	130N	A0A0U1RPL8_MOUSE|A0A0U1RPL8	16.6166	KO_Early_4	KO_Early	NA	Model	NA	NA	Model	100481	1.29045e+06	0.0778649
OBJ38812_TMT10_p2.txt	1	OBJ38812_TMT10_p2.txt_1	128N	A0A0U1RPL8_MOUSE|A0A0U1RPL8	16.6925	KO_Late_3	KO_Late	NA	Model	NA	NA	Model	105913	1.29045e+06	0.0820746
OBJ38812_TMT10_p2.txt	1	OBJ38812_TMT10_p2.txt_1	131N	A0A0U1RPL8_MOUSE|A0A0U1RPL8	16.6496	KO_Late_4	KO_Late	NA	Model	NA	NA	Model	102808	1.29045e+06	0.0796679
OBJ38812_TMT10_p2.txt	1	OBJ38812_TMT10_p2.txt_1	129N	A0A0U1RPL8_MOUSE|A0A0U1RPL8	16.4703	KO_Uninfect_3	KO_Uninfect	NA	Model	NA	NA	Model	90790.8	1.29045e+06	0.0703557
OBJ38812_TMT10_p2.txt	1	OBJ38812_TMT10_p2.txt_1	126C	A0A0U1RPL8_MOUSE|A0A0U1RPL8	16.6902	WT_Early_3	WT_Early	NA	Model	NA	NA	Model	105743	1.29045e+06	0.0819424
OBJ38812_TMT10_p2.txt	1	OBJ38812_TMT10_p2.txt_1	129C	A0A0U1RPL8_MOUSE|A0A0U1RPL8	16.7144	WT_Early_4	WT_Early	NA	Model	NA	NA	Model	107530	1.29045e+06	0.0833269
OBJ38812_TMT10_p2.txt	1	OBJ38812_TMT10_p2.txt_1	127C	A0A0U1RPL8_MOUSE|A0A0U1RPL8	16.7377	WT_Late_3	WT_Late	NA	Model	NA	NA	Model	109279	1.29045e+06	0.0846824
OBJ38812_TMT10_p2.txt	1	OBJ38812_TMT10_p2.txt_1	130C	A0A0U1RPL8_MOUSE|A0A0U1RPL8	16.871	WT_Late_4	WT_Late	NA	Model	NA	NA	Model	119857	1.29045e+06	0.0928797
OBJ38812_TMT10_p2.txt	1	OBJ38812_TMT10_p2.txt_1	128C	A0A0U1RPL8_MOUSE|A0A0U1RPL8	16.8019	WT_Uninfect_3	WT_Uninfect	NA	Model	NA	NA	Model	114255	1.29045e+06	0.0885388
OBJ38812_TMT10_p2.txt	1	OBJ38812_TMT10_p2.txt_1	131C	A0A0U1RPL8_MOUSE|A0A0U1RPL8	16.9097	WT_Uninfect_4	WT_Uninfect	NA	Model	NA	NA	Model	123123	1.29045e+06	0.0954105
OBJ38812_TMT10_p2.txt	1	OBJ38812_TMT10_p2.txt_1	127N	A0A0U1RQ65_MOUSE|A0A0U1RQ65	15.2653	KO_Early_3	KO_Early	NA	Model	NA	NA	Model	39384.6	382408	0.102991
OBJ38812_TMT10_p2.txt	1	OBJ38812_TMT10_p2.txt_1	130N	A0A0U1RQ65_MOUSE|A0A0U1RQ65	15.1873	KO_Early_4	KO_Early	NA	Model	NA	NA	Model	37311.9	382408	0.097571
OBJ38812_TMT10_p2.txt	1	OBJ38812_TMT10_p2.txt_1	128N	A0A0U1RQ65_MOUSE|A0A0U1RQ65	15.0335	KO_Late_3	KO_Late	NA	Model	NA	NA	Model	33538.3	382408	0.0877029
OBJ38812_TMT10_p2.txt	1	OBJ38812_TMT10_p2.txt_1	131N	A0A0U1RQ65_MOUSE|A0A0U1RQ65	14.9053	KO_Late_4	KO_Late	NA	Model	NA	NA	Model	30686.1	382408	0.0802443
OBJ38812_TMT10_p2.txt	1	OBJ38812_TMT10_p2.txt_1	129N	A0A0U1RQ65_MOUSE|A0A0U1RQ65	15.0399	KO_Uninfect_3	KO_Uninfect	NA	Model	NA	NA	Model	33687.2	382408	0.0880923
OBJ38812_TMT10_p2.txt	1	OBJ38812_TMT10_p2.txt_1	126C	A0A0U1RQ65_MOUSE|A0A0U1RQ65	14.773	WT_Early_3	WT_Early	NA	Model	NA	NA	Model	27996.8	382408	0.073212
OBJ38812_TMT10_p2.txt	1	OBJ38812_TMT10_p2.txt_1	129C	A0A0U1RQ65_MOUSE|A0A0U1RQ65	14.7559	WT_Early_4	WT_Early	NA	Model	NA	NA	Model	27666.8	382408	0.0723489
OBJ38812_TMT10_p2.txt	1	OBJ38812_TMT10_p2.txt_1	127C	A0A0U1RQ65_MOUSE|A0A0U1RQ65	14.6792	WT_Late_3	WT_Late	NA	Model	NA	NA	Model	26234.3	382408	0.0686029
OBJ38812_TMT10_p2.txt	1	OBJ38812_TMT10_p2.txt_1	130C	A0A0U1RQ65_MOUSE|A0A0U1RQ65	14.7591	WT_Late_4	WT_Late	NA	Model	NA	NA	Model	27729	382408	0.0725115
OBJ38812_TMT10_p2.txt	1	OBJ38812_TMT10_p2.txt_1	128C	A0A0U1RQ65_MOUSE|A0A0U1RQ65	14.9692	WT_Uninfect_3	WT_Uninfect	NA	Model	NA	NA	Model	32074.8	382408	0.0838759
OBJ38812_TMT10_p2.txt	1	OBJ38812_TMT10_p2.txt_1	131C	A0A0U1RQ65_MOUSE|A0A0U1RQ65	15.0841	WT_Uninfect_4	WT_Uninfect	NA	Model	NA	NA	Model	34735.2	382408	0.090833
OBJ38812_TMT10_p2.txt	1	OBJ38812_TMT10_p2.txt_1	127N	A0A140DKP8_MOUSE|A0A140DKP8	13.3984	KO_Early_3	KO_Early	NA	Model	NA	NA	Model	10797.3	202637	0.053284
OBJ38812_TMT10_p2.txt	1	OBJ38812_TMT10_p2.txt_1	130N	A0A140DKP8_MOUSE|A0A140DKP8	13.5351	KO_Early_4	KO_Early	NA	Model	NA	NA	Model	11870.9	202637	0.058582
OBJ38812_TMT10_p2.txt	1	OBJ38812_TMT10_p2.txt_1	128N	A0A140DKP8_MOUSE|A0A140DKP8	13.7553	KO_Late_3	KO_Late	NA	Model	NA	NA	Model	13827.6	202637	0.0682383
OBJ38812_TMT10_p2.txt	1	OBJ38812_TMT10_p2.txt_1	131N	A0A140DKP8_MOUSE|A0A140DKP8	14.0582	KO_Late_4	KO_Late	NA	Model	NA	NA	Model	17058	202637	0.0841802
OBJ38812_TMT10_p2.txt	1	OBJ38812_TMT10_p2.txt_1	129N	A0A140DKP8_MOUSE|A0A140DKP8	13.7303	KO_Uninfect_3	KO_Uninfect	NA	Model	NA	NA	Model	13590.1	202637	0.0670662
OBJ38812_TMT10_p2.txt	1	OBJ38812_TMT10_p2.txt_1	126C	A0A140DKP8_MOUSE|A0A140DKP8	14.2826	WT_Early_3	WT_Early	NA	Model	NA	NA	Model	19929	202637	0.0983485
OBJ38812_TMT10_p2.txt	1	OBJ38812_TMT10_p2.txt_1	129C	A0A140DKP8_MOUSE|A0A140DKP8	14.4657	WT_Early_4	WT_Early	NA	Model	NA	NA	Model	22626.2	202637	0.111659
OBJ38812_TMT10_p2.txt	1	OBJ38812_TMT10_p2.txt_1	127C	A0A140DKP8_MOUSE|A0A140DKP8	14.3581	WT_Late_3	WT_Late	NA	Model	NA	NA	Model	21000	202637	0.103634
OBJ38812_TMT10_p2.txt	1	OBJ38812_TMT10_p2.txt_1	130C	A0A140DKP8_MOUSE|A0A140DKP8	13.9883	WT_Late_4	WT_Late	NA	Model	NA	NA	Model	16252	202637	0.0802028
OBJ38812_TMT10_p2.txt	1	OBJ38812_TMT10_p2.txt_1	128C	A0A140DKP8_MOUSE|A0A140DKP8	13.9247	WT_Uninfect_3	WT_Uninfect	NA	Model	NA	NA	Model	15551.2	202637	0.0767442
OBJ38812_TMT10_p2.txt	1	OBJ38812_TMT10_p2.txt_1	131C	A0A140DKP8_MOUSE|A0A140DKP8	14.5694	WT_Uninfect_4	WT_Uninfect	NA	Model	NA	NA	Model	24312.3	202637	0.11998
OBJ38812_TMT10.txt	1	OBJ38812_TMT10.txt_1	127N	A0A140DKP8_MOUSE|A0A140DKP8	13.7947	KO_Early_1	KO_Early	NA	Model	NA	NA	Model	14210.4	189764	0.0748847
OBJ38812_TMT10.txt	1	OBJ38812_TMT10.txt_1	130N	A0A140DKP8_MOUSE|A0A140DKP8	14.0224	KO_Early_2	KO_Early	NA	Model	NA	NA	Model	16639.9	189764	0.0876878
OBJ38812_TMT10.txt	1	OBJ38812_TMT10.txt_1	128N	A0A140DKP8_MOUSE|A0A140DKP8	13.759	KO_Late_1	KO_Late	NA	Model	NA	NA	Model	13863.4	189764	0.0730561
OBJ38812_TMT10.txt	1	OBJ38812_TMT10.txt_1	131N	A0A140DKP8_MOUSE|A0A140DKP8	13.7147	KO_Late_2	KO_Late	NA	Model	NA	NA	Model	13443.8	189764	0.0708452
OBJ38812_TMT10.txt	1	OBJ38812_TMT10.txt_1	129N	A0A140DKP8_MOUSE|A0A140DKP8	13.9968	KO_Uninfect_1	KO_Uninfect	NA	Model	NA	NA	Model	16348.2	189764	0.0861504
OBJ38812_TMT10.txt	1	OBJ38812_TMT10.txt_1	131C	A0A140DKP8_MOUSE|A0A140DKP8	13.8731	KO_Uninfect_2	KO_Uninfect	NA	Model	NA	NA	Model	15004.3	189764	0.0790686
OBJ38812_TMT10.txt	1	OBJ38812_TMT10.txt_1	126C	A0A140DKP8_MOUSE|A0A140DKP8	14.1227	WT_Early_1	WT_Early	NA	Model	NA	NA	Model	17839	189764	0.0940065
OBJ38812_TMT10.txt	1	OBJ38812_TMT10.txt_1	129C	A0A140DKP8_MOUSE|A0A140DKP8	14.0818	WT_Early_2	WT_Early	NA	Model	NA	NA	Model	17340.4	189764	0.0913788
OBJ38812_TMT10.txt	1	OBJ38812_TMT10.txt_1	127C	A0A140DKP8_MOUSE|A0A140DKP8	13.9581	WT_Late_1	WT_Late	NA	Model	NA	NA	Model	15915.2	189764	0.0838685
OBJ38812_TMT10.txt	1	OBJ38812_TMT10.txt_1	130C	A0A140DKP8_MOUSE|A0A140DKP8	13.9553	WT_Late_2	WT_Late	NA	Model	NA	NA	Model	15884.4	189764	0.0837062
OBJ38812_TMT10.txt	1	OBJ38812_TMT10.txt_1	128C	A0A140DKP8_MOUSE|A0A140DKP8	14.0911	WT_Uninfect_1	WT_Uninfect	NA	Model	NA	NA	Model	17452.3	189764	0.0919684
OBJ38812_TMT10_p2.txt	1	OBJ38812_TMT10_p2.txt_1	127N	A0A140LI34_MOUSE|A0A140LI34	12.8552	KO_Early_3	KO_Early	NA	Model	NA	NA	Model	7409.64	220420	0.033616
OBJ38812_TMT10_p2.txt	1	OBJ38812_TMT10_p2.txt_1	130N	A0A140LI34_MOUSE|A0A140LI34	14.1082	KO_Early_4	KO_Early	NA	Model	NA	NA	Model	17660.6	220420	0.0801225
OBJ38812_TMT10_p2.txt	1	OBJ38812_TMT10_p2.txt_1	128N	A0A140LI34_MOUSE|A0A140LI34	13.0121	KO_Late_3	KO_Late	NA	Model	NA	NA	Model	8260.86	220420	0.0374778
OBJ38812_TMT10_p2.txt	1	OBJ38812_TMT10_p2.txt_1	131N	A0A140LI34_MOUSE|A0A140LI34	13.9623	KO_Late_4	KO_Late	NA	Model	NA	NA	Model	15961.4	220420	0.0724133
OBJ38812_TMT10_p2.txt	1	OBJ38812_TMT10_p2.txt_1	129N	A0A140LI34_MOUSE|A0A140LI34	14.8668	KO_Uninfect_3	KO_Uninfect	NA	Model	NA	NA	Model	29878	220420	0.13555
OBJ38812_TMT10_p2.txt	1	OBJ38812_TMT10_p2.txt_1	126C	A0A140LI34_MOUSE|A0A140LI34	14.7859	WT_Early_3	WT_Early	NA	Model	NA	NA	Model	28249.3	220420	0.128161
OBJ38812_TMT10_p2.txt	1	OBJ38812_TMT10_p2.txt_1	129C	A0A140LI34_MOUSE|A0A140LI34	13.8857	WT_Early_4	WT_Early	NA	Model	NA	NA	Model	15136.2	220420	0.0686697
OBJ38812_TMT10_p2.txt	1	OBJ38812_TMT10_p2.txt_1	127C	A0A140LI34_MOUSE|A0A140LI34	14.2702	WT_Late_3	WT_Late	NA	Model	NA	NA	Model	19759.2	220420	0.0896433
OBJ38812_TMT10_p2.txt	1	OBJ38812_TMT10_p2.txt_1	130C	A0A140LI34_MOUSE|A0A140LI34	13.828	WT_Late_4	WT_Late	NA	Model	NA	NA	Model	14542.2	220420	0.065975
OBJ38812_TMT10_p2.txt	1	OBJ38812_TMT10_p2.txt_1	128C	A0A140LI34_MOUSE|A0A140LI34	12.9745	WT_Uninfect_3	WT_Uninfect	NA	Model	NA	NA	Model	8048.23	220420	0.0365131
OBJ38812_TMT10_p2.txt	1	OBJ38812_TMT10_p2.txt_1	131C	A0A140LI34_MOUSE|A0A140LI34	15.3127	WT_Uninfect_4	WT_Uninfect	NA	Model	NA	NA	Model	40698.4	220420	0.18464
OBJ38812_TMT10.txt	1	OBJ38812_TMT10.txt_1	127N	A0A140LI34_MOUSE|A0A140LI34	14.075	KO_Early_1	KO_Early	NA	Model	NA	NA	Model	17257.9	177422	0.0972707
OBJ38812_TMT10.txt	1	OBJ38812_TMT10.txt_1	130N	A0A140LI34_MOUSE|A0A140LI34	13.846	KO_Early_2	KO_Early	NA	Model	NA	NA	Model	14724.8	177422	0.082993
OBJ38812_TMT10.txt	1	OBJ38812_TMT10.txt_1	128N	A0A140LI34_MOUSE|A0A140LI34	13.7881	KO_Late_1	KO_Late	NA	Model	NA	NA	Model	14145.6	177422	0.0797288
OBJ38812_TMT10.txt	1	OBJ38812_TMT10.txt_1	131N	A0A140LI34_MOUSE|A0A140LI34	13.7326	KO_Late_2	KO_Late	NA	Model	NA	NA	Model	13611.9	177422	0.0767206
OBJ38812_TMT10.txt	1	OBJ38812_TMT10.txt_1	129N	A0A140LI34_MOUSE|A0A140LI34	13.6725	KO_Uninfect_1	KO_Uninfect	NA	Model	NA	NA	Model	13057	177422	0.0735929
OBJ38812_TMT10.txt	1	OBJ38812_TMT10.txt_1	131C	A0A140LI34_MOUSE|A0A140LI34	13.6914	KO_Uninfect_2	KO_Uninfect	NA	Model	NA	NA	Model	13228.7	177422	0.0745606
OBJ38812_TMT10.txt	1	OBJ38812_TMT10.txt_1	126C	A0A140LI34_MOUSE|A0A140LI34	13.7664	WT_Early_1	WT_Early	NA	Model	NA	NA	Model	13934.9	177422	0.0785413
OBJ38812_TMT10.txt	1	OBJ38812_TMT10.txt_1	129C	A0A140LI34_MOUSE|A0A140LI34	14.0507	WT_Early_2	WT_Early	NA	Model	NA	NA	Model	16970	177422	0.0956476
OBJ38812_TMT10.txt	1	OBJ38812_TMT10.txt_1	127C	A0A140LI34_MOUSE|A0A140LI34	14.1	WT_Late_1	WT_Late	NA	Model	NA	NA	Model	17560.5	177422	0.0989758
OBJ38812_TMT10.txt	1	OBJ38812_TMT10.txt_1	130C	A0A140LI34_MOUSE|A0A140LI34	14.0008	WT_Late_2	WT_Late	NA	Model	NA	NA	Model	16392.8	177422	0.0923947
OBJ38812_TMT10.txt	1	OBJ38812_TMT10.txt_1	128C	A0A140LI34_MOUSE|A0A140LI34	13.5169	WT_Uninfect_1	WT_Uninfect	NA	Model	NA	NA	Model	11721.4	177422	0.0660654
OBJ38812_TMT10_p2.txt	1	OBJ38812_TMT10_p2.txt_1	127N	A0A140LJ04_MOUSE|A0A140LJ04	15.8374	KO_Early_3	KO_Early	NA	Model	NA	NA	Model	58549.4	763697	0.0766658
OBJ38812_TMT10_p2.txt	1	OBJ38812_TMT10_p2.txt_1	130N	A0A140LJ04_MOUSE|A0A140LJ04	15.9362	KO_Early_4	KO_Early	NA	Model	NA	NA	Model	62702.2	763697	0.0821035
OBJ38812_TMT10_p2.txt	1	OBJ38812_TMT10_p2.txt_1	128N	A0A140LJ04_MOUSE|A0A140LJ04	15.787	KO_Late_3	KO_Late	NA	Model	NA	NA	Model	56541.1	763697	0.074036
OBJ38812_TMT10_p2.txt	1	OBJ38812_TMT10_p2.txt_1	131N	A0A140LJ04_MOUSE|A0A140LJ04	15.9052	KO_Late_4	KO_Late	NA	Model	NA	NA	Model	61366.8	763697	0.0803549
OBJ38812_TMT10_p2.txt	1	OBJ38812_TMT10_p2.txt_1	129N	A0A140LJ04_MOUSE|A0A140LJ04	15.5864	KO_Uninfect_3	KO_Uninfect	NA	Model	NA	NA	Model	49201.8	763697	0.0644258
OBJ38812_TMT10_p2.txt	1	OBJ38812_TMT10_p2.txt_1	126C	A0A140LJ04_MOUSE|A0A140LJ04	16.0381	WT_Early_3	WT_Early	NA	Model	NA	NA	Model	67287.6	763697	0.0881077
OBJ38812_TMT10_p2.txt	1	OBJ38812_TMT10_p2.txt_1	129C	A0A140LJ04_MOUSE|A0A140LJ04	15.8973	WT_Early_4	WT_Early	NA	Model	NA	NA	Model	61034	763697	0.0799191
OBJ38812_TMT10_p2.txt	1	OBJ38812_TMT10_p2.txt_1	127C	A0A140LJ04_MOUSE|A0A140LJ04	16.021	WT_Late_3	WT_Late	NA	Model	NA	NA	Model	66496.5	763697	0.0870718
OBJ38812_TMT10_p2.txt	1	OBJ38812_TMT10_p2.txt_1	130C	A0A140LJ04_MOUSE|A0A140LJ04	15.8914	WT_Late_4	WT_Late	NA	Model	NA	NA	Model	60783	763697	0.0795904
OBJ38812_TMT10_p2.txt	1	OBJ38812_TMT10_p2.txt_1	128C	A0A140LJ04_MOUSE|A0A140LJ04	16.1864	WT_Uninfect_3	WT_Uninfect	NA	Model	NA	NA	Model	74574.2	763697	0.097649
OBJ38812_TMT10_p2.txt	1	OBJ38812_TMT10_p2.txt_1	131C	A0A140LJ04_MOUSE|A0A140LJ04	16.352	WT_Uninfect_4	WT_Uninfect	NA	Model	NA	NA	Model	83646.3	763697	0.109528
OBJ38812_TMT10.txt	1	OBJ38812_TMT10.txt_1	127N	A0A140LJ04_MOUSE|A0A140LJ04	16.0313	KO_Early_1	KO_Early	NA	Model	NA	NA	Model	66971.6	737044	0.0908651
OBJ38812_TMT10.txt	1	OBJ38812_TMT10.txt_1	130N	A0A140LJ04_MOUSE|A0A140LJ04	16.1454	KO_Early_2	KO_Early	NA	Model	NA	NA	Model	72487.2	737044	0.0983485
OBJ38812_TMT10.txt	1	OBJ38812_TMT10.txt_1	128N	A0A140LJ04_MOUSE|A0A140LJ04	15.9238	KO_Late_1	KO_Late	NA	Model	NA	NA	Model	62163.3	737044	0.0843413
OBJ38812_TMT10.txt	1	OBJ38812_TMT10.txt_1	131N	A0A140LJ04_MOUSE|A0A140LJ04	15.8779	KO_Late_2	KO_Late	NA	Model	NA	NA	Model	60217.9	737044	0.0817019
OBJ38812_TMT10.txt	1	OBJ38812_TMT10.txt_1	129N	A0A140LJ04_MOUSE|A0A140LJ04	16.2439	KO_Uninfect_1	KO_Uninfect	NA	Model	NA	NA	Model	77607.3	737044	0.105295
OBJ38812_TMT10.txt	1	OBJ38812_TMT10.txt_1	131C	A0A140LJ04_MOUSE|A0A140LJ04	15.7618	KO_Uninfect_2	KO_Uninfect	NA	Model	NA	NA	Model	55561.2	737044	0.0753838
OBJ38812_TMT10.txt	1	OBJ38812_TMT10.txt_1	126C	A0A140LJ04_MOUSE|A0A140LJ04	15.6844	WT_Early_1	WT_Early	NA	Model	NA	NA	Model	52659.1	737044	0.0714463
OBJ38812_TMT10.txt	1	OBJ38812_TMT10.txt_1	129C	A0A140LJ04_MOUSE|A0A140LJ04	15.8731	WT_Early_2	WT_Early	NA	Model	NA	NA	Model	60018.6	737044	0.0814315
OBJ38812_TMT10.txt	1	OBJ38812_TMT10.txt_1	127C	A0A140LJ04_MOUSE|A0A140LJ04	15.6377	WT_Late_1	WT_Late	NA	Model	NA	NA	Model	50982.3	737044	0.0691713
OBJ38812_TMT10.txt	1	OBJ38812_TMT10.txt_1	130C	A0A140LJ04_MOUSE|A0A140LJ04	15.8428	WT_Late_2	WT_Late	NA	Model	NA	NA	Model	58771.4	737044	0.0797393
OBJ38812_TMT10.txt	1	OBJ38812_TMT10.txt_1	128C	A0A140LJ04_MOUSE|A0A140LJ04	15.826	WT_Uninfect_1	WT_Uninfect	NA	Model	NA	NA	Model	58090	737044	0.0788148
OBJ38812_TMT10_p2.txt	1	OBJ38812_TMT10_p2.txt_1	127N	A0A1B0GR85_MOUSE|A0A1B0GR85	14.0786	KO_Early_3	KO_Early	NA	Model	NA	NA	Model	17301.2	232700	0.0743495
OBJ38812_TMT10_p2.txt	1	OBJ38812_TMT10_p2.txt_1	130N	A0A1B0GR85_MOUSE|A0A1B0GR85	14.0492	KO_Early_4	KO_Early	NA	Model	NA	NA	Model	16952.7	232700	0.0728521
OBJ38812_TMT10_p2.txt	1	OBJ38812_TMT10_p2.txt_1	128N	A0A1B0GR85_MOUSE|A0A1B0GR85	13.9183	KO_Late_3	KO_Late	NA	Model	NA	NA	Model	15481.6	232700	0.06653
OBJ38812_TMT10_p2.txt	1	OBJ38812_TMT10_p2.txt_1	131N	A0A1B0GR85_MOUSE|A0A1B0GR85	13.962	KO_Late_4	KO_Late	NA	Model	NA	NA	Model	15958.6	232700	0.0685801
OBJ38812_TMT10_p2.txt	1	OBJ38812_TMT10_p2.txt_1	129N	A0A1B0GR85_MOUSE|A0A1B0GR85	14.2396	KO_Uninfect_3	KO_Uninfect	NA	Model	NA	NA	Model	19344.6	232700	0.083131
OBJ38812_TMT10_p2.txt	1	OBJ38812_TMT10_p2.txt_1	126C	A0A1B0GR85_MOUSE|A0A1B0GR85	14.5837	WT_Early_3	WT_Early	NA	Model	NA	NA	Model	24553.8	232700	0.105517
OBJ38812_TMT10_p2.txt	1	OBJ38812_TMT10_p2.txt_1	129C	A0A1B0GR85_MOUSE|A0A1B0GR85	14.4133	WT_Early_4	WT_Early	NA	Model	NA	NA	Model	21818.6	232700	0.0937627
OBJ38812_TMT10_p2.txt	1	OBJ38812_TMT10_p2.txt_1	127C	A0A1B0GR85_MOUSE|A0A1B0GR85	14.3909	WT_Late_3	WT_Late	NA	Model	NA	NA	Model	21482.6	232700	0.0923186
OBJ38812_TMT10_p2.txt	1	OBJ38812_TMT10_p2.txt_1	130C	A0A1B0GR85_MOUSE|A0A1B0GR85	14.2941	WT_Late_4	WT_Late	NA	Model	NA	NA	Model	20088.9	232700	0.0863293
OBJ38812_TMT10_p2.txt	1	OBJ38812_TMT10_p2.txt_1	128C	A0A1B0GR85_MOUSE|A0A1B0GR85	14.0732	WT_Uninfect_3	WT_Uninfect	NA	Model	NA	NA	Model	17236.8	232700	0.0740728
OBJ38812_TMT10_p2.txt	1	OBJ38812_TMT10_p2.txt_1	131C	A0A1B0GR85_MOUSE|A0A1B0GR85	14.53	WT_Uninfect_4	WT_Uninfect	NA	Model	NA	NA	Model	23657	232700	0.101663
OBJ38812_TMT10.txt	1	OBJ38812_TMT10.txt_1	127N	A0A1B0GR85_MOUSE|A0A1B0GR85	14.2328	KO_Early_1	KO_Early	NA	Model	NA	NA	Model	19253.7	225105	0.0855318
OBJ38812_TMT10.txt	1	OBJ38812_TMT10.txt_1	130N	A0A1B0GR85_MOUSE|A0A1B0GR85	13.9748	KO_Early_2	KO_Early	NA	Model	NA	NA	Model	16100.7	225105	0.0715253
OBJ38812_TMT10.txt	1	OBJ38812_TMT10.txt_1	128N	A0A1B0GR85_MOUSE|A0A1B0GR85	14.056	KO_Late_1	KO_Late	NA	Model	NA	NA	Model	17032.1	225105	0.0756627
OBJ38812_TMT10.txt	1	OBJ38812_TMT10.txt_1	131N	A0A1B0GR85_MOUSE|A0A1B0GR85	14.019	KO_Late_2	KO_Late	NA	Model	NA	NA	Model	16601.3	225105	0.0737492
OBJ38812_TMT10.txt	1	OBJ38812_TMT10.txt_1	129N	A0A1B0GR85_MOUSE|A0A1B0GR85	14.142	KO_Uninfect_1	KO_Uninfect	NA	Model	NA	NA	Model	18078.1	225105	0.0803097
OBJ38812_TMT10.txt	1	OBJ38812_TMT10.txt_1	131C	A0A1B0GR85_MOUSE|A0A1B0GR85	14.0435	KO_Uninfect_2	KO_Uninfect	NA	Model	NA	NA	Model	16885.5	225105	0.0750117
OBJ38812_TMT10.txt	1	OBJ38812_TMT10.txt_1	126C	A0A1B0GR85_MOUSE|A0A1B0GR85	14.448	WT_Early_1	WT_Early	NA	Model	NA	NA	Model	22350.1	225105	0.0992875
OBJ38812_TMT10.txt	1	OBJ38812_TMT10.txt_1	129C	A0A1B0GR85_MOUSE|A0A1B0GR85	14.4119	WT_Early_2	WT_Early	NA	Model	NA	NA	Model	21797.3	225105	0.0968316
OBJ38812_TMT10.txt	1	OBJ38812_TMT10.txt_1	127C	A0A1B0GR85_MOUSE|A0A1B0GR85	14.162	WT_Late_1	WT_Late	NA	Model	NA	NA	Model	18331.6	225105	0.0814358
OBJ38812_TMT10.txt	1	OBJ38812_TMT10.txt_1	130C	A0A1B0GR85_MOUSE|A0A1B0GR85	14.1688	WT_Late_2	WT_Late	NA	Model	NA	NA	Model	18417.5	225105	0.0818172
OBJ38812_TMT10.txt	1	OBJ38812_TMT10.txt_1	128C	A0A1B0GR85_MOUSE|A0A1B0GR85	14.3876	WT_Uninfect_1	WT_Uninfect	NA	Model	NA	NA	Model	21433.3	225105	0.0952145
OBJ38812_TMT10_p2.txt	1	OBJ38812_TMT10_p2.txt_1	127N	A0A1B0GT33_MOUSE|A0A1B0GT33	14.7583	KO_Early_3	KO_Early	NA	Model	NA	NA	Model	27712.7	320171	0.086556
OBJ38812_TMT10_p2.txt	1	OBJ38812_TMT10_p2.txt_1	130N	A0A1B0GT33_MOUSE|A0A1B0GT33	14.8672	KO_Early_4	KO_Early	NA	Model	NA	NA	Model	29886.2	320171	0.0933447
OBJ38812_TMT10_p2.txt	1	OBJ38812_TMT10_p2.txt_1	128N	A0A1B0GT33_MOUSE|A0A1B0GT33	14.7812	KO_Late_3	KO_Late	NA	Model	NA	NA	Model	28156.8	320171	0.0879432
OBJ38812_TMT10_p2.txt	1	OBJ38812_TMT10_p2.txt_1	131N	A0A1B0GT33_MOUSE|A0A1B0GT33	15.0371	KO_Late_4	KO_Late	NA	Model	NA	NA	Model	33621.1	320171	0.10501
OBJ38812_TMT10_p2.txt	1	OBJ38812_TMT10_p2.txt_1	129N	A0A1B0GT33_MOUSE|A0A1B0GT33	14.7336	KO_Uninfect_3	KO_Uninfect	NA	Model	NA	NA	Model	27243.2	320171	0.0850897
OBJ38812_TMT10_p2.txt	1	OBJ38812_TMT10_p2.txt_1	126C	A0A1B0GT33_MOUSE|A0A1B0GT33	14.5228	WT_Early_3	WT_Early	NA	Model	NA	NA	Model	23539.6	320171	0.0735221
OBJ38812_TMT10_p2.txt	1	OBJ38812_TMT10_p2.txt_1	129C	A0A1B0GT33_MOUSE|A0A1B0GT33	14.5151	WT_Early_4	WT_Early	NA	Model	NA	NA	Model	23414	320171	0.0731298
OBJ38812_TMT10_p2.txt	1	OBJ38812_TMT10_p2.txt_1	127C	A0A1B0GT33_MOUSE|A0A1B0GT33	14.6707	WT_Late_3	WT_Late	NA	Model	NA	NA	Model	26081	320171	0.0814597
OBJ38812_TMT10_p2.txt	1	OBJ38812_TMT10_p2.txt_1	130C	A0A1B0GT33_MOUSE|A0A1B0GT33	14.7822	WT_Late_4	WT_Late	NA	Model	NA	NA	Model	28176	320171	0.0880029
OBJ38812_TMT10_p2.txt	1	OBJ38812_TMT10_p2.txt_1	128C	A0A1B0GT33_MOUSE|A0A1B0GT33	14.1586	WT_Uninfect_3	WT_Uninfect	NA	Model	NA	NA	Model	18288.5	320171	0.057121
OBJ38812_TMT10_p2.txt	1	OBJ38812_TMT10_p2.txt_1	131C	A0A1B0GT33_MOUSE|A0A1B0GT33	14.7604	WT_Uninfect_4	WT_Uninfect	NA	Model	NA	NA	Model	27753.3	320171	0.0866828
OBJ38812_TMT10_p2.txt	1	OBJ38812_TMT10_p2.txt_1	127N	A0A1D5RLD1_MOUSE|A0A1D5RLD1	14.2706	KO_Early_3	KO_Early	NA	Model	NA	NA	Model	19763.5	210299	0.0939784
OBJ38812_TMT10_p2.txt	1	OBJ38812_TMT10_p2.txt_1	130N	A0A1D5RLD1_MOUSE|A0A1D5RLD1	13.9638	KO_Early_4	KO_Early	NA	Model	NA	NA	Model	15978.4	210299	0.0759795
OBJ38812_TMT10_p2.txt	1	OBJ38812_TMT10_p2.txt_1	128N	A0A1D5RLD1_MOUSE|A0A1D5RLD1	14.1678	KO_Late_3	KO_Late	NA	Model	NA	NA	Model	18404.9	210299	0.0875179
OBJ38812_TMT10_p2.txt	1	OBJ38812_TMT10_p2.txt_1	131N	A0A1D5RLD1_MOUSE|A0A1D5RLD1	13.7469	KO_Late_4	KO_Late	NA	Model	NA	NA	Model	13748.1	210299	0.0653744
OBJ38812_TMT10_p2.txt	1	OBJ38812_TMT10_p2.txt_1	129N	A0A1D5RLD1_MOUSE|A0A1D5RLD1	14.0552	KO_Uninfect_3	KO_Uninfect	NA	Model	NA	NA	Model	17023.5	210299	0.0809489
OBJ38812_TMT10_p2.txt	1	OBJ38812_TMT10_p2.txt_1	126C	A0A1D5RLD1_MOUSE|A0A1D5RLD1	14.2799	WT_Early_3	WT_Early	NA	Model	NA	NA	Model	19892.4	210299	0.0945914
OBJ38812_TMT10_p2.txt	1	OBJ38812_TMT10_p2.txt_1	129C	A0A1D5RLD1_MOUSE|A0A1D5RLD1	14.0335	WT_Early_4	WT_Early	NA	Model	NA	NA	Model	16769	210299	0.0797388
OBJ38812_TMT10_p2.txt	1	OBJ38812_TMT10_p2.txt_1	127C	A0A1D5RLD1_MOUSE|A0A1D5RLD1	13.7495	WT_Late_3	WT_Late	NA	Model	NA	NA	Model	13772.3	210299	0.0654891
OBJ38812_TMT10_p2.txt	1	OBJ38812_TMT10_p2.txt_1	130C	A0A1D5RLD1_MOUSE|A0A1D5RLD1	13.9762	WT_Late_4	WT_Late	NA	Model	NA	NA	Model	16115.4	210299	0.0766311
OBJ38812_TMT10_p2.txt	1	OBJ38812_TMT10_p2.txt_1	128C	A0A1D5RLD1_MOUSE|A0A1D5RLD1	14.3148	WT_Uninfect_3	WT_Uninfect	NA	Model	NA	NA	Model	20378.5	210299	0.0969024
OBJ38812_TMT10_p2.txt	1	OBJ38812_TMT10_p2.txt_1	131C	A0A1D5RLD1_MOUSE|A0A1D5RLD1	14.3868	WT_Uninfect_4	WT_Uninfect	NA	Model	NA	NA	Model	21422.4	210299	0.101867
OBJ38812_TMT10_p2.txt	1	OBJ38812_TMT10_p2.txt_1	127N	A0A1D5RLM2_MOUSE|A0A1D5RLM2	14.8816	KO_Early_3	KO_Early	NA	Model	NA	NA	Model	30186.3	462989	0.0651987
OBJ38812_TMT10_p2.txt	1	OBJ38812_TMT10_p2.txt_1	130N	A0A1D5RLM2_MOUSE|A0A1D5RLM2	15.0577	KO_Early_4	KO_Early	NA	Model	NA	NA	Model	34105.5	462989	0.0736636
OBJ38812_TMT10_p2.txt	1	OBJ38812_TMT10_p2.txt_1	128N	A0A1D5RLM2_MOUSE|A0A1D5RLM2	15.0042	KO_Late_3	KO_Late	NA	Model	NA	NA	Model	32863	462989	0.0709801
OBJ38812_TMT10_p2.txt	1	OBJ38812_TMT10_p2.txt_1	131N	A0A1D5RLM2_MOUSE|A0A1D5RLM2	15.1394	KO_Late_4	KO_Late	NA	Model	NA	NA	Model	36092.8	462989	0.077956
OBJ38812_TMT10_p2.txt	1	OBJ38812_TMT10_p2.txt_1	129N	A0A1D5RLM2_MOUSE|A0A1D5RLM2	15.1488	KO_Uninfect_3	KO_Uninfect	NA	Model	NA	NA	Model	36327.5	462989	0.0784629
OBJ38812_TMT10_p2.txt	1	OBJ38812_TMT10_p2.txt_1	126C	A0A1D5RLM2_MOUSE|A0A1D5RLM2	15.428	WT_Early_3	WT_Early	NA	Model	NA	NA	Model	44084.7	462989	0.0952175
OBJ38812_TMT10_p2.txt	1	OBJ38812_TMT10_p2.txt_1	129C	A0A1D5RLM2_MOUSE|A0A1D5RLM2	15.3739	WT_Early_4	WT_Early	NA	Model	NA	NA	Model	42461.3	462989	0.0917113
OBJ38812_TMT10_p2.txt	1	OBJ38812_TMT10_p2.txt_1	127C	A0A1D5RLM2_MOUSE|A0A1D5RLM2	15.4024	WT_Late_3	WT_Late	NA	Model	NA	NA	Model	43309.5	462989	0.0935432
OBJ38812_TMT10_p2.txt	1	OBJ38812_TMT10_p2.txt_1	130C	A0A1D5RLM2_MOUSE|A0A1D5RLM2	15.4775	WT_Late_4	WT_Late	NA	Model	NA	NA	Model	45624	462989	0.0985423
OBJ38812_TMT10_p2.txt	1	OBJ38812_TMT10_p2.txt_1	128C	A0A1D5RLM2_MOUSE|A0A1D5RLM2	15.0409	WT_Uninfect_3	WT_Uninfect	NA	Model	NA	NA	Model	33709.3	462989	0.072808
OBJ38812_TMT10_p2.txt	1	OBJ38812_TMT10_p2.txt_1	131C	A0A1D5RLM2_MOUSE|A0A1D5RLM2	15.5113	WT_Uninfect_4	WT_Uninfect	NA	Model	NA	NA	Model	46703.8	462989	0.100874
OBJ38812_TMT10.txt	1	OBJ38812_TMT10.txt_1	127N	A0A1D5RLM2_MOUSE|A0A1D5RLM2	14.8475	KO_Early_1	KO_Early	NA	Model	NA	NA	Model	29480.5	448468	0.0657361
OBJ38812_TMT10.txt	1	OBJ38812_TMT10.txt_1	130N	A0A1D5RLM2_MOUSE|A0A1D5RLM2	14.9367	KO_Early_2	KO_Early	NA	Model	NA	NA	Model	31362.3	448468	0.0699321
OBJ38812_TMT10.txt	1	OBJ38812_TMT10.txt_1	128N	A0A1D5RLM2_MOUSE|A0A1D5RLM2	15.1638	KO_Late_1	KO_Late	NA	Model	NA	NA	Model	36708.5	448468	0.0818532
OBJ38812_TMT10.txt	1	OBJ38812_TMT10.txt_1	131N	A0A1D5RLM2_MOUSE|A0A1D5RLM2	14.9386	KO_Late_2	KO_Late	NA	Model	NA	NA	Model	31401.7	448468	0.07002
OBJ38812_TMT10.txt	1	OBJ38812_TMT10.txt_1	129N	A0A1D5RLM2_MOUSE|A0A1D5RLM2	15.3763	KO_Uninfect_1	KO_Uninfect	NA	Model	NA	NA	Model	42533.5	448468	0.0948417
OBJ38812_TMT10.txt	1	OBJ38812_TMT10.txt_1	131C	A0A1D5RLM2_MOUSE|A0A1D5RLM2	14.9755	KO_Uninfect_2	KO_Uninfect	NA	Model	NA	NA	Model	32216	448468	0.0718358
OBJ38812_TMT10.txt	1	OBJ38812_TMT10.txt_1	126C	A0A1D5RLM2_MOUSE|A0A1D5RLM2	15.3167	WT_Early_1	WT_Early	NA	Model	NA	NA	Model	40811.8	448468	0.0910027
OBJ38812_TMT10.txt	1	OBJ38812_TMT10.txt_1	129C	A0A1D5RLM2_MOUSE|A0A1D5RLM2	15.2922	WT_Early_2	WT_Early	NA	Model	NA	NA	Model	40125.7	448468	0.0894729
OBJ38812_TMT10.txt	1	OBJ38812_TMT10.txt_1	127C	A0A1D5RLM2_MOUSE|A0A1D5RLM2	15.3487	WT_Late_1	WT_Late	NA	Model	NA	NA	Model	41727	448468	0.0930435
OBJ38812_TMT10.txt	1	OBJ38812_TMT10.txt_1	130C	A0A1D5RLM2_MOUSE|A0A1D5RLM2	15.3098	WT_Late_2	WT_Late	NA	Model	NA	NA	Model	40617.2	448468	0.090569
OBJ38812_TMT10.txt	1	OBJ38812_TMT10.txt_1	128C	A0A1D5RLM2_MOUSE|A0A1D5RLM2	15.424	WT_Uninfect_1	WT_Uninfect	NA	Model	NA	NA	Model	43961.9	448468	0.0980269
OBJ38812_TMT10_p2.txt	1	OBJ38812_TMT10_p2.txt_1	127N	A0A1L1SSC0_MOUSE|A0A1L1SSC0	15.8466	KO_Early_3	KO_Early	NA	Model	NA	NA	Model	58925.6	625022	0.0942777
OBJ38812_TMT10_p2.txt	1	OBJ38812_TMT10_p2.txt_1	130N	A0A1L1SSC0_MOUSE|A0A1L1SSC0	15.6225	KO_Early_4	KO_Early	NA	Model	NA	NA	Model	50449.3	625022	0.080716
OBJ38812_TMT10_p2.txt	1	OBJ38812_TMT10_p2.txt_1	128N	A0A1L1SSC0_MOUSE|A0A1L1SSC0	15.7094	KO_Late_3	KO_Late	NA	Model	NA	NA	Model	53580.7	625022	0.0857262
OBJ38812_TMT10_p2.txt	1	OBJ38812_TMT10_p2.txt_1	131N	A0A1L1SSC0_MOUSE|A0A1L1SSC0	15.8193	KO_Late_4	KO_Late	NA	Model	NA	NA	Model	57821.4	625022	0.092511
OBJ38812_TMT10_p2.txt	1	OBJ38812_TMT10_p2.txt_1	129N	A0A1L1SSC0_MOUSE|A0A1L1SSC0	15.9811	KO_Uninfect_3	KO_Uninfect	NA	Model	NA	NA	Model	64682.2	625022	0.103488
OBJ38812_TMT10_p2.txt	1	OBJ38812_TMT10_p2.txt_1	126C	A0A1L1SSC0_MOUSE|A0A1L1SSC0	15.7656	WT_Early_3	WT_Early	NA	Model	NA	NA	Model	55706.9	625022	0.0891279
OBJ38812_TMT10_p2.txt	1	OBJ38812_TMT10_p2.txt_1	129C	A0A1L1SSC0_MOUSE|A0A1L1SSC0	15.6898	WT_Early_4	WT_Early	NA	Model	NA	NA	Model	52855.3	625022	0.0845655
OBJ38812_TMT10_p2.txt	1	OBJ38812_TMT10_p2.txt_1	127C	A0A1L1SSC0_MOUSE|A0A1L1SSC0	15.6111	WT_Late_3	WT_Late	NA	Model	NA	NA	Model	50051.1	625022	0.080079
OBJ38812_TMT10_p2.txt	1	OBJ38812_TMT10_p2.txt_1	130C	A0A1L1SSC0_MOUSE|A0A1L1SSC0	15.5809	WT_Late_4	WT_Late	NA	Model	NA	NA	Model	49013.6	625022	0.0784191
OBJ38812_TMT10_p2.txt	1	OBJ38812_TMT10_p2.txt_1	128C	A0A1L1SSC0_MOUSE|A0A1L1SSC0	14.8106	WT_Uninfect_3	WT_Uninfect	NA	Model	NA	NA	Model	28735.6	625022	0.0459754
OBJ38812_TMT10_p2.txt	1	OBJ38812_TMT10_p2.txt_1	131C	A0A1L1SSC0_MOUSE|A0A1L1SSC0	15.6664	WT_Uninfect_4	WT_Uninfect	NA	Model	NA	NA	Model	52006	625022	0.0832067
OBJ38812_TMT10_p2.txt	1	OBJ38812_TMT10_p2.txt_1	127N	A0A1L1SSC7_MOUSE|A0A1L1SSC7	14.7226	KO_Early_3	KO_Early	NA	Model	NA	NA	Model	27035.6	322743	0.083768
OBJ38812_TMT10_p2.txt	1	OBJ38812_TMT10_p2.txt_1	130N	A0A1L1SSC7_MOUSE|A0A1L1SSC7	14.7328	KO_Early_4	KO_Early	NA	Model	NA	NA	Model	27228.8	322743	0.0843666
OBJ38812_TMT10_p2.txt	1	OBJ38812_TMT10_p2.txt_1	128N	A0A1L1SSC7_MOUSE|A0A1L1SSC7	14.9204	KO_Late_3	KO_Late	NA	Model	NA	NA	Model	31009.3	322743	0.0960803
OBJ38812_TMT10_p2.txt	1	OBJ38812_TMT10_p2.txt_1	131N	A0A1L1SSC7_MOUSE|A0A1L1SSC7	14.3731	KO_Late_4	KO_Late	NA	Model	NA	NA	Model	21218.8	322743	0.065745
OBJ38812_TMT10_p2.txt	1	OBJ38812_TMT10_p2.txt_1	129N	A0A1L1SSC7_MOUSE|A0A1L1SSC7	14.9758	KO_Uninfect_3	KO_Uninfect	NA	Model	NA	NA	Model	32223.3	322743	0.099842
OBJ38812_TMT10_p2.txt	1	OBJ38812_TMT10_p2.txt_1	126C	A0A1L1SSC7_MOUSE|A0A1L1SSC7	14.7847	WT_Early_3	WT_Early	NA	Model	NA	NA	Model	28225.1	322743	0.0874537
OBJ38812_TMT10_p2.txt	1	OBJ38812_TMT10_p2.txt_1	129C	A0A1L1SSC7_MOUSE|A0A1L1SSC7	14.7135	WT_Early_4	WT_Early	NA	Model	NA	NA	Model	26866.5	322743	0.0832443
OBJ38812_TMT10_p2.txt	1	OBJ38812_TMT10_p2.txt_1	127C	A0A1L1SSC7_MOUSE|A0A1L1SSC7	14.6351	WT_Late_3	WT_Late	NA	Model	NA	NA	Model	25445.8	322743	0.0788421
OBJ38812_TMT10_p2.txt	1	OBJ38812_TMT10_p2.txt_1	130C	A0A1L1SSC7_MOUSE|A0A1L1SSC7	14.6977	WT_Late_4	WT_Late	NA	Model	NA	NA	Model	26573.8	322743	0.0823373
OBJ38812_TMT10_p2.txt	1	OBJ38812_TMT10_p2.txt_1	128C	A0A1L1SSC7_MOUSE|A0A1L1SSC7	14.7473	WT_Uninfect_3	WT_Uninfect	NA	Model	NA	NA	Model	27502.2	322743	0.0852139
OBJ38812_TMT10_p2.txt	1	OBJ38812_TMT10_p2.txt_1	131C	A0A1L1SSC7_MOUSE|A0A1L1SSC7	14.4404	WT_Uninfect_4	WT_Uninfect	NA	Model	NA	NA	Model	22233.4	322743	0.0688886
OBJ38812_TMT10.txt	1	OBJ38812_TMT10.txt_1	127N	A0A1L1SSC7_MOUSE|A0A1L1SSC7	14.8248	KO_Early_1	KO_Early	NA	Model	NA	NA	Model	29020.1	332229	0.0873496
OBJ38812_TMT10.txt	1	OBJ38812_TMT10.txt_1	130N	A0A1L1SSC7_MOUSE|A0A1L1SSC7	14.787	KO_Early_2	KO_Early	NA	Model	NA	NA	Model	28271.1	332229	0.085095
OBJ38812_TMT10.txt	1	OBJ38812_TMT10.txt_1	128N	A0A1L1SSC7_MOUSE|A0A1L1SSC7	14.797	KO_Late_1	KO_Late	NA	Model	NA	NA	Model	28467.6	332229	0.0856867
OBJ38812_TMT10.txt	1	OBJ38812_TMT10.txt_1	131N	A0A1L1SSC7_MOUSE|A0A1L1SSC7	14.8285	KO_Late_2	KO_Late	NA	Model	NA	NA	Model	29094.6	332229	0.0875738
OBJ38812_TMT10.txt	1	OBJ38812_TMT10.txt_1	129N	A0A1L1SSC7_MOUSE|A0A1L1SSC7	15.0426	KO_Uninfect_1	KO_Uninfect	NA	Model	NA	NA	Model	33749.8	332229	0.101586
OBJ38812_TMT10.txt	1	OBJ38812_TMT10.txt_1	131C	A0A1L1SSC7_MOUSE|A0A1L1SSC7	14.9098	KO_Uninfect_2	KO_Uninfect	NA	Model	NA	NA	Model	30782.1	332229	0.0926532
OBJ38812_TMT10.txt	1	OBJ38812_TMT10.txt_1	126C	A0A1L1SSC7_MOUSE|A0A1L1SSC7	14.7141	WT_Early_1	WT_Early	NA	Model	NA	NA	Model	26877.2	332229	0.0808994
OBJ38812_TMT10.txt	1	OBJ38812_TMT10.txt_1	129C	A0A1L1SSC7_MOUSE|A0A1L1SSC7	14.4063	WT_Early_2	WT_Early	NA	Model	NA	NA	Model	21713.9	332229	0.0653582
OBJ38812_TMT10.txt	1	OBJ38812_TMT10.txt_1	127C	A0A1L1SSC7_MOUSE|A0A1L1SSC7	14.5011	WT_Late_1	WT_Late	NA	Model	NA	NA	Model	23188	332229	0.0697951
OBJ38812_TMT10.txt	1	OBJ38812_TMT10.txt_1	130C	A0A1L1SSC7_MOUSE|A0A1L1SSC7	14.4805	WT_Late_2	WT_Late	NA	Model	NA	NA	Model	22859.2	332229	0.0688055
OBJ38812_TMT10.txt	1	OBJ38812_TMT10.txt_1	128C	A0A1L1SSC7_MOUSE|A0A1L1SSC7	14.9211	WT_Uninfect_1	WT_Uninfect	NA	Model	NA	NA	Model	31025	332229	0.0933841
OBJ38812_TMT10_p2.txt	1	OBJ38812_TMT10_p2.txt_1	127N	A0A1N9PTV1_MOUSE|A0A1N9PTV1	14.2654	KO_Early_3	KO_Early	NA	Model	NA	NA	Model	19692.9	250231	0.0786987
OBJ38812_TMT10_p2.txt	1	OBJ38812_TMT10_p2.txt_1	130N	A0A1N9PTV1_MOUSE|A0A1N9PTV1	14.2618	KO_Early_4	KO_Early	NA	Model	NA	NA	Model	19643.8	250231	0.0785025
OBJ38812_TMT10_p2.txt	1	OBJ38812_TMT10_p2.txt_1	128N	A0A1N9PTV1_MOUSE|A0A1N9PTV1	14.5084	KO_Late_3	KO_Late	NA	Model	NA	NA	Model	23305.3	250231	0.0931351
OBJ38812_TMT10_p2.txt	1	OBJ38812_TMT10_p2.txt_1	131N	A0A1N9PTV1_MOUSE|A0A1N9PTV1	14.645	KO_Late_4	KO_Late	NA	Model	NA	NA	Model	25619.8	250231	0.102384
OBJ38812_TMT10_p2.txt	1	OBJ38812_TMT10_p2.txt_1	129N	A0A1N9PTV1_MOUSE|A0A1N9PTV1	14.1787	KO_Uninfect_3	KO_Uninfect	NA	Model	NA	NA	Model	18545	250231	0.0741114
OBJ38812_TMT10_p2.txt	1	OBJ38812_TMT10_p2.txt_1	126C	A0A1N9PTV1_MOUSE|A0A1N9PTV1	14.2651	WT_Early_3	WT_Early	NA	Model	NA	NA	Model	19689	250231	0.0786831
OBJ38812_TMT10_p2.txt	1	OBJ38812_TMT10_p2.txt_1	129C	A0A1N9PTV1_MOUSE|A0A1N9PTV1	14.0349	WT_Early_4	WT_Early	NA	Model	NA	NA	Model	16785.6	250231	0.0670805
OBJ38812_TMT10_p2.txt	1	OBJ38812_TMT10_p2.txt_1	127C	A0A1N9PTV1_MOUSE|A0A1N9PTV1	14.397	WT_Late_3	WT_Late	NA	Model	NA	NA	Model	21573.4	250231	0.0862138
OBJ38812_TMT10_p2.txt	1	OBJ38812_TMT10_p2.txt_1	130C	A0A1N9PTV1_MOUSE|A0A1N9PTV1	14.564	WT_Late_4	WT_Late	NA	Model	NA	NA	Model	24221.3	250231	0.0967957
OBJ38812_TMT10_p2.txt	1	OBJ38812_TMT10_p2.txt_1	128C	A0A1N9PTV1_MOUSE|A0A1N9PTV1	13.8512	WT_Uninfect_3	WT_Uninfect	NA	Model	NA	NA	Model	14778.8	250231	0.0590606
OBJ38812_TMT10_p2.txt	1	OBJ38812_TMT10_p2.txt_1	131C	A0A1N9PTV1_MOUSE|A0A1N9PTV1	14.6798	WT_Uninfect_4	WT_Uninfect	NA	Model	NA	NA	Model	26245.1	250231	0.104884
OBJ38812_TMT10.txt	1	OBJ38812_TMT10.txt_1	127N	A0A1N9PTV1_MOUSE|A0A1N9PTV1	13.9985	KO_Early_1	KO_Early	NA	Model	NA	NA	Model	16367.3	244018	0.067074
OBJ38812_TMT10.txt	1	OBJ38812_TMT10.txt_1	130N	A0A1N9PTV1_MOUSE|A0A1N9PTV1	14.0767	KO_Early_2	KO_Early	NA	Model	NA	NA	Model	17278.3	244018	0.0708073
OBJ38812_TMT10.txt	1	OBJ38812_TMT10.txt_1	128N	A0A1N9PTV1_MOUSE|A0A1N9PTV1	14.4012	KO_Late_1	KO_Late	NA	Model	NA	NA	Model	21637.3	244018	0.088671
OBJ38812_TMT10.txt	1	OBJ38812_TMT10.txt_1	131N	A0A1N9PTV1_MOUSE|A0A1N9PTV1	14.4377	KO_Late_2	KO_Late	NA	Model	NA	NA	Model	22191.2	244018	0.0909406
OBJ38812_TMT10.txt	1	OBJ38812_TMT10.txt_1	129N	A0A1N9PTV1_MOUSE|A0A1N9PTV1	14.1459	KO_Uninfect_1	KO_Uninfect	NA	Model	NA	NA	Model	18128.1	244018	0.07429
OBJ38812_TMT10.txt	1	OBJ38812_TMT10.txt_1	131C	A0A1N9PTV1_MOUSE|A0A1N9PTV1	14.3425	KO_Uninfect_2	KO_Uninfect	NA	Model	NA	NA	Model	20774.5	244018	0.0851351
OBJ38812_TMT10.txt	1	OBJ38812_TMT10.txt_1	126C	A0A1N9PTV1_MOUSE|A0A1N9PTV1	14.1144	WT_Early_1	WT_Early	NA	Model	NA	NA	Model	17736	244018	0.072683
OBJ38812_TMT10.txt	1	OBJ38812_TMT10.txt_1	129C	A0A1N9PTV1_MOUSE|A0A1N9PTV1	14.3872	WT_Early_2	WT_Early	NA	Model	NA	NA	Model	21428.5	244018	0.087815
OBJ38812_TMT10.txt	1	OBJ38812_TMT10.txt_1	127C	A0A1N9PTV1_MOUSE|A0A1N9PTV1	14.3272	WT_Late_1	WT_Late	NA	Model	NA	NA	Model	20555.3	244018	0.0842368
OBJ38812_TMT10.txt	1	OBJ38812_TMT10.txt_1	130C	A0A1N9PTV1_MOUSE|A0A1N9PTV1	14.6368	WT_Late_2	WT_Late	NA	Model	NA	NA	Model	25474.3	244018	0.104395
OBJ38812_TMT10.txt	1	OBJ38812_TMT10.txt_1	128C	A0A1N9PTV1_MOUSE|A0A1N9PTV1	14.4458	WT_Uninfect_1	WT_Uninfect	NA	Model	NA	NA	Model	22316.2	244018	0.0914532
OBJ38812_TMT10_p2.txt	1	OBJ38812_TMT10_p2.txt_1	127N	A0A1S5R8A0_SHIFL|A0A1S5R8A0	16.9298	KO_Early_3	KO_Early	NA	Model	NA	NA	Model	124846	1.9023e+06	0.0656286
OBJ38812_TMT10_p2.txt	1	OBJ38812_TMT10_p2.txt_1	130N	A0A1S5R8A0_SHIFL|A0A1S5R8A0	16.9382	KO_Early_4	KO_Early	NA	Model	NA	NA	Model	125578	1.9023e+06	0.0660136
OBJ38812_TMT10_p2.txt	1	OBJ38812_TMT10_p2.txt_1	128N	A0A1S5R8A0_SHIFL|A0A1S5R8A0	16.9895	KO_Late_3	KO_Late	NA	Model	NA	NA	Model	130117	1.9023e+06	0.0683998
OBJ38812_TMT10_p2.txt	1	OBJ38812_TMT10_p2.txt_1	131N	A0A1S5R8A0_SHIFL|A0A1S5R8A0	16.9302	KO_Late_4	KO_Late	NA	Model	NA	NA	Model	124880	1.9023e+06	0.0656467
OBJ38812_TMT10_p2.txt	1	OBJ38812_TMT10_p2.txt_1	129N	A0A1S5R8A0_SHIFL|A0A1S5R8A0	16.9244	KO_Uninfect_3	KO_Uninfect	NA	Model	NA	NA	Model	124377	1.9023e+06	0.0653823
OBJ38812_TMT10_p2.txt	1	OBJ38812_TMT10_p2.txt_1	126C	A0A1S5R8A0_SHIFL|A0A1S5R8A0	17.5069	WT_Early_3	WT_Early	NA	Model	NA	NA	Model	186255	1.9023e+06	0.09791
OBJ38812_TMT10_p2.txt	1	OBJ38812_TMT10_p2.txt_1	129C	A0A1S5R8A0_SHIFL|A0A1S5R8A0	17.4978	WT_Early_4	WT_Early	NA	Model	NA	NA	Model	185081	1.9023e+06	0.0972931
OBJ38812_TMT10_p2.txt	1	OBJ38812_TMT10_p2.txt_1	127C	A0A1S5R8A0_SHIFL|A0A1S5R8A0	17.4796	WT_Late_3	WT_Late	NA	Model	NA	NA	Model	182758	1.9023e+06	0.0960717
OBJ38812_TMT10_p2.txt	1	OBJ38812_TMT10_p2.txt_1	130C	A0A1S5R8A0_SHIFL|A0A1S5R8A0	17.4709	WT_Late_4	WT_Late	NA	Model	NA	NA	Model	181662	1.9023e+06	0.0954958
OBJ38812_TMT10_p2.txt	1	OBJ38812_TMT10_p2.txt_1	128C	A0A1S5R8A0_SHIFL|A0A1S5R8A0	17.2782	WT_Uninfect_3	WT_Uninfect	NA	Model	NA	NA	Model	158945	1.9023e+06	0.0835537
OBJ38812_TMT10_p2.txt	1	OBJ38812_TMT10_p2.txt_1	131C	A0A1S5R8A0_SHIFL|A0A1S5R8A0	17.7975	WT_Uninfect_4	WT_Uninfect	NA	Model	NA	NA	Model	227814	1.9023e+06	0.119757
OBJ38812_TMT10_p2.txt	1	OBJ38812_TMT10_p2.txt_1	127N	A0A1W2MEC2_SHIFL|A0A1W2MEC2	18.053	KO_Early_3	KO_Early	NA	Model	NA	NA	Model	271952	3.11846e+06	0.0872071
OBJ38812_TMT10_p2.txt	1	OBJ38812_TMT10_p2.txt_1	130N	A0A1W2MEC2_SHIFL|A0A1W2MEC2	17.8553	KO_Early_4	KO_Early	NA	Model	NA	NA	Model	237126	3.11846e+06	0.0760397
OBJ38812_TMT10_p2.txt	1	OBJ38812_TMT10_p2.txt_1	128N	A0A1W2MEC2_SHIFL|A0A1W2MEC2	17.7769	KO_Late_3	KO_Late	NA	Model	NA	NA	Model	224588	3.11846e+06	0.0720191
OBJ38812_TMT10_p2.txt	1	OBJ38812_TMT10_p2.txt_1	131N	A0A1W2MEC2_SHIFL|A0A1W2MEC2	18.0857	KO_Late_4	KO_Late	NA	Model	NA	NA	Model	278180	3.11846e+06	0.0892044
OBJ38812_TMT10_p2.txt	1	OBJ38812_TMT10_p2.txt_1	129N	A0A1W2MEC2_SHIFL|A0A1W2MEC2	18.0821	KO_Uninfect_3	KO_Uninfect	NA	Model	NA	NA	Model	277487	3.11846e+06	0.0889822
OBJ38812_TMT10_p2.txt	1	OBJ38812_TMT10_p2.txt_1	126C	A0A1W2MEC2_SHIFL|A0A1W2MEC2	18.0146	WT_Early_3	WT_Early	NA	Model	NA	NA	Model	264807	3.11846e+06	0.084916
OBJ38812_TMT10_p2.txt	1	OBJ38812_TMT10_p2.txt_1	129C	A0A1W2MEC2_SHIFL|A0A1W2MEC2	18.1122	WT_Early_4	WT_Early	NA	Model	NA	NA	Model	283338	3.11846e+06	0.0908584
OBJ38812_TMT10_p2.txt	1	OBJ38812_TMT10_p2.txt_1	127C	A0A1W2MEC2_SHIFL|A0A1W2MEC2	17.8322	WT_Late_3	WT_Late	NA	Model	NA	NA	Model	233362	3.11846e+06	0.0748326
OBJ38812_TMT10_p2.txt	1	OBJ38812_TMT10_p2.txt_1	130C	A0A1W2MEC2_SHIFL|A0A1W2MEC2	18.0507	WT_Late_4	WT_Late	NA	Model	NA	NA	Model	271528	3.11846e+06	0.0870714
OBJ38812_TMT10_p2.txt	1	OBJ38812_TMT10_p2.txt_1	128C	A0A1W2MEC2_SHIFL|A0A1W2MEC2	17.7457	WT_Uninfect_3	WT_Uninfect	NA	Model	NA	NA	Model	219777	3.11846e+06	0.0704761
OBJ38812_TMT10_p2.txt	1	OBJ38812_TMT10_p2.txt_1	131C	A0A1W2MEC2_SHIFL|A0A1W2MEC2	18.2003	WT_Uninfect_4	WT_Uninfect	NA	Model	NA	NA	Model	301188	3.11846e+06	0.0965826
OBJ38812_TMT10_p2.txt	1	OBJ38812_TMT10_p2.txt_1	127N	A0A1W2MI56_SHIFL|A0A1W2MI56	16.7743	KO_Early_3	KO_Early	NA	Model	NA	NA	Model	112088	1.46676e+06	0.0764186
OBJ38812_TMT10_p2.txt	1	OBJ38812_TMT10_p2.txt_1	130N	A0A1W2MI56_SHIFL|A0A1W2MI56	17.0269	KO_Early_4	KO_Early	NA	Model	NA	NA	Model	133535	1.46676e+06	0.0910408
OBJ38812_TMT10_p2.txt	1	OBJ38812_TMT10_p2.txt_1	128N	A0A1W2MI56_SHIFL|A0A1W2MI56	16.8107	KO_Late_3	KO_Late	NA	Model	NA	NA	Model	114954	1.46676e+06	0.0783729
OBJ38812_TMT10_p2.txt	1	OBJ38812_TMT10_p2.txt_1	131N	A0A1W2MI56_SHIFL|A0A1W2MI56	16.9275	KO_Late_4	KO_Late	NA	Model	NA	NA	Model	124647	1.46676e+06	0.0849812
OBJ38812_TMT10_p2.txt	1	OBJ38812_TMT10_p2.txt_1	129N	A0A1W2MI56_SHIFL|A0A1W2MI56	17.1979	KO_Uninfect_3	KO_Uninfect	NA	Model	NA	NA	Model	150344	1.46676e+06	0.102501
OBJ38812_TMT10_p2.txt	1	OBJ38812_TMT10_p2.txt_1	126C	A0A1W2MI56_SHIFL|A0A1W2MI56	16.6602	WT_Early_3	WT_Early	NA	Model	NA	NA	Model	103570	1.46676e+06	0.0706111
OBJ38812_TMT10_p2.txt	1	OBJ38812_TMT10_p2.txt_1	129C	A0A1W2MI56_SHIFL|A0A1W2MI56	16.7782	WT_Early_4	WT_Early	NA	Model	NA	NA	Model	112397	1.46676e+06	0.0766292
OBJ38812_TMT10_p2.txt	1	OBJ38812_TMT10_p2.txt_1	127C	A0A1W2MI56_SHIFL|A0A1W2MI56	16.6963	WT_Late_3	WT_Late	NA	Model	NA	NA	Model	106191	1.46676e+06	0.0723981
OBJ38812_TMT10_p2.txt	1	OBJ38812_TMT10_p2.txt_1	130C	A0A1W2MI56_SHIFL|A0A1W2MI56	16.6856	WT_Late_4	WT_Late	NA	Model	NA	NA	Model	105406	1.46676e+06	0.0718631
OBJ38812_TMT10_p2.txt	1	OBJ38812_TMT10_p2.txt_1	128C	A0A1W2MI56_SHIFL|A0A1W2MI56	17.2833	WT_Uninfect_3	WT_Uninfect	NA	Model	NA	NA	Model	159507	1.46676e+06	0.108748
OBJ38812_TMT10_p2.txt	1	OBJ38812_TMT10_p2.txt_1	131C	A0A1W2MI56_SHIFL|A0A1W2MI56	16.9103	WT_Uninfect_4	WT_Uninfect	NA	Model	NA	NA	Model	123170	1.46676e+06	0.083974
OBJ38812_TMT10_p2.txt	1	OBJ38812_TMT10_p2.txt_1	127N	A0A1W2MJR7_SHIFL|A0A1W2MJR7	16.5483	KO_Early_3	KO_Early	NA	Model	NA	NA	Model	95838.3	984918	0.0973059
OBJ38812_TMT10_p2.txt	1	OBJ38812_TMT10_p2.txt_1	130N	A0A1W2MJR7_SHIFL|A0A1W2MJR7	14.8141	KO_Early_4	KO_Early	NA	Model	NA	NA	Model	28806.4	984918	0.0292475
OBJ38812_TMT10_p2.txt	1	OBJ38812_TMT10_p2.txt_1	128N	A0A1W2MJR7_SHIFL|A0A1W2MJR7	16.5678	KO_Late_3	KO_Late	NA	Model	NA	NA	Model	97143.8	984918	0.0986314
OBJ38812_TMT10_p2.txt	1	OBJ38812_TMT10_p2.txt_1	131N	A0A1W2MJR7_SHIFL|A0A1W2MJR7	16.3621	KO_Late_4	KO_Late	NA	Model	NA	NA	Model	84234.8	984918	0.0855246
OBJ38812_TMT10_p2.txt	1	OBJ38812_TMT10_p2.txt_1	129N	A0A1W2MJR7_SHIFL|A0A1W2MJR7	16.1769	KO_Uninfect_3	KO_Uninfect	NA	Model	NA	NA	Model	74083.3	984918	0.0752177
OBJ38812_TMT10_p2.txt	1	OBJ38812_TMT10_p2.txt_1	126C	A0A1W2MJR7_SHIFL|A0A1W2MJR7	16.2293	WT_Early_3	WT_Early	NA	Model	NA	NA	Model	76824.6	984918	0.078001
OBJ38812_TMT10_p2.txt	1	OBJ38812_TMT10_p2.txt_1	129C	A0A1W2MJR7_SHIFL|A0A1W2MJR7	15.7602	WT_Early_4	WT_Early	NA	Model	NA	NA	Model	55498.8	984918	0.0563487
OBJ38812_TMT10_p2.txt	1	OBJ38812_TMT10_p2.txt_1	127C	A0A1W2MJR7_SHIFL|A0A1W2MJR7	16.1697	WT_Late_3	WT_Late	NA	Model	NA	NA	Model	73716	984918	0.0748448
OBJ38812_TMT10_p2.txt	1	OBJ38812_TMT10_p2.txt_1	130C	A0A1W2MJR7_SHIFL|A0A1W2MJR7	16.0692	WT_Late_4	WT_Late	NA	Model	NA	NA	Model	68756.5	984918	0.0698094
OBJ38812_TMT10_p2.txt	1	OBJ38812_TMT10_p2.txt_1	128C	A0A1W2MJR7_SHIFL|A0A1W2MJR7	17.9281	WT_Uninfect_3	WT_Uninfect	NA	Model	NA	NA	Model	249405	984918	0.253224
OBJ38812_TMT10_p2.txt	1	OBJ38812_TMT10_p2.txt_1	131C	A0A1W2MJR7_SHIFL|A0A1W2MJR7	10.9605	WT_Uninfect_4	WT_Uninfect	NA	Model	NA	NA	Model	1992.65	984918	0.00202316
OBJ38812_TMT10_p2.txt	1	OBJ38812_TMT10_p2.txt_1	127N	A0A1W2P7J4_MOUSE|A0A1W2P7J4	15.3824	KO_Early_3	KO_Early	NA	Model	NA	NA	Model	42713.8	426021	0.100262
OBJ38812_TMT10_p2.txt	1	OBJ38812_TMT10_p2.txt_1	130N	A0A1W2P7J4_MOUSE|A0A1W2P7J4	15.0563	KO_Early_4	KO_Early	NA	Model	NA	NA	Model	34072.9	426021	0.0799796
OBJ38812_TMT10_p2.txt	1	OBJ38812_TMT10_p2.txt_1	128N	A0A1W2P7J4_MOUSE|A0A1W2P7J4	15.3576	KO_Late_3	KO_Late	NA	Model	NA	NA	Model	41984.5	426021	0.0985505
OBJ38812_TMT10_p2.txt	1	OBJ38812_TMT10_p2.txt_1	131N	A0A1W2P7J4_MOUSE|A0A1W2P7J4	15.2733	KO_Late_4	KO_Late	NA	Model	NA	NA	Model	39603	426021	0.0929602
OBJ38812_TMT10_p2.txt	1	OBJ38812_TMT10_p2.txt_1	129N	A0A1W2P7J4_MOUSE|A0A1W2P7J4	15.3509	KO_Uninfect_3	KO_Uninfect	NA	Model	NA	NA	Model	41791.5	426021	0.0980975
OBJ38812_TMT10_p2.txt	1	OBJ38812_TMT10_p2.txt_1	126C	A0A1W2P7J4_MOUSE|A0A1W2P7J4	15.0221	WT_Early_3	WT_Early	NA	Model	NA	NA	Model	33273	426021	0.078102
OBJ38812_TMT10_p2.txt	1	OBJ38812_TMT10_p2.txt_1	129C	A0A1W2P7J4_MOUSE|A0A1W2P7J4	14.9021	WT_Early_4	WT_Early	NA	Model	NA	NA	Model	30618.5	426021	0.071871
OBJ38812_TMT10_p2.txt	1	OBJ38812_TMT10_p2.txt_1	127C	A0A1W2P7J4_MOUSE|A0A1W2P7J4	15.0215	WT_Late_3	WT_Late	NA	Model	NA	NA	Model	33259.5	426021	0.0780703
OBJ38812_TMT10_p2.txt	1	OBJ38812_TMT10_p2.txt_1	130C	A0A1W2P7J4_MOUSE|A0A1W2P7J4	14.9117	WT_Late_4	WT_Late	NA	Model	NA	NA	Model	30823	426021	0.0723509
OBJ38812_TMT10_p2.txt	1	OBJ38812_TMT10_p2.txt_1	128C	A0A1W2P7J4_MOUSE|A0A1W2P7J4	15.1563	WT_Uninfect_3	WT_Uninfect	NA	Model	NA	NA	Model	36518.3	426021	0.0857197
OBJ38812_TMT10_p2.txt	1	OBJ38812_TMT10_p2.txt_1	131C	A0A1W2P7J4_MOUSE|A0A1W2P7J4	14.6194	WT_Uninfect_4	WT_Uninfect	NA	Model	NA	NA	Model	25169.3	426021	0.0590799
OBJ38812_TMT10.txt	1	OBJ38812_TMT10.txt_1	127N	A0A1W2P7J4_MOUSE|A0A1W2P7J4	15.1523	KO_Early_1	KO_Early	NA	Model	NA	NA	Model	36417.5	436982	0.0833387
OBJ38812_TMT10.txt	1	OBJ38812_TMT10.txt_1	130N	A0A1W2P7J4_MOUSE|A0A1W2P7J4	15.3113	KO_Early_2	KO_Early	NA	Model	NA	NA	Model	40659.8	436982	0.0930468
OBJ38812_TMT10.txt	1	OBJ38812_TMT10.txt_1	128N	A0A1W2P7J4_MOUSE|A0A1W2P7J4	15.1908	KO_Late_1	KO_Late	NA	Model	NA	NA	Model	37402.3	436982	0.0855922
OBJ38812_TMT10.txt	1	OBJ38812_TMT10.txt_1	131N	A0A1W2P7J4_MOUSE|A0A1W2P7J4	15.2185	KO_Late_2	KO_Late	NA	Model	NA	NA	Model	38127.5	436982	0.0872519
OBJ38812_TMT10.txt	1	OBJ38812_TMT10.txt_1	129N	A0A1W2P7J4_MOUSE|A0A1W2P7J4	15.258	KO_Uninfect_1	KO_Uninfect	NA	Model	NA	NA	Model	39184	436982	0.0896697
OBJ38812_TMT10.txt	1	OBJ38812_TMT10.txt_1	131C	A0A1W2P7J4_MOUSE|A0A1W2P7J4	15.2102	KO_Uninfect_2	KO_Uninfect	NA	Model	NA	NA	Model	37908.1	436982	0.0867497
OBJ38812_TMT10.txt	1	OBJ38812_TMT10.txt_1	126C	A0A1W2P7J4_MOUSE|A0A1W2P7J4	15.1039	WT_Early_1	WT_Early	NA	Model	NA	NA	Model	35215.5	436982	0.080588
OBJ38812_TMT10.txt	1	OBJ38812_TMT10.txt_1	129C	A0A1W2P7J4_MOUSE|A0A1W2P7J4	15.0327	WT_Early_2	WT_Early	NA	Model	NA	NA	Model	33520.2	436982	0.0767084
OBJ38812_TMT10.txt	1	OBJ38812_TMT10.txt_1	127C	A0A1W2P7J4_MOUSE|A0A1W2P7J4	15.1795	WT_Late_1	WT_Late	NA	Model	NA	NA	Model	37108.6	436982	0.0849203
OBJ38812_TMT10.txt	1	OBJ38812_TMT10.txt_1	130C	A0A1W2P7J4_MOUSE|A0A1W2P7J4	15.0021	WT_Late_2	WT_Late	NA	Model	NA	NA	Model	32814.9	436982	0.0750944
OBJ38812_TMT10.txt	1	OBJ38812_TMT10.txt_1	128C	A0A1W2P7J4_MOUSE|A0A1W2P7J4	14.9851	WT_Uninfect_1	WT_Uninfect	NA	Model	NA	NA	Model	32430.5	436982	0.0742147
OBJ38812_TMT10_p2.txt	1	OBJ38812_TMT10_p2.txt_1	127N	A0A1W2P8G5_MOUSE|A0A1W2P8G5	15.6364	KO_Early_3	KO_Early	NA	Model	NA	NA	Model	50935.2	596577	0.0853791
OBJ38812_TMT10_p2.txt	1	OBJ38812_TMT10_p2.txt_1	130N	A0A1W2P8G5_MOUSE|A0A1W2P8G5	15.7005	KO_Early_4	KO_Early	NA	Model	NA	NA	Model	53250.5	596577	0.0892601
OBJ38812_TMT10_p2.txt	1	OBJ38812_TMT10_p2.txt_1	128N	A0A1W2P8G5_MOUSE|A0A1W2P8G5	15.6418	KO_Late_3	KO_Late	NA	Model	NA	NA	Model	51126.1	596577	0.0856991
OBJ38812_TMT10_p2.txt	1	OBJ38812_TMT10_p2.txt_1	131N	A0A1W2P8G5_MOUSE|A0A1W2P8G5	15.645	KO_Late_4	KO_Late	NA	Model	NA	NA	Model	51239.1	596577	0.0858885
OBJ38812_TMT10_p2.txt	1	OBJ38812_TMT10_p2.txt_1	129N	A0A1W2P8G5_MOUSE|A0A1W2P8G5	15.767	KO_Uninfect_3	KO_Uninfect	NA	Model	NA	NA	Model	55763.6	596577	0.0934726
OBJ38812_TMT10_p2.txt	1	OBJ38812_TMT10_p2.txt_1	126C	A0A1W2P8G5_MOUSE|A0A1W2P8G5	15.4541	WT_Early_3	WT_Early	NA	Model	NA	NA	Model	44890.9	596577	0.0752474
OBJ38812_TMT10_p2.txt	1	OBJ38812_TMT10_p2.txt_1	129C	A0A1W2P8G5_MOUSE|A0A1W2P8G5	15.5221	WT_Early_4	WT_Early	NA	Model	NA	NA	Model	47056.8	596577	0.0788781
OBJ38812_TMT10_p2.txt	1	OBJ38812_TMT10_p2.txt_1	127C	A0A1W2P8G5_MOUSE|A0A1W2P8G5	15.5344	WT_Late_3	WT_Late	NA	Model	NA	NA	Model	47458.3	596577	0.079551
OBJ38812_TMT10_p2.txt	1	OBJ38812_TMT10_p2.txt_1	130C	A0A1W2P8G5_MOUSE|A0A1W2P8G5	15.5492	WT_Late_4	WT_Late	NA	Model	NA	NA	Model	47948.6	596577	0.0803729
OBJ38812_TMT10_p2.txt	1	OBJ38812_TMT10_p2.txt_1	128C	A0A1W2P8G5_MOUSE|A0A1W2P8G5	15.3881	WT_Uninfect_3	WT_Uninfect	NA	Model	NA	NA	Model	42881.1	596577	0.0718786
OBJ38812_TMT10_p2.txt	1	OBJ38812_TMT10_p2.txt_1	131C	A0A1W2P8G5_MOUSE|A0A1W2P8G5	15.7448	WT_Uninfect_4	WT_Uninfect	NA	Model	NA	NA	Model	54912.4	596577	0.0920459
OBJ38812_TMT10.txt	1	OBJ38812_TMT10.txt_1	127N	A0A1W2P8G5_MOUSE|A0A1W2P8G5	15.6374	KO_Early_1	KO_Early	NA	Model	NA	NA	Model	50972	593087	0.0859435
OBJ38812_TMT10.txt	1	OBJ38812_TMT10.txt_1	130N	A0A1W2P8G5_MOUSE|A0A1W2P8G5	15.6863	KO_Early_2	KO_Early	NA	Model	NA	NA	Model	52730	593087	0.0889076
OBJ38812_TMT10.txt	1	OBJ38812_TMT10.txt_1	128N	A0A1W2P8G5_MOUSE|A0A1W2P8G5	15.5556	KO_Late_1	KO_Late	NA	Model	NA	NA	Model	48163	593087	0.0812072
OBJ38812_TMT10.txt	1	OBJ38812_TMT10.txt_1	131N	A0A1W2P8G5_MOUSE|A0A1W2P8G5	15.6659	KO_Late_2	KO_Late	NA	Model	NA	NA	Model	51987.5	593087	0.0876557
OBJ38812_TMT10.txt	1	OBJ38812_TMT10.txt_1	129N	A0A1W2P8G5_MOUSE|A0A1W2P8G5	15.6262	KO_Uninfect_1	KO_Uninfect	NA	Model	NA	NA	Model	50576.1	593087	0.0852759
OBJ38812_TMT10.txt	1	OBJ38812_TMT10.txt_1	131C	A0A1W2P8G5_MOUSE|A0A1W2P8G5	15.675	KO_Uninfect_2	KO_Uninfect	NA	Model	NA	NA	Model	52318.7	593087	0.0882142
OBJ38812_TMT10.txt	1	OBJ38812_TMT10.txt_1	126C	A0A1W2P8G5_MOUSE|A0A1W2P8G5	15.591	WT_Early_1	WT_Early	NA	Model	NA	NA	Model	49359.5	593087	0.0832247
OBJ38812_TMT10.txt	1	OBJ38812_TMT10.txt_1	129C	A0A1W2P8G5_MOUSE|A0A1W2P8G5	15.525	WT_Early_2	WT_Early	NA	Model	NA	NA	Model	47150.4	593087	0.0794999
OBJ38812_TMT10.txt	1	OBJ38812_TMT10.txt_1	127C	A0A1W2P8G5_MOUSE|A0A1W2P8G5	15.5265	WT_Late_1	WT_Late	NA	Model	NA	NA	Model	47198.6	593087	0.0795813
OBJ38812_TMT10.txt	1	OBJ38812_TMT10.txt_1	130C	A0A1W2P8G5_MOUSE|A0A1W2P8G5	15.5554	WT_Late_2	WT_Late	NA	Model	NA	NA	Model	48154.8	593087	0.0811934
OBJ38812_TMT10.txt	1	OBJ38812_TMT10.txt_1	128C	A0A1W2P8G5_MOUSE|A0A1W2P8G5	15.4692	WT_Uninfect_1	WT_Uninfect	NA	Model	NA	NA	Model	45362.7	593087	0.0764857
OBJ38812_TMT10_p2.txt	1	OBJ38812_TMT10_p2.txt_1	127N	A0A1Y7VJM8_MOUSE|A0A1Y7VJM8	14.9933	KO_Early_3	KO_Early	NA	Model	NA	NA	Model	32615.5	433496	0.0752383
OBJ38812_TMT10_p2.txt	1	OBJ38812_TMT10_p2.txt_1	130N	A0A1Y7VJM8_MOUSE|A0A1Y7VJM8	15.1928	KO_Early_4	KO_Early	NA	Model	NA	NA	Model	37452.6	433496	0.0863966
OBJ38812_TMT10_p2.txt	1	OBJ38812_TMT10_p2.txt_1	128N	A0A1Y7VJM8_MOUSE|A0A1Y7VJM8	15.2791	KO_Late_3	KO_Late	NA	Model	NA	NA	Model	39761.7	433496	0.0917233
OBJ38812_TMT10_p2.txt	1	OBJ38812_TMT10_p2.txt_1	131N	A0A1Y7VJM8_MOUSE|A0A1Y7VJM8	15.0865	KO_Late_4	KO_Late	NA	Model	NA	NA	Model	34792.4	433496	0.08026
OBJ38812_TMT10_p2.txt	1	OBJ38812_TMT10_p2.txt_1	129N	A0A1Y7VJM8_MOUSE|A0A1Y7VJM8	14.7299	KO_Uninfect_3	KO_Uninfect	NA	Model	NA	NA	Model	27173.4	433496	0.0626843
OBJ38812_TMT10_p2.txt	1	OBJ38812_TMT10_p2.txt_1	126C	A0A1Y7VJM8_MOUSE|A0A1Y7VJM8	15.0464	WT_Early_3	WT_Early	NA	Model	NA	NA	Model	33838.3	433496	0.0780591
OBJ38812_TMT10_p2.txt	1	OBJ38812_TMT10_p2.txt_1	129C	A0A1Y7VJM8_MOUSE|A0A1Y7VJM8	14.9393	WT_Early_4	WT_Early	NA	Model	NA	NA	Model	31417.6	433496	0.072475
OBJ38812_TMT10_p2.txt	1	OBJ38812_TMT10_p2.txt_1	127C	A0A1Y7VJM8_MOUSE|A0A1Y7VJM8	14.6849	WT_Late_3	WT_Late	NA	Model	NA	NA	Model	26338.5	433496	0.0607583
OBJ38812_TMT10_p2.txt	1	OBJ38812_TMT10_p2.txt_1	130C	A0A1Y7VJM8_MOUSE|A0A1Y7VJM8	15.0248	WT_Late_4	WT_Late	NA	Model	NA	NA	Model	33335.5	433496	0.0768992
OBJ38812_TMT10_p2.txt	1	OBJ38812_TMT10_p2.txt_1	128C	A0A1Y7VJM8_MOUSE|A0A1Y7VJM8	15.8174	WT_Uninfect_3	WT_Uninfect	NA	Model	NA	NA	Model	57744.6	433496	0.133207
OBJ38812_TMT10_p2.txt	1	OBJ38812_TMT10_p2.txt_1	131C	A0A1Y7VJM8_MOUSE|A0A1Y7VJM8	15.4384	WT_Uninfect_4	WT_Uninfect	NA	Model	NA	NA	Model	44403.5	433496	0.102431
OBJ38812_TMT10_p2.txt	1	OBJ38812_TMT10_p2.txt_1	127N	A0A1Y7VLJ5_MOUSE|A0A1Y7VLJ5	14.5747	KO_Early_3	KO_Early	NA	Model	NA	NA	Model	24401.4	330251	0.0738874
OBJ38812_TMT10_p2.txt	1	OBJ38812_TMT10_p2.txt_1	130N	A0A1Y7VLJ5_MOUSE|A0A1Y7VLJ5	14.8542	KO_Early_4	KO_Early	NA	Model	NA	NA	Model	29617.6	330251	0.0896821
OBJ38812_TMT10_p2.txt	1	OBJ38812_TMT10_p2.txt_1	128N	A0A1Y7VLJ5_MOUSE|A0A1Y7VLJ5	14.2457	KO_Late_3	KO_Late	NA	Model	NA	NA	Model	19426	330251	0.0588218
OBJ38812_TMT10_p2.txt	1	OBJ38812_TMT10_p2.txt_1	131N	A0A1Y7VLJ5_MOUSE|A0A1Y7VLJ5	14.9044	KO_Late_4	KO_Late	NA	Model	NA	NA	Model	30666.6	330251	0.0928586
OBJ38812_TMT10_p2.txt	1	OBJ38812_TMT10_p2.txt_1	129N	A0A1Y7VLJ5_MOUSE|A0A1Y7VLJ5	14.4661	KO_Uninfect_3	KO_Uninfect	NA	Model	NA	NA	Model	22632	330251	0.0685297
OBJ38812_TMT10_p2.txt	1	OBJ38812_TMT10_p2.txt_1	126C	A0A1Y7VLJ5_MOUSE|A0A1Y7VLJ5	14.9842	WT_Early_3	WT_Early	NA	Model	NA	NA	Model	32410.7	330251	0.0981395
OBJ38812_TMT10_p2.txt	1	OBJ38812_TMT10_p2.txt_1	129C	A0A1Y7VLJ5_MOUSE|A0A1Y7VLJ5	14.8187	WT_Early_4	WT_Early	NA	Model	NA	NA	Model	28899.3	330251	0.0875071
OBJ38812_TMT10_p2.txt	1	OBJ38812_TMT10_p2.txt_1	127C	A0A1Y7VLJ5_MOUSE|A0A1Y7VLJ5	14.6581	WT_Late_3	WT_Late	NA	Model	NA	NA	Model	25853.6	330251	0.0782847
OBJ38812_TMT10_p2.txt	1	OBJ38812_TMT10_p2.txt_1	130C	A0A1Y7VLJ5_MOUSE|A0A1Y7VLJ5	14.4996	WT_Late_4	WT_Late	NA	Model	NA	NA	Model	23163.4	330251	0.0701389
OBJ38812_TMT10_p2.txt	1	OBJ38812_TMT10_p2.txt_1	128C	A0A1Y7VLJ5_MOUSE|A0A1Y7VLJ5	15.1641	WT_Uninfect_3	WT_Uninfect	NA	Model	NA	NA	Model	36714.2	330251	0.111171
OBJ38812_TMT10_p2.txt	1	OBJ38812_TMT10_p2.txt_1	131C	A0A1Y7VLJ5_MOUSE|A0A1Y7VLJ5	14.8502	WT_Uninfect_4	WT_Uninfect	NA	Model	NA	NA	Model	29535.5	330251	0.0894335
OBJ38812_TMT10_p2.txt	1	OBJ38812_TMT10_p2.txt_1	127N	A0A1Y7VNG3_MOUSE|A0A1Y7VNG3	15.128	KO_Early_3	KO_Early	NA	Model	NA	NA	Model	35808.3	546143	0.0655658
OBJ38812_TMT10_p2.txt	1	OBJ38812_TMT10_p2.txt_1	130N	A0A1Y7VNG3_MOUSE|A0A1Y7VNG3	15.2295	KO_Early_4	KO_Early	NA	Model	NA	NA	Model	38417.3	546143	0.0703429
OBJ38812_TMT10_p2.txt	1	OBJ38812_TMT10_p2.txt_1	128N	A0A1Y7VNG3_MOUSE|A0A1Y7VNG3	14.9969	KO_Late_3	KO_Late	NA	Model	NA	NA	Model	32697.6	546143	0.0598701
OBJ38812_TMT10_p2.txt	1	OBJ38812_TMT10_p2.txt_1	131N	A0A1Y7VNG3_MOUSE|A0A1Y7VNG3	15.1465	KO_Late_4	KO_Late	NA	Model	NA	NA	Model	36270.7	546143	0.0664124
OBJ38812_TMT10_p2.txt	1	OBJ38812_TMT10_p2.txt_1	129N	A0A1Y7VNG3_MOUSE|A0A1Y7VNG3	15.3299	KO_Uninfect_3	KO_Uninfect	NA	Model	NA	NA	Model	41186.4	546143	0.0754132
OBJ38812_TMT10_p2.txt	1	OBJ38812_TMT10_p2.txt_1	126C	A0A1Y7VNG3_MOUSE|A0A1Y7VNG3	15.6558	WT_Early_3	WT_Early	NA	Model	NA	NA	Model	51623.9	546143	0.0945245
OBJ38812_TMT10_p2.txt	1	OBJ38812_TMT10_p2.txt_1	129C	A0A1Y7VNG3_MOUSE|A0A1Y7VNG3	15.6148	WT_Early_4	WT_Early	NA	Model	NA	NA	Model	50178.1	546143	0.0918772
OBJ38812_TMT10_p2.txt	1	OBJ38812_TMT10_p2.txt_1	127C	A0A1Y7VNG3_MOUSE|A0A1Y7VNG3	15.6495	WT_Late_3	WT_Late	NA	Model	NA	NA	Model	51399.7	546143	0.094114
OBJ38812_TMT10_p2.txt	1	OBJ38812_TMT10_p2.txt_1	130C	A0A1Y7VNG3_MOUSE|A0A1Y7VNG3	15.5523	WT_Late_4	WT_Late	NA	Model	NA	NA	Model	48050.4	546143	0.0879814
OBJ38812_TMT10_p2.txt	1	OBJ38812_TMT10_p2.txt_1	128C	A0A1Y7VNG3_MOUSE|A0A1Y7VNG3	15.754	WT_Uninfect_3	WT_Uninfect	NA	Model	NA	NA	Model	55262.3	546143	0.101187
OBJ38812_TMT10_p2.txt	1	OBJ38812_TMT10_p2.txt_1	131C	A0A1Y7VNG3_MOUSE|A0A1Y7VNG3	15.9162	WT_Uninfect_4	WT_Uninfect	NA	Model	NA	NA	Model	61839.4	546143	0.113229
OBJ38812_TMT10_p2.txt	1	OBJ38812_TMT10_p2.txt_1	127N	A0AUN0_MOUSE|A0AUN0	17.8555	KO_Early_3	KO_Early	NA	Model	NA	NA	Model	237167	1.89547e+06	0.125123
OBJ38812_TMT10_p2.txt	1	OBJ38812_TMT10_p2.txt_1	130N	A0AUN0_MOUSE|A0AUN0	17.6639	KO_Early_4	KO_Early	NA	Model	NA	NA	Model	207668	1.89547e+06	0.10956
OBJ38812_TMT10_p2.txt	1	OBJ38812_TMT10_p2.txt_1	128N	A0AUN0_MOUSE|A0AUN0	17.6434	KO_Late_3	KO_Late	NA	Model	NA	NA	Model	204735	1.89547e+06	0.108012
OBJ38812_TMT10_p2.txt	1	OBJ38812_TMT10_p2.txt_1	131N	A0AUN0_MOUSE|A0AUN0	17.3963	KO_Late_4	KO_Late	NA	Model	NA	NA	Model	172510	1.89547e+06	0.0910116
OBJ38812_TMT10_p2.txt	1	OBJ38812_TMT10_p2.txt_1	129N	A0AUN0_MOUSE|A0AUN0	17.6593	KO_Uninfect_3	KO_Uninfect	NA	Model	NA	NA	Model	207003	1.89547e+06	0.109209
OBJ38812_TMT10_p2.txt	1	OBJ38812_TMT10_p2.txt_1	126C	A0AUN0_MOUSE|A0AUN0	16.8416	WT_Early_3	WT_Early	NA	Model	NA	NA	Model	117443	1.89547e+06	0.0619597
OBJ38812_TMT10_p2.txt	1	OBJ38812_TMT10_p2.txt_1	129C	A0AUN0_MOUSE|A0AUN0	16.8932	WT_Early_4	WT_Early	NA	Model	NA	NA	Model	121723	1.89547e+06	0.0642177
OBJ38812_TMT10_p2.txt	1	OBJ38812_TMT10_p2.txt_1	127C	A0AUN0_MOUSE|A0AUN0	16.9085	WT_Late_3	WT_Late	NA	Model	NA	NA	Model	123015	1.89547e+06	0.0648995
OBJ38812_TMT10_p2.txt	1	OBJ38812_TMT10_p2.txt_1	130C	A0AUN0_MOUSE|A0AUN0	16.6708	WT_Late_4	WT_Late	NA	Model	NA	NA	Model	104331	1.89547e+06	0.0550421
OBJ38812_TMT10_p2.txt	1	OBJ38812_TMT10_p2.txt_1	128C	A0AUN0_MOUSE|A0AUN0	16.7989	WT_Uninfect_3	WT_Uninfect	NA	Model	NA	NA	Model	114015	1.89547e+06	0.0601514
OBJ38812_TMT10_p2.txt	1	OBJ38812_TMT10_p2.txt_1	131C	A0AUN0_MOUSE|A0AUN0	17.008	WT_Uninfect_4	WT_Uninfect	NA	Model	NA	NA	Model	131801	1.89547e+06	0.0695348
OBJ38812_TMT10.txt	1	OBJ38812_TMT10.txt_1	127N	A0AUN0_MOUSE|A0AUN0	17.097	KO_Early_1	KO_Early	NA	Model	NA	NA	Model	140187	1.87118e+06	0.0749192
OBJ38812_TMT10.txt	1	OBJ38812_TMT10.txt_1	130N	A0AUN0_MOUSE|A0AUN0	17.0526	KO_Early_2	KO_Early	NA	Model	NA	NA	Model	135941	1.87118e+06	0.0726503
OBJ38812_TMT10.txt	1	OBJ38812_TMT10.txt_1	128N	A0AUN0_MOUSE|A0AUN0	17.087	KO_Late_1	KO_Late	NA	Model	NA	NA	Model	139219	1.87118e+06	0.0744017
OBJ38812_TMT10.txt	1	OBJ38812_TMT10.txt_1	131N	A0AUN0_MOUSE|A0AUN0	17.0295	KO_Late_2	KO_Late	NA	Model	NA	NA	Model	133776	1.87118e+06	0.0714929
OBJ38812_TMT10.txt	1	OBJ38812_TMT10.txt_1	129N	A0AUN0_MOUSE|A0AUN0	17.3298	KO_Uninfect_1	KO_Uninfect	NA	Model	NA	NA	Model	164740	1.87118e+06	0.088041
OBJ38812_TMT10.txt	1	OBJ38812_TMT10.txt_1	131C	A0AUN0_MOUSE|A0AUN0	17.3287	KO_Uninfect_2	KO_Uninfect	NA	Model	NA	NA	Model	164609	1.87118e+06	0.0879709
OBJ38812_TMT10.txt	1	OBJ38812_TMT10.txt_1	126C	A0AUN0_MOUSE|A0AUN0	17.1627	WT_Early_1	WT_Early	NA	Model	NA	NA	Model	146716	1.87118e+06	0.0784085
OBJ38812_TMT10.txt	1	OBJ38812_TMT10.txt_1	129C	A0AUN0_MOUSE|A0AUN0	17.3876	WT_Early_2	WT_Early	NA	Model	NA	NA	Model	171470	1.87118e+06	0.0916375
OBJ38812_TMT10.txt	1	OBJ38812_TMT10.txt_1	127C	A0AUN0_MOUSE|A0AUN0	17.1624	WT_Late_1	WT_Late	NA	Model	NA	NA	Model	146684	1.87118e+06	0.0783915
OBJ38812_TMT10.txt	1	OBJ38812_TMT10.txt_1	130C	A0AUN0_MOUSE|A0AUN0	17.4806	WT_Late_2	WT_Late	NA	Model	NA	NA	Model	182890	1.87118e+06	0.0977409
OBJ38812_TMT10.txt	1	OBJ38812_TMT10.txt_1	128C	A0AUN0_MOUSE|A0AUN0	17.5423	WT_Uninfect_1	WT_Uninfect	NA	Model	NA	NA	Model	190882	1.87118e+06	0.102012
OBJ38812_TMT10_p2.txt	1	OBJ38812_TMT10_p2.txt_1	127N	A0JLN1_MOUSE|A0JLN1	15.6762	KO_Early_3	KO_Early	NA	Model	NA	NA	Model	52359.8	651693	0.0803443
OBJ38812_TMT10_p2.txt	1	OBJ38812_TMT10_p2.txt_1	130N	A0JLN1_MOUSE|A0JLN1	15.7995	KO_Early_4	KO_Early	NA	Model	NA	NA	Model	57032.3	651693	0.0875142
OBJ38812_TMT10_p2.txt	1	OBJ38812_TMT10_p2.txt_1	128N	A0JLN1_MOUSE|A0JLN1	15.6245	KO_Late_3	KO_Late	NA	Model	NA	NA	Model	50519.2	651693	0.07752
OBJ38812_TMT10_p2.txt	1	OBJ38812_TMT10_p2.txt_1	131N	A0JLN1_MOUSE|A0JLN1	15.546	KO_Late_4	KO_Late	NA	Model	NA	NA	Model	47843.5	651693	0.0734143
OBJ38812_TMT10_p2.txt	1	OBJ38812_TMT10_p2.txt_1	129N	A0JLN1_MOUSE|A0JLN1	15.7762	KO_Uninfect_3	KO_Uninfect	NA	Model	NA	NA	Model	56117.3	651693	0.0861101
OBJ38812_TMT10_p2.txt	1	OBJ38812_TMT10_p2.txt_1	126C	A0JLN1_MOUSE|A0JLN1	15.6996	WT_Early_3	WT_Early	NA	Model	NA	NA	Model	53216	651693	0.0816582
OBJ38812_TMT10_p2.txt	1	OBJ38812_TMT10_p2.txt_1	129C	A0JLN1_MOUSE|A0JLN1	15.7981	WT_Early_4	WT_Early	NA	Model	NA	NA	Model	56976	651693	0.0874277
OBJ38812_TMT10_p2.txt	1	OBJ38812_TMT10_p2.txt_1	127C	A0JLN1_MOUSE|A0JLN1	15.751	WT_Late_3	WT_Late	NA	Model	NA	NA	Model	55147	651693	0.0846213
OBJ38812_TMT10_p2.txt	1	OBJ38812_TMT10_p2.txt_1	130C	A0JLN1_MOUSE|A0JLN1	15.7427	WT_Late_4	WT_Late	NA	Model	NA	NA	Model	54829.6	651693	0.0841342
OBJ38812_TMT10_p2.txt	1	OBJ38812_TMT10_p2.txt_1	128C	A0JLN1_MOUSE|A0JLN1	15.6269	WT_Uninfect_3	WT_Uninfect	NA	Model	NA	NA	Model	50600	651693	0.077644
OBJ38812_TMT10_p2.txt	1	OBJ38812_TMT10_p2.txt_1	131C	A0JLN1_MOUSE|A0JLN1	15.9583	WT_Uninfect_4	WT_Uninfect	NA	Model	NA	NA	Model	63670	651693	0.0976995
OBJ38812_TMT10.txt	1	OBJ38812_TMT10.txt_1	127N	A0JLN1_MOUSE|A0JLN1	15.7367	KO_Early_1	KO_Early	NA	Model	NA	NA	Model	54602.2	643797	0.0848128
OBJ38812_TMT10.txt	1	OBJ38812_TMT10.txt_1	130N	A0JLN1_MOUSE|A0JLN1	15.6644	KO_Early_2	KO_Early	NA	Model	NA	NA	Model	51932.8	643797	0.0806664
OBJ38812_TMT10.txt	1	OBJ38812_TMT10.txt_1	128N	A0JLN1_MOUSE|A0JLN1	15.8064	KO_Late_1	KO_Late	NA	Model	NA	NA	Model	57304.8	643797	0.0890107
OBJ38812_TMT10.txt	1	OBJ38812_TMT10.txt_1	131N	A0JLN1_MOUSE|A0JLN1	15.6845	KO_Late_2	KO_Late	NA	Model	NA	NA	Model	52662.3	643797	0.0817995
OBJ38812_TMT10.txt	1	OBJ38812_TMT10.txt_1	129N	A0JLN1_MOUSE|A0JLN1	15.6438	KO_Uninfect_1	KO_Uninfect	NA	Model	NA	NA	Model	51197.8	643797	0.0795247
OBJ38812_TMT10.txt	1	OBJ38812_TMT10.txt_1	131C	A0JLN1_MOUSE|A0JLN1	15.7749	KO_Uninfect_2	KO_Uninfect	NA	Model	NA	NA	Model	56069.3	643797	0.0870915
OBJ38812_TMT10.txt	1	OBJ38812_TMT10.txt_1	126C	A0JLN1_MOUSE|A0JLN1	15.7242	WT_Early_1	WT_Early	NA	Model	NA	NA	Model	54132.4	643797	0.084083
OBJ38812_TMT10.txt	1	OBJ38812_TMT10.txt_1	129C	A0JLN1_MOUSE|A0JLN1	15.7981	WT_Early_2	WT_Early	NA	Model	NA	NA	Model	56978.1	643797	0.0885032
OBJ38812_TMT10.txt	1	OBJ38812_TMT10.txt_1	127C	A0JLN1_MOUSE|A0JLN1	15.7225	WT_Late_1	WT_Late	NA	Model	NA	NA	Model	54067.5	643797	0.0839822
OBJ38812_TMT10.txt	1	OBJ38812_TMT10.txt_1	130C	A0JLN1_MOUSE|A0JLN1	15.6726	WT_Late_2	WT_Late	NA	Model	NA	NA	Model	52229.5	643797	0.0811273
OBJ38812_TMT10.txt	1	OBJ38812_TMT10.txt_1	128C	A0JLN1_MOUSE|A0JLN1	15.5875	WT_Uninfect_1	WT_Uninfect	NA	Model	NA	NA	Model	49238.7	643797	0.0764818
OBJ38812_TMT10_p2.txt	1	OBJ38812_TMT10_p2.txt_1	127N	A0JLR7_MOUSE|A0JLR7	17.4051	KO_Early_3	KO_Early	NA	Model	NA	NA	Model	173564	2.41697e+06	0.0718104
OBJ38812_TMT10_p2.txt	1	OBJ38812_TMT10_p2.txt_1	130N	A0JLR7_MOUSE|A0JLR7	17.6841	KO_Early_4	KO_Early	NA	Model	NA	NA	Model	210590	2.41697e+06	0.0871299
OBJ38812_TMT10_p2.txt	1	OBJ38812_TMT10_p2.txt_1	128N	A0JLR7_MOUSE|A0JLR7	17.4724	KO_Late_3	KO_Late	NA	Model	NA	NA	Model	181852	2.41697e+06	0.0752396
OBJ38812_TMT10_p2.txt	1	OBJ38812_TMT10_p2.txt_1	131N	A0JLR7_MOUSE|A0JLR7	17.6326	KO_Late_4	KO_Late	NA	Model	NA	NA	Model	203212	2.41697e+06	0.0840773
OBJ38812_TMT10_p2.txt	1	OBJ38812_TMT10_p2.txt_1	129N	A0JLR7_MOUSE|A0JLR7	17.6101	KO_Uninfect_3	KO_Uninfect	NA	Model	NA	NA	Model	200059	2.41697e+06	0.0827727
OBJ38812_TMT10_p2.txt	1	OBJ38812_TMT10_p2.txt_1	126C	A0JLR7_MOUSE|A0JLR7	17.6321	WT_Early_3	WT_Early	NA	Model	NA	NA	Model	203140	2.41697e+06	0.0840473
OBJ38812_TMT10_p2.txt	1	OBJ38812_TMT10_p2.txt_1	129C	A0JLR7_MOUSE|A0JLR7	17.6679	WT_Early_4	WT_Early	NA	Model	NA	NA	Model	208240	2.41697e+06	0.0861575
OBJ38812_TMT10_p2.txt	1	OBJ38812_TMT10_p2.txt_1	127C	A0JLR7_MOUSE|A0JLR7	17.6102	WT_Late_3	WT_Late	NA	Model	NA	NA	Model	200079	2.41697e+06	0.0827808
OBJ38812_TMT10_p2.txt	1	OBJ38812_TMT10_p2.txt_1	130C	A0JLR7_MOUSE|A0JLR7	17.7001	WT_Late_4	WT_Late	NA	Model	NA	NA	Model	212947	2.41697e+06	0.088105
OBJ38812_TMT10_p2.txt	1	OBJ38812_TMT10_p2.txt_1	128C	A0JLR7_MOUSE|A0JLR7	17.5498	WT_Uninfect_3	WT_Uninfect	NA	Model	NA	NA	Model	191871	2.41697e+06	0.0793849
OBJ38812_TMT10_p2.txt	1	OBJ38812_TMT10_p2.txt_1	131C	A0JLR7_MOUSE|A0JLR7	17.8314	WT_Uninfect_4	WT_Uninfect	NA	Model	NA	NA	Model	233238	2.41697e+06	0.0965002
OBJ38812_TMT10.txt	1	OBJ38812_TMT10.txt_1	127N	A0JLR7_MOUSE|A0JLR7	17.4382	KO_Early_1	KO_Early	NA	Model	NA	NA	Model	177587	2.38547e+06	0.0744451
OBJ38812_TMT10.txt	1	OBJ38812_TMT10.txt_1	130N	A0JLR7_MOUSE|A0JLR7	17.486	KO_Early_2	KO_Early	NA	Model	NA	NA	Model	183567	2.38547e+06	0.0769522
OBJ38812_TMT10.txt	1	OBJ38812_TMT10.txt_1	128N	A0JLR7_MOUSE|A0JLR7	17.4001	KO_Late_1	KO_Late	NA	Model	NA	NA	Model	172968	2.38547e+06	0.0725089
OBJ38812_TMT10.txt	1	OBJ38812_TMT10.txt_1	131N	A0JLR7_MOUSE|A0JLR7	17.5138	KO_Late_2	KO_Late	NA	Model	NA	NA	Model	187144	2.38547e+06	0.0784517
OBJ38812_TMT10.txt	1	OBJ38812_TMT10.txt_1	129N	A0JLR7_MOUSE|A0JLR7	17.5059	KO_Uninfect_1	KO_Uninfect	NA	Model	NA	NA	Model	186127	2.38547e+06	0.0780253
OBJ38812_TMT10.txt	1	OBJ38812_TMT10.txt_1	131C	A0JLR7_MOUSE|A0JLR7	17.5626	KO_Uninfect_2	KO_Uninfect	NA	Model	NA	NA	Model	193582	2.38547e+06	0.0811503
OBJ38812_TMT10.txt	1	OBJ38812_TMT10.txt_1	126C	A0JLR7_MOUSE|A0JLR7	17.6641	WT_Early_1	WT_Early	NA	Model	NA	NA	Model	207698	2.38547e+06	0.0870678
OBJ38812_TMT10.txt	1	OBJ38812_TMT10.txt_1	129C	A0JLR7_MOUSE|A0JLR7	17.8228	WT_Early_2	WT_Early	NA	Model	NA	NA	Model	231848	2.38547e+06	0.0971917
OBJ38812_TMT10.txt	1	OBJ38812_TMT10.txt_1	127C	A0JLR7_MOUSE|A0JLR7	17.6097	WT_Late_1	WT_Late	NA	Model	NA	NA	Model	200002	2.38547e+06	0.0838418
OBJ38812_TMT10.txt	1	OBJ38812_TMT10.txt_1	130C	A0JLR7_MOUSE|A0JLR7	17.9068	WT_Late_2	WT_Late	NA	Model	NA	NA	Model	245745	2.38547e+06	0.103017
OBJ38812_TMT10.txt	1	OBJ38812_TMT10.txt_1	128C	A0JLR7_MOUSE|A0JLR7	17.617	WT_Uninfect_1	WT_Uninfect	NA	Model	NA	NA	Model	201026	2.38547e+06	0.0842707
OBJ38812_TMT10_p2.txt	1	OBJ38812_TMT10_p2.txt_1	127N	A16A1_MOUSE|Q571I9	16.1141	KO_Early_3	KO_Early	NA	Model	NA	NA	Model	70930	929753	0.0762891
OBJ38812_TMT10_p2.txt	1	OBJ38812_TMT10_p2.txt_1	130N	A16A1_MOUSE|Q571I9	16.098	KO_Early_4	KO_Early	NA	Model	NA	NA	Model	70140.2	929753	0.0754396
OBJ38812_TMT10_p2.txt	1	OBJ38812_TMT10_p2.txt_1	128N	A16A1_MOUSE|Q571I9	16.0609	KO_Late_3	KO_Late	NA	Model	NA	NA	Model	68361	929753	0.0735259
OBJ38812_TMT10_p2.txt	1	OBJ38812_TMT10_p2.txt_1	131N	A16A1_MOUSE|Q571I9	16.0999	KO_Late_4	KO_Late	NA	Model	NA	NA	Model	70232.6	929753	0.075539
OBJ38812_TMT10_p2.txt	1	OBJ38812_TMT10_p2.txt_1	129N	A16A1_MOUSE|Q571I9	16.193	KO_Uninfect_3	KO_Uninfect	NA	Model	NA	NA	Model	74915.5	929753	0.0805757
OBJ38812_TMT10_p2.txt	1	OBJ38812_TMT10_p2.txt_1	126C	A16A1_MOUSE|Q571I9	16.3774	WT_Early_3	WT_Early	NA	Model	NA	NA	Model	85131.8	929753	0.0915638
OBJ38812_TMT10_p2.txt	1	OBJ38812_TMT10_p2.txt_1	129C	A16A1_MOUSE|Q571I9	16.4019	WT_Early_4	WT_Early	NA	Model	NA	NA	Model	86590.1	929753	0.0931324
OBJ38812_TMT10_p2.txt	1	OBJ38812_TMT10_p2.txt_1	127C	A16A1_MOUSE|Q571I9	16.424	WT_Late_3	WT_Late	NA	Model	NA	NA	Model	87925.9	929753	0.0945691
OBJ38812_TMT10_p2.txt	1	OBJ38812_TMT10_p2.txt_1	130C	A16A1_MOUSE|Q571I9	16.2915	WT_Late_4	WT_Late	NA	Model	NA	NA	Model	80212.2	929753	0.0862726
OBJ38812_TMT10_p2.txt	1	OBJ38812_TMT10_p2.txt_1	128C	A16A1_MOUSE|Q571I9	16.1205	WT_Uninfect_3	WT_Uninfect	NA	Model	NA	NA	Model	71243.9	929753	0.0766267
OBJ38812_TMT10_p2.txt	1	OBJ38812_TMT10_p2.txt_1	131C	A16A1_MOUSE|Q571I9	16.4226	WT_Uninfect_4	WT_Uninfect	NA	Model	NA	NA	Model	87837.9	929753	0.0944745
OBJ38812_TMT10.txt	1	OBJ38812_TMT10.txt_1	127N	A16A1_MOUSE|Q571I9	16.143	KO_Early_1	KO_Early	NA	Model	NA	NA	Model	72363.5	913419	0.0792226
OBJ38812_TMT10.txt	1	OBJ38812_TMT10.txt_1	130N	A16A1_MOUSE|Q571I9	16.1828	KO_Early_2	KO_Early	NA	Model	NA	NA	Model	74391	913419	0.0814423
OBJ38812_TMT10.txt	1	OBJ38812_TMT10.txt_1	128N	A16A1_MOUSE|Q571I9	16.074	KO_Late_1	KO_Late	NA	Model	NA	NA	Model	68986.6	913419	0.0755256
OBJ38812_TMT10.txt	1	OBJ38812_TMT10.txt_1	131N	A16A1_MOUSE|Q571I9	15.9746	KO_Late_2	KO_Late	NA	Model	NA	NA	Model	64393.6	913419	0.0704973
OBJ38812_TMT10.txt	1	OBJ38812_TMT10.txt_1	129N	A16A1_MOUSE|Q571I9	16.0045	KO_Uninfect_1	KO_Uninfect	NA	Model	NA	NA	Model	65739.1	913419	0.0719704
OBJ38812_TMT10.txt	1	OBJ38812_TMT10.txt_1	131C	A16A1_MOUSE|Q571I9	16.0966	KO_Uninfect_2	KO_Uninfect	NA	Model	NA	NA	Model	70075.9	913419	0.0767182
OBJ38812_TMT10.txt	1	OBJ38812_TMT10.txt_1	126C	A16A1_MOUSE|Q571I9	16.4309	WT_Early_1	WT_Early	NA	Model	NA	NA	Model	88350.3	913419	0.0967247
OBJ38812_TMT10.txt	1	OBJ38812_TMT10.txt_1	129C	A16A1_MOUSE|Q571I9	16.4681	WT_Early_2	WT_Early	NA	Model	NA	NA	Model	90657.2	913419	0.0992503
OBJ38812_TMT10.txt	1	OBJ38812_TMT10.txt_1	127C	A16A1_MOUSE|Q571I9	16.3103	WT_Late_1	WT_Late	NA	Model	NA	NA	Model	81259.6	913419	0.088962
OBJ38812_TMT10.txt	1	OBJ38812_TMT10.txt_1	130C	A16A1_MOUSE|Q571I9	16.2899	WT_Late_2	WT_Late	NA	Model	NA	NA	Model	80123	913419	0.0877176
OBJ38812_TMT10.txt	1	OBJ38812_TMT10.txt_1	128C	A16A1_MOUSE|Q571I9	16.3029	WT_Uninfect_1	WT_Uninfect	NA	Model	NA	NA	Model	80847.7	913419	0.0885111
OBJ38812_TMT10_p2.txt	1	OBJ38812_TMT10_p2.txt_1	127N	A16L1_MOUSE|Q8C0J2	14.2341	KO_Early_3	KO_Early	NA	Model	NA	NA	Model	19269.8	629878	0.0305929
OBJ38812_TMT10_p2.txt	1	OBJ38812_TMT10_p2.txt_1	130N	A16L1_MOUSE|Q8C0J2	14.0707	KO_Early_4	KO_Early	NA	Model	NA	NA	Model	17207.4	629878	0.0273185
OBJ38812_TMT10_p2.txt	1	OBJ38812_TMT10_p2.txt_1	128N	A16L1_MOUSE|Q8C0J2	14.3363	KO_Late_3	KO_Late	NA	Model	NA	NA	Model	20684.7	629878	0.0328392
OBJ38812_TMT10_p2.txt	1	OBJ38812_TMT10_p2.txt_1	131N	A16L1_MOUSE|Q8C0J2	14.341	KO_Late_4	KO_Late	NA	Model	NA	NA	Model	20752.4	629878	0.0329467
OBJ38812_TMT10_p2.txt	1	OBJ38812_TMT10_p2.txt_1	129N	A16L1_MOUSE|Q8C0J2	14.1392	KO_Uninfect_3	KO_Uninfect	NA	Model	NA	NA	Model	18044.1	629878	0.028647
OBJ38812_TMT10_p2.txt	1	OBJ38812_TMT10_p2.txt_1	126C	A16L1_MOUSE|Q8C0J2	16.295	WT_Early_3	WT_Early	NA	Model	NA	NA	Model	80402.7	629878	0.127648
OBJ38812_TMT10_p2.txt	1	OBJ38812_TMT10_p2.txt_1	129C	A16L1_MOUSE|Q8C0J2	16.3718	WT_Early_4	WT_Early	NA	Model	NA	NA	Model	84799.6	629878	0.134629
OBJ38812_TMT10_p2.txt	1	OBJ38812_TMT10_p2.txt_1	127C	A16L1_MOUSE|Q8C0J2	16.2963	WT_Late_3	WT_Late	NA	Model	NA	NA	Model	80475.2	629878	0.127763
OBJ38812_TMT10_p2.txt	1	OBJ38812_TMT10_p2.txt_1	130C	A16L1_MOUSE|Q8C0J2	16.3726	WT_Late_4	WT_Late	NA	Model	NA	NA	Model	84851	629878	0.13471
OBJ38812_TMT10_p2.txt	1	OBJ38812_TMT10_p2.txt_1	128C	A16L1_MOUSE|Q8C0J2	16.2109	WT_Uninfect_3	WT_Uninfect	NA	Model	NA	NA	Model	75849.8	629878	0.12042
OBJ38812_TMT10_p2.txt	1	OBJ38812_TMT10_p2.txt_1	131C	A16L1_MOUSE|Q8C0J2	16.4271	WT_Uninfect_4	WT_Uninfect	NA	Model	NA	NA	Model	88117.7	629878	0.139896
OBJ38812_TMT10.txt	1	OBJ38812_TMT10.txt_1	127N	A16L1_MOUSE|Q8C0J2	14.0873	KO_Early_1	KO_Early	NA	Model	NA	NA	Model	17405.9	583391	0.0298358
OBJ38812_TMT10.txt	1	OBJ38812_TMT10.txt_1	130N	A16L1_MOUSE|Q8C0J2	14.5156	KO_Early_2	KO_Early	NA	Model	NA	NA	Model	23421.7	583391	0.0401476
OBJ38812_TMT10.txt	1	OBJ38812_TMT10.txt_1	128N	A16L1_MOUSE|Q8C0J2	14.0365	KO_Late_1	KO_Late	NA	Model	NA	NA	Model	16804.3	583391	0.0288046
OBJ38812_TMT10.txt	1	OBJ38812_TMT10.txt_1	131N	A16L1_MOUSE|Q8C0J2	14.2327	KO_Late_2	KO_Late	NA	Model	NA	NA	Model	19251.9	583391	0.033
OBJ38812_TMT10.txt	1	OBJ38812_TMT10.txt_1	129N	A16L1_MOUSE|Q8C0J2	13.8215	KO_Uninfect_1	KO_Uninfect	NA	Model	NA	NA	Model	14476.9	583391	0.0248151
OBJ38812_TMT10.txt	1	OBJ38812_TMT10.txt_1	131C	A16L1_MOUSE|Q8C0J2	14.2701	KO_Uninfect_2	KO_Uninfect	NA	Model	NA	NA	Model	19757.2	583391	0.0338662
OBJ38812_TMT10.txt	1	OBJ38812_TMT10.txt_1	126C	A16L1_MOUSE|Q8C0J2	16.3871	WT_Early_1	WT_Early	NA	Model	NA	NA	Model	85704.7	583391	0.146908
OBJ38812_TMT10.txt	1	OBJ38812_TMT10.txt_1	129C	A16L1_MOUSE|Q8C0J2	16.6207	WT_Early_2	WT_Early	NA	Model	NA	NA	Model	100773	583391	0.172736
OBJ38812_TMT10.txt	1	OBJ38812_TMT10.txt_1	127C	A16L1_MOUSE|Q8C0J2	16.4185	WT_Late_1	WT_Late	NA	Model	NA	NA	Model	87592.9	583391	0.150145
OBJ38812_TMT10.txt	1	OBJ38812_TMT10.txt_1	130C	A16L1_MOUSE|Q8C0J2	16.3627	WT_Late_2	WT_Late	NA	Model	NA	NA	Model	84266.6	583391	0.144443
OBJ38812_TMT10.txt	1	OBJ38812_TMT10.txt_1	128C	A16L1_MOUSE|Q8C0J2	16.1852	WT_Uninfect_1	WT_Uninfect	NA	Model	NA	NA	Model	74512.1	583391	0.127722
OBJ38812_TMT10_p2.txt	1	OBJ38812_TMT10_p2.txt_1	127N	A1CF_MOUSE|Q5YD48	18.0315	KO_Early_3	KO_Early	NA	Model	NA	NA	Model	267923	2.38799e+06	0.112196
OBJ38812_TMT10_p2.txt	1	OBJ38812_TMT10_p2.txt_1	130N	A1CF_MOUSE|Q5YD48	16.8247	KO_Early_4	KO_Early	NA	Model	NA	NA	Model	116076	2.38799e+06	0.048608
OBJ38812_TMT10_p2.txt	1	OBJ38812_TMT10_p2.txt_1	128N	A1CF_MOUSE|Q5YD48	17.86	KO_Late_3	KO_Late	NA	Model	NA	NA	Model	237906	2.38799e+06	0.0996259
OBJ38812_TMT10_p2.txt	1	OBJ38812_TMT10_p2.txt_1	131N	A1CF_MOUSE|Q5YD48	17.7667	KO_Late_4	KO_Late	NA	Model	NA	NA	Model	223001	2.38799e+06	0.0933844
OBJ38812_TMT10_p2.txt	1	OBJ38812_TMT10_p2.txt_1	129N	A1CF_MOUSE|Q5YD48	17.7271	KO_Uninfect_3	KO_Uninfect	NA	Model	NA	NA	Model	216965	2.38799e+06	0.0908568
OBJ38812_TMT10_p2.txt	1	OBJ38812_TMT10_p2.txt_1	126C	A1CF_MOUSE|Q5YD48	17.1721	WT_Early_3	WT_Early	NA	Model	NA	NA	Model	147679	2.38799e+06	0.0618421
OBJ38812_TMT10_p2.txt	1	OBJ38812_TMT10_p2.txt_1	129C	A1CF_MOUSE|Q5YD48	17.5744	WT_Early_4	WT_Early	NA	Model	NA	NA	Model	195180	2.38799e+06	0.0817341
OBJ38812_TMT10_p2.txt	1	OBJ38812_TMT10_p2.txt_1	127C	A1CF_MOUSE|Q5YD48	17.3613	WT_Late_3	WT_Late	NA	Model	NA	NA	Model	168372	2.38799e+06	0.0705075
OBJ38812_TMT10_p2.txt	1	OBJ38812_TMT10_p2.txt_1	130C	A1CF_MOUSE|Q5YD48	18.0578	WT_Late_4	WT_Late	NA	Model	NA	NA	Model	272859	2.38799e+06	0.114263
OBJ38812_TMT10_p2.txt	1	OBJ38812_TMT10_p2.txt_1	128C	A1CF_MOUSE|Q5YD48	18.2901	WT_Uninfect_3	WT_Uninfect	NA	Model	NA	NA	Model	320523	2.38799e+06	0.134223
OBJ38812_TMT10_p2.txt	1	OBJ38812_TMT10_p2.txt_1	131C	A1CF_MOUSE|Q5YD48	13.7163	WT_Uninfect_4	WT_Uninfect	NA	Model	NA	NA	Model	13459.6	2.38799e+06	0.00563635
OBJ38812_TMT10_p2.txt	1	OBJ38812_TMT10_p2.txt_1	127N	A1L341_MOUSE|A1L341	11.7221	KO_Early_3	KO_Early	NA	Model	NA	NA	Model	3378.42	45745.8	0.073852
OBJ38812_TMT10_p2.txt	1	OBJ38812_TMT10_p2.txt_1	130N	A1L341_MOUSE|A1L341	11.706	KO_Early_4	KO_Early	NA	Model	NA	NA	Model	3340.86	45745.8	0.073031
OBJ38812_TMT10_p2.txt	1	OBJ38812_TMT10_p2.txt_1	128N	A1L341_MOUSE|A1L341	12.0144	KO_Late_3	KO_Late	NA	Model	NA	NA	Model	4136.98	45745.8	0.0904342
OBJ38812_TMT10_p2.txt	1	OBJ38812_TMT10_p2.txt_1	131N	A1L341_MOUSE|A1L341	12.0056	KO_Late_4	KO_Late	NA	Model	NA	NA	Model	4112.03	45745.8	0.0898887
OBJ38812_TMT10_p2.txt	1	OBJ38812_TMT10_p2.txt_1	129N	A1L341_MOUSE|A1L341	11.7442	KO_Uninfect_3	KO_Uninfect	NA	Model	NA	NA	Model	3430.61	45745.8	0.074993
OBJ38812_TMT10_p2.txt	1	OBJ38812_TMT10_p2.txt_1	126C	A1L341_MOUSE|A1L341	11.8932	WT_Early_3	WT_Early	NA	Model	NA	NA	Model	3803.72	45745.8	0.0831492
OBJ38812_TMT10_p2.txt	1	OBJ38812_TMT10_p2.txt_1	129C	A1L341_MOUSE|A1L341	11.7482	WT_Early_4	WT_Early	NA	Model	NA	NA	Model	3439.96	45745.8	0.0751974
OBJ38812_TMT10_p2.txt	1	OBJ38812_TMT10_p2.txt_1	127C	A1L341_MOUSE|A1L341	11.9729	WT_Late_3	WT_Late	NA	Model	NA	NA	Model	4019.68	45745.8	0.08787
OBJ38812_TMT10_p2.txt	1	OBJ38812_TMT10_p2.txt_1	130C	A1L341_MOUSE|A1L341	12.3649	WT_Late_4	WT_Late	NA	Model	NA	NA	Model	5274.86	45745.8	0.115308
OBJ38812_TMT10_p2.txt	1	OBJ38812_TMT10_p2.txt_1	128C	A1L341_MOUSE|A1L341	11.4148	WT_Uninfect_3	WT_Uninfect	NA	Model	NA	NA	Model	2730.21	45745.8	0.0596822
OBJ38812_TMT10_p2.txt	1	OBJ38812_TMT10_p2.txt_1	131C	A1L341_MOUSE|A1L341	12.0917	WT_Uninfect_4	WT_Uninfect	NA	Model	NA	NA	Model	4364.75	45745.8	0.0954131
OBJ38812_TMT10_p2.txt	1	OBJ38812_TMT10_p2.txt_1	127N	A1L3P4_MOUSE|A1L3P4	15.9971	KO_Early_3	KO_Early	NA	Model	NA	NA	Model	65406.6	829113	0.0788874
OBJ38812_TMT10_p2.txt	1	OBJ38812_TMT10_p2.txt_1	130N	A1L3P4_MOUSE|A1L3P4	15.7537	KO_Early_4	KO_Early	NA	Model	NA	NA	Model	55249.2	829113	0.0666366
OBJ38812_TMT10_p2.txt	1	OBJ38812_TMT10_p2.txt_1	128N	A1L3P4_MOUSE|A1L3P4	15.9762	KO_Late_3	KO_Late	NA	Model	NA	NA	Model	64462.6	829113	0.0777489
OBJ38812_TMT10_p2.txt	1	OBJ38812_TMT10_p2.txt_1	131N	A1L3P4_MOUSE|A1L3P4	16.1669	KO_Late_4	KO_Late	NA	Model	NA	NA	Model	73572	829113	0.0887358
OBJ38812_TMT10_p2.txt	1	OBJ38812_TMT10_p2.txt_1	129N	A1L3P4_MOUSE|A1L3P4	16.0765	KO_Uninfect_3	KO_Uninfect	NA	Model	NA	NA	Model	69105.7	829113	0.083349
OBJ38812_TMT10_p2.txt	1	OBJ38812_TMT10_p2.txt_1	126C	A1L3P4_MOUSE|A1L3P4	16.1521	WT_Early_3	WT_Early	NA	Model	NA	NA	Model	72821.2	829113	0.0878303
OBJ38812_TMT10_p2.txt	1	OBJ38812_TMT10_p2.txt_1	129C	A1L3P4_MOUSE|A1L3P4	15.7801	WT_Early_4	WT_Early	NA	Model	NA	NA	Model	56272.4	829113	0.0678706
OBJ38812_TMT10_p2.txt	1	OBJ38812_TMT10_p2.txt_1	127C	A1L3P4_MOUSE|A1L3P4	16.1095	WT_Late_3	WT_Late	NA	Model	NA	NA	Model	70704.2	829113	0.085277
OBJ38812_TMT10_p2.txt	1	OBJ38812_TMT10_p2.txt_1	130C	A1L3P4_MOUSE|A1L3P4	15.9027	WT_Late_4	WT_Late	NA	Model	NA	NA	Model	61261.9	829113	0.0738885
OBJ38812_TMT10_p2.txt	1	OBJ38812_TMT10_p2.txt_1	128C	A1L3P4_MOUSE|A1L3P4	16.9496	WT_Uninfect_3	WT_Uninfect	NA	Model	NA	NA	Model	126569	829113	0.152656
OBJ38812_TMT10_p2.txt	1	OBJ38812_TMT10_p2.txt_1	131C	A1L3P4_MOUSE|A1L3P4	15.4287	WT_Uninfect_4	WT_Uninfect	NA	Model	NA	NA	Model	44105.1	829113	0.0531955
OBJ38812_TMT10.txt	1	OBJ38812_TMT10.txt_1	127N	A1L3P4_MOUSE|A1L3P4	16.1164	KO_Early_1	KO_Early	NA	Model	NA	NA	Model	71044	836317	0.0849486
OBJ38812_TMT10.txt	1	OBJ38812_TMT10.txt_1	130N	A1L3P4_MOUSE|A1L3P4	16.0167	KO_Early_2	KO_Early	NA	Model	NA	NA	Model	66298.6	836317	0.0792746
OBJ38812_TMT10.txt	1	OBJ38812_TMT10.txt_1	128N	A1L3P4_MOUSE|A1L3P4	16.1494	KO_Late_1	KO_Late	NA	Model	NA	NA	Model	72685.4	836317	0.0869114
OBJ38812_TMT10.txt	1	OBJ38812_TMT10.txt_1	131N	A1L3P4_MOUSE|A1L3P4	15.9425	KO_Late_2	KO_Late	NA	Model	NA	NA	Model	62976.7	836317	0.0753025
OBJ38812_TMT10.txt	1	OBJ38812_TMT10.txt_1	129N	A1L3P4_MOUSE|A1L3P4	16.234	KO_Uninfect_1	KO_Uninfect	NA	Model	NA	NA	Model	77075.3	836317	0.0921604
OBJ38812_TMT10.txt	1	OBJ38812_TMT10.txt_1	131C	A1L3P4_MOUSE|A1L3P4	16.0855	KO_Uninfect_2	KO_Uninfect	NA	Model	NA	NA	Model	69537.6	836317	0.0831474
OBJ38812_TMT10.txt	1	OBJ38812_TMT10.txt_1	126C	A1L3P4_MOUSE|A1L3P4	16.0297	WT_Early_1	WT_Early	NA	Model	NA	NA	Model	66897.6	836317	0.0799908
OBJ38812_TMT10.txt	1	OBJ38812_TMT10.txt_1	129C	A1L3P4_MOUSE|A1L3P4	16.0082	WT_Early_2	WT_Early	NA	Model	NA	NA	Model	65911	836317	0.078811
OBJ38812_TMT10.txt	1	OBJ38812_TMT10.txt_1	127C	A1L3P4_MOUSE|A1L3P4	16.1263	WT_Late_1	WT_Late	NA	Model	NA	NA	Model	71532.4	836317	0.0855326
OBJ38812_TMT10.txt	1	OBJ38812_TMT10.txt_1	130C	A1L3P4_MOUSE|A1L3P4	16.0304	WT_Late_2	WT_Late	NA	Model	NA	NA	Model	66932.7	836317	0.0800327
OBJ38812_TMT10.txt	1	OBJ38812_TMT10.txt_1	128C	A1L3P4_MOUSE|A1L3P4	16.2107	WT_Uninfect_1	WT_Uninfect	NA	Model	NA	NA	Model	75843	836317	0.0906869
OBJ38812_TMT10_p2.txt	1	OBJ38812_TMT10_p2.txt_1	127N	A1L3S5_MOUSE|A1L3S5	16.0581	KO_Early_3	KO_Early	NA	Model	NA	NA	Model	68229.8	681180	0.100164
OBJ38812_TMT10_p2.txt	1	OBJ38812_TMT10_p2.txt_1	130N	A1L3S5_MOUSE|A1L3S5	15.7976	KO_Early_4	KO_Early	NA	Model	NA	NA	Model	56959.5	681180	0.0836188
OBJ38812_TMT10_p2.txt	1	OBJ38812_TMT10_p2.txt_1	128N	A1L3S5_MOUSE|A1L3S5	15.9846	KO_Late_3	KO_Late	NA	Model	NA	NA	Model	64838	681180	0.0951848
OBJ38812_TMT10_p2.txt	1	OBJ38812_TMT10_p2.txt_1	131N	A1L3S5_MOUSE|A1L3S5	15.9697	KO_Late_4	KO_Late	NA	Model	NA	NA	Model	64176	681180	0.0942129
OBJ38812_TMT10_p2.txt	1	OBJ38812_TMT10_p2.txt_1	129N	A1L3S5_MOUSE|A1L3S5	15.576	KO_Uninfect_3	KO_Uninfect	NA	Model	NA	NA	Model	48847.7	681180	0.0717104
OBJ38812_TMT10_p2.txt	1	OBJ38812_TMT10_p2.txt_1	126C	A1L3S5_MOUSE|A1L3S5	15.6993	WT_Early_3	WT_Early	NA	Model	NA	NA	Model	53204.8	681180	0.0781067
OBJ38812_TMT10_p2.txt	1	OBJ38812_TMT10_p2.txt_1	129C	A1L3S5_MOUSE|A1L3S5	15.4933	WT_Early_4	WT_Early	NA	Model	NA	NA	Model	46124.9	681180	0.0677131
OBJ38812_TMT10_p2.txt	1	OBJ38812_TMT10_p2.txt_1	127C	A1L3S5_MOUSE|A1L3S5	15.4212	WT_Late_3	WT_Late	NA	Model	NA	NA	Model	43878.9	681180	0.064416
[truncated: 181,547 more rows]
