# Supplementary material for: Multiplexed proteomics of autophagy-deficient murine macrophages reveals enhanced antimicrobial immunity via the oxidative stress response
Source: eLife. 2021 Jun 4;10:e62320. doi: 10.7554/eLife.62320 (PMC8177894; doi:10.7554/eLife.62320)
Supplement: Supplementary file 8. [file elife-62320-supp8.xlsx]

## Sheet: v1_8_0_Shigella_combined_phos_T
Protein	Label	log2FC	SE	DF	pvalue	adj.pvalue	log10p	abslog2FC	log10adjp
1433B_MOUSE|Q9CQV8_S47	KO_Early-WT_Early	0.958019	0.241773	8.44283	0.00373773	0.0334561	2.42739	0.958019	1.47553
1433B_MOUSE|Q9CQV8_S47	KO_Late-WT_Late	1.005	0.241773	8.44283	0.00282643	0.0259978	2.54876	1.005	1.58506
1433B_MOUSE|Q9CQV8_S47	KO_Uninfected-WT_Uninfected	-0.255726	0.296111	8.44283	0.41166	0.661254	0.385461	0.255726	0.179632
1433B_MOUSE|Q9CQV8_S47	KO_Early-KO_Uninfected	0.215501	0.241773	8.44283	0.39744	0.533391	0.400728	0.215501	0.272954
1433B_MOUSE|Q9CQV8_S47	KO_Late-KO_Uninfected	0.293065	0.241773	8.44283	0.258285	0.404605	0.587901	0.293065	0.392968
1433B_MOUSE|Q9CQV8_S47	WT_Early-Wt_Uninfected	-0.998245	0.296111	8.44283	0.00903276	0.027177	2.04418	0.998245	1.5658
1433B_MOUSE|Q9CQV8_S47	WT_Late-Wt_Uninfected	-0.967658	0.296111	8.44283	0.010586	0.0339619	1.97527	0.967658	1.46901
1433B_MOUSE|Q9CQV8_S47	Infected-Uninfected	-0.364334	0.17096	8.44283	0.0638967	0.106309	1.19452	0.364334	0.97343
1433B_MOUSE|Q9CQV8_S47	KO-WT	0.569097	0.150772	8.44283	0.00492267	0.0198616	2.3078	0.569097	1.70199
1433B_MOUSE|Q9CQV8_S47	Early-Uninfected	-0.391372	0.191139	8.44283	0.0729467	0.121857	1.13699	0.391372	0.914151
1433B_MOUSE|Q9CQV8_S47	Late-Uninfected	-0.337297	0.191139	8.44283	0.113649	0.184305	0.944434	0.337297	0.734463
1433B_MOUSE|Q9CQV8_S66	KO_Early-WT_Early	0.150067	0.118369	8.44283	0.238716	0.43477	0.622118	0.150067	0.361741
1433B_MOUSE|Q9CQV8_S66	KO_Late-WT_Late	-0.0617097	0.118369	8.44283	0.61553	0.763563	0.210751	0.0617097	0.117155
1433B_MOUSE|Q9CQV8_S66	KO_Uninfected-WT_Uninfected	-0.168089	0.144971	8.44283	0.278005	0.54053	0.555947	0.168089	0.267181
1433B_MOUSE|Q9CQV8_S66	KO_Early-KO_Uninfected	0.0780552	0.118369	8.44283	0.527198	0.650886	0.278026	0.0780552	0.186495
1433B_MOUSE|Q9CQV8_S66	KO_Late-KO_Uninfected	-0.0743559	0.118369	8.44283	0.546505	0.683201	0.262406	0.0743559	0.165451
1433B_MOUSE|Q9CQV8_S66	WT_Early-Wt_Uninfected	-0.240101	0.144971	8.44283	0.134289	0.225725	0.871959	0.240101	0.64642
1433B_MOUSE|Q9CQV8_S66	WT_Late-Wt_Uninfected	-0.180736	0.144971	8.44283	0.245985	0.368028	0.609092	0.180736	0.434119
1433B_MOUSE|Q9CQV8_S66	Infected-Uninfected	-0.104284	0.0836993	8.44283	0.246249	0.326489	0.608626	0.104284	0.486132
1433B_MOUSE|Q9CQV8_S66	KO-WT	-0.0265773	0.0738158	8.44283	0.727652	0.810635	0.138076	0.0265773	0.0911745
1433B_MOUSE|Q9CQV8_S66	Early-Uninfected	-0.0810231	0.0935787	8.44283	0.410512	0.502229	0.386674	0.0810231	0.299099
1433B_MOUSE|Q9CQV8_S66	Late-Uninfected	-0.127546	0.0935787	8.44283	0.208128	0.298704	0.681669	0.127546	0.52476
1433Z_MOUSE|P63101_S110	KO_Early-WT_Early	0.357642	0.126705	8.44283	0.0212384	0.0964275	1.67288	0.357642	1.0158
1433Z_MOUSE|P63101_S110	KO_Late-WT_Late	0.391107	0.126705	8.44283	0.0140215	0.0715608	1.85321	0.391107	1.14533
1433Z_MOUSE|P63101_S110	KO_Uninfected-WT_Uninfected	0.479668	0.155182	8.44283	0.0139285	0.104796	1.8561	0.479668	0.979654
1433Z_MOUSE|P63101_S110	KO_Early-KO_Uninfected	-0.00963379	0.126705	8.44283	0.941164	0.962563	0.0263348	0.00963379	0.016571
1433Z_MOUSE|P63101_S110	KO_Late-KO_Uninfected	0.113687	0.126705	8.44283	0.39445	0.546849	0.404008	0.113687	0.262132
1433Z_MOUSE|P63101_S110	WT_Early-Wt_Uninfected	0.112392	0.155182	8.44283	0.488489	0.601691	0.311145	0.112392	0.220626
1433Z_MOUSE|P63101_S110	WT_Late-Wt_Uninfected	0.202247	0.155182	8.44283	0.226892	0.346495	0.644181	0.202247	0.460303
1433Z_MOUSE|P63101_S110	Infected-Uninfected	0.104673	0.0895942	8.44283	0.274615	0.357249	0.561275	0.104673	0.447029
1433Z_MOUSE|P63101_S110	KO-WT	0.409472	0.0790147	8.44283	0.000708354	0.00476006	3.14975	0.409472	2.32239
1433Z_MOUSE|P63101_S110	Early-Uninfected	0.0513789	0.100169	8.44283	0.621156	0.695843	0.2068	0.0513789	0.157488
1433Z_MOUSE|P63101_S110	Late-Uninfected	0.157967	0.100169	8.44283	0.151469	0.23152	0.819675	0.157967	0.635411
2A5A_MOUSE|Q6PD03_S41	KO_Early-WT_Early	-0.0389524	0.148718	8.44283	0.79966	0.89015	0.0970949	0.0389524	0.0505366
2A5A_MOUSE|Q6PD03_S41	KO_Late-WT_Late	-0.0448664	0.148718	8.44283	0.770188	0.865756	0.113403	0.0448664	0.0626047
2A5A_MOUSE|Q6PD03_S41	KO_Uninfected-WT_Uninfected	-0.0852365	0.182142	8.44283	0.651651	0.825882	0.185985	0.0852365	0.083082
2A5A_MOUSE|Q6PD03_S41	KO_Early-KO_Uninfected	-0.38909	0.148718	8.44283	0.0294739	0.0721941	1.53056	0.38909	1.1415
2A5A_MOUSE|Q6PD03_S41	KO_Late-KO_Uninfected	-0.100918	0.148718	8.44283	0.515566	0.657829	0.287716	0.100918	0.181887
2A5A_MOUSE|Q6PD03_S41	WT_Early-Wt_Uninfected	-0.435374	0.182142	8.44283	0.0422717	0.091702	1.37395	0.435374	1.03762
2A5A_MOUSE|Q6PD03_S41	WT_Late-Wt_Uninfected	-0.141288	0.182142	8.44283	0.459099	0.583008	0.338094	0.141288	0.234326
2A5A_MOUSE|Q6PD03_S41	Infected-Uninfected	-0.266668	0.10516	8.44283	0.0335077	0.061675	1.47486	0.266668	1.20989
2A5A_MOUSE|Q6PD03_S41	KO-WT	-0.0563518	0.092742	8.44283	0.559426	0.67249	0.252257	0.0563518	0.172314
2A5A_MOUSE|Q6PD03_S41	Early-Uninfected	-0.412232	0.117572	8.44283	0.00735482	0.0177795	2.13343	0.412232	1.75008
2A5A_MOUSE|Q6PD03_S41	Late-Uninfected	-0.121103	0.117572	8.44283	0.331596	0.432706	0.47939	0.121103	0.363807
2A5A_MOUSE|Q6PD03_S42	KO_Early-WT_Early	-0.177731	0.11851	8.44283	0.17012	0.3524	0.769245	0.177731	0.452964
2A5A_MOUSE|Q6PD03_S42	KO_Late-WT_Late	0.173428	0.11851	8.44283	0.179567	0.35959	0.745774	0.173428	0.444192
2A5A_MOUSE|Q6PD03_S42	KO_Uninfected-WT_Uninfected	0.237854	0.145144	8.44283	0.137916	0.369698	0.860385	0.237854	0.432153
2A5A_MOUSE|Q6PD03_S42	KO_Early-KO_Uninfected	-0.968878	0.11851	8.44283	2.72505e-05	0.000263049	4.56463	0.968878	3.57996
2A5A_MOUSE|Q6PD03_S42	KO_Late-KO_Uninfected	-0.39949	0.11851	8.44283	0.00903625	0.032869	2.04401	0.39949	1.48321
2A5A_MOUSE|Q6PD03_S42	WT_Early-Wt_Uninfected	-0.553293	0.145144	8.44283	0.00465785	0.0159942	2.33181	0.553293	1.79604
2A5A_MOUSE|Q6PD03_S42	WT_Late-Wt_Uninfected	-0.335063	0.145144	8.44283	0.0481704	0.107562	1.31722	0.335063	0.96834
2A5A_MOUSE|Q6PD03_S42	Infected-Uninfected	-0.564181	0.0837992	8.44283	0.000115144	0.000522784	3.93876	0.564181	3.28168
2A5A_MOUSE|Q6PD03_S42	KO-WT	0.0778503	0.0739039	8.44283	0.32137	0.448879	0.492994	0.0778503	0.347871
2A5A_MOUSE|Q6PD03_S42	Early-Uninfected	-0.761086	0.0936903	8.44283	2.86032e-05	0.000165621	4.54359	0.761086	3.78088
2A5A_MOUSE|Q6PD03_S42	Late-Uninfected	-0.367276	0.0936903	8.44283	0.00397538	0.0119714	2.40062	0.367276	1.92185
2A5A_MOUSE|Q6PD03_S49	KO_Early-WT_Early	0.325389	0.187011	19.4428	0.0976742	0.251513	1.01022	0.325389	0.59944
2A5A_MOUSE|Q6PD03_S49	KO_Late-WT_Late	0.145445	0.187011	19.4428	0.446087	0.629999	0.350581	0.145445	0.20066
2A5A_MOUSE|Q6PD03_S49	KO_Uninfected-WT_Uninfected	-0.00103165	0.215942	19.4428	0.996237	0.998208	0.00163741	0.00103165	0.000778915
2A5A_MOUSE|Q6PD03_S49	KO_Early-KO_Uninfected	1.80789	0.201995	19.4428	2.50728e-08	9.69224e-07	7.6008	1.80789	6.01358
2A5A_MOUSE|Q6PD03_S49	KO_Late-KO_Uninfected	1.02629	0.201995	19.4428	6.20378e-05	0.000722402	4.20734	1.02629	3.14122
2A5A_MOUSE|Q6PD03_S49	WT_Early-Wt_Uninfected	1.48147	0.201995	19.4428	5.16271e-07	1.10768e-05	6.28712	1.48147	4.95559
2A5A_MOUSE|Q6PD03_S49	WT_Late-Wt_Uninfected	0.879811	0.201995	19.4428	0.000324612	0.00250949	3.48864	0.879811	2.60041
2A5A_MOUSE|Q6PD03_S49	Infected-Uninfected	1.29887	0.126607	19.4428	2.74925e-09	6.62633e-08	8.56079	1.29887	7.17873
2A5A_MOUSE|Q6PD03_S49	KO-WT	0.156601	0.113811	19.4428	0.184475	0.296994	0.734063	0.156601	0.527253
2A5A_MOUSE|Q6PD03_S49	Early-Uninfected	1.64468	0.142832	19.4428	3.94272e-10	1.29997e-08	9.4042	1.64468	7.88607
2A5A_MOUSE|Q6PD03_S49	Late-Uninfected	0.953049	0.142832	19.4428	1.96977e-06	2.47064e-05	5.70558	0.953049	4.60719
2A5B_MOUSE|Q6PD28_S47	KO_Early-WT_Early	0.284032	0.150932	8.44283	0.0946958	0.247101	1.02367	0.284032	0.607125
2A5B_MOUSE|Q6PD28_S47	KO_Late-WT_Late	0.307215	0.150932	8.44283	0.0743601	0.204675	1.12866	0.307215	0.688936
2A5B_MOUSE|Q6PD28_S47	KO_Uninfected-WT_Uninfected	0.205424	0.184853	8.44283	0.297089	0.5599	0.527114	0.205424	0.251889
2A5B_MOUSE|Q6PD28_S47	KO_Early-KO_Uninfected	-0.427401	0.150932	8.44283	0.0209343	0.0549327	1.67914	0.427401	1.26017
2A5B_MOUSE|Q6PD28_S47	KO_Late-KO_Uninfected	-0.437157	0.150932	8.44283	0.0189026	0.0576223	1.72348	0.437157	1.23941
2A5B_MOUSE|Q6PD28_S47	WT_Early-Wt_Uninfected	-0.506008	0.184853	8.44283	0.0243119	0.0596093	1.61418	0.506008	1.22469
2A5B_MOUSE|Q6PD28_S47	WT_Late-Wt_Uninfected	-0.538947	0.184853	8.44283	0.0183402	0.0515218	1.7366	0.538947	1.28801
2A5B_MOUSE|Q6PD28_S47	Infected-Uninfected	-0.477378	0.106725	8.44283	0.00181472	0.0052684	2.74119	0.477378	2.27832
2A5B_MOUSE|Q6PD28_S47	KO-WT	0.265557	0.0941225	8.44283	0.0212799	0.0586179	1.67203	0.265557	1.23197
2A5B_MOUSE|Q6PD28_S47	Early-Uninfected	-0.466705	0.119322	8.44283	0.0040268	0.0106998	2.39504	0.466705	1.97062
2A5B_MOUSE|Q6PD28_S47	Late-Uninfected	-0.488052	0.119322	8.44283	0.00310852	0.00979488	2.50745	0.488052	2.009
2A5B_MOUSE|Q6PD28_T12	KO_Early-WT_Early	0.0476764	0.154318	8.44283	0.764848	0.869755	0.116425	0.0476764	0.0606031
2A5B_MOUSE|Q6PD28_T12	KO_Late-WT_Late	0.230533	0.154318	8.44283	0.171606	0.349281	0.765466	0.230533	0.456825
2A5B_MOUSE|Q6PD28_T12	KO_Uninfected-WT_Uninfected	-0.0711153	0.189	8.44283	0.715996	0.863657	0.145089	0.0711153	0.0636588
2A5B_MOUSE|Q6PD28_T12	KO_Early-KO_Uninfected	0.489844	0.154318	8.44283	0.0122363	0.0355959	1.91235	0.489844	1.4486
2A5B_MOUSE|Q6PD28_T12	KO_Late-KO_Uninfected	0.345	0.154318	8.44283	0.0541049	0.127136	1.26676	0.345	0.895732
2A5B_MOUSE|Q6PD28_T12	WT_Early-Wt_Uninfected	0.371052	0.189	8.44283	0.0833375	0.156064	1.07916	0.371052	0.806696
2A5B_MOUSE|Q6PD28_T12	WT_Late-Wt_Uninfected	0.0433514	0.189	8.44283	0.82404	0.88104	0.0840519	0.0433514	0.0550045
2A5B_MOUSE|Q6PD28_T12	Infected-Uninfected	0.312312	0.109119	8.44283	0.0199533	0.0398418	1.69999	0.312312	1.39966
2A5B_MOUSE|Q6PD28_T12	KO-WT	0.0690314	0.0962343	8.44283	0.49254	0.613517	0.307559	0.0690314	0.212173
2A5B_MOUSE|Q6PD28_T12	Early-Uninfected	0.430448	0.121999	8.44283	0.00711335	0.0172936	2.14793	0.430448	1.76211
2A5B_MOUSE|Q6PD28_T12	Late-Uninfected	0.194176	0.121999	8.44283	0.148157	0.227536	0.829279	0.194176	0.64295
2A5E_MOUSE|Q61151_S33	KO_Early-WT_Early	-0.319063	0.159493	8.44283	0.0785841	0.220165	1.10467	0.319063	0.657252
2A5E_MOUSE|Q61151_S33	KO_Late-WT_Late	-0.325123	0.159493	8.44283	0.074005	0.204026	1.13074	0.325123	0.690315
2A5E_MOUSE|Q61151_S33	KO_Uninfected-WT_Uninfected	-0.344012	0.195338	8.44283	0.114277	0.334863	0.94204	0.344012	0.475133
2A5E_MOUSE|Q61151_S33	KO_Early-KO_Uninfected	-0.460823	0.159493	8.44283	0.0191149	0.0510514	1.71863	0.460823	1.29199
2A5E_MOUSE|Q61151_S33	KO_Late-KO_Uninfected	-0.174655	0.159493	8.44283	0.303741	0.454407	0.517496	0.174655	0.342555
2A5E_MOUSE|Q61151_S33	WT_Early-Wt_Uninfected	-0.485772	0.195338	8.44283	0.036234	0.081485	1.44088	0.485772	1.08892
2A5E_MOUSE|Q61151_S33	WT_Late-Wt_Uninfected	-0.193544	0.195338	8.44283	0.349321	0.476553	0.456776	0.193544	0.321888
2A5E_MOUSE|Q61151_S33	Infected-Uninfected	-0.328698	0.112779	8.44283	0.018369	0.037179	1.73591	0.328698	1.4297
2A5E_MOUSE|Q61151_S33	KO-WT	-0.329399	0.0994613	8.44283	0.00989355	0.0334319	2.00465	0.329399	1.47584
2A5E_MOUSE|Q61151_S33	Early-Uninfected	-0.473298	0.12609	8.44283	0.00507735	0.0130139	2.29436	0.473298	1.88559
2A5E_MOUSE|Q61151_S33	Late-Uninfected	-0.184099	0.12609	8.44283	0.180459	0.266608	0.743621	0.184099	0.574127
2A5G_MOUSE|Q60996_S497	KO_Early-WT_Early	-0.0827682	0.151407	19.4428	0.590831	0.752667	0.228537	0.0827682	0.123397
2A5G_MOUSE|Q60996_S497	KO_Late-WT_Late	-0.159013	0.151407	19.4428	0.30649	0.500176	0.513584	0.159013	0.300877
2A5G_MOUSE|Q60996_S497	KO_Uninfected-WT_Uninfected	-0.0160995	0.17483	19.4428	0.927571	0.96926	0.0326526	0.0160995	0.0135597
2A5G_MOUSE|Q60996_S497	KO_Early-KO_Uninfected	0.0558658	0.163538	19.4428	0.736311	0.820533	0.132939	0.0558658	0.0859042
2A5G_MOUSE|Q60996_S497	KO_Late-KO_Uninfected	0.0521072	0.163538	19.4428	0.753409	0.841148	0.122969	0.0521072	0.0751275
2A5G_MOUSE|Q60996_S497	WT_Early-Wt_Uninfected	0.122535	0.163538	19.4428	0.462663	0.578386	0.334735	0.122535	0.237782
2A5G_MOUSE|Q60996_S497	WT_Late-Wt_Uninfected	0.195021	0.163538	19.4428	0.247413	0.369786	0.606577	0.195021	0.43205
2A5G_MOUSE|Q60996_S497	Infected-Uninfected	0.106382	0.102503	19.4428	0.312079	0.396643	0.505736	0.106382	0.4016
2A5G_MOUSE|Q60996_S497	KO-WT	-0.0859602	0.0921434	19.4428	0.362315	0.490077	0.440914	0.0859602	0.309735
2A5G_MOUSE|Q60996_S497	Early-Uninfected	0.0892002	0.115639	19.4428	0.449763	0.539565	0.347017	0.0892002	0.267956
2A5G_MOUSE|Q60996_S497	Late-Uninfected	0.123564	0.115639	19.4428	0.298368	0.398105	0.525247	0.123564	0.400002
3BP1_MOUSE|P55194_S182	KO_Early-WT_Early	0.283353	0.135952	19.4428	0.0505575	0.166383	1.29621	0.283353	0.778891
3BP1_MOUSE|P55194_S182	KO_Late-WT_Late	0.253962	0.135952	19.4428	0.0769042	0.208912	1.11405	0.253962	0.680037
3BP1_MOUSE|P55194_S182	KO_Uninfected-WT_Uninfected	0.209492	0.156984	19.4428	0.197465	0.450056	0.704509	0.209492	0.346733
3BP1_MOUSE|P55194_S182	KO_Early-KO_Uninfected	1.23087	0.146845	19.4428	6.98419e-08	2.24814e-06	7.15588	1.23087	5.64818
3BP1_MOUSE|P55194_S182	KO_Late-KO_Uninfected	1.0567	0.146845	19.4428	6.79475e-07	2.14605e-05	6.16783	1.0567	4.66836
3BP1_MOUSE|P55194_S182	WT_Early-Wt_Uninfected	1.15701	0.146845	19.4428	1.79141e-07	4.77393e-06	6.74681	1.15701	5.32112
3BP1_MOUSE|P55194_S182	WT_Late-Wt_Uninfected	1.01223	0.146845	19.4428	1.25202e-06	3.57861e-05	5.90239	1.01223	4.44629
3BP1_MOUSE|P55194_S182	Infected-Uninfected	1.1142	0.0920398	19.4428	1.6696e-10	6.27305e-09	9.77739	1.1142	8.20252
3BP1_MOUSE|P55194_S182	KO-WT	0.248936	0.0827376	19.4428	0.00709128	0.0260137	2.14928	0.248936	1.5848
3BP1_MOUSE|P55194_S182	Early-Uninfected	1.19394	0.103835	19.4428	4.03965e-10	1.32264e-08	9.39366	1.19394	7.87856
3BP1_MOUSE|P55194_S182	Late-Uninfected	1.03447	0.103835	19.4428	4.45683e-09	1.60059e-07	8.35097	1.03447	6.79572
3BP1_MOUSE|P55194_S456	KO_Early-WT_Early	0.165717	0.0974194	19.4428	0.104869	0.26359	0.979352	0.165717	0.579071
3BP1_MOUSE|P55194_S456	KO_Late-WT_Late	0.193259	0.0974194	19.4428	0.0615801	0.181713	1.21056	0.193259	0.740613
3BP1_MOUSE|P55194_S456	KO_Uninfected-WT_Uninfected	0.266941	0.11249	19.4428	0.0280895	0.154101	1.55146	0.266941	0.812194
3BP1_MOUSE|P55194_S456	KO_Early-KO_Uninfected	-0.120747	0.105225	19.4428	0.265092	0.395911	0.576603	0.120747	0.402403
3BP1_MOUSE|P55194_S456	KO_Late-KO_Uninfected	-0.151643	0.105225	19.4428	0.165459	0.292139	0.781309	0.151643	0.53441
3BP1_MOUSE|P55194_S456	WT_Early-Wt_Uninfected	-0.0195233	0.105225	19.4428	0.854729	0.89917	0.0681717	0.0195233	0.0461582
3BP1_MOUSE|P55194_S456	WT_Late-Wt_Uninfected	-0.0779612	0.105225	19.4428	0.467608	0.590631	0.330118	0.0779612	0.228684
3BP1_MOUSE|P55194_S456	Infected-Uninfected	-0.0924688	0.0659532	19.4428	0.176668	0.247981	0.752841	0.0924688	0.605582
3BP1_MOUSE|P55194_S456	KO-WT	0.208639	0.0592875	19.4428	0.00223106	0.011019	2.65149	0.208639	1.95786
3BP1_MOUSE|P55194_S456	Early-Uninfected	-0.0701354	0.0744053	19.4428	0.357445	0.449476	0.446791	0.0701354	0.347293
3BP1_MOUSE|P55194_S456	Late-Uninfected	-0.114802	0.0744053	19.4428	0.138967	0.216675	0.857087	0.114802	0.664192
3BP1_MOUSE|P55194_S498	KO_Early-WT_Early	0.0461537	0.118404	19.4428	0.700922	0.828994	0.15433	0.0461537	0.0814489
3BP1_MOUSE|P55194_S498	KO_Late-WT_Late	0.104807	0.118404	19.4428	0.386883	0.57905	0.41242	0.104807	0.237284
3BP1_MOUSE|P55194_S498	KO_Uninfected-WT_Uninfected	-0.18861	0.136721	19.4428	0.183395	0.432134	0.736612	0.18861	0.364382
3BP1_MOUSE|P55194_S498	KO_Early-KO_Uninfected	-0.326063	0.127891	19.4428	0.0193578	0.0515689	1.71314	0.326063	1.28761
3BP1_MOUSE|P55194_S498	KO_Late-KO_Uninfected	-0.0453257	0.127891	19.4428	0.726847	0.823444	0.138557	0.0453257	0.0843661
3BP1_MOUSE|P55194_S498	WT_Early-Wt_Uninfected	-0.560826	0.127891	19.4428	0.000303241	0.0018094	3.51821	0.560826	2.74247
3BP1_MOUSE|P55194_S498	WT_Late-Wt_Uninfected	-0.338742	0.127891	19.4428	0.0156467	0.045591	1.80558	0.338742	1.34112
3BP1_MOUSE|P55194_S498	Infected-Uninfected	-0.317739	0.0801598	19.4428	0.000801436	0.00264429	3.09613	0.317739	2.57769
3BP1_MOUSE|P55194_S498	KO-WT	-0.0125496	0.0720583	19.4428	0.863541	0.908699	0.063717	0.0125496	0.0415801
3BP1_MOUSE|P55194_S498	Early-Uninfected	-0.443444	0.0904324	19.4428	9.26331e-05	0.000444072	4.03323	0.443444	3.35255
3BP1_MOUSE|P55194_S498	Late-Uninfected	-0.192034	0.0904324	19.4428	0.0467531	0.089502	1.33019	0.192034	1.04817
3BP1_MOUSE|P55194_S503	KO_Early-WT_Early	-0.100582	0.16084	8.44283	0.548264	0.719565	0.26101	0.100582	0.14293
3BP1_MOUSE|P55194_S503	KO_Late-WT_Late	0.121175	0.16084	8.44283	0.471701	0.653723	0.326333	0.121175	0.184606
3BP1_MOUSE|P55194_S503	KO_Uninfected-WT_Uninfected	-0.138803	0.196988	8.44283	0.500013	0.729568	0.301018	0.138803	0.136934
3BP1_MOUSE|P55194_S503	KO_Early-KO_Uninfected	-0.365105	0.16084	8.44283	0.0512209	0.111051	1.29055	0.365105	0.954476
3BP1_MOUSE|P55194_S503	KO_Late-KO_Uninfected	-0.0180297	0.16084	8.44283	0.913366	0.946565	0.0393553	0.0180297	0.0238494
3BP1_MOUSE|P55194_S503	WT_Early-Wt_Uninfected	-0.403327	0.196988	8.44283	0.0729595	0.140986	1.13692	0.403327	0.850823
3BP1_MOUSE|P55194_S503	WT_Late-Wt_Uninfected	-0.278008	0.196988	8.44283	0.193928	0.308314	0.712359	0.278008	0.511007
3BP1_MOUSE|P55194_S503	Infected-Uninfected	-0.266117	0.113731	8.44283	0.0458152	0.080284	1.33899	0.266117	1.09537
3BP1_MOUSE|P55194_S503	KO-WT	-0.0394035	0.100301	8.44283	0.704162	0.792662	0.152327	0.0394035	0.100912
3BP1_MOUSE|P55194_S503	Early-Uninfected	-0.384216	0.127155	8.44283	0.0155242	0.0334228	1.80899	0.384216	1.47596
3BP1_MOUSE|P55194_S503	Late-Uninfected	-0.148019	0.127155	8.44283	0.276229	0.374631	0.55873	0.148019	0.426396
3BP1_MOUSE|P55194_S510	KO_Early-WT_Early	0.227916	0.0923411	19.4429	0.0230064	0.101706	1.63815	0.227916	0.992654
3BP1_MOUSE|P55194_S510	KO_Late-WT_Late	0.373266	0.0923411	19.4429	0.000668716	0.010249	3.17476	0.373266	1.98932
3BP1_MOUSE|P55194_S510	KO_Uninfected-WT_Uninfected	0.549811	0.106626	19.4429	5.23186e-05	0.00432553	4.28134	0.549811	2.36396
3BP1_MOUSE|P55194_S510	KO_Early-KO_Uninfected	0.260086	0.0997398	19.4429	0.0170929	0.0466296	1.76718	0.260086	1.33134
3BP1_MOUSE|P55194_S510	KO_Late-KO_Uninfected	-0.0935963	0.0997398	19.4429	0.359548	0.512183	0.444243	0.0935963	0.290575
3BP1_MOUSE|P55194_S510	WT_Early-Wt_Uninfected	0.581981	0.0997398	19.4429	1.16532e-05	0.000135256	4.93356	0.581981	3.86884
3BP1_MOUSE|P55194_S510	WT_Late-Wt_Uninfected	0.0829488	0.0997398	19.4429	0.415703	0.541372	0.381217	0.0829488	0.266504
3BP1_MOUSE|P55194_S510	Infected-Uninfected	0.207855	0.0625152	19.4429	0.00347646	0.00913539	2.45886	0.207855	2.03927
3BP1_MOUSE|P55194_S510	KO-WT	0.383664	0.056197	19.4429	1.43299e-06	4.88243e-05	5.84376	0.383664	4.31136
3BP1_MOUSE|P55194_S510	Early-Uninfected	0.421033	0.0705267	19.4429	8.70036e-06	6.10818e-05	5.06046	0.421033	4.21409
3BP1_MOUSE|P55194_S510	Late-Uninfected	-0.00532377	0.0705267	19.4429	0.940599	0.957732	0.0265953	0.00532377	0.0187559
3BP1_MOUSE|P55194_S553	KO_Early-WT_Early	0.910088	0.161219	19.4428	1.76523e-05	0.000993417	4.7532	0.910088	3.00287
3BP1_MOUSE|P55194_S553	KO_Late-WT_Late	1.07252	0.161219	19.4428	2.05293e-06	0.000232818	5.68763	1.07252	3.63298
3BP1_MOUSE|P55194_S553	KO_Uninfected-WT_Uninfected	0.553453	0.18616	19.4428	0.0076793	0.0754849	2.11468	0.553453	1.12214
3BP1_MOUSE|P55194_S553	KO_Early-KO_Uninfected	0.0333927	0.174137	19.4428	0.849918	0.90233	0.0706232	0.0333927	0.0446344
3BP1_MOUSE|P55194_S553	KO_Late-KO_Uninfected	-0.150456	0.174137	19.4428	0.398114	0.550476	0.399992	0.150456	0.259262
3BP1_MOUSE|P55194_S553	WT_Early-Wt_Uninfected	-0.323242	0.174137	19.4428	0.0786375	0.149202	1.10437	0.323242	0.826225
3BP1_MOUSE|P55194_S553	WT_Late-Wt_Uninfected	-0.66952	0.174137	19.4428	0.00105475	0.00600233	2.97685	0.66952	2.22168
3BP1_MOUSE|P55194_S553	Infected-Uninfected	-0.277456	0.109146	19.4428	0.0196687	0.0393545	1.70623	0.277456	1.40501
3BP1_MOUSE|P55194_S553	KO-WT	0.845353	0.0981148	19.4428	4.55837e-08	3.21034e-06	7.34119	0.845353	5.49345
3BP1_MOUSE|P55194_S553	Early-Uninfected	-0.144925	0.123133	19.4428	0.253413	0.339361	0.59617	0.144925	0.469338
3BP1_MOUSE|P55194_S553	Late-Uninfected	-0.409988	0.123133	19.4428	0.00343898	0.0106368	2.46357	0.409988	1.97319
3BP1_MOUSE|P55194_S598	KO_Early-WT_Early	0.491863	0.199432	19.4428	0.0230974	0.101967	1.63644	0.491863	0.991542
3BP1_MOUSE|P55194_S598	KO_Late-WT_Late	0.419522	0.199432	19.4428	0.0486486	0.157267	1.31293	0.419522	0.803362
3BP1_MOUSE|P55194_S598	KO_Uninfected-WT_Uninfected	0.233934	0.230284	19.4428	0.322175	0.583863	0.491908	0.233934	0.233689
3BP1_MOUSE|P55194_S598	KO_Early-KO_Uninfected	-0.0873058	0.215411	19.4428	0.689683	0.786195	0.161351	0.0873058	0.10447
3BP1_MOUSE|P55194_S598	KO_Late-KO_Uninfected	0.0945492	0.215411	19.4428	0.665555	0.77754	0.176816	0.0945492	0.109277
3BP1_MOUSE|P55194_S598	WT_Early-Wt_Uninfected	-0.345235	0.215411	19.4428	0.125128	0.213891	0.902647	0.345235	0.669808
3BP1_MOUSE|P55194_S598	WT_Late-Wt_Uninfected	-0.091038	0.215411	19.4428	0.677206	0.767988	0.169279	0.091038	0.114646
3BP1_MOUSE|P55194_S598	Infected-Uninfected	-0.107257	0.135016	19.4428	0.436549	0.521431	0.359967	0.107257	0.282803
3BP1_MOUSE|P55194_S598	KO-WT	0.381773	0.12137	19.4428	0.0052178	0.020685	2.28251	0.381773	1.68434
3BP1_MOUSE|P55194_S598	Early-Uninfected	-0.21627	0.152319	19.4428	0.171486	0.2474	0.765771	0.21627	0.606601
3BP1_MOUSE|P55194_S598	Late-Uninfected	0.0017556	0.152319	19.4428	0.990921	0.993754	0.00396081	0.0017556	0.00272092
3BP1_MOUSE|P55194_T455	KO_Early-WT_Early	0.56687	0.187773	19.4428	0.00693192	0.0488178	2.15915	0.56687	1.31142
3BP1_MOUSE|P55194_T455	KO_Late-WT_Late	0.587952	0.187773	19.4428	0.00538899	0.0388859	2.26849	0.587952	1.41021
3BP1_MOUSE|P55194_T455	KO_Uninfected-WT_Uninfected	0.787039	0.216822	19.4428	0.00173017	0.0334398	2.76191	0.787039	1.47574
3BP1_MOUSE|P55194_T455	KO_Early-KO_Uninfected	-0.0565829	0.202818	19.4428	0.783203	0.856096	0.106126	0.0565829	0.0674778
3BP1_MOUSE|P55194_T455	KO_Late-KO_Uninfected	-0.161851	0.202818	19.4428	0.434502	0.584095	0.362008	0.161851	0.233516
3BP1_MOUSE|P55194_T455	WT_Early-Wt_Uninfected	0.163586	0.202818	19.4428	0.429674	0.547482	0.366861	0.163586	0.26163
3BP1_MOUSE|P55194_T455	WT_Late-Wt_Uninfected	0.0372356	0.202818	19.4428	0.856235	0.904254	0.0674069	0.0372356	0.0437097
3BP1_MOUSE|P55194_T455	Infected-Uninfected	-0.00440324	0.127123	19.4428	0.972722	0.979325	0.0120114	0.00440324	0.00907295
3BP1_MOUSE|P55194_T455	KO-WT	0.647287	0.114275	19.4428	1.69214e-05	0.000311642	4.77156	0.647287	3.50634
3BP1_MOUSE|P55194_T455	Early-Uninfected	0.0535014	0.143414	19.4428	0.713143	0.774358	0.146823	0.0535014	0.111058
3BP1_MOUSE|P55194_T455	Late-Uninfected	-0.0623079	0.143414	19.4428	0.668737	0.745898	0.174745	0.0623079	0.127321
3BP1_MOUSE|P55194_T513	KO_Early-WT_Early	0.257704	0.0955013	19.4428	0.0140491	0.0754448	1.85235	0.257704	1.12237
3BP1_MOUSE|P55194_T513	KO_Late-WT_Late	0.349531	0.0955013	19.4428	0.00161463	0.0180014	2.79193	0.349531	1.74469
3BP1_MOUSE|P55194_T513	KO_Uninfected-WT_Uninfected	0.326921	0.110275	19.4428	0.0078245	0.0762277	2.10654	0.326921	1.11789
3BP1_MOUSE|P55194_T513	KO_Early-KO_Uninfected	0.0298714	0.103153	19.4428	0.775201	0.850177	0.110586	0.0298714	0.0704906
3BP1_MOUSE|P55194_T513	KO_Late-KO_Uninfected	-0.214336	0.103153	19.4428	0.0512003	0.122318	1.29073	0.214336	0.912511
3BP1_MOUSE|P55194_T513	WT_Early-Wt_Uninfected	0.0990884	0.103153	19.4428	0.348551	0.468489	0.457733	0.0990884	0.329301
3BP1_MOUSE|P55194_T513	WT_Late-Wt_Uninfected	-0.236946	0.103153	19.4428	0.0328771	0.0804222	1.48311	0.236946	1.09462
3BP1_MOUSE|P55194_T513	Infected-Uninfected	-0.0805806	0.0646547	19.4428	0.227454	0.30586	0.643106	0.0805806	0.514477
3BP1_MOUSE|P55194_T513	KO-WT	0.311385	0.0581202	19.4428	3.33484e-05	0.000519021	4.47692	0.311385	3.28482
3BP1_MOUSE|P55194_T513	Early-Uninfected	0.0644799	0.0729403	19.4428	0.387493	0.479441	0.411736	0.0644799	0.319265
3BP1_MOUSE|P55194_T513	Late-Uninfected	-0.225641	0.0729403	19.4428	0.00586546	0.0164031	2.2317	0.225641	1.78507
3BP2_MOUSE|Q06649_S225	KO_Early-WT_Early	0.0756535	0.109799	19.4428	0.498952	0.68075	0.301941	0.0756535	0.167012
3BP2_MOUSE|Q06649_S225	KO_Late-WT_Late	0.0603118	0.109799	19.4428	0.589058	0.744624	0.229842	0.0603118	0.128063
3BP2_MOUSE|Q06649_S225	KO_Uninfected-WT_Uninfected	0.489903	0.126785	19.4428	0.00100894	0.0249054	2.99613	0.489903	1.60371
3BP2_MOUSE|Q06649_S225	KO_Early-KO_Uninfected	-0.583376	0.118596	19.4428	8.94497e-05	0.000685464	4.04842	0.583376	3.16402
3BP2_MOUSE|Q06649_S225	KO_Late-KO_Uninfected	-0.631994	0.118596	19.4428	3.55484e-05	0.000464952	4.44918	0.631994	3.33259
3BP2_MOUSE|Q06649_S225	WT_Early-Wt_Uninfected	-0.169127	0.118596	19.4428	0.169707	0.270926	0.7703	0.169127	0.56715
3BP2_MOUSE|Q06649_S225	WT_Late-Wt_Uninfected	-0.202403	0.118596	19.4428	0.103808	0.192469	0.983769	0.202403	0.715639
3BP2_MOUSE|Q06649_S225	Infected-Uninfected	-0.396725	0.0743342	19.4428	3.49121e-05	0.0001927	4.45702	0.396725	3.71512
3BP2_MOUSE|Q06649_S225	KO-WT	0.208623	0.0668215	19.4428	0.00550044	0.0214945	2.2596	0.208623	1.66767
3BP2_MOUSE|Q06649_S225	Early-Uninfected	-0.376252	0.0838603	19.4428	0.000240149	0.000993666	3.61952	0.376252	3.00276
3BP2_MOUSE|Q06649_S225	Late-Uninfected	-0.417199	0.0838603	19.4428	7.88004e-05	0.000495673	4.10347	0.417199	3.3048
3BP2_MOUSE|Q06649_S232	KO_Early-WT_Early	0.348868	0.0956769	19.4428	0.00166608	0.0198626	2.7783	0.348868	1.70196
3BP2_MOUSE|Q06649_S232	KO_Late-WT_Late	0.18384	0.0956769	19.4428	0.0694557	0.196468	1.15829	0.18384	0.706709
3BP2_MOUSE|Q06649_S232	KO_Uninfected-WT_Uninfected	0.259347	0.110478	19.4428	0.0296201	0.158496	1.52841	0.259347	0.799982
3BP2_MOUSE|Q06649_S232	KO_Early-KO_Uninfected	-0.228282	0.103343	19.4428	0.0393607	0.090474	1.40494	0.228282	1.04348
3BP2_MOUSE|Q06649_S232	KO_Late-KO_Uninfected	-0.428608	0.103343	19.4428	0.000524568	0.00373375	3.2802	0.428608	2.42785
3BP2_MOUSE|Q06649_S232	WT_Early-Wt_Uninfected	-0.317803	0.103343	19.4428	0.00611102	0.019876	2.21389	0.317803	1.70167
3BP2_MOUSE|Q06649_S232	WT_Late-Wt_Uninfected	-0.3531	0.103343	19.4428	0.00281947	0.0125382	2.54983	0.3531	1.90177
3BP2_MOUSE|Q06649_S232	Infected-Uninfected	-0.331948	0.0647736	19.4428	5.61842e-05	0.000284544	4.25039	0.331948	3.54585
3BP2_MOUSE|Q06649_S232	KO-WT	0.264018	0.0582271	19.4428	0.000215269	0.0020198	3.66702	0.264018	2.69469
3BP2_MOUSE|Q06649_S232	Early-Uninfected	-0.273042	0.0730745	19.4428	0.00135384	0.00428036	2.86843	0.273042	2.36852
3BP2_MOUSE|Q06649_S232	Late-Uninfected	-0.390854	0.0730745	19.4428	3.40162e-05	0.000250316	4.46831	0.390854	3.60151
3BP2_MOUSE|Q06649_S277	KO_Early-WT_Early	0.193738	0.123919	19.4428	0.134084	0.306319	0.872622	0.193738	0.513826
3BP2_MOUSE|Q06649_S277	KO_Late-WT_Late	0.107503	0.123919	19.4428	0.396236	0.586366	0.402046	0.107503	0.231831
3BP2_MOUSE|Q06649_S277	KO_Uninfected-WT_Uninfected	0.28342	0.14309	19.4428	0.0619492	0.238914	1.20796	0.28342	0.621758
3BP2_MOUSE|Q06649_S277	KO_Early-KO_Uninfected	-0.303911	0.133848	19.4428	0.0347142	0.082015	1.45949	0.303911	1.08611
3BP2_MOUSE|Q06649_S277	KO_Late-KO_Uninfected	-0.27784	0.133848	19.4428	0.0514096	0.122702	1.28896	0.27784	0.91115
3BP2_MOUSE|Q06649_S277	WT_Early-Wt_Uninfected	-0.21423	0.133848	19.4428	0.125602	0.214528	0.901003	0.21423	0.668516
3BP2_MOUSE|Q06649_S277	WT_Late-Wt_Uninfected	-0.101923	0.133848	19.4428	0.455507	0.57985	0.341505	0.101923	0.236685
3BP2_MOUSE|Q06649_S277	Infected-Uninfected	-0.224476	0.0838939	19.4428	0.0147585	0.0308572	1.83096	0.224476	1.51064
3BP2_MOUSE|Q06649_S277	KO-WT	0.194887	0.075415	19.4428	0.0179751	0.0517801	1.74533	0.194887	1.28584
3BP2_MOUSE|Q06649_S277	Early-Uninfected	-0.259071	0.0946451	19.4428	0.0129105	0.0286523	1.88906	0.259071	1.54284
3BP2_MOUSE|Q06649_S277	Late-Uninfected	-0.189881	0.0946451	19.4428	0.0589433	0.108271	1.22957	0.189881	0.965488
3BP2_MOUSE|Q06649_S414	KO_Early-WT_Early	0.463094	0.113303	19.4428	0.00060277	0.0106654	3.21985	0.463094	1.97202
3BP2_MOUSE|Q06649_S414	KO_Late-WT_Late	0.460888	0.113303	19.4428	0.000630484	0.00989115	3.20033	0.460888	2.00475
3BP2_MOUSE|Q06649_S414	KO_Uninfected-WT_Uninfected	0.277314	0.130831	19.4428	0.0471162	0.203508	1.32683	0.277314	0.691419
3BP2_MOUSE|Q06649_S414	KO_Early-KO_Uninfected	0.424344	0.122381	19.4428	0.00251146	0.0100535	2.60007	0.424344	1.99768
3BP2_MOUSE|Q06649_S414	KO_Late-KO_Uninfected	0.259904	0.122381	19.4428	0.046733	0.114402	1.33038	0.259904	0.941565
3BP2_MOUSE|Q06649_S414	WT_Early-Wt_Uninfected	0.238563	0.122381	19.4428	0.0658275	0.129961	1.18159	0.238563	0.886186
3BP2_MOUSE|Q06649_S414	WT_Late-Wt_Uninfected	0.0763297	0.122381	19.4428	0.54007	0.653131	0.26755	0.0763297	0.185
3BP2_MOUSE|Q06649_S414	Infected-Uninfected	0.249785	0.0767064	19.4428	0.00406141	0.0104089	2.39132	0.249785	1.9826
3BP2_MOUSE|Q06649_S414	KO-WT	0.400432	0.0689539	19.4428	1.23789e-05	0.000247488	4.90732	0.400432	3.60645
3BP2_MOUSE|Q06649_S414	Early-Uninfected	0.331454	0.0865364	19.4428	0.00109082	0.00355842	2.96225	0.331454	2.44874
3BP2_MOUSE|Q06649_S414	Late-Uninfected	0.168117	0.0865364	19.4428	0.0666737	0.119612	1.17605	0.168117	0.922224
3BP2_MOUSE|Q06649_S442	KO_Early-WT_Early	-0.0296604	0.114156	19.4428	0.797731	0.889061	0.0981434	0.0296604	0.0510682
3BP2_MOUSE|Q06649_S442	KO_Late-WT_Late	-0.0870209	0.114156	19.4428	0.455031	0.638411	0.341959	0.0870209	0.1949
3BP2_MOUSE|Q06649_S442	KO_Uninfected-WT_Uninfected	0.0559815	0.131816	19.4428	0.675722	0.840422	0.170232	0.0559815	0.0755024
3BP2_MOUSE|Q06649_S442	KO_Early-KO_Uninfected	-0.0467202	0.123303	19.4428	0.708863	0.800349	0.149438	0.0467202	0.0967207
3BP2_MOUSE|Q06649_S442	KO_Late-KO_Uninfected	-0.210003	0.123303	19.4428	0.104473	0.208515	0.980998	0.210003	0.680863
3BP2_MOUSE|Q06649_S442	WT_Early-Wt_Uninfected	0.0389217	0.123303	19.4428	0.755624	0.82485	0.121695	0.0389217	0.0836252
3BP2_MOUSE|Q06649_S442	WT_Late-Wt_Uninfected	-0.0670007	0.123303	19.4428	0.593042	0.698723	0.226915	0.0670007	0.155695
3BP2_MOUSE|Q06649_S442	Infected-Uninfected	-0.0712006	0.077284	19.4428	0.368193	0.454601	0.433925	0.0712006	0.342369
3BP2_MOUSE|Q06649_S442	KO-WT	-0.0202333	0.0694731	19.4428	0.773953	0.845104	0.111286	0.0202333	0.0730898
3BP2_MOUSE|Q06649_S442	Early-Uninfected	-0.00389923	0.0871881	19.4428	0.964785	0.974291	0.0155695	0.00389923	0.0113112
3BP2_MOUSE|Q06649_S442	Late-Uninfected	-0.138502	0.0871881	19.4428	0.128294	0.203406	0.891795	0.138502	0.691636
3BP5_MOUSE|Q9Z131_S10	KO_Early-WT_Early	0.193629	0.159446	19.4428	0.239143	0.435235	0.621343	0.193629	0.361277
3BP5_MOUSE|Q9Z131_S10	KO_Late-WT_Late	0.0279844	0.159446	19.4428	0.862493	0.92212	0.0642443	0.0279844	0.0352125
3BP5_MOUSE|Q9Z131_S10	KO_Uninfected-WT_Uninfected	-0.497967	0.184112	19.4428	0.0138594	0.104611	1.85826	0.497967	0.980421
3BP5_MOUSE|Q9Z131_S10	KO_Early-KO_Uninfected	1.46021	0.172221	19.4428	5.85087e-08	1.93778e-06	7.23278	1.46021	5.71269
3BP5_MOUSE|Q9Z131_S10	KO_Late-KO_Uninfected	0.816833	0.172221	19.4428	0.000133535	0.00129497	3.8744	0.816833	2.88774
3BP5_MOUSE|Q9Z131_S10	WT_Early-Wt_Uninfected	0.76861	0.172221	19.4428	0.000253599	0.00156928	3.59585	0.76861	2.8043
3BP5_MOUSE|Q9Z131_S10	WT_Late-Wt_Uninfected	0.290882	0.172221	19.4428	0.107192	0.197393	0.969837	0.290882	0.704667
3BP5_MOUSE|Q9Z131_S10	Infected-Uninfected	0.834133	0.107945	19.4428	2.39589e-07	2.96528e-06	6.62053	0.834133	5.52793
3BP5_MOUSE|Q9Z131_S10	KO-WT	-0.0921176	0.0970355	19.4428	0.354111	0.482084	0.450861	0.0921176	0.316877
3BP5_MOUSE|Q9Z131_S10	Early-Uninfected	1.11441	0.121779	19.4428	1.76225e-08	3.30812e-07	7.75393	1.11441	6.48042
3BP5_MOUSE|Q9Z131_S10	Late-Uninfected	0.553858	0.121779	19.4428	0.000208569	0.00109878	3.68075	0.553858	2.95909
3BP5_MOUSE|Q9Z131_S379	KO_Early-WT_Early	0.78988	0.149926	8.44283	0.000634923	0.0109396	3.19728	0.78988	1.961
3BP5_MOUSE|Q9Z131_S379	KO_Late-WT_Late	0.422786	0.149926	8.44283	0.0213283	0.0931837	1.67104	0.422786	1.03066
3BP5_MOUSE|Q9Z131_S379	KO_Uninfected-WT_Uninfected	0.203902	0.183621	8.44283	0.297427	0.560231	0.526619	0.203902	0.251633
3BP5_MOUSE|Q9Z131_S379	KO_Early-KO_Uninfected	0.313909	0.149926	8.44283	0.0678006	0.138886	1.16877	0.313909	0.857343
3BP5_MOUSE|Q9Z131_S379	KO_Late-KO_Uninfected	0.236697	0.149926	8.44283	0.151068	0.273064	0.820827	0.236697	0.563735
3BP5_MOUSE|Q9Z131_S379	WT_Early-Wt_Uninfected	-0.272069	0.183621	8.44283	0.174754	0.277101	0.757573	0.272069	0.557362
3BP5_MOUSE|Q9Z131_S379	WT_Late-Wt_Uninfected	0.0178131	0.183621	8.44283	0.924982	0.95071	0.0338666	0.0178131	0.0219519
3BP5_MOUSE|Q9Z131_S379	Infected-Uninfected	0.0740874	0.106014	8.44283	0.503442	0.584655	0.298051	0.0740874	0.2331
3BP5_MOUSE|Q9Z131_S379	KO-WT	0.47219	0.0934954	8.44283	0.000839072	0.00539406	3.0762	0.47219	2.26808
3BP5_MOUSE|Q9Z131_S379	Early-Uninfected	0.02092	0.118527	8.44283	0.864062	0.897379	0.063455	0.02092	0.0470242
3BP5_MOUSE|Q9Z131_S379	Late-Uninfected	0.127255	0.118527	8.44283	0.312711	0.412784	0.504856	0.127255	0.384277
3BP5_MOUSE|Q9Z131_S421	KO_Early-WT_Early	0.182026	0.0742847	19.4429	0.023887	0.104171	1.62184	0.182026	0.982254
3BP5_MOUSE|Q9Z131_S421	KO_Late-WT_Late	0.0444137	0.0742847	19.4429	0.556818	0.720551	0.254287	0.0444137	0.142335
3BP5_MOUSE|Q9Z131_S421	KO_Uninfected-WT_Uninfected	0.277779	0.0857766	19.4429	0.00423023	0.0547584	2.37364	0.277779	1.26155
3BP5_MOUSE|Q9Z131_S421	KO_Early-KO_Uninfected	-0.765343	0.0802367	19.4429	9.05249e-09	4.1941e-07	8.04323	0.765343	6.37736
3BP5_MOUSE|Q9Z131_S421	KO_Late-KO_Uninfected	-0.713716	0.0802367	19.4429	2.76396e-08	1.67459e-06	7.55847	0.713716	5.77609
3BP5_MOUSE|Q9Z131_S421	WT_Early-Wt_Uninfected	-0.669589	0.0802367	19.4429	7.47573e-08	2.36466e-06	7.12635	0.669589	5.62623
3BP5_MOUSE|Q9Z131_S421	WT_Late-Wt_Uninfected	-0.48035	0.0802367	19.4429	8.3902e-06	0.000159351	5.07623	0.48035	3.79765
3BP5_MOUSE|Q9Z131_S421	Infected-Uninfected	-0.657249	0.050291	19.4429	4.40176e-11	2.05886e-09	10.3564	0.657249	8.68637
3BP5_MOUSE|Q9Z131_S421	KO-WT	0.168073	0.0452082	19.4429	0.00141355	0.00789886	2.84969	0.168073	2.10244
3BP5_MOUSE|Q9Z131_S421	Early-Uninfected	-0.717466	0.0567359	19.4429	7.82858e-11	3.28396e-09	10.1063	0.717466	8.4836
3BP5_MOUSE|Q9Z131_S421	Late-Uninfected	-0.597033	0.0567359	19.4429	1.80262e-09	7.42581e-08	8.74409	0.597033	7.12926
3BP5_MOUSE|Q9Z131_S422	KO_Early-WT_Early	0.299081	0.18479	8.44283	0.142234	0.317598	0.846997	0.299081	0.498122
3BP5_MOUSE|Q9Z131_S422	KO_Late-WT_Late	0.204155	0.18479	8.44283	0.299735	0.493949	0.523262	0.204155	0.306318
3BP5_MOUSE|Q9Z131_S422	KO_Uninfected-WT_Uninfected	-0.0372851	0.22632	8.44283	0.873021	0.943474	0.0589752	0.0372851	0.0252701
3BP5_MOUSE|Q9Z131_S422	KO_Early-KO_Uninfected	-0.341603	0.18479	8.44283	0.0997473	0.187153	1.0011	0.341603	0.727802
3BP5_MOUSE|Q9Z131_S422	KO_Late-KO_Uninfected	-0.227439	0.18479	8.44283	0.251583	0.397348	0.599319	0.227439	0.400828
3BP5_MOUSE|Q9Z131_S422	WT_Early-Wt_Uninfected	-0.677969	0.22632	8.44283	0.0161706	0.0433497	1.79127	0.677969	1.36301
3BP5_MOUSE|Q9Z131_S422	WT_Late-Wt_Uninfected	-0.46888	0.22632	8.44283	0.0702074	0.143384	1.15362	0.46888	0.843499
3BP5_MOUSE|Q9Z131_S422	Infected-Uninfected	-0.428973	0.130666	8.44283	0.0103428	0.0228311	1.98536	0.428973	1.64147
3BP5_MOUSE|Q9Z131_S422	KO-WT	0.155317	0.115237	8.44283	0.212767	0.33059	0.672096	0.155317	0.48071
3BP5_MOUSE|Q9Z131_S422	Early-Uninfected	-0.509786	0.146089	8.44283	0.00754273	0.0181676	2.12247	0.509786	1.7407
3BP5_MOUSE|Q9Z131_S422	Late-Uninfected	-0.34816	0.146089	8.44283	0.042754	0.0830281	1.36902	0.34816	1.08077
3BP5L_MOUSE|Q99LH9_S342	KO_Early-WT_Early	-0.757837	0.113241	19.4428	1.89096e-06	0.000207282	5.72332	0.757837	3.68344
3BP5L_MOUSE|Q99LH9_S342	KO_Late-WT_Late	-0.784434	0.113241	19.4428	1.16843e-06	0.00015338	5.9324	0.784434	3.81423
3BP5L_MOUSE|Q99LH9_S342	KO_Uninfected-WT_Uninfected	-0.338101	0.130759	19.4428	0.0179179	0.119593	1.74671	0.338101	0.922293
3BP5L_MOUSE|Q99LH9_S342	KO_Early-KO_Uninfected	0.0310276	0.122314	19.4428	0.802412	0.86899	0.0956025	0.0310276	0.0609854
3BP5L_MOUSE|Q99LH9_S342	KO_Late-KO_Uninfected	0.0143528	0.122314	19.4428	0.907791	0.942882	0.0420139	0.0143528	0.0255427
3BP5L_MOUSE|Q99LH9_S342	WT_Early-Wt_Uninfected	0.450764	0.122314	19.4428	0.00152316	0.00654825	2.81725	0.450764	2.18387
3BP5L_MOUSE|Q99LH9_S342	WT_Late-Wt_Uninfected	0.460685	0.122314	19.4428	0.00126364	0.00685969	2.89838	0.460685	2.1637
3BP5L_MOUSE|Q99LH9_S342	Infected-Uninfected	0.239207	0.0766642	19.4428	0.00552393	0.0134373	2.25775	0.239207	1.87169
3BP5L_MOUSE|Q99LH9_S342	KO-WT	-0.626791	0.068916	19.4428	1.94362e-08	1.66117e-06	7.71139	0.626791	5.77959
3BP5L_MOUSE|Q99LH9_S342	Early-Uninfected	0.240896	0.0864889	19.4428	0.0116252	0.0262501	1.9346	0.240896	1.58087
3BP5L_MOUSE|Q99LH9_S342	Late-Uninfected	0.237519	0.0864889	19.4428	0.0126609	0.030736	1.89754	0.237519	1.51235
3BP5L_MOUSE|Q99LH9_S349	KO_Early-WT_Early	-0.415407	0.135306	19.4428	0.00618116	0.0454141	2.20893	0.415407	1.34281
3BP5L_MOUSE|Q99LH9_S349	KO_Late-WT_Late	-0.361731	0.135306	19.4428	0.0148316	0.0742373	1.82881	0.361731	1.12938
3BP5L_MOUSE|Q99LH9_S349	KO_Uninfected-WT_Uninfected	0.019872	0.156238	19.4428	0.900096	0.956616	0.0457114	0.019872	0.0192625
3BP5L_MOUSE|Q99LH9_S349	KO_Early-KO_Uninfected	-0.163004	0.146147	19.4428	0.2783	0.41036	0.555486	0.163004	0.386835
3BP5L_MOUSE|Q99LH9_S349	KO_Late-KO_Uninfected	-0.0889697	0.146147	19.4428	0.549725	0.685431	0.259855	0.0889697	0.164036
3BP5L_MOUSE|Q99LH9_S349	WT_Early-Wt_Uninfected	0.272275	0.146147	19.4428	0.0776374	0.147683	1.10993	0.272275	0.83067
3BP5L_MOUSE|Q99LH9_S349	WT_Late-Wt_Uninfected	0.292633	0.146147	19.4428	0.0593968	0.126405	1.22624	0.292633	0.898236
3BP5L_MOUSE|Q99LH9_S349	Infected-Uninfected	0.0782337	0.0916025	19.4428	0.403474	0.489488	0.394185	0.0782337	0.310258
3BP5L_MOUSE|Q99LH9_S349	KO-WT	-0.252422	0.0823445	19.4428	0.00624658	0.0236942	2.20436	0.252422	1.62536
3BP5L_MOUSE|Q99LH9_S349	Early-Uninfected	0.0546357	0.103342	19.4428	0.603004	0.679525	0.21968	0.0546357	0.167795
3BP5L_MOUSE|Q99LH9_S349	Late-Uninfected	0.101832	0.103342	19.4428	0.336537	0.43759	0.472967	0.101832	0.358933
3BP5L_MOUSE|Q99LH9_S361	KO_Early-WT_Early	-0.451356	0.143815	19.4428	0.00530155	0.0414973	2.2756	0.451356	1.38198
3BP5L_MOUSE|Q99LH9_S361	KO_Late-WT_Late	-0.453117	0.143815	19.4428	0.00515732	0.0377788	2.28758	0.453117	1.42275
3BP5L_MOUSE|Q99LH9_S361	KO_Uninfected-WT_Uninfected	-0.0317075	0.166063	19.4428	0.850555	0.93307	0.0702975	0.0317075	0.0300858
3BP5L_MOUSE|Q99LH9_S361	KO_Early-KO_Uninfected	-0.0377439	0.155338	19.4428	0.810566	0.873952	0.0912115	0.0377439	0.0585122
3BP5L_MOUSE|Q99LH9_S361	KO_Late-KO_Uninfected	-0.149523	0.155338	19.4428	0.347585	0.500058	0.458939	0.149523	0.300979
3BP5L_MOUSE|Q99LH9_S361	WT_Early-Wt_Uninfected	0.381905	0.155338	19.4428	0.0234796	0.0579917	1.62931	0.381905	1.23663
3BP5L_MOUSE|Q99LH9_S361	WT_Late-Wt_Uninfected	0.271886	0.155338	19.4428	0.095833	0.181282	1.01848	0.271886	0.741644
3BP5L_MOUSE|Q99LH9_S361	Infected-Uninfected	0.116631	0.097363	19.4428	0.245356	0.325528	0.610203	0.116631	0.487412
3BP5L_MOUSE|Q99LH9_S361	KO-WT	-0.31206	0.0875229	19.4428	0.00200606	0.0102179	2.69766	0.31206	1.99064
3BP5L_MOUSE|Q99LH9_S361	Early-Uninfected	0.17208	0.10984	19.4428	0.13333	0.201413	0.875072	0.17208	0.695912
3BP5L_MOUSE|Q99LH9_S361	Late-Uninfected	0.0611817	0.10984	19.4428	0.583879	0.673287	0.233677	0.0611817	0.1718
3BP5L_MOUSE|Q99LH9_T13	KO_Early-WT_Early	-0.403799	0.194849	8.44283	0.0701396	0.2046	1.15404	0.403799	0.689094
3BP5L_MOUSE|Q99LH9_T13	KO_Late-WT_Late	-0.376889	0.194849	8.44283	0.0872246	0.225851	1.05936	0.376889	0.646179
3BP5L_MOUSE|Q99LH9_T13	KO_Uninfected-WT_Uninfected	-0.286465	0.238641	8.44283	0.262579	0.524473	0.58074	0.286465	0.280277
3BP5L_MOUSE|Q99LH9_T13	KO_Early-KO_Uninfected	-0.366696	0.194849	8.44283	0.0946824	0.17971	1.02373	0.366696	0.745427
3BP5L_MOUSE|Q99LH9_T13	KO_Late-KO_Uninfected	-0.088247	0.194849	8.44283	0.662035	0.775188	0.179119	0.088247	0.110593
3BP5L_MOUSE|Q99LH9_T13	WT_Early-Wt_Uninfected	-0.249363	0.238641	8.44283	0.325049	0.444748	0.488051	0.249363	0.351886
3BP5L_MOUSE|Q99LH9_T13	WT_Late-Wt_Uninfected	0.00217637	0.238641	8.44283	0.992935	0.995621	0.00307903	0.00217637	0.00190601
3BP5L_MOUSE|Q99LH9_T13	Infected-Uninfected	-0.175532	0.137779	8.44283	0.23661	0.315889	0.625968	0.175532	0.500465
3BP5L_MOUSE|Q99LH9_T13	KO-WT	-0.355718	0.12151	8.44283	0.0179988	0.0518133	1.74476	0.355718	1.28556
3BP5L_MOUSE|Q99LH9_T13	Early-Uninfected	-0.308029	0.154042	8.44283	0.0786885	0.129704	1.10409	0.308029	0.887048
3BP5L_MOUSE|Q99LH9_T13	Late-Uninfected	-0.0430353	0.154042	8.44283	0.78668	0.841522	0.104202	0.0430353	0.0749344
41_MOUSE|P48193_S543	KO_Early-WT_Early	-0.276912	0.0970202	19.4428	0.00999204	0.0614587	2.00035	0.276912	1.21142
41_MOUSE|P48193_S543	KO_Late-WT_Late	-0.00417089	0.0970202	19.4428	0.966148	0.982238	0.0149563	0.00417089	0.0077832
41_MOUSE|P48193_S543	KO_Uninfected-WT_Uninfected	-0.115915	0.112029	19.4428	0.313514	0.575738	0.503743	0.115915	0.239775
41_MOUSE|P48193_S543	KO_Early-KO_Uninfected	-0.109569	0.104794	19.4428	0.308586	0.443573	0.510623	0.109569	0.353035
41_MOUSE|P48193_S543	KO_Late-KO_Uninfected	-0.0757535	0.104794	19.4428	0.478359	0.62466	0.320246	0.0757535	0.204356
41_MOUSE|P48193_S543	WT_Early-Wt_Uninfected	0.0514282	0.104794	19.4428	0.629092	0.723631	0.201286	0.0514282	0.140483
41_MOUSE|P48193_S543	WT_Late-Wt_Uninfected	-0.187498	0.104794	19.4428	0.0891725	0.171972	1.04977	0.187498	0.764542
41_MOUSE|P48193_S543	Infected-Uninfected	-0.080348	0.065683	19.4428	0.235847	0.315151	0.627369	0.080348	0.501482
41_MOUSE|P48193_S543	KO-WT	-0.132333	0.0590446	19.4428	0.0368602	0.0880824	1.43344	0.132333	1.05511
41_MOUSE|P48193_S543	Early-Uninfected	-0.0290704	0.0741004	19.4428	0.699096	0.762884	0.155463	0.0290704	0.117541
41_MOUSE|P48193_S543	Late-Uninfected	-0.131626	0.0741004	19.4428	0.0913332	0.154423	1.03937	0.131626	0.811288
41_MOUSE|P48193_S552	KO_Early-WT_Early	-0.703913	0.158637	8.44283	0.00190643	0.0218279	2.71978	0.703913	1.66099
41_MOUSE|P48193_S552	KO_Late-WT_Late	-0.371451	0.158637	8.44283	0.0456957	0.15141	1.34012	0.371451	0.819845
41_MOUSE|P48193_S552	KO_Uninfected-WT_Uninfected	-0.271923	0.194289	8.44283	0.197294	0.449909	0.704887	0.271923	0.346875
41_MOUSE|P48193_S552	KO_Early-KO_Uninfected	-0.546652	0.158637	8.44283	0.0080592	0.0255085	2.09371	0.546652	1.59332
41_MOUSE|P48193_S552	KO_Late-KO_Uninfected	-0.19568	0.158637	8.44283	0.25062	0.396101	0.600984	0.19568	0.402194
41_MOUSE|P48193_S552	WT_Early-Wt_Uninfected	-0.114662	0.194289	8.44283	0.570539	0.67429	0.243715	0.114662	0.171153
41_MOUSE|P48193_S552	WT_Late-Wt_Uninfected	-0.0961516	0.194289	8.44283	0.6333	0.732127	0.19839	0.0961516	0.135413
41_MOUSE|P48193_S552	Infected-Uninfected	-0.238286	0.112173	8.44283	0.0645946	0.107259	1.1898	0.238286	0.969566
41_MOUSE|P48193_S552	KO-WT	-0.449096	0.0989273	8.44283	0.00165594	0.00888473	2.78096	0.449096	2.05136
41_MOUSE|P48193_S552	Early-Uninfected	-0.330657	0.125413	8.44283	0.0285387	0.0554838	1.54457	0.330657	1.25583
41_MOUSE|P48193_S552	Late-Uninfected	-0.145916	0.125413	8.44283	0.27646	0.374867	0.558367	0.145916	0.426123
41_MOUSE|P48193_S556	KO_Early-WT_Early	-0.407568	0.101528	19.4428	0.000713185	0.0117584	3.1468	0.407568	1.92965
41_MOUSE|P48193_S556	KO_Late-WT_Late	-0.39185	0.101528	19.4428	0.00101947	0.0133453	2.99162	0.39185	1.87467
41_MOUSE|P48193_S556	KO_Uninfected-WT_Uninfected	-0.208508	0.117234	19.4428	0.0909534	0.296106	1.04118	0.208508	0.528553
41_MOUSE|P48193_S556	KO_Early-KO_Uninfected	-0.30895	0.109662	19.4428	0.0108369	0.0322804	1.96509	0.30895	1.49106
41_MOUSE|P48193_S556	KO_Late-KO_Uninfected	-0.12299	0.109662	19.4428	0.27572	0.423657	0.559532	0.12299	0.372986
41_MOUSE|P48193_S556	WT_Early-Wt_Uninfected	-0.10989	0.109662	19.4428	0.328617	0.448413	0.483311	0.10989	0.348322
41_MOUSE|P48193_S556	WT_Late-Wt_Uninfected	0.0603521	0.109662	19.4428	0.588351	0.695048	0.230364	0.0603521	0.157985
41_MOUSE|P48193_S556	Infected-Uninfected	-0.12037	0.0687345	19.4428	0.0956683	0.14902	1.01923	0.12037	0.826754
41_MOUSE|P48193_S556	KO-WT	-0.335975	0.0617877	19.4428	2.79135e-05	0.000457602	4.55419	0.335975	3.33951
41_MOUSE|P48193_S556	Early-Uninfected	-0.20942	0.0775429	19.4428	0.0139802	0.0306003	1.85449	0.20942	1.51427
41_MOUSE|P48193_S556	Late-Uninfected	-0.0313192	0.0775429	19.4428	0.690698	0.76384	0.160712	0.0313192	0.116997
41_MOUSE|P48193_S561	KO_Early-WT_Early	-0.389384	0.147627	8.44283	0.02849	0.116723	1.54531	0.389384	0.932844
41_MOUSE|P48193_S561	KO_Late-WT_Late	-0.187322	0.147627	8.44283	0.238347	0.429193	0.62279	0.187322	0.367347
41_MOUSE|P48193_S561	KO_Uninfected-WT_Uninfected	-0.142669	0.180806	8.44283	0.451658	0.692553	0.34519	0.142669	0.159547
41_MOUSE|P48193_S561	KO_Early-KO_Uninfected	-0.278228	0.147627	8.44283	0.0942804	0.179109	1.02558	0.278228	0.746882
41_MOUSE|P48193_S561	KO_Late-KO_Uninfected	0.105071	0.147627	8.44283	0.495823	0.639733	0.304674	0.105071	0.194001
41_MOUSE|P48193_S561	WT_Early-Wt_Uninfected	-0.0315131	0.180806	8.44283	0.865743	0.907131	0.062611	0.0315131	0.04233
41_MOUSE|P48193_S561	WT_Late-Wt_Uninfected	0.149724	0.180806	8.44283	0.430402	0.555891	0.366126	0.149724	0.25501
41_MOUSE|P48193_S561	Infected-Uninfected	-0.0137363	0.104388	8.44283	0.898392	0.923898	0.0465342	0.0137363	0.0343761
41_MOUSE|P48193_S561	KO-WT	-0.239791	0.0920618	8.44283	0.0300245	0.0756403	1.52252	0.239791	1.12125
41_MOUSE|P48193_S561	Early-Uninfected	-0.154871	0.11671	8.44283	0.219283	0.301913	0.658996	0.154871	0.520118
41_MOUSE|P48193_S561	Late-Uninfected	0.127398	0.11671	8.44283	0.305187	0.405185	0.515435	0.127398	0.392347
41_MOUSE|P48193_S58	KO_Early-WT_Early	-0.571525	0.130654	8.44283	0.00208048	0.0229956	2.68184	0.571525	1.63835
41_MOUSE|P48193_S58	KO_Late-WT_Late	-0.517433	0.130654	8.44283	0.00374942	0.0309428	2.42604	0.517433	1.50944
41_MOUSE|P48193_S58	KO_Uninfected-WT_Uninfected	-0.684545	0.160018	8.44283	0.00238104	0.0397013	2.62323	0.684545	1.4012
41_MOUSE|P48193_S58	KO_Early-KO_Uninfected	-0.605161	0.130654	8.44283	0.00146075	0.00648411	2.83542	0.605161	2.18815
41_MOUSE|P48193_S58	KO_Late-KO_Uninfected	-0.240556	0.130654	8.44283	0.100912	0.203195	0.996057	0.240556	0.692088
41_MOUSE|P48193_S58	WT_Early-Wt_Uninfected	-0.718181	0.160018	8.44283	0.00177728	0.00740827	2.75024	0.718181	2.13028
41_MOUSE|P48193_S58	WT_Late-Wt_Uninfected	-0.407667	0.160018	8.44283	0.0328833	0.0804296	1.48302	0.407667	1.09458
41_MOUSE|P48193_S58	Infected-Uninfected	-0.492891	0.0923866	8.44283	0.000583854	0.00202299	3.2337	0.492891	2.69401
41_MOUSE|P48193_S58	KO-WT	-0.591168	0.0814773	8.44283	6.66134e-05	0.000873285	4.17644	0.591168	3.05884
41_MOUSE|P48193_S58	Early-Uninfected	-0.661671	0.103291	8.44283	0.000164639	0.00072692	3.78347	0.661671	3.13851
41_MOUSE|P48193_S58	Late-Uninfected	-0.324112	0.103291	8.44283	0.0129484	0.031311	1.88778	0.324112	1.5043
41_MOUSE|P48193_S678	KO_Early-WT_Early	-0.379552	0.0954823	19.4428	0.000780828	0.0123746	3.10744	0.379552	1.90747
41_MOUSE|P48193_S678	KO_Late-WT_Late	-0.435064	0.0954823	19.4428	0.00020458	0.0048295	3.68914	0.435064	2.3161
41_MOUSE|P48193_S678	KO_Uninfected-WT_Uninfected	-0.00981627	0.110253	19.4428	0.929966	0.970434	0.031533	0.00981627	0.0130339
41_MOUSE|P48193_S678	KO_Early-KO_Uninfected	-0.289909	0.103133	19.4428	0.0109868	0.0326536	1.95913	0.289909	1.48607
41_MOUSE|P48193_S678	KO_Late-KO_Uninfected	-0.292799	0.103133	19.4428	0.0103305	0.0364843	1.98588	0.292799	1.43789
41_MOUSE|P48193_S678	WT_Early-Wt_Uninfected	0.0798269	0.103133	19.4428	0.448228	0.565274	0.348501	0.0798269	0.247741
41_MOUSE|P48193_S678	WT_Late-Wt_Uninfected	0.132449	0.103133	19.4428	0.214145	0.331925	0.669292	0.132449	0.47896
41_MOUSE|P48193_S678	Infected-Uninfected	-0.092608	0.0646418	19.4428	0.167846	0.237528	0.77509	0.092608	0.624285
41_MOUSE|P48193_S678	KO-WT	-0.274811	0.0581086	19.4428	0.00013777	0.00147477	3.86084	0.274811	2.83128
41_MOUSE|P48193_S678	Early-Uninfected	-0.105041	0.0729258	19.4428	0.165669	0.240516	0.78076	0.105041	0.618857
41_MOUSE|P48193_S678	Late-Uninfected	-0.080175	0.0729258	19.4428	0.285019	0.384175	0.545126	0.080175	0.415471
41_MOUSE|P48193_S703	KO_Early-WT_Early	-1.03197	0.126268	8.44283	2.73179e-05	0.00133391	4.56355	1.03197	2.87487
41_MOUSE|P48193_S703	KO_Late-WT_Late	-0.801668	0.126268	8.44283	0.000175456	0.00440005	3.75583	0.801668	2.35654
41_MOUSE|P48193_S703	KO_Uninfected-WT_Uninfected	-0.255522	0.154647	8.44283	0.135092	0.365349	0.869371	0.255522	0.437292
41_MOUSE|P48193_S703	KO_Early-KO_Uninfected	-0.504045	0.126268	8.44283	0.00358179	0.0133268	2.4459	0.504045	1.87528
41_MOUSE|P48193_S703	KO_Late-KO_Uninfected	-0.112313	0.126268	8.44283	0.398381	0.550784	0.399701	0.112313	0.259019
41_MOUSE|P48193_S703	WT_Early-Wt_Uninfected	0.272403	0.154647	8.44283	0.114216	0.199458	0.942274	0.272403	0.700148
41_MOUSE|P48193_S703	WT_Late-Wt_Uninfected	0.433833	0.154647	8.44283	0.0218284	0.0589432	1.66098	0.433833	1.22957
41_MOUSE|P48193_S703	Infected-Uninfected	0.0224694	0.0892852	8.44283	0.807323	0.851501	0.0929527	0.0224694	0.069815
41_MOUSE|P48193_S703	KO-WT	-0.696387	0.0787421	8.44283	1.49465e-05	0.000285748	4.82546	0.696387	3.54402
41_MOUSE|P48193_S703	Early-Uninfected	-0.115821	0.0998239	8.44283	0.277701	0.365842	0.556423	0.115821	0.436706
41_MOUSE|P48193_S703	Late-Uninfected	0.16076	0.0998239	8.44283	0.143987	0.22247	0.841678	0.16076	0.652728
41_MOUSE|P48193_S94	KO_Early-WT_Early	-1.26368	0.117347	19.4428	1.22531e-09	1.14417e-06	8.91175	1.26368	5.94151
41_MOUSE|P48193_S94	KO_Late-WT_Late	-1.11912	0.117347	19.4428	9.07862e-09	4.97587e-06	8.04198	1.11912	5.30313
41_MOUSE|P48193_S94	KO_Uninfected-WT_Uninfected	-0.947853	0.1355	19.4428	1.01766e-06	0.000261952	5.9924	0.947853	3.58178
41_MOUSE|P48193_S94	KO_Early-KO_Uninfected	-0.820394	0.126749	19.4428	2.98631e-06	4.46689e-05	5.52486	0.820394	4.35
41_MOUSE|P48193_S94	KO_Late-KO_Uninfected	-0.278107	0.126749	19.4428	0.0405608	0.102898	1.39189	0.278107	0.987591
41_MOUSE|P48193_S94	WT_Early-Wt_Uninfected	-0.504572	0.126749	19.4428	0.000770491	0.00379302	3.11323	0.504572	2.42101
41_MOUSE|P48193_S94	WT_Late-Wt_Uninfected	-0.106839	0.126749	19.4428	0.409522	0.535452	0.387723	0.106839	0.271279
41_MOUSE|P48193_S94	Infected-Uninfected	-0.427478	0.0794441	19.4428	3.16641e-05	0.000177752	4.49943	0.427478	3.75019
41_MOUSE|P48193_S94	KO-WT	-1.11022	0.0714149	19.4428	1.99803e-12	1.62504e-09	11.6994	1.11022	8.78913
41_MOUSE|P48193_S94	Early-Uninfected	-0.662483	0.089625	19.4428	4.6082e-07	5.23558e-06	6.33647	0.662483	5.28104
41_MOUSE|P48193_S94	Late-Uninfected	-0.192473	0.089625	19.4428	0.0445566	0.0859329	1.35109	0.192473	1.06584
41_MOUSE|P48193_S97	KO_Early-WT_Early	-0.497227	0.118076	19.4428	0.000452945	0.00874491	3.34395	0.497227	2.05824
41_MOUSE|P48193_S97	KO_Late-WT_Late	-0.575496	0.118076	19.4428	9.9089e-05	0.00304662	4.00397	0.575496	2.51618
41_MOUSE|P48193_S97	KO_Uninfected-WT_Uninfected	-0.616329	0.136343	19.4428	0.000222221	0.0106883	3.65321	0.616329	1.97109
41_MOUSE|P48193_S97	KO_Early-KO_Uninfected	2.25176	0.127537	19.4428	1.96782e-13	1.15342e-10	12.706	2.25176	9.93801
41_MOUSE|P48193_S97	KO_Late-KO_Uninfected	1.52257	0.127537	19.4428	2.12277e-10	4.02273e-08	9.6731	1.52257	7.39548
41_MOUSE|P48193_S97	WT_Early-Wt_Uninfected	2.13266	0.127537	19.4428	5.31872e-13	1.79819e-10	12.2742	2.13266	9.74516
41_MOUSE|P48193_S97	WT_Late-Wt_Uninfected	1.48173	0.127537	19.4428	3.38472e-10	5.88474e-08	9.47048	1.48173	7.23027
41_MOUSE|P48193_S97	Infected-Uninfected	1.84718	0.079938	19.4428	1.32221e-15	5.29115e-13	14.8787	1.84718	12.2764
41_MOUSE|P48193_S97	KO-WT	-0.563017	0.0718589	19.4428	1.94868e-07	9.92567e-06	6.71026	0.563017	5.00324
41_MOUSE|P48193_S97	Early-Uninfected	2.19221	0.0901823	19.4428	5.09462e-16	2.47001e-13	15.2929	2.19221	12.6073
41_MOUSE|P48193_S97	Late-Uninfected	1.50215	0.0901823	19.4428	5.71045e-13	1.1898e-10	12.2433	1.50215	9.92452
41_MOUSE|P48193_T560	KO_Early-WT_Early	-0.241098	0.0928904	19.4429	0.0175443	0.0860689	1.75586	0.241098	1.06515
41_MOUSE|P48193_T560	KO_Late-WT_Late	-0.115581	0.0928904	19.4429	0.22819	0.416954	0.641703	0.115581	0.379912
41_MOUSE|P48193_T560	KO_Uninfected-WT_Uninfected	-0.104073	0.107261	19.4429	0.343823	0.603038	0.463665	0.104073	0.219656
41_MOUSE|P48193_T560	KO_Early-KO_Uninfected	-0.373422	0.100333	19.4429	0.00140035	0.00627601	2.85376	0.373422	2.20232
41_MOUSE|P48193_T560	KO_Late-KO_Uninfected	0.0813258	0.100333	19.4429	0.42743	0.577762	0.369135	0.0813258	0.238251
41_MOUSE|P48193_T560	WT_Early-Wt_Uninfected	-0.236397	0.100333	19.4429	0.0290942	0.0685964	1.53619	0.236397	1.1637
41_MOUSE|P48193_T560	WT_Late-Wt_Uninfected	0.0928341	0.100333	19.4429	0.366174	0.493544	0.436313	0.0928341	0.306674
41_MOUSE|P48193_T560	Infected-Uninfected	-0.108915	0.0628871	19.4429	0.0991255	0.153504	1.00381	0.108915	0.813879
41_MOUSE|P48193_T560	KO-WT	-0.153584	0.0565313	19.4429	0.0134995	0.0420409	1.86968	0.153584	1.37633
41_MOUSE|P48193_T560	Early-Uninfected	-0.30491	0.0709462	19.4429	0.000370881	0.00142956	3.43077	0.30491	2.8448
41_MOUSE|P48193_T560	Late-Uninfected	0.0870799	0.0709462	19.4429	0.234324	0.328486	0.630184	0.0870799	0.483483
41_MOUSE|P48193_T704	KO_Early-WT_Early	-0.849847	0.14763	8.44283	0.000348413	0.00728374	3.45791	0.849847	2.13765
41_MOUSE|P48193_T704	KO_Late-WT_Late	-0.582816	0.14763	8.44283	0.00381823	0.0312753	2.41814	0.582816	1.5048
41_MOUSE|P48193_T704	KO_Uninfected-WT_Uninfected	-0.138312	0.18081	8.44283	0.46514	0.702678	0.332417	0.138312	0.153244
41_MOUSE|P48193_T704	KO_Early-KO_Uninfected	-0.534446	0.14763	8.44283	0.00619473	0.0207072	2.20798	0.534446	1.68388
41_MOUSE|P48193_T704	KO_Late-KO_Uninfected	-0.184547	0.14763	8.44283	0.244814	0.389268	0.611163	0.184547	0.409751
41_MOUSE|P48193_T704	WT_Early-Wt_Uninfected	0.177089	0.18081	8.44283	0.354599	0.47414	0.450263	0.177089	0.324094
41_MOUSE|P48193_T704	WT_Late-Wt_Uninfected	0.259958	0.18081	8.44283	0.186518	0.299554	0.729279	0.259958	0.523525
41_MOUSE|P48193_T704	Infected-Uninfected	-0.0704864	0.10439	8.44283	0.517599	0.598203	0.286006	0.0704864	0.223152
41_MOUSE|P48193_T704	KO-WT	-0.523658	0.0920637	8.44283	0.000378327	0.00304035	3.42213	0.523658	2.51708
41_MOUSE|P48193_T704	Early-Uninfected	-0.178678	0.116712	8.44283	0.162352	0.236498	0.789542	0.178678	0.626173
41_MOUSE|P48193_T704	Late-Uninfected	0.0377055	0.116712	8.44283	0.754503	0.815511	0.122339	0.0377055	0.0885704
4EBP1_MOUSE|Q60876_S64	KO_Early-WT_Early	0.579397	0.230162	19.4428	0.0207316	0.0949821	1.68337	0.579397	1.02236
4EBP1_MOUSE|Q60876_S64	KO_Late-WT_Late	-0.192395	0.230162	19.4428	0.413361	0.602652	0.38367	0.192395	0.219933
4EBP1_MOUSE|Q60876_S64	KO_Uninfected-WT_Uninfected	-0.559657	0.265768	19.4428	0.0484338	0.206894	1.31485	0.559657	0.684252
4EBP1_MOUSE|Q60876_S64	KO_Early-KO_Uninfected	0.707566	0.248603	19.4428	0.01017	0.0306535	1.99268	0.707566	1.51352
4EBP1_MOUSE|Q60876_S64	KO_Late-KO_Uninfected	0.117152	0.248603	19.4428	0.642713	0.759408	0.191983	0.117152	0.119525
4EBP1_MOUSE|Q60876_S64	WT_Early-Wt_Uninfected	-0.431488	0.248603	19.4428	0.098449	0.177634	1.00679	0.431488	0.750475
4EBP1_MOUSE|Q60876_S64	WT_Late-Wt_Uninfected	-0.25011	0.248603	19.4428	0.326745	0.453193	0.485791	0.25011	0.343717
4EBP1_MOUSE|Q60876_S64	Infected-Uninfected	0.0357801	0.15582	19.4428	0.820782	0.862701	0.0857721	0.0357801	0.0641398
4EBP1_MOUSE|Q60876_S64	KO-WT	-0.0575515	0.140072	19.4428	0.685661	0.777652	0.163891	0.0575515	0.109215
4EBP1_MOUSE|Q60876_S64	Early-Uninfected	0.138039	0.175789	19.4428	0.44177	0.532027	0.354804	0.138039	0.274066
4EBP1_MOUSE|Q60876_S64	Late-Uninfected	-0.0664787	0.175789	19.4428	0.709399	0.779085	0.149109	0.0664787	0.108415
4EBP1_MOUSE|Q60876_S82	KO_Early-WT_Early	0.563242	0.289491	19.4428	0.066302	0.197786	1.17847	0.563242	0.703805
4EBP1_MOUSE|Q60876_S82	KO_Late-WT_Late	0.219046	0.289491	19.4428	0.458326	0.641718	0.338825	0.219046	0.192656
4EBP1_MOUSE|Q60876_S82	KO_Uninfected-WT_Uninfected	-0.42571	0.334276	19.4428	0.217846	0.473512	0.661851	0.42571	0.324669
4EBP1_MOUSE|Q60876_S82	KO_Early-KO_Uninfected	3.09624	0.312686	19.4428	4.92529e-09	2.51799e-07	8.30757	3.09624	6.59895
4EBP1_MOUSE|Q60876_S82	KO_Late-KO_Uninfected	2.03095	0.312686	19.4428	2.84857e-06	6.44483e-05	5.54537	2.03095	4.19079
4EBP1_MOUSE|Q60876_S82	WT_Early-Wt_Uninfected	2.10728	0.312686	19.4428	1.71624e-06	2.88366e-05	5.76542	2.10728	4.54006
4EBP1_MOUSE|Q60876_S82	WT_Late-Wt_Uninfected	1.38619	0.312686	19.4428	0.000271557	0.00219422	3.56614	1.38619	2.65872
4EBP1_MOUSE|Q60876_S82	Infected-Uninfected	2.15516	0.195987	19.4428	8.61599e-10	2.47683e-08	9.06469	2.15516	7.6061
4EBP1_MOUSE|Q60876_S82	KO-WT	0.118859	0.176179	19.4428	0.50784	0.627564	0.294273	0.118859	0.202342
4EBP1_MOUSE|Q60876_S82	Early-Uninfected	2.60176	0.221103	19.4428	2.72035e-10	9.51477e-09	9.56537	2.60176	8.0216
4EBP1_MOUSE|Q60876_S82	Late-Uninfected	1.70857	0.221103	19.4428	2.39534e-07	4.32896e-06	6.62063	1.70857	5.36362
4ET_MOUSE|Q9EST3_S137	KO_Early-WT_Early	0.0107454	0.112085	19.4428	0.924606	0.959415	0.0340432	0.0107454	0.0179937
4ET_MOUSE|Q9EST3_S137	KO_Late-WT_Late	0.101877	0.112085	19.4428	0.374519	0.567786	0.426526	0.101877	0.245815
4ET_MOUSE|Q9EST3_S137	KO_Uninfected-WT_Uninfected	0.264155	0.129424	19.4428	0.055062	0.223503	1.25915	0.264155	0.650718
4ET_MOUSE|Q9EST3_S137	KO_Early-KO_Uninfected	-0.606553	0.121065	19.4428	7.27655e-05	0.000583699	4.13807	0.606553	3.23381
4ET_MOUSE|Q9EST3_S137	KO_Late-KO_Uninfected	-0.850661	0.121065	19.4428	9.55328e-07	2.76442e-05	6.01985	0.850661	4.5584
4ET_MOUSE|Q9EST3_S137	WT_Early-Wt_Uninfected	-0.353143	0.121065	19.4428	0.00869711	0.026378	2.06062	0.353143	1.57876
4ET_MOUSE|Q9EST3_S137	WT_Late-Wt_Uninfected	-0.688382	0.121065	19.4428	1.6133e-05	0.000261383	4.79229	0.688382	3.58272
4ET_MOUSE|Q9EST3_S137	Infected-Uninfected	-0.624685	0.0758816	19.4428	9.21292e-08	1.32724e-06	7.0356	0.624685	5.87705
4ET_MOUSE|Q9EST3_S137	KO-WT	0.125592	0.0682125	19.4428	0.0809045	0.159438	1.09203	0.125592	0.797409
4ET_MOUSE|Q9EST3_S137	Early-Uninfected	-0.479848	0.085606	19.4428	1.92643e-05	0.000118921	4.71525	0.479848	3.92474
4ET_MOUSE|Q9EST3_S137	Late-Uninfected	-0.769521	0.085606	19.4428	2.34082e-08	6.25705e-07	7.63063	0.769521	6.20363
4ET_MOUSE|Q9EST3_S344	KO_Early-WT_Early	-0.241214	0.353468	8.44283	0.513257	0.692234	0.289665	0.241214	0.159747
4ET_MOUSE|Q9EST3_S344	KO_Late-WT_Late	0.202817	0.353468	8.44283	0.581068	0.738662	0.235773	0.202817	0.131554
4ET_MOUSE|Q9EST3_S344	KO_Uninfected-WT_Uninfected	-0.029429	0.432908	8.44283	0.947384	0.978139	0.0234738	0.029429	0.00959941
4ET_MOUSE|Q9EST3_S344	KO_Early-KO_Uninfected	-2.26699	0.353468	8.44283	0.00016323	0.00111262	3.7872	2.26699	2.95365
4ET_MOUSE|Q9EST3_S344	KO_Late-KO_Uninfected	-1.52712	0.353468	8.44283	0.00224318	0.0112765	2.64914	1.52712	1.94783
4ET_MOUSE|Q9EST3_S344	WT_Early-Wt_Uninfected	-2.05521	0.432908	8.44283	0.00125006	0.00558264	2.90307	2.05521	2.25316
4ET_MOUSE|Q9EST3_S344	WT_Late-Wt_Uninfected	-1.75937	0.432908	8.44283	0.00322735	0.0139199	2.49115	1.75937	1.85637
4ET_MOUSE|Q9EST3_S344	Infected-Uninfected	-1.90217	0.249939	8.44283	4.6719e-05	0.000244364	4.33051	1.90217	3.61196
4ET_MOUSE|Q9EST3_S344	KO-WT	-0.0226085	0.220426	8.44283	0.920701	0.949006	0.0358814	0.0226085	0.0227311
4ET_MOUSE|Q9EST3_S344	Early-Uninfected	-2.1611	0.279441	8.44283	4.14322e-05	0.000226092	4.38266	2.1611	3.64571
4ET_MOUSE|Q9EST3_S344	Late-Uninfected	-1.64325	0.279441	8.44283	0.000300717	0.00147211	3.52184	1.64325	2.83206
4ET_MOUSE|Q9EST3_S563	KO_Early-WT_Early	-0.196504	0.13984	8.44283	0.195672	0.383673	0.708472	0.196504	0.416039
4ET_MOUSE|Q9EST3_S563	KO_Late-WT_Late	0.0173371	0.13984	8.44283	0.904234	0.947218	0.0437192	0.0173371	0.0235502
4ET_MOUSE|Q9EST3_S563	KO_Uninfected-WT_Uninfected	-0.0830742	0.171269	8.44283	0.639975	0.819201	0.193837	0.0830742	0.0866096
4ET_MOUSE|Q9EST3_S563	KO_Early-KO_Uninfected	-0.210668	0.13984	8.44283	0.168406	0.280037	0.773641	0.210668	0.552785
4ET_MOUSE|Q9EST3_S563	KO_Late-KO_Uninfected	-0.156016	0.13984	8.44283	0.295308	0.445552	0.529724	0.156016	0.351101
4ET_MOUSE|Q9EST3_S563	WT_Early-Wt_Uninfected	-0.0972378	0.171269	8.44283	0.584983	0.687109	0.232857	0.0972378	0.162974
4ET_MOUSE|Q9EST3_S563	WT_Late-Wt_Uninfected	-0.256427	0.171269	8.44283	0.170753	0.280329	0.767631	0.256427	0.552332
4ET_MOUSE|Q9EST3_S563	Infected-Uninfected	-0.180087	0.0988819	8.44283	0.104095	0.159884	0.98257	0.180087	0.796195
4ET_MOUSE|Q9EST3_S563	KO-WT	-0.0874137	0.0872057	8.44283	0.344018	0.472014	0.463419	0.0874137	0.326045
4ET_MOUSE|Q9EST3_S563	Early-Uninfected	-0.153953	0.110553	8.44283	0.199331	0.279605	0.700425	0.153953	0.553456
4ET_MOUSE|Q9EST3_S563	Late-Uninfected	-0.206222	0.110553	8.44283	0.0971711	0.16213	1.01246	0.206222	0.790137
4ET_MOUSE|Q9EST3_S76	KO_Early-WT_Early	-0.519993	0.186784	8.44283	0.0225808	0.100602	1.64626	0.519993	0.997393
4ET_MOUSE|Q9EST3_S76	KO_Late-WT_Late	-0.557987	0.186784	8.44283	0.0163821	0.0791845	1.78563	0.557987	1.10136
4ET_MOUSE|Q9EST3_S76	KO_Uninfected-WT_Uninfected	-0.383422	0.228763	8.44283	0.130268	0.359022	0.885164	0.383422	0.444879
4ET_MOUSE|Q9EST3_S76	KO_Early-KO_Uninfected	-0.351955	0.186784	8.44283	0.0943364	0.179154	1.02532	0.351955	0.746775
4ET_MOUSE|Q9EST3_S76	KO_Late-KO_Uninfected	-0.390187	0.186784	8.44283	0.0683173	0.151864	1.16547	0.390187	0.818545
4ET_MOUSE|Q9EST3_S76	WT_Early-Wt_Uninfected	-0.215383	0.228763	8.44283	0.372598	0.492177	0.428759	0.215383	0.307878
4ET_MOUSE|Q9EST3_S76	WT_Late-Wt_Uninfected	-0.215621	0.228763	8.44283	0.372095	0.499469	0.429346	0.215621	0.301492
4ET_MOUSE|Q9EST3_S76	Infected-Uninfected	-0.293286	0.132076	8.44283	0.0554187	0.0942881	1.25634	0.293286	1.02554
4ET_MOUSE|Q9EST3_S76	KO-WT	-0.487134	0.11648	8.44283	0.00272637	0.0128486	2.56442	0.487134	1.89115
4ET_MOUSE|Q9EST3_S76	Early-Uninfected	-0.283669	0.147666	8.44283	0.0890571	0.143779	1.05033	0.283669	0.842304
4ET_MOUSE|Q9EST3_S76	Late-Uninfected	-0.302904	0.147666	8.44283	0.0725212	0.128037	1.13953	0.302904	0.892664
4ET_MOUSE|Q9EST3_S77	KO_Early-WT_Early	0.0671224	0.169953	19.4428	0.697182	0.827106	0.156654	0.0671224	0.0824387
4ET_MOUSE|Q9EST3_S77	KO_Late-WT_Late	0.0846699	0.169953	19.4428	0.623935	0.769818	0.20486	0.0846699	0.113612
4ET_MOUSE|Q9EST3_S77	KO_Uninfected-WT_Uninfected	-0.175148	0.196245	19.4428	0.383041	0.637929	0.416755	0.175148	0.195227
4ET_MOUSE|Q9EST3_S77	KO_Early-KO_Uninfected	0.00209276	0.183571	19.4428	0.99102	0.994295	0.00391748	0.00209276	0.00248493
4ET_MOUSE|Q9EST3_S77	KO_Late-KO_Uninfected	-0.092634	0.183571	19.4428	0.619495	0.741182	0.207963	0.092634	0.130075
4ET_MOUSE|Q9EST3_S77	WT_Early-Wt_Uninfected	-0.240178	0.183571	19.4428	0.206006	0.314219	0.686121	0.240178	0.502768
4ET_MOUSE|Q9EST3_S77	WT_Late-Wt_Uninfected	-0.352452	0.183571	19.4428	0.0696536	0.142541	1.15706	0.352452	0.846059
4ET_MOUSE|Q9EST3_S77	Infected-Uninfected	-0.170793	0.115059	19.4428	0.153737	0.220759	0.813222	0.170793	0.656082
4ET_MOUSE|Q9EST3_S77	KO-WT	-0.00778518	0.10343	19.4428	0.940769	0.962217	0.0265169	0.00778518	0.016727
4ET_MOUSE|Q9EST3_S77	Early-Uninfected	-0.119042	0.129804	19.4428	0.37033	0.461855	0.431411	0.119042	0.335495
4ET_MOUSE|Q9EST3_S77	Late-Uninfected	-0.222543	0.129804	19.4428	0.102343	0.16908	0.989943	0.222543	0.771908
4ET_MOUSE|Q9EST3_S949	KO_Early-WT_Early	-0.0542952	0.107628	19.4428	0.6196	0.772914	0.207888	0.0542952	0.111869
4ET_MOUSE|Q9EST3_S949	KO_Late-WT_Late	-0.0198035	0.107628	19.4428	0.855919	0.917923	0.0675671	0.0198035	0.0371939
4ET_MOUSE|Q9EST3_S949	KO_Uninfected-WT_Uninfected	0.0172234	0.124278	19.4428	0.891201	0.953111	0.0500242	0.0172234	0.0208564
4ET_MOUSE|Q9EST3_S949	KO_Early-KO_Uninfected	-0.127214	0.116252	19.4428	0.287195	0.420327	0.541824	0.127214	0.376413
4ET_MOUSE|Q9EST3_S949	KO_Late-KO_Uninfected	-0.273879	0.116252	19.4428	0.0291068	0.0799502	1.53601	0.273879	1.09718
4ET_MOUSE|Q9EST3_S949	WT_Early-Wt_Uninfected	-0.0556958	0.116252	19.4428	0.637214	0.730227	0.195715	0.0556958	0.136542
4ET_MOUSE|Q9EST3_S949	WT_Late-Wt_Uninfected	-0.236852	0.116252	19.4428	0.0554522	0.119698	1.25608	0.236852	0.921914
4ET_MOUSE|Q9EST3_S949	Infected-Uninfected	-0.17341	0.0728645	19.4428	0.0276894	0.0524555	1.55769	0.17341	1.28021
4ET_MOUSE|Q9EST3_S949	KO-WT	-0.0189584	0.0655003	19.4428	0.775309	0.846081	0.110525	0.0189584	0.0725879
4ET_MOUSE|Q9EST3_S949	Early-Uninfected	-0.0914551	0.0822023	19.4428	0.279464	0.367742	0.553674	0.0914551	0.434457
4ET_MOUSE|Q9EST3_S949	Late-Uninfected	-0.255366	0.0822023	19.4428	0.00569599	0.0160216	2.24443	0.255366	1.79529
4ET_MOUSE|Q9EST3_T767	KO_Early-WT_Early	-0.0457431	0.123558	8.44283	0.720339	0.841692	0.142463	0.0457431	0.0748467
4ET_MOUSE|Q9EST3_T767	KO_Late-WT_Late	-0.119892	0.123558	8.44283	0.358859	0.553472	0.445076	0.119892	0.256904
4ET_MOUSE|Q9EST3_T767	KO_Uninfected-WT_Uninfected	-0.106612	0.151328	8.44283	0.500083	0.729586	0.300958	0.106612	0.136923
4ET_MOUSE|Q9EST3_T767	KO_Early-KO_Uninfected	-0.858685	0.123558	8.44283	9.14122e-05	0.000696356	4.039	0.858685	3.15717
4ET_MOUSE|Q9EST3_T767	KO_Late-KO_Uninfected	-1.2531	0.123558	8.44283	5.14816e-06	0.000103473	5.28835	1.2531	3.98517
4ET_MOUSE|Q9EST3_T767	WT_Early-Wt_Uninfected	-0.919554	0.151328	8.44283	0.000239188	0.00150042	3.62126	0.919554	2.82379
4ET_MOUSE|Q9EST3_T767	WT_Late-Wt_Uninfected	-1.23982	0.151328	8.44283	2.6813e-05	0.00038516	4.57165	1.23982	3.41436
4ET_MOUSE|Q9EST3_T767	Infected-Uninfected	-1.06779	0.0873691	8.44283	1.16769e-06	1.12404e-05	5.93267	1.06779	4.94922
4ET_MOUSE|Q9EST3_T767	KO-WT	-0.090749	0.0770523	8.44283	0.271023	0.395927	0.566994	0.090749	0.402385
4ET_MOUSE|Q9EST3_T767	Early-Uninfected	-0.88912	0.0976816	8.44283	1.19686e-05	7.93012e-05	4.92196	0.88912	4.10072
4ET_MOUSE|Q9EST3_T767	Late-Uninfected	-1.24646	0.0976816	8.44283	8.25055e-07	1.19887e-05	6.08352	1.24646	4.92123
6PGD_MOUSE|Q9DCD0_S257	KO_Early-WT_Early	1.09575	0.267327	19.4428	0.000586723	0.0104762	3.23157	1.09575	1.97979
6PGD_MOUSE|Q9DCD0_S257	KO_Late-WT_Late	0.674229	0.267327	19.4428	0.0205224	0.0911683	1.68777	0.674229	1.04016
6PGD_MOUSE|Q9DCD0_S257	KO_Uninfected-WT_Uninfected	0.98828	0.308682	19.4428	0.00459751	0.0574023	2.33748	0.98828	1.24107
6PGD_MOUSE|Q9DCD0_S257	KO_Early-KO_Uninfected	-0.290177	0.288746	19.4428	0.327262	0.462557	0.485104	0.290177	0.334835
6PGD_MOUSE|Q9DCD0_S257	KO_Late-KO_Uninfected	-0.756441	0.288746	19.4428	0.0166539	0.0522524	1.77849	0.756441	1.28189
6PGD_MOUSE|Q9DCD0_S257	WT_Early-Wt_Uninfected	-0.397647	0.288746	19.4428	0.184115	0.288384	0.73491	0.397647	0.540028
6PGD_MOUSE|Q9DCD0_S257	WT_Late-Wt_Uninfected	-0.44239	0.288746	19.4428	0.141606	0.243845	0.848918	0.44239	0.612886
6PGD_MOUSE|Q9DCD0_S257	Infected-Uninfected	-0.471664	0.180981	19.4428	0.017148	0.0350594	1.76579	0.471664	1.4552
6PGD_MOUSE|Q9DCD0_S257	KO-WT	0.919419	0.16269	19.4428	1.74089e-05	0.000316917	4.75923	0.919419	3.49906
6PGD_MOUSE|Q9DCD0_S257	Early-Uninfected	-0.343912	0.204174	19.4428	0.10809	0.169416	0.966216	0.343912	0.771047
6PGD_MOUSE|Q9DCD0_S257	Late-Uninfected	-0.599416	0.204174	19.4428	0.00834126	0.0218871	2.07877	0.599416	1.65981
6PGD_MOUSE|Q9DCD0_S57	KO_Early-WT_Early	1.03993	0.235713	8.44283	0.00197474	0.0223064	2.70449	1.03993	1.65157
6PGD_MOUSE|Q9DCD0_S57	KO_Late-WT_Late	1.20266	0.235713	8.44283	0.000784794	0.0113394	3.10524	1.20266	1.94541
6PGD_MOUSE|Q9DCD0_S57	KO_Uninfected-WT_Uninfected	0.573871	0.288689	8.44283	0.080166	0.276441	1.09601	0.573871	0.558397
6PGD_MOUSE|Q9DCD0_S57	KO_Early-KO_Uninfected	0.167014	0.235713	8.44283	0.4977	0.62492	0.303033	0.167014	0.204176
6PGD_MOUSE|Q9DCD0_S57	KO_Late-KO_Uninfected	0.154449	0.235713	8.44283	0.529759	0.669477	0.275922	0.154449	0.174265
6PGD_MOUSE|Q9DCD0_S57	WT_Early-Wt_Uninfected	-0.299048	0.288689	8.44283	0.329013	0.448711	0.482787	0.299048	0.348033
6PGD_MOUSE|Q9DCD0_S57	WT_Late-Wt_Uninfected	-0.474344	0.288689	8.44283	0.137002	0.237785	0.863272	0.474344	0.623815
6PGD_MOUSE|Q9DCD0_S57	Infected-Uninfected	-0.112982	0.166674	8.44283	0.516004	0.59666	0.287347	0.112982	0.224273
6PGD_MOUSE|Q9DCD0_S57	KO-WT	0.938822	0.146993	8.44283	0.000168168	0.0016994	3.77426	0.938822	2.7697
6PGD_MOUSE|Q9DCD0_S57	Early-Uninfected	-0.0660168	0.186348	8.44283	0.731825	0.790253	0.135593	0.0660168	0.102234
6PGD_MOUSE|Q9DCD0_S57	Late-Uninfected	-0.159947	0.186348	8.44283	0.414414	0.515304	0.382566	0.159947	0.287937
A0A024QYR9_MOUSE|A0A024QYR9_S20	KO_Early-WT_Early	0.0164765	0.170108	8.44283	0.925098	0.959538	0.033812	0.0164765	0.0179378
A0A024QYR9_MOUSE|A0A024QYR9_S20	KO_Late-WT_Late	0.256435	0.170108	8.44283	0.168155	0.344956	0.77429	0.256435	0.462236
A0A024QYR9_MOUSE|A0A024QYR9_S20	KO_Uninfected-WT_Uninfected	0.0254939	0.208339	8.44283	0.905471	0.958898	0.0431255	0.0254939	0.0182276
A0A024QYR9_MOUSE|A0A024QYR9_S20	KO_Early-KO_Uninfected	-0.484869	0.170108	8.44283	0.0203271	0.0536296	1.69193	0.484869	1.2706
A0A024QYR9_MOUSE|A0A024QYR9_S20	KO_Late-KO_Uninfected	-0.588032	0.170108	8.44283	0.00792696	0.0297973	2.10089	0.588032	1.52582
A0A024QYR9_MOUSE|A0A024QYR9_S20	WT_Early-Wt_Uninfected	-0.475852	0.208339	8.44283	0.050087	0.104796	1.30028	0.475852	0.979653
A0A024QYR9_MOUSE|A0A024QYR9_S20	WT_Late-Wt_Uninfected	-0.818974	0.208339	8.44283	0.00391294	0.0160948	2.4075	0.818974	1.79331
A0A024QYR9_MOUSE|A0A024QYR9_S20	Infected-Uninfected	-0.591932	0.120284	8.44283	0.00099309	0.00316317	3.00301	0.591932	2.49988
A0A024QYR9_MOUSE|A0A024QYR9_S20	KO-WT	0.0994686	0.106081	8.44283	0.374461	0.502009	0.426593	0.0994686	0.299288
A0A024QYR9_MOUSE|A0A024QYR9_S20	Early-Uninfected	-0.480361	0.134482	8.44283	0.00666021	0.0163512	2.17651	0.480361	1.78645
A0A024QYR9_MOUSE|A0A024QYR9_S20	Late-Uninfected	-0.703503	0.134482	8.44283	0.000665582	0.00281402	3.1768	0.703503	2.55067
A0A087WNM1_MOUSE|A0A087WNM1_S841	KO_Early-WT_Early	0.246759	0.14963	19.4428	0.115186	0.278888	0.938601	0.246759	0.55457
A0A087WNM1_MOUSE|A0A087WNM1_S841	KO_Late-WT_Late	0.134171	0.14963	19.4428	0.380854	0.573842	0.419241	0.134171	0.241207
A0A087WNM1_MOUSE|A0A087WNM1_S841	KO_Uninfected-WT_Uninfected	-0.112907	0.172778	19.4428	0.5211	0.743702	0.283079	0.112907	0.128601
A0A087WNM1_MOUSE|A0A087WNM1_S841	KO_Early-KO_Uninfected	1.65064	0.161619	19.4428	2.96062e-09	1.6619e-07	8.52862	1.65064	6.77939
A0A087WNM1_MOUSE|A0A087WNM1_S841	KO_Late-KO_Uninfected	1.06919	0.161619	19.4428	2.21686e-06	5.32131e-05	5.65426	1.06919	4.27398
A0A087WNM1_MOUSE|A0A087WNM1_S841	WT_Early-Wt_Uninfected	1.29098	0.161619	19.4428	1.45741e-07	4.00668e-06	6.83642	1.29098	5.39722
A0A087WNM1_MOUSE|A0A087WNM1_S841	WT_Late-Wt_Uninfected	0.822108	0.161619	19.4428	6.12107e-05	0.000727449	4.21317	0.822108	3.1382
A0A087WNM1_MOUSE|A0A087WNM1_S841	Infected-Uninfected	1.20823	0.1013	19.4428	2.15672e-10	7.71248e-09	9.66621	1.20823	8.11281
A0A087WNM1_MOUSE|A0A087WNM1_S841	KO-WT	0.089341	0.0910619	19.4428	0.338594	0.466781	0.470321	0.089341	0.330887
A0A087WNM1_MOUSE|A0A087WNM1_S841	Early-Uninfected	1.47081	0.114282	19.4428	5.75883e-11	2.52937e-09	10.2397	1.47081	8.59699
A0A087WNM1_MOUSE|A0A087WNM1_S841	Late-Uninfected	0.945647	0.114282	19.4428	8.51644e-08	1.81044e-06	7.06974	0.945647	5.74222
A0A087WP63_MOUSE|A0A087WP63_S1683	KO_Early-WT_Early	-0.131328	0.113775	19.4428	0.262376	0.460753	0.581075	0.131328	0.336532
A0A087WP63_MOUSE|A0A087WP63_S1683	KO_Late-WT_Late	-0.0432122	0.113775	19.4428	0.708207	0.827363	0.14984	0.0432122	0.082304
A0A087WP63_MOUSE|A0A087WP63_S1683	KO_Uninfected-WT_Uninfected	-0.119199	0.131376	19.4428	0.375348	0.63181	0.425566	0.119199	0.199413
A0A087WP63_MOUSE|A0A087WP63_S1683	KO_Early-KO_Uninfected	0.2251	0.122891	19.4428	0.0823613	0.161405	1.08428	0.2251	0.792082
A0A087WP63_MOUSE|A0A087WP63_S1683	KO_Late-KO_Uninfected	0.0476588	0.122891	19.4428	0.702366	0.805169	0.153436	0.0476588	0.094113
A0A087WP63_MOUSE|A0A087WP63_S1683	WT_Early-Wt_Uninfected	0.237228	0.122891	19.4428	0.0682741	0.133694	1.16574	0.237228	0.873887
A0A087WP63_MOUSE|A0A087WP63_S1683	WT_Late-Wt_Uninfected	-0.0283284	0.122891	19.4428	0.820098	0.877794	0.0861341	0.0283284	0.0566074
A0A087WP63_MOUSE|A0A087WP63_S1683	Infected-Uninfected	0.120415	0.0770259	19.4428	0.134112	0.197414	0.872531	0.120415	0.704623
A0A087WP63_MOUSE|A0A087WP63_S1683	KO-WT	-0.0979132	0.0692411	19.4428	0.173149	0.28315	0.76158	0.0979132	0.547984
A0A087WP63_MOUSE|A0A087WP63_S1683	Early-Uninfected	0.231164	0.0868969	19.4428	0.0152619	0.032934	1.81639	0.231164	1.48235
A0A087WP63_MOUSE|A0A087WP63_S1683	Late-Uninfected	0.00966523	0.0868969	19.4428	0.912577	0.937224	0.0397305	0.00966523	0.0281565
A0A087WP63_MOUSE|A0A087WP63_S2580	KO_Early-WT_Early	0.520302	0.740328	8.44283	0.501097	0.68268	0.300078	0.520302	0.165783
A0A087WP63_MOUSE|A0A087WP63_S2580	KO_Late-WT_Late	0.235983	0.740328	8.44283	0.757656	0.858493	0.120528	0.235983	0.0662632
A0A087WP63_MOUSE|A0A087WP63_S2580	KO_Uninfected-WT_Uninfected	-0.284517	0.906713	8.44283	0.761294	0.88742	0.118447	0.284517	0.051871
A0A087WP63_MOUSE|A0A087WP63_S2580	KO_Early-KO_Uninfected	0.305233	0.740328	8.44283	0.690395	0.786709	0.160902	0.305233	0.104186
A0A087WP63_MOUSE|A0A087WP63_S2580	KO_Late-KO_Uninfected	1.17614	0.740328	8.44283	0.148816	0.27015	0.827349	1.17614	0.568394
A0A087WP63_MOUSE|A0A087WP63_S2580	WT_Early-Wt_Uninfected	-0.499586	0.906713	8.44283	0.595919	0.696534	0.224812	0.499586	0.157058
A0A087WP63_MOUSE|A0A087WP63_S2580	WT_Late-Wt_Uninfected	0.655643	0.906713	8.44283	0.489165	0.61031	0.310544	0.655643	0.214449
A0A087WP63_MOUSE|A0A087WP63_S2580	Infected-Uninfected	0.409358	0.523491	8.44283	0.455597	0.539479	0.341419	0.409358	0.268025
A0A087WP63_MOUSE|A0A087WP63_S2580	KO-WT	0.157256	0.461675	8.44283	0.741711	0.821362	0.129765	0.157256	0.0854656
A0A087WP63_MOUSE|A0A087WP63_S2580	Early-Uninfected	-0.0971766	0.585281	8.44283	0.872038	0.903466	0.0594648	0.0971766	0.0440882
A0A087WP63_MOUSE|A0A087WP63_S2580	Late-Uninfected	0.915893	0.585281	8.44283	0.154267	0.23497	0.811726	0.915893	0.628987
A0A087WP63_MOUSE|A0A087WP63_S2595	KO_Early-WT_Early	-0.1253	0.201863	8.44283	0.55117	0.721894	0.258715	0.1253	0.141526
A0A087WP63_MOUSE|A0A087WP63_S2595	KO_Late-WT_Late	-0.0224409	0.201863	8.44283	0.91408	0.952764	0.0390158	0.0224409	0.0210145
A0A087WP63_MOUSE|A0A087WP63_S2595	KO_Uninfected-WT_Uninfected	0.0271144	0.24723	8.44283	0.915231	0.962954	0.0384691	0.0271144	0.0163944
A0A087WP63_MOUSE|A0A087WP63_S2595	KO_Early-KO_Uninfected	1.89071	0.201863	8.44283	9.58813e-06	0.000112452	5.01827	1.89071	3.94903
A0A087WP63_MOUSE|A0A087WP63_S2595	KO_Late-KO_Uninfected	1.59626	0.201863	8.44283	3.50538e-05	0.000459675	4.45527	1.59626	3.33755
A0A087WP63_MOUSE|A0A087WP63_S2595	WT_Early-Wt_Uninfected	2.04312	0.24723	8.44283	2.51101e-05	0.000249714	4.60015	2.04312	3.60256
A0A087WP63_MOUSE|A0A087WP63_S2595	WT_Late-Wt_Uninfected	1.64581	0.24723	8.44283	0.000124929	0.00122418	3.90334	1.64581	2.91215
A0A087WP63_MOUSE|A0A087WP63_S2595	Infected-Uninfected	1.79398	0.142739	8.44283	9.32409e-07	9.33928e-06	6.03039	1.79398	5.02969
A0A087WP63_MOUSE|A0A087WP63_S2595	KO-WT	-0.0402089	0.125884	8.44283	0.757174	0.832561	0.120804	0.0402089	0.0795839
A0A087WP63_MOUSE|A0A087WP63_S2595	Early-Uninfected	1.96692	0.159587	8.44283	1.09119e-06	1.07797e-05	5.9621	1.96692	4.96739
A0A087WP63_MOUSE|A0A087WP63_S2595	Late-Uninfected	1.62104	0.159587	8.44283	5.08487e-06	5.33478e-05	5.29372	1.62104	4.27288
A0A087WP63_MOUSE|A0A087WP63_S2654	KO_Early-WT_Early	0.00777286	0.171632	8.44283	0.964931	0.981476	0.0155038	0.00777286	0.0081205
A0A087WP63_MOUSE|A0A087WP63_S2654	KO_Late-WT_Late	-0.01659	0.171632	8.44283	0.925252	0.958793	0.0337402	0.01659	0.018275
A0A087WP63_MOUSE|A0A087WP63_S2654	KO_Uninfected-WT_Uninfected	-0.273481	0.210206	8.44283	0.227635	0.485371	0.642761	0.273481	0.313926
A0A087WP63_MOUSE|A0A087WP63_S2654	KO_Early-KO_Uninfected	-0.439814	0.171632	8.44283	0.0321107	0.0772175	1.49335	0.439814	1.11228
A0A087WP63_MOUSE|A0A087WP63_S2654	KO_Late-KO_Uninfected	-0.0364072	0.171632	8.44283	0.837043	0.896288	0.0772523	0.0364072	0.0475524
A0A087WP63_MOUSE|A0A087WP63_S2654	WT_Early-Wt_Uninfected	-0.721068	0.210206	8.44283	0.00825338	0.0253236	2.08337	0.721068	1.59648
A0A087WP63_MOUSE|A0A087WP63_S2654	WT_Late-Wt_Uninfected	-0.293298	0.210206	8.44283	0.198536	0.313662	0.70216	0.293298	0.503539
A0A087WP63_MOUSE|A0A087WP63_S2654	Infected-Uninfected	-0.372647	0.121362	8.44283	0.014381	0.0302031	1.84221	0.372647	1.51995
A0A087WP63_MOUSE|A0A087WP63_S2654	KO-WT	-0.0940995	0.107032	8.44283	0.403634	0.530624	0.394012	0.0940995	0.275213
A0A087WP63_MOUSE|A0A087WP63_S2654	Early-Uninfected	-0.580441	0.135687	8.44283	0.00238146	0.0068868	2.62316	0.580441	2.16198
A0A087WP63_MOUSE|A0A087WP63_S2654	Late-Uninfected	-0.164853	0.135687	8.44283	0.257269	0.354061	0.589612	0.164853	0.450922
A0A087WP63_MOUSE|A0A087WP63_S2826	KO_Early-WT_Early	0.361605	0.129799	19.4428	0.0116096	0.0671548	1.93518	0.361605	1.17292
A0A087WP63_MOUSE|A0A087WP63_S2826	KO_Late-WT_Late	0.153096	0.129799	19.4428	0.252435	0.444307	0.59785	0.153096	0.352317
A0A087WP63_MOUSE|A0A087WP63_S2826	KO_Uninfected-WT_Uninfected	-0.110537	0.149879	19.4428	0.469622	0.705825	0.328252	0.110537	0.151303
A0A087WP63_MOUSE|A0A087WP63_S2826	KO_Early-KO_Uninfected	0.157074	0.140199	19.4428	0.276206	0.408059	0.558767	0.157074	0.389277
A0A087WP63_MOUSE|A0A087WP63_S2826	KO_Late-KO_Uninfected	-0.0121375	0.140199	19.4428	0.931896	0.958204	0.0306326	0.0121375	0.0185419
A0A087WP63_MOUSE|A0A087WP63_S2826	WT_Early-Wt_Uninfected	-0.315068	0.140199	19.4428	0.0364073	0.0817373	1.43881	0.315068	1.08758
A0A087WP63_MOUSE|A0A087WP63_S2826	WT_Late-Wt_Uninfected	-0.275771	0.140199	19.4428	0.0636194	0.133254	1.19641	0.275771	0.87532
A0A087WP63_MOUSE|A0A087WP63_S2826	Infected-Uninfected	-0.111475	0.0878743	19.4428	0.21957	0.29699	0.658426	0.111475	0.527258
A0A087WP63_MOUSE|A0A087WP63_S2826	KO-WT	0.134722	0.0789931	19.4428	0.10403	0.192634	0.982843	0.134722	0.715268
A0A087WP63_MOUSE|A0A087WP63_S2826	Early-Uninfected	-0.0789967	0.0991356	19.4428	0.435159	0.525723	0.361352	0.0789967	0.279243
A0A087WP63_MOUSE|A0A087WP63_S2826	Late-Uninfected	-0.143954	0.0991356	19.4428	0.162423	0.244716	0.789353	0.143954	0.611337
A0A087WP63_MOUSE|A0A087WP63_S560	KO_Early-WT_Early	-0.168748	0.095226	19.4428	0.0920529	0.242668	1.03596	0.168748	0.614987
A0A087WP63_MOUSE|A0A087WP63_S560	KO_Late-WT_Late	0.166336	0.095226	19.4428	0.0964596	0.241072	1.01565	0.166336	0.617852
A0A087WP63_MOUSE|A0A087WP63_S560	KO_Uninfected-WT_Uninfected	-0.206253	0.109958	19.4428	0.075787	0.268493	1.12041	0.206253	0.571067
A0A087WP63_MOUSE|A0A087WP63_S560	KO_Early-KO_Uninfected	-0.52663	0.102856	19.4428	5.67774e-05	0.000474791	4.24582	0.52663	3.3235
A0A087WP63_MOUSE|A0A087WP63_S560	KO_Late-KO_Uninfected	-0.185825	0.102856	19.4428	0.0863187	0.180783	1.06389	0.185825	0.742844
A0A087WP63_MOUSE|A0A087WP63_S560	WT_Early-Wt_Uninfected	-0.564135	0.102856	19.4428	2.51432e-05	0.000249846	4.59958	0.564135	3.60233
A0A087WP63_MOUSE|A0A087WP63_S560	WT_Late-Wt_Uninfected	-0.558414	0.102856	19.4428	2.84442e-05	0.000401499	4.54601	0.558414	3.39632
A0A087WP63_MOUSE|A0A087WP63_S560	Infected-Uninfected	-0.458751	0.0644683	19.4428	7.97793e-07	8.2431e-06	6.09811	0.458751	5.08391
A0A087WP63_MOUSE|A0A087WP63_S560	KO-WT	-0.0695548	0.0579527	19.4428	0.244482	0.367116	0.611753	0.0695548	0.435197
A0A087WP63_MOUSE|A0A087WP63_S560	Early-Uninfected	-0.545382	0.0727301	19.4428	3.73477e-07	4.38553e-06	6.42774	0.545382	5.35798
A0A087WP63_MOUSE|A0A087WP63_S560	Late-Uninfected	-0.37212	0.0727301	19.4428	5.72432e-05	0.000382699	4.24228	0.37212	3.41714
A0A087WP63_MOUSE|A0A087WP63_T564	KO_Early-WT_Early	0.239906	0.176959	19.4428	0.190729	0.377653	0.719584	0.239906	0.422907
A0A087WP63_MOUSE|A0A087WP63_T564	KO_Late-WT_Late	0.157282	0.176959	19.4428	0.384973	0.577627	0.414569	0.157282	0.238353
A0A087WP63_MOUSE|A0A087WP63_T564	KO_Uninfected-WT_Uninfected	-0.398081	0.204335	19.4428	0.0659759	0.247587	1.18061	0.398081	0.606273
A0A087WP63_MOUSE|A0A087WP63_T564	KO_Early-KO_Uninfected	0.56963	0.191137	19.4428	0.00755695	0.0242193	2.12165	0.56963	1.61584
A0A087WP63_MOUSE|A0A087WP63_T564	KO_Late-KO_Uninfected	0.317103	0.191137	19.4428	0.113155	0.221081	0.946328	0.317103	0.655448
A0A087WP63_MOUSE|A0A087WP63_T564	WT_Early-Wt_Uninfected	-0.0683568	0.191137	19.4428	0.724472	0.801788	0.139978	0.0683568	0.0959402
A0A087WP63_MOUSE|A0A087WP63_T564	WT_Late-Wt_Uninfected	-0.23826	0.191137	19.4428	0.227378	0.347027	0.643252	0.23826	0.459637
A0A087WP63_MOUSE|A0A087WP63_T564	Infected-Uninfected	0.145029	0.119802	19.4428	0.240569	0.320356	0.618761	0.145029	0.494367
A0A087WP63_MOUSE|A0A087WP63_T564	KO-WT	-0.000297732	0.107694	19.4428	0.997822	0.998654	0.000946783	0.000297732	0.000584907
A0A087WP63_MOUSE|A0A087WP63_T564	Early-Uninfected	0.250637	0.135155	19.4428	0.0789072	0.129979	1.10288	0.250637	0.886127
A0A087WP63_MOUSE|A0A087WP63_T564	Late-Uninfected	0.0394217	0.135155	19.4428	0.773622	0.830938	0.111471	0.0394217	0.0804314
A0A087WQM0_MOUSE|A0A087WQM0_S1010	KO_Early-WT_Early	-0.0793378	0.18334	19.4428	0.669968	0.808696	0.173946	0.0793378	0.0922146
A0A087WQM0_MOUSE|A0A087WQM0_S1010	KO_Late-WT_Late	-0.204678	0.18334	19.4428	0.277865	0.470675	0.556167	0.204678	0.327279
A0A087WQM0_MOUSE|A0A087WQM0_S1010	KO_Uninfected-WT_Uninfected	-0.00845365	0.211702	19.4428	0.968555	0.988234	0.0138758	0.00845365	0.0051404
A0A087WQM0_MOUSE|A0A087WQM0_S1010	KO_Early-KO_Uninfected	-0.333333	0.19803	19.4428	0.108316	0.199139	0.965308	0.333333	0.700844
A0A087WQM0_MOUSE|A0A087WQM0_S1010	KO_Late-KO_Uninfected	-0.350071	0.19803	19.4428	0.0927897	0.190803	1.0325	0.350071	0.719415
A0A087WQM0_MOUSE|A0A087WQM0_S1010	WT_Early-Wt_Uninfected	-0.262449	0.19803	19.4428	0.200435	0.307826	0.698026	0.262449	0.511694
A0A087WQM0_MOUSE|A0A087WQM0_S1010	WT_Late-Wt_Uninfected	-0.153847	0.19803	19.4428	0.446574	0.571391	0.350107	0.153847	0.243067
A0A087WQM0_MOUSE|A0A087WQM0_S1010	Infected-Uninfected	-0.274925	0.124122	19.4428	0.038885	0.0699137	1.41022	0.274925	1.15544
A0A087WQM0_MOUSE|A0A087WQM0_S1010	KO-WT	-0.0974898	0.111577	19.4428	0.392922	0.520012	0.405694	0.0974898	0.283987
A0A087WQM0_MOUSE|A0A087WQM0_S1010	Early-Uninfected	-0.297891	0.140028	19.4428	0.046394	0.0831714	1.33354	0.297891	1.08003
A0A087WQM0_MOUSE|A0A087WQM0_S1010	Late-Uninfected	-0.251959	0.140028	19.4428	0.0875042	0.149089	1.05797	0.251959	0.826555
A0A087WQM0_MOUSE|A0A087WQM0_S1074	KO_Early-WT_Early	0.50096	0.204252	19.4428	0.0237731	0.104016	1.62391	0.50096	0.982898
A0A087WQM0_MOUSE|A0A087WQM0_S1074	KO_Late-WT_Late	0.475524	0.204252	19.4428	0.0308336	0.117269	1.51098	0.475524	0.930816
A0A087WQM0_MOUSE|A0A087WQM0_S1074	KO_Uninfected-WT_Uninfected	0.418225	0.23585	19.4428	0.0918513	0.297745	1.03691	0.418225	0.526155
A0A087WQM0_MOUSE|A0A087WQM0_S1074	KO_Early-KO_Uninfected	0.216567	0.220618	19.4428	0.338335	0.47472	0.470653	0.216567	0.323562
A0A087WQM0_MOUSE|A0A087WQM0_S1074	KO_Late-KO_Uninfected	0.218727	0.220618	19.4428	0.333655	0.485254	0.476702	0.218727	0.314031
A0A087WQM0_MOUSE|A0A087WQM0_S1074	WT_Early-Wt_Uninfected	0.133832	0.220618	19.4428	0.551118	0.657316	0.258755	0.133832	0.182226
A0A087WQM0_MOUSE|A0A087WQM0_S1074	WT_Late-Wt_Uninfected	0.161427	0.220618	19.4428	0.473076	0.595597	0.325069	0.161427	0.225047
A0A087WQM0_MOUSE|A0A087WQM0_S1074	Infected-Uninfected	0.182638	0.138279	19.4428	0.201907	0.277233	0.694849	0.182638	0.557155
A0A087WQM0_MOUSE|A0A087WQM0_S1074	KO-WT	0.464903	0.124304	19.4428	0.00134281	0.00760302	2.87199	0.464903	2.11901
A0A087WQM0_MOUSE|A0A087WQM0_S1074	Early-Uninfected	0.1752	0.156	19.4428	0.275083	0.362963	0.560536	0.1752	0.440138
A0A087WQM0_MOUSE|A0A087WQM0_S1074	Late-Uninfected	0.190077	0.156	19.4428	0.237636	0.332171	0.624089	0.190077	0.478639
A0A087WQM0_MOUSE|A0A087WQM0_S592	KO_Early-WT_Early	0.309505	0.206953	19.4428	0.150831	0.328701	0.821511	0.309505	0.483199
A0A087WQM0_MOUSE|A0A087WQM0_S592	KO_Late-WT_Late	0.142603	0.206953	19.4428	0.498927	0.67648	0.301963	0.142603	0.169745
A0A087WQM0_MOUSE|A0A087WQM0_S592	KO_Uninfected-WT_Uninfected	0.352499	0.238969	19.4428	0.1562	0.396285	0.80632	0.352499	0.401992
A0A087WQM0_MOUSE|A0A087WQM0_S592	KO_Early-KO_Uninfected	1.42939	0.223535	19.4428	3.5185e-06	5.1142e-05	5.45364	1.42939	4.29122
A0A087WQM0_MOUSE|A0A087WQM0_S592	KO_Late-KO_Uninfected	1.04272	0.223535	19.4428	0.000159677	0.00148451	3.79676	1.04272	2.82842
A0A087WQM0_MOUSE|A0A087WQM0_S592	WT_Early-Wt_Uninfected	1.47238	0.223535	19.4428	2.35286e-06	3.73994e-05	5.6284	1.47238	4.42714
A0A087WQM0_MOUSE|A0A087WQM0_S592	WT_Late-Wt_Uninfected	1.25261	0.223535	19.4428	1.9334e-05	0.000301242	4.71368	1.25261	3.52108
A0A087WQM0_MOUSE|A0A087WQM0_S592	Infected-Uninfected	1.29928	0.140108	19.4428	1.42527e-08	2.72629e-07	7.8461	1.29928	6.56443
A0A087WQM0_MOUSE|A0A087WQM0_S592	KO-WT	0.268202	0.125947	19.4428	0.0461985	0.104308	1.33537	0.268202	0.981684
A0A087WQM0_MOUSE|A0A087WQM0_S592	Early-Uninfected	1.45089	0.158063	19.4428	1.67818e-08	3.17155e-07	7.77516	1.45089	6.49873
A0A087WQM0_MOUSE|A0A087WQM0_S592	Late-Uninfected	1.14767	0.158063	19.4428	5.97182e-07	9.18582e-06	6.22389	1.14767	5.03688
A0A087WQM0_MOUSE|A0A087WQM0_S746	KO_Early-WT_Early	0.472031	0.273131	19.4428	0.0997987	0.254746	1.00088	0.472031	0.593893
A0A087WQM0_MOUSE|A0A087WQM0_S746	KO_Late-WT_Late	0.124645	0.273131	19.4428	0.653192	0.790376	0.184959	0.124645	0.102166
A0A087WQM0_MOUSE|A0A087WQM0_S746	KO_Uninfected-WT_Uninfected	0.48175	0.315385	19.4428	0.142742	0.376508	0.845447	0.48175	0.424225
A0A087WQM0_MOUSE|A0A087WQM0_S746	KO_Early-KO_Uninfected	1.95824	0.295016	19.4428	2.11679e-06	3.39819e-05	5.67432	1.95824	4.46875
A0A087WQM0_MOUSE|A0A087WQM0_S746	KO_Late-KO_Uninfected	1.37356	0.295016	19.4428	0.000162921	0.00150824	3.78802	1.37356	2.82153
A0A087WQM0_MOUSE|A0A087WQM0_S746	WT_Early-Wt_Uninfected	1.96796	0.295016	19.4428	1.97721e-06	3.23253e-05	5.70395	1.96796	4.49046
A0A087WQM0_MOUSE|A0A087WQM0_S746	WT_Late-Wt_Uninfected	1.73067	0.295016	19.4428	1.08856e-05	0.000194106	4.96315	1.73067	3.71196
A0A087WQM0_MOUSE|A0A087WQM0_S746	Infected-Uninfected	1.75761	0.184911	19.4428	9.58104e-09	1.9464e-07	8.01859	1.75761	6.71077
A0A087WQM0_MOUSE|A0A087WQM0_S746	KO-WT	0.359475	0.166222	19.4428	0.0432267	0.0990885	1.36425	0.359475	1.00398
A0A087WQM0_MOUSE|A0A087WQM0_S746	Early-Uninfected	1.9631	0.208608	19.4428	1.12597e-08	2.23168e-07	7.94847	1.9631	6.65137
A0A087WQM0_MOUSE|A0A087WQM0_S746	Late-Uninfected	1.55211	0.208608	19.4428	4.18767e-07	6.84222e-06	6.37803	1.55211	5.1648
A0A087WQM0_MOUSE|A0A087WQM0_S748	KO_Early-WT_Early	0.329141	0.247292	19.4428	0.198594	0.387025	0.702035	0.329141	0.412261
A0A087WQM0_MOUSE|A0A087WQM0_S748	KO_Late-WT_Late	0.202842	0.247292	19.4428	0.422014	0.610326	0.374674	0.202842	0.214438
A0A087WQM0_MOUSE|A0A087WQM0_S748	KO_Uninfected-WT_Uninfected	0.298741	0.285548	19.4428	0.308301	0.570719	0.511025	0.298741	0.243578
A0A087WQM0_MOUSE|A0A087WQM0_S748	KO_Early-KO_Uninfected	1.29867	0.267106	19.4428	0.000101815	0.000760116	3.99219	1.29867	3.11912
A0A087WQM0_MOUSE|A0A087WQM0_S748	KO_Late-KO_Uninfected	0.91654	0.267106	19.4428	0.00272703	0.013099	2.56431	0.91654	1.88276
A0A087WQM0_MOUSE|A0A087WQM0_S748	WT_Early-Wt_Uninfected	1.26827	0.267106	19.4428	0.000131945	0.00094009	3.87961	1.26827	3.02683
A0A087WQM0_MOUSE|A0A087WQM0_S748	WT_Late-Wt_Uninfected	1.01244	0.267106	19.4428	0.0011957	0.00659452	2.92238	1.01244	2.18082
A0A087WQM0_MOUSE|A0A087WQM0_S748	Infected-Uninfected	1.12398	0.167417	19.4428	1.80943e-06	1.61879e-05	5.74246	1.12398	4.79081
A0A087WQM0_MOUSE|A0A087WQM0_S748	KO-WT	0.276908	0.150497	19.4428	0.0810931	0.15966	1.09102	0.276908	0.796805
A0A087WQM0_MOUSE|A0A087WQM0_S748	Early-Uninfected	1.28347	0.188872	19.4428	1.5292e-06	1.42788e-05	5.81553	1.28347	4.84531
A0A087WQM0_MOUSE|A0A087WQM0_S748	Late-Uninfected	0.964489	0.188872	19.4428	5.85317e-05	0.000389578	4.23261	0.964489	3.40941
A0A087WQM0_MOUSE|A0A087WQM0_S792	KO_Early-WT_Early	0.0886749	0.185687	19.4428	0.638295	0.785815	0.194978	0.0886749	0.10468
A0A087WQM0_MOUSE|A0A087WQM0_S792	KO_Late-WT_Late	-0.137855	0.185687	19.4428	0.466718	0.649352	0.330945	0.137855	0.18752
A0A087WQM0_MOUSE|A0A087WQM0_S792	KO_Uninfected-WT_Uninfected	0.0599166	0.214413	19.4428	0.782855	0.898649	0.106319	0.0599166	0.0464101
A0A087WQM0_MOUSE|A0A087WQM0_S792	KO_Early-KO_Uninfected	-0.236266	0.200565	19.4428	0.253015	0.382244	0.596854	0.236266	0.417659
A0A087WQM0_MOUSE|A0A087WQM0_S792	KO_Late-KO_Uninfected	-0.406066	0.200565	19.4428	0.0568631	0.132078	1.24517	0.406066	0.87917
A0A087WQM0_MOUSE|A0A087WQM0_S792	WT_Early-Wt_Uninfected	-0.265024	0.200565	19.4428	0.201712	0.309317	0.695268	0.265024	0.509597
A0A087WQM0_MOUSE|A0A087WQM0_S792	WT_Late-Wt_Uninfected	-0.208295	0.200565	19.4428	0.311762	0.43754	0.506176	0.208295	0.358982
A0A087WQM0_MOUSE|A0A087WQM0_S792	Infected-Uninfected	-0.278913	0.125711	19.4428	0.0385923	0.0694915	1.4135	0.278913	1.15807
A0A087WQM0_MOUSE|A0A087WQM0_S792	KO-WT	0.00357892	0.113006	19.4428	0.975058	0.984823	0.0109696	0.00357892	0.00664187
A0A087WQM0_MOUSE|A0A087WQM0_S792	Early-Uninfected	-0.250645	0.141821	19.4428	0.0928653	0.149018	1.03215	0.250645	0.82676
A0A087WQM0_MOUSE|A0A087WQM0_S792	Late-Uninfected	-0.307181	0.141821	19.4428	0.0429353	0.0833095	1.36719	0.307181	1.07931
A0A087WQM0_MOUSE|A0A087WQM0_S792_S796	KO_Early-WT_Early	0.74572	0.223854	8.44283	0.00960237	0.0599597	2.01762	0.74572	1.22214
A0A087WQM0_MOUSE|A0A087WQM0_S792_S796	KO_Late-WT_Late	0.132944	0.223854	8.44283	0.568154	0.728987	0.245534	0.132944	0.13728
A0A087WQM0_MOUSE|A0A087WQM0_S792_S796	KO_Uninfected-WT_Uninfected	0.445292	0.274163	8.44283	0.141008	0.374166	0.850755	0.445292	0.426935
A0A087WQM0_MOUSE|A0A087WQM0_S792_S796	KO_Early-KO_Uninfected	0.0979432	0.223854	8.44283	0.672703	0.772464	0.172177	0.0979432	0.112122
A0A087WQM0_MOUSE|A0A087WQM0_S792_S796	KO_Late-KO_Uninfected	-0.409149	0.223854	8.44283	0.103043	0.206332	0.986981	0.409149	0.685434
A0A087WQM0_MOUSE|A0A087WQM0_S792_S796	WT_Early-Wt_Uninfected	-0.202485	0.274163	8.44283	0.480202	0.594388	0.318576	0.202485	0.22593
A0A087WQM0_MOUSE|A0A087WQM0_S792_S796	WT_Late-Wt_Uninfected	-0.0968019	0.274163	8.44283	0.732682	0.812109	0.135085	0.0968019	0.0903857
A0A087WQM0_MOUSE|A0A087WQM0_S792_S796	Infected-Uninfected	-0.152623	0.158288	8.44283	0.361743	0.447844	0.4416	0.152623	0.348873
A0A087WQM0_MOUSE|A0A087WQM0_S792_S796	KO-WT	0.441319	0.139597	8.44283	0.0124833	0.0397	1.90367	0.441319	1.40121
A0A087WQM0_MOUSE|A0A087WQM0_S792_S796	Early-Uninfected	-0.0522709	0.176972	8.44283	0.774851	0.826656	0.110782	0.0522709	0.0826752
A0A087WQM0_MOUSE|A0A087WQM0_S792_S796	Late-Uninfected	-0.252976	0.176972	8.44283	0.18881	0.276411	0.723976	0.252976	0.558444
A0A087WQM0_MOUSE|A0A087WQM0_S855	KO_Early-WT_Early	0.268985	0.326127	8.44283	0.432176	0.625526	0.364339	0.268985	0.203755
A0A087WQM0_MOUSE|A0A087WQM0_S855	KO_Late-WT_Late	0.0116768	0.326127	8.44283	0.97227	0.985244	0.012213	0.0116768	0.00645603
A0A087WQM0_MOUSE|A0A087WQM0_S855	KO_Uninfected-WT_Uninfected	0.0915544	0.399422	8.44283	0.824156	0.919681	0.0839907	0.0915544	0.0363626
A0A087WQM0_MOUSE|A0A087WQM0_S855	KO_Early-KO_Uninfected	1.91784	0.326127	8.44283	0.000300653	0.00181893	3.52193	1.91784	2.74018
A0A087WQM0_MOUSE|A0A087WQM0_S855	KO_Late-KO_Uninfected	1.00529	0.326127	8.44283	0.0141146	0.0461527	1.85033	1.00529	1.3358
A0A087WQM0_MOUSE|A0A087WQM0_S855	WT_Early-Wt_Uninfected	1.74041	0.399422	8.44283	0.00213036	0.00858753	2.67155	1.74041	2.06613
A0A087WQM0_MOUSE|A0A087WQM0_S855	WT_Late-Wt_Uninfected	1.08516	0.399422	8.44283	0.0251171	0.0653492	1.60003	1.08516	1.18476
A0A087WQM0_MOUSE|A0A087WQM0_S855	Infected-Uninfected	1.43718	0.230606	8.44283	0.000200158	0.000825347	3.69863	1.43718	3.08336
A0A087WQM0_MOUSE|A0A087WQM0_S855	KO-WT	0.124072	0.203376	8.44283	0.55788	0.671188	0.253459	0.124072	0.173156
A0A087WQM0_MOUSE|A0A087WQM0_S855	Early-Uninfected	1.82913	0.257826	8.44283	7.8598e-05	0.000386867	4.10459	1.82913	3.41244
A0A087WQM0_MOUSE|A0A087WQM0_S855	Late-Uninfected	1.04523	0.257826	8.44283	0.00327448	0.0102119	2.48486	1.04523	1.99089
A0A087WQM0_MOUSE|A0A087WQM0_S878	KO_Early-WT_Early	-0.193128	0.346735	8.44283	0.59199	0.753496	0.227686	0.193128	0.122919
A0A087WQM0_MOUSE|A0A087WQM0_S878	KO_Late-WT_Late	-0.280187	0.346735	8.44283	0.441221	0.625715	0.355344	0.280187	0.203623
A0A087WQM0_MOUSE|A0A087WQM0_S878	KO_Uninfected-WT_Uninfected	-0.275123	0.424662	8.44283	0.534291	0.752142	0.272222	0.275123	0.1237
A0A087WQM0_MOUSE|A0A087WQM0_S878	KO_Early-KO_Uninfected	0.356284	0.346735	8.44283	0.332704	0.468326	0.477942	0.356284	0.329452
A0A087WQM0_MOUSE|A0A087WQM0_S878	KO_Late-KO_Uninfected	0.593126	0.346735	8.44283	0.12354	0.236334	0.908193	0.593126	0.626474
A0A087WQM0_MOUSE|A0A087WQM0_S878	WT_Early-Wt_Uninfected	0.274288	0.424662	8.44283	0.535503	0.643451	0.271238	0.274288	0.191485
A0A087WQM0_MOUSE|A0A087WQM0_S878	WT_Late-Wt_Uninfected	0.59819	0.424662	8.44283	0.194691	0.309176	0.710654	0.59819	0.509794
A0A087WQM0_MOUSE|A0A087WQM0_S878	Infected-Uninfected	0.455472	0.245179	8.44283	0.0983387	0.152464	1.00728	0.455472	0.816833
A0A087WQM0_MOUSE|A0A087WQM0_S878	KO-WT	-0.249479	0.216227	8.44283	0.280203	0.406138	0.552527	0.249479	0.391327
A0A087WQM0_MOUSE|A0A087WQM0_S878	Early-Uninfected	0.315286	0.274118	8.44283	0.281603	0.370094	0.550362	0.315286	0.431688
A0A087WQM0_MOUSE|A0A087WQM0_S878	Late-Uninfected	0.595658	0.274118	8.44283	0.0597807	0.109562	1.22344	0.595658	0.960341
A0A087WQM0_MOUSE|A0A087WQM0_T971	KO_Early-WT_Early	0.54572	0.188996	19.4428	0.00928409	0.0588783	2.03226	0.54572	1.23004
A0A087WQM0_MOUSE|A0A087WQM0_T971	KO_Late-WT_Late	0.48589	0.188996	19.4428	0.0184942	0.0854023	1.73296	0.48589	1.06853
A0A087WQM0_MOUSE|A0A087WQM0_T971	KO_Uninfected-WT_Uninfected	0.493483	0.218234	19.4428	0.0353825	0.174016	1.45121	0.493483	0.759411
A0A087WQM0_MOUSE|A0A087WQM0_T971	KO_Early-KO_Uninfected	1.76849	0.204139	19.4428	4.18586e-08	1.4776e-06	7.37822	1.76849	5.83044
A0A087WQM0_MOUSE|A0A087WQM0_T971	KO_Late-KO_Uninfected	1.57227	0.204139	19.4428	2.51623e-07	9.84769e-06	6.59925	1.57227	5.00667
A0A087WQM0_MOUSE|A0A087WQM0_T971	WT_Early-Wt_Uninfected	1.71625	0.204139	19.4428	6.66872e-08	2.1609e-06	7.17596	1.71625	5.66536
A0A087WQM0_MOUSE|A0A087WQM0_T971	WT_Late-Wt_Uninfected	1.57986	0.204139	19.4428	2.34219e-07	9.79212e-06	6.63038	1.57986	5.00912
A0A087WQM0_MOUSE|A0A087WQM0_T971	Infected-Uninfected	1.65922	0.127951	19.4428	5.04563e-11	2.27967e-09	10.2971	1.65922	8.64213
A0A087WQM0_MOUSE|A0A087WQM0_T971	KO-WT	0.508365	0.11502	19.4428	0.000280027	0.00245491	3.5528	0.508365	2.60996
A0A087WQM0_MOUSE|A0A087WQM0_T971	Early-Uninfected	1.74237	0.144348	19.4428	1.75535e-10	6.54647e-09	9.75564	1.74237	8.18399
A0A087WQM0_MOUSE|A0A087WQM0_T971	Late-Uninfected	1.57607	0.144348	19.4428	9.71426e-10	4.46095e-08	9.01259	1.57607	7.35057
A0A087WS36_MOUSE|A0A087WS36_S274	KO_Early-WT_Early	-0.00740176	0.146261	19.4428	0.960155	0.979072	0.0176585	0.00740176	0.00918547
A0A087WS36_MOUSE|A0A087WS36_S274	KO_Late-WT_Late	0.167113	0.146261	19.4428	0.267093	0.459436	0.573337	0.167113	0.337775
A0A087WS36_MOUSE|A0A087WS36_S274	KO_Uninfected-WT_Uninfected	0.151585	0.168888	19.4428	0.380406	0.635689	0.419753	0.151585	0.196755
A0A087WS36_MOUSE|A0A087WS36_S274	KO_Early-KO_Uninfected	-0.0185506	0.15798	19.4428	0.907729	0.940646	0.0420438	0.0185506	0.0265736
A0A087WS36_MOUSE|A0A087WS36_S274	KO_Late-KO_Uninfected	0.213787	0.15798	19.4428	0.1915	0.326231	0.717831	0.213787	0.486475
A0A087WS36_MOUSE|A0A087WS36_S274	WT_Early-Wt_Uninfected	0.140436	0.15798	19.4428	0.384896	0.504221	0.414656	0.140436	0.297379
A0A087WS36_MOUSE|A0A087WS36_S274	WT_Late-Wt_Uninfected	0.198259	0.15798	19.4428	0.224367	0.343639	0.649041	0.198259	0.463898
A0A087WS36_MOUSE|A0A087WS36_S274	Infected-Uninfected	0.133483	0.0990192	19.4428	0.193139	0.267143	0.714131	0.133483	0.573256
A0A087WS36_MOUSE|A0A087WS36_S274	KO-WT	0.103766	0.0890116	19.4428	0.257817	0.381691	0.588689	0.103766	0.418288
A0A087WS36_MOUSE|A0A087WS36_S274	Early-Uninfected	0.0609429	0.111709	19.4428	0.591579	0.669222	0.227988	0.0609429	0.17443
A0A087WS36_MOUSE|A0A087WS36_S274	Late-Uninfected	0.206023	0.111709	19.4428	0.0804337	0.139426	1.09456	0.206023	0.855656
A0A087WS73_MOUSE|A0A087WS73_S254	KO_Early-WT_Early	0.284098	0.176299	8.44283	0.143764	0.319645	0.842349	0.284098	0.495333
A0A087WS73_MOUSE|A0A087WS73_S254	KO_Late-WT_Late	0.250124	0.176299	8.44283	0.191816	0.374948	0.717114	0.250124	0.426029
A0A087WS73_MOUSE|A0A087WS73_S254	KO_Uninfected-WT_Uninfected	0.245254	0.215922	8.44283	0.287234	0.549904	0.541765	0.245254	0.259713
A0A087WS73_MOUSE|A0A087WS73_S254	KO_Early-KO_Uninfected	-0.603239	0.176299	8.44283	0.00836254	0.0262608	2.07766	0.603239	1.58069
A0A087WS73_MOUSE|A0A087WS73_S254	KO_Late-KO_Uninfected	-0.647598	0.176299	8.44283	0.00572161	0.0231733	2.24248	0.647598	1.63501
A0A087WS73_MOUSE|A0A087WS73_S254	WT_Early-Wt_Uninfected	-0.642083	0.215922	8.44283	0.0167371	0.0445652	1.77632	0.642083	1.351
A0A087WS73_MOUSE|A0A087WS73_S254	WT_Late-Wt_Uninfected	-0.652468	0.215922	8.44283	0.0155208	0.0453499	1.80909	0.652468	1.34342
A0A087WS73_MOUSE|A0A087WS73_S254	Infected-Uninfected	-0.636347	0.124663	8.44283	0.000782449	0.00258808	3.10654	0.636347	2.58702
A0A087WS73_MOUSE|A0A087WS73_S254	KO-WT	0.259825	0.109942	8.44283	0.0441348	0.100694	1.35522	0.259825	0.996996
A0A087WS73_MOUSE|A0A087WS73_S254	Early-Uninfected	-0.622661	0.139377	8.44283	0.00182857	0.00550777	2.73789	0.622661	2.25902
A0A087WS73_MOUSE|A0A087WS73_S254	Late-Uninfected	-0.650033	0.139377	8.44283	0.00139872	0.0050929	2.85427	0.650033	2.29304
A0A087WS73_MOUSE|A0A087WS73_S256	KO_Early-WT_Early	0.0658218	0.169411	19.4428	0.701843	0.829804	0.15376	0.0658218	0.0810246
A0A087WS73_MOUSE|A0A087WS73_S256	KO_Late-WT_Late	0.106355	0.169411	19.4428	0.537444	0.705144	0.269667	0.106355	0.151722
A0A087WS73_MOUSE|A0A087WS73_S256	KO_Uninfected-WT_Uninfected	0.407706	0.195619	19.4428	0.0505608	0.212301	1.29619	0.407706	0.673047
A0A087WS73_MOUSE|A0A087WS73_S256	KO_Early-KO_Uninfected	-0.438991	0.182985	19.4428	0.0266037	0.0663618	1.57506	0.438991	1.17808
A0A087WS73_MOUSE|A0A087WS73_S256	KO_Late-KO_Uninfected	-0.29217	0.182985	19.4428	0.12646	0.240352	0.898045	0.29217	0.619152
A0A087WS73_MOUSE|A0A087WS73_S256	WT_Early-Wt_Uninfected	-0.0971073	0.182985	19.4428	0.601647	0.701421	0.220658	0.0971073	0.154021
A0A087WS73_MOUSE|A0A087WS73_S256	WT_Late-Wt_Uninfected	0.00918024	0.182985	19.4428	0.960499	0.974151	0.017503	0.00918024	0.0113735
A0A087WS73_MOUSE|A0A087WS73_S256	Infected-Uninfected	-0.204772	0.114692	19.4428	0.089804	0.141397	1.0467	0.204772	0.84956
A0A087WS73_MOUSE|A0A087WS73_S256	KO-WT	0.193294	0.1031	19.4428	0.0759211	0.152441	1.11964	0.193294	0.816899
A0A087WS73_MOUSE|A0A087WS73_S256	Early-Uninfected	-0.268049	0.12939	19.4428	0.0518327	0.0915415	1.2854	0.268049	1.03838
A0A087WS73_MOUSE|A0A087WS73_S256	Late-Uninfected	-0.141495	0.12939	19.4428	0.287514	0.386649	0.541341	0.141495	0.412683
A0A087WS73_MOUSE|A0A087WS73_S261	KO_Early-WT_Early	-0.513647	0.126533	8.44283	0.00324913	0.0305889	2.48823	0.513647	1.51444
A0A087WS73_MOUSE|A0A087WS73_S261	KO_Late-WT_Late	-0.255633	0.126533	8.44283	0.0761636	0.207452	1.11825	0.255633	0.683083
A0A087WS73_MOUSE|A0A087WS73_S261	KO_Uninfected-WT_Uninfected	0.143865	0.15497	8.44283	0.379006	0.634986	0.421354	0.143865	0.197236
A0A087WS73_MOUSE|A0A087WS73_S261	KO_Early-KO_Uninfected	-0.871033	0.126533	8.44283	9.79775e-05	0.000736702	4.00887	0.871033	3.13271
A0A087WS73_MOUSE|A0A087WS73_S261	KO_Late-KO_Uninfected	-0.362595	0.126533	8.44283	0.0198428	0.059923	1.7024	0.362595	1.22241
A0A087WS73_MOUSE|A0A087WS73_S261	WT_Early-Wt_Uninfected	-0.213521	0.15497	8.44283	0.203674	0.311397	0.691064	0.213521	0.506685
A0A087WS73_MOUSE|A0A087WS73_S261	WT_Late-Wt_Uninfected	0.0369033	0.15497	8.44283	0.817457	0.875878	0.0875349	0.0369033	0.0575565
A0A087WS73_MOUSE|A0A087WS73_S261	Infected-Uninfected	-0.352562	0.0894721	8.44283	0.00385924	0.00996266	2.4135	0.352562	2.00162
A0A087WS73_MOUSE|A0A087WS73_S261	KO-WT	-0.208472	0.078907	8.44283	0.028292	0.0723528	1.54834	0.208472	1.14054
A0A087WS73_MOUSE|A0A087WS73_S261	Early-Uninfected	-0.542277	0.100033	8.44283	0.000524511	0.00191388	3.28025	0.542277	2.71809
A0A087WS73_MOUSE|A0A087WS73_S261	Late-Uninfected	-0.162846	0.100033	8.44283	0.140207	0.218143	0.853229	0.162846	0.661259
A0A097PUG4_MOUSE|A0A097PUG4_S138	KO_Early-WT_Early	-0.637502	0.672572	19.4428	0.354835	0.554821	0.449973	0.637502	0.255847
A0A097PUG4_MOUSE|A0A097PUG4_S138	KO_Late-WT_Late	-1.20433	0.672572	19.4428	0.0889367	0.228534	1.05092	1.20433	0.641049
A0A097PUG4_MOUSE|A0A097PUG4_S138	KO_Uninfected-WT_Uninfected	-0.0973479	0.776619	19.4428	0.901535	0.957254	0.0450175	0.0973479	0.0189728
A0A097PUG4_MOUSE|A0A097PUG4_S138	KO_Early-KO_Uninfected	-0.4681	0.726461	19.4428	0.526874	0.650591	0.278293	0.4681	0.186692
A0A097PUG4_MOUSE|A0A097PUG4_S138	KO_Late-KO_Uninfected	-1.44254	0.726461	19.4428	0.0613498	0.139895	1.21219	1.44254	0.854198
A0A097PUG4_MOUSE|A0A097PUG4_S138	WT_Early-Wt_Uninfected	0.0720548	0.726461	19.4428	0.922006	0.946061	0.0352662	0.0720548	0.0240809
A0A097PUG4_MOUSE|A0A097PUG4_S138	WT_Late-Wt_Uninfected	-0.335563	0.726461	19.4428	0.649269	0.74546	0.187576	0.335563	0.127576
A0A097PUG4_MOUSE|A0A097PUG4_S138	Infected-Uninfected	-0.543538	0.455333	19.4428	0.246952	0.327231	0.607388	0.543538	0.485145
A0A097PUG4_MOUSE|A0A097PUG4_S138	KO-WT	-0.646393	0.409314	19.4428	0.13042	0.229068	0.884656	0.646393	0.640035
A0A097PUG4_MOUSE|A0A097PUG4_S138	Early-Uninfected	-0.198022	0.513685	19.4428	0.704057	0.766894	0.152392	0.198022	0.115264
A0A097PUG4_MOUSE|A0A097PUG4_S138	Late-Uninfected	-0.889053	0.513685	19.4428	0.0993396	0.165125	1.00288	0.889053	0.782187
A0A097PUG4_MOUSE|A0A097PUG4_T133	KO_Early-WT_Early	-0.113048	0.409086	19.4428	0.785201	0.881329	0.105019	0.113048	0.0548618
A0A097PUG4_MOUSE|A0A097PUG4_T133	KO_Late-WT_Late	-0.648067	0.409086	19.4428	0.129283	0.291106	0.888459	0.648067	0.535949
A0A097PUG4_MOUSE|A0A097PUG4_T133	KO_Uninfected-WT_Uninfected	0.0784707	0.472372	19.4428	0.869777	0.942028	0.0605919	0.0784707	0.025936
A0A097PUG4_MOUSE|A0A097PUG4_T133	KO_Early-KO_Uninfected	-0.611856	0.441863	19.4428	0.181825	0.296762	0.740347	0.611856	0.527592
A0A097PUG4_MOUSE|A0A097PUG4_T133	KO_Late-KO_Uninfected	-1.41357	0.441863	19.4428	0.00462342	0.0197473	2.33504	1.41357	1.70449
A0A097PUG4_MOUSE|A0A097PUG4_T133	WT_Early-Wt_Uninfected	-0.420338	0.441863	19.4428	0.353137	0.472661	0.452057	0.420338	0.32545
A0A097PUG4_MOUSE|A0A097PUG4_T133	WT_Late-Wt_Uninfected	-0.687037	0.441863	19.4428	0.136106	0.236632	0.866122	0.687037	0.625927
A0A097PUG4_MOUSE|A0A097PUG4_T133	Infected-Uninfected	-0.783201	0.276953	19.4428	0.0105865	0.0233015	1.97525	0.783201	1.63262
A0A097PUG4_MOUSE|A0A097PUG4_T133	KO-WT	-0.227548	0.248962	19.4428	0.371919	0.499465	0.429552	0.227548	0.301495
A0A097PUG4_MOUSE|A0A097PUG4_T133	Early-Uninfected	-0.516097	0.312445	19.4428	0.114634	0.178067	0.940688	0.516097	0.749416
A0A097PUG4_MOUSE|A0A097PUG4_T133	Late-Uninfected	-1.05031	0.312445	19.4428	0.00319779	0.0100282	2.49515	1.05031	1.99878
A0A0G2JDV2_MOUSE|A0A0G2JDV2_S170	KO_Early-WT_Early	0.488895	0.131784	8.44283	0.00541848	0.0420325	2.26612	0.488895	1.37641
A0A0G2JDV2_MOUSE|A0A0G2JDV2_S170	KO_Late-WT_Late	0.209339	0.131784	8.44283	0.148856	0.319075	0.827233	0.209339	0.496107
A0A0G2JDV2_MOUSE|A0A0G2JDV2_S170	KO_Uninfected-WT_Uninfected	0.291317	0.161401	8.44283	0.10677	0.322729	0.97155	0.291317	0.491163
A0A0G2JDV2_MOUSE|A0A0G2JDV2_S170	KO_Early-KO_Uninfected	-0.130632	0.131784	8.44283	0.349113	0.485732	0.457034	0.130632	0.313603
A0A0G2JDV2_MOUSE|A0A0G2JDV2_S170	KO_Late-KO_Uninfected	0.0708856	0.131784	8.44283	0.604537	0.72917	0.218577	0.0708856	0.137171
A0A0G2JDV2_MOUSE|A0A0G2JDV2_S170	WT_Early-Wt_Uninfected	-0.328211	0.161401	8.44283	0.0745895	0.143269	1.12732	0.328211	0.843849
A0A0G2JDV2_MOUSE|A0A0G2JDV2_S170	WT_Late-Wt_Uninfected	0.152864	0.161401	8.44283	0.369903	0.497272	0.431912	0.152864	0.303406
A0A0G2JDV2_MOUSE|A0A0G2JDV2_S170	Infected-Uninfected	-0.0587735	0.0931852	8.44283	0.544917	0.624053	0.26367	0.0587735	0.204779
A0A0G2JDV2_MOUSE|A0A0G2JDV2_S170	KO-WT	0.32985	0.0821816	8.44283	0.00347053	0.0153191	2.4596	0.32985	1.81477
A0A0G2JDV2_MOUSE|A0A0G2JDV2_S170	Early-Uninfected	-0.229422	0.104184	8.44283	0.0570765	0.0992473	1.24354	0.229422	1.00328
A0A0G2JDV2_MOUSE|A0A0G2JDV2_S170	Late-Uninfected	0.111875	0.104184	8.44283	0.312635	0.412705	0.504962	0.111875	0.38436
A0A0G2JE56_MOUSE|A0A0G2JE56_S28	KO_Early-WT_Early	-0.163119	0.100697	19.4428	0.121361	0.288221	0.915921	0.163119	0.540275
A0A0G2JE56_MOUSE|A0A0G2JE56_S28	KO_Late-WT_Late	-0.031192	0.100697	19.4428	0.760039	0.859942	0.119164	0.031192	0.0655306
A0A0G2JE56_MOUSE|A0A0G2JE56_S28	KO_Uninfected-WT_Uninfected	0.0364626	0.116275	19.4428	0.757172	0.885194	0.120805	0.0364626	0.0529615
A0A0G2JE56_MOUSE|A0A0G2JE56_S28	KO_Early-KO_Uninfected	0.461377	0.108765	19.4428	0.000421799	0.00239707	3.37489	0.461377	2.62032
A0A0G2JE56_MOUSE|A0A0G2JE56_S28	KO_Late-KO_Uninfected	0.269468	0.108765	19.4428	0.0225576	0.0660168	1.64671	0.269468	1.18035
A0A0G2JE56_MOUSE|A0A0G2JE56_S28	WT_Early-Wt_Uninfected	0.660959	0.108765	19.4428	6.90965e-06	8.96512e-05	5.16054	0.660959	4.04744
A0A0G2JE56_MOUSE|A0A0G2JE56_S28	WT_Late-Wt_Uninfected	0.337123	0.108765	19.4428	0.00578642	0.0216497	2.23759	0.337123	1.66455
A0A0G2JE56_MOUSE|A0A0G2JE56_S28	Infected-Uninfected	0.432232	0.0681723	19.4428	3.94443e-06	3.09662e-05	5.40402	0.432232	4.50911
A0A0G2JE56_MOUSE|A0A0G2JE56_S28	KO-WT	-0.0526161	0.0612823	19.4428	0.40103	0.528275	0.396823	0.0526161	0.27714
A0A0G2JE56_MOUSE|A0A0G2JE56_S28	Early-Uninfected	0.561168	0.0769087	19.4428	5.56258e-07	6.09467e-06	6.25472	0.561168	5.21505
A0A0G2JE56_MOUSE|A0A0G2JE56_S28	Late-Uninfected	0.303295	0.0769087	19.4428	0.000839776	0.0033745	3.07584	0.303295	2.47179
A0A0G2JFT8_MOUSE|A0A0G2JFT8_S667	KO_Early-WT_Early	0.134965	0.283268	19.4428	0.639061	0.786488	0.194458	0.134965	0.104308
A0A0G2JFT8_MOUSE|A0A0G2JFT8_S667	KO_Late-WT_Late	0.191504	0.283268	19.4428	0.506971	0.682374	0.295017	0.191504	0.165977
A0A0G2JFT8_MOUSE|A0A0G2JFT8_S667	KO_Uninfected-WT_Uninfected	-0.521524	0.32709	19.4428	0.126966	0.353894	0.896314	0.521524	0.451127
A0A0G2JFT8_MOUSE|A0A0G2JFT8_S667	KO_Early-KO_Uninfected	0.502995	0.305964	19.4428	0.116256	0.210573	0.934583	0.502995	0.676597
A0A0G2JFT8_MOUSE|A0A0G2JFT8_S667	KO_Late-KO_Uninfected	0.609283	0.305964	19.4428	0.0606803	0.138808	1.21695	0.609283	0.857586
A0A0G2JFT8_MOUSE|A0A0G2JFT8_S667	WT_Early-Wt_Uninfected	-0.153493	0.305964	19.4428	0.621533	0.717504	0.206536	0.153493	0.144176
A0A0G2JFT8_MOUSE|A0A0G2JFT8_S667	WT_Late-Wt_Uninfected	-0.103744	0.305964	19.4428	0.738191	0.815789	0.131831	0.103744	0.0884219
A0A0G2JFT8_MOUSE|A0A0G2JFT8_S667	Infected-Uninfected	0.21376	0.191773	19.4428	0.278589	0.361422	0.555036	0.21376	0.441985
A0A0G2JFT8_MOUSE|A0A0G2JFT8_S667	KO-WT	-0.0650185	0.172391	19.4428	0.710143	0.797081	0.148654	0.0650185	0.0984976
A0A0G2JFT8_MOUSE|A0A0G2JFT8_S667	Early-Uninfected	0.174751	0.21635	19.4428	0.429021	0.520027	0.367522	0.174751	0.283974
A0A0G2JFT8_MOUSE|A0A0G2JFT8_S667	Late-Uninfected	0.25277	0.21635	19.4428	0.256796	0.353575	0.590411	0.25277	0.451518
A0A0G2JFZ4_MOUSE|A0A0G2JFZ4_T195	KO_Early-WT_Early	0.0489347	0.149014	19.4428	0.746128	0.857245	0.127187	0.0489347	0.066895
A0A0G2JFZ4_MOUSE|A0A0G2JFZ4_T195	KO_Late-WT_Late	0.283854	0.149014	19.4428	0.0716973	0.200225	1.1445	0.283854	0.698481
A0A0G2JFZ4_MOUSE|A0A0G2JFZ4_T195	KO_Uninfected-WT_Uninfected	-0.0440875	0.172067	19.4428	0.800471	0.907468	0.0966547	0.0440875	0.0421688
A0A0G2JFZ4_MOUSE|A0A0G2JFZ4_T195	KO_Early-KO_Uninfected	0.0289487	0.160954	19.4428	0.859126	0.908853	0.0659431	0.0289487	0.0415065
A0A0G2JFZ4_MOUSE|A0A0G2JFZ4_T195	KO_Late-KO_Uninfected	0.198027	0.160954	19.4428	0.233252	0.37584	0.632175	0.198027	0.424997
A0A0G2JFZ4_MOUSE|A0A0G2JFZ4_T195	WT_Early-Wt_Uninfected	-0.0640734	0.160954	19.4428	0.694905	0.778325	0.158075	0.0640734	0.108839
A0A0G2JFZ4_MOUSE|A0A0G2JFZ4_T195	WT_Late-Wt_Uninfected	-0.129914	0.160954	19.4428	0.429343	0.554836	0.367195	0.129914	0.255835
A0A0G2JFZ4_MOUSE|A0A0G2JFZ4_T195	Infected-Uninfected	0.0082469	0.100883	19.4428	0.935684	0.952458	0.028871	0.0082469	0.0211543
A0A0G2JFZ4_MOUSE|A0A0G2JFZ4_T195	KO-WT	0.0962336	0.0906873	19.4428	0.301623	0.427973	0.520536	0.0962336	0.368583
A0A0G2JFZ4_MOUSE|A0A0G2JFZ4_T195	Early-Uninfected	-0.0175624	0.113812	19.4428	0.878955	0.908766	0.0560332	0.0175624	0.041548
A0A0G2JFZ4_MOUSE|A0A0G2JFZ4_T195	Late-Uninfected	0.0340562	0.113812	19.4428	0.767938	0.826417	0.114674	0.0340562	0.0828005
A0A0N4SW73_MOUSE|A0A0N4SW73_S606	KO_Early-WT_Early	0.166208	0.127835	19.4428	0.208744	0.399821	0.680387	0.166208	0.398134
A0A0N4SW73_MOUSE|A0A0N4SW73_S606	KO_Late-WT_Late	0.135594	0.127835	19.4428	0.301828	0.495579	0.520241	0.135594	0.304887
A0A0N4SW73_MOUSE|A0A0N4SW73_S606	KO_Uninfected-WT_Uninfected	-0.0384984	0.147611	19.4428	0.796981	0.90536	0.0985518	0.0384984	0.0431786
A0A0N4SW73_MOUSE|A0A0N4SW73_S606	KO_Early-KO_Uninfected	-0.140385	0.138077	19.4428	0.321776	0.457135	0.492447	0.140385	0.339955
A0A0N4SW73_MOUSE|A0A0N4SW73_S606	KO_Late-KO_Uninfected	-0.0848019	0.138077	19.4428	0.546228	0.683029	0.262626	0.0848019	0.165561
A0A0N4SW73_MOUSE|A0A0N4SW73_S606	WT_Early-Wt_Uninfected	-0.345091	0.138077	19.4428	0.0215429	0.0542349	1.6667	0.345091	1.26572
A0A0N4SW73_MOUSE|A0A0N4SW73_S606	WT_Late-Wt_Uninfected	-0.258894	0.138077	19.4428	0.0758958	0.152145	1.11978	0.258894	0.817742
A0A0N4SW73_MOUSE|A0A0N4SW73_S606	Infected-Uninfected	-0.207293	0.0865446	19.4428	0.0268181	0.0510658	1.57157	0.207293	1.29187
A0A0N4SW73_MOUSE|A0A0N4SW73_S606	KO-WT	0.0877676	0.0777978	19.4428	0.272986	0.39818	0.56386	0.0877676	0.399921
A0A0N4SW73_MOUSE|A0A0N4SW73_S606	Early-Uninfected	-0.242738	0.0976354	19.4428	0.0221487	0.0449553	1.65465	0.242738	1.34722
A0A0N4SW73_MOUSE|A0A0N4SW73_S606	Late-Uninfected	-0.171848	0.0976354	19.4428	0.0941154	0.15813	1.02634	0.171848	0.800985
A0A0N4SW73_MOUSE|A0A0N4SW73_S626	KO_Early-WT_Early	0.251878	0.154842	19.4428	0.119905	0.286061	0.921163	0.251878	0.543541
A0A0N4SW73_MOUSE|A0A0N4SW73_S626	KO_Late-WT_Late	-0.0227767	0.154842	19.4428	0.884571	0.935359	0.0532673	0.0227767	0.0290219
A0A0N4SW73_MOUSE|A0A0N4SW73_S626	KO_Uninfected-WT_Uninfected	0.0722443	0.178797	19.4428	0.69058	0.848954	0.160786	0.0722443	0.0711161
A0A0N4SW73_MOUSE|A0A0N4SW73_S626	KO_Early-KO_Uninfected	1.02041	0.167249	19.4428	6.55986e-06	8.42684e-05	5.18311	1.02041	4.07434
A0A0N4SW73_MOUSE|A0A0N4SW73_S626	KO_Late-KO_Uninfected	0.695895	0.167249	19.4428	0.000508592	0.00363942	3.29363	0.695895	2.43897
A0A0N4SW73_MOUSE|A0A0N4SW73_S626	WT_Early-Wt_Uninfected	0.840779	0.167249	19.4428	7.00261e-05	0.00056837	4.15474	0.840779	3.24537
A0A0N4SW73_MOUSE|A0A0N4SW73_S626	WT_Late-Wt_Uninfected	0.790916	0.167249	19.4428	0.000137859	0.00131314	3.86057	0.790916	2.88169
A0A0N4SW73_MOUSE|A0A0N4SW73_S626	Infected-Uninfected	0.837001	0.104829	19.4428	1.46665e-07	1.94712e-06	6.83367	0.837001	5.71061
A0A0N4SW73_MOUSE|A0A0N4SW73_S626	KO-WT	0.100449	0.0942341	19.4428	0.299506	0.426057	0.523595	0.100449	0.370532
A0A0N4SW73_MOUSE|A0A0N4SW73_S626	Early-Uninfected	0.930596	0.118263	19.4428	1.82674e-07	2.40616e-06	6.73832	0.930596	5.61868
A0A0N4SW73_MOUSE|A0A0N4SW73_S626	Late-Uninfected	0.743406	0.118263	19.4428	4.42401e-06	4.79303e-05	5.35418	0.743406	4.31939
A0A0N4SW73_MOUSE|A0A0N4SW73_S693	KO_Early-WT_Early	0.143362	0.172376	19.4428	0.415687	0.610914	0.381234	0.143362	0.21402
A0A0N4SW73_MOUSE|A0A0N4SW73_S693	KO_Late-WT_Late	0.0491131	0.172376	19.4428	0.778719	0.870684	0.108619	0.0491131	0.0601396
A0A0N4SW73_MOUSE|A0A0N4SW73_S693	KO_Uninfected-WT_Uninfected	0.296499	0.199042	19.4428	0.152365	0.390449	0.817114	0.296499	0.408436
A0A0N4SW73_MOUSE|A0A0N4SW73_S693	KO_Early-KO_Uninfected	-0.287935	0.186187	19.4428	0.138111	0.240513	0.859772	0.287935	0.618861
A0A0N4SW73_MOUSE|A0A0N4SW73_S693	KO_Late-KO_Uninfected	-0.127206	0.186187	19.4428	0.50253	0.645947	0.298838	0.127206	0.189803
A0A0N4SW73_MOUSE|A0A0N4SW73_S693	WT_Early-Wt_Uninfected	-0.134797	0.186187	19.4428	0.477695	0.592127	0.32085	0.134797	0.227585
A0A0N4SW73_MOUSE|A0A0N4SW73_S693	WT_Late-Wt_Uninfected	0.12018	0.186187	19.4428	0.526162	0.64176	0.278881	0.12018	0.192627
A0A0N4SW73_MOUSE|A0A0N4SW73_S693	Infected-Uninfected	-0.10744	0.116699	19.4428	0.368512	0.454813	0.433548	0.10744	0.342167
A0A0N4SW73_MOUSE|A0A0N4SW73_S693	KO-WT	0.162991	0.104904	19.4428	0.13638	0.236769	0.865249	0.162991	0.625676
A0A0N4SW73_MOUSE|A0A0N4SW73_S693	Early-Uninfected	-0.211366	0.131654	19.4428	0.124512	0.190582	0.904789	0.211366	0.719919
A0A0N4SW73_MOUSE|A0A0N4SW73_S693	Late-Uninfected	-0.00351335	0.131654	19.4428	0.978982	0.98571	0.00922528	0.00351335	0.00625076
A0A0N4SW73_MOUSE|A0A0N4SW73_S930	KO_Early-WT_Early	0.30373	0.342432	8.44283	0.399651	0.596407	0.398319	0.30373	0.224457
A0A0N4SW73_MOUSE|A0A0N4SW73_S930	KO_Late-WT_Late	0.0926306	0.342432	8.44283	0.793265	0.878842	0.100581	0.0926306	0.0560892
A0A0N4SW73_MOUSE|A0A0N4SW73_S930	KO_Uninfected-WT_Uninfected	0.180575	0.419392	8.44283	0.677567	0.841425	0.169048	0.180575	0.0749845
A0A0N4SW73_MOUSE|A0A0N4SW73_S930	KO_Early-KO_Uninfected	2.82956	0.342432	8.44283	2.51313e-05	0.000246175	4.59979	2.82956	3.60876
A0A0N4SW73_MOUSE|A0A0N4SW73_S930	KO_Late-KO_Uninfected	2.20746	0.342432	8.44283	0.000157381	0.00146695	3.80305	2.20746	2.83358
A0A0N4SW73_MOUSE|A0A0N4SW73_S930	WT_Early-Wt_Uninfected	2.70641	0.419392	8.44283	0.000156209	0.00107131	3.80629	2.70641	2.97008
A0A0N4SW73_MOUSE|A0A0N4SW73_S930	WT_Late-Wt_Uninfected	2.29541	0.419392	8.44283	0.000491689	0.00338952	3.30831	2.29541	2.46986
A0A0N4SW73_MOUSE|A0A0N4SW73_S930	Infected-Uninfected	2.50971	0.242136	8.44283	4.33743e-06	3.34919e-05	5.36277	2.50971	4.47506
A0A0N4SW73_MOUSE|A0A0N4SW73_S930	KO-WT	0.192312	0.213544	8.44283	0.392779	0.519877	0.405852	0.192312	0.284099
A0A0N4SW73_MOUSE|A0A0N4SW73_S930	Early-Uninfected	2.76798	0.270716	8.44283	4.82875e-06	3.7527e-05	5.31617	2.76798	4.42566
A0A0N4SW73_MOUSE|A0A0N4SW73_S930	Late-Uninfected	2.25143	0.270716	8.44283	2.39286e-05	0.000189348	4.62108	2.25143	3.72274
A0A0N4SW73_MOUSE|A0A0N4SW73_T886	KO_Early-WT_Early	0.1446	0.222383	19.4428	0.523153	0.699944	0.281371	0.1446	0.154937
A0A0N4SW73_MOUSE|A0A0N4SW73_T886	KO_Late-WT_Late	0.226532	0.222383	19.4428	0.320876	0.515282	0.493663	0.226532	0.287955
A0A0N4SW73_MOUSE|A0A0N4SW73_T886	KO_Uninfected-WT_Uninfected	-0.0188371	0.256786	19.4428	0.942271	0.975616	0.025824	0.0188371	0.0107212
A0A0N4SW73_MOUSE|A0A0N4SW73_T886	KO_Early-KO_Uninfected	2.50873	0.240201	19.4428	2.04296e-09	1.22597e-07	8.68974	2.50873	6.91152
A0A0N4SW73_MOUSE|A0A0N4SW73_T886	KO_Late-KO_Uninfected	1.69032	0.240201	19.4428	9.3503e-07	2.72131e-05	6.02917	1.69032	4.56522
A0A0N4SW73_MOUSE|A0A0N4SW73_T886	WT_Early-Wt_Uninfected	2.34529	0.240201	19.4428	6.19664e-09	3.24102e-07	8.20784	2.34529	6.48932
A0A0N4SW73_MOUSE|A0A0N4SW73_T886	WT_Late-Wt_Uninfected	1.44495	0.240201	19.4428	7.8834e-06	0.000151886	5.10329	1.44495	3.81848
A0A0N4SW73_MOUSE|A0A0N4SW73_T886	Infected-Uninfected	1.99732	0.150554	19.4428	3.38183e-11	1.6396e-09	10.4708	1.99732	8.78526
A0A0N4SW73_MOUSE|A0A0N4SW73_T886	KO-WT	0.117432	0.135338	19.4428	0.396147	0.523209	0.402143	0.117432	0.281325
A0A0N4SW73_MOUSE|A0A0N4SW73_T886	Early-Uninfected	2.42701	0.169848	19.4428	9.07184e-12	5.43254e-10	11.0423	2.42701	9.265
A0A0N4SW73_MOUSE|A0A0N4SW73_T886	Late-Uninfected	1.56764	0.169848	19.4428	1.5374e-08	4.4195e-07	7.81321	1.56764	6.35463
A0A0N4SW73_MOUSE|A0A0N4SW73_T888	KO_Early-WT_Early	0.15042	0.41388	19.4428	0.720199	0.841635	0.142548	0.15042	0.0748762
A0A0N4SW73_MOUSE|A0A0N4SW73_T888	KO_Late-WT_Late	0.283415	0.41388	19.4428	0.501567	0.67808	0.299671	0.283415	0.168719
A0A0N4SW73_MOUSE|A0A0N4SW73_T888	KO_Uninfected-WT_Uninfected	0.175679	0.477907	19.4428	0.717142	0.864262	0.144395	0.175679	0.0633548
A0A0N4SW73_MOUSE|A0A0N4SW73_T888	KO_Early-KO_Uninfected	2.65504	0.447041	19.4428	9.29718e-06	0.000109748	5.03165	2.65504	3.9596
A0A0N4SW73_MOUSE|A0A0N4SW73_T888	KO_Late-KO_Uninfected	1.33019	0.447041	19.4428	0.00763582	0.0289635	2.11714	1.33019	1.53815
A0A0N4SW73_MOUSE|A0A0N4SW73_T888	WT_Early-Wt_Uninfected	2.6803	0.447041	19.4428	8.22949e-06	0.000102858	5.08463	2.6803	3.98776
A0A0N4SW73_MOUSE|A0A0N4SW73_T888	WT_Late-Wt_Uninfected	1.22246	0.447041	19.4428	0.0129876	0.0396053	1.88647	1.22246	1.40225
A0A0N4SW73_MOUSE|A0A0N4SW73_T888	Infected-Uninfected	1.972	0.280198	19.4428	9.33567e-07	9.34345e-06	6.02985	1.972	5.02949
A0A0N4SW73_MOUSE|A0A0N4SW73_T888	KO-WT	0.203171	0.251879	19.4428	0.429641	0.555771	0.366894	0.203171	0.255104
A0A0N4SW73_MOUSE|A0A0N4SW73_T888	Early-Uninfected	2.66767	0.316106	19.4428	6.28954e-08	9.84879e-07	7.20138	2.66767	6.00662
A0A0N4SW73_MOUSE|A0A0N4SW73_T888	Late-Uninfected	1.27633	0.316106	19.4428	0.00067585	0.00284788	3.17015	1.27633	2.54548
A0A0N4SW93_MOUSE|A0A0N4SW93_S866	KO_Early-WT_Early	-0.169276	0.243831	8.44283	0.506185	0.686725	0.295691	0.169276	0.163217
A0A0N4SW93_MOUSE|A0A0N4SW93_S866	KO_Late-WT_Late	0.0349265	0.243831	8.44283	0.88946	0.938326	0.0508736	0.0349265	0.0276461
A0A0N4SW93_MOUSE|A0A0N4SW93_S866	KO_Uninfected-WT_Uninfected	0.206675	0.29863	8.44283	0.507474	0.734923	0.294586	0.206675	0.133758
A0A0N4SW93_MOUSE|A0A0N4SW93_S866	KO_Early-KO_Uninfected	0.85969	0.243831	8.44283	0.00714046	0.0231679	2.14627	0.85969	1.63511
A0A0N4SW93_MOUSE|A0A0N4SW93_S866	KO_Late-KO_Uninfected	1.01995	0.243831	8.44283	0.00272275	0.0130862	2.56499	1.01995	1.88319
A0A0N4SW93_MOUSE|A0A0N4SW93_S866	WT_Early-Wt_Uninfected	1.23564	0.29863	8.44283	0.00290436	0.0109594	2.53695	1.23564	1.96021
A0A0N4SW93_MOUSE|A0A0N4SW93_S866	WT_Late-Wt_Uninfected	1.1917	0.29863	8.44283	0.00358851	0.0150627	2.44509	1.1917	1.8221
A0A0N4SW93_MOUSE|A0A0N4SW93_S866	Infected-Uninfected	1.07675	0.172414	8.44283	0.000197237	0.000815418	3.70501	1.07675	3.08862
A0A0N4SW93_MOUSE|A0A0N4SW93_S866	KO-WT	0.0241083	0.152055	8.44283	0.877751	0.91905	0.0566288	0.0241083	0.0366608
A0A0N4SW93_MOUSE|A0A0N4SW93_S866	Early-Uninfected	1.04767	0.192765	8.44283	0.000515513	0.00188849	3.28776	1.04767	2.72388
A0A0N4SW93_MOUSE|A0A0N4SW93_S866	Late-Uninfected	1.10583	0.192765	8.44283	0.000356824	0.00169541	3.44755	1.10583	2.77073
A0A0R4J031_MOUSE|A0A0R4J031_S23	KO_Early-WT_Early	-0.0589712	0.11616	19.4428	0.617393	0.771963	0.209438	0.0589712	0.112404
A0A0R4J031_MOUSE|A0A0R4J031_S23	KO_Late-WT_Late	-0.0322308	0.11616	19.4428	0.784349	0.874023	0.105491	0.0322308	0.0584769
A0A0R4J031_MOUSE|A0A0R4J031_S23	KO_Uninfected-WT_Uninfected	0.120613	0.13413	19.4428	0.379534	0.635375	0.420749	0.120613	0.19697
A0A0R4J031_MOUSE|A0A0R4J031_S23	KO_Early-KO_Uninfected	-0.728301	0.125467	19.4428	1.24468e-05	0.000139117	4.90494	0.728301	3.85662
A0A0R4J031_MOUSE|A0A0R4J031_S23	KO_Late-KO_Uninfected	-0.492907	0.125467	19.4428	0.000869357	0.00549061	3.0608	0.492907	2.26038
A0A0R4J031_MOUSE|A0A0R4J031_S23	WT_Early-Wt_Uninfected	-0.548717	0.125467	19.4428	0.000311586	0.00185087	3.50642	0.548717	2.73262
A0A0R4J031_MOUSE|A0A0R4J031_S23	WT_Late-Wt_Uninfected	-0.340063	0.125467	19.4428	0.0136892	0.0412904	1.86362	0.340063	1.38415
A0A0R4J031_MOUSE|A0A0R4J031_S23	Infected-Uninfected	-0.527497	0.0786405	19.4428	1.83171e-06	1.63293e-05	5.73714	0.527497	4.78703
A0A0R4J031_MOUSE|A0A0R4J031_S23	KO-WT	0.00980367	0.0706926	19.4428	0.891129	0.928738	0.0500594	0.00980367	0.0321066
A0A0R4J031_MOUSE|A0A0R4J031_S23	Early-Uninfected	-0.638509	0.0887185	19.4428	6.78161e-07	7.20485e-06	6.16867	0.638509	5.14237
A0A0R4J031_MOUSE|A0A0R4J031_S23	Late-Uninfected	-0.416485	0.0887185	19.4428	0.00014917	0.000837393	3.82632	0.416485	3.07707
A0A0R4J0M1_MOUSE|A0A0R4J0M1_S162	KO_Early-WT_Early	-0.138817	0.0875569	19.4429	0.128995	0.299083	0.889426	0.138817	0.524208
A0A0R4J0M1_MOUSE|A0A0R4J0M1_S162	KO_Late-WT_Late	-0.126328	0.0875569	19.4429	0.164992	0.340911	0.782536	0.126328	0.46736
A0A0R4J0M1_MOUSE|A0A0R4J0M1_S162	KO_Uninfected-WT_Uninfected	-0.0595797	0.101102	19.4429	0.562444	0.769886	0.249921	0.0595797	0.113574
A0A0R4J0M1_MOUSE|A0A0R4J0M1_S162	KO_Early-KO_Uninfected	0.769612	0.0945722	19.4429	1.09897e-07	3.15113e-06	6.95901	0.769612	5.50153
A0A0R4J0M1_MOUSE|A0A0R4J0M1_S162	KO_Late-KO_Uninfected	0.42822	0.0945722	19.4429	0.000218415	0.00189368	3.66072	0.42822	2.72269
A0A0R4J0M1_MOUSE|A0A0R4J0M1_S162	WT_Early-Wt_Uninfected	0.848849	0.0945722	19.4429	2.39693e-08	9.78648e-07	7.62035	0.848849	6.00937
A0A0R4J0M1_MOUSE|A0A0R4J0M1_S162	WT_Late-Wt_Uninfected	0.494968	0.0945722	19.4429	4.39821e-05	0.000562265	4.35672	0.494968	3.25006
A0A0R4J0M1_MOUSE|A0A0R4J0M1_S162	Infected-Uninfected	0.635412	0.0592763	19.4429	1.32318e-09	3.5831e-08	8.87838	0.635412	7.44574
A0A0R4J0M1_MOUSE|A0A0R4J0M1_S162	KO-WT	-0.108241	0.0532854	19.4429	0.0561161	0.120907	1.25091	0.108241	0.91755
A0A0R4J0M1_MOUSE|A0A0R4J0M1_S162	Early-Uninfected	0.80923	0.0668727	19.4429	1.68056e-10	6.29547e-09	9.77455	0.80923	8.20097
A0A0R4J0M1_MOUSE|A0A0R4J0M1_S162	Late-Uninfected	0.461594	0.0668727	19.4429	1.22835e-06	1.66583e-05	5.91068	0.461594	4.77837
A0A0R4J0P5_MOUSE|A0A0R4J0P5_S298	KO_Early-WT_Early	0.640445	0.147991	8.44283	0.00222069	0.0239983	2.65351	0.640445	1.61982
A0A0R4J0P5_MOUSE|A0A0R4J0P5_S298	KO_Late-WT_Late	0.652031	0.147991	8.44283	0.00199114	0.0205656	2.7009	0.652031	1.68686
A0A0R4J0P5_MOUSE|A0A0R4J0P5_S298	KO_Uninfected-WT_Uninfected	0.681797	0.181251	8.44283	0.00501773	0.0598777	2.29949	0.681797	1.22273
A0A0R4J0P5_MOUSE|A0A0R4J0P5_S298	KO_Early-KO_Uninfected	0.717223	0.147991	8.44283	0.00109584	0.00513563	2.96025	0.717223	2.28941
A0A0R4J0P5_MOUSE|A0A0R4J0P5_S298	KO_Late-KO_Uninfected	0.442308	0.147991	8.44283	0.0163456	0.0514968	1.7866	0.442308	1.28822
A0A0R4J0P5_MOUSE|A0A0R4J0P5_S298	WT_Early-Wt_Uninfected	0.758575	0.181251	8.44283	0.00271436	0.0103617	2.56633	0.758575	1.98457
A0A0R4J0P5_MOUSE|A0A0R4J0P5_S298	WT_Late-Wt_Uninfected	0.472074	0.181251	8.44283	0.0300314	0.0748911	1.52242	0.472074	1.12557
A0A0R4J0P5_MOUSE|A0A0R4J0P5_S298	Infected-Uninfected	0.597545	0.104645	8.44283	0.000368348	0.00137617	3.43374	0.597545	2.86133
A0A0R4J0P5_MOUSE|A0A0R4J0P5_S298	KO-WT	0.658091	0.0922884	8.44283	7.56988e-05	0.000959744	4.12091	0.658091	3.01784
A0A0R4J0P5_MOUSE|A0A0R4J0P5_S298	Early-Uninfected	0.737899	0.116997	8.44283	0.000183918	0.000795602	3.73537	0.737899	3.0993
A0A0R4J0P5_MOUSE|A0A0R4J0P5_S298	Late-Uninfected	0.457191	0.116997	8.44283	0.00404791	0.0121404	2.39277	0.457191	1.91577
A0A0R4J206_MOUSE|A0A0R4J206_S23	KO_Early-WT_Early	0.0969357	0.179998	19.4428	0.596318	0.757017	0.224522	0.0969357	0.120894
A0A0R4J206_MOUSE|A0A0R4J206_S23	KO_Late-WT_Late	-0.00564451	0.179998	19.4428	0.975303	0.986533	0.0108604	0.00564451	0.00588827
A0A0R4J206_MOUSE|A0A0R4J206_S23	KO_Uninfected-WT_Uninfected	-0.215367	0.207843	19.4428	0.312827	0.575261	0.504696	0.215367	0.240135
A0A0R4J206_MOUSE|A0A0R4J206_S23	KO_Early-KO_Uninfected	1.60547	0.19442	19.4428	8.78828e-08	2.64005e-06	7.0561	1.60547	5.57839
A0A0R4J206_MOUSE|A0A0R4J206_S23	KO_Late-KO_Uninfected	0.745163	0.19442	19.4428	0.00108446	0.00646775	2.96479	0.745163	2.18925
A0A0R4J206_MOUSE|A0A0R4J206_S23	WT_Early-Wt_Uninfected	1.29317	0.19442	19.4428	2.05764e-06	3.3504e-05	5.68663	1.29317	4.4749
A0A0R4J206_MOUSE|A0A0R4J206_S23	WT_Late-Wt_Uninfected	0.535441	0.19442	19.4428	0.0124469	0.038393	1.90494	0.535441	1.41575
A0A0R4J206_MOUSE|A0A0R4J206_S23	Infected-Uninfected	1.04481	0.121859	19.4428	4.91902e-08	7.6836e-07	7.30812	1.04481	6.11444
A0A0R4J206_MOUSE|A0A0R4J206_S23	KO-WT	-0.0413585	0.109543	19.4428	0.709852	0.796825	0.148832	0.0413585	0.0986369
A0A0R4J206_MOUSE|A0A0R4J206_S23	Early-Uninfected	1.44932	0.137475	19.4428	1.74823e-09	4.64432e-08	8.7574	1.44932	7.33308
A0A0R4J206_MOUSE|A0A0R4J206_S23	Late-Uninfected	0.640302	0.137475	19.4428	0.000162294	0.00089473	3.7897	0.640302	3.04831
A0A140DKP8_MOUSE|A0A140DKP8_S363	KO_Early-WT_Early	-0.486838	0.104552	19.4428	0.000162718	0.00439312	3.78856	0.486838	2.35723
A0A140DKP8_MOUSE|A0A140DKP8_S363	KO_Late-WT_Late	-0.327835	0.104552	19.4428	0.00533538	0.0386539	2.27283	0.327835	1.41281
A0A140DKP8_MOUSE|A0A140DKP8_S363	KO_Uninfected-WT_Uninfected	-0.270206	0.120726	19.4428	0.0370909	0.178841	1.43073	0.270206	0.747534
A0A140DKP8_MOUSE|A0A140DKP8_S363	KO_Early-KO_Uninfected	-1.83737	0.112929	19.4428	8.75651e-13	3.34393e-10	12.0577	1.83737	9.47574
A0A140DKP8_MOUSE|A0A140DKP8_S363	KO_Late-KO_Uninfected	-1.40631	0.112929	19.4428	1.02271e-10	2.3433e-08	9.99025	1.40631	7.63017
A0A140DKP8_MOUSE|A0A140DKP8_S363	WT_Early-Wt_Uninfected	-1.62074	0.112929	19.4428	8.39153e-12	1.57873e-09	11.0762	1.62074	8.80169
A0A140DKP8_MOUSE|A0A140DKP8_S363	WT_Late-Wt_Uninfected	-1.34868	0.112929	19.4428	2.10909e-10	4.15392e-08	9.67591	1.34868	7.38154
A0A140DKP8_MOUSE|A0A140DKP8_S363	Infected-Uninfected	-1.55327	0.0707818	19.4428	3.48369e-15	1.05816e-12	14.458	1.55327	11.9754
A0A140DKP8_MOUSE|A0A140DKP8_S363	KO-WT	-0.361626	0.0636281	19.4428	1.62255e-05	0.000302385	4.7898	0.361626	3.51944
A0A140DKP8_MOUSE|A0A140DKP8_S363	Early-Uninfected	-1.72905	0.0798526	19.4428	4.47414e-15	1.14929e-12	14.3493	1.72905	11.9396
A0A140DKP8_MOUSE|A0A140DKP8_S363	Late-Uninfected	-1.37749	0.0798526	19.4428	3.01214e-13	7.16406e-11	12.5211	1.37749	10.1448
A0A171EBK7_MOUSE|A0A171EBK7_S232	KO_Early-WT_Early	-0.156516	0.145063	19.4428	0.293813	0.494726	0.531929	0.156516	0.305636
A0A171EBK7_MOUSE|A0A171EBK7_S232	KO_Late-WT_Late	-0.0777054	0.145063	19.4428	0.598264	0.751391	0.223107	0.0777054	0.124134
A0A171EBK7_MOUSE|A0A171EBK7_S232	KO_Uninfected-WT_Uninfected	-0.454468	0.167504	19.4428	0.0136063	0.10357	1.86626	0.454468	0.984766
A0A171EBK7_MOUSE|A0A171EBK7_S232	KO_Early-KO_Uninfected	0.740907	0.156686	19.4428	0.000137974	0.000972723	3.8602	0.740907	3.01201
A0A171EBK7_MOUSE|A0A171EBK7_S232	KO_Late-KO_Uninfected	0.525143	0.156686	19.4428	0.00327154	0.0151129	2.48525	0.525143	1.82065
A0A171EBK7_MOUSE|A0A171EBK7_S232	WT_Early-Wt_Uninfected	0.442955	0.156686	19.4428	0.0106075	0.0308223	1.97439	0.442955	1.51113
A0A171EBK7_MOUSE|A0A171EBK7_S232	WT_Late-Wt_Uninfected	0.14838	0.156686	19.4428	0.355265	0.482374	0.449447	0.14838	0.316616
A0A171EBK7_MOUSE|A0A171EBK7_S232	Infected-Uninfected	0.464346	0.0982081	19.4428	0.000138107	0.000608604	3.85978	0.464346	3.21566
A0A171EBK7_MOUSE|A0A171EBK7_S232	KO-WT	-0.229563	0.0882825	19.4428	0.0173639	0.0504256	1.76035	0.229563	1.29735
A0A171EBK7_MOUSE|A0A171EBK7_S232	Early-Uninfected	0.591931	0.110794	19.4428	3.44792e-05	0.000193814	4.46244	0.591931	3.71261
A0A171EBK7_MOUSE|A0A171EBK7_S232	Late-Uninfected	0.336761	0.110794	19.4428	0.0066196	0.0181162	2.17917	0.336761	1.74193
A0A171EBK7_MOUSE|A0A171EBK7_S233	KO_Early-WT_Early	-0.269091	0.12581	19.4428	0.0453386	0.154972	1.34353	0.269091	0.809746
A0A171EBK7_MOUSE|A0A171EBK7_S233	KO_Late-WT_Late	-0.231449	0.12581	19.4428	0.081137	0.216018	1.09078	0.231449	0.665511
A0A171EBK7_MOUSE|A0A171EBK7_S233	KO_Uninfected-WT_Uninfected	-0.298541	0.145273	19.4428	0.053562	0.220036	1.27114	0.298541	0.657506
A0A171EBK7_MOUSE|A0A171EBK7_S233	KO_Early-KO_Uninfected	0.475941	0.135891	19.4428	0.0023182	0.00942843	2.63485	0.475941	2.02556
A0A171EBK7_MOUSE|A0A171EBK7_S233	KO_Late-KO_Uninfected	0.333388	0.135891	19.4428	0.0237379	0.0685797	1.62456	0.333388	1.1638
A0A171EBK7_MOUSE|A0A171EBK7_S233	WT_Early-Wt_Uninfected	0.446492	0.135891	19.4428	0.00380034	0.0136283	2.42018	0.446492	1.86556
A0A171EBK7_MOUSE|A0A171EBK7_S233	WT_Late-Wt_Uninfected	0.266297	0.135891	19.4428	0.0645317	0.134706	1.19023	0.266297	0.870613
A0A171EBK7_MOUSE|A0A171EBK7_S233	Infected-Uninfected	0.38053	0.085174	19.4428	0.000250851	0.00100098	3.60058	0.38053	2.99957
A0A171EBK7_MOUSE|A0A171EBK7_S233	KO-WT	-0.26636	0.0765658	19.4428	0.00244654	0.011826	2.61145	0.26636	1.92716
A0A171EBK7_MOUSE|A0A171EBK7_S233	Early-Uninfected	0.461217	0.0960893	19.4428	0.000117277	0.000543204	3.93079	0.461217	3.26504
A0A171EBK7_MOUSE|A0A171EBK7_S233	Late-Uninfected	0.299843	0.0960893	19.4428	0.00552066	0.0156173	2.25801	0.299843	1.80639
A0A171EBK7_MOUSE|A0A171EBK7_T235	KO_Early-WT_Early	-0.0137087	0.118945	19.4428	0.909427	0.951461	0.0412322	0.0137087	0.021609
A0A171EBK7_MOUSE|A0A171EBK7_T235	KO_Late-WT_Late	0.117513	0.118945	19.4428	0.335308	0.529985	0.474556	0.117513	0.275737
A0A171EBK7_MOUSE|A0A171EBK7_T235	KO_Uninfected-WT_Uninfected	-0.117861	0.137346	19.4428	0.401274	0.65243	0.396558	0.117861	0.185466
A0A171EBK7_MOUSE|A0A171EBK7_T235	KO_Early-KO_Uninfected	0.326964	0.128475	19.4428	0.0195479	0.0519985	1.7089	0.326964	1.28401
A0A171EBK7_MOUSE|A0A171EBK7_T235	KO_Late-KO_Uninfected	0.228088	0.128475	19.4428	0.0914971	0.188798	1.03859	0.228088	0.724003
A0A171EBK7_MOUSE|A0A171EBK7_T235	WT_Early-Wt_Uninfected	0.222812	0.128475	19.4428	0.0986962	0.17794	1.0057	0.222812	0.749727
A0A171EBK7_MOUSE|A0A171EBK7_T235	WT_Late-Wt_Uninfected	-0.00728572	0.128475	19.4428	0.955356	0.971228	0.0198349	0.00728572	0.0126787
A0A171EBK7_MOUSE|A0A171EBK7_T235	Infected-Uninfected	0.192645	0.0805261	19.4428	0.0269807	0.0513236	1.56895	0.192645	1.28968
A0A171EBK7_MOUSE|A0A171EBK7_T235	KO-WT	-0.00468555	0.0723876	19.4428	0.949051	0.967626	0.0227105	0.00468555	0.0142925
A0A171EBK7_MOUSE|A0A171EBK7_T235	Early-Uninfected	0.274888	0.0908457	19.4428	0.00682491	0.0166987	2.1659	0.274888	1.77732
A0A171EBK7_MOUSE|A0A171EBK7_T235	Late-Uninfected	0.110401	0.0908457	19.4428	0.238818	0.333583	0.621932	0.110401	0.476796
A0A1B0GQW2_MOUSE|A0A1B0GQW2_S50	KO_Early-WT_Early	-0.261078	0.136287	8.44283	0.0898101	0.239001	1.04667	0.261078	0.621601
A0A1B0GQW2_MOUSE|A0A1B0GQW2_S50	KO_Late-WT_Late	-0.200846	0.136287	8.44283	0.17684	0.355939	0.752419	0.200846	0.448624
A0A1B0GQW2_MOUSE|A0A1B0GQW2_S50	KO_Uninfected-WT_Uninfected	-0.283744	0.166916	8.44283	0.125586	0.351788	0.901057	0.283744	0.453719
A0A1B0GQW2_MOUSE|A0A1B0GQW2_S50	KO_Early-KO_Uninfected	-0.148608	0.136287	8.44283	0.305674	0.440468	0.514741	0.148608	0.356086
A0A1B0GQW2_MOUSE|A0A1B0GQW2_S50	KO_Late-KO_Uninfected	-0.0362551	0.136287	8.44283	0.796605	0.870069	0.098757	0.0362551	0.0604461
A0A1B0GQW2_MOUSE|A0A1B0GQW2_S50	WT_Early-Wt_Uninfected	-0.171274	0.166916	8.44283	0.333341	0.453199	0.477111	0.171274	0.343711
A0A1B0GQW2_MOUSE|A0A1B0GQW2_S50	WT_Late-Wt_Uninfected	-0.119153	0.166916	8.44283	0.494581	0.615115	0.305762	0.119153	0.211043
A0A1B0GQW2_MOUSE|A0A1B0GQW2_S50	Infected-Uninfected	-0.118822	0.0963692	8.44283	0.250806	0.331466	0.600663	0.118822	0.479561
A0A1B0GQW2_MOUSE|A0A1B0GQW2_S50	KO-WT	-0.248556	0.0849897	8.44283	0.018082	0.0519783	1.74275	0.248556	1.28418
A0A1B0GQW2_MOUSE|A0A1B0GQW2_S50	Early-Uninfected	-0.159941	0.107744	8.44283	0.174036	0.250335	0.759361	0.159941	0.601479
A0A1B0GQW2_MOUSE|A0A1B0GQW2_S50	Late-Uninfected	-0.0777039	0.107744	8.44283	0.49028	0.587194	0.309556	0.0777039	0.231218
A0A1B0GR85_MOUSE|A0A1B0GR85_S1035	KO_Early-WT_Early	-0.322459	0.127169	8.44283	0.0335167	0.128913	1.47474	0.322459	0.889704
A0A1B0GR85_MOUSE|A0A1B0GR85_S1035	KO_Late-WT_Late	-0.0528838	0.127169	8.44283	0.687887	0.813729	0.162483	0.0528838	0.0895203
A0A1B0GR85_MOUSE|A0A1B0GR85_S1035	KO_Uninfected-WT_Uninfected	-0.067411	0.15575	8.44283	0.675993	0.840562	0.170058	0.067411	0.0754303
A0A1B0GR85_MOUSE|A0A1B0GR85_S1035	KO_Early-KO_Uninfected	0.160226	0.127169	8.44283	0.2414	0.368764	0.617263	0.160226	0.433251
A0A1B0GR85_MOUSE|A0A1B0GR85_S1035	KO_Late-KO_Uninfected	-0.0750104	0.127169	8.44283	0.570738	0.701782	0.243563	0.0750104	0.153798
A0A1B0GR85_MOUSE|A0A1B0GR85_S1035	WT_Early-Wt_Uninfected	0.415274	0.15575	8.44283	0.0272188	0.0652028	1.56513	0.415274	1.18573
A0A1B0GR85_MOUSE|A0A1B0GR85_S1035	WT_Late-Wt_Uninfected	-0.0895377	0.15575	8.44283	0.580364	0.687934	0.236299	0.0895377	0.162453
A0A1B0GR85_MOUSE|A0A1B0GR85_S1035	Infected-Uninfected	0.102738	0.0899221	8.44283	0.284601	0.367802	0.545764	0.102738	0.434386
A0A1B0GR85_MOUSE|A0A1B0GR85_S1035	KO-WT	-0.147584	0.0793038	8.44283	0.0978349	0.183672	1.00951	0.147584	0.735958
A0A1B0GR85_MOUSE|A0A1B0GR85_S1035	Early-Uninfected	0.28775	0.100536	8.44283	0.0199518	0.04124	1.70002	0.28775	1.38468
A0A1B0GR85_MOUSE|A0A1B0GR85_S1035	Late-Uninfected	-0.082274	0.100536	8.44283	0.435642	0.535793	0.36087	0.082274	0.271003
A0A1B0GR85_MOUSE|A0A1B0GR85_S1041	KO_Early-WT_Early	-0.349175	0.226587	19.4428	0.139431	0.31399	0.855641	0.349175	0.503085
A0A1B0GR85_MOUSE|A0A1B0GR85_S1041	KO_Late-WT_Late	-0.321452	0.226587	19.4428	0.171829	0.349536	0.764905	0.321452	0.456508
A0A1B0GR85_MOUSE|A0A1B0GR85_S1041	KO_Uninfected-WT_Uninfected	0.365968	0.261641	19.4428	0.17764	0.424325	0.75046	0.365968	0.372301
A0A1B0GR85_MOUSE|A0A1B0GR85_S1041	KO_Early-KO_Uninfected	0.510777	0.244742	19.4428	0.0502791	0.10948	1.29861	0.510777	0.960664
A0A1B0GR85_MOUSE|A0A1B0GR85_S1041	KO_Late-KO_Uninfected	0.448818	0.244742	19.4428	0.082032	0.173815	1.08602	0.448818	0.759912
A0A1B0GR85_MOUSE|A0A1B0GR85_S1041	WT_Early-Wt_Uninfected	1.22592	0.244742	19.4428	7.29489e-05	0.000586664	4.13698	1.22592	3.23161
A0A1B0GR85_MOUSE|A0A1B0GR85_S1041	WT_Late-Wt_Uninfected	1.13624	0.244742	19.4428	0.000167956	0.00152309	3.7748	1.13624	2.81728
A0A1B0GR85_MOUSE|A0A1B0GR85_S1041	Infected-Uninfected	0.830438	0.1534	19.4428	2.94451e-05	0.00016678	4.53099	0.830438	3.77786
A0A1B0GR85_MOUSE|A0A1B0GR85_S1041	KO-WT	-0.101553	0.137897	19.4428	0.470255	0.593717	0.327667	0.101553	0.22642
A0A1B0GR85_MOUSE|A0A1B0GR85_S1041	Early-Uninfected	0.868349	0.173059	19.4428	7.15405e-05	0.000357717	4.14545	0.868349	3.44646
A0A1B0GR85_MOUSE|A0A1B0GR85_S1041	Late-Uninfected	0.792528	0.173059	19.4428	0.000194055	0.00103563	3.71207	0.792528	2.98479
A0A1B0GR85_MOUSE|A0A1B0GR85_S1045	KO_Early-WT_Early	-0.501929	0.158154	19.4428	0.00489703	0.039461	2.31007	0.501929	1.40383
A0A1B0GR85_MOUSE|A0A1B0GR85_S1045	KO_Late-WT_Late	-0.518183	0.158154	19.4428	0.00388082	0.0315725	2.41108	0.518183	1.50069
A0A1B0GR85_MOUSE|A0A1B0GR85_S1045	KO_Uninfected-WT_Uninfected	0.0994786	0.182621	19.4428	0.592135	0.790109	0.227579	0.0994786	0.102313
A0A1B0GR85_MOUSE|A0A1B0GR85_S1045	KO_Early-KO_Uninfected	0.96803	0.170826	19.4428	1.68304e-05	0.000178083	4.77391	0.96803	3.74938
A0A1B0GR85_MOUSE|A0A1B0GR85_S1045	KO_Late-KO_Uninfected	0.801415	0.170826	19.4428	0.000150212	0.00141743	3.82329	0.801415	2.8485
A0A1B0GR85_MOUSE|A0A1B0GR85_S1045	WT_Early-Wt_Uninfected	1.56944	0.170826	19.4428	1.65456e-08	7.39563e-07	7.78132	1.56944	6.13102
A0A1B0GR85_MOUSE|A0A1B0GR85_S1045	WT_Late-Wt_Uninfected	1.41908	0.170826	19.4428	8.0201e-08	4.28106e-06	7.09582	1.41908	5.36845
A0A1B0GR85_MOUSE|A0A1B0GR85_S1045	Infected-Uninfected	1.18949	0.107071	19.4428	7.25062e-10	2.13297e-08	9.13962	1.18949	7.67102
A0A1B0GR85_MOUSE|A0A1B0GR85_S1045	KO-WT	-0.306878	0.0962497	19.4428	0.00473733	0.0193064	2.32447	0.306878	1.7143
A0A1B0GR85_MOUSE|A0A1B0GR85_S1045	Early-Uninfected	1.26873	0.120792	19.4428	1.85958e-09	4.87843e-08	8.73059	1.26873	7.31172
A0A1B0GR85_MOUSE|A0A1B0GR85_S1045	Late-Uninfected	1.11025	0.120792	19.4428	1.64302e-08	4.66467e-07	7.78436	1.11025	6.33118
A0A1B0GR85_MOUSE|A0A1B0GR85_S1132	KO_Early-WT_Early	-0.759173	0.280281	19.4428	0.0137417	0.0744349	1.86196	0.759173	1.12822
A0A1B0GR85_MOUSE|A0A1B0GR85_S1132	KO_Late-WT_Late	-0.725986	0.280281	19.4428	0.0177448	0.0832128	1.75093	0.725986	1.07981
A0A1B0GR85_MOUSE|A0A1B0GR85_S1132	KO_Uninfected-WT_Uninfected	-0.154766	0.32364	19.4428	0.637838	0.817993	0.19529	0.154766	0.0872504
A0A1B0GR85_MOUSE|A0A1B0GR85_S1132	KO_Early-KO_Uninfected	-0.0204117	0.302738	19.4428	0.946933	0.966294	0.0236808	0.0204117	0.0148907
A0A1B0GR85_MOUSE|A0A1B0GR85_S1132	KO_Late-KO_Uninfected	-0.200752	0.302738	19.4428	0.515038	0.657408	0.288161	0.200752	0.182165
A0A1B0GR85_MOUSE|A0A1B0GR85_S1132	WT_Early-Wt_Uninfected	0.583995	0.302738	19.4428	0.0684521	0.133981	1.16461	0.583995	0.872957
A0A1B0GR85_MOUSE|A0A1B0GR85_S1132	WT_Late-Wt_Uninfected	0.370468	0.302738	19.4428	0.23568	0.356225	0.627678	0.370468	0.448275
A0A1B0GR85_MOUSE|A0A1B0GR85_S1132	Infected-Uninfected	0.183325	0.189751	19.4428	0.345842	0.431464	0.461122	0.183325	0.365055
A0A1B0GR85_MOUSE|A0A1B0GR85_S1132	KO-WT	-0.546642	0.170573	19.4428	0.00456518	0.0187891	2.34054	0.546642	1.72609
A0A1B0GR85_MOUSE|A0A1B0GR85_S1132	Early-Uninfected	0.281792	0.214068	19.4428	0.20336	0.284133	0.691735	0.281792	0.546478
A0A1B0GR85_MOUSE|A0A1B0GR85_S1132	Late-Uninfected	0.0848578	0.214068	19.4428	0.696123	0.767916	0.157314	0.0848578	0.114686
A0A1B0GR85_MOUSE|A0A1B0GR85_S1242	KO_Early-WT_Early	-0.295705	0.178831	19.4428	0.114275	0.277635	0.942049	0.295705	0.556525
A0A1B0GR85_MOUSE|A0A1B0GR85_S1242	KO_Late-WT_Late	-0.35841	0.178831	19.4428	0.0591809	0.1775	1.22782	0.35841	0.750801
A0A1B0GR85_MOUSE|A0A1B0GR85_S1242	KO_Uninfected-WT_Uninfected	-0.247987	0.206496	19.4428	0.244205	0.50375	0.612246	0.247987	0.297785
A0A1B0GR85_MOUSE|A0A1B0GR85_S1242	KO_Early-KO_Uninfected	0.919843	0.193159	19.4428	0.000127823	0.000913426	3.89339	0.919843	3.03933
A0A1B0GR85_MOUSE|A0A1B0GR85_S1242	KO_Late-KO_Uninfected	0.733002	0.193159	19.4428	0.00118361	0.00691832	2.92679	0.733002	2.16
A0A1B0GR85_MOUSE|A0A1B0GR85_S1242	WT_Early-Wt_Uninfected	0.967561	0.193159	19.4428	7.29296e-05	0.000586664	4.1371	0.967561	3.23161
A0A1B0GR85_MOUSE|A0A1B0GR85_S1242	WT_Late-Wt_Uninfected	0.843425	0.193159	19.4428	0.00031659	0.00246101	3.4995	0.843425	2.60889
A0A1B0GR85_MOUSE|A0A1B0GR85_S1242	Infected-Uninfected	0.865958	0.121069	19.4428	7.41186e-07	7.73408e-06	6.13007	0.865958	5.11159
A0A1B0GR85_MOUSE|A0A1B0GR85_S1242	KO-WT	-0.300701	0.108833	19.4428	0.0122069	0.0390574	1.91339	0.300701	1.4083
A0A1B0GR85_MOUSE|A0A1B0GR85_S1242	Early-Uninfected	0.943702	0.136584	19.4428	1.21162e-06	1.17802e-05	5.91663	0.943702	4.92885
A0A1B0GR85_MOUSE|A0A1B0GR85_S1242	Late-Uninfected	0.788214	0.136584	19.4428	1.33996e-05	0.000117789	4.87291	0.788214	3.9289
A0A1B0GR85_MOUSE|A0A1B0GR85_S1331	KO_Early-WT_Early	-0.17827	0.135216	19.4428	0.202686	0.392152	0.693176	0.17827	0.406546
A0A1B0GR85_MOUSE|A0A1B0GR85_S1331	KO_Late-WT_Late	0.0186601	0.135216	19.4428	0.891658	0.939584	0.0498017	0.0186601	0.0270645
A0A1B0GR85_MOUSE|A0A1B0GR85_S1331	KO_Uninfected-WT_Uninfected	-0.0555013	0.156134	19.4428	0.726063	0.869103	0.139026	0.0555013	0.060929
A0A1B0GR85_MOUSE|A0A1B0GR85_S1331	KO_Early-KO_Uninfected	-1.15984	0.14605	19.4428	1.59135e-07	4.27139e-06	6.79823	1.15984	5.36943
A0A1B0GR85_MOUSE|A0A1B0GR85_S1331	KO_Late-KO_Uninfected	-0.702821	0.14605	19.4428	0.000114028	0.00114528	3.94299	0.702821	2.94109
A0A1B0GR85_MOUSE|A0A1B0GR85_S1331	WT_Early-Wt_Uninfected	-1.03707	0.14605	19.4428	8.22416e-07	1.60101e-05	6.08491	1.03707	4.79561
A0A1B0GR85_MOUSE|A0A1B0GR85_S1331	WT_Late-Wt_Uninfected	-0.776983	0.14605	19.4428	3.62666e-05	0.00048503	4.44049	0.776983	3.31423
A0A1B0GR85_MOUSE|A0A1B0GR85_S1331	Infected-Uninfected	-0.919177	0.0915414	19.4428	3.91789e-09	8.98762e-08	8.40695	0.919177	7.04636
A0A1B0GR85_MOUSE|A0A1B0GR85_S1331	KO-WT	-0.0717038	0.0822896	19.4428	0.394191	0.521253	0.404294	0.0717038	0.282951
A0A1B0GR85_MOUSE|A0A1B0GR85_S1331	Early-Uninfected	-1.09845	0.103273	19.4428	1.50725e-09	4.05975e-08	8.82181	1.09845	7.3915
A0A1B0GR85_MOUSE|A0A1B0GR85_S1331	Late-Uninfected	-0.739902	0.103273	19.4428	7.23668e-07	1.0732e-05	6.14046	0.739902	4.96932
A0A1B0GR85_MOUSE|A0A1B0GR85_S1454	KO_Early-WT_Early	-0.294057	0.157872	8.44283	0.0975867	0.251493	1.01061	0.294057	0.599474
A0A1B0GR85_MOUSE|A0A1B0GR85_S1454	KO_Late-WT_Late	-0.152911	0.157872	8.44283	0.359683	0.55413	0.44408	0.152911	0.256389
A0A1B0GR85_MOUSE|A0A1B0GR85_S1454	KO_Uninfected-WT_Uninfected	-0.140228	0.193353	8.44283	0.487917	0.720052	0.311654	0.140228	0.142636
A0A1B0GR85_MOUSE|A0A1B0GR85_S1454	KO_Early-KO_Uninfected	0.361996	0.157872	8.44283	0.0493776	0.107909	1.30647	0.361996	0.966942
A0A1B0GR85_MOUSE|A0A1B0GR85_S1454	KO_Late-KO_Uninfected	0.0887377	0.157872	8.44283	0.588666	0.716473	0.230131	0.0887377	0.1448
A0A1B0GR85_MOUSE|A0A1B0GR85_S1454	WT_Early-Wt_Uninfected	0.515825	0.193353	8.44283	0.027154	0.0651023	1.56617	0.515825	1.1864
A0A1B0GR85_MOUSE|A0A1B0GR85_S1454	WT_Late-Wt_Uninfected	0.101421	0.193353	8.44283	0.613396	0.715614	0.212259	0.101421	0.145321
A0A1B0GR85_MOUSE|A0A1B0GR85_S1454	Infected-Uninfected	0.266995	0.111632	8.44283	0.0421754	0.0748316	1.37494	0.266995	1.12591
A0A1B0GR85_MOUSE|A0A1B0GR85_S1454	KO-WT	-0.195732	0.0984505	8.44283	0.0801323	0.158429	1.09619	0.195732	0.800165
A0A1B0GR85_MOUSE|A0A1B0GR85_S1454	Early-Uninfected	0.438911	0.124809	8.44283	0.00723943	0.0175359	2.1403	0.438911	1.75607
A0A1B0GR85_MOUSE|A0A1B0GR85_S1454	Late-Uninfected	0.0950793	0.124809	8.44283	0.466925	0.56532	0.330753	0.0950793	0.247706
A0A1B0GR85_MOUSE|A0A1B0GR85_S227	KO_Early-WT_Early	0.137981	0.297148	8.44283	0.654137	0.797722	0.184331	0.137981	0.0981483
A0A1B0GR85_MOUSE|A0A1B0GR85_S227	KO_Late-WT_Late	-0.0329728	0.297148	8.44283	0.914238	0.952764	0.0389409	0.0329728	0.0210145
A0A1B0GR85_MOUSE|A0A1B0GR85_S227	KO_Uninfected-WT_Uninfected	-0.189881	0.363931	8.44283	0.615252	0.804996	0.210947	0.189881	0.0942062
A0A1B0GR85_MOUSE|A0A1B0GR85_S227	KO_Early-KO_Uninfected	0.867921	0.297148	8.44283	0.018188	0.0490016	1.74022	0.867921	1.30979
A0A1B0GR85_MOUSE|A0A1B0GR85_S227	KO_Late-KO_Uninfected	0.986412	0.297148	8.44283	0.00977625	0.0349703	2.00983	0.986412	1.4563
A0A1B0GR85_MOUSE|A0A1B0GR85_S227	WT_Early-Wt_Uninfected	0.540059	0.363931	8.44283	0.174163	0.276419	0.759045	0.540059	0.558432
A0A1B0GR85_MOUSE|A0A1B0GR85_S227	WT_Late-Wt_Uninfected	0.829503	0.363931	8.44283	0.0504672	0.111424	1.29699	0.829503	0.953021
A0A1B0GR85_MOUSE|A0A1B0GR85_S227	Infected-Uninfected	0.805974	0.210115	8.44283	0.00449725	0.0113377	2.34705	0.805974	1.94548
A0A1B0GR85_MOUSE|A0A1B0GR85_S227	KO-WT	-0.0282912	0.185304	8.44283	0.882241	0.922238	0.0544126	0.0282912	0.0351572
A0A1B0GR85_MOUSE|A0A1B0GR85_S227	Early-Uninfected	0.70399	0.234916	8.44283	0.0161414	0.0345509	1.79206	0.70399	1.46154
A0A1B0GR85_MOUSE|A0A1B0GR85_S227	Late-Uninfected	0.907958	0.234916	8.44283	0.00430877	0.0127513	2.36565	0.907958	1.89445
A0A1B0GR85_MOUSE|A0A1B0GR85_S403	KO_Early-WT_Early	-0.755197	0.187638	8.44283	0.00341541	0.031645	2.46656	0.755197	1.4997
A0A1B0GR85_MOUSE|A0A1B0GR85_S403	KO_Late-WT_Late	-0.800272	0.187638	8.44283	0.00242476	0.0234856	2.61533	0.800272	1.6292
A0A1B0GR85_MOUSE|A0A1B0GR85_S403	KO_Uninfected-WT_Uninfected	-0.440444	0.229808	8.44283	0.0896813	0.293527	1.0473	0.440444	0.532352
A0A1B0GR85_MOUSE|A0A1B0GR85_S403	KO_Early-KO_Uninfected	-0.653071	0.187638	8.44283	0.00764713	0.0244468	2.1165	0.653071	1.61178
A0A1B0GR85_MOUSE|A0A1B0GR85_S403	KO_Late-KO_Uninfected	-0.968428	0.187638	8.44283	0.000727673	0.00482131	3.13806	0.968428	2.31683
A0A1B0GR85_MOUSE|A0A1B0GR85_S403	WT_Early-Wt_Uninfected	-0.338318	0.229808	8.44283	0.177243	0.280215	0.75143	0.338318	0.552509
A0A1B0GR85_MOUSE|A0A1B0GR85_S403	WT_Late-Wt_Uninfected	-0.608599	0.229808	8.44283	0.0280098	0.0710319	1.55269	0.608599	1.14855
A0A1B0GR85_MOUSE|A0A1B0GR85_S403	Infected-Uninfected	-0.642104	0.13268	8.44283	0.00110591	0.0034622	2.95628	0.642104	2.46065
A0A1B0GR85_MOUSE|A0A1B0GR85_S403	KO-WT	-0.665304	0.117013	8.44283	0.000379356	0.00304529	3.42095	0.665304	2.51637
A0A1B0GR85_MOUSE|A0A1B0GR85_S403	Early-Uninfected	-0.495694	0.148341	8.44283	0.00945166	0.0220125	2.02449	0.495694	1.65733
A0A1B0GR85_MOUSE|A0A1B0GR85_S403	Late-Uninfected	-0.788513	0.148341	8.44283	0.000598347	0.00257708	3.22305	0.788513	2.58887
A0A1B0GR85_MOUSE|A0A1B0GR85_S719	KO_Early-WT_Early	-0.436078	0.105727	19.4428	0.000552985	0.0100373	3.25729	0.436078	1.99838
A0A1B0GR85_MOUSE|A0A1B0GR85_S719	KO_Late-WT_Late	-0.425737	0.105727	19.4428	0.000693055	0.0104693	3.15923	0.425737	1.98008
A0A1B0GR85_MOUSE|A0A1B0GR85_S719	KO_Uninfected-WT_Uninfected	-0.293557	0.122083	19.4428	0.0262985	0.148493	1.58007	0.293557	0.828293
A0A1B0GR85_MOUSE|A0A1B0GR85_S719	KO_Early-KO_Uninfected	-0.449851	0.114198	19.4428	0.000848254	0.00418793	3.07147	0.449851	2.378
A0A1B0GR85_MOUSE|A0A1B0GR85_S719	KO_Late-KO_Uninfected	-0.676345	0.114198	19.4428	9.63654e-06	0.000170203	5.01608	0.676345	3.76903
A0A1B0GR85_MOUSE|A0A1B0GR85_S719	WT_Early-Wt_Uninfected	-0.307331	0.114198	19.4428	0.014271	0.0392421	1.84555	0.307331	1.40625
A0A1B0GR85_MOUSE|A0A1B0GR85_S719	WT_Late-Wt_Uninfected	-0.544165	0.114198	19.4428	0.000126949	0.00123981	3.89637	0.544165	2.90665
A0A1B0GR85_MOUSE|A0A1B0GR85_S719	Infected-Uninfected	-0.494423	0.0715773	19.4428	1.216e-06	1.1652e-05	5.91507	0.494423	4.9336
A0A1B0GR85_MOUSE|A0A1B0GR85_S719	KO-WT	-0.385124	0.0643432	19.4428	8.41222e-06	0.000184593	5.07509	0.385124	3.73378
A0A1B0GR85_MOUSE|A0A1B0GR85_S719	Early-Uninfected	-0.378591	0.0807501	19.4428	0.000151239	0.000675084	3.82034	0.378591	3.17064
A0A1B0GR85_MOUSE|A0A1B0GR85_S719	Late-Uninfected	-0.610255	0.0807501	19.4428	3.33084e-07	5.70088e-06	6.47745	0.610255	5.24406
A0A1B0GR85_MOUSE|A0A1B0GR85_S823	KO_Early-WT_Early	-0.118377	0.174117	19.4428	0.504602	0.685454	0.297051	0.118377	0.164022
A0A1B0GR85_MOUSE|A0A1B0GR85_S823	KO_Late-WT_Late	-0.0886254	0.174117	19.4428	0.616481	0.764125	0.210081	0.0886254	0.116836
A0A1B0GR85_MOUSE|A0A1B0GR85_S823	KO_Uninfected-WT_Uninfected	-0.220064	0.201053	19.4428	0.287085	0.549904	0.541989	0.220064	0.259713
A0A1B0GR85_MOUSE|A0A1B0GR85_S823	KO_Early-KO_Uninfected	-0.910346	0.188068	19.4428	0.000106912	0.000790903	3.97097	0.910346	3.10188
A0A1B0GR85_MOUSE|A0A1B0GR85_S823	KO_Late-KO_Uninfected	-0.672646	0.188068	19.4428	0.0019554	0.0101428	2.70876	0.672646	1.99384
A0A1B0GR85_MOUSE|A0A1B0GR85_S823	WT_Early-Wt_Uninfected	-1.01203	0.188068	19.4428	3.16398e-05	0.000300655	4.49977	1.01203	3.52193
A0A1B0GR85_MOUSE|A0A1B0GR85_S823	WT_Late-Wt_Uninfected	-0.804085	0.188068	19.4428	0.000390404	0.00285278	3.40849	0.804085	2.54473
A0A1B0GR85_MOUSE|A0A1B0GR85_S823	Infected-Uninfected	-0.849778	0.117878	19.4428	6.62172e-07	7.02315e-06	6.17903	0.849778	5.15347
A0A1B0GR85_MOUSE|A0A1B0GR85_S823	KO-WT	-0.142355	0.105964	19.4428	0.194604	0.309074	0.710848	0.142355	0.509937
A0A1B0GR85_MOUSE|A0A1B0GR85_S823	Early-Uninfected	-0.96119	0.132984	19.4428	6.37692e-07	6.84996e-06	6.19539	0.96119	5.16431
A0A1B0GR85_MOUSE|A0A1B0GR85_S823	Late-Uninfected	-0.738365	0.132984	19.4428	2.16533e-05	0.00017429	4.66448	0.738365	3.75873
A0A1B0GR85_MOUSE|A0A1B0GR85_S880	KO_Early-WT_Early	-0.252614	0.129411	19.4428	0.0654886	0.196326	1.18383	0.252614	0.707023
A0A1B0GR85_MOUSE|A0A1B0GR85_S880	KO_Late-WT_Late	-0.243046	0.129411	19.4428	0.0754508	0.206319	1.12234	0.243046	0.685461
A0A1B0GR85_MOUSE|A0A1B0GR85_S880	KO_Uninfected-WT_Uninfected	0.0450689	0.149431	19.4428	0.766157	0.890136	0.115682	0.0450689	0.0505435
A0A1B0GR85_MOUSE|A0A1B0GR85_S880	KO_Early-KO_Uninfected	-0.549161	0.13978	19.4428	0.000869027	0.00427625	3.06097	0.549161	2.36894
A0A1B0GR85_MOUSE|A0A1B0GR85_S880	KO_Late-KO_Uninfected	-0.415835	0.13978	19.4428	0.00764663	0.0289944	2.11653	0.415835	1.53769
A0A1B0GR85_MOUSE|A0A1B0GR85_S880	WT_Early-Wt_Uninfected	-0.251478	0.13978	19.4428	0.0875457	0.161984	1.05776	0.251478	0.790529
A0A1B0GR85_MOUSE|A0A1B0GR85_S880	WT_Late-Wt_Uninfected	-0.127719	0.13978	19.4428	0.372059	0.499446	0.429388	0.127719	0.301511
A0A1B0GR85_MOUSE|A0A1B0GR85_S880	Infected-Uninfected	-0.336048	0.0876119	19.4428	0.00107726	0.00338749	2.96768	0.336048	2.47012
A0A1B0GR85_MOUSE|A0A1B0GR85_S880	KO-WT	-0.150197	0.0787573	19.4428	0.0713941	0.145189	1.14634	0.150197	0.838065
A0A1B0GR85_MOUSE|A0A1B0GR85_S880	Early-Uninfected	-0.400319	0.0988396	19.4428	0.000656566	0.0023086	3.18272	0.400319	2.63665
A0A1B0GR85_MOUSE|A0A1B0GR85_S880	Late-Uninfected	-0.271777	0.0988396	19.4428	0.0125662	0.0305739	1.9008	0.271777	1.51465
A0A1B0GR85_MOUSE|A0A1B0GR85_T923	KO_Early-WT_Early	-0.948464	0.190046	8.44283	0.000906699	0.0135699	3.04254	0.948464	1.86742
A0A1B0GR85_MOUSE|A0A1B0GR85_T923	KO_Late-WT_Late	-0.692749	0.190046	8.44283	0.00596713	0.0414444	2.22423	0.692749	1.38253
A0A1B0GR85_MOUSE|A0A1B0GR85_T923	KO_Uninfected-WT_Uninfected	-0.469344	0.232758	8.44283	0.0766285	0.270185	1.11561	0.469344	0.568339
A0A1B0GR85_MOUSE|A0A1B0GR85_T923	KO_Early-KO_Uninfected	-0.222555	0.190046	8.44283	0.273565	0.40528	0.56294	0.222555	0.392244
A0A1B0GR85_MOUSE|A0A1B0GR85_T923	KO_Late-KO_Uninfected	0.0613407	0.190046	8.44283	0.75472	0.841904	0.122214	0.0613407	0.0747375
A0A1B0GR85_MOUSE|A0A1B0GR85_T923	WT_Early-Wt_Uninfected	0.256565	0.232758	8.44283	0.300766	0.419492	0.521771	0.256565	0.377276
A0A1B0GR85_MOUSE|A0A1B0GR85_T923	WT_Late-Wt_Uninfected	0.284746	0.232758	8.44283	0.25424	0.377178	0.594756	0.284746	0.423453
A0A1B0GR85_MOUSE|A0A1B0GR85_T923	Infected-Uninfected	0.0950243	0.134383	8.44283	0.498545	0.579857	0.302296	0.0950243	0.236679
A0A1B0GR85_MOUSE|A0A1B0GR85_T923	KO-WT	-0.703519	0.118515	8.44283	0.00028166	0.00246238	3.55027	0.703519	2.60864
A0A1B0GR85_MOUSE|A0A1B0GR85_T923	Early-Uninfected	0.0170053	0.150245	8.44283	0.91253	0.935313	0.0397527	0.0170053	0.0290429
A0A1B0GR85_MOUSE|A0A1B0GR85_T923	Late-Uninfected	0.173043	0.150245	8.44283	0.280996	0.379686	0.5513	0.173043	0.420575
A0A1D5RLD1_MOUSE|A0A1D5RLD1_S718	KO_Early-WT_Early	0.134182	0.107537	19.4428	0.226933	0.421414	0.644102	0.134182	0.375291
A0A1D5RLD1_MOUSE|A0A1D5RLD1_S718	KO_Late-WT_Late	-0.0198193	0.107537	19.4428	0.855686	0.91775	0.0676857	0.0198193	0.0372756
A0A1D5RLD1_MOUSE|A0A1D5RLD1_S718	KO_Uninfected-WT_Uninfected	-0.0861292	0.124174	19.4428	0.496125	0.726622	0.304409	0.0861292	0.138692
A0A1D5RLD1_MOUSE|A0A1D5RLD1_S718	KO_Early-KO_Uninfected	-0.682734	0.116154	19.4428	1.06172e-05	0.000122245	4.97399	0.682734	3.91277
A0A1D5RLD1_MOUSE|A0A1D5RLD1_S718	KO_Late-KO_Uninfected	-0.794753	0.116154	19.4428	1.38931e-06	3.63993e-05	5.8572	0.794753	4.43891
A0A1D5RLD1_MOUSE|A0A1D5RLD1_S718	WT_Early-Wt_Uninfected	-0.903046	0.116154	19.4428	2.18797e-07	5.5942e-06	6.65996	0.903046	5.25226
A0A1D5RLD1_MOUSE|A0A1D5RLD1_S718	WT_Late-Wt_Uninfected	-0.861063	0.116154	19.4428	4.41785e-07	1.59333e-05	6.35479	0.861063	4.79769
A0A1D5RLD1_MOUSE|A0A1D5RLD1_S718	Infected-Uninfected	-0.810399	0.0728032	19.4428	7.01165e-10	2.07234e-08	9.15418	0.810399	7.68354
A0A1D5RLD1_MOUSE|A0A1D5RLD1_S718	KO-WT	0.00941133	0.0654452	19.4428	0.887135	0.925608	0.0520105	0.00941133	0.0335728
A0A1D5RLD1_MOUSE|A0A1D5RLD1_S718	Early-Uninfected	-0.79289	0.0821331	19.4428	7.45244e-09	1.57927e-07	8.1277	0.79289	6.80154
A0A1D5RLD1_MOUSE|A0A1D5RLD1_S718	Late-Uninfected	-0.827908	0.0821331	19.4428	3.67589e-09	1.35092e-07	8.43464	0.827908	6.86937
A0A1D5RLF9_MOUSE|A0A1D5RLF9_S47	KO_Early-WT_Early	0.361213	0.228118	8.44283	0.149999	0.327512	0.823911	0.361213	0.484773
A0A1D5RLF9_MOUSE|A0A1D5RLF9_S47	KO_Late-WT_Late	0.0926082	0.228118	8.44283	0.694863	0.818503	0.158101	0.0926082	0.0869799
A0A1D5RLF9_MOUSE|A0A1D5RLF9_S47	KO_Uninfected-WT_Uninfected	0.30462	0.279386	8.44283	0.305711	0.568377	0.514689	0.30462	0.245363
A0A1D5RLF9_MOUSE|A0A1D5RLF9_S47	KO_Early-KO_Uninfected	0.0600398	0.228118	8.44283	0.798709	0.86656	0.0976113	0.0600398	0.0622015
A0A1D5RLF9_MOUSE|A0A1D5RLF9_S47	KO_Late-KO_Uninfected	-0.07182	0.228118	8.44283	0.760526	0.846283	0.118886	0.07182	0.0724845
A0A1D5RLF9_MOUSE|A0A1D5RLF9_S47	WT_Early-Wt_Uninfected	0.00344668	0.279386	8.44283	0.990444	0.993405	0.00417025	0.00344668	0.0028736
A0A1D5RLF9_MOUSE|A0A1D5RLF9_S47	WT_Late-Wt_Uninfected	0.140192	0.279386	8.44283	0.628642	0.728044	0.201597	0.140192	0.137842
A0A1D5RLF9_MOUSE|A0A1D5RLF9_S47	Infected-Uninfected	0.0329645	0.161304	8.44283	0.842911	0.880855	0.0742184	0.0329645	0.0550957
A0A1D5RLF9_MOUSE|A0A1D5RLF9_S47	KO-WT	0.252814	0.142256	8.44283	0.11147	0.203041	0.952841	0.252814	0.692416
A0A1D5RLF9_MOUSE|A0A1D5RLF9_S47	Early-Uninfected	0.0317432	0.180343	8.44283	0.864431	0.897573	0.0632699	0.0317432	0.0469303
A0A1D5RLF9_MOUSE|A0A1D5RLF9_S47	Late-Uninfected	0.0341858	0.180343	8.44283	0.854132	0.893396	0.0684748	0.0341858	0.0489558
A0A1D5RLM2_MOUSE|A0A1D5RLM2_S122	KO_Early-WT_Early	-0.0373654	0.165639	8.44283	0.826891	0.905865	0.0825518	0.0373654	0.0429366
A0A1D5RLM2_MOUSE|A0A1D5RLM2_S122	KO_Late-WT_Late	-0.0678189	0.165639	8.44283	0.69241	0.816822	0.159636	0.0678189	0.0878726
A0A1D5RLM2_MOUSE|A0A1D5RLM2_S122	KO_Uninfected-WT_Uninfected	0.0416228	0.202866	8.44283	0.842297	0.929217	0.0745347	0.0416228	0.0318827
A0A1D5RLM2_MOUSE|A0A1D5RLM2_S122	KO_Early-KO_Uninfected	-0.336404	0.165639	8.44283	0.0748924	0.149844	1.12556	0.336404	0.82436
A0A1D5RLM2_MOUSE|A0A1D5RLM2_S122	KO_Late-KO_Uninfected	-0.78972	0.165639	8.44283	0.00121668	0.00706735	2.91482	0.78972	2.15074
A0A1D5RLM2_MOUSE|A0A1D5RLM2_S122	WT_Early-Wt_Uninfected	-0.257416	0.202866	8.44283	0.238342	0.351267	0.6228	0.257416	0.454363
A0A1D5RLM2_MOUSE|A0A1D5RLM2_S122	WT_Late-Wt_Uninfected	-0.680278	0.202866	8.44283	0.00928304	0.0308375	2.03231	0.680278	1.51092
A0A1D5RLM2_MOUSE|A0A1D5RLM2_S122	Infected-Uninfected	-0.515955	0.117125	8.44283	0.00199313	0.00569656	2.70046	0.515955	2.24439
A0A1D5RLM2_MOUSE|A0A1D5RLM2_S122	KO-WT	-0.0211872	0.103294	8.44283	0.842342	0.89408	0.0745116	0.0211872	0.0486238
A0A1D5RLM2_MOUSE|A0A1D5RLM2_S122	Early-Uninfected	-0.29691	0.130949	8.44283	0.0514363	0.0909225	1.28873	0.29691	1.04133
A0A1D5RLM2_MOUSE|A0A1D5RLM2_S122	Late-Uninfected	-0.734999	0.130949	8.44283	0.000414359	0.00191537	3.38262	0.734999	2.71775
A0A1D5RLM2_MOUSE|A0A1D5RLM2_S159	KO_Early-WT_Early	-0.22018	0.169212	8.44283	0.227571	0.422188	0.642882	0.22018	0.374495
A0A1D5RLM2_MOUSE|A0A1D5RLM2_S159	KO_Late-WT_Late	-0.144031	0.169212	8.44283	0.418151	0.606968	0.378667	0.144031	0.216835
A0A1D5RLM2_MOUSE|A0A1D5RLM2_S159	KO_Uninfected-WT_Uninfected	-0.0487506	0.207241	8.44283	0.819631	0.917568	0.0863814	0.0487506	0.0373616
A0A1D5RLM2_MOUSE|A0A1D5RLM2_S159	KO_Early-KO_Uninfected	-0.74989	0.169212	8.44283	0.00192127	0.00810149	2.71641	0.74989	2.09143
A0A1D5RLM2_MOUSE|A0A1D5RLM2_S159	KO_Late-KO_Uninfected	-0.902265	0.169212	8.44283	0.000586	0.00406651	3.2321	0.902265	2.39078
A0A1D5RLM2_MOUSE|A0A1D5RLM2_S159	WT_Early-Wt_Uninfected	-0.57846	0.207241	8.44283	0.0223206	0.0557406	1.6513	0.57846	1.25383
A0A1D5RLM2_MOUSE|A0A1D5RLM2_S159	WT_Late-Wt_Uninfected	-0.806985	0.207241	8.44283	0.00413022	0.0167535	2.38403	0.806985	1.7759
A0A1D5RLM2_MOUSE|A0A1D5RLM2_S159	Infected-Uninfected	-0.7594	0.119651	8.44283	0.000175873	0.000744299	3.7548	0.7594	3.12825
A0A1D5RLM2_MOUSE|A0A1D5RLM2_S159	KO-WT	-0.137654	0.105522	8.44283	0.226497	0.346985	0.644937	0.137654	0.45969
A0A1D5RLM2_MOUSE|A0A1D5RLM2_S159	Early-Uninfected	-0.664175	0.133774	8.44283	0.000937713	0.00313121	3.02793	0.664175	2.50429
A0A1D5RLM2_MOUSE|A0A1D5RLM2_S159	Late-Uninfected	-0.854625	0.133774	8.44283	0.000167841	0.000919479	3.7751	0.854625	3.03646
A0A1D5RLM2_MOUSE|A0A1D5RLM2_T212	KO_Early-WT_Early	-0.362091	0.113036	19.4428	0.0045797	0.0379065	2.33916	0.362091	1.42129
A0A1D5RLM2_MOUSE|A0A1D5RLM2_T212	KO_Late-WT_Late	-0.503155	0.113036	19.4428	0.000260479	0.00562056	3.58423	0.503155	2.25022
A0A1D5RLM2_MOUSE|A0A1D5RLM2_T212	KO_Uninfected-WT_Uninfected	0.225128	0.130523	19.4428	0.100421	0.311766	0.998174	0.225128	0.506171
A0A1D5RLM2_MOUSE|A0A1D5RLM2_T212	KO_Early-KO_Uninfected	-0.930649	0.122093	19.4428	2.93452e-07	6.93171e-06	6.53246	0.930649	5.15916
A0A1D5RLM2_MOUSE|A0A1D5RLM2_T212	KO_Late-KO_Uninfected	-0.51246	0.122093	19.4428	0.000467551	0.00341273	3.33017	0.51246	2.4669
A0A1D5RLM2_MOUSE|A0A1D5RLM2_T212	WT_Early-Wt_Uninfected	-0.343429	0.122093	19.4428	0.0109429	0.0316003	1.96087	0.343429	1.50031
A0A1D5RLM2_MOUSE|A0A1D5RLM2_T212	WT_Late-Wt_Uninfected	0.215823	0.122093	19.4428	0.0928027	0.176984	1.03244	0.215823	0.752065
A0A1D5RLM2_MOUSE|A0A1D5RLM2_T212	Infected-Uninfected	-0.392679	0.0765257	19.4428	5.53569e-05	0.000281002	4.25683	0.392679	3.55129
A0A1D5RLM2_MOUSE|A0A1D5RLM2_T212	KO-WT	-0.213372	0.0687915	19.4428	0.00575808	0.0222701	2.23972	0.213372	1.65228
A0A1D5RLM2_MOUSE|A0A1D5RLM2_T212	Early-Uninfected	-0.637039	0.0863326	19.4428	4.7263e-07	5.34806e-06	6.32548	0.637039	5.2718
A0A1D5RLM2_MOUSE|A0A1D5RLM2_T212	Late-Uninfected	-0.148319	0.0863326	19.4428	0.101684	0.168267	0.992748	0.148319	0.774001
A0A1N9PTV1_MOUSE|A0A1N9PTV1_S335	KO_Early-WT_Early	-0.0588154	0.132744	19.4428	0.662603	0.803528	0.178746	0.0588154	0.0949991
A0A1N9PTV1_MOUSE|A0A1N9PTV1_S335	KO_Late-WT_Late	0.164096	0.132744	19.4428	0.231118	0.420418	0.636165	0.164096	0.376319
A0A1N9PTV1_MOUSE|A0A1N9PTV1_S335	KO_Uninfected-WT_Uninfected	-0.129035	0.15328	19.4428	0.410122	0.659697	0.387087	0.129035	0.180656
A0A1N9PTV1_MOUSE|A0A1N9PTV1_S335	KO_Early-KO_Uninfected	-1.75894	0.14338	19.4428	1.32663e-10	1.35331e-08	9.87725	1.75894	7.8686
A0A1N9PTV1_MOUSE|A0A1N9PTV1_S335	KO_Late-KO_Uninfected	-0.309177	0.14338	19.4428	0.0437755	0.109055	1.35877	0.309177	0.962355
A0A1N9PTV1_MOUSE|A0A1N9PTV1_S335	WT_Early-Wt_Uninfected	-1.82916	0.14338	19.4428	6.71517e-11	7.86036e-09	10.1729	1.82916	8.10456
A0A1N9PTV1_MOUSE|A0A1N9PTV1_S335	WT_Late-Wt_Uninfected	-0.602307	0.14338	19.4428	0.000463826	0.0032553	3.33364	0.602307	2.48741
A0A1N9PTV1_MOUSE|A0A1N9PTV1_S335	Infected-Uninfected	-1.1249	0.0898682	19.4428	9.35338e-11	3.80335e-09	10.029	1.1249	8.41983
A0A1N9PTV1_MOUSE|A0A1N9PTV1_S335	KO-WT	-0.00791814	0.0807855	19.4428	0.922924	0.950552	0.0348339	0.00791814	0.0220242
A0A1N9PTV1_MOUSE|A0A1N9PTV1_S335	Early-Uninfected	-1.79405	0.101385	19.4428	1.88841e-13	2.11595e-11	12.7239	1.79405	10.6745
A0A1N9PTV1_MOUSE|A0A1N9PTV1_S335	Late-Uninfected	-0.455742	0.101385	19.4428	0.000235501	0.00121217	3.62801	0.455742	2.91644
A0A1Y7VIR0_MOUSE|A0A1Y7VIR0_S38	KO_Early-WT_Early	0.609429	0.18108	19.4428	0.0031691	0.0302032	2.49906	0.609429	1.51995
A0A1Y7VIR0_MOUSE|A0A1Y7VIR0_S38	KO_Late-WT_Late	0.389932	0.18108	19.4428	0.0440378	0.147624	1.35617	0.389932	0.830842
A0A1Y7VIR0_MOUSE|A0A1Y7VIR0_S38	KO_Uninfected-WT_Uninfected	0.725906	0.209093	19.4428	0.00248692	0.0407264	2.60434	0.725906	1.39012
A0A1Y7VIR0_MOUSE|A0A1Y7VIR0_S38	KO_Early-KO_Uninfected	-0.376495	0.195589	19.4428	0.0689946	0.140634	1.16119	0.376495	0.85191
A0A1Y7VIR0_MOUSE|A0A1Y7VIR0_S38	KO_Late-KO_Uninfected	-0.155287	0.195589	19.4428	0.436811	0.586371	0.359707	0.155287	0.231828
A0A1Y7VIR0_MOUSE|A0A1Y7VIR0_S38	WT_Early-Wt_Uninfected	-0.260019	0.195589	19.4428	0.199099	0.306335	0.70093	0.260019	0.513803
A0A1Y7VIR0_MOUSE|A0A1Y7VIR0_S38	WT_Late-Wt_Uninfected	0.180688	0.195589	19.4428	0.366907	0.494109	0.435444	0.180688	0.306177
A0A1Y7VIR0_MOUSE|A0A1Y7VIR0_S38	Infected-Uninfected	-0.152778	0.122592	19.4428	0.227485	0.305873	0.643048	0.152778	0.514459
A0A1Y7VIR0_MOUSE|A0A1Y7VIR0_S38	KO-WT	0.575089	0.110202	19.4428	4.55105e-05	0.0006587	4.34189	0.575089	3.18131
A0A1Y7VIR0_MOUSE|A0A1Y7VIR0_S38	Early-Uninfected	-0.318257	0.138302	19.4428	0.0325977	0.0619586	1.48681	0.318257	1.2079
A0A1Y7VIR0_MOUSE|A0A1Y7VIR0_S38	Late-Uninfected	0.0127004	0.138302	19.4428	0.927772	0.948518	0.0325588	0.0127004	0.0229545
A0A1Y7VNP1_MOUSE|A0A1Y7VNP1_S418_S421	KO_Early-WT_Early	-0.335806	0.0864726	19.4429	0.000964919	0.0140388	3.01551	0.335806	1.85267
A0A1Y7VNP1_MOUSE|A0A1Y7VNP1_S418_S421	KO_Late-WT_Late	-0.3618	0.0864726	19.4429	0.00048214	0.00833581	3.31683	0.3618	2.07905
A0A1Y7VNP1_MOUSE|A0A1Y7VNP1_S418_S421	KO_Uninfected-WT_Uninfected	-0.152338	0.09985	19.4429	0.143195	0.377206	0.844073	0.152338	0.423421
A0A1Y7VNP1_MOUSE|A0A1Y7VNP1_S418_S421	KO_Early-KO_Uninfected	-0.787334	0.0934011	19.4429	6.40079e-08	2.10059e-06	7.19377	0.787334	5.67766
A0A1Y7VNP1_MOUSE|A0A1Y7VNP1_S418_S421	KO_Late-KO_Uninfected	-0.344162	0.0934011	19.4429	0.00152504	0.00841443	2.81672	0.344162	2.07498
A0A1Y7VNP1_MOUSE|A0A1Y7VNP1_S418_S421	WT_Early-Wt_Uninfected	-0.603865	0.0934011	19.4429	3.03234e-06	4.5858e-05	5.51822	0.603865	4.33859
A0A1Y7VNP1_MOUSE|A0A1Y7VNP1_S418_S421	WT_Late-Wt_Uninfected	-0.1347	0.0934011	19.4429	0.165172	0.273191	0.782065	0.1347	0.563534
A0A1Y7VNP1_MOUSE|A0A1Y7VNP1_S418_S421	Infected-Uninfected	-0.467515	0.0585422	19.4429	1.46251e-07	1.94367e-06	6.8349	0.467515	5.71138
A0A1Y7VNP1_MOUSE|A0A1Y7VNP1_S418_S421	KO-WT	-0.283315	0.0526256	19.4429	3.14721e-05	0.000498433	4.50207	0.283315	3.30239
A0A1Y7VNP1_MOUSE|A0A1Y7VNP1_S418_S421	Early-Uninfected	-0.695599	0.0660446	19.4429	1.77643e-09	4.69919e-08	8.75045	0.695599	7.32798
A0A1Y7VNP1_MOUSE|A0A1Y7VNP1_S418_S421	Late-Uninfected	-0.239431	0.0660446	19.4429	0.00174857	0.00610487	2.75732	0.239431	2.21432
A0AUN0_MOUSE|A0AUN0_S768	KO_Early-WT_Early	0.407604	0.129781	19.4428	0.00527461	0.0413763	2.27781	0.407604	1.38325
A0AUN0_MOUSE|A0AUN0_S768	KO_Late-WT_Late	0.24343	0.129781	19.4428	0.075794	0.206785	1.12037	0.24343	0.684481
A0AUN0_MOUSE|A0AUN0_S768	KO_Uninfected-WT_Uninfected	0.155416	0.149858	19.4428	0.312421	0.574783	0.505259	0.155416	0.240496
A0AUN0_MOUSE|A0AUN0_S768	KO_Early-KO_Uninfected	1.75425	0.140179	19.4428	9.38987e-11	1.04443e-08	10.0273	1.75425	7.98112
A0AUN0_MOUSE|A0AUN0_S768	KO_Late-KO_Uninfected	1.48268	0.140179	19.4428	1.6551e-09	1.86228e-07	8.78118	1.48268	6.72995
A0AUN0_MOUSE|A0AUN0_S768	WT_Early-Wt_Uninfected	1.50206	0.140179	19.4428	1.33186e-09	9.17381e-08	8.87554	1.50206	7.03745
A0AUN0_MOUSE|A0AUN0_S768	WT_Late-Wt_Uninfected	1.39467	0.140179	19.4428	4.55671e-09	4.76658e-07	8.34135	1.39467	6.32179
A0AUN0_MOUSE|A0AUN0_S768	Infected-Uninfected	1.53342	0.0878619	19.4428	2.43328e-13	2.85315e-11	12.6138	1.53342	10.5447
A0AUN0_MOUSE|A0AUN0_S768	KO-WT	0.268816	0.078982	19.4428	0.00290614	0.0134692	2.53668	0.268816	1.87066
A0AUN0_MOUSE|A0AUN0_S768	Early-Uninfected	1.62816	0.0991216	19.4428	7.36399e-13	6.72657e-11	12.1329	1.62816	10.1722
A0AUN0_MOUSE|A0AUN0_S768	Late-Uninfected	1.43867	0.0991216	19.4428	6.86428e-12	8.12467e-10	11.1634	1.43867	9.09019
A0JLR7_MOUSE|A0JLR7_S132	KO_Early-WT_Early	-0.112026	0.186748	19.4428	0.555514	0.725154	0.255305	0.112026	0.13957
A0JLR7_MOUSE|A0JLR7_S132	KO_Late-WT_Late	-0.454401	0.186748	19.4428	0.0247648	0.101988	1.60617	0.454401	0.991452
A0JLR7_MOUSE|A0JLR7_S132	KO_Uninfected-WT_Uninfected	-0.59361	0.215638	19.4428	0.0124807	0.0986051	1.90376	0.59361	1.0061
A0JLR7_MOUSE|A0JLR7_S132	KO_Early-KO_Uninfected	-0.857637	0.201711	19.4428	0.000412318	0.00235221	3.38477	0.857637	2.62852
A0JLR7_MOUSE|A0JLR7_S132	KO_Late-KO_Uninfected	-0.844101	0.201711	19.4428	0.000481336	0.00348889	3.31755	0.844101	2.45731
A0JLR7_MOUSE|A0JLR7_S132	WT_Early-Wt_Uninfected	-1.33922	0.201711	19.4428	2.10999e-06	3.4132e-05	5.67572	1.33922	4.46684
A0JLR7_MOUSE|A0JLR7_S132	WT_Late-Wt_Uninfected	-0.983311	0.201711	19.4428	9.88837e-05	0.00102711	4.00488	0.983311	2.98838
A0JLR7_MOUSE|A0JLR7_S132	Infected-Uninfected	-1.00607	0.126429	19.4428	1.54326e-07	2.03596e-06	6.81156	1.00607	5.69123
A0JLR7_MOUSE|A0JLR7_S132	KO-WT	-0.386679	0.113651	19.4428	0.00291403	0.0134983	2.53551	0.386679	1.86972
A0JLR7_MOUSE|A0JLR7_S132	Early-Uninfected	-1.09843	0.142631	19.4428	2.51996e-07	3.14353e-06	6.59861	1.09843	5.50258
A0JLR7_MOUSE|A0JLR7_S132	Late-Uninfected	-0.913706	0.142631	19.4428	3.43377e-06	3.88723e-05	5.46423	0.913706	4.41036
A0JLR7_MOUSE|A0JLR7_S298	KO_Early-WT_Early	0.278099	0.158551	19.4428	0.0951795	0.24795	1.02146	0.278099	0.605635
A0JLR7_MOUSE|A0JLR7_S298	KO_Late-WT_Late	0.380888	0.158551	19.4428	0.0264235	0.106201	1.57801	0.380888	0.97387
A0JLR7_MOUSE|A0JLR7_S298	KO_Uninfected-WT_Uninfected	0.306143	0.183079	19.4428	0.110503	0.328846	0.956628	0.306143	0.483008
A0JLR7_MOUSE|A0JLR7_S298	KO_Early-KO_Uninfected	-0.146556	0.171255	19.4428	0.402544	0.538491	0.395187	0.146556	0.268821
A0JLR7_MOUSE|A0JLR7_S298	KO_Late-KO_Uninfected	-0.219066	0.171255	19.4428	0.215889	0.355476	0.665769	0.219066	0.449189
A0JLR7_MOUSE|A0JLR7_S298	WT_Early-Wt_Uninfected	-0.118512	0.171255	19.4428	0.497105	0.609374	0.303552	0.118512	0.215116
A0JLR7_MOUSE|A0JLR7_S298	WT_Late-Wt_Uninfected	-0.293811	0.171255	19.4428	0.102122	0.190186	0.990881	0.293811	0.720821
A0JLR7_MOUSE|A0JLR7_S298	Infected-Uninfected	-0.194486	0.10734	19.4428	0.0854804	0.135683	1.06813	0.194486	0.867476
A0JLR7_MOUSE|A0JLR7_S298	KO-WT	0.32171	0.0964911	19.4428	0.00340426	0.0151272	2.46798	0.32171	1.82024
A0JLR7_MOUSE|A0JLR7_S298	Early-Uninfected	-0.132534	0.121095	19.4428	0.287127	0.376274	0.541926	0.132534	0.424496
A0JLR7_MOUSE|A0JLR7_S298	Late-Uninfected	-0.256438	0.121095	19.4428	0.0473028	0.0903722	1.32511	0.256438	1.04397
A0JLR7_MOUSE|A0JLR7_S444	KO_Early-WT_Early	-0.695018	0.476956	19.4428	0.161025	0.341526	0.793107	0.695018	0.466577
A0JLR7_MOUSE|A0JLR7_S444	KO_Late-WT_Late	-0.591885	0.476956	19.4428	0.229385	0.418228	0.639435	0.591885	0.378587
A0JLR7_MOUSE|A0JLR7_S444	KO_Uninfected-WT_Uninfected	0.139439	0.550742	19.4428	0.802784	0.908757	0.0954012	0.139439	0.0415521
A0JLR7_MOUSE|A0JLR7_S444	KO_Early-KO_Uninfected	0.848083	0.515172	19.4428	0.115789	0.209863	0.936332	0.848083	0.678065
A0JLR7_MOUSE|A0JLR7_S444	KO_Late-KO_Uninfected	0.850659	0.515172	19.4428	0.114755	0.223393	0.940227	0.850659	0.650931
A0JLR7_MOUSE|A0JLR7_S444	WT_Early-Wt_Uninfected	1.68254	0.515172	19.4428	0.00397399	0.0140946	2.40077	1.68254	1.85095
A0JLR7_MOUSE|A0JLR7_S444	WT_Late-Wt_Uninfected	1.58198	0.515172	19.4428	0.00617216	0.0227619	2.20956	1.58198	1.64279
A0JLR7_MOUSE|A0JLR7_S444	Infected-Uninfected	1.24082	0.322901	19.4428	0.00105984	0.00333828	2.97476	1.24082	2.47648
A0JLR7_MOUSE|A0JLR7_S444	KO-WT	-0.382488	0.290266	19.4428	0.202916	0.318939	0.692684	0.382488	0.496293
A0JLR7_MOUSE|A0JLR7_S444	Early-Uninfected	1.26531	0.364282	19.4428	0.00247697	0.00711808	2.60608	1.26531	2.14764
A0JLR7_MOUSE|A0JLR7_S444	Late-Uninfected	1.21632	0.364282	19.4428	0.00336678	0.0104596	2.47279	1.21632	1.98048
A0JLR7_MOUSE|A0JLR7_S552	KO_Early-WT_Early	-0.0244307	0.085313	19.4429	0.777627	0.876652	0.109228	0.0244307	0.057173
A0JLR7_MOUSE|A0JLR7_S552	KO_Late-WT_Late	0.0537003	0.085313	19.4429	0.536381	0.704226	0.270526	0.0537003	0.152288
A0JLR7_MOUSE|A0JLR7_S552	KO_Uninfected-WT_Uninfected	0.28717	0.098511	19.4429	0.00873313	0.0814586	2.05883	0.28717	1.08906
A0JLR7_MOUSE|A0JLR7_S552	KO_Early-KO_Uninfected	-0.422184	0.0921486	19.4429	0.000193152	0.00126875	3.7141	0.422184	2.89662
A0JLR7_MOUSE|A0JLR7_S552	KO_Late-KO_Uninfected	-0.361343	0.0921486	19.4429	0.000884065	0.00555389	3.05352	0.361343	2.2554
A0JLR7_MOUSE|A0JLR7_S552	WT_Early-Wt_Uninfected	-0.110584	0.0921486	19.4429	0.244536	0.358024	0.611658	0.110584	0.446088
A0JLR7_MOUSE|A0JLR7_S552	WT_Late-Wt_Uninfected	-0.127874	0.0921486	19.4429	0.180931	0.292972	0.742486	0.127874	0.533174
A0JLR7_MOUSE|A0JLR7_S552	Infected-Uninfected	-0.255496	0.0577572	19.4429	0.000277581	0.00108801	3.55661	0.255496	2.96337
A0JLR7_MOUSE|A0JLR7_S552	KO-WT	0.10548	0.0519199	19.4429	0.0560901	0.120882	1.25111	0.10548	0.917638
A0JLR7_MOUSE|A0JLR7_S552	Early-Uninfected	-0.266384	0.0651589	19.4429	0.000601386	0.00214753	3.22085	0.266384	2.66806
A0JLR7_MOUSE|A0JLR7_S552	Late-Uninfected	-0.244608	0.0651589	19.4429	0.00130024	0.00480299	2.88598	0.244608	2.31849
A0JLR7_MOUSE|A0JLR7_S589	KO_Early-WT_Early	-2.06553	0.766033	18.4428	0.0145515	0.0770927	1.83709	2.06553	1.11299
A0JLR7_MOUSE|A0JLR7_S589	KO_Late-WT_Late	-2.50476	0.766033	18.4428	0.00415218	0.0328681	2.38172	2.50476	1.48323
A0JLR7_MOUSE|A0JLR7_S589	KO_Uninfected-WT_Uninfected	-1.47024	0.988944	18.4428	0.153997	0.39315	0.812488	1.47024	0.405441
A0JLR7_MOUSE|A0JLR7_S589	KO_Early-KO_Uninfected	1.6074	0.938194	18.4428	0.103419	0.192311	0.985398	1.6074	0.715996
A0JLR7_MOUSE|A0JLR7_S589	KO_Late-KO_Uninfected	0.310059	0.938194	18.4428	0.744759	0.835079	0.127984	0.310059	0.0782725
A0JLR7_MOUSE|A0JLR7_S589	WT_Early-Wt_Uninfected	2.20269	0.82741	18.4428	0.0156552	0.0423237	1.80534	2.20269	1.37342
A0JLR7_MOUSE|A0JLR7_S589	WT_Late-Wt_Uninfected	1.34458	0.82741	18.4428	0.12112	0.216401	0.916786	1.34458	0.66474
A0JLR7_MOUSE|A0JLR7_S589	Infected-Uninfected	1.36618	0.563785	18.4428	0.0258694	0.0495814	1.58721	1.36618	1.30468
A0JLR7_MOUSE|A0JLR7_S589	KO-WT	-2.01351	0.488947	18.4428	0.000617619	0.00430286	3.20928	2.01351	2.36624
A0JLR7_MOUSE|A0JLR7_S589	Early-Uninfected	1.90504	0.625463	18.4428	0.00681567	0.0166841	2.16649	1.90504	1.7777
A0JLR7_MOUSE|A0JLR7_S589	Late-Uninfected	0.827318	0.625463	18.4428	0.202093	0.291993	0.694448	0.827318	0.534628
A0JLR7_MOUSE|A0JLR7_S621	KO_Early-WT_Early	-0.239305	0.101817	19.4428	0.0294455	0.11922	1.53098	0.239305	0.923652
A0JLR7_MOUSE|A0JLR7_S621	KO_Late-WT_Late	-0.127804	0.101817	19.4428	0.224274	0.412488	0.649222	0.127804	0.384588
A0JLR7_MOUSE|A0JLR7_S621	KO_Uninfected-WT_Uninfected	0.227365	0.117568	19.4428	0.0678169	0.251573	1.16866	0.227365	0.599335
A0JLR7_MOUSE|A0JLR7_S621	KO_Early-KO_Uninfected	-0.182873	0.109975	19.4428	0.112378	0.205021	0.949319	0.182873	0.688201
A0JLR7_MOUSE|A0JLR7_S621	KO_Late-KO_Uninfected	-0.244569	0.109975	19.4428	0.0381884	0.0981903	1.41807	0.244569	1.00793
A0JLR7_MOUSE|A0JLR7_S621	WT_Early-Wt_Uninfected	0.283797	0.109975	19.4428	0.0181156	0.0473897	1.74195	0.283797	1.32432
A0JLR7_MOUSE|A0JLR7_S621	WT_Late-Wt_Uninfected	0.110599	0.109975	19.4428	0.326924	0.453342	0.485553	0.110599	0.343574
A0JLR7_MOUSE|A0JLR7_S621	Infected-Uninfected	-0.00826133	0.0689305	19.4428	0.905832	0.929766	0.0429525	0.00826133	0.0316262
A0JLR7_MOUSE|A0JLR7_S621	KO-WT	-0.0465815	0.0619639	19.4428	0.461204	0.585938	0.336107	0.0465815	0.232149
A0JLR7_MOUSE|A0JLR7_S621	Early-Uninfected	0.0504621	0.0777641	19.4428	0.523986	0.608537	0.28068	0.0504621	0.215713
A0JLR7_MOUSE|A0JLR7_S621	Late-Uninfected	-0.0669848	0.0777641	19.4428	0.399525	0.500941	0.398456	0.0669848	0.300213
A0JLR7_MOUSE|A0JLR7_S741_S743	KO_Early-WT_Early	0.077331	0.128293	8.44283	0.562499	0.730791	0.249878	0.077331	0.136207
A0JLR7_MOUSE|A0JLR7_S741_S743	KO_Late-WT_Late	0.0661026	0.128293	8.44283	0.619597	0.766349	0.207891	0.0661026	0.115573
A0JLR7_MOUSE|A0JLR7_S741_S743	KO_Uninfected-WT_Uninfected	0.0997669	0.157126	8.44283	0.542283	0.758434	0.265774	0.0997669	0.120082
A0JLR7_MOUSE|A0JLR7_S741_S743	KO_Early-KO_Uninfected	-0.210474	0.128293	8.44283	0.13753	0.23963	0.861603	0.210474	0.620458
A0JLR7_MOUSE|A0JLR7_S741_S743	KO_Late-KO_Uninfected	-0.139812	0.128293	8.44283	0.305929	0.456981	0.514379	0.139812	0.340102
A0JLR7_MOUSE|A0JLR7_S741_S743	WT_Early-Wt_Uninfected	-0.188038	0.157126	8.44283	0.263931	0.379626	0.57851	0.188038	0.420644
A0JLR7_MOUSE|A0JLR7_S741_S743	WT_Late-Wt_Uninfected	-0.106148	0.157126	8.44283	0.517392	0.634563	0.28618	0.106148	0.197525
A0JLR7_MOUSE|A0JLR7_S741_S743	Infected-Uninfected	-0.161118	0.0907166	8.44283	0.111661	0.169574	0.952097	0.161118	0.770641
A0JLR7_MOUSE|A0JLR7_S741_S743	KO-WT	0.0810668	0.0800045	8.44283	0.339083	0.4672	0.469694	0.0810668	0.330497
A0JLR7_MOUSE|A0JLR7_S741_S743	Early-Uninfected	-0.199256	0.101424	8.44283	0.083161	0.135956	1.08008	0.199256	0.866603
A0JLR7_MOUSE|A0JLR7_S741_S743	Late-Uninfected	-0.12298	0.101424	8.44283	0.258144	0.354992	0.588138	0.12298	0.449781
A0JLR7_MOUSE|A0JLR7_S744	KO_Early-WT_Early	0.408733	0.18863	19.4428	0.0428598	0.150203	1.36795	0.408733	0.823322
A0JLR7_MOUSE|A0JLR7_S744	KO_Late-WT_Late	0.402647	0.18863	19.4428	0.0457287	0.151432	1.33981	0.402647	0.819783
A0JLR7_MOUSE|A0JLR7_S744	KO_Uninfected-WT_Uninfected	-0.00857955	0.217811	19.4428	0.968981	0.988266	0.0136846	0.00857955	0.00512617
A0JLR7_MOUSE|A0JLR7_S744	KO_Early-KO_Uninfected	0.908625	0.203744	19.4428	0.000255524	0.00159735	3.59257	0.908625	2.7966
A0JLR7_MOUSE|A0JLR7_S744	KO_Late-KO_Uninfected	0.441955	0.203744	19.4428	0.0426597	0.106793	1.36998	0.441955	0.971456
A0JLR7_MOUSE|A0JLR7_S744	WT_Early-Wt_Uninfected	0.491312	0.203744	19.4428	0.0259243	0.0628837	1.58629	0.491312	1.20146
A0JLR7_MOUSE|A0JLR7_S744	WT_Late-Wt_Uninfected	0.0307285	0.203744	19.4428	0.881672	0.921821	0.0546929	0.0307285	0.0353533
A0JLR7_MOUSE|A0JLR7_S744	Infected-Uninfected	0.468155	0.127703	19.4428	0.00159249	0.00471057	2.79792	0.468155	2.32693
A0JLR7_MOUSE|A0JLR7_S744	KO-WT	0.2676	0.114797	19.4428	0.0306453	0.0767595	1.51364	0.2676	1.11487
A0JLR7_MOUSE|A0JLR7_S744	Early-Uninfected	0.699968	0.144069	19.4428	0.000102611	0.0004839	3.98881	0.699968	3.31524
A0JLR7_MOUSE|A0JLR7_S744	Late-Uninfected	0.236342	0.144069	19.4428	0.116984	0.188803	0.931873	0.236342	0.723992
A0JLR7_MOUSE|A0JLR7_S957	KO_Early-WT_Early	0.245553	0.0981172	19.4428	0.0213885	0.0969521	1.66982	0.245553	1.01344
A0JLR7_MOUSE|A0JLR7_S957	KO_Late-WT_Late	0.337415	0.0981172	19.4428	0.00268057	0.0251517	2.57177	0.337415	1.59943
A0JLR7_MOUSE|A0JLR7_S957	KO_Uninfected-WT_Uninfected	0.113586	0.113296	19.4428	0.328388	0.590126	0.483613	0.113586	0.229055
A0JLR7_MOUSE|A0JLR7_S957	KO_Early-KO_Uninfected	0.246096	0.105979	19.4428	0.031218	0.0755976	1.50559	0.246096	1.12149
A0JLR7_MOUSE|A0JLR7_S957	KO_Late-KO_Uninfected	0.243762	0.105979	19.4428	0.0326697	0.08729	1.48586	0.243762	1.05904
A0JLR7_MOUSE|A0JLR7_S957	WT_Early-Wt_Uninfected	0.114129	0.105979	19.4428	0.294702	0.412839	0.530616	0.114129	0.384219
A0JLR7_MOUSE|A0JLR7_S957	WT_Late-Wt_Uninfected	0.0199331	0.105979	19.4428	0.852758	0.901679	0.069174	0.0199331	0.0449479
A0JLR7_MOUSE|A0JLR7_S957	Infected-Uninfected	0.15598	0.0664256	19.4428	0.0295776	0.0554739	1.52904	0.15598	1.25591
A0JLR7_MOUSE|A0JLR7_S957	KO-WT	0.232184	0.0597122	19.4428	0.000953833	0.00591902	3.02053	0.232184	2.22775
A0JLR7_MOUSE|A0JLR7_S957	Early-Uninfected	0.180113	0.0749382	19.4428	0.0263586	0.0519608	1.57908	0.180113	1.28432
A0JLR7_MOUSE|A0JLR7_S957	Late-Uninfected	0.131847	0.0749382	19.4428	0.0942343	0.158256	1.02579	0.131847	0.80064
A0JLR7_MOUSE|A0JLR7_S966	KO_Early-WT_Early	0.383661	0.161394	8.44283	0.0431676	0.150761	1.36484	0.383661	0.821712
A0JLR7_MOUSE|A0JLR7_S966	KO_Late-WT_Late	0.44596	0.161394	8.44283	0.0233359	0.0983032	1.63198	0.44596	1.00743
A0JLR7_MOUSE|A0JLR7_S966	KO_Uninfected-WT_Uninfected	-0.105694	0.197667	8.44283	0.606643	0.799186	0.217067	0.105694	0.0973521
A0JLR7_MOUSE|A0JLR7_S966	KO_Early-KO_Uninfected	1.04646	0.161394	8.44283	0.000150994	0.00104522	3.82104	1.04646	2.98079
A0JLR7_MOUSE|A0JLR7_S966	KO_Late-KO_Uninfected	0.696895	0.161394	8.44283	0.00225084	0.0113053	2.64766	0.696895	1.94672
A0JLR7_MOUSE|A0JLR7_S966	WT_Early-Wt_Uninfected	0.5571	0.197667	8.44283	0.0213816	0.0539407	1.66996	0.5571	1.26808
A0JLR7_MOUSE|A0JLR7_S966	WT_Late-Wt_Uninfected	0.145241	0.197667	8.44283	0.482383	0.604327	0.316608	0.145241	0.218728
A0JLR7_MOUSE|A0JLR7_S966	Infected-Uninfected	0.611423	0.114123	8.44283	0.000567638	0.0019758	3.24593	0.611423	2.70426
A0JLR7_MOUSE|A0JLR7_S966	KO-WT	0.241309	0.100647	8.44283	0.0417832	0.0967028	1.379	0.241309	1.01456
A0JLR7_MOUSE|A0JLR7_S966	Early-Uninfected	0.801778	0.127593	8.44283	0.000188779	0.00081203	3.72405	0.801778	3.09043
A0JLR7_MOUSE|A0JLR7_S966	Late-Uninfected	0.421068	0.127593	8.44283	0.0100739	0.0255097	1.9968	0.421068	1.5933
A0JLR7_MOUSE|A0JLR7_T698	KO_Early-WT_Early	0.49327	0.139375	8.44283	0.00699766	0.0490887	2.15505	0.49327	1.30902
A0JLR7_MOUSE|A0JLR7_T698	KO_Late-WT_Late	0.217541	0.139375	8.44283	0.155213	0.327635	0.809073	0.217541	0.484609
A0JLR7_MOUSE|A0JLR7_T698	KO_Uninfected-WT_Uninfected	-0.0935397	0.170699	8.44283	0.597892	0.79359	0.223377	0.0935397	0.100404
A0JLR7_MOUSE|A0JLR7_T698	KO_Early-KO_Uninfected	0.465993	0.139375	8.44283	0.00942498	0.0288916	2.02572	0.465993	1.53923
A0JLR7_MOUSE|A0JLR7_T698	KO_Late-KO_Uninfected	0.00010217	0.139375	8.44283	0.999432	0.999621	0.000246693	0.00010217	0.000164464
A0JLR7_MOUSE|A0JLR7_T698	WT_Early-Wt_Uninfected	-0.120816	0.170699	8.44283	0.498158	0.61032	0.302633	0.120816	0.214442
A0JLR7_MOUSE|A0JLR7_T698	WT_Late-Wt_Uninfected	-0.310979	0.170699	8.44283	0.104005	0.192706	0.982948	0.310979	0.715105
A0JLR7_MOUSE|A0JLR7_T698	Infected-Uninfected	0.00857522	0.0985533	8.44283	0.932691	0.950141	0.0302621	0.00857522	0.0222121
A0JLR7_MOUSE|A0JLR7_T698	KO-WT	0.205757	0.0869159	8.44283	0.0438525	0.100177	1.35801	0.205757	0.999232
A0JLR7_MOUSE|A0JLR7_T698	Early-Uninfected	0.172589	0.110186	8.44283	0.153927	0.226357	0.812684	0.172589	0.645206
A0JLR7_MOUSE|A0JLR7_T698	Late-Uninfected	-0.155438	0.110186	8.44283	0.194102	0.282714	0.711971	0.155438	0.548653
A16L1_MOUSE|Q8C0J2_S287	KO_Early-WT_Early	-2.93545	0.193854	19.4428	3.20973e-12	1.61847e-08	11.4935	2.93545	7.79089
A16L1_MOUSE|Q8C0J2_S287	KO_Late-WT_Late	-2.86066	0.193854	19.4428	5.1023e-12	2.14399e-08	11.2922	2.86066	7.66878
A16L1_MOUSE|Q8C0J2_S287	KO_Uninfected-WT_Uninfected	-2.78373	0.223843	19.4428	1.04724e-10	1.58886e-07	9.97995	2.78373	6.79892
A16L1_MOUSE|Q8C0J2_S287	KO_Early-KO_Uninfected	-0.519545	0.209386	19.4428	0.0223792	0.0578626	1.65016	0.519545	1.2376
A16L1_MOUSE|Q8C0J2_S287	KO_Late-KO_Uninfected	-0.0758222	0.209386	19.4428	0.721171	0.819052	0.141962	0.0758222	0.0866885
A16L1_MOUSE|Q8C0J2_S287	WT_Early-Wt_Uninfected	-0.367825	0.209386	19.4428	0.0947113	0.172381	1.0236	0.367825	0.76351
A16L1_MOUSE|Q8C0J2_S287	WT_Late-Wt_Uninfected	0.00110387	0.209386	19.4428	0.995847	0.997311	0.00180723	0.00110387	0.00116936
A16L1_MOUSE|Q8C0J2_S287	Infected-Uninfected	-0.240522	0.13124	19.4428	0.0822092	0.131208	1.08508	0.240522	0.882041
A16L1_MOUSE|Q8C0J2_S287	KO-WT	-2.85995	0.117976	19.4428	5.36617e-16	1.5033e-12	15.2703	2.85995	11.823
A16L1_MOUSE|Q8C0J2_S287	Early-Uninfected	-0.443685	0.148058	19.4428	0.00728454	0.0176333	2.1376	0.443685	1.75367
A16L1_MOUSE|Q8C0J2_S287	Late-Uninfected	-0.0373591	0.148058	19.4428	0.803437	0.854516	0.0950484	0.0373591	0.0682799
A16L1_MOUSE|Q8C0J2_S289	KO_Early-WT_Early	-1.70873	0.119986	19.4428	9.63464e-12	3.03636e-08	11.0162	1.70873	7.51765
A16L1_MOUSE|Q8C0J2_S289	KO_Late-WT_Late	-1.94718	0.119986	19.4428	9.17495e-13	8.86537e-09	12.0374	1.94718	8.0523
A16L1_MOUSE|Q8C0J2_S289	KO_Uninfected-WT_Uninfected	-1.7001	0.138548	19.4428	1.32066e-10	1.84915e-07	9.87921	1.7001	6.73303
A16L1_MOUSE|Q8C0J2_S289	KO_Early-KO_Uninfected	-0.478309	0.1296	19.4428	0.00150447	0.00664775	2.82262	0.478309	2.17733
A16L1_MOUSE|Q8C0J2_S289	KO_Late-KO_Uninfected	-0.296842	0.1296	19.4428	0.0333249	0.0885712	1.47723	0.296842	1.05271
A16L1_MOUSE|Q8C0J2_S289	WT_Early-Wt_Uninfected	-0.469678	0.1296	19.4428	0.00175349	0.00733701	2.7561	0.469678	2.13448
A16L1_MOUSE|Q8C0J2_S289	WT_Late-Wt_Uninfected	-0.0497602	0.1296	19.4428	0.70518	0.790185	0.1517	0.0497602	0.102271
A16L1_MOUSE|Q8C0J2_S289	Infected-Uninfected	-0.323647	0.0812308	19.4428	0.00076445	0.00253987	3.11665	0.323647	2.59519
A16L1_MOUSE|Q8C0J2_S289	KO-WT	-1.78534	0.0730211	19.4428	4.56834e-16	1.43977e-12	15.3402	1.78534	11.8417
A16L1_MOUSE|Q8C0J2_S289	Early-Uninfected	-0.473993	0.0916407	19.4428	5.04849e-05	0.000266215	4.29684	0.473993	3.57477
A16L1_MOUSE|Q8C0J2_S289	Late-Uninfected	-0.173301	0.0916407	19.4428	0.0736074	0.129616	1.13308	0.173301	0.88734
A16L2_MOUSE|Q6KAU8_S238	KO_Early-WT_Early	-0.587203	0.103452	19.4428	1.649e-05	0.000951363	4.78278	0.587203	3.02165
A16L2_MOUSE|Q6KAU8_S238	KO_Late-WT_Late	-0.639518	0.103452	19.4428	5.52181e-06	0.000455105	5.25792	0.639518	3.34189
A16L2_MOUSE|Q6KAU8_S238	KO_Uninfected-WT_Uninfected	-0.285495	0.119457	19.4428	0.027115	0.150524	1.56679	0.285495	0.822395
A16L2_MOUSE|Q6KAU8_S238	KO_Early-KO_Uninfected	-0.0734371	0.111741	19.4428	0.518754	0.643724	0.285039	0.0734371	0.191301
A16L2_MOUSE|Q6KAU8_S238	KO_Late-KO_Uninfected	-0.124926	0.111741	19.4428	0.277195	0.425378	0.557215	0.124926	0.371225
A16L2_MOUSE|Q6KAU8_S238	WT_Early-Wt_Uninfected	0.228271	0.111741	19.4428	0.0548628	0.112547	1.26072	0.228271	0.948666
A16L2_MOUSE|Q6KAU8_S238	WT_Late-Wt_Uninfected	0.229097	0.111741	19.4428	0.0540694	0.117437	1.26705	0.229097	0.930195
A16L2_MOUSE|Q6KAU8_S238	Infected-Uninfected	0.0647512	0.0700377	19.4428	0.366549	0.452971	0.435868	0.0647512	0.343929
A16L2_MOUSE|Q6KAU8_S238	KO-WT	-0.504072	0.0629592	19.4428	1.40722e-07	7.56509e-06	6.85164	0.504072	5.12119
A16L2_MOUSE|Q6KAU8_S238	Early-Uninfected	0.0774168	0.0790131	19.4428	0.339222	0.431098	0.469516	0.0774168	0.365424
A16L2_MOUSE|Q6KAU8_S238	Late-Uninfected	0.0520856	0.0790131	19.4428	0.517499	0.612605	0.286091	0.0520856	0.212819
A16L2_MOUSE|Q6KAU8_S240	KO_Early-WT_Early	-0.20436	0.127664	8.44283	0.146116	0.322497	0.835302	0.20436	0.491475
A16L2_MOUSE|Q6KAU8_S240	KO_Late-WT_Late	-0.0247011	0.127664	8.44283	0.851153	0.914835	0.0699922	0.0247011	0.0386574
A16L2_MOUSE|Q6KAU8_S240	KO_Uninfected-WT_Uninfected	-0.0599273	0.156356	8.44283	0.710987	0.860925	0.148138	0.0599273	0.0650348
A16L2_MOUSE|Q6KAU8_S240	KO_Early-KO_Uninfected	0.543335	0.127664	8.44283	0.00245575	0.009881	2.60982	0.543335	2.0052
A16L2_MOUSE|Q6KAU8_S240	KO_Late-KO_Uninfected	0.51924	0.127664	8.44283	0.00321273	0.0149068	2.49313	0.51924	1.82662
A16L2_MOUSE|Q6KAU8_S240	WT_Early-Wt_Uninfected	0.687768	0.156356	8.44283	0.00201104	0.00818979	2.69658	0.687768	2.08673
A16L2_MOUSE|Q6KAU8_S240	WT_Late-Wt_Uninfected	0.484014	0.156356	8.44283	0.0138293	0.0415836	1.8592	0.484014	1.38108
A16L2_MOUSE|Q6KAU8_S240	Infected-Uninfected	0.558589	0.0902721	8.44283	0.000210513	0.000861147	3.67672	0.558589	3.06492
A16L2_MOUSE|Q6KAU8_S240	KO-WT	-0.0963294	0.0796125	8.44283	0.259073	0.383087	0.586577	0.0963294	0.416703
A16L2_MOUSE|Q6KAU8_S240	Early-Uninfected	0.615552	0.100927	8.44283	0.000233093	0.000968546	3.63247	0.615552	3.01388
A16L2_MOUSE|Q6KAU8_S240	Late-Uninfected	0.501627	0.100927	8.44283	0.000931293	0.00367316	3.03091	0.501627	2.43496
A16L2_MOUSE|Q6KAU8_S282	KO_Early-WT_Early	-0.423569	0.104173	19.4428	0.000633015	0.0109396	3.19859	0.423569	1.961
A16L2_MOUSE|Q6KAU8_S282	KO_Late-WT_Late	-0.321668	0.104173	19.4428	0.00594076	0.0413373	2.22616	0.321668	1.38366
A16L2_MOUSE|Q6KAU8_S282	KO_Uninfected-WT_Uninfected	-0.119839	0.120289	19.4428	0.33136	0.592307	0.479699	0.119839	0.227453
A16L2_MOUSE|Q6KAU8_S282	KO_Early-KO_Uninfected	-0.226196	0.11252	19.4428	0.0584806	0.123332	1.23299	0.226196	0.908923
A16L2_MOUSE|Q6KAU8_S282	KO_Late-KO_Uninfected	-0.278876	0.11252	19.4428	0.0225128	0.0659322	1.64757	0.278876	1.1809
A16L2_MOUSE|Q6KAU8_S282	WT_Early-Wt_Uninfected	0.0775337	0.11252	19.4428	0.498923	0.61099	0.301967	0.0775337	0.213966
A16L2_MOUSE|Q6KAU8_S282	WT_Late-Wt_Uninfected	-0.0770473	0.11252	19.4428	0.501587	0.621438	0.299654	0.0770473	0.206603
A16L2_MOUSE|Q6KAU8_S282	Infected-Uninfected	-0.126146	0.0705255	19.4428	0.0892626	0.140747	1.04933	0.126146	0.851562
A16L2_MOUSE|Q6KAU8_S282	KO-WT	-0.288359	0.0633977	19.4428	0.000208406	0.00197688	3.68109	0.288359	2.70402
A16L2_MOUSE|Q6KAU8_S282	Early-Uninfected	-0.0743314	0.0795635	19.4428	0.361639	0.453641	0.441725	0.0743314	0.343288
A16L2_MOUSE|Q6KAU8_S282	Late-Uninfected	-0.177962	0.0795635	19.4428	0.037201	0.0743283	1.42945	0.177962	1.12885
A16L2_MOUSE|Q6KAU8_S308	KO_Early-WT_Early	-0.633468	0.133927	8.44283	0.00127971	0.0168568	2.89289	0.633468	1.77322
A16L2_MOUSE|Q6KAU8_S308	KO_Late-WT_Late	-0.601877	0.133927	8.44283	0.0017628	0.0190011	2.7538	0.601877	1.72122
A16L2_MOUSE|Q6KAU8_S308	KO_Uninfected-WT_Uninfected	-0.434537	0.164026	8.44283	0.0279697	0.153711	1.55331	0.434537	0.813294
A16L2_MOUSE|Q6KAU8_S308	KO_Early-KO_Uninfected	-0.26867	0.133927	8.44283	0.0778915	0.154508	1.10851	0.26867	0.81105
A16L2_MOUSE|Q6KAU8_S308	KO_Late-KO_Uninfected	-0.170504	0.133927	8.44283	0.236912	0.379988	0.625412	0.170504	0.42023
A16L2_MOUSE|Q6KAU8_S308	WT_Early-Wt_Uninfected	-0.0697388	0.164026	8.44283	0.681344	0.76733	0.166634	0.0697388	0.115018
A16L2_MOUSE|Q6KAU8_S308	WT_Late-Wt_Uninfected	-0.0031647	0.164026	8.44283	0.985055	0.990042	0.00653956	0.0031647	0.00434619
A16L2_MOUSE|Q6KAU8_S308	Infected-Uninfected	-0.12802	0.0947007	8.44283	0.211528	0.288105	0.674632	0.12802	0.540448
A16L2_MOUSE|Q6KAU8_S308	KO-WT	-0.556627	0.0835181	8.44283	0.000123885	0.00136517	3.90698	0.556627	2.86481
A16L2_MOUSE|Q6KAU8_S308	Early-Uninfected	-0.169205	0.105879	8.44283	0.146707	0.217452	0.833548	0.169205	0.662637
A16L2_MOUSE|Q6KAU8_S308	Late-Uninfected	-0.0868345	0.105879	8.44283	0.434682	0.534939	0.361828	0.0868345	0.271695
A16L2_MOUSE|Q6KAU8_T284	KO_Early-WT_Early	-0.61547	0.126569	8.44283	0.00107247	0.0150051	2.96962	0.61547	1.82376
A16L2_MOUSE|Q6KAU8_T284	KO_Late-WT_Late	-0.553983	0.126569	8.44283	0.00207298	0.0210827	2.6834	0.553983	1.67607
A16L2_MOUSE|Q6KAU8_T284	KO_Uninfected-WT_Uninfected	-0.319285	0.155015	8.44283	0.0715605	0.259652	1.14533	0.319285	0.585609
A16L2_MOUSE|Q6KAU8_T284	KO_Early-KO_Uninfected	-0.08112	0.126569	8.44283	0.538583	0.661201	0.268747	0.08112	0.179667
A16L2_MOUSE|Q6KAU8_T284	KO_Late-KO_Uninfected	-0.165036	0.126569	8.44283	0.226688	0.368039	0.644572	0.165036	0.434106
A16L2_MOUSE|Q6KAU8_T284	WT_Early-Wt_Uninfected	0.215065	0.155015	8.44283	0.200849	0.308351	0.697129	0.215065	0.510954
A16L2_MOUSE|Q6KAU8_T284	WT_Late-Wt_Uninfected	0.0696622	0.155015	8.44283	0.664464	0.75797	0.177529	0.0696622	0.120348
A16L2_MOUSE|Q6KAU8_T284	Infected-Uninfected	0.00964264	0.089498	8.44283	0.916718	0.938075	0.0377645	0.00964264	0.0277622
A16L2_MOUSE|Q6KAU8_T284	KO-WT	-0.496246	0.0789298	8.44283	0.000188073	0.00183652	3.72567	0.496246	2.73601
A16L2_MOUSE|Q6KAU8_T284	Early-Uninfected	0.0669723	0.100062	8.44283	0.521178	0.606006	0.283014	0.0669723	0.217523
A16L2_MOUSE|Q6KAU8_T284	Late-Uninfected	-0.047687	0.100062	8.44283	0.645756	0.726707	0.189932	0.047687	0.138641
A1L3P4_MOUSE|A1L3P4_S658	KO_Early-WT_Early	0.533529	0.237514	8.44283	0.053193	0.171577	1.27415	0.533529	0.765541
A1L3P4_MOUSE|A1L3P4_S658	KO_Late-WT_Late	0.921745	0.237514	8.44283	0.00421039	0.0331101	2.37568	0.921745	1.48004
A1L3P4_MOUSE|A1L3P4_S658	KO_Uninfected-WT_Uninfected	-0.163445	0.290895	8.44283	0.588807	0.787545	0.230027	0.163445	0.103725
A1L3P4_MOUSE|A1L3P4_S658	KO_Early-KO_Uninfected	-0.72336	0.237514	8.44283	0.0149539	0.0419569	1.82525	0.72336	1.3772
A1L3P4_MOUSE|A1L3P4_S658	KO_Late-KO_Uninfected	-0.696331	0.237514	8.44283	0.0178782	0.0551872	1.74768	0.696331	1.25816
A1L3P4_MOUSE|A1L3P4_S658	WT_Early-Wt_Uninfected	-1.42033	0.290895	8.44283	0.00104462	0.00483832	2.98104	1.42033	2.31531
A1L3P4_MOUSE|A1L3P4_S658	WT_Late-Wt_Uninfected	-1.78152	0.290895	8.44283	0.0002264	0.00190833	3.64512	1.78152	2.71935
A1L3P4_MOUSE|A1L3P4_S658	Infected-Uninfected	-1.15539	0.167948	8.44283	9.84383e-05	0.000457671	4.00684	1.15539	3.33945
A1L3P4_MOUSE|A1L3P4_S658	KO-WT	0.43061	0.148116	8.44283	0.0185818	0.05298	1.73091	0.43061	1.27589
A1L3P4_MOUSE|A1L3P4_S658	Early-Uninfected	-1.07185	0.187772	8.44283	0.000369213	0.00142415	3.43272	1.07185	2.84645
A1L3P4_MOUSE|A1L3P4_S658	Late-Uninfected	-1.23893	0.187772	8.44283	0.000133203	0.000764263	3.87549	1.23893	3.11676
A1L3P4_MOUSE|A1L3P4_S693	KO_Early-WT_Early	-0.0223198	0.129568	8.44283	0.867289	0.928772	0.0618362	0.0223198	0.0320907
A1L3P4_MOUSE|A1L3P4_S693	KO_Late-WT_Late	0.610241	0.129568	8.44283	0.00131478	0.0156285	2.88115	0.610241	1.80608
A1L3P4_MOUSE|A1L3P4_S693	KO_Uninfected-WT_Uninfected	0.344942	0.158688	8.44283	0.0597121	0.234035	1.22394	0.344942	0.63072
A1L3P4_MOUSE|A1L3P4_S693	KO_Early-KO_Uninfected	-0.629078	0.129568	8.44283	0.00108318	0.00509241	2.9653	0.629078	2.29308
A1L3P4_MOUSE|A1L3P4_S693	KO_Late-KO_Uninfected	0.0803972	0.129568	8.44283	0.551306	0.686606	0.258607	0.0803972	0.163293
A1L3P4_MOUSE|A1L3P4_S693	WT_Early-Wt_Uninfected	-0.261815	0.158688	8.44283	0.135592	0.227597	0.867766	0.261815	0.642834
A1L3P4_MOUSE|A1L3P4_S693	WT_Late-Wt_Uninfected	-0.184901	0.158688	8.44283	0.275807	0.400062	0.559395	0.184901	0.397872
A1L3P4_MOUSE|A1L3P4_S693	Infected-Uninfected	-0.248849	0.0916185	8.44283	0.0251447	0.0484169	1.59955	0.248849	1.315
A1L3P4_MOUSE|A1L3P4_S693	KO-WT	0.310954	0.0807999	8.44283	0.00441484	0.0183561	2.35509	0.310954	1.73622
A1L3P4_MOUSE|A1L3P4_S693	Early-Uninfected	-0.445447	0.102433	8.44283	0.00215622	0.00633497	2.66631	0.445447	2.19826
A1L3P4_MOUSE|A1L3P4_S693	Late-Uninfected	-0.0522518	0.102433	8.44283	0.623041	0.706844	0.205483	0.0522518	0.150676
A1L3P4_MOUSE|A1L3P4_S700	KO_Early-WT_Early	0.182044	0.12648	19.4428	0.16597	0.347457	0.779972	0.182044	0.459099
A1L3P4_MOUSE|A1L3P4_S700	KO_Late-WT_Late	0.238741	0.12648	19.4428	0.074102	0.204248	1.13017	0.238741	0.689841
A1L3P4_MOUSE|A1L3P4_S700	KO_Uninfected-WT_Uninfected	-0.241685	0.146047	19.4428	0.114008	0.334563	0.943064	0.241685	0.475522
A1L3P4_MOUSE|A1L3P4_S700	KO_Early-KO_Uninfected	-0.265399	0.136614	19.4428	0.0666785	0.137021	1.17601	0.265399	0.863212
A1L3P4_MOUSE|A1L3P4_S700	KO_Late-KO_Uninfected	0.237104	0.136614	19.4428	0.0984623	0.199345	1.00673	0.237104	0.700395
A1L3P4_MOUSE|A1L3P4_S700	WT_Early-Wt_Uninfected	-0.689128	0.136614	19.4428	6.73526e-05	0.000549501	4.17165	0.689128	3.26003
A1L3P4_MOUSE|A1L3P4_S700	WT_Late-Wt_Uninfected	-0.243322	0.136614	19.4428	0.0905271	0.173696	1.04322	0.243322	0.760211
A1L3P4_MOUSE|A1L3P4_S700	Infected-Uninfected	-0.240186	0.0856274	19.4428	0.0111329	0.024311	1.95339	0.240186	1.6142
A1L3P4_MOUSE|A1L3P4_S700	KO-WT	0.0596997	0.0769733	19.4428	0.447323	0.573197	0.349379	0.0596997	0.241696
A1L3P4_MOUSE|A1L3P4_S700	Early-Uninfected	-0.477263	0.0966007	19.4428	8.5179e-05	0.000414165	4.06967	0.477263	3.38283
A1L3P4_MOUSE|A1L3P4_S700	Late-Uninfected	-0.00310947	0.0966007	19.4428	0.97465	0.982797	0.0111515	0.00310947	0.00753617
A1L3S5_MOUSE|A1L3S5_S513	KO_Early-WT_Early	0.617146	0.175695	19.4428	0.00226456	0.0242747	2.64502	0.617146	1.61485
A1L3S5_MOUSE|A1L3S5_S513	KO_Late-WT_Late	0.703893	0.175695	19.4428	0.000726513	0.0108064	3.13876	0.703893	1.96632
A1L3S5_MOUSE|A1L3S5_S513	KO_Uninfected-WT_Uninfected	0.564787	0.202875	19.4428	0.0116598	0.0952745	1.93331	0.564787	1.02102
A1L3S5_MOUSE|A1L3S5_S513	KO_Early-KO_Uninfected	0.341891	0.189772	19.4428	0.0871395	0.168389	1.05978	0.341891	0.773686
A1L3S5_MOUSE|A1L3S5_S513	KO_Late-KO_Uninfected	0.395583	0.189772	19.4428	0.0505269	0.121065	1.29648	0.395583	0.916982
A1L3S5_MOUSE|A1L3S5_S513	WT_Early-Wt_Uninfected	0.289533	0.189772	19.4428	0.143191	0.23774	0.844084	0.289533	0.623898
A1L3S5_MOUSE|A1L3S5_S513	WT_Late-Wt_Uninfected	0.256478	0.189772	19.4428	0.19205	0.30608	0.716586	0.256478	0.514165
A1L3S5_MOUSE|A1L3S5_S513	Infected-Uninfected	0.320871	0.118946	19.4428	0.0140738	0.0296494	1.85159	0.320871	1.52798
A1L3S5_MOUSE|A1L3S5_S513	KO-WT	0.628608	0.106924	19.4428	1.05907e-05	0.000219052	4.97507	0.628608	3.65945
A1L3S5_MOUSE|A1L3S5_S513	Early-Uninfected	0.315712	0.134189	19.4428	0.0292997	0.0566984	1.53314	0.315712	1.24643
A1L3S5_MOUSE|A1L3S5_S513	Late-Uninfected	0.326031	0.134189	19.4428	0.0249523	0.0537944	1.60289	0.326031	1.26926
A2A472_MOUSE|A2A472_S232	KO_Early-WT_Early	-1.32302	0.172511	8.44283	4.41122e-05	0.00184744	4.35544	1.32302	2.73343
A2A472_MOUSE|A2A472_S232	KO_Late-WT_Late	-1.88558	0.172511	8.44283	2.84923e-06	0.000291084	5.54527	1.88558	3.53598
A2A472_MOUSE|A2A472_S232	KO_Uninfected-WT_Uninfected	-1.23247	0.211282	8.44283	0.000317983	0.0128541	3.4976	1.23247	1.89096
A2A472_MOUSE|A2A472_S232	KO_Early-KO_Uninfected	-1.10135	0.172511	8.44283	0.000168662	0.00113977	3.77298	1.10135	2.94318
A2A472_MOUSE|A2A472_S232	KO_Late-KO_Uninfected	-1.02449	0.172511	8.44283	0.000280815	0.00229794	3.55158	1.02449	2.63866
A2A472_MOUSE|A2A472_S232	WT_Early-Wt_Uninfected	-1.01079	0.211282	8.44283	0.00119036	0.00536643	2.92432	1.01079	2.27031
A2A472_MOUSE|A2A472_S232	WT_Late-Wt_Uninfected	-0.371377	0.211282	8.44283	0.114876	0.208241	0.939772	0.371377	0.681433
A2A472_MOUSE|A2A472_S232	Infected-Uninfected	-0.877002	0.121984	8.44283	7.1266e-05	0.000347858	4.14712	0.877002	3.4586
A2A472_MOUSE|A2A472_S232	KO-WT	-1.48036	0.107579	8.44283	4.48015e-07	1.92105e-05	6.34871	1.48036	4.71646
A2A472_MOUSE|A2A472_S232	Early-Uninfected	-1.05607	0.136382	8.44283	4.10401e-05	0.000224268	4.38679	1.05607	3.64923
A2A472_MOUSE|A2A472_S232	Late-Uninfected	-0.697934	0.136382	8.44283	0.000769543	0.00314899	3.11377	0.697934	2.50183
A2A472_MOUSE|A2A472_S248	KO_Early-WT_Early	-1.83847	0.212007	8.44283	1.73834e-05	0.000982667	4.75987	1.83847	3.00759
A2A472_MOUSE|A2A472_S248	KO_Late-WT_Late	-2.02045	0.212007	8.44283	8.37794e-06	0.000605228	5.07686	2.02045	3.21808
A2A472_MOUSE|A2A472_S248	KO_Uninfected-WT_Uninfected	-1.40462	0.259654	8.44283	0.000532014	0.0173803	3.27408	1.40462	1.75994
A2A472_MOUSE|A2A472_S248	KO_Early-KO_Uninfected	-0.296933	0.212007	8.44283	0.197003	0.315876	0.705527	0.296933	0.500483
A2A472_MOUSE|A2A472_S248	KO_Late-KO_Uninfected	-0.593259	0.212007	8.44283	0.0220723	0.0649289	1.65615	0.593259	1.18756
A2A472_MOUSE|A2A472_S248	WT_Early-Wt_Uninfected	0.136924	0.259654	8.44283	0.611537	0.709179	0.213577	0.136924	0.149244
A2A472_MOUSE|A2A472_S248	WT_Late-Wt_Uninfected	0.0225751	0.259654	8.44283	0.932744	0.955834	0.0302377	0.0225751	0.0196176
A2A472_MOUSE|A2A472_S248	Infected-Uninfected	-0.182673	0.149911	8.44283	0.255971	0.336986	0.591809	0.182673	0.472388
A2A472_MOUSE|A2A472_S248	KO-WT	-1.75451	0.132209	8.44283	6.01034e-07	2.41304e-05	6.2211	1.75451	4.61744
A2A472_MOUSE|A2A472_S248	Early-Uninfected	-0.0800046	0.167606	8.44283	0.645235	0.716725	0.190282	0.0800046	0.144647
A2A472_MOUSE|A2A472_S248	Late-Uninfected	-0.285342	0.167606	8.44283	0.125097	0.199219	0.902752	0.285342	0.70067
A2A472_MOUSE|A2A472_S363	KO_Early-WT_Early	-1.54993	0.259688	19.4428	8.72706e-06	0.000619793	5.05913	1.54993	3.20775
A2A472_MOUSE|A2A472_S363	KO_Late-WT_Late	-1.64552	0.259688	19.4428	3.9759e-06	0.000360577	5.40056	1.64552	3.443
A2A472_MOUSE|A2A472_S363	KO_Uninfected-WT_Uninfected	-1.43194	0.299862	19.4428	0.000124021	0.00744215	3.9065	1.43194	2.1283
A2A472_MOUSE|A2A472_S363	KO_Early-KO_Uninfected	-0.518889	0.280495	19.4428	0.0795869	0.157067	1.09916	0.518889	0.803914
A2A472_MOUSE|A2A472_S363	KO_Late-KO_Uninfected	-0.308424	0.280495	19.4428	0.284948	0.433502	0.545234	0.308424	0.363009
A2A472_MOUSE|A2A472_S363	WT_Early-Wt_Uninfected	-0.400901	0.280495	19.4428	0.1688	0.269696	0.772628	0.400901	0.569126
A2A472_MOUSE|A2A472_S363	WT_Late-Wt_Uninfected	-0.0948468	0.280495	19.4428	0.738881	0.816302	0.131425	0.0948468	0.0881492
A2A472_MOUSE|A2A472_S363	Infected-Uninfected	-0.330765	0.17581	19.4428	0.0749801	0.121439	1.12505	0.330765	0.915641
A2A472_MOUSE|A2A472_S363	KO-WT	-1.54246	0.158041	19.4428	6.23763e-09	6.72091e-07	8.20498	1.54246	6.17257
A2A472_MOUSE|A2A472_S363	Early-Uninfected	-0.459895	0.19834	19.4428	0.0314387	0.0601002	1.50253	0.459895	1.22112
A2A472_MOUSE|A2A472_S363	Late-Uninfected	-0.201636	0.19834	19.4428	0.321821	0.422332	0.492386	0.201636	0.374346
A2A4N8_MOUSE|A2A4N8_T582	KO_Early-WT_Early	2.58212	0.161516	8.44283	1.318e-07	2.81606e-05	6.88008	2.58212	4.55036
A2A4N8_MOUSE|A2A4N8_T582	KO_Late-WT_Late	2.04005	0.161516	8.44283	8.95944e-07	0.000125616	6.04772	2.04005	3.90096
A2A4N8_MOUSE|A2A4N8_T582	KO_Uninfected-WT_Uninfected	2.03132	0.197816	8.44283	4.66793e-06	0.000858729	5.33088	2.03132	3.06614
A2A4N8_MOUSE|A2A4N8_T582	KO_Early-KO_Uninfected	-0.137586	0.161516	8.44283	0.417807	0.553011	0.379024	0.137586	0.257267
A2A4N8_MOUSE|A2A4N8_T582	KO_Late-KO_Uninfected	-0.532679	0.161516	8.44283	0.0101063	0.0358963	1.99541	0.532679	1.44495
A2A4N8_MOUSE|A2A4N8_T582	WT_Early-Wt_Uninfected	-0.688386	0.197816	8.44283	0.00765358	0.0238294	2.11614	0.688386	1.62289
A2A4N8_MOUSE|A2A4N8_T582	WT_Late-Wt_Uninfected	-0.541412	0.197816	8.44283	0.0243277	0.0638256	1.6139	0.541412	1.19501
A2A4N8_MOUSE|A2A4N8_T582	Infected-Uninfected	-0.475016	0.114209	8.44283	0.00281676	0.0076342	2.55025	0.475016	2.11724
A2A4N8_MOUSE|A2A4N8_T582	KO-WT	2.21783	0.100723	8.44283	9.36054e-09	9.0772e-07	8.0287	2.21783	6.04205
A2A4N8_MOUSE|A2A4N8_T582	Early-Uninfected	-0.412986	0.12769	8.44283	0.0111495	0.0253462	1.95275	0.412986	1.59609
A2A4N8_MOUSE|A2A4N8_T582	Late-Uninfected	-0.537045	0.12769	8.44283	0.002636	0.00854556	2.57905	0.537045	2.06826
A2A6P4_MOUSE|A2A6P4_S62	KO_Early-WT_Early	0.331445	0.150358	19.4428	0.0397304	0.143309	1.40088	0.331445	0.843728
A2A6P4_MOUSE|A2A6P4_S62	KO_Late-WT_Late	0.182041	0.150358	19.4428	0.240518	0.431658	0.618853	0.182041	0.36486
A2A6P4_MOUSE|A2A6P4_S62	KO_Uninfected-WT_Uninfected	0.0738194	0.173619	19.4428	0.675373	0.84015	0.170456	0.0738194	0.0756434
A2A6P4_MOUSE|A2A6P4_S62	KO_Early-KO_Uninfected	0.384072	0.162405	19.4428	0.0285684	0.0703691	1.54411	0.384072	1.15262
A2A6P4_MOUSE|A2A6P4_S62	KO_Late-KO_Uninfected	0.317443	0.162405	19.4428	0.0651592	0.146357	1.18602	0.317443	0.834587
A2A6P4_MOUSE|A2A6P4_S62	WT_Early-Wt_Uninfected	0.126447	0.162405	19.4428	0.445595	0.562855	0.351059	0.126447	0.249603
A2A6P4_MOUSE|A2A6P4_S62	WT_Late-Wt_Uninfected	0.209222	0.162405	19.4428	0.212773	0.33054	0.672084	0.209222	0.480776
A2A6P4_MOUSE|A2A6P4_S62	Infected-Uninfected	0.259296	0.101793	19.4428	0.019451	0.0389932	1.71106	0.259296	1.40901
A2A6P4_MOUSE|A2A6P4_S62	KO-WT	0.195768	0.0915051	19.4428	0.0452875	0.102666	1.34402	0.195768	0.988575
A2A6P4_MOUSE|A2A6P4_S62	Early-Uninfected	0.25526	0.114838	19.4428	0.0382723	0.0709368	1.41712	0.25526	1.14913
A2A6P4_MOUSE|A2A6P4_S62	Late-Uninfected	0.263333	0.114838	19.4428	0.0331454	0.0677226	1.47958	0.263333	1.16927
A2A6P4_MOUSE|A2A6P4_S62_S64	KO_Early-WT_Early	0.564809	0.0986465	19.4428	1.47947e-05	0.000891096	4.82989	0.564809	3.05008
A2A6P4_MOUSE|A2A6P4_S62_S64	KO_Late-WT_Late	0.394851	0.0986465	19.4428	0.000732674	0.0108564	3.13509	0.394851	1.96432
A2A6P4_MOUSE|A2A6P4_S62_S64	KO_Uninfected-WT_Uninfected	0.0440946	0.113907	19.4428	0.702879	0.856765	0.153119	0.0440946	0.0671382
A2A6P4_MOUSE|A2A6P4_S62_S64	KO_Early-KO_Uninfected	0.0183877	0.10655	19.4428	0.864771	0.91287	0.0630989	0.0183877	0.039591
A2A6P4_MOUSE|A2A6P4_S62_S64	KO_Late-KO_Uninfected	-0.109584	0.10655	19.4428	0.316355	0.467841	0.499825	0.109584	0.329902
A2A6P4_MOUSE|A2A6P4_S62_S64	WT_Early-Wt_Uninfected	-0.502326	0.10655	19.4428	0.000142509	0.000994372	3.84616	0.502326	3.00245
A2A6P4_MOUSE|A2A6P4_S62_S64	WT_Late-Wt_Uninfected	-0.46034	0.10655	19.4428	0.000352036	0.00265714	3.45341	0.46034	2.57559
A2A6P4_MOUSE|A2A6P4_S62_S64	Infected-Uninfected	-0.263466	0.066784	19.4428	0.000836949	0.00273923	3.0773	0.263466	2.56237
A2A6P4_MOUSE|A2A6P4_S62_S64	KO-WT	0.334585	0.0600344	19.4428	2.06758e-05	0.000363782	4.68454	0.334585	3.43916
A2A6P4_MOUSE|A2A6P4_S62_S64	Early-Uninfected	-0.241969	0.0753425	19.4428	0.00449493	0.0117493	2.34728	0.241969	1.92999
A2A6P4_MOUSE|A2A6P4_S62_S64	Late-Uninfected	-0.284962	0.0753425	19.4428	0.00121847	0.00456379	2.91418	0.284962	2.34067
A2A6P4_MOUSE|A2A6P4_S64	KO_Early-WT_Early	0.486221	0.172743	19.4428	0.0108986	0.0647597	1.96263	0.486221	1.1887
A2A6P4_MOUSE|A2A6P4_S64	KO_Late-WT_Late	0.284953	0.172743	19.4428	0.115093	0.270003	0.938951	0.284953	0.568631
A2A6P4_MOUSE|A2A6P4_S64	KO_Uninfected-WT_Uninfected	-0.0229423	0.199467	19.4428	0.90961	0.96097	0.0411447	0.0229423	0.0172901
A2A6P4_MOUSE|A2A6P4_S64	KO_Early-KO_Uninfected	0.839229	0.186584	19.4428	0.000234045	0.00148774	3.6307	0.839229	2.82747
A2A6P4_MOUSE|A2A6P4_S64	KO_Late-KO_Uninfected	0.802353	0.186584	19.4428	0.000368786	0.00283987	3.43323	0.802353	2.5467
A2A6P4_MOUSE|A2A6P4_S64	WT_Early-Wt_Uninfected	0.330065	0.186584	19.4428	0.0925813	0.169313	1.03348	0.330065	0.771311
A2A6P4_MOUSE|A2A6P4_S64	WT_Late-Wt_Uninfected	0.494457	0.186584	19.4428	0.0156007	0.0454781	1.80686	0.494457	1.3422
A2A6P4_MOUSE|A2A6P4_S64	Infected-Uninfected	0.616526	0.116948	19.4428	4.039e-05	0.000216977	4.39373	0.616526	3.66359
A2A6P4_MOUSE|A2A6P4_S64	KO-WT	0.249411	0.105128	19.4428	0.0281231	0.0720312	1.55094	0.249411	1.14248
A2A6P4_MOUSE|A2A6P4_S64	Early-Uninfected	0.584647	0.131935	19.4428	0.000272707	0.00110623	3.5643	0.584647	2.95616
A2A6P4_MOUSE|A2A6P4_S64	Late-Uninfected	0.648405	0.131935	19.4428	9.03522e-05	0.000556528	4.04406	0.648405	3.25451
A2A6P4_MOUSE|A2A6P4_T47	KO_Early-WT_Early	-0.348828	0.14605	8.44283	0.0424	0.149342	1.37263	0.348828	0.825819
A2A6P4_MOUSE|A2A6P4_T47	KO_Late-WT_Late	-0.331332	0.14605	8.44283	0.051334	0.162878	1.2896	0.331332	0.788136
A2A6P4_MOUSE|A2A6P4_T47	KO_Uninfected-WT_Uninfected	0.0573159	0.178874	8.44283	0.756433	0.884905	0.121229	0.0573159	0.0531035
A2A6P4_MOUSE|A2A6P4_T47	KO_Early-KO_Uninfected	0.356231	0.14605	8.44283	0.0391029	0.0900455	1.40779	0.356231	1.04554
A2A6P4_MOUSE|A2A6P4_T47	KO_Late-KO_Uninfected	0.363561	0.14605	8.44283	0.0360919	0.0941873	1.44259	0.363561	1.02601
A2A6P4_MOUSE|A2A6P4_T47	WT_Early-Wt_Uninfected	0.762375	0.178874	8.44283	0.00243475	0.00951187	2.61355	0.762375	2.02173
A2A6P4_MOUSE|A2A6P4_T47	WT_Late-Wt_Uninfected	0.752208	0.178874	8.44283	0.00263837	0.01192	2.57866	0.752208	1.92373
A2A6P4_MOUSE|A2A6P4_T47	Infected-Uninfected	0.558594	0.103273	8.44283	0.000532454	0.0018787	3.27372	0.558594	2.72614
A2A6P4_MOUSE|A2A6P4_T47	KO-WT	-0.207614	0.0910783	8.44283	0.0504491	0.111498	1.29715	0.207614	0.952731
A2A6P4_MOUSE|A2A6P4_T47	Early-Uninfected	0.559303	0.115463	8.44283	0.00109932	0.00357983	2.95887	0.559303	2.44614
A2A6P4_MOUSE|A2A6P4_T47	Late-Uninfected	0.557885	0.115463	8.44283	0.00111736	0.0042482	2.95181	0.557885	2.3718
A2A716_MOUSE|A2A716_S393	KO_Early-WT_Early	-0.1421	0.103702	19.4428	0.186215	0.371987	0.729985	0.1421	0.429472
A2A716_MOUSE|A2A716_S393	KO_Late-WT_Late	-0.119714	0.103702	19.4428	0.262324	0.453772	0.581162	0.119714	0.343163
A2A716_MOUSE|A2A716_S393	KO_Uninfected-WT_Uninfected	0.267903	0.119744	19.4428	0.0371576	0.178887	1.42995	0.267903	0.747421
A2A716_MOUSE|A2A716_S393	KO_Early-KO_Uninfected	-0.526484	0.112011	19.4428	0.000147187	0.00102421	3.83213	0.526484	2.98961
A2A716_MOUSE|A2A716_S393	KO_Late-KO_Uninfected	-0.463926	0.112011	19.4428	0.000531424	0.00376342	3.27456	0.463926	2.42442
A2A716_MOUSE|A2A716_S393	WT_Early-Wt_Uninfected	-0.11648	0.112011	19.4428	0.311143	0.43011	0.50704	0.11648	0.36642
A2A716_MOUSE|A2A716_S393	WT_Late-Wt_Uninfected	-0.0763082	0.112011	19.4428	0.503742	0.623035	0.297792	0.0763082	0.205487
A2A716_MOUSE|A2A716_S393	Infected-Uninfected	-0.2958	0.0702063	19.4428	0.000450622	0.00163258	3.34619	0.2958	2.78713
A2A716_MOUSE|A2A716_S393	KO-WT	0.00202961	0.0631108	19.4428	0.974673	0.984605	0.0111412	0.00202961	0.00673802
A2A716_MOUSE|A2A716_S393	Early-Uninfected	-0.321482	0.0792034	19.4428	0.000643432	0.00227065	3.1915	0.321482	2.64385
A2A716_MOUSE|A2A716_S393	Late-Uninfected	-0.270117	0.0792034	19.4428	0.0028607	0.00913502	2.54353	0.270117	2.03929
A2A7F4_MOUSE|A2A7F4_S1037	KO_Early-WT_Early	-0.281252	0.136602	19.4428	0.0531522	0.171545	1.27448	0.281252	0.765621
A2A7F4_MOUSE|A2A7F4_S1037	KO_Late-WT_Late	-0.152739	0.136602	19.4428	0.277134	0.469784	0.55731	0.152739	0.328102
A2A7F4_MOUSE|A2A7F4_S1037	KO_Uninfected-WT_Uninfected	-0.593429	0.157734	19.4428	0.00127595	0.0285593	2.89417	0.593429	1.54425
A2A7F4_MOUSE|A2A7F4_S1037	KO_Early-KO_Uninfected	0.11396	0.147546	19.4428	0.449186	0.581533	0.347573	0.11396	0.235425
A2A7F4_MOUSE|A2A7F4_S1037	KO_Late-KO_Uninfected	0.230219	0.147546	19.4428	0.134815	0.251974	0.870263	0.230219	0.598644
A2A7F4_MOUSE|A2A7F4_S1037	WT_Early-Wt_Uninfected	-0.198218	0.147546	19.4428	0.194606	0.301	0.710845	0.198218	0.521433
A2A7F4_MOUSE|A2A7F4_S1037	WT_Late-Wt_Uninfected	-0.21047	0.147546	19.4428	0.169595	0.278915	0.770587	0.21047	0.554528
A2A7F4_MOUSE|A2A7F4_S1037	Infected-Uninfected	-0.0161272	0.0924797	19.4428	0.863365	0.896322	0.0638057	0.0161272	0.0475358
A2A7F4_MOUSE|A2A7F4_S1037	KO-WT	-0.342473	0.083133	19.4428	0.000559394	0.00400796	3.25228	0.342473	2.39708
A2A7F4_MOUSE|A2A7F4_S1037	Early-Uninfected	-0.042129	0.104331	19.4428	0.690766	0.755724	0.160669	0.042129	0.121637
A2A7F4_MOUSE|A2A7F4_S1037	Late-Uninfected	0.00987461	0.104331	19.4428	0.925564	0.94709	0.0335936	0.00987461	0.0236089
A2A7F4_MOUSE|A2A7F4_S1265	KO_Early-WT_Early	0.130856	0.16252	8.44283	0.442804	0.634641	0.353789	0.130856	0.197472
A2A7F4_MOUSE|A2A7F4_S1265	KO_Late-WT_Late	0.0193428	0.16252	8.44283	0.908044	0.949549	0.0418929	0.0193428	0.0224828
A2A7F4_MOUSE|A2A7F4_S1265	KO_Uninfected-WT_Uninfected	-0.125152	0.199045	8.44283	0.546137	0.760787	0.262698	0.125152	0.118737
A2A7F4_MOUSE|A2A7F4_S1265	KO_Early-KO_Uninfected	-0.41367	0.16252	8.44283	0.0330028	0.0789561	1.48145	0.41367	1.10261
A2A7F4_MOUSE|A2A7F4_S1265	KO_Late-KO_Uninfected	-0.295631	0.16252	8.44283	0.104449	0.208485	0.981095	0.295631	0.680925
A2A7F4_MOUSE|A2A7F4_S1265	WT_Early-Wt_Uninfected	-0.669678	0.199045	8.44283	0.00912632	0.0273996	2.0397	0.669678	1.56226
A2A7F4_MOUSE|A2A7F4_S1265	WT_Late-Wt_Uninfected	-0.440126	0.199045	8.44283	0.0562543	0.121191	1.24984	0.440126	0.916531
A2A7F4_MOUSE|A2A7F4_S1265	Infected-Uninfected	-0.454776	0.114919	8.44283	0.0037655	0.0097727	2.42418	0.454776	2.00999
A2A7F4_MOUSE|A2A7F4_S1265	KO-WT	0.00834908	0.101349	8.44283	0.936265	0.959127	0.0286014	0.00834908	0.0181238
A2A7F4_MOUSE|A2A7F4_S1265	Early-Uninfected	-0.541674	0.128483	8.44283	0.00259873	0.00739883	2.58524	0.541674	2.13084
A2A7F4_MOUSE|A2A7F4_S1265	Late-Uninfected	-0.367879	0.128483	8.44283	0.0199175	0.0446704	1.70077	0.367879	1.34998
A2A7F4_MOUSE|A2A7F4_S631	KO_Early-WT_Early	-0.0281743	0.101071	19.4428	0.783373	0.88026	0.106031	0.0281743	0.0553888
A2A7F4_MOUSE|A2A7F4_S631	KO_Late-WT_Late	0.0416158	0.101071	19.4428	0.685026	0.812207	0.164293	0.0416158	0.090333
A2A7F4_MOUSE|A2A7F4_S631	KO_Uninfected-WT_Uninfected	-0.384358	0.116706	19.4428	0.00373437	0.0507644	2.42778	0.384358	1.29444
A2A7F4_MOUSE|A2A7F4_S631	KO_Early-KO_Uninfected	0.217702	0.109169	19.4428	0.0603472	0.126429	1.21934	0.217702	0.898155
A2A7F4_MOUSE|A2A7F4_S631	KO_Late-KO_Uninfected	0.292302	0.109169	19.4428	0.0147006	0.0476392	1.83266	0.292302	1.32204
A2A7F4_MOUSE|A2A7F4_S631	WT_Early-Wt_Uninfected	-0.138482	0.109169	19.4428	0.219594	0.33019	0.65838	0.138482	0.481236
A2A7F4_MOUSE|A2A7F4_S631	WT_Late-Wt_Uninfected	-0.133672	0.109169	19.4428	0.235412	0.355981	0.628172	0.133672	0.448573
A2A7F4_MOUSE|A2A7F4_S631	Infected-Uninfected	0.0594627	0.0684251	19.4428	0.395439	0.482103	0.402921	0.0594627	0.31686
A2A7F4_MOUSE|A2A7F4_S631	KO-WT	-0.123639	0.0615096	19.4428	0.0585043	0.124699	1.23281	0.123639	0.904136
A2A7F4_MOUSE|A2A7F4_S631	Early-Uninfected	0.0396102	0.0771939	19.4428	0.613645	0.688807	0.212083	0.0396102	0.161902
A2A7F4_MOUSE|A2A7F4_S631	Late-Uninfected	0.0793152	0.0771939	19.4428	0.316809	0.417057	0.499203	0.0793152	0.379804
A2A8V9_MOUSE|A2A8V9_S751	KO_Early-WT_Early	-0.345437	0.215426	8.44283	0.145508	0.321602	0.837113	0.345437	0.492681
A2A8V9_MOUSE|A2A8V9_S751	KO_Late-WT_Late	-0.440062	0.215426	8.44283	0.0735064	0.203117	1.13368	0.440062	0.692253
A2A8V9_MOUSE|A2A8V9_S751	KO_Uninfected-WT_Uninfected	-0.52805	0.263841	8.44283	0.0784717	0.273504	1.10529	0.52805	0.563036
A2A8V9_MOUSE|A2A8V9_S751	KO_Early-KO_Uninfected	-0.245828	0.215426	8.44283	0.285149	0.418085	0.544929	0.245828	0.378735
A2A8V9_MOUSE|A2A8V9_S751	KO_Late-KO_Uninfected	-0.462907	0.215426	8.44283	0.0621257	0.141204	1.20673	0.462907	0.850151
A2A8V9_MOUSE|A2A8V9_S751	WT_Early-Wt_Uninfected	-0.428442	0.263841	8.44283	0.141078	0.234804	0.850542	0.428442	0.629295
A2A8V9_MOUSE|A2A8V9_S751	WT_Late-Wt_Uninfected	-0.550896	0.263841	8.44283	0.0684245	0.140656	1.16479	0.550896	0.851841
A2A8V9_MOUSE|A2A8V9_S751	Infected-Uninfected	-0.422018	0.152329	8.44283	0.0230687	0.0450561	1.63698	0.422018	1.34625
A2A8V9_MOUSE|A2A8V9_S751	KO-WT	-0.43785	0.134341	8.44283	0.0107284	0.0353958	1.96947	0.43785	1.45105
A2A8V9_MOUSE|A2A8V9_S751	Early-Uninfected	-0.337135	0.170309	8.44283	0.0812227	0.133297	1.09032	0.337135	0.87518
A2A8V9_MOUSE|A2A8V9_S751	Late-Uninfected	-0.506901	0.170309	8.44283	0.0166668	0.0385449	1.77815	0.506901	1.41403
A2A8V9_MOUSE|A2A8V9_S751_S753	KO_Early-WT_Early	-0.553479	0.462698	19.4428	0.246003	0.442857	0.60906	0.553479	0.353736
A2A8V9_MOUSE|A2A8V9_S751_S753	KO_Late-WT_Late	-0.712087	0.462698	19.4428	0.139924	0.306895	0.854108	0.712087	0.51301
A2A8V9_MOUSE|A2A8V9_S751_S753	KO_Uninfected-WT_Uninfected	-0.114429	0.534277	19.4428	0.832641	0.923846	0.0795421	0.114429	0.0344004
A2A8V9_MOUSE|A2A8V9_S751_S753	KO_Early-KO_Uninfected	0.0504593	0.499771	19.4428	0.920612	0.949375	0.0359232	0.0504593	0.0225622
A2A8V9_MOUSE|A2A8V9_S751_S753	KO_Late-KO_Uninfected	-0.13732	0.499771	19.4428	0.786394	0.863741	0.10436	0.13732	0.0636162
A2A8V9_MOUSE|A2A8V9_S751_S753	WT_Early-Wt_Uninfected	0.48951	0.499771	19.4428	0.339379	0.459197	0.469315	0.48951	0.338001
A2A8V9_MOUSE|A2A8V9_S751_S753	WT_Late-Wt_Uninfected	0.460338	0.499771	19.4428	0.368288	0.495519	0.433813	0.460338	0.30494
A2A8V9_MOUSE|A2A8V9_S751_S753	Infected-Uninfected	0.215747	0.313248	19.4428	0.499123	0.580361	0.301793	0.215747	0.236302
A2A8V9_MOUSE|A2A8V9_S751_S753	KO-WT	-0.459998	0.281589	19.4428	0.118436	0.21241	0.926516	0.459998	0.672825
A2A8V9_MOUSE|A2A8V9_S751_S753	Early-Uninfected	0.269985	0.353391	19.4428	0.45405	0.543648	0.342896	0.269985	0.264682
A2A8V9_MOUSE|A2A8V9_S751_S753	Late-Uninfected	0.161509	0.353391	19.4428	0.652718	0.732209	0.185274	0.161509	0.135365
A2A8V9_MOUSE|A2A8V9_S751_S756	KO_Early-WT_Early	-0.318562	0.168041	8.44283	0.0926589	0.243625	1.03311	0.318562	0.613279
A2A8V9_MOUSE|A2A8V9_S751_S756	KO_Late-WT_Late	-0.267962	0.168041	8.44283	0.147482	0.317351	0.831261	0.267962	0.49846
A2A8V9_MOUSE|A2A8V9_S751_S756	KO_Uninfected-WT_Uninfected	-0.161872	0.205807	8.44283	0.453072	0.693749	0.343833	0.161872	0.158798
A2A8V9_MOUSE|A2A8V9_S751_S756	KO_Early-KO_Uninfected	-0.390557	0.168041	8.44283	0.0469789	0.10377	1.3281	0.390557	0.983926
A2A8V9_MOUSE|A2A8V9_S751_S756	KO_Late-KO_Uninfected	-0.471049	0.168041	8.44283	0.0219025	0.0645137	1.65951	0.471049	1.19035
A2A8V9_MOUSE|A2A8V9_S751_S756	WT_Early-Wt_Uninfected	-0.233866	0.205807	8.44283	0.28704	0.40479	0.542058	0.233866	0.39277
A2A8V9_MOUSE|A2A8V9_S751_S756	WT_Late-Wt_Uninfected	-0.364958	0.205807	8.44283	0.11214	0.204223	0.950238	0.364958	0.689895
A2A8V9_MOUSE|A2A8V9_S751_S756	Infected-Uninfected	-0.365107	0.118823	8.44283	0.0143323	0.0301185	1.84368	0.365107	1.52117
A2A8V9_MOUSE|A2A8V9_S751_S756	KO-WT	-0.249465	0.104792	8.44283	0.0429334	0.0985774	1.36721	0.249465	1.00622
A2A8V9_MOUSE|A2A8V9_S751_S756	Early-Uninfected	-0.312211	0.132848	8.44283	0.0450715	0.0812802	1.3461	0.312211	1.09002
A2A8V9_MOUSE|A2A8V9_S751_S756	Late-Uninfected	-0.418003	0.132848	8.44283	0.0127756	0.0309669	1.89362	0.418003	1.5091
A2A8V9_MOUSE|A2A8V9_S753	KO_Early-WT_Early	-0.412842	0.224617	8.44283	0.101414	0.257746	0.993903	0.412842	0.588807
A2A8V9_MOUSE|A2A8V9_S753	KO_Late-WT_Late	-0.568462	0.224617	8.44283	0.0337777	0.124401	1.47137	0.568462	0.905177
A2A8V9_MOUSE|A2A8V9_S753	KO_Uninfected-WT_Uninfected	-0.475084	0.275098	8.44283	0.120466	0.344543	0.919134	0.475084	0.462757
A2A8V9_MOUSE|A2A8V9_S753	KO_Early-KO_Uninfected	-0.333027	0.224617	8.44283	0.174504	0.287603	0.758195	0.333027	0.541206
A2A8V9_MOUSE|A2A8V9_S753	KO_Late-KO_Uninfected	-0.584811	0.224617	8.44283	0.0300764	0.0819509	1.52177	0.584811	1.08645
A2A8V9_MOUSE|A2A8V9_S753	WT_Early-Wt_Uninfected	-0.395269	0.275098	8.44283	0.18677	0.291472	0.728692	0.395269	0.535403
A2A8V9_MOUSE|A2A8V9_S753	WT_Late-Wt_Uninfected	-0.491432	0.275098	8.44283	0.109888	0.201196	0.959052	0.491432	0.696381
A2A8V9_MOUSE|A2A8V9_S753	Infected-Uninfected	-0.451135	0.158828	8.44283	0.0206498	0.0410265	1.68508	0.451135	1.38694
A2A8V9_MOUSE|A2A8V9_S753	KO-WT	-0.485462	0.140073	8.44283	0.00781982	0.027986	2.1068	0.485462	1.55306
A2A8V9_MOUSE|A2A8V9_S753	Early-Uninfected	-0.364148	0.177575	8.44283	0.0725911	0.121399	1.13912	0.364148	0.915784
A2A8V9_MOUSE|A2A8V9_S753	Late-Uninfected	-0.538121	0.177575	8.44283	0.0153129	0.0360024	1.81494	0.538121	1.44367
A2ACV6_MOUSE|A2ACV6_S173	KO_Early-WT_Early	-0.0603444	0.119266	19.4428	0.618571	0.772547	0.208611	0.0603444	0.112075
A2ACV6_MOUSE|A2ACV6_S173	KO_Late-WT_Late	-0.0618316	0.119266	19.4428	0.610006	0.759479	0.214666	0.0618316	0.119484
A2ACV6_MOUSE|A2ACV6_S173	KO_Uninfected-WT_Uninfected	-0.139923	0.137717	19.4428	0.322097	0.583805	0.492013	0.139923	0.233732
A2ACV6_MOUSE|A2ACV6_S173	KO_Early-KO_Uninfected	0.15411	0.128822	19.4428	0.245965	0.373926	0.609126	0.15411	0.427215
A2ACV6_MOUSE|A2ACV6_S173	KO_Late-KO_Uninfected	0.0342276	0.128822	19.4428	0.79327	0.867927	0.100579	0.0342276	0.0615166
A2ACV6_MOUSE|A2ACV6_S173	WT_Early-Wt_Uninfected	0.0745312	0.128822	19.4428	0.569529	0.673253	0.244484	0.0745312	0.171821
A2ACV6_MOUSE|A2ACV6_S173	WT_Late-Wt_Uninfected	-0.0438639	0.128822	19.4428	0.737132	0.815027	0.132455	0.0438639	0.088828
A2ACV6_MOUSE|A2ACV6_S173	Infected-Uninfected	0.0547512	0.0807436	19.4428	0.505707	0.58688	0.296101	0.0547512	0.231451
A2ACV6_MOUSE|A2ACV6_S173	KO-WT	-0.0873664	0.0725831	19.4428	0.243167	0.365591	0.614096	0.0873664	0.437004
A2ACV6_MOUSE|A2ACV6_S173	Early-Uninfected	0.114321	0.0910911	19.4428	0.22435	0.307262	0.649074	0.114321	0.512491
A2ACV6_MOUSE|A2ACV6_S173	Late-Uninfected	-0.00481815	0.0910911	19.4428	0.958356	0.970794	0.018473	0.00481815	0.0128729
A2ACV6_MOUSE|A2ACV6_S33	KO_Early-WT_Early	-0.0726549	0.114752	19.4428	0.534015	0.708423	0.272447	0.0726549	0.149707
A2ACV6_MOUSE|A2ACV6_S33	KO_Late-WT_Late	-0.0298691	0.114752	19.4428	0.797375	0.881767	0.0983374	0.0298691	0.0546459
A2ACV6_MOUSE|A2ACV6_S33	KO_Uninfected-WT_Uninfected	-0.093245	0.132504	19.4428	0.489954	0.721617	0.309845	0.093245	0.141693
A2ACV6_MOUSE|A2ACV6_S33	KO_Early-KO_Uninfected	-0.111056	0.123946	19.4428	0.381211	0.517313	0.418834	0.111056	0.286247
A2ACV6_MOUSE|A2ACV6_S33	KO_Late-KO_Uninfected	-0.340903	0.123946	19.4428	0.0125462	0.04226	1.90149	0.340903	1.37407
A2ACV6_MOUSE|A2ACV6_S33	WT_Early-Wt_Uninfected	-0.131646	0.123946	19.4428	0.301195	0.420044	0.521152	0.131646	0.376705
A2ACV6_MOUSE|A2ACV6_S33	WT_Late-Wt_Uninfected	-0.404278	0.123946	19.4428	0.00401252	0.0164161	2.39658	0.404278	1.78473
A2ACV6_MOUSE|A2ACV6_S33	Infected-Uninfected	-0.246971	0.0776875	19.4428	0.00483805	0.0120347	2.31533	0.246971	1.91956
A2ACV6_MOUSE|A2ACV6_S33	KO-WT	-0.0652563	0.0698358	19.4428	0.361546	0.489431	0.441836	0.0652563	0.310308
A2ACV6_MOUSE|A2ACV6_S33	Early-Uninfected	-0.121351	0.0876433	19.4428	0.181859	0.25953	0.740265	0.121351	0.585813
A2ACV6_MOUSE|A2ACV6_S33	Late-Uninfected	-0.372591	0.0876433	19.4428	0.000412886	0.00191103	3.38417	0.372591	2.71873
A2AEV7_MOUSE|A2AEV7_S283	KO_Early-WT_Early	-0.797467	0.164029	8.44283	0.00107385	0.0150125	2.96906	0.797467	1.82355
A2AEV7_MOUSE|A2AEV7_S283	KO_Late-WT_Late	-0.546813	0.164029	8.44283	0.00956785	0.0565194	2.01919	0.546813	1.2478
A2AEV7_MOUSE|A2AEV7_S283	KO_Uninfected-WT_Uninfected	-0.544314	0.200894	8.44283	0.0254134	0.145732	1.59494	0.544314	0.836445
A2AEV7_MOUSE|A2AEV7_S283	KO_Early-KO_Uninfected	-0.0473985	0.164029	8.44283	0.779578	0.853243	0.10814	0.0473985	0.0689271
A2AEV7_MOUSE|A2AEV7_S283	KO_Late-KO_Uninfected	-0.199455	0.164029	8.44283	0.256899	0.403275	0.590238	0.199455	0.394399
A2AEV7_MOUSE|A2AEV7_S283	WT_Early-Wt_Uninfected	0.205755	0.200894	8.44283	0.33419	0.453948	0.476007	0.205755	0.342994
A2AEV7_MOUSE|A2AEV7_S283	WT_Late-Wt_Uninfected	-0.196955	0.200894	8.44283	0.354147	0.481141	0.450816	0.196955	0.317728
A2AEV7_MOUSE|A2AEV7_S283	Infected-Uninfected	-0.0595134	0.115986	8.44283	0.62103	0.693577	0.206887	0.0595134	0.158906
A2AEV7_MOUSE|A2AEV7_S283	KO-WT	-0.629531	0.10229	8.44283	0.000218723	0.0020402	3.66011	0.629531	2.69033
A2AEV7_MOUSE|A2AEV7_S283	Early-Uninfected	0.0791783	0.129677	8.44283	0.557551	0.639074	0.253715	0.0791783	0.194449
A2AEV7_MOUSE|A2AEV7_S283	Late-Uninfected	-0.198205	0.129677	8.44283	0.162956	0.245388	0.787929	0.198205	0.610146
A2AHK0_MOUSE|A2AHK0_S37	KO_Early-WT_Early	-0.229873	0.164489	8.44283	0.197897	0.386192	0.703561	0.229873	0.413197
A2AHK0_MOUSE|A2AHK0_S37	KO_Late-WT_Late	-0.255808	0.164489	8.44283	0.156543	0.32939	0.805367	0.255808	0.482289
A2AHK0_MOUSE|A2AHK0_S37	KO_Uninfected-WT_Uninfected	-0.0358495	0.201457	8.44283	0.862958	0.938554	0.0640106	0.0358495	0.0275406
A2AHK0_MOUSE|A2AHK0_S37	KO_Early-KO_Uninfected	-0.500498	0.164489	8.44283	0.0150196	0.0420943	1.82334	0.500498	1.37578
A2AHK0_MOUSE|A2AHK0_S37	KO_Late-KO_Uninfected	-0.585881	0.164489	8.44283	0.00676237	0.0263063	2.1699	0.585881	1.57994
A2AHK0_MOUSE|A2AHK0_S37	WT_Early-Wt_Uninfected	-0.306475	0.201457	8.44283	0.164717	0.264744	0.783262	0.306475	0.577174
A2AHK0_MOUSE|A2AHK0_S37	WT_Late-Wt_Uninfected	-0.365923	0.201457	8.44283	0.104884	0.193885	0.979289	0.365923	0.712455
A2AHK0_MOUSE|A2AHK0_S37	Infected-Uninfected	-0.439694	0.116311	8.44283	0.00488086	0.0121185	2.3115	0.439694	1.91655
A2AHK0_MOUSE|A2AHK0_S37	KO-WT	-0.173843	0.102577	8.44283	0.126585	0.223987	0.897617	0.173843	0.649776
A2AHK0_MOUSE|A2AHK0_S37	Early-Uninfected	-0.403486	0.13004	8.44283	0.013675	0.0300366	1.86407	0.403486	1.52235
A2AHK0_MOUSE|A2AHK0_S37	Late-Uninfected	-0.475902	0.13004	8.44283	0.00583922	0.0163443	2.23364	0.475902	1.78663
A2AIX1_MOUSE|A2AIX1_S1028	KO_Early-WT_Early	0.164049	0.130009	19.4428	0.221938	0.415529	0.653769	0.164049	0.381398
A2AIX1_MOUSE|A2AIX1_S1028	KO_Late-WT_Late	0.308861	0.130009	19.4428	0.0279335	0.110195	1.55387	0.308861	0.957836
A2AIX1_MOUSE|A2AIX1_S1028	KO_Uninfected-WT_Uninfected	0.310241	0.150121	19.4428	0.0523514	0.217044	1.28107	0.310241	0.663451
A2AIX1_MOUSE|A2AIX1_S1028	KO_Early-KO_Uninfected	-0.496614	0.140426	19.4428	0.0021439	0.00885671	2.6688	0.496614	2.05273
A2AIX1_MOUSE|A2AIX1_S1028	KO_Late-KO_Uninfected	-0.412729	0.140426	19.4428	0.00827994	0.03073	2.08197	0.412729	1.51244
A2AIX1_MOUSE|A2AIX1_S1028	WT_Early-Wt_Uninfected	-0.350422	0.140426	19.4428	0.0217185	0.0545613	1.66317	0.350422	1.26312
A2AIX1_MOUSE|A2AIX1_S1028	WT_Late-Wt_Uninfected	-0.411348	0.140426	19.4428	0.00846258	0.0288339	2.0725	0.411348	1.5401
A2AIX1_MOUSE|A2AIX1_S1028	Infected-Uninfected	-0.417778	0.0880164	19.4428	0.000132424	0.000588186	3.87803	0.417778	3.23049
A2AIX1_MOUSE|A2AIX1_S1028	KO-WT	0.26105	0.0791208	19.4428	0.00368375	0.0160163	2.43371	0.26105	1.79544
A2AIX1_MOUSE|A2AIX1_S1028	Early-Uninfected	-0.423518	0.0992959	19.4428	0.000399773	0.00152523	3.39819	0.423518	2.81667
A2AIX1_MOUSE|A2AIX1_S1028	Late-Uninfected	-0.412038	0.0992959	19.4428	0.000521947	0.00230617	3.28237	0.412038	2.63711
A2AIX1_MOUSE|A2AIX1_S1030	KO_Early-WT_Early	0.215909	0.0985908	19.4428	0.0409075	0.146086	1.3882	0.215909	0.835391
A2AIX1_MOUSE|A2AIX1_S1030	KO_Late-WT_Late	0.253393	0.0985908	19.4428	0.018524	0.0854893	1.73226	0.253393	1.06809
A2AIX1_MOUSE|A2AIX1_S1030	KO_Uninfected-WT_Uninfected	0.0636109	0.113843	19.4428	0.582704	0.783874	0.234552	0.0636109	0.105754
A2AIX1_MOUSE|A2AIX1_S1030	KO_Early-KO_Uninfected	-0.295596	0.10649	19.4428	0.0118687	0.0347391	1.9256	0.295596	1.45918
A2AIX1_MOUSE|A2AIX1_S1030	KO_Late-KO_Uninfected	-0.258026	0.10649	19.4428	0.0253025	0.0720185	1.59684	0.258026	1.14256
A2AIX1_MOUSE|A2AIX1_S1030	WT_Early-Wt_Uninfected	-0.447894	0.10649	19.4428	0.000458301	0.00250766	3.33885	0.447894	2.60073
A2AIX1_MOUSE|A2AIX1_S1030	WT_Late-Wt_Uninfected	-0.447807	0.10649	19.4428	0.000459164	0.00323391	3.33803	0.447807	2.49027
A2AIX1_MOUSE|A2AIX1_S1030	Infected-Uninfected	-0.362331	0.0667463	19.4428	2.84831e-05	0.000162227	4.54541	0.362331	3.78988
A2AIX1_MOUSE|A2AIX1_S1030	KO-WT	0.177637	0.0600004	19.4428	0.0078941	0.0281958	2.1027	0.177637	1.54982
A2AIX1_MOUSE|A2AIX1_S1030	Early-Uninfected	-0.371745	0.0753	19.4428	8.58996e-05	0.000416945	4.06601	0.371745	3.37992
A2AIX1_MOUSE|A2AIX1_S1030	Late-Uninfected	-0.352916	0.0753	19.4428	0.000151799	0.000847432	3.81873	0.352916	3.0719
A2AIX1_MOUSE|A2AIX1_S1032	KO_Early-WT_Early	-0.0244102	0.167012	19.4428	0.885301	0.938731	0.0529092	0.0244102	0.027459
A2AIX1_MOUSE|A2AIX1_S1032	KO_Late-WT_Late	0.169467	0.167012	19.4428	0.322708	0.516782	0.49119	0.169467	0.286693
A2AIX1_MOUSE|A2AIX1_S1032	KO_Uninfected-WT_Uninfected	-0.234991	0.192848	19.4428	0.237603	0.49626	0.624148	0.234991	0.304291
A2AIX1_MOUSE|A2AIX1_S1032	KO_Early-KO_Uninfected	-0.359959	0.180393	19.4428	0.060202	0.126213	1.22039	0.359959	0.898896
A2AIX1_MOUSE|A2AIX1_S1032	KO_Late-KO_Uninfected	-0.0957482	0.180393	19.4428	0.601585	0.727176	0.220703	0.0957482	0.13836
A2AIX1_MOUSE|A2AIX1_S1032	WT_Early-Wt_Uninfected	-0.57054	0.180393	19.4428	0.00501896	0.0169677	2.29939	0.57054	1.77038
A2AIX1_MOUSE|A2AIX1_S1032	WT_Late-Wt_Uninfected	-0.500207	0.180393	19.4428	0.0119452	0.0371653	1.92281	0.500207	1.42986
A2AIX1_MOUSE|A2AIX1_S1032	Infected-Uninfected	-0.381614	0.113067	19.4428	0.00310073	0.00828625	2.50854	0.381614	2.08164
A2AIX1_MOUSE|A2AIX1_S1032	KO-WT	-0.029978	0.10164	19.4428	0.771164	0.843018	0.112853	0.029978	0.0741634
A2AIX1_MOUSE|A2AIX1_S1032	Early-Uninfected	-0.46525	0.127557	19.4428	0.001662	0.00508071	2.77937	0.46525	2.29408
A2AIX1_MOUSE|A2AIX1_S1032	Late-Uninfected	-0.297977	0.127557	19.4428	0.0303328	0.0631375	1.51809	0.297977	1.19971
A2AIX1_MOUSE|A2AIX1_S1223	KO_Early-WT_Early	0.338808	0.184043	19.4428	0.0809459	0.224141	1.09181	0.338808	0.649478
A2AIX1_MOUSE|A2AIX1_S1223	KO_Late-WT_Late	0.477658	0.184043	19.4428	0.0175496	0.0826412	1.75573	0.477658	1.0828
A2AIX1_MOUSE|A2AIX1_S1223	KO_Uninfected-WT_Uninfected	0.802864	0.212514	19.4428	0.00123057	0.0279405	2.90989	0.802864	1.55377
A2AIX1_MOUSE|A2AIX1_S1223	KO_Early-KO_Uninfected	-0.661074	0.198789	19.4428	0.0034714	0.0129947	2.4595	0.661074	1.88623
A2AIX1_MOUSE|A2AIX1_S1223	KO_Late-KO_Uninfected	-0.564107	0.198789	19.4428	0.0103608	0.0365783	1.98461	0.564107	1.43678
A2AIX1_MOUSE|A2AIX1_S1223	WT_Early-Wt_Uninfected	-0.197018	0.198789	19.4428	0.333816	0.453568	0.476493	0.197018	0.343358
A2AIX1_MOUSE|A2AIX1_S1223	WT_Late-Wt_Uninfected	-0.238901	0.198789	19.4428	0.243881	0.365619	0.612821	0.238901	0.436971
A2AIX1_MOUSE|A2AIX1_S1223	Infected-Uninfected	-0.415275	0.124598	19.4428	0.00341326	0.00899934	2.46683	0.415275	2.04579
A2AIX1_MOUSE|A2AIX1_S1223	KO-WT	0.539777	0.112005	19.4428	0.00011222	0.00126338	3.94993	0.539777	2.89847
A2AIX1_MOUSE|A2AIX1_S1223	Early-Uninfected	-0.429046	0.140565	19.4428	0.00643322	0.0158946	2.19157	0.429046	1.79875
A2AIX1_MOUSE|A2AIX1_S1223	Late-Uninfected	-0.401504	0.140565	19.4428	0.00994395	0.0252515	2.00244	0.401504	1.59771
A2AIX1_MOUSE|A2AIX1_S1239	KO_Early-WT_Early	0.284582	0.0834964	19.4429	0.00287449	0.0284091	2.54144	0.284582	1.54654
A2AIX1_MOUSE|A2AIX1_S1239	KO_Late-WT_Late	0.146426	0.0834964	19.4429	0.0952356	0.239105	1.0212	0.146426	0.621411
A2AIX1_MOUSE|A2AIX1_S1239	KO_Uninfected-WT_Uninfected	0.171914	0.0964134	19.4429	0.0901912	0.2944	1.04484	0.171914	0.531062
A2AIX1_MOUSE|A2AIX1_S1239	KO_Early-KO_Uninfected	0.0094883	0.0901864	19.4429	0.917289	0.946932	0.0374939	0.0094883	0.0236811
A2AIX1_MOUSE|A2AIX1_S1239	KO_Late-KO_Uninfected	0.0965944	0.0901864	19.4429	0.297262	0.447776	0.52686	0.0965944	0.348939
A2AIX1_MOUSE|A2AIX1_S1239	WT_Early-Wt_Uninfected	-0.103179	0.0901864	19.4429	0.266486	0.382646	0.574326	0.103179	0.417203
A2AIX1_MOUSE|A2AIX1_S1239	WT_Late-Wt_Uninfected	0.122082	0.0901864	19.4429	0.191372	0.305347	0.718122	0.122082	0.515206
A2AIX1_MOUSE|A2AIX1_S1239	Infected-Uninfected	0.0312463	0.0565273	19.4429	0.586724	0.663106	0.231566	0.0312463	0.178417
A2AIX1_MOUSE|A2AIX1_S1239	KO-WT	0.200974	0.0508143	19.4429	0.000817787	0.0052896	3.08736	0.200974	2.27658
A2AIX1_MOUSE|A2AIX1_S1239	Early-Uninfected	-0.0468456	0.0637714	19.4429	0.47136	0.559801	0.326647	0.0468456	0.251966
A2AIX1_MOUSE|A2AIX1_S1239	Late-Uninfected	0.109338	0.0637714	19.4429	0.102328	0.169067	0.990006	0.109338	0.771942
A2AIX1_MOUSE|A2AIX1_S1242_S1245	KO_Early-WT_Early	0.202288	0.138748	8.44283	0.181023	0.365906	0.742267	0.202288	0.43663
A2AIX1_MOUSE|A2AIX1_S1242_S1245	KO_Late-WT_Late	0.470782	0.138748	8.44283	0.00873554	0.0532496	2.05871	0.470782	1.27368
A2AIX1_MOUSE|A2AIX1_S1242_S1245	KO_Uninfected-WT_Uninfected	0.233744	0.169931	8.44283	0.204357	0.458017	0.689611	0.233744	0.339118
A2AIX1_MOUSE|A2AIX1_S1242_S1245	KO_Early-KO_Uninfected	-0.367993	0.138748	8.44283	0.0278339	0.0689732	1.55543	0.367993	1.16132
A2AIX1_MOUSE|A2AIX1_S1242_S1245	KO_Late-KO_Uninfected	-0.0951132	0.138748	8.44283	0.511402	0.654283	0.291238	0.0951132	0.184234
A2AIX1_MOUSE|A2AIX1_S1242_S1245	WT_Early-Wt_Uninfected	-0.336537	0.169931	8.44283	0.0811089	0.152867	1.09093	0.336537	0.815685
A2AIX1_MOUSE|A2AIX1_S1242_S1245	WT_Late-Wt_Uninfected	-0.33215	0.169931	8.44283	0.084475	0.164976	1.07327	0.33215	0.782578
A2AIX1_MOUSE|A2AIX1_S1242_S1245	Infected-Uninfected	-0.282949	0.0981095	8.44283	0.0192753	0.0386841	1.715	0.282949	1.41247
A2AIX1_MOUSE|A2AIX1_S1242_S1245	KO-WT	0.302271	0.0865245	8.44283	0.00749801	0.0270997	2.12505	0.302271	1.56704
A2AIX1_MOUSE|A2AIX1_S1242_S1245	Early-Uninfected	-0.352265	0.10969	8.44283	0.0115502	0.0261113	1.93741	0.352265	1.58317
A2AIX1_MOUSE|A2AIX1_S1242_S1245	Late-Uninfected	-0.213632	0.10969	8.44283	0.0854137	0.146298	1.06847	0.213632	0.834761
A2AIX1_MOUSE|A2AIX1_S1245	KO_Early-WT_Early	0.584606	0.118084	19.4428	8.32382e-05	0.0028245	4.07968	0.584606	2.54906
A2AIX1_MOUSE|A2AIX1_S1245	KO_Late-WT_Late	0.510506	0.118084	19.4428	0.000349744	0.00676717	3.45625	0.510506	2.16959
A2AIX1_MOUSE|A2AIX1_S1245	KO_Uninfected-WT_Uninfected	0.207162	0.136352	19.4428	0.144778	0.379257	0.839299	0.207162	0.421066
A2AIX1_MOUSE|A2AIX1_S1245	KO_Early-KO_Uninfected	-0.0591682	0.127546	19.4428	0.647873	0.752523	0.18851	0.0591682	0.12348
A2AIX1_MOUSE|A2AIX1_S1245	KO_Late-KO_Uninfected	0.0237221	0.127546	19.4428	0.85438	0.907838	0.0683489	0.0237221	0.0419917
A2AIX1_MOUSE|A2AIX1_S1245	WT_Early-Wt_Uninfected	-0.436612	0.127546	19.4428	0.00277859	0.0105621	2.55618	0.436612	1.97625
A2AIX1_MOUSE|A2AIX1_S1245	WT_Late-Wt_Uninfected	-0.279622	0.127546	19.4428	0.0407112	0.0946535	1.39029	0.279622	1.02386
A2AIX1_MOUSE|A2AIX1_S1245	Infected-Uninfected	-0.18792	0.0799436	19.4428	0.0294265	0.0552481	1.53126	0.18792	1.25768
A2AIX1_MOUSE|A2AIX1_S1245	KO-WT	0.434091	0.0718639	19.4428	7.47252e-06	0.000168519	5.12653	0.434091	3.77335
A2AIX1_MOUSE|A2AIX1_S1245	Early-Uninfected	-0.24789	0.0901885	19.4428	0.0125964	0.0280686	1.89975	0.24789	1.55178
A2AIX1_MOUSE|A2AIX1_S1245	Late-Uninfected	-0.12795	0.0901885	19.4428	0.17182	0.256074	0.764927	0.12795	0.591635
A2AIX1_MOUSE|A2AIX1_S1374	KO_Early-WT_Early	0.0962014	0.146673	8.44283	0.529361	0.704696	0.276248	0.0962014	0.151998
A2AIX1_MOUSE|A2AIX1_S1374	KO_Late-WT_Late	0.117657	0.146673	8.44283	0.444445	0.62849	0.352182	0.117657	0.201701
A2AIX1_MOUSE|A2AIX1_S1374	KO_Uninfected-WT_Uninfected	0.0133252	0.179637	8.44283	0.942596	0.975616	0.0256745	0.0133252	0.0107212
A2AIX1_MOUSE|A2AIX1_S1374	KO_Early-KO_Uninfected	-0.254012	0.146673	8.44283	0.119567	0.214988	0.92239	0.254012	0.667585
A2AIX1_MOUSE|A2AIX1_S1374	KO_Late-KO_Uninfected	-0.235418	0.146673	8.44283	0.145168	0.265574	0.838129	0.235418	0.575815
A2AIX1_MOUSE|A2AIX1_S1374	WT_Early-Wt_Uninfected	-0.336888	0.179637	8.44283	0.0956603	0.173709	1.01927	0.336888	0.760179
A2AIX1_MOUSE|A2AIX1_S1374	WT_Late-Wt_Uninfected	-0.33975	0.179637	8.44283	0.0933041	0.177658	1.0301	0.33975	0.750415
A2AIX1_MOUSE|A2AIX1_S1374	Infected-Uninfected	-0.291517	0.103714	8.44283	0.0216402	0.042646	1.66474	0.291517	1.37012
A2AIX1_MOUSE|A2AIX1_S1374	KO-WT	0.0757279	0.0914668	8.44283	0.430492	0.556643	0.366035	0.0757279	0.254423
A2AIX1_MOUSE|A2AIX1_S1374	Early-Uninfected	-0.29545	0.115955	8.44283	0.0328659	0.0623744	1.48325	0.29545	1.20499
A2AIX1_MOUSE|A2AIX1_S1374	Late-Uninfected	-0.287584	0.115955	8.44283	0.0366234	0.0734244	1.43624	0.287584	1.13416
A2AIX1_MOUSE|A2AIX1_S1377	KO_Early-WT_Early	0.388985	0.215527	19.4428	0.0866171	0.233747	1.0624	0.388985	0.631253
A2AIX1_MOUSE|A2AIX1_S1377	KO_Late-WT_Late	0.49218	0.215527	19.4428	0.0337971	0.124426	1.47112	0.49218	0.905089
A2AIX1_MOUSE|A2AIX1_S1377	KO_Uninfected-WT_Uninfected	0.493067	0.248869	19.4428	0.0618868	0.238808	1.2084	0.493067	0.621952
A2AIX1_MOUSE|A2AIX1_S1377	KO_Early-KO_Uninfected	-0.251368	0.232796	19.4428	0.293453	0.427452	0.532461	0.251368	0.369113
A2AIX1_MOUSE|A2AIX1_S1377	KO_Late-KO_Uninfected	-0.369082	0.232796	19.4428	0.128998	0.244089	0.889417	0.369082	0.612451
A2AIX1_MOUSE|A2AIX1_S1377	WT_Early-Wt_Uninfected	-0.147286	0.232796	19.4428	0.534311	0.642413	0.272206	0.147286	0.192185
A2AIX1_MOUSE|A2AIX1_S1377	WT_Late-Wt_Uninfected	-0.368195	0.232796	19.4428	0.129867	0.228501	0.886501	0.368195	0.641111
A2AIX1_MOUSE|A2AIX1_S1377	Infected-Uninfected	-0.283983	0.145912	19.4428	0.0662215	0.109473	1.179	0.283983	0.960692
A2AIX1_MOUSE|A2AIX1_S1377	KO-WT	0.458077	0.131166	19.4428	0.00237202	0.0115433	2.62488	0.458077	1.93767
A2AIX1_MOUSE|A2AIX1_S1377	Early-Uninfected	-0.199327	0.164611	19.4428	0.24045	0.325144	0.618976	0.199327	0.487925
A2AIX1_MOUSE|A2AIX1_S1377	Late-Uninfected	-0.368639	0.164611	19.4428	0.0369948	0.0739925	1.43186	0.368639	1.13081
A2AIX1_MOUSE|A2AIX1_S467	KO_Early-WT_Early	0.033081	0.158935	8.44283	0.840053	0.913893	0.0756936	0.033081	0.0391047
A2AIX1_MOUSE|A2AIX1_S467	KO_Late-WT_Late	-0.421531	0.158935	8.44283	0.0278351	0.109993	1.55541	0.421531	0.958637
A2AIX1_MOUSE|A2AIX1_S467	KO_Uninfected-WT_Uninfected	0.482145	0.194655	8.44283	0.0368117	0.177942	1.43401	0.482145	0.749722
A2AIX1_MOUSE|A2AIX1_S467	KO_Early-KO_Uninfected	-0.207407	0.158935	8.44283	0.226343	0.351061	0.645233	0.207407	0.454617
A2AIX1_MOUSE|A2AIX1_S467	KO_Late-KO_Uninfected	-0.564797	0.158935	8.44283	0.00684638	0.0265553	2.16454	0.564797	1.57585
A2AIX1_MOUSE|A2AIX1_S467	WT_Early-Wt_Uninfected	0.241656	0.194655	8.44283	0.247818	0.361729	0.605867	0.241656	0.441617
A2AIX1_MOUSE|A2AIX1_S467	WT_Late-Wt_Uninfected	0.338879	0.194655	8.44283	0.1179	0.212198	0.928487	0.338879	0.673259
A2AIX1_MOUSE|A2AIX1_S467	Infected-Uninfected	-0.0479174	0.112384	8.44283	0.680501	0.745562	0.167171	0.0479174	0.127516
A2AIX1_MOUSE|A2AIX1_S467	KO-WT	0.0312314	0.0991135	8.44283	0.760328	0.834769	0.118999	0.0312314	0.0784335
A2AIX1_MOUSE|A2AIX1_S467	Early-Uninfected	0.0171245	0.125649	8.44283	0.894788	0.921206	0.04828	0.0171245	0.0356432
A2AIX1_MOUSE|A2AIX1_S467	Late-Uninfected	-0.112959	0.125649	8.44283	0.393568	0.495023	0.40498	0.112959	0.305375
A2AIX1_MOUSE|A2AIX1_S554	KO_Early-WT_Early	0.681191	0.155974	8.44283	0.00210083	0.0231394	2.67761	0.681191	1.63565
A2AIX1_MOUSE|A2AIX1_S554	KO_Late-WT_Late	0.934343	0.155974	8.44283	0.000264351	0.00566737	3.57782	0.934343	2.24662
A2AIX1_MOUSE|A2AIX1_S554	KO_Uninfected-WT_Uninfected	0.376719	0.191028	8.44283	0.0821876	0.280864	1.08519	0.376719	0.551504
A2AIX1_MOUSE|A2AIX1_S554	KO_Early-KO_Uninfected	0.566029	0.155974	8.44283	0.00611327	0.020481	2.21373	0.566029	1.68865
A2AIX1_MOUSE|A2AIX1_S554	KO_Late-KO_Uninfected	0.667846	0.155974	8.44283	0.00236813	0.0117493	2.62559	0.667846	1.92999
A2AIX1_MOUSE|A2AIX1_S554	WT_Early-Wt_Uninfected	0.261557	0.191028	8.44283	0.20625	0.314477	0.685606	0.261557	0.502411
A2AIX1_MOUSE|A2AIX1_S554	WT_Late-Wt_Uninfected	0.110222	0.191028	8.44283	0.579	0.68693	0.237322	0.110222	0.163087
A2AIX1_MOUSE|A2AIX1_S554	Infected-Uninfected	0.401414	0.11029	8.44283	0.00601689	0.0144331	2.22063	0.401414	1.84064
A2AIX1_MOUSE|A2AIX1_S554	KO-WT	0.664084	0.0972669	8.44283	0.000104024	0.00119951	3.98286	0.664084	2.92099
A2AIX1_MOUSE|A2AIX1_S554	Early-Uninfected	0.413793	0.123308	8.44283	0.00924869	0.0216017	2.03392	0.413793	1.66551
A2AIX1_MOUSE|A2AIX1_S554	Late-Uninfected	0.389034	0.123308	8.44283	0.012608	0.030652	1.89935	0.389034	1.51354
A2AIX1_MOUSE|A2AIX1_Y1027	KO_Early-WT_Early	0.304221	0.10178	19.4428	0.0074106	0.0508951	2.13015	0.304221	1.29332
A2AIX1_MOUSE|A2AIX1_Y1027	KO_Late-WT_Late	0.447908	0.10178	19.4428	0.000292597	0.00605661	3.53373	0.447908	2.21777
A2AIX1_MOUSE|A2AIX1_Y1027	KO_Uninfected-WT_Uninfected	0.192098	0.117526	19.4428	0.118238	0.341424	0.927244	0.192098	0.466706
A2AIX1_MOUSE|A2AIX1_Y1027	KO_Early-KO_Uninfected	-0.541246	0.109935	19.4428	8.85817e-05	0.000680468	4.05266	0.541246	3.16719
A2AIX1_MOUSE|A2AIX1_Y1027	KO_Late-KO_Uninfected	-0.463069	0.109935	19.4428	0.000451767	0.00333421	3.34509	0.463069	2.47701
A2AIX1_MOUSE|A2AIX1_Y1027	WT_Early-Wt_Uninfected	-0.653368	0.109935	19.4428	9.21601e-06	0.000112462	5.03546	0.653368	3.949
A2AIX1_MOUSE|A2AIX1_Y1027	WT_Late-Wt_Uninfected	-0.718878	0.109935	19.4428	2.59878e-06	6.38444e-05	5.58523	0.718878	4.19488
A2AIX1_MOUSE|A2AIX1_Y1027	Infected-Uninfected	-0.59414	0.0689057	19.4428	4.50456e-08	7.14242e-07	7.34635	0.59414	6.14615
A2AIX1_MOUSE|A2AIX1_Y1027	KO-WT	0.314742	0.0619416	19.4428	6.1966e-05	0.000829713	4.20785	0.314742	3.08107
A2AIX1_MOUSE|A2AIX1_Y1027	Early-Uninfected	-0.597307	0.0777361	19.4428	2.6061e-07	3.23338e-06	6.58401	0.597307	5.49034
A2AIX1_MOUSE|A2AIX1_Y1027	Late-Uninfected	-0.590974	0.0777361	19.4428	3.0517e-07	5.28773e-06	6.51546	0.590974	5.27673
A2AM80_MOUSE|A2AM80_T71_Y72_T73_Y76_T82_T91	KO_Early-WT_Early	0.194545	0.119882	8.44283	0.141306	0.316479	0.84984	0.194545	0.499655
A2AM80_MOUSE|A2AM80_T71_Y72_T73_Y76_T82_T91	KO_Late-WT_Late	0.123273	0.119882	8.44283	0.332371	0.527061	0.478376	0.123273	0.278139
A2AM80_MOUSE|A2AM80_T71_Y72_T73_Y76_T82_T91	KO_Uninfected-WT_Uninfected	0.158628	0.146825	8.44283	0.309863	0.57252	0.50883	0.158628	0.24221
A2AM80_MOUSE|A2AM80_T71_Y72_T73_Y76_T82_T91	KO_Early-KO_Uninfected	0.0555688	0.119882	8.44283	0.654702	0.757905	0.183956	0.0555688	0.120385
A2AM80_MOUSE|A2AM80_T71_Y72_T73_Y76_T82_T91	KO_Late-KO_Uninfected	0.105162	0.119882	8.44283	0.404641	0.556609	0.39293	0.105162	0.25445
A2AM80_MOUSE|A2AM80_T71_Y72_T73_Y76_T82_T91	WT_Early-Wt_Uninfected	0.0196521	0.146825	8.44283	0.89666	0.928852	0.0473724	0.0196521	0.0320536
A2AM80_MOUSE|A2AM80_T71_Y72_T73_Y76_T82_T91	WT_Late-Wt_Uninfected	0.140517	0.146825	8.44283	0.365149	0.492624	0.43753	0.140517	0.307484
A2AM80_MOUSE|A2AM80_T71_Y72_T73_Y76_T82_T91	Infected-Uninfected	0.080225	0.0847696	8.44283	0.370246	0.4566	0.43151	0.080225	0.340464
A2AM80_MOUSE|A2AM80_T71_Y72_T73_Y76_T82_T91	KO-WT	0.158815	0.0747598	8.44283	0.0645876	0.134694	1.18985	0.158815	0.870653
A2AM80_MOUSE|A2AM80_T71_Y72_T73_Y76_T82_T91	Early-Uninfected	0.0376105	0.0947753	8.44283	0.70133	0.764726	0.154078	0.0376105	0.116494
A2AM80_MOUSE|A2AM80_T71_Y72_T73_Y76_T82_T91	Late-Uninfected	0.12284	0.0947753	8.44283	0.229243	0.32264	0.639704	0.12284	0.491282
A2AMH5_MOUSE|A2AMH5_S655	KO_Early-WT_Early	-0.479054	0.16454	8.44283	0.0184581	0.0888822	1.73381	0.479054	1.05119
A2AMH5_MOUSE|A2AMH5_S655	KO_Late-WT_Late	-0.36448	0.16454	8.44283	0.0559005	0.171459	1.25258	0.36448	0.76584
A2AMH5_MOUSE|A2AMH5_S655	KO_Uninfected-WT_Uninfected	-0.154258	0.201519	8.44283	0.464848	0.702533	0.332689	0.154258	0.153334
A2AMH5_MOUSE|A2AMH5_S655	KO_Early-KO_Uninfected	-0.0865036	0.16454	8.44283	0.612601	0.724062	0.212822	0.0865036	0.140224
A2AMH5_MOUSE|A2AMH5_S655	KO_Late-KO_Uninfected	0.226947	0.16454	8.44283	0.203238	0.340745	0.691995	0.226947	0.467571
A2AMH5_MOUSE|A2AMH5_S655	WT_Early-Wt_Uninfected	0.238292	0.201519	8.44283	0.269245	0.385683	0.569853	0.238292	0.413769
A2AMH5_MOUSE|A2AMH5_S655	WT_Late-Wt_Uninfected	0.437169	0.201519	8.44283	0.0601265	0.127538	1.22093	0.437169	0.89436
A2AMH5_MOUSE|A2AMH5_S655	Infected-Uninfected	0.203976	0.116347	8.44283	0.115689	0.17468	0.936708	0.203976	0.757757
A2AMH5_MOUSE|A2AMH5_S655	KO-WT	-0.332597	0.102608	8.44283	0.0110275	0.0361414	1.95752	0.332597	1.442
A2AMH5_MOUSE|A2AMH5_S655	Early-Uninfected	0.0758943	0.13008	8.44283	0.574846	0.654233	0.240448	0.0758943	0.184268
A2AMH5_MOUSE|A2AMH5_S655	Late-Uninfected	0.332058	0.13008	8.44283	0.0326171	0.0668838	1.48655	0.332058	1.17468
A2AN45_MOUSE|A2AN45_S43	KO_Early-WT_Early	-0.0697288	0.124581	19.4428	0.582071	0.746145	0.235024	0.0697288	0.127177
A2AN45_MOUSE|A2AN45_S43	KO_Late-WT_Late	0.0445317	0.124581	19.4428	0.724605	0.837477	0.139899	0.0445317	0.0770269
A2AN45_MOUSE|A2AN45_S43	KO_Uninfected-WT_Uninfected	0.268435	0.143854	19.4428	0.0771972	0.271088	1.1124	0.268435	0.566889
A2AN45_MOUSE|A2AN45_S43	KO_Early-KO_Uninfected	-0.206796	0.134563	19.4428	0.140457	0.243915	0.852456	0.206796	0.612761
A2AN45_MOUSE|A2AN45_S43	KO_Late-KO_Uninfected	-0.141656	0.134563	19.4428	0.305381	0.456325	0.515157	0.141656	0.340726
A2AN45_MOUSE|A2AN45_S43	WT_Early-Wt_Uninfected	0.131368	0.134563	19.4428	0.34093	0.460874	0.467335	0.131368	0.336417
A2AN45_MOUSE|A2AN45_S43	WT_Late-Wt_Uninfected	0.0822475	0.134563	19.4428	0.548134	0.659656	0.261113	0.0822475	0.180683
A2AN45_MOUSE|A2AN45_S43	Infected-Uninfected	-0.0337093	0.0843418	19.4428	0.693753	0.757053	0.158795	0.0337093	0.120874
A2AN45_MOUSE|A2AN45_S43	KO-WT	0.0810793	0.0758176	19.4428	0.297987	0.424472	0.525802	0.0810793	0.372151
A2AN45_MOUSE|A2AN45_S43	Early-Uninfected	-0.0377144	0.0951504	19.4428	0.696151	0.760362	0.157296	0.0377144	0.11898
A2AN45_MOUSE|A2AN45_S43	Late-Uninfected	-0.0297042	0.0951504	19.4428	0.758226	0.81872	0.120201	0.0297042	0.0868645
A2ANY6_MOUSE|A2ANY6_S4827	KO_Early-WT_Early	-0.830714	0.372978	19.4428	0.0379261	0.13959	1.42106	0.830714	0.855145
A2ANY6_MOUSE|A2ANY6_S4827	KO_Late-WT_Late	-0.775781	0.372978	19.4428	0.0509854	0.162205	1.29255	0.775781	0.789937
A2ANY6_MOUSE|A2ANY6_S4827	KO_Uninfected-WT_Uninfected	-0.430682	0.430678	19.4428	0.32959	0.590912	0.482027	0.430682	0.228477
A2ANY6_MOUSE|A2ANY6_S4827	KO_Early-KO_Uninfected	-0.234641	0.402862	19.4428	0.566968	0.685825	0.246441	0.234641	0.163786
A2ANY6_MOUSE|A2ANY6_S4827	KO_Late-KO_Uninfected	-0.161716	0.402862	19.4428	0.692491	0.797657	0.159586	0.161716	0.0981838
A2ANY6_MOUSE|A2ANY6_S4827	WT_Early-Wt_Uninfected	0.165391	0.402862	19.4428	0.6859	0.77083	0.163739	0.165391	0.113041
A2ANY6_MOUSE|A2ANY6_S4827	WT_Late-Wt_Uninfected	0.183382	0.402862	19.4428	0.654009	0.749676	0.184417	0.183382	0.125127
A2ANY6_MOUSE|A2ANY6_S4827	Infected-Uninfected	-0.0118959	0.252507	19.4428	0.962905	0.972082	0.0164165	0.0118959	0.0122972
A2ANY6_MOUSE|A2ANY6_S4827	KO-WT	-0.679059	0.226987	19.4428	0.00736731	0.026777	2.13269	0.679059	1.57224
A2ANY6_MOUSE|A2ANY6_S4827	Early-Uninfected	-0.0346251	0.284867	19.4428	0.904504	0.92882	0.0435894	0.0346251	0.0320685
A2ANY6_MOUSE|A2ANY6_S4827	Late-Uninfected	0.0108332	0.284867	19.4428	0.970052	0.979297	0.0132049	0.0108332	0.0090855
A2ANY6_MOUSE|A2ANY6_T4203	KO_Early-WT_Early	-0.412238	0.188538	8.44283	0.0585101	0.182832	1.23277	0.412238	0.737947
A2ANY6_MOUSE|A2ANY6_T4203	KO_Late-WT_Late	-0.141412	0.188538	8.44283	0.47361	0.655324	0.324579	0.141412	0.183544
A2ANY6_MOUSE|A2ANY6_T4203	KO_Uninfected-WT_Uninfected	-0.417238	0.230911	8.44283	0.106439	0.322179	0.9729	0.417238	0.491902
A2ANY6_MOUSE|A2ANY6_T4203	KO_Early-KO_Uninfected	-0.600368	0.188538	8.44283	0.0120464	0.0351408	1.91914	0.600368	1.45419
A2ANY6_MOUSE|A2ANY6_T4203	KO_Late-KO_Uninfected	-0.595155	0.188538	8.44283	0.0125747	0.0423162	1.9005	0.595155	1.37349
A2ANY6_MOUSE|A2ANY6_T4203	WT_Early-Wt_Uninfected	-0.605368	0.230911	8.44283	0.0292236	0.0688016	1.53427	0.605368	1.1624
A2ANY6_MOUSE|A2ANY6_T4203	WT_Late-Wt_Uninfected	-0.870981	0.230911	8.44283	0.00494177	0.0192434	2.30612	0.870981	1.71572
A2ANY6_MOUSE|A2ANY6_T4203	Infected-Uninfected	-0.667968	0.133317	8.44283	0.000883772	0.00286496	3.05366	0.667968	2.54288
A2ANY6_MOUSE|A2ANY6_T4203	KO-WT	-0.323629	0.117574	8.44283	0.0237325	0.0635481	1.62466	0.323629	1.1969
A2ANY6_MOUSE|A2ANY6_T4203	Early-Uninfected	-0.602868	0.149053	8.44283	0.00331879	0.00908764	2.47902	0.602868	2.04155
A2ANY6_MOUSE|A2ANY6_T4203	Late-Uninfected	-0.733068	0.149053	8.44283	0.000996904	0.00388091	3.00135	0.733068	2.41107
A2ARL5_MOUSE|A2ARL5_S70	KO_Early-WT_Early	0.348011	0.178721	19.4428	0.0660975	0.197377	1.17981	0.348011	0.704704
A2ARL5_MOUSE|A2ARL5_S70	KO_Late-WT_Late	0.478369	0.178721	19.4428	0.0147294	0.0738578	1.83182	0.478369	1.1316
A2ARL5_MOUSE|A2ARL5_S70	KO_Uninfected-WT_Uninfected	0.162047	0.206369	19.4428	0.441784	0.684513	0.35479	0.162047	0.164619
A2ARL5_MOUSE|A2ARL5_S70	KO_Early-KO_Uninfected	-0.277262	0.193041	19.4428	0.166816	0.278068	0.777762	0.277262	0.555849
A2ARL5_MOUSE|A2ARL5_S70	KO_Late-KO_Uninfected	-0.327126	0.193041	19.4428	0.10611	0.210848	0.974244	0.327126	0.67603
A2ARL5_MOUSE|A2ARL5_S70	WT_Early-Wt_Uninfected	-0.463226	0.193041	19.4428	0.026572	0.0640175	1.57558	0.463226	1.1937
A2ARL5_MOUSE|A2ARL5_S70	WT_Late-Wt_Uninfected	-0.643449	0.193041	19.4428	0.00341098	0.0144912	2.46712	0.643449	1.8389
A2ARL5_MOUSE|A2ARL5_S70	Infected-Uninfected	-0.427766	0.120995	19.4428	0.00214924	0.0060778	2.66772	0.427766	2.21625
A2ARL5_MOUSE|A2ARL5_S70	KO-WT	0.329476	0.108766	19.4428	0.00677425	0.0251323	2.16914	0.329476	1.59977
A2ARL5_MOUSE|A2ARL5_S70	Early-Uninfected	-0.370244	0.1365	19.4428	0.0136291	0.0299514	1.86553	0.370244	1.52358
A2ARL5_MOUSE|A2ARL5_S70	Late-Uninfected	-0.485288	0.1365	19.4428	0.00205384	0.00695862	2.68743	0.485288	2.15748
A2AT02_MOUSE|A2AT02_S140	KO_Early-WT_Early	0.638018	0.551465	8.44283	0.278976	0.479487	0.554433	0.638018	0.319223
A2AT02_MOUSE|A2AT02_S140	KO_Late-WT_Late	-0.0907383	0.551465	8.44283	0.873177	0.92909	0.0588976	0.0907383	0.0319423
A2AT02_MOUSE|A2AT02_S140	KO_Uninfected-WT_Uninfected	-0.245998	0.675404	8.44283	0.724644	0.868271	0.139875	0.245998	0.0613447
A2AT02_MOUSE|A2AT02_S140	KO_Early-KO_Uninfected	-0.119679	0.551465	8.44283	0.833346	0.891043	0.0791745	0.119679	0.0501015
A2AT02_MOUSE|A2AT02_S140	KO_Late-KO_Uninfected	-0.775699	0.551465	8.44283	0.195266	0.330723	0.709372	0.775699	0.480535
A2AT02_MOUSE|A2AT02_S140	WT_Early-Wt_Uninfected	-1.0037	0.675404	8.44283	0.173617	0.275657	0.760407	1.0037	0.55963
A2AT02_MOUSE|A2AT02_S140	WT_Late-Wt_Uninfected	-0.930959	0.675404	8.44283	0.203509	0.319258	0.691415	0.930959	0.495859
A2AT02_MOUSE|A2AT02_S140	Infected-Uninfected	-0.707508	0.389944	8.44283	0.105211	0.161382	0.977939	0.707508	0.792145
[truncated: 291,888+ more rows]
