# Supplementary material for: Multiplexed proteomics of autophagy-deficient murine macrophages reveals enhanced antimicrobial immunity via the oxidative stress response
Source: eLife. 2021 Jun 4;10:e62320. doi: 10.7554/eLife.62320 (PMC8177894; doi:10.7554/eLife.62320)
Supplement: Supplementary file 10. [file elife-62320-supp10.xlsx]

## Sheet: v1_8_0_Shigella_KGG_MSstatsTMT_
Protein	Label	log2FC	SE	DF	pvalue	adj.pvalue	log10p	abslog2FC	log10adjp
1433B_MOUSE|Q9CQV8_K11	KO_Early-WT_Early	-0.0769605	0.151729	19.3593	0.617727	0.752915	0.209203	0.0769605	0.123254
1433B_MOUSE|Q9CQV8_K11	KO_Late-WT_Late	-0.106263	0.151729	19.3593	0.49204	0.684973	0.308	0.106263	0.164326
1433B_MOUSE|Q9CQV8_K11	KO_Uninfected-WT_Uninfected	0.0479065	0.175201	19.3593	0.787413	0.887742	0.103797	0.0479065	0.0517132
1433B_MOUSE|Q9CQV8_K11	KO_Early-KO_Uninfected	-0.0592154	0.163886	19.3593	0.721773	0.917636	0.1416	0.0592154	0.0373297
1433B_MOUSE|Q9CQV8_K11	KO_Late-KO_Uninfected	-0.191171	0.163886	19.3593	0.257586	0.594191	0.589078	0.191171	0.226074
1433B_MOUSE|Q9CQV8_K11	WT_Early-Wt_Uninfected	0.0656515	0.163886	19.3593	0.693106	0.868825	0.1592	0.0656515	0.0610678
1433B_MOUSE|Q9CQV8_K11	WT_Late-Wt_Uninfected	-0.0370011	0.163886	19.3593	0.823744	0.926138	0.0842079	0.0370011	0.0333244
1433B_MOUSE|Q9CQV8_K11	Infected-Uninfected	-0.055434	0.102721	19.3593	0.595587	0.776213	0.225055	0.055434	0.110019
1433B_MOUSE|Q9CQV8_K11	KO-WT	-0.0451058	0.0923392	19.3593	0.630698	0.72212	0.200179	0.0451058	0.141391
1433B_MOUSE|Q9CQV8_K11	Early-Uninfected	0.00321804	0.115885	19.3593	0.97813	0.992685	0.00960325	0.00321804	0.00318834
1433B_MOUSE|Q9CQV8_K11	Late-Uninfected	-0.114086	0.115885	19.3593	0.337025	0.557639	0.472338	0.114086	0.253647
1433B_MOUSE|Q9CQV8_K122	KO_Early-WT_Early	-0.380494	0.222434	8.35931	0.1239	0.267487	0.906928	0.380494	0.572697
1433B_MOUSE|Q9CQV8_K122	KO_Late-WT_Late	-0.0294706	0.222434	8.35931	0.897729	0.948168	0.0468545	0.0294706	0.0231149
1433B_MOUSE|Q9CQV8_K122	KO_Uninfected-WT_Uninfected	0.281366	0.272425	8.35931	0.330642	0.538642	0.480642	0.281366	0.2687
1433B_MOUSE|Q9CQV8_K122	KO_Early-KO_Uninfected	-0.423224	0.222434	8.35931	0.0920023	0.430903	1.0362	0.423224	0.365621
1433B_MOUSE|Q9CQV8_K122	KO_Late-KO_Uninfected	-0.15413	0.222434	8.35931	0.50715	0.782761	0.294864	0.15413	0.106371
1433B_MOUSE|Q9CQV8_K122	WT_Early-Wt_Uninfected	0.238636	0.272425	8.35931	0.405514	0.681407	0.391994	0.238636	0.166593
1433B_MOUSE|Q9CQV8_K122	WT_Late-Wt_Uninfected	0.156707	0.272425	8.35931	0.580286	0.792433	0.236358	0.156707	0.101038
1433B_MOUSE|Q9CQV8_K122	Infected-Uninfected	-0.0455025	0.157285	8.35931	0.779397	0.886581	0.108241	0.0455025	0.0522817
1433B_MOUSE|Q9CQV8_K122	KO-WT	-0.0428661	0.138712	8.35931	0.764862	0.829816	0.116417	0.0428661	0.0810183
1433B_MOUSE|Q9CQV8_K122	Early-Uninfected	-0.0922937	0.17585	8.35931	0.613323	0.824561	0.212311	0.0922937	0.0837775
1433B_MOUSE|Q9CQV8_K122	Late-Uninfected	0.00128867	0.17585	8.35931	0.994325	0.997712	0.0024717	0.00128867	0.000994936
1433B_MOUSE|Q9CQV8_K160	KO_Early-WT_Early	-0.545943	0.113833	19.3593	0.00011964	0.00331716	3.92213	0.545943	2.47923
1433B_MOUSE|Q9CQV8_K160	KO_Late-WT_Late	-0.500469	0.113833	19.3593	0.000298128	0.00854068	3.5256	0.500469	2.06851
1433B_MOUSE|Q9CQV8_K160	KO_Uninfected-WT_Uninfected	0.0443231	0.131443	19.3593	0.739591	0.85677	0.131008	0.0443231	0.0671358
1433B_MOUSE|Q9CQV8_K160	KO_Early-KO_Uninfected	-0.118792	0.122954	19.3593	0.345883	0.726924	0.46107	0.118792	0.138511
1433B_MOUSE|Q9CQV8_K160	KO_Late-KO_Uninfected	-0.119178	0.122954	19.3593	0.344355	0.669471	0.462993	0.119178	0.174268
1433B_MOUSE|Q9CQV8_K160	WT_Early-Wt_Uninfected	0.471474	0.122954	19.3593	0.00108691	0.023458	2.96381	0.471474	1.62971
1433B_MOUSE|Q9CQV8_K160	WT_Late-Wt_Uninfected	0.425614	0.122954	19.3593	0.00255765	0.033411	2.59216	0.425614	1.47611
1433B_MOUSE|Q9CQV8_K160	Infected-Uninfected	0.16478	0.0770652	19.3593	0.0454576	0.171062	1.34239	0.16478	0.766846
1433B_MOUSE|Q9CQV8_K160	KO-WT	-0.334029	0.0692765	19.3593	0.000112858	0.00108428	3.94747	0.334029	2.96486
1433B_MOUSE|Q9CQV8_K160	Early-Uninfected	0.176341	0.0869413	19.3593	0.0565169	0.238746	1.24782	0.176341	0.622063
1433B_MOUSE|Q9CQV8_K160	Late-Uninfected	0.153218	0.0869413	19.3593	0.0937979	0.26352	1.02781	0.153218	0.579186
1433B_MOUSE|Q9CQV8_K51	KO_Early-WT_Early	-0.0566021	0.218579	19.3593	0.798403	0.877626	0.0977776	0.0566021	0.0566906
1433B_MOUSE|Q9CQV8_K51	KO_Late-WT_Late	0.0962149	0.218579	19.3593	0.664679	0.811963	0.177388	0.0962149	0.0904639
1433B_MOUSE|Q9CQV8_K51	KO_Uninfected-WT_Uninfected	0.769704	0.252393	19.3593	0.00649449	0.0579396	2.18746	0.769704	1.23702
1433B_MOUSE|Q9CQV8_K51	KO_Early-KO_Uninfected	-0.315085	0.236092	19.3593	0.197498	0.591707	0.704436	0.315085	0.227894
1433B_MOUSE|Q9CQV8_K51	KO_Late-KO_Uninfected	-0.298729	0.236092	19.3593	0.22078	0.556299	0.656041	0.298729	0.254692
1433B_MOUSE|Q9CQV8_K51	WT_Early-Wt_Uninfected	0.511221	0.236092	19.3593	0.043046	0.218	1.36607	0.511221	0.661543
1433B_MOUSE|Q9CQV8_K51	WT_Late-Wt_Uninfected	0.37476	0.236092	19.3593	0.128633	0.361155	0.890646	0.37476	0.442306
1433B_MOUSE|Q9CQV8_K51	Infected-Uninfected	0.0680419	0.147979	19.3593	0.650775	0.812249	0.186569	0.0680419	0.0903106
1433B_MOUSE|Q9CQV8_K51	KO-WT	0.269772	0.133023	19.3593	0.0565462	0.109795	1.2476	0.269772	0.959417
1433B_MOUSE|Q9CQV8_K51	Early-Uninfected	0.0980684	0.166942	19.3593	0.563699	0.794418	0.248953	0.0980684	0.0999508
1433B_MOUSE|Q9CQV8_K51	Late-Uninfected	0.0380154	0.166942	19.3593	0.822255	0.908861	0.0849935	0.0380154	0.0415026
1433B_MOUSE|Q9CQV8_K70	KO_Early-WT_Early	-0.267629	0.201702	8.35931	0.219656	0.389075	0.658258	0.267629	0.409967
1433B_MOUSE|Q9CQV8_K70	KO_Late-WT_Late	-0.108446	0.201702	8.35931	0.60483	0.771167	0.218367	0.108446	0.112852
1433B_MOUSE|Q9CQV8_K70	KO_Uninfected-WT_Uninfected	-0.595422	0.247033	8.35931	0.0412219	0.163687	1.38487	0.595422	0.785985
1433B_MOUSE|Q9CQV8_K70	KO_Early-KO_Uninfected	0.0486938	0.201702	8.35931	0.815051	0.945533	0.0888154	0.0486938	0.0243234
1433B_MOUSE|Q9CQV8_K70	KO_Late-KO_Uninfected	-0.227376	0.201702	8.35931	0.290937	0.625008	0.536201	0.227376	0.204114
1433B_MOUSE|Q9CQV8_K70	WT_Early-Wt_Uninfected	-0.279099	0.247033	8.35931	0.289934	0.575841	0.537701	0.279099	0.239698
1433B_MOUSE|Q9CQV8_K70	WT_Late-Wt_Uninfected	-0.714351	0.247033	8.35931	0.0192397	0.120768	1.7158	0.714351	0.918048
1433B_MOUSE|Q9CQV8_K70	Infected-Uninfected	-0.293033	0.142625	8.35931	0.0724753	0.224513	1.13981	0.293033	0.648758
1433B_MOUSE|Q9CQV8_K70	KO-WT	-0.323832	0.125783	8.35931	0.0317527	0.0701411	1.49822	0.323832	1.15403
1433B_MOUSE|Q9CQV8_K70	Early-Uninfected	-0.115203	0.159459	8.35931	0.489729	0.741516	0.310044	0.115203	0.12988
1433B_MOUSE|Q9CQV8_K70	Late-Uninfected	-0.470864	0.159459	8.35931	0.0174816	0.0893911	1.75742	0.470864	1.04871
1433E_MOUSE|P62259_K123	KO_Early-WT_Early	-0.481357	0.307718	19.3593	0.133952	0.28112	0.873052	0.481357	0.551109
1433E_MOUSE|P62259_K123	KO_Late-WT_Late	-0.116992	0.307718	19.3593	0.707942	0.839845	0.150002	0.116992	0.0758008
1433E_MOUSE|P62259_K123	KO_Uninfected-WT_Uninfected	0.0804427	0.355322	19.3593	0.823268	0.908504	0.0844586	0.0804427	0.0416733
1433E_MOUSE|P62259_K123	KO_Early-KO_Uninfected	0.391594	0.332373	19.3593	0.253007	0.650416	0.596868	0.391594	0.186809
1433E_MOUSE|P62259_K123	KO_Late-KO_Uninfected	0.535608	0.332373	19.3593	0.123262	0.418093	0.909171	0.535608	0.378727
1433E_MOUSE|P62259_K123	WT_Early-Wt_Uninfected	0.953393	0.332373	19.3593	0.00971095	0.0952474	2.01274	0.953393	1.02115
1433E_MOUSE|P62259_K123	WT_Late-Wt_Uninfected	0.733043	0.332373	19.3593	0.0396955	0.18776	1.40126	0.733043	0.726397
1433E_MOUSE|P62259_K123	Infected-Uninfected	0.653409	0.208326	19.3593	0.00534529	0.0416233	2.27203	0.653409	1.38066
1433E_MOUSE|P62259_K123	KO-WT	-0.172635	0.187271	19.3593	0.367955	0.479546	0.434206	0.172635	0.31917
1433E_MOUSE|P62259_K123	Early-Uninfected	0.672493	0.235023	19.3593	0.00986302	0.0821731	2.00599	0.672493	1.08527
1433E_MOUSE|P62259_K123	Late-Uninfected	0.634326	0.235023	19.3593	0.0140668	0.0772579	1.8518	0.634326	1.11206
1433E_MOUSE|P62259_K125	KO_Early-WT_Early	-0.241483	0.32947	19.3593	0.472375	0.635235	0.325713	0.241483	0.197065
1433E_MOUSE|P62259_K125	KO_Late-WT_Late	-0.150079	0.32947	19.3593	0.653804	0.80602	0.184552	0.150079	0.093654
1433E_MOUSE|P62259_K125	KO_Uninfected-WT_Uninfected	1.27091	0.380439	19.3593	0.00336904	0.0400142	2.47249	1.27091	1.39779
1433E_MOUSE|P62259_K125	KO_Early-KO_Uninfected	-0.340378	0.355868	19.3593	0.350626	0.729568	0.455155	0.340378	0.136934
1433E_MOUSE|P62259_K125	KO_Late-KO_Uninfected	-0.269679	0.355868	19.3593	0.457693	0.749586	0.339426	0.269679	0.125178
1433E_MOUSE|P62259_K125	WT_Early-Wt_Uninfected	1.17201	0.355868	19.3593	0.00375044	0.0516018	2.42592	1.17201	1.28734
1433E_MOUSE|P62259_K125	WT_Late-Wt_Uninfected	1.15131	0.355868	19.3593	0.00427853	0.0468052	2.36871	1.15131	1.32971
1433E_MOUSE|P62259_K125	Infected-Uninfected	0.428315	0.223052	19.3593	0.0696823	0.218567	1.15688	0.428315	0.660415
1433E_MOUSE|P62259_K125	KO-WT	0.293114	0.200509	19.3593	0.159825	0.248417	0.796355	0.293114	0.604818
1433E_MOUSE|P62259_K125	Early-Uninfected	0.415816	0.251637	19.3593	0.11457	0.356173	0.940929	0.415816	0.448338
1433E_MOUSE|P62259_K125	Late-Uninfected	0.440814	0.251637	19.3593	0.0956375	0.266784	1.01937	0.440814	0.573841
1433E_MOUSE|P62259_K142	KO_Early-WT_Early	0.192266	0.23483	19.3593	0.422895	0.59203	0.373767	0.192266	0.227657
1433E_MOUSE|P62259_K142	KO_Late-WT_Late	0.0390191	0.23483	19.3593	0.869755	0.933627	0.0606032	0.0390191	0.0298267
1433E_MOUSE|P62259_K142	KO_Uninfected-WT_Uninfected	-0.20289	0.271158	19.3593	0.463311	0.653198	0.334127	0.20289	0.184955
1433E_MOUSE|P62259_K142	KO_Early-KO_Uninfected	0.170733	0.253645	19.3593	0.508828	0.826029	0.293429	0.170733	0.0830049
1433E_MOUSE|P62259_K142	KO_Late-KO_Uninfected	0.0110191	0.253645	19.3593	0.965793	0.991495	0.0151158	0.0110191	0.00370965
1433E_MOUSE|P62259_K142	WT_Early-Wt_Uninfected	-0.224423	0.253645	19.3593	0.387126	0.666853	0.412148	0.224423	0.17597
1433E_MOUSE|P62259_K142	WT_Late-Wt_Uninfected	-0.23089	0.253645	19.3593	0.373865	0.636865	0.427285	0.23089	0.195952
1433E_MOUSE|P62259_K142	Infected-Uninfected	-0.0683903	0.15898	19.3593	0.671815	0.824143	0.17275	0.0683903	0.0839973
1433E_MOUSE|P62259_K142	KO-WT	0.00946496	0.142913	19.3593	0.947875	0.966645	0.0232491	0.00946496	0.0147331
1433E_MOUSE|P62259_K142	Early-Uninfected	-0.0268451	0.179354	19.3593	0.882568	0.955038	0.0542517	0.0268451	0.0199795
1433E_MOUSE|P62259_K142	Late-Uninfected	-0.109936	0.179354	19.3593	0.547042	0.733896	0.26198	0.109936	0.134366
1433E_MOUSE|P62259_K78	KO_Early-WT_Early	0.328414	0.406401	8.35931	0.44142	0.609236	0.355148	0.328414	0.215214
1433E_MOUSE|P62259_K78	KO_Late-WT_Late	0.128307	0.406401	8.35931	0.759958	0.872569	0.119211	0.128307	0.0592002
1433E_MOUSE|P62259_K78	KO_Uninfected-WT_Uninfected	-0.467324	0.497738	8.35931	0.374118	0.577869	0.426991	0.467324	0.238171
1433E_MOUSE|P62259_K78	KO_Early-KO_Uninfected	0.110569	0.406401	8.35931	0.792168	0.940689	0.101183	0.110569	0.026554
1433E_MOUSE|P62259_K78	KO_Late-KO_Uninfected	0.0784309	0.406401	8.35931	0.851575	0.95065	0.0697773	0.0784309	0.0219794
1433E_MOUSE|P62259_K78	WT_Early-Wt_Uninfected	-0.685168	0.497738	8.35931	0.20439	0.485952	0.68954	0.685168	0.313407
1433E_MOUSE|P62259_K78	WT_Late-Wt_Uninfected	-0.5172	0.497738	8.35931	0.327878	0.592671	0.484288	0.5172	0.227186
1433E_MOUSE|P62259_K78	Infected-Uninfected	-0.253342	0.287369	8.35931	0.402635	0.624674	0.395089	0.253342	0.204347
1433E_MOUSE|P62259_K78	KO-WT	-0.00353417	0.253436	8.35931	0.989201	0.992858	0.00471548	0.00353417	0.00311275
1433E_MOUSE|P62259_K78	Early-Uninfected	-0.287299	0.321288	8.35931	0.396225	0.672156	0.402058	0.287299	0.17253
1433E_MOUSE|P62259_K78	Late-Uninfected	-0.219384	0.321288	8.35931	0.513192	0.710072	0.28972	0.219384	0.148698
1433F_MOUSE|P68510_K110	KO_Early-WT_Early	-0.613116	0.176469	19.3593	0.00248412	0.022478	2.60483	0.613116	1.64824
1433F_MOUSE|P68510_K110	KO_Late-WT_Late	-0.462551	0.176469	19.3593	0.0166415	0.0867581	1.77881	0.462551	1.06169
1433F_MOUSE|P68510_K110	KO_Uninfected-WT_Uninfected	-0.254673	0.203769	19.3593	0.226266	0.430921	0.64538	0.254673	0.365602
1433F_MOUSE|P68510_K110	KO_Early-KO_Uninfected	-0.0835494	0.190608	19.3593	0.665999	0.895086	0.176527	0.0835494	0.0481351
1433F_MOUSE|P68510_K110	KO_Late-KO_Uninfected	-0.191092	0.190608	19.3593	0.328452	0.655495	0.483528	0.191092	0.183431
1433F_MOUSE|P68510_K110	WT_Early-Wt_Uninfected	0.274894	0.190608	19.3593	0.165232	0.4361	0.781906	0.274894	0.360414
1433F_MOUSE|P68510_K110	WT_Late-Wt_Uninfected	0.0167866	0.190608	19.3593	0.930727	0.973448	0.0311777	0.0167866	0.0116873
1433F_MOUSE|P68510_K110	Infected-Uninfected	0.0042598	0.11947	19.3593	0.971922	0.987452	0.0123686	0.0042598	0.00548407
1433F_MOUSE|P68510_K110	KO-WT	-0.443447	0.107396	19.3593	0.000551509	0.0033946	3.25845	0.443447	2.46921
1433F_MOUSE|P68510_K110	Early-Uninfected	0.0956721	0.13478	19.3593	0.486268	0.738132	0.313124	0.0956721	0.131866
1433F_MOUSE|P68510_K110	Late-Uninfected	-0.0871525	0.13478	19.3593	0.525467	0.718991	0.279455	0.0871525	0.143276
1433F_MOUSE|P68510_K127	KO_Early-WT_Early	0.0894965	0.1991	8.35931	0.664495	0.788538	0.177509	0.0894965	0.103177
1433F_MOUSE|P68510_K127	KO_Late-WT_Late	0.219217	0.1991	8.35931	0.301571	0.509271	0.520611	0.219217	0.293051
1433F_MOUSE|P68510_K127	KO_Uninfected-WT_Uninfected	0.613913	0.243847	8.35931	0.0347561	0.150416	1.45897	0.613913	0.822706
1433F_MOUSE|P68510_K127	KO_Early-KO_Uninfected	0.103525	0.1991	8.35931	0.616574	0.876451	0.210014	0.103525	0.0572724
1433F_MOUSE|P68510_K127	KO_Late-KO_Uninfected	0.0864433	0.1991	8.35931	0.675154	0.877615	0.170597	0.0864433	0.0566961
1433F_MOUSE|P68510_K127	WT_Early-Wt_Uninfected	0.627941	0.243847	8.35931	0.0317215	0.183651	1.49865	0.627941	0.736007
1433F_MOUSE|P68510_K127	WT_Late-Wt_Uninfected	0.481139	0.243847	8.35931	0.0823907	0.28277	1.08412	0.481139	0.548566
1433F_MOUSE|P68510_K127	Infected-Uninfected	0.324762	0.140785	8.35931	0.0485953	0.178459	1.31341	0.324762	0.748461
1433F_MOUSE|P68510_K127	KO-WT	0.307542	0.124161	8.35931	0.0370754	0.0790984	1.43091	0.307542	1.10183
1433F_MOUSE|P68510_K127	Early-Uninfected	0.365733	0.157402	8.35931	0.0473178	0.21612	1.32498	0.365733	0.665306
1433F_MOUSE|P68510_K127	Late-Uninfected	0.283791	0.157402	8.35931	0.10745	0.287131	0.968795	0.283791	0.54192
1433F_MOUSE|P68510_K142	KO_Early-WT_Early	-0.567134	0.22549	19.3593	0.0208718	0.0845502	1.68044	0.567134	1.07289
1433F_MOUSE|P68510_K142	KO_Late-WT_Late	-0.467131	0.22549	19.3593	0.0518935	0.17449	1.28489	0.467131	0.758229
1433F_MOUSE|P68510_K142	KO_Uninfected-WT_Uninfected	-0.670371	0.260373	19.3593	0.0183858	0.105132	1.73552	0.670371	0.978264
1433F_MOUSE|P68510_K142	KO_Early-KO_Uninfected	-0.249671	0.243557	19.3593	0.317954	0.706636	0.497636	0.249671	0.150804
1433F_MOUSE|P68510_K142	KO_Late-KO_Uninfected	-0.240132	0.243557	19.3593	0.336326	0.662635	0.47324	0.240132	0.178726
1433F_MOUSE|P68510_K142	WT_Early-Wt_Uninfected	-0.352908	0.243557	19.3593	0.163349	0.433914	0.786883	0.352908	0.362597
1433F_MOUSE|P68510_K142	WT_Late-Wt_Uninfected	-0.443372	0.243557	19.3593	0.0841931	0.285793	1.07472	0.443372	0.543949
1433F_MOUSE|P68510_K142	Infected-Uninfected	-0.321521	0.152657	19.3593	0.048458	0.178289	1.31463	0.321521	0.748875
1433F_MOUSE|P68510_K142	KO-WT	-0.568212	0.137229	19.3593	0.00053706	0.00332036	3.26998	0.568212	2.47881
1433F_MOUSE|P68510_K142	Early-Uninfected	-0.301289	0.17222	19.3593	0.0960516	0.323084	1.0175	0.301289	0.490685
1433F_MOUSE|P68510_K142	Late-Uninfected	-0.341752	0.17222	19.3593	0.0615709	0.20119	1.21062	0.341752	0.696393
1433F_MOUSE|P68510_K77	KO_Early-WT_Early	-0.0838591	0.340295	19.3593	0.807943	0.883543	0.0926192	0.0838591	0.0537724
1433F_MOUSE|P68510_K77	KO_Late-WT_Late	-0.47795	0.340295	19.3593	0.176007	0.363745	0.754471	0.47795	0.439203
1433F_MOUSE|P68510_K77	KO_Uninfected-WT_Uninfected	-0.453598	0.392939	19.3593	0.262399	0.469409	0.581038	0.453598	0.328448
1433F_MOUSE|P68510_K77	KO_Early-KO_Uninfected	-0.217025	0.367561	19.3593	0.561722	0.850985	0.250479	0.217025	0.0700782
1433F_MOUSE|P68510_K77	KO_Late-KO_Uninfected	-0.623105	0.367561	19.3593	0.106054	0.385951	0.974473	0.623105	0.413468
1433F_MOUSE|P68510_K77	WT_Early-Wt_Uninfected	-0.586764	0.367561	19.3593	0.126601	0.378803	0.897563	0.586764	0.421587
1433F_MOUSE|P68510_K77	WT_Late-Wt_Uninfected	-0.598753	0.367561	19.3593	0.11948	0.3485	0.922706	0.598753	0.457798
1433F_MOUSE|P68510_K77	Infected-Uninfected	-0.506412	0.230381	19.3593	0.0402892	0.159289	1.39481	0.506412	0.797815
1433F_MOUSE|P68510_K77	KO-WT	-0.338469	0.207097	19.3593	0.118342	0.196508	0.926859	0.338469	0.706621
1433F_MOUSE|P68510_K77	Early-Uninfected	-0.401894	0.259905	19.3593	0.13822	0.396448	0.859429	0.401894	0.401814
1433F_MOUSE|P68510_K77	Late-Uninfected	-0.610929	0.259905	19.3593	0.0294797	0.127488	1.53048	0.610929	0.894531
1433F_MOUSE|P68510_K78	KO_Early-WT_Early	-0.0902333	0.397759	19.3593	0.822915	0.892815	0.0846448	0.0902333	0.0492384
1433F_MOUSE|P68510_K78	KO_Late-WT_Late	-0.576307	0.397759	19.3593	0.163375	0.347681	0.786815	0.576307	0.458819
1433F_MOUSE|P68510_K78	KO_Uninfected-WT_Uninfected	-0.225879	0.459293	19.3593	0.628393	0.78021	0.201769	0.225879	0.107789
1433F_MOUSE|P68510_K78	KO_Early-KO_Uninfected	-0.337881	0.429629	19.3593	0.441126	0.791211	0.355437	0.337881	0.101708
1433F_MOUSE|P68510_K78	KO_Late-KO_Uninfected	-0.689206	0.429629	19.3593	0.124862	0.420603	0.903569	0.689206	0.376128
1433F_MOUSE|P68510_K78	WT_Early-Wt_Uninfected	-0.473526	0.429629	19.3593	0.2839	0.570364	0.546835	0.473526	0.243848
1433F_MOUSE|P68510_K78	WT_Late-Wt_Uninfected	-0.338778	0.429629	19.3593	0.439934	0.691392	0.356613	0.338778	0.160276
1433F_MOUSE|P68510_K78	Infected-Uninfected	-0.459848	0.269284	19.3593	0.103685	0.281799	0.984282	0.459848	0.550061
1433F_MOUSE|P68510_K78	KO-WT	-0.297473	0.242068	19.3593	0.233846	0.335355	0.631071	0.297473	0.474495
1433F_MOUSE|P68510_K78	Early-Uninfected	-0.405704	0.303793	19.3593	0.197217	0.477116	0.705056	0.405704	0.321376
1433F_MOUSE|P68510_K78	Late-Uninfected	-0.513992	0.303793	19.3593	0.106697	0.285941	0.971848	0.513992	0.543723
1433G_MOUSE|P61982_K142	KO_Early-WT_Early	-0.490405	0.200326	19.3593	0.0240506	0.0927833	1.61887	0.490405	1.03253
1433G_MOUSE|P61982_K142	KO_Late-WT_Late	-0.575472	0.200326	19.3593	0.0096208	0.0657625	2.01679	0.575472	1.18202
1433G_MOUSE|P61982_K142	KO_Uninfected-WT_Uninfected	-0.258082	0.231317	19.3593	0.278205	0.48732	0.555635	0.258082	0.312186
1433G_MOUSE|P61982_K142	KO_Early-KO_Uninfected	-0.19916	0.216377	19.3593	0.368676	0.740872	0.433355	0.19916	0.130257
1433G_MOUSE|P61982_K142	KO_Late-KO_Uninfected	-0.371936	0.216377	19.3593	0.101579	0.378975	0.993198	0.371936	0.421389
1433G_MOUSE|P61982_K142	WT_Early-Wt_Uninfected	0.0331625	0.216377	19.3593	0.879777	0.954213	0.0556272	0.0331625	0.0203547
1433G_MOUSE|P61982_K142	WT_Late-Wt_Uninfected	-0.0545462	0.216377	19.3593	0.803629	0.917626	0.0949442	0.0545462	0.0373341
1433G_MOUSE|P61982_K142	Infected-Uninfected	-0.14812	0.135622	19.3593	0.28817	0.516178	0.540351	0.14812	0.2872
1433G_MOUSE|P61982_K142	KO-WT	-0.44132	0.121915	19.3593	0.0017802	0.00792544	2.74953	0.44132	2.10098
1433G_MOUSE|P61982_K142	Early-Uninfected	-0.0829987	0.153002	19.3593	0.593686	0.811165	0.226443	0.0829987	0.0908908
1433G_MOUSE|P61982_K142	Late-Uninfected	-0.213241	0.153002	19.3593	0.179198	0.388352	0.746668	0.213241	0.410775
1433G_MOUSE|P61982_K152	KO_Early-WT_Early	-0.526362	0.206659	8.35931	0.0331708	0.114872	1.47924	0.526362	0.939786
1433G_MOUSE|P61982_K152	KO_Late-WT_Late	-0.162055	0.206659	8.35931	0.454587	0.654228	0.342383	0.162055	0.184271
1433G_MOUSE|P61982_K152	KO_Uninfected-WT_Uninfected	-0.0840345	0.253105	8.35931	0.74805	0.861399	0.126069	0.0840345	0.0647956
1433G_MOUSE|P61982_K152	KO_Early-KO_Uninfected	-0.117932	0.206659	8.35931	0.583242	0.857902	0.234151	0.117932	0.0665624
1433G_MOUSE|P61982_K152	KO_Late-KO_Uninfected	-0.0686669	0.206659	8.35931	0.747864	0.91242	0.126178	0.0686669	0.039805
1433G_MOUSE|P61982_K152	WT_Early-Wt_Uninfected	0.324396	0.253105	8.35931	0.234364	0.520171	0.630108	0.324396	0.283853
1433G_MOUSE|P61982_K152	WT_Late-Wt_Uninfected	0.00935399	0.253105	8.35931	0.971387	0.98962	0.0126079	0.00935399	0.00453172
1433G_MOUSE|P61982_K152	Infected-Uninfected	0.0367878	0.14613	8.35931	0.807316	0.902032	0.0929566	0.0367878	0.0447782
1433G_MOUSE|P61982_K152	KO-WT	-0.257484	0.128875	8.35931	0.0792382	0.143575	1.10107	0.257484	0.842923
1433G_MOUSE|P61982_K152	Early-Uninfected	0.103232	0.163378	8.35931	0.544369	0.782922	0.264107	0.103232	0.106282
1433G_MOUSE|P61982_K152	Late-Uninfected	-0.0296564	0.163378	8.35931	0.860284	0.92833	0.0653582	0.0296564	0.0322976
1433G_MOUSE|P61982_K77	KO_Early-WT_Early	0.331008	0.257036	19.3593	0.213002	0.38145	0.671616	0.331008	0.418562
1433G_MOUSE|P61982_K77	KO_Late-WT_Late	0.263027	0.257036	19.3593	0.318781	0.528821	0.496508	0.263027	0.276692
1433G_MOUSE|P61982_K77	KO_Uninfected-WT_Uninfected	0.487432	0.2968	19.3593	0.116674	0.295118	0.933026	0.487432	0.530004
1433G_MOUSE|P61982_K77	KO_Early-KO_Uninfected	-0.524586	0.277631	19.3593	0.0738949	0.389274	1.13139	0.524586	0.409745
1433G_MOUSE|P61982_K77	KO_Late-KO_Uninfected	-0.42556	0.277631	19.3593	0.141498	0.447319	0.849249	0.42556	0.349382
1433G_MOUSE|P61982_K77	WT_Early-Wt_Uninfected	-0.368161	0.277631	19.3593	0.200247	0.480551	0.698435	0.368161	0.318261
1433G_MOUSE|P61982_K77	WT_Late-Wt_Uninfected	-0.201154	0.277631	19.3593	0.477401	0.721477	0.321117	0.201154	0.141778
1433G_MOUSE|P61982_K77	Infected-Uninfected	-0.379865	0.174014	19.3593	0.0415455	0.161764	1.38148	0.379865	0.791118
1433G_MOUSE|P61982_K77	KO-WT	0.360489	0.156427	19.3593	0.0324248	0.0712566	1.48912	0.360489	1.14717
1433G_MOUSE|P61982_K77	Early-Uninfected	-0.446373	0.196315	19.3593	0.0345391	0.179424	1.46169	0.446373	0.746119
1433G_MOUSE|P61982_K77	Late-Uninfected	-0.313357	0.196315	19.3593	0.126639	0.31762	0.897431	0.313357	0.498092
1433T_MOUSE|P68254_K115	KO_Early-WT_Early	0.0547367	0.167948	8.35931	0.752499	0.849267	0.123494	0.0547367	0.0709555
1433T_MOUSE|P68254_K115	KO_Late-WT_Late	0.152943	0.167948	8.35931	0.38798	0.594869	0.411191	0.152943	0.225579
1433T_MOUSE|P68254_K115	KO_Uninfected-WT_Uninfected	0.388155	0.205693	8.35931	0.0942767	0.259515	1.0256	0.388155	0.585838
1433T_MOUSE|P68254_K115	KO_Early-KO_Uninfected	-0.228109	0.167948	8.35931	0.209917	0.603882	0.677953	0.228109	0.219048
1433T_MOUSE|P68254_K115	KO_Late-KO_Uninfected	-0.207976	0.167948	8.35931	0.249238	0.585319	0.603385	0.207976	0.232607
1433T_MOUSE|P68254_K115	WT_Early-Wt_Uninfected	0.105309	0.205693	8.35931	0.62192	0.828201	0.206266	0.105309	0.0818643
1433T_MOUSE|P68254_K115	WT_Late-Wt_Uninfected	0.0272355	0.205693	8.35931	0.897793	0.95953	0.0468236	0.0272355	0.0179414
1433T_MOUSE|P68254_K115	Infected-Uninfected	-0.075885	0.118757	8.35931	0.539938	0.736816	0.267656	0.075885	0.132641
1433T_MOUSE|P68254_K115	KO-WT	0.198612	0.104734	8.35931	0.0929191	0.162744	1.03189	0.198612	0.788496
1433T_MOUSE|P68254_K115	Early-Uninfected	-0.0613998	0.132774	8.35931	0.655567	0.847593	0.183383	0.0613998	0.0718127
1433T_MOUSE|P68254_K115	Late-Uninfected	-0.0903701	0.132774	8.35931	0.514514	0.711318	0.288603	0.0903701	0.147936
1433T_MOUSE|P68254_K120	KO_Early-WT_Early	-0.107541	0.397555	19.3593	0.789635	0.872153	0.102574	0.107541	0.0594074
1433T_MOUSE|P68254_K120	KO_Late-WT_Late	-0.065083	0.397555	19.3593	0.871658	0.934483	0.0596539	0.065083	0.0294287
1433T_MOUSE|P68254_K120	KO_Uninfected-WT_Uninfected	1.44705	0.459057	19.3593	0.00515924	0.0514267	2.28741	1.44705	1.28881
1433T_MOUSE|P68254_K120	KO_Early-KO_Uninfected	-0.40848	0.429409	19.3593	0.353198	0.731307	0.451981	0.40848	0.1359
1433T_MOUSE|P68254_K120	KO_Late-KO_Uninfected	-0.34382	0.429409	19.3593	0.433032	0.734628	0.36348	0.34382	0.133933
1433T_MOUSE|P68254_K120	WT_Early-Wt_Uninfected	1.14611	0.429409	19.3593	0.0150088	0.120742	1.82365	1.14611	0.918143
1433T_MOUSE|P68254_K120	WT_Late-Wt_Uninfected	1.16832	0.429409	19.3593	0.0134177	0.0969201	1.87232	1.16832	1.01359
1433T_MOUSE|P68254_K120	Infected-Uninfected	0.390532	0.269146	19.3593	0.16279	0.370231	0.788372	0.390532	0.431527
1433T_MOUSE|P68254_K120	KO-WT	0.42481	0.241944	19.3593	0.09493	0.165727	1.0226	0.42481	0.780608
1433T_MOUSE|P68254_K120	Early-Uninfected	0.368817	0.303638	19.3593	0.239104	0.523236	0.621414	0.368817	0.281302
1433T_MOUSE|P68254_K120	Late-Uninfected	0.412248	0.303638	19.3593	0.190177	0.400143	0.720843	0.412248	0.397785
1433T_MOUSE|P68254_K49	KO_Early-WT_Early	-0.362023	0.206454	19.3593	0.0953307	0.225041	1.02077	0.362023	0.647738
1433T_MOUSE|P68254_K49	KO_Late-WT_Late	-0.275135	0.206454	19.3593	0.198114	0.391799	0.703084	0.275135	0.406937
1433T_MOUSE|P68254_K49	KO_Uninfected-WT_Uninfected	0.388915	0.238392	19.3593	0.118966	0.29848	0.924577	0.388915	0.525084
1433T_MOUSE|P68254_K49	KO_Early-KO_Uninfected	-0.115855	0.222996	19.3593	0.609275	0.872135	0.215186	0.115855	0.0594163
1433T_MOUSE|P68254_K49	KO_Late-KO_Uninfected	-0.215491	0.222996	19.3593	0.345789	0.671004	0.461189	0.215491	0.173275
1433T_MOUSE|P68254_K49	WT_Early-Wt_Uninfected	0.635083	0.222996	19.3593	0.010159	0.0980437	1.99315	0.635083	1.00858
1433T_MOUSE|P68254_K49	WT_Late-Wt_Uninfected	0.448559	0.222996	19.3593	0.0584019	0.231234	1.23357	0.448559	0.635948
1433T_MOUSE|P68254_K49	Infected-Uninfected	0.188074	0.13977	19.3593	0.193982	0.40958	0.712239	0.188074	0.387661
1433T_MOUSE|P68254_K49	KO-WT	-0.0827479	0.125644	19.3593	0.517915	0.623962	0.285741	0.0827479	0.204842
1433T_MOUSE|P68254_K49	Early-Uninfected	0.259614	0.157682	19.3593	0.11581	0.358074	0.936254	0.259614	0.446027
1433T_MOUSE|P68254_K49	Late-Uninfected	0.116534	0.157682	19.3593	0.468747	0.675632	0.329061	0.116534	0.17029
1433T_MOUSE|P68254_K68	KO_Early-WT_Early	-0.385629	0.215568	8.35931	0.109816	0.247418	0.959335	0.385629	0.606569
1433T_MOUSE|P68254_K68	KO_Late-WT_Late	-0.368311	0.215568	8.35931	0.124287	0.294868	0.905574	0.368311	0.530373
1433T_MOUSE|P68254_K68	KO_Uninfected-WT_Uninfected	-0.220955	0.264016	8.35931	0.425926	0.624049	0.370665	0.220955	0.204781
1433T_MOUSE|P68254_K68	KO_Early-KO_Uninfected	0.0994728	0.215568	8.35931	0.65625	0.891368	0.18293	0.0994728	0.0499429
1433T_MOUSE|P68254_K68	KO_Late-KO_Uninfected	-0.22312	0.215568	8.35931	0.329665	0.656635	0.481927	0.22312	0.182676
1433T_MOUSE|P68254_K68	WT_Early-Wt_Uninfected	0.264147	0.264016	8.35931	0.345148	0.627065	0.461995	0.264147	0.202687
1433T_MOUSE|P68254_K68	WT_Late-Wt_Uninfected	-0.0757645	0.264016	8.35931	0.781121	0.904749	0.107282	0.0757645	0.0434718
1433T_MOUSE|P68254_K68	Infected-Uninfected	0.0161838	0.15243	8.35931	0.91795	0.961849	0.0371812	0.0161838	0.0168929
1433T_MOUSE|P68254_K68	KO-WT	-0.324965	0.13443	8.35931	0.0407619	0.0851175	1.38975	0.324965	1.06998
1433T_MOUSE|P68254_K68	Early-Uninfected	0.18181	0.170422	8.35931	0.31589	0.600476	0.500464	0.18181	0.221504
1433T_MOUSE|P68254_K68	Late-Uninfected	-0.149442	0.170422	8.35931	0.405037	0.619853	0.392505	0.149442	0.207711
1433T_MOUSE|P68254_K9	KO_Early-WT_Early	-0.308614	0.191306	19.3593	0.122885	0.26604	0.910501	0.308614	0.575053
1433T_MOUSE|P68254_K9	KO_Late-WT_Late	-0.139473	0.191306	19.3593	0.474695	0.671518	0.323585	0.139473	0.172942
1433T_MOUSE|P68254_K9	KO_Uninfected-WT_Uninfected	-0.208986	0.220902	19.3593	0.355779	0.561875	0.44882	0.208986	0.25036
1433T_MOUSE|P68254_K9	KO_Early-KO_Uninfected	-0.0365246	0.206635	19.3593	0.861534	0.96019	0.0647278	0.0365246	0.0176426
1433T_MOUSE|P68254_K9	KO_Late-KO_Uninfected	-0.289851	0.206635	19.3593	0.176534	0.499155	0.753172	0.289851	0.301765
1433T_MOUSE|P68254_K9	WT_Early-Wt_Uninfected	0.0631041	0.206635	19.3593	0.763328	0.902011	0.117289	0.0631041	0.0447884
1433T_MOUSE|P68254_K9	WT_Late-Wt_Uninfected	-0.359363	0.206635	19.3593	0.0978903	0.312681	1.00926	0.359363	0.504899
1433T_MOUSE|P68254_K9	Infected-Uninfected	-0.155659	0.129515	19.3593	0.243915	0.469831	0.612761	0.155659	0.328058
1433T_MOUSE|P68254_K9	KO-WT	-0.219024	0.116425	19.3593	0.0750655	0.137788	1.12456	0.219024	0.860788
1433T_MOUSE|P68254_K9	Early-Uninfected	0.0132898	0.146113	19.3593	0.928462	0.972554	0.0322357	0.0132898	0.0120863
1433T_MOUSE|P68254_K9	Late-Uninfected	-0.324607	0.146113	19.3593	0.0384169	0.151321	1.41548	0.324607	0.820099
1433Z_MOUSE|P63101_K138	KO_Early-WT_Early	-0.534382	0.181237	19.3593	0.00813463	0.0464653	2.08966	0.534382	1.33287
1433Z_MOUSE|P63101_K138	KO_Late-WT_Late	-0.526738	0.181237	19.3593	0.00893123	0.0632855	2.04909	0.526738	1.1987
1433Z_MOUSE|P63101_K138	KO_Uninfected-WT_Uninfected	-0.178843	0.209274	19.3593	0.403233	0.601965	0.394444	0.178843	0.220429
1433Z_MOUSE|P63101_K138	KO_Early-KO_Uninfected	-0.40003	0.195758	19.3593	0.0548539	0.344868	1.26079	0.40003	0.462347
1433Z_MOUSE|P63101_K138	KO_Late-KO_Uninfected	0.0217995	0.195758	19.3593	0.912478	0.975198	0.0397778	0.0217995	0.0109074
1433Z_MOUSE|P63101_K138	WT_Early-Wt_Uninfected	-0.0444907	0.195758	19.3593	0.822594	0.931673	0.0848146	0.0444907	0.0307364
1433Z_MOUSE|P63101_K138	WT_Late-Wt_Uninfected	0.369695	0.195758	19.3593	0.0740327	0.2665	1.13058	0.369695	0.574302
1433Z_MOUSE|P63101_K138	Infected-Uninfected	-0.0132565	0.122698	19.3593	0.915075	0.960954	0.0385434	0.0132565	0.0172974
1433Z_MOUSE|P63101_K138	KO-WT	-0.413321	0.110297	19.3593	0.00132848	0.00641181	2.87664	0.413321	2.19302
1433Z_MOUSE|P63101_K138	Early-Uninfected	-0.22226	0.138422	19.3593	0.124535	0.372222	0.904709	0.22226	0.429198
1433Z_MOUSE|P63101_K138	Late-Uninfected	0.195747	0.138422	19.3593	0.173203	0.381461	0.761444	0.195747	0.41855
1433Z_MOUSE|P63101_K139	KO_Early-WT_Early	-0.118134	0.188979	19.3593	0.539193	0.688871	0.268256	0.118134	0.161862
1433Z_MOUSE|P63101_K139	KO_Late-WT_Late	-0.0549898	0.188979	19.3593	0.774159	0.88023	0.11117	0.0549898	0.0554037
1433Z_MOUSE|P63101_K139	KO_Uninfected-WT_Uninfected	-0.563073	0.218214	19.3593	0.0181626	0.104401	1.74082	0.563073	0.981296
1433Z_MOUSE|P63101_K139	KO_Early-KO_Uninfected	0.145625	0.204121	19.3593	0.484094	0.813314	0.31507	0.145625	0.0897418
1433Z_MOUSE|P63101_K139	KO_Late-KO_Uninfected	0.216396	0.204121	19.3593	0.302131	0.633079	0.519805	0.216396	0.198542
1433Z_MOUSE|P63101_K139	WT_Early-Wt_Uninfected	-0.299313	0.204121	19.3593	0.158608	0.429125	0.799675	0.299313	0.367417
1433Z_MOUSE|P63101_K139	WT_Late-Wt_Uninfected	-0.291687	0.204121	19.3593	0.168944	0.418515	0.772257	0.291687	0.378289
1433Z_MOUSE|P63101_K139	Infected-Uninfected	-0.0572449	0.12794	19.3593	0.659526	0.81709	0.180768	0.0572449	0.08773
1433Z_MOUSE|P63101_K139	KO-WT	-0.245399	0.115009	19.3593	0.045864	0.0932222	1.33853	0.245399	1.03048
1433Z_MOUSE|P63101_K139	Early-Uninfected	-0.0768441	0.144335	19.3593	0.600507	0.81645	0.221482	0.0768441	0.0880704
1433Z_MOUSE|P63101_K139	Late-Uninfected	-0.0376456	0.144335	19.3593	0.796985	0.895677	0.0985498	0.0376456	0.0478486
1433Z_MOUSE|P63101_K74	KO_Early-WT_Early	-0.0723091	0.168675	8.35931	0.678983	0.798102	0.168141	0.0723091	0.0979416
1433Z_MOUSE|P63101_K74	KO_Late-WT_Late	-0.0704443	0.168675	8.35931	0.686737	0.827529	0.16321	0.0704443	0.0822168
1433Z_MOUSE|P63101_K74	KO_Uninfected-WT_Uninfected	-0.196715	0.206584	8.35931	0.367701	0.572483	0.434505	0.196715	0.242237
1433Z_MOUSE|P63101_K74	KO_Early-KO_Uninfected	0.169286	0.168675	8.35931	0.343726	0.725541	0.463788	0.169286	0.139338
1433Z_MOUSE|P63101_K74	KO_Late-KO_Uninfected	-0.0718704	0.168675	8.35931	0.680804	0.880261	0.166978	0.0718704	0.0553887
1433Z_MOUSE|P63101_K74	WT_Early-Wt_Uninfected	0.0448803	0.206584	8.35931	0.833223	0.93576	0.0792389	0.0448803	0.0288353
1433Z_MOUSE|P63101_K74	WT_Late-Wt_Uninfected	-0.198141	0.206584	8.35931	0.36441	0.628463	0.438409	0.198141	0.20172
1433Z_MOUSE|P63101_K74	Infected-Uninfected	-0.0139613	0.119271	8.35931	0.909581	0.959606	0.0411588	0.0139613	0.017907
1433Z_MOUSE|P63101_K74	KO-WT	-0.113156	0.105187	8.35931	0.312102	0.421631	0.505703	0.113156	0.375068
1433Z_MOUSE|P63101_K74	Early-Uninfected	0.107083	0.133349	8.35931	0.444191	0.707407	0.352431	0.107083	0.150331
1433Z_MOUSE|P63101_K74	Late-Uninfected	-0.135006	0.133349	8.35931	0.339742	0.560955	0.468851	0.135006	0.251072
1433Z_MOUSE|P63101_K9	KO_Early-WT_Early	0.237401	0.234071	19.3593	0.322984	0.498785	0.490819	0.237401	0.302086
1433Z_MOUSE|P63101_K9	KO_Late-WT_Late	0.0169802	0.234071	19.3593	0.942914	0.970255	0.0255278	0.0169802	0.0131142
1433Z_MOUSE|P63101_K9	KO_Uninfected-WT_Uninfected	0.26102	0.270282	19.3593	0.346088	0.553146	0.460813	0.26102	0.25716
1433Z_MOUSE|P63101_K9	KO_Early-KO_Uninfected	0.045279	0.252826	19.3593	0.859727	0.959328	0.0656396	0.045279	0.0180331
1433Z_MOUSE|P63101_K9	KO_Late-KO_Uninfected	-0.246357	0.252826	19.3593	0.341871	0.66743	0.466138	0.246357	0.175594
1433Z_MOUSE|P63101_K9	WT_Early-Wt_Uninfected	0.0688984	0.252826	19.3593	0.788113	0.912862	0.103412	0.0688984	0.039595
1433Z_MOUSE|P63101_K9	WT_Late-Wt_Uninfected	-0.00231678	0.252826	19.3593	0.992782	0.99781	0.00314592	0.00231678	0.00095195
1433Z_MOUSE|P63101_K9	Infected-Uninfected	-0.0336241	0.158467	19.3593	0.834182	0.91857	0.0787392	0.0336241	0.0368879
1433Z_MOUSE|P63101_K9	KO-WT	0.1718	0.142451	19.3593	0.242339	0.34487	0.615577	0.1718	0.462345
1433Z_MOUSE|P63101_K9	Early-Uninfected	0.0570887	0.178775	19.3593	0.752894	0.89775	0.123266	0.0570887	0.0468447
1433Z_MOUSE|P63101_K9	Late-Uninfected	-0.124337	0.178775	19.3593	0.495011	0.696596	0.305386	0.124337	0.157019
2A5G_MOUSE|Q60996_K156	KO_Early-WT_Early	-0.224978	0.211891	8.35931	0.318054	0.493481	0.497499	0.224978	0.30673
2A5G_MOUSE|Q60996_K156	KO_Late-WT_Late	0.0281396	0.211891	8.35931	0.897491	0.948154	0.0469697	0.0281396	0.0231209
2A5G_MOUSE|Q60996_K156	KO_Uninfected-WT_Uninfected	0.13644	0.259513	8.35931	0.612718	0.768452	0.212739	0.13644	0.114383
2A5G_MOUSE|Q60996_K156	KO_Early-KO_Uninfected	-0.186864	0.211891	8.35931	0.402482	0.763712	0.395253	0.186864	0.11707
2A5G_MOUSE|Q60996_K156	KO_Late-KO_Uninfected	-0.291024	0.211891	8.35931	0.205316	0.535676	0.687577	0.291024	0.271098
2A5G_MOUSE|Q60996_K156	WT_Early-Wt_Uninfected	0.174553	0.259513	8.35931	0.519347	0.762474	0.284542	0.174553	0.117775
2A5G_MOUSE|Q60996_K156	WT_Late-Wt_Uninfected	-0.182724	0.259513	8.35931	0.500509	0.737217	0.300588	0.182724	0.132404
2A5G_MOUSE|Q60996_K156	Infected-Uninfected	-0.121515	0.14983	8.35931	0.439833	0.656892	0.356712	0.121515	0.182506
2A5G_MOUSE|Q60996_K156	KO-WT	-0.0201329	0.132137	8.35931	0.882514	0.920102	0.0542783	0.0201329	0.0361638
2A5G_MOUSE|Q60996_K156	Early-Uninfected	-0.00615576	0.167515	8.35931	0.971549	0.990327	0.0125354	0.00615576	0.00422125
2A5G_MOUSE|Q60996_K156	Late-Uninfected	-0.236874	0.167515	8.35931	0.193492	0.404139	0.713336	0.236874	0.393469
2A5G_MOUSE|Q60996-2_K438	KO_Early-WT_Early	-0.519719	0.134733	19.3593	0.00103127	0.0129077	2.98663	0.519719	1.88915
2A5G_MOUSE|Q60996-2_K438	KO_Late-WT_Late	-0.312124	0.134733	19.3593	0.0316262	0.12952	1.49995	0.312124	0.887663
2A5G_MOUSE|Q60996-2_K438	KO_Uninfected-WT_Uninfected	-0.427121	0.155576	19.3593	0.0127168	0.085056	1.89562	0.427121	1.0703
2A5G_MOUSE|Q60996-2_K438	KO_Early-KO_Uninfected	0.181289	0.145528	19.3593	0.227729	0.623653	0.642582	0.181289	0.205057
2A5G_MOUSE|Q60996-2_K438	KO_Late-KO_Uninfected	0.104567	0.145528	19.3593	0.481012	0.765518	0.317844	0.104567	0.116044
2A5G_MOUSE|Q60996-2_K438	WT_Early-Wt_Uninfected	0.273887	0.145528	19.3593	0.0749545	0.290889	1.1252	0.273887	0.536272
2A5G_MOUSE|Q60996-2_K438	WT_Late-Wt_Uninfected	-0.0104293	0.145528	19.3593	0.943604	0.979407	0.0252103	0.0104293	0.00903697
2A5G_MOUSE|Q60996-2_K438	Infected-Uninfected	0.137329	0.0912147	19.3593	0.148324	0.350659	0.828788	0.137329	0.455114
2A5G_MOUSE|Q60996-2_K438	KO-WT	-0.419655	0.0819959	19.3593	5.77846e-05	0.000665824	4.23819	0.419655	3.17664
2A5G_MOUSE|Q60996-2_K438	Early-Uninfected	0.227588	0.102904	19.3593	0.0392018	0.193428	1.40669	0.227588	0.713481
2A5G_MOUSE|Q60996-2_K438	Late-Uninfected	0.0470688	0.102904	19.3593	0.652472	0.80898	0.185438	0.0470688	0.0920623
2AAA_MOUSE|Q76MZ3_K188	KO_Early-WT_Early	-0.291542	0.213171	19.3593	0.187091	0.350509	0.727947	0.291542	0.455301
2AAA_MOUSE|Q76MZ3_K188	KO_Late-WT_Late	-0.295776	0.213171	19.3593	0.181053	0.370063	0.742194	0.295776	0.431724
2AAA_MOUSE|Q76MZ3_K188	KO_Uninfected-WT_Uninfected	-0.0608074	0.246148	19.3593	0.807481	0.899151	0.0928675	0.0608074	0.0461672
2AAA_MOUSE|Q76MZ3_K188	KO_Early-KO_Uninfected	0.153327	0.23025	19.3593	0.513325	0.828463	0.289608	0.153327	0.0817269
2AAA_MOUSE|Q76MZ3_K188	KO_Late-KO_Uninfected	0.0810602	0.23025	19.3593	0.728602	0.904327	0.137509	0.0810602	0.0436743
2AAA_MOUSE|Q76MZ3_K188	WT_Early-Wt_Uninfected	0.384061	0.23025	19.3593	0.111407	0.357036	0.953086	0.384061	0.447288
2AAA_MOUSE|Q76MZ3_K188	WT_Late-Wt_Uninfected	0.316028	0.23025	19.3593	0.185588	0.439832	0.731449	0.316028	0.356713
2AAA_MOUSE|Q76MZ3_K188	Infected-Uninfected	0.233619	0.144317	19.3593	0.121669	0.31036	0.914819	0.233619	0.508134
2AAA_MOUSE|Q76MZ3_K188	KO-WT	-0.216042	0.129731	19.3593	0.111954	0.18819	0.950962	0.216042	0.725404
2AAA_MOUSE|Q76MZ3_K188	Early-Uninfected	0.268694	0.162812	19.3593	0.115005	0.356767	0.939283	0.268694	0.447616
2AAA_MOUSE|Q76MZ3_K188	Late-Uninfected	0.198544	0.162812	19.3593	0.237315	0.454295	0.624675	0.198544	0.342662
2AAA_MOUSE|Q76MZ3_K266	KO_Early-WT_Early	-0.342568	0.166072	19.3593	0.0528096	0.155337	1.27729	0.342568	0.808726
2AAA_MOUSE|Q76MZ3_K266	KO_Late-WT_Late	-0.271308	0.166072	19.3593	0.118485	0.285793	0.926338	0.271308	0.543948
2AAA_MOUSE|Q76MZ3_K266	KO_Uninfected-WT_Uninfected	-0.109249	0.191763	19.3593	0.575428	0.741877	0.240009	0.109249	0.129668
2AAA_MOUSE|Q76MZ3_K266	KO_Early-KO_Uninfected	0.276584	0.179378	19.3593	0.139285	0.515408	0.856096	0.276584	0.287849
2AAA_MOUSE|Q76MZ3_K266	KO_Late-KO_Uninfected	0.352007	0.179378	19.3593	0.064255	0.30505	1.19209	0.352007	0.515629
2AAA_MOUSE|Q76MZ3_K266	WT_Early-Wt_Uninfected	0.509903	0.179378	19.3593	0.0102791	0.0987489	1.98804	0.509903	1.00547
2AAA_MOUSE|Q76MZ3_K266	WT_Late-Wt_Uninfected	0.514065	0.179378	19.3593	0.00976726	0.0796126	2.01023	0.514065	1.09902
2AAA_MOUSE|Q76MZ3_K266	Infected-Uninfected	0.41314	0.112431	19.3593	0.00157018	0.0172841	2.80405	0.41314	1.76235
2AAA_MOUSE|Q76MZ3_K266	KO-WT	-0.241042	0.101068	19.3593	0.0274473	0.0627997	1.5615	0.241042	1.20204
2AAA_MOUSE|Q76MZ3_K266	Early-Uninfected	0.393244	0.12684	19.3593	0.00579739	0.0579229	2.23677	0.393244	1.23715
2AAA_MOUSE|Q76MZ3_K266	Late-Uninfected	0.433036	0.12684	19.3593	0.00285063	0.0252097	2.54506	0.433036	1.59843
2AAA_MOUSE|Q76MZ3_K272	KO_Early-WT_Early	-0.109029	0.195202	19.3593	0.582876	0.724417	0.234424	0.109029	0.140011
2AAA_MOUSE|Q76MZ3_K272	KO_Late-WT_Late	0.111475	0.195202	19.3593	0.574517	0.748144	0.240697	0.111475	0.126015
2AAA_MOUSE|Q76MZ3_K272	KO_Uninfected-WT_Uninfected	-0.266294	0.225399	19.3593	0.251743	0.459247	0.599043	0.266294	0.337954
2AAA_MOUSE|Q76MZ3_K272	KO_Early-KO_Uninfected	-0.729569	0.210842	19.3593	0.00256537	0.0610259	2.59085	0.729569	1.21449
2AAA_MOUSE|Q76MZ3_K272	KO_Late-KO_Uninfected	-0.503535	0.210842	19.3593	0.0272608	0.19407	1.56446	0.503535	0.712042
2AAA_MOUSE|Q76MZ3_K272	WT_Early-Wt_Uninfected	-0.886834	0.210842	19.3593	0.000461842	0.0135555	3.33551	0.886834	1.86789
2AAA_MOUSE|Q76MZ3_K272	WT_Late-Wt_Uninfected	-0.881304	0.210842	19.3593	0.000490585	0.0101743	3.30929	0.881304	1.99249
2AAA_MOUSE|Q76MZ3_K272	Infected-Uninfected	-0.75031	0.132152	19.3593	1.67004e-05	0.000577293	4.77727	0.75031	3.2386
2AAA_MOUSE|Q76MZ3_K272	KO-WT	-0.087949	0.118796	19.3593	0.46798	0.578306	0.329773	0.087949	0.237842
2AAA_MOUSE|Q76MZ3_K272	Early-Uninfected	-0.808201	0.149088	19.3593	2.93881e-05	0.00123225	4.53183	0.808201	2.9093
2AAA_MOUSE|Q76MZ3_K272	Late-Uninfected	-0.69242	0.149088	19.3593	0.000169005	0.0030074	3.7721	0.69242	2.52181
2AAA_MOUSE|Q76MZ3_K307	KO_Early-WT_Early	0.565346	0.159094	8.35931	0.00695782	0.0419973	2.15753	0.565346	1.37678
2AAA_MOUSE|Q76MZ3_K307	KO_Late-WT_Late	0.20095	0.159094	8.35931	0.240647	0.443658	0.61862	0.20095	0.352952
2AAA_MOUSE|Q76MZ3_K307	KO_Uninfected-WT_Uninfected	0.127569	0.194849	8.35931	0.530256	0.707077	0.275515	0.127569	0.150534
2AAA_MOUSE|Q76MZ3_K307	KO_Early-KO_Uninfected	0.312988	0.159094	8.35931	0.0831442	0.41273	1.08017	0.312988	0.384334
2AAA_MOUSE|Q76MZ3_K307	KO_Late-KO_Uninfected	-0.167687	0.159094	8.35931	0.321387	0.64996	0.492972	0.167687	0.187114
2AAA_MOUSE|Q76MZ3_K307	WT_Early-Wt_Uninfected	-0.124789	0.194849	8.35931	0.539042	0.774246	0.268378	0.124789	0.111121
2AAA_MOUSE|Q76MZ3_K307	WT_Late-Wt_Uninfected	-0.241068	0.194849	8.35931	0.249638	0.513582	0.60269	0.241068	0.28939
2AAA_MOUSE|Q76MZ3_K307	Infected-Uninfected	-0.0551388	0.112496	8.35931	0.636641	0.802693	0.196106	0.0551388	0.0954505
2AAA_MOUSE|Q76MZ3_K307	KO-WT	0.297955	0.0992123	8.35931	0.0161596	0.0414891	1.79157	0.297955	1.38207
2AAA_MOUSE|Q76MZ3_K307	Early-Uninfected	0.0940994	0.125775	8.35931	0.474884	0.729934	0.323412	0.0940994	0.136716
2AAA_MOUSE|Q76MZ3_K307	Late-Uninfected	-0.204377	0.125775	8.35931	0.141203	0.339762	0.850157	0.204377	0.468825
2AAA_MOUSE|Q76MZ3_K546	KO_Early-WT_Early	-0.205762	0.208103	8.35931	0.350538	0.524934	0.455265	0.205762	0.279895
2AAA_MOUSE|Q76MZ3_K546	KO_Late-WT_Late	-0.0345942	0.208103	8.35931	0.871922	0.934483	0.0595223	0.0345942	0.0294287
2AAA_MOUSE|Q76MZ3_K546	KO_Uninfected-WT_Uninfected	-0.427716	0.254873	8.35931	0.13021	0.314207	0.885355	0.427716	0.502785
2AAA_MOUSE|Q76MZ3_K546	KO_Early-KO_Uninfected	0.570496	0.208103	8.35931	0.0243779	0.234362	1.613	0.570496	0.630112
2AAA_MOUSE|Q76MZ3_K546	KO_Late-KO_Uninfected	0.419094	0.208103	8.35931	0.077276	0.333558	1.11196	0.419094	0.476828
2AAA_MOUSE|Q76MZ3_K546	WT_Early-Wt_Uninfected	0.348542	0.254873	8.35931	0.2071	0.487768	0.68382	0.348542	0.311787
2AAA_MOUSE|Q76MZ3_K546	WT_Late-Wt_Uninfected	0.0259724	0.254873	8.35931	0.921236	0.969268	0.0356292	0.0259724	0.0135561
2AAA_MOUSE|Q76MZ3_K546	Infected-Uninfected	0.341026	0.147151	8.35931	0.0477735	0.176533	1.32081	0.341026	0.753175
2AAA_MOUSE|Q76MZ3_K546	KO-WT	-0.222691	0.129775	8.35931	0.12288	0.202203	0.910518	0.222691	0.694212
2AAA_MOUSE|Q76MZ3_K546	Early-Uninfected	0.459519	0.16452	8.35931	0.0224687	0.137753	1.64842	0.459519	0.860899
2AAA_MOUSE|Q76MZ3_K546	Late-Uninfected	0.222533	0.16452	8.35931	0.211625	0.427008	0.674433	0.222533	0.369564
2ABA_MOUSE|Q6P1F6_K117	KO_Early-WT_Early	0.727419	0.173868	19.3593	0.000486287	0.00802453	3.31311	0.727419	2.09558
2ABA_MOUSE|Q6P1F6_K117	KO_Late-WT_Late	0.482482	0.173868	19.3593	0.0119216	0.0726517	1.92366	0.482482	1.13875
2ABA_MOUSE|Q6P1F6_K117	KO_Uninfected-WT_Uninfected	0.475453	0.200765	19.3593	0.0284205	0.135523	1.54637	0.475453	0.867987
2ABA_MOUSE|Q6P1F6_K117	KO_Early-KO_Uninfected	0.0875026	0.187798	19.3593	0.646459	0.887125	0.189459	0.0875026	0.0520152
2ABA_MOUSE|Q6P1F6_K117	KO_Late-KO_Uninfected	0.0943284	0.187798	19.3593	0.621132	0.848624	0.206816	0.0943284	0.0712847
2ABA_MOUSE|Q6P1F6_K117	WT_Early-Wt_Uninfected	-0.164463	0.187798	19.3593	0.391907	0.670232	0.406817	0.164463	0.173775
2ABA_MOUSE|Q6P1F6_K117	WT_Late-Wt_Uninfected	0.0872994	0.187798	19.3593	0.64722	0.830166	0.188948	0.0872994	0.0808351
2ABA_MOUSE|Q6P1F6_K117	Infected-Uninfected	0.0261668	0.117709	19.3593	0.826408	0.913667	0.0828056	0.0261668	0.0392121
2ABA_MOUSE|Q6P1F6_K117	KO-WT	0.561785	0.105812	19.3593	3.76693e-05	0.000471765	4.42401	0.561785	3.32627
2ABA_MOUSE|Q6P1F6_K117	Early-Uninfected	-0.0384802	0.132794	19.3593	0.77507	0.906704	0.110659	0.0384802	0.0425343
2ABA_MOUSE|Q6P1F6_K117	Late-Uninfected	0.0908139	0.132794	19.3593	0.50216	0.702695	0.299158	0.0908139	0.153233
3BHS7_MOUSE|Q9EQC1_K99	KO_Early-WT_Early	-0.251487	0.200225	8.35931	0.243075	0.415327	0.614261	0.251487	0.38161
3BHS7_MOUSE|Q9EQC1_K99	KO_Late-WT_Late	-0.2968	0.200225	8.35931	0.174937	0.362194	0.757117	0.2968	0.441059
3BHS7_MOUSE|Q9EQC1_K99	KO_Uninfected-WT_Uninfected	0.246265	0.245224	8.35931	0.343442	0.550551	0.464147	0.246265	0.259202
3BHS7_MOUSE|Q9EQC1_K99	KO_Early-KO_Uninfected	0.113981	0.200225	8.35931	0.584144	0.857902	0.23348	0.113981	0.0665624
3BHS7_MOUSE|Q9EQC1_K99	KO_Late-KO_Uninfected	-0.900448	0.200225	8.35931	0.00179963	0.0352012	2.74482	0.900448	1.45344
3BHS7_MOUSE|Q9EQC1_K99	WT_Early-Wt_Uninfected	0.611733	0.245224	8.35931	0.0360515	0.197613	1.44308	0.611733	0.704184
3BHS7_MOUSE|Q9EQC1_K99	WT_Late-Wt_Uninfected	-0.357383	0.245224	8.35931	0.181531	0.434849	0.74105	0.357383	0.361661
3BHS7_MOUSE|Q9EQC1_K99	Infected-Uninfected	-0.133029	0.14158	8.35931	0.373776	0.598603	0.427388	0.133029	0.222861
3BHS7_MOUSE|Q9EQC1_K99	KO-WT	-0.100674	0.124862	8.35931	0.442413	0.552854	0.354172	0.100674	0.257389
3BHS7_MOUSE|Q9EQC1_K99	Early-Uninfected	0.362857	0.158292	8.35931	0.049725	0.221769	1.30342	0.362857	0.6541
3BHS7_MOUSE|Q9EQC1_K99	Late-Uninfected	-0.628915	0.158292	8.35931	0.00375436	0.0305848	2.42546	0.628915	1.51449
3BP2_MOUSE|Q06649_K35	KO_Early-WT_Early	0.579401	0.177798	8.35931	0.0108808	0.056166	1.96334	0.579401	1.25053
3BP2_MOUSE|Q06649_K35	KO_Late-WT_Late	0.840592	0.177798	8.35931	0.0013188	0.0199911	2.87982	0.840592	1.69916
3BP2_MOUSE|Q06649_K35	KO_Uninfected-WT_Uninfected	1.13342	0.217757	8.35931	0.000710373	0.0152656	3.14851	1.13342	1.81629
3BP2_MOUSE|Q06649_K35	KO_Early-KO_Uninfected	-0.421806	0.177798	8.35931	0.0437822	0.313181	1.3587	0.421806	0.504205
3BP2_MOUSE|Q06649_K35	KO_Late-KO_Uninfected	-0.296915	0.177798	8.35931	0.13185	0.433426	0.879921	0.296915	0.363085
3BP2_MOUSE|Q06649_K35	WT_Early-Wt_Uninfected	0.132216	0.217757	8.35931	0.559864	0.788681	0.251918	0.132216	0.103098
3BP2_MOUSE|Q06649_K35	WT_Late-Wt_Uninfected	-0.00408396	0.217757	8.35931	0.985477	0.995986	0.00635361	0.00408396	0.00174677
3BP2_MOUSE|Q06649_K35	Infected-Uninfected	-0.147647	0.125722	8.35931	0.272605	0.500143	0.564466	0.147647	0.300906
3BP2_MOUSE|Q06649_K35	KO-WT	0.851139	0.110876	8.35931	4.62517e-05	0.000554154	4.33487	0.851139	3.25637
3BP2_MOUSE|Q06649_K35	Early-Uninfected	-0.144795	0.140561	8.35931	0.331835	0.614395	0.479078	0.144795	0.211552
3BP2_MOUSE|Q06649_K35	Late-Uninfected	-0.1505	0.140561	8.35931	0.31424	0.535366	0.502738	0.1505	0.271349
3BP5_MOUSE|Q9Z131_K220	KO_Early-WT_Early	0.00882992	0.246863	19.3593	0.971833	0.985185	0.0124083	0.00882992	0.00648213
3BP5_MOUSE|Q9Z131_K220	KO_Late-WT_Late	-0.391188	0.246863	19.3593	0.129249	0.301523	0.888572	0.391188	0.52068
3BP5_MOUSE|Q9Z131_K220	KO_Uninfected-WT_Uninfected	0.759723	0.285053	19.3593	0.0151343	0.0934271	1.82004	0.759723	1.02953
3BP5_MOUSE|Q9Z131_K220	KO_Early-KO_Uninfected	-0.0198176	0.266643	19.3593	0.941516	0.985148	0.0261722	0.0198176	0.0064984
3BP5_MOUSE|Q9Z131_K220	KO_Late-KO_Uninfected	-0.588153	0.266643	19.3593	0.0396724	0.237616	1.40151	0.588153	0.624124
3BP5_MOUSE|Q9Z131_K220	WT_Early-Wt_Uninfected	0.731076	0.266643	19.3593	0.0128177	0.111382	1.89219	0.731076	0.953185
3BP5_MOUSE|Q9Z131_K220	WT_Late-Wt_Uninfected	0.562758	0.266643	19.3593	0.0480382	0.209044	1.31841	0.562758	0.679763
3BP5_MOUSE|Q9Z131_K220	Infected-Uninfected	0.171466	0.167127	19.3593	0.31756	0.546555	0.498175	0.171466	0.262366
3BP5_MOUSE|Q9Z131_K220	KO-WT	0.125788	0.150236	19.3593	0.412658	0.524511	0.38441	0.125788	0.280246
3BP5_MOUSE|Q9Z131_K220	Early-Uninfected	0.355629	0.188545	19.3593	0.074365	0.281059	1.12863	0.355629	0.551202
3BP5_MOUSE|Q9Z131_K220	Late-Uninfected	-0.0126971	0.188545	19.3593	0.947	0.973448	0.0236502	0.0126971	0.0116873
3BP5_MOUSE|Q9Z131_K435	KO_Early-WT_Early	-0.101338	0.271227	8.35931	0.717979	0.826881	0.143888	0.101338	0.0825572
3BP5_MOUSE|Q9Z131_K435	KO_Late-WT_Late	-0.393789	0.271227	8.35931	0.183011	0.372502	0.737523	0.393789	0.428871
3BP5_MOUSE|Q9Z131_K435	KO_Uninfected-WT_Uninfected	0.277095	0.332184	8.35931	0.427384	0.625245	0.369181	0.277095	0.20395
3BP5_MOUSE|Q9Z131_K435	KO_Early-KO_Uninfected	0.793494	0.271227	8.35931	0.0182452	0.20111	1.73885	0.793494	0.696565
3BP5_MOUSE|Q9Z131_K435	KO_Late-KO_Uninfected	-0.0860177	0.271227	8.35931	0.758912	0.917213	0.119808	0.0860177	0.0375297
3BP5_MOUSE|Q9Z131_K435	WT_Early-Wt_Uninfected	1.17193	0.332184	8.35931	0.00723029	0.0799392	2.14084	1.17193	1.09724
3BP5_MOUSE|Q9Z131_K435	WT_Late-Wt_Uninfected	0.584865	0.332184	8.35931	0.114712	0.34035	0.940391	0.584865	0.468074
3BP5_MOUSE|Q9Z131_K435	Infected-Uninfected	0.616067	0.191787	8.35931	0.0116871	0.0716192	1.93229	0.616067	1.14497
3BP5_MOUSE|Q9Z131_K435	KO-WT	-0.0726775	0.16914	8.35931	0.678284	0.761321	0.168588	0.0726775	0.118432
3BP5_MOUSE|Q9Z131_K435	Early-Uninfected	0.982711	0.214424	8.35931	0.00160154	0.0231432	2.79546	0.982711	1.63558
3BP5_MOUSE|Q9Z131_K435	Late-Uninfected	0.249424	0.214424	8.35931	0.276865	0.497346	0.557732	0.249424	0.303341
41_MOUSE|P48193_K500	KO_Early-WT_Early	-0.614684	0.20702	8.35931	0.0170408	0.0744745	1.76851	0.614684	1.12799
41_MOUSE|P48193_K500	KO_Late-WT_Late	-0.550969	0.20702	8.35931	0.0276653	0.119289	1.55806	0.550969	0.923401
41_MOUSE|P48193_K500	KO_Uninfected-WT_Uninfected	-0.400083	0.253546	8.35931	0.151609	0.343403	0.819275	0.400083	0.464196
41_MOUSE|P48193_K500	KO_Early-KO_Uninfected	0.302657	0.20702	8.35931	0.1803	0.575081	0.744005	0.302657	0.240271
41_MOUSE|P48193_K500	KO_Late-KO_Uninfected	-0.00907838	0.20702	8.35931	0.966051	0.991495	0.0149998	0.00907838	0.00370965
41_MOUSE|P48193_K500	WT_Early-Wt_Uninfected	0.517257	0.253546	8.35931	0.0741498	0.289856	1.12989	0.517257	0.537818
41_MOUSE|P48193_K500	WT_Late-Wt_Uninfected	0.141807	0.253546	8.35931	0.590626	0.797886	0.228687	0.141807	0.0980591
41_MOUSE|P48193_K500	Infected-Uninfected	0.238161	0.146385	8.35931	0.140775	0.339959	0.851475	0.238161	0.468573
41_MOUSE|P48193_K500	KO-WT	-0.521912	0.129099	8.35931	0.00339736	0.0127754	2.46886	0.521912	1.89363
41_MOUSE|P48193_K500	Early-Uninfected	0.409957	0.163663	8.35931	0.0354667	0.182525	1.45018	0.409957	0.738677
41_MOUSE|P48193_K500	Late-Uninfected	0.0663645	0.163663	8.35931	0.695295	0.83589	0.157831	0.0663645	0.0778507
41_MOUSE|P48193_K747	KO_Early-WT_Early	-1.02759	0.191623	8.35931	0.000583276	0.00892002	3.23413	1.02759	2.04963
41_MOUSE|P48193_K747	KO_Late-WT_Late	-0.726084	0.191623	8.35931	0.00490628	0.0442484	2.30925	0.726084	1.3541
41_MOUSE|P48193_K747	KO_Uninfected-WT_Uninfected	-1.08227	0.23469	8.35931	0.00154118	0.0241269	2.81215	1.08227	1.6175
41_MOUSE|P48193_K747	KO_Early-KO_Uninfected	0.0409678	0.191623	8.35931	0.835831	0.952403	0.0778814	0.0409678	0.0211794
41_MOUSE|P48193_K747	KO_Late-KO_Uninfected	-0.237556	0.191623	8.35931	0.248756	0.58514	0.604226	0.237556	0.23274
41_MOUSE|P48193_K747	WT_Early-Wt_Uninfected	-0.0137114	0.23469	8.35931	0.954784	0.983728	0.0200949	0.0137114	0.00712475
41_MOUSE|P48193_K747	WT_Late-Wt_Uninfected	-0.593739	0.23469	8.35931	0.034085	0.169766	1.46744	0.593739	0.770148
41_MOUSE|P48193_K747	Infected-Uninfected	-0.20101	0.135498	8.35931	0.174638	0.385772	0.757861	0.20101	0.413669
41_MOUSE|P48193_K747	KO-WT	-0.945313	0.119498	8.35931	3.69804e-05	0.000464274	4.43203	0.945313	3.33323
41_MOUSE|P48193_K747	Early-Uninfected	0.0136282	0.151492	8.35931	0.930437	0.973427	0.0313129	0.0136282	0.0116966
41_MOUSE|P48193_K747	Late-Uninfected	-0.415648	0.151492	8.35931	0.0242898	0.111952	1.61458	0.415648	0.950969
4F2_MOUSE|P10852_K150	KO_Early-WT_Early	1.69218	0.270696	8.35931	0.000204231	0.00468495	3.68988	1.69218	2.3293
4F2_MOUSE|P10852_K150	KO_Late-WT_Late	1.60492	0.270696	8.35931	0.000295299	0.00851126	3.52974	1.60492	2.07001
4F2_MOUSE|P10852_K150	KO_Uninfected-WT_Uninfected	1.5509	0.331533	8.35931	0.0014095	0.0228983	2.85094	1.5509	1.6402
4F2_MOUSE|P10852_K150	KO_Early-KO_Uninfected	0.0335539	0.270696	8.35931	0.90428	0.975256	0.0436968	0.0335539	0.0108813
4F2_MOUSE|P10852_K150	KO_Late-KO_Uninfected	0.0063969	0.270696	8.35931	0.981701	0.996109	0.00802073	0.0063969	0.00169335
4F2_MOUSE|P10852_K150	WT_Early-Wt_Uninfected	-0.107726	0.331533	8.35931	0.753214	0.896913	0.123081	0.107726	0.0472496
4F2_MOUSE|P10852_K150	WT_Late-Wt_Uninfected	-0.047621	0.331533	8.35931	0.889188	0.954906	0.0510063	0.047621	0.0200395
4F2_MOUSE|P10852_K150	Infected-Uninfected	-0.0288492	0.191411	8.35931	0.883771	0.945262	0.0536601	0.0288492	0.0244479
4F2_MOUSE|P10852_K150	KO-WT	1.616	0.168808	8.35931	8.67177e-06	0.000157044	5.06189	1.616	3.80398
4F2_MOUSE|P10852_K150	Early-Uninfected	-0.0370863	0.214004	8.35931	0.866541	0.948998	0.0622111	0.0370863	0.0227348
4F2_MOUSE|P10852_K150	Late-Uninfected	-0.020612	0.214004	8.35931	0.925539	0.962507	0.0336055	0.020612	0.0165959
4F2_MOUSE|P10852_K162	KO_Early-WT_Early	0.869221	0.22722	8.35931	0.00465196	0.0330975	2.33236	0.869221	1.4802
4F2_MOUSE|P10852_K162	KO_Late-WT_Late	0.569979	0.22722	8.35931	0.0352637	0.137507	1.45267	0.569979	0.861675
4F2_MOUSE|P10852_K162	KO_Uninfected-WT_Uninfected	0.697531	0.278286	8.35931	0.0353741	0.151335	1.45132	0.697531	0.820061
4F2_MOUSE|P10852_K162	KO_Early-KO_Uninfected	0.336248	0.22722	8.35931	0.175587	0.5691	0.755508	0.336248	0.244812
4F2_MOUSE|P10852_K162	KO_Late-KO_Uninfected	0.0163546	0.22722	8.35931	0.944313	0.986955	0.0248842	0.0163546	0.00570258
4F2_MOUSE|P10852_K162	WT_Early-Wt_Uninfected	0.164558	0.278286	8.35931	0.569942	0.795648	0.244169	0.164558	0.0992792
4F2_MOUSE|P10852_K162	WT_Late-Wt_Uninfected	0.143907	0.278286	8.35931	0.618475	0.813527	0.208678	0.143907	0.0896281
4F2_MOUSE|P10852_K162	Infected-Uninfected	0.165267	0.160669	8.35931	0.332499	0.562057	0.47821	0.165267	0.25022
4F2_MOUSE|P10852_K162	KO-WT	0.712243	0.141696	8.35931	0.000891873	0.0048336	3.0497	0.712243	2.31573
4F2_MOUSE|P10852_K162	Early-Uninfected	0.250403	0.179633	8.35931	0.199265	0.479537	0.70057	0.250403	0.319178
4F2_MOUSE|P10852_K162	Late-Uninfected	0.0801309	0.179633	8.35931	0.666868	0.818169	0.17596	0.0801309	0.0871572
4F2_MOUSE|P10852_K191	KO_Early-WT_Early	1.17277	0.210299	8.35931	0.000448636	0.00763727	3.34811	1.17277	2.11706
4F2_MOUSE|P10852_K191	KO_Late-WT_Late	1.01833	0.210299	8.35931	0.00113349	0.018322	2.94558	1.01833	1.73703
4F2_MOUSE|P10852_K191	KO_Uninfected-WT_Uninfected	1.19669	0.257563	8.35931	0.0014708	0.0233978	2.83245	1.19669	1.63082
4F2_MOUSE|P10852_K191	KO_Early-KO_Uninfected	-0.0533371	0.210299	8.35931	0.805913	0.943572	0.0937121	0.0533371	0.0252251
4F2_MOUSE|P10852_K191	KO_Late-KO_Uninfected	-0.325985	0.210299	8.35931	0.158098	0.472359	0.801075	0.325985	0.325728
4F2_MOUSE|P10852_K191	WT_Early-Wt_Uninfected	-0.0294156	0.257563	8.35931	0.911769	0.969483	0.0401152	0.0294156	0.0134598
4F2_MOUSE|P10852_K191	WT_Late-Wt_Uninfected	-0.147621	0.257563	8.35931	0.581632	0.793212	0.235352	0.147621	0.100611
4F2_MOUSE|P10852_K191	Infected-Uninfected	-0.13909	0.148704	8.35931	0.37584	0.600405	0.424997	0.13909	0.221556
4F2_MOUSE|P10852_K191	KO-WT	1.12926	0.131145	8.35931	1.95244e-05	0.000288804	4.70942	1.12926	3.5394
4F2_MOUSE|P10852_K191	Early-Uninfected	-0.0413763	0.166256	8.35931	0.809466	0.920089	0.0918011	0.0413763	0.0361702
4F2_MOUSE|P10852_K191	Late-Uninfected	-0.236803	0.166256	8.35931	0.190593	0.400359	0.719892	0.236803	0.39755
4F2_MOUSE|P10852_K21	KO_Early-WT_Early	0.691533	0.26356	19.3593	0.0165464	0.0732567	1.7813	0.691533	1.13515
4F2_MOUSE|P10852_K21	KO_Late-WT_Late	0.9486	0.26356	19.3593	0.00186684	0.0243332	2.72889	0.9486	1.6138
4F2_MOUSE|P10852_K21	KO_Uninfected-WT_Uninfected	-0.250172	0.304333	19.3593	0.421067	0.619448	0.375649	0.250172	0.207995
4F2_MOUSE|P10852_K21	KO_Early-KO_Uninfected	0.238415	0.284678	19.3593	0.412536	0.771168	0.384538	0.238415	0.112851
4F2_MOUSE|P10852_K21	KO_Late-KO_Uninfected	0.923902	0.284678	19.3593	0.0041807	0.0632086	2.37875	0.923902	1.19922
4F2_MOUSE|P10852_K21	WT_Early-Wt_Uninfected	-0.70329	0.284678	19.3593	0.0229396	0.154797	1.63941	0.70329	0.810238
4F2_MOUSE|P10852_K21	WT_Late-Wt_Uninfected	-0.27487	0.284678	19.3593	0.346177	0.611277	0.460702	0.27487	0.213762
4F2_MOUSE|P10852_K21	Infected-Uninfected	0.0460392	0.178431	19.3593	0.799113	0.898631	0.097392	0.0460392	0.0464185
4F2_MOUSE|P10852_K21	KO-WT	0.46332	0.160398	19.3593	0.0092891	0.0273816	2.03203	0.46332	1.56254
4F2_MOUSE|P10852_K21	Early-Uninfected	-0.232437	0.201297	19.3593	0.26227	0.547944	0.581252	0.232437	0.261264
4F2_MOUSE|P10852_K21	Late-Uninfected	0.324516	0.201297	19.3593	0.123119	0.312202	0.909675	0.324516	0.505565
4F2_MOUSE|P10852_K35	KO_Early-WT_Early	0.103791	0.207113	19.3593	0.62193	0.755928	0.206258	0.103791	0.12152
4F2_MOUSE|P10852_K35	KO_Late-WT_Late	0.22426	0.207113	19.3593	0.292206	0.499808	0.534311	0.22426	0.301197
4F2_MOUSE|P10852_K35	KO_Uninfected-WT_Uninfected	0.104448	0.239154	19.3593	0.667133	0.808895	0.175788	0.104448	0.0921079
4F2_MOUSE|P10852_K35	KO_Early-KO_Uninfected	-0.126865	0.223708	19.3593	0.577163	0.855536	0.238702	0.126865	0.0677619
4F2_MOUSE|P10852_K35	KO_Late-KO_Uninfected	0.937832	0.223708	19.3593	0.000476905	0.0126392	3.32157	0.937832	1.89828
4F2_MOUSE|P10852_K35	WT_Early-Wt_Uninfected	-0.126208	0.223708	19.3593	0.579121	0.802113	0.237231	0.126208	0.0957642
4F2_MOUSE|P10852_K35	WT_Late-Wt_Uninfected	0.81802	0.223708	19.3593	0.00163628	0.0248012	2.78614	0.81802	1.60553
4F2_MOUSE|P10852_K35	Infected-Uninfected	0.375695	0.140216	19.3593	0.0146769	0.082197	1.83337	0.375695	1.08514
4F2_MOUSE|P10852_K35	KO-WT	0.144166	0.126045	19.3593	0.266668	0.371939	0.57403	0.144166	0.429528
4F2_MOUSE|P10852_K35	Early-Uninfected	-0.126536	0.158185	19.3593	0.433461	0.70037	0.36305	0.126536	0.154673
4F2_MOUSE|P10852_K35	Late-Uninfected	0.877926	0.158185	19.3593	2.21006e-05	0.000626409	4.6556	0.877926	3.20314
4F2_MOUSE|P10852_K40	KO_Early-WT_Early	0.000412953	0.217241	8.35931	0.998528	0.999351	0.000639801	0.000412953	0.00028189
4F2_MOUSE|P10852_K40	KO_Late-WT_Late	0.308887	0.217241	8.35931	0.191285	0.383051	0.71832	0.308887	0.416743
4F2_MOUSE|P10852_K40	KO_Uninfected-WT_Uninfected	0.138394	0.266065	8.35931	0.616449	0.771523	0.210103	0.138394	0.112651
4F2_MOUSE|P10852_K40	KO_Early-KO_Uninfected	-0.0427418	0.217241	8.35931	0.848724	0.957855	0.0712336	0.0427418	0.0187003
4F2_MOUSE|P10852_K40	KO_Late-KO_Uninfected	1.03057	0.217241	8.35931	0.00129083	0.0274536	2.88913	1.03057	1.5614
4F2_MOUSE|P10852_K40	WT_Early-Wt_Uninfected	0.0952393	0.266065	8.35931	0.729247	0.886194	0.137125	0.0952393	0.0524711
4F2_MOUSE|P10852_K40	WT_Late-Wt_Uninfected	0.860081	0.266065	8.35931	0.0113269	0.0874606	1.94589	0.860081	1.05819
4F2_MOUSE|P10852_K40	Infected-Uninfected	0.485788	0.153612	8.35931	0.0126204	0.0749026	1.89893	0.485788	1.1255
4F2_MOUSE|P10852_K40	KO-WT	0.149231	0.135473	8.35931	0.301359	0.409714	0.520915	0.149231	0.387519
4F2_MOUSE|P10852_K40	Early-Uninfected	0.0262487	0.171744	8.35931	0.882152	0.955034	0.0544564	0.0262487	0.0199814
4F2_MOUSE|P10852_K40	Late-Uninfected	0.945327	0.171744	8.35931	0.000489917	0.00674675	3.30988	0.945327	2.17091
4F2_MOUSE|P10852_K40_K42	KO_Early-WT_Early	0.0999335	0.460901	8.35931	0.833546	0.899294	0.0790706	0.0999335	0.0460983
4F2_MOUSE|P10852_K40_K42	KO_Late-WT_Late	0.950699	0.460901	8.35931	0.0715523	0.210865	1.14538	0.950699	0.675996
4F2_MOUSE|P10852_K40_K42	KO_Uninfected-WT_Uninfected	0.215379	0.564486	8.35931	0.712313	0.838367	0.147329	0.215379	0.0765659
4F2_MOUSE|P10852_K40_K42	KO_Early-KO_Uninfected	-0.461813	0.460901	8.35931	0.344473	0.725769	0.462845	0.461813	0.139201
4F2_MOUSE|P10852_K40_K42	KO_Late-KO_Uninfected	1.87827	0.460901	8.35931	0.00324317	0.0528307	2.48903	1.87827	1.27711
4F2_MOUSE|P10852_K40_K42	WT_Early-Wt_Uninfected	-0.346368	0.564486	8.35931	0.555806	0.786171	0.255077	0.346368	0.104483
4F2_MOUSE|P10852_K40_K42	WT_Late-Wt_Uninfected	1.14295	0.564486	8.35931	0.0759622	0.270068	1.1194	1.14295	0.568526
4F2_MOUSE|P10852_K40_K42	Infected-Uninfected	0.553261	0.325906	8.35931	0.126391	0.319113	0.898285	0.553261	0.496056
4F2_MOUSE|P10852_K40_K42	KO-WT	0.422004	0.287422	8.35931	0.178634	0.271145	0.748035	0.422004	0.566799
4F2_MOUSE|P10852_K40_K42	Early-Uninfected	-0.404091	0.364374	8.35931	0.298314	0.583957	0.525326	0.404091	0.233619
4F2_MOUSE|P10852_K40_K42	Late-Uninfected	1.51061	0.364374	8.35931	0.0029337	0.0256561	2.53258	1.51061	1.59081
4F2_MOUSE|P10852_K42	KO_Early-WT_Early	0.11427	0.249811	19.3593	0.652456	0.779803	0.185449	0.11427	0.108015
4F2_MOUSE|P10852_K42	KO_Late-WT_Late	0.0346075	0.249811	19.3593	0.891248	0.944903	0.0500012	0.0346075	0.024613
4F2_MOUSE|P10852_K42	KO_Uninfected-WT_Uninfected	-0.361591	0.288456	19.3593	0.224939	0.429352	0.647936	0.361591	0.367187
4F2_MOUSE|P10852_K42	KO_Early-KO_Uninfected	0.282595	0.269826	19.3593	0.307852	0.699536	0.511658	0.282595	0.15519
4F2_MOUSE|P10852_K42	KO_Late-KO_Uninfected	1.78633	0.269826	19.3593	2.24331e-06	0.000226136	5.64911	1.78633	3.64563
4F2_MOUSE|P10852_K42	WT_Early-Wt_Uninfected	-0.193266	0.269826	19.3593	0.482383	0.735653	0.316608	0.193266	0.133327
4F2_MOUSE|P10852_K42	WT_Late-Wt_Uninfected	1.39013	0.269826	19.3593	5.35441e-05	0.00214827	4.27129	1.39013	2.66791
4F2_MOUSE|P10852_K42	Infected-Uninfected	0.816447	0.169123	19.3593	0.000111366	0.00246111	3.95325	0.816447	2.60887
4F2_MOUSE|P10852_K42	KO-WT	-0.0709043	0.15203	19.3593	0.646146	0.73563	0.189669	0.0709043	0.133341
4F2_MOUSE|P10852_K42	Early-Uninfected	0.0446646	0.190796	19.3593	0.817368	0.924544	0.0875822	0.0446646	0.0340726
4F2_MOUSE|P10852_K42	Late-Uninfected	1.58823	0.190796	19.3593	8.02712e-08	7.26845e-06	7.09544	1.58823	5.13856
4F2_MOUSE|P10852_K53	KO_Early-WT_Early	0.609175	0.28993	19.3593	0.0489478	0.148075	1.31027	0.609175	0.829519
4F2_MOUSE|P10852_K53	KO_Late-WT_Late	0.530533	0.28993	19.3593	0.0827137	0.22998	1.08242	0.530533	0.63831
4F2_MOUSE|P10852_K53	KO_Uninfected-WT_Uninfected	-0.0651995	0.334783	19.3593	0.847617	0.924434	0.0718006	0.0651995	0.0341239
4F2_MOUSE|P10852_K53	KO_Early-KO_Uninfected	0.240258	0.313161	19.3593	0.452215	0.79612	0.344655	0.240258	0.0990213
4F2_MOUSE|P10852_K53	KO_Late-KO_Uninfected	1.20051	0.313161	19.3593	0.00108954	0.0241778	2.96276	1.20051	1.61658
4F2_MOUSE|P10852_K53	WT_Early-Wt_Uninfected	-0.434116	0.313161	19.3593	0.181434	0.457836	0.741282	0.434116	0.33929
4F2_MOUSE|P10852_K53	WT_Late-Wt_Uninfected	0.604776	0.313161	19.3593	0.0682333	0.254037	1.166	0.604776	0.595102
4F2_MOUSE|P10852_K53	Infected-Uninfected	0.402857	0.196284	19.3593	0.0538985	0.188996	1.26842	0.402857	0.723548
4F2_MOUSE|P10852_K53	KO-WT	0.358169	0.176446	19.3593	0.0563365	0.109484	1.24921	0.358169	0.960648
4F2_MOUSE|P10852_K53	Early-Uninfected	-0.0969285	0.221438	19.3593	0.666432	0.853412	0.176244	0.0969285	0.0688413
4F2_MOUSE|P10852_K53	Late-Uninfected	0.902642	0.221438	19.3593	0.00062287	0.00810578	3.2056	0.902642	2.0912
4F2_MOUSE|P10852_K59	KO_Early-WT_Early	0.285676	0.172637	19.3593	0.114093	0.253572	0.942741	0.285676	0.595899
4F2_MOUSE|P10852_K59	KO_Late-WT_Late	0.253955	0.172637	19.3593	0.157351	0.340384	0.80313	0.253955	0.468031
4F2_MOUSE|P10852_K59	KO_Uninfected-WT_Uninfected	0.169413	0.199345	19.3593	0.405797	0.604734	0.391691	0.169413	0.218435
4F2_MOUSE|P10852_K59	KO_Early-KO_Uninfected	0.0648228	0.18647	19.3593	0.731868	0.922769	0.135567	0.0648228	0.0349071
4F2_MOUSE|P10852_K59	KO_Late-KO_Uninfected	0.741967	0.18647	19.3593	0.000779301	0.0185833	3.10829	0.741967	1.73088
4F2_MOUSE|P10852_K59	WT_Early-Wt_Uninfected	-0.05144	0.18647	19.3593	0.785577	0.912101	0.104811	0.05144	0.0399571
4F2_MOUSE|P10852_K59	WT_Late-Wt_Uninfected	0.657425	0.18647	19.3593	0.00220931	0.0301379	2.65574	0.657425	1.52089
4F2_MOUSE|P10852_K59	Infected-Uninfected	0.353194	0.116876	19.3593	0.0069085	0.0495707	2.16062	0.353194	1.30478
4F2_MOUSE|P10852_K59	KO-WT	0.236348	0.105064	19.3593	0.0362918	0.0777507	1.44019	0.236348	1.1093
4F2_MOUSE|P10852_K59	Early-Uninfected	0.00669141	0.131854	19.3593	0.960046	0.984783	0.017708	0.00669141	0.00665932
4F2_MOUSE|P10852_K59	Late-Uninfected	0.699696	0.131854	19.3593	3.78924e-05	0.000952617	4.42145	0.699696	3.02108
5NT3A_MOUSE|Q9D020_K162	KO_Early-WT_Early	0.698476	0.185358	8.35931	0.00505894	0.0349716	2.29594	0.698476	1.45628
5NT3A_MOUSE|Q9D020_K162	KO_Late-WT_Late	0.591112	0.185358	8.35931	0.0121127	0.0730332	1.91676	0.591112	1.13648
5NT3A_MOUSE|Q9D020_K162	KO_Uninfected-WT_Uninfected	0.247536	0.227016	8.35931	0.305971	0.514682	0.514319	0.247536	0.288461
5NT3A_MOUSE|Q9D020_K162	KO_Early-KO_Uninfected	0.0429886	0.185358	8.35931	0.822176	0.948464	0.0850354	0.0429886	0.0229789
5NT3A_MOUSE|Q9D020_K162	KO_Late-KO_Uninfected	1.36003	0.185358	8.35931	6.45613e-05	0.00279857	4.19003	1.36003	2.55306
5NT3A_MOUSE|Q9D020_K162	WT_Early-Wt_Uninfected	-0.407951	0.227016	8.35931	0.108445	0.351832	0.96479	0.407951	0.453665
5NT3A_MOUSE|Q9D020_K162	WT_Late-Wt_Uninfected	1.01645	0.227016	8.35931	0.0018488	0.0269829	2.73311	1.01645	1.56891
5NT3A_MOUSE|Q9D020_K162	Infected-Uninfected	0.502881	0.131068	8.35931	0.00457555	0.0376239	2.33956	0.502881	1.42454
5NT3A_MOUSE|Q9D020_K162	KO-WT	0.512375	0.115591	8.35931	0.00196592	0.00851982	2.70643	0.512375	2.06957
5NT3A_MOUSE|Q9D020_K162	Early-Uninfected	-0.182481	0.146538	8.35931	0.246803	0.530694	0.607649	0.182481	0.275156
5NT3A_MOUSE|Q9D020_K162	Late-Uninfected	1.18824	0.146538	8.35931	3.07301e-05	0.000810389	4.51244	1.18824	3.09131
5NTC_MOUSE|Q3V1L4_K21	KO_Early-WT_Early	-0.802274	0.162379	8.35931	0.000996594	0.0126503	3.00148	0.802274	1.8979
5NTC_MOUSE|Q3V1L4_K21	KO_Late-WT_Late	-1.01241	0.162379	8.35931	0.000208034	0.00669939	3.68187	1.01241	2.17396
5NTC_MOUSE|Q3V1L4_K21	KO_Uninfected-WT_Uninfected	-0.343361	0.198873	8.35931	0.120903	0.301492	0.917562	0.343361	0.520725
5NTC_MOUSE|Q3V1L4_K21	KO_Early-KO_Uninfected	-0.354586	0.162379	8.35931	0.0590858	0.356301	1.22852	0.354586	0.448182
5NTC_MOUSE|Q3V1L4_K21	KO_Late-KO_Uninfected	-0.617394	0.162379	8.35931	0.00481328	0.0694497	2.31756	0.617394	1.15833
5NTC_MOUSE|Q3V1L4_K21	WT_Early-Wt_Uninfected	0.104328	0.198873	8.35931	0.613489	0.823405	0.212193	0.104328	0.0843865
5NTC_MOUSE|Q3V1L4_K21	WT_Late-Wt_Uninfected	0.0516523	0.198873	8.35931	0.801359	0.916363	0.0961731	0.0516523	0.0379325
5NTC_MOUSE|Q3V1L4_K21	Infected-Uninfected	-0.204	0.114819	8.35931	0.111906	0.294351	0.951145	0.204	0.531134
5NTC_MOUSE|Q3V1L4_K21	KO-WT	-0.719347	0.101261	8.35931	8.17825e-05	0.000853876	4.08734	0.719347	3.06861
5NTC_MOUSE|Q3V1L4_K21	Early-Uninfected	-0.125129	0.128372	8.35931	0.357051	0.636076	0.44727	0.125129	0.196491
5NTC_MOUSE|Q3V1L4_K21	Late-Uninfected	-0.282871	0.128372	8.35931	0.0572561	0.192395	1.24218	0.282871	0.715805
5NTC_MOUSE|Q3V1L4_K217	KO_Early-WT_Early	1.11226	0.246992	8.35931	0.00178482	0.0185245	2.74841	1.11226	1.73225
5NTC_MOUSE|Q3V1L4_K217	KO_Late-WT_Late	0.927277	0.246992	8.35931	0.00516398	0.0455498	2.28702	0.927277	1.34151
5NTC_MOUSE|Q3V1L4_K217	KO_Uninfected-WT_Uninfected	0.681713	0.302502	8.35931	0.0528826	0.188304	1.27669	0.681713	0.725139
5NTC_MOUSE|Q3V1L4_K217	KO_Early-KO_Uninfected	0.346201	0.246992	8.35931	0.197034	0.591707	0.705459	0.346201	0.227894
5NTC_MOUSE|Q3V1L4_K217	KO_Late-KO_Uninfected	0.202486	0.246992	8.35931	0.435075	0.735794	0.361436	0.202486	0.133244
5NTC_MOUSE|Q3V1L4_K217	WT_Early-Wt_Uninfected	-0.0843495	0.302502	8.35931	0.787142	0.912357	0.103947	0.0843495	0.0398351
5NTC_MOUSE|Q3V1L4_K217	WT_Late-Wt_Uninfected	-0.0430779	0.302502	8.35931	0.890133	0.955307	0.0505453	0.0430779	0.0198568
5NTC_MOUSE|Q3V1L4_K217	Infected-Uninfected	0.105315	0.174649	8.35931	0.562504	0.755221	0.249875	0.105315	0.121926
5NTC_MOUSE|Q3V1L4_K217	KO-WT	0.907084	0.154026	8.35931	0.000309311	0.00222252	3.50961	0.907084	2.65315
5NTC_MOUSE|Q3V1L4_K217	Early-Uninfected	0.130926	0.195264	8.35931	0.520627	0.764867	0.283473	0.130926	0.116414
5NTC_MOUSE|Q3V1L4_K217	Late-Uninfected	0.0797041	0.195264	8.35931	0.693393	0.834093	0.159021	0.0797041	0.0787854
5NTC_MOUSE|Q3V1L4_K224	KO_Early-WT_Early	-0.0184463	0.232565	8.35931	0.938647	0.966613	0.0274978	0.0184463	0.0147474
5NTC_MOUSE|Q3V1L4_K224	KO_Late-WT_Late	-0.262317	0.232565	8.35931	0.290679	0.498507	0.536586	0.262317	0.302328
5NTC_MOUSE|Q3V1L4_K224	KO_Uninfected-WT_Uninfected	-0.484356	0.284833	8.35931	0.125833	0.308078	0.900205	0.484356	0.51134
5NTC_MOUSE|Q3V1L4_K224	KO_Early-KO_Uninfected	0.427504	0.232565	8.35931	0.101729	0.452234	0.992553	0.427504	0.344637
5NTC_MOUSE|Q3V1L4_K224	KO_Late-KO_Uninfected	0.101988	0.232565	8.35931	0.67211	0.876152	0.17256	0.101988	0.0574204
5NTC_MOUSE|Q3V1L4_K224	WT_Early-Wt_Uninfected	-0.0384059	0.284833	8.35931	0.895931	0.962018	0.0477253	0.0384059	0.0168167
5NTC_MOUSE|Q3V1L4_K224	WT_Late-Wt_Uninfected	-0.12005	0.284833	8.35931	0.684037	0.85076	0.16492	0.12005	0.070193
5NTC_MOUSE|Q3V1L4_K224	Infected-Uninfected	0.0927591	0.164448	8.35931	0.587522	0.771682	0.230976	0.0927591	0.112562
5NTC_MOUSE|Q3V1L4_K224	KO-WT	-0.25504	0.14503	8.35931	0.115089	0.192303	0.938965	0.25504	0.716014
5NTC_MOUSE|Q3V1L4_K224	Early-Uninfected	0.194549	0.183859	8.35931	0.319606	0.602523	0.495384	0.194549	0.220026
5NTC_MOUSE|Q3V1L4_K224	Late-Uninfected	-0.00903079	0.183859	8.35931	0.961979	0.98145	0.0168346	0.00903079	0.00813171
5NTC_MOUSE|Q3V1L4_K292	KO_Early-WT_Early	0.301774	0.256057	8.35931	0.271038	0.444746	0.56697	0.301774	0.351888
5NTC_MOUSE|Q3V1L4_K292	KO_Late-WT_Late	0.691193	0.256057	8.35931	0.0260529	0.114692	1.58414	0.691193	0.940465
5NTC_MOUSE|Q3V1L4_K292	KO_Uninfected-WT_Uninfected	0.507626	0.313604	8.35931	0.142551	0.331868	0.846029	0.507626	0.479035
5NTC_MOUSE|Q3V1L4_K292	KO_Early-KO_Uninfected	0.218463	0.256057	8.35931	0.417335	0.77518	0.379516	0.218463	0.110598
5NTC_MOUSE|Q3V1L4_K292	KO_Late-KO_Uninfected	0.386889	0.256057	8.35931	0.167641	0.484721	0.77562	0.386889	0.314508
5NTC_MOUSE|Q3V1L4_K292	WT_Early-Wt_Uninfected	0.424315	0.313604	8.35931	0.211501	0.492635	0.674688	0.424315	0.307475
5NTC_MOUSE|Q3V1L4_K292	WT_Late-Wt_Uninfected	0.203323	0.313604	8.35931	0.534165	0.760195	0.272325	0.203323	0.119075
5NTC_MOUSE|Q3V1L4_K292	Infected-Uninfected	0.308247	0.181059	8.35931	0.125454	0.317654	0.901517	0.308247	0.498045
5NTC_MOUSE|Q3V1L4_K292	KO-WT	0.500197	0.159679	8.35931	0.0132179	0.0356755	1.87884	0.500197	1.44763
5NTC_MOUSE|Q3V1L4_K292	Early-Uninfected	0.321389	0.202431	8.35931	0.149406	0.411571	0.825631	0.321389	0.385555
5NTC_MOUSE|Q3V1L4_K292	Late-Uninfected	0.295106	0.202431	8.35931	0.181412	0.39042	0.741334	0.295106	0.408468
68MP_MOUSE|P56379_K49	KO_Early-WT_Early	0.816623	0.284346	8.35931	0.0198467	0.0817111	1.70231	0.816623	1.08772
68MP_MOUSE|P56379_K49	KO_Late-WT_Late	0.826124	0.284346	8.35931	0.0188326	0.0938229	1.72509	0.826124	1.02769
68MP_MOUSE|P56379_K49	KO_Uninfected-WT_Uninfected	0.926423	0.348251	8.35931	0.0277187	0.133667	1.55723	0.926423	0.873977
68MP_MOUSE|P56379_K49	KO_Early-KO_Uninfected	-0.0562966	0.284346	8.35931	0.847786	0.957855	0.0717138	0.0562966	0.0187003
68MP_MOUSE|P56379_K49	KO_Late-KO_Uninfected	0.108205	0.284346	8.35931	0.713032	0.896328	0.146891	0.108205	0.0475332
68MP_MOUSE|P56379_K49	WT_Early-Wt_Uninfected	0.0535033	0.348251	8.35931	0.881542	0.954608	0.0547568	0.0535033	0.020175
68MP_MOUSE|P56379_K49	WT_Late-Wt_Uninfected	0.208504	0.348251	8.35931	0.565229	0.78119	0.247775	0.208504	0.107244
68MP_MOUSE|P56379_K49	Infected-Uninfected	0.0784789	0.201063	8.35931	0.706058	0.844375	0.15116	0.0784789	0.0734644
68MP_MOUSE|P56379_K49	KO-WT	0.85639	0.177321	8.35931	0.00115254	0.00581638	2.93834	0.85639	2.23535
68MP_MOUSE|P56379_K49	Early-Uninfected	-0.00139667	0.224795	8.35931	0.995188	0.997751	0.00209468	0.00139667	0.000977871
68MP_MOUSE|P56379_K49	Late-Uninfected	0.158355	0.224795	8.35931	0.50031	0.701449	0.30076	0.158355	0.154004
6PGD_MOUSE|Q9DCD0_K248	KO_Early-WT_Early	0.300888	0.09182	19.3593	0.00389297	0.0298128	2.40972	0.300888	1.5256
6PGD_MOUSE|Q9DCD0_K248	KO_Late-WT_Late	0.160211	0.09182	19.3593	0.0968685	0.252124	1.01382	0.160211	0.598386
6PGD_MOUSE|Q9DCD0_K248	KO_Uninfected-WT_Uninfected	0.132564	0.106025	19.3593	0.226088	0.430823	0.645722	0.132564	0.365701
6PGD_MOUSE|Q9DCD0_K248	KO_Early-KO_Uninfected	0.102556	0.099177	19.3593	0.313847	0.704525	0.503281	0.102556	0.152103
6PGD_MOUSE|Q9DCD0_K248	KO_Late-KO_Uninfected	-0.103763	0.099177	19.3593	0.308337	0.636844	0.510974	0.103763	0.195967
6PGD_MOUSE|Q9DCD0_K248	WT_Early-Wt_Uninfected	-0.0657677	0.099177	19.3593	0.515064	0.759018	0.288139	0.0657677	0.119748
6PGD_MOUSE|Q9DCD0_K248	WT_Late-Wt_Uninfected	-0.13141	0.099177	19.3593	0.200596	0.458373	0.697677	0.13141	0.338781
6PGD_MOUSE|Q9DCD0_K248	Infected-Uninfected	-0.0495962	0.0621625	19.3593	0.434637	0.652179	0.361873	0.0495962	0.185634
6PGD_MOUSE|Q9DCD0_K248	KO-WT	0.197888	0.0558799	19.3593	0.00213153	0.00905347	2.67131	0.197888	2.04318
6PGD_MOUSE|Q9DCD0_K248	Early-Uninfected	0.0183943	0.0701287	19.3593	0.795866	0.914549	0.09916	0.0183943	0.038793
6PGD_MOUSE|Q9DCD0_K248	Late-Uninfected	-0.117587	0.0701287	19.3593	0.10967	0.290636	0.959911	0.117587	0.536651
6PGD_MOUSE|Q9DCD0_K253	KO_Early-WT_Early	1.39738	0.232173	19.3593	7.97394e-06	0.000540274	5.09833	1.39738	3.26739
6PGD_MOUSE|Q9DCD0_K253	KO_Late-WT_Late	1.18062	0.232173	19.3593	6.22214e-05	0.00318325	4.20606	1.18062	2.49713
6PGD_MOUSE|Q9DCD0_K253	KO_Uninfected-WT_Uninfected	1.17404	0.26809	19.3593	0.000310176	0.00914349	3.50839	1.17404	2.03889
6PGD_MOUSE|Q9DCD0_K253	KO_Early-KO_Uninfected	0.0736438	0.250775	19.3593	0.772139	0.935886	0.112304	0.0736438	0.0287768
6PGD_MOUSE|Q9DCD0_K253	KO_Late-KO_Uninfected	-0.0689045	0.250775	19.3593	0.786407	0.926567	0.104353	0.0689045	0.033123
6PGD_MOUSE|Q9DCD0_K253	WT_Early-Wt_Uninfected	-0.149698	0.250775	19.3593	0.557463	0.786882	0.253784	0.149698	0.10409
6PGD_MOUSE|Q9DCD0_K253	WT_Late-Wt_Uninfected	-0.0754835	0.250775	19.3593	0.766623	0.895458	0.115418	0.0754835	0.0479548
6PGD_MOUSE|Q9DCD0_K253	Infected-Uninfected	-0.0551107	0.157182	19.3593	0.729661	0.857739	0.136879	0.0551107	0.066645
6PGD_MOUSE|Q9DCD0_K253	KO-WT	1.25068	0.141296	19.3593	3.09558e-08	2.16313e-06	7.50926	1.25068	5.66492
6PGD_MOUSE|Q9DCD0_K253	Early-Uninfected	-0.0380273	0.177325	19.3593	0.832439	0.933833	0.0796477	0.0380273	0.0297307
6PGD_MOUSE|Q9DCD0_K253	Late-Uninfected	-0.072194	0.177325	19.3593	0.68838	0.831559	0.162172	0.072194	0.0801067
6PGD_MOUSE|Q9DCD0_K261	KO_Early-WT_Early	0.79536	0.234103	19.3593	0.00296027	0.0251341	2.52867	0.79536	1.59974
6PGD_MOUSE|Q9DCD0_K261	KO_Late-WT_Late	0.870469	0.234103	19.3593	0.00142013	0.0206065	2.84767	0.870469	1.686
6PGD_MOUSE|Q9DCD0_K261	KO_Uninfected-WT_Uninfected	0.67793	0.270319	19.3593	0.0211944	0.114405	1.67378	0.67793	0.941555
6PGD_MOUSE|Q9DCD0_K261	KO_Early-KO_Uninfected	-0.0327875	0.25286	19.3593	0.898168	0.973959	0.0466425	0.0327875	0.0114592
6PGD_MOUSE|Q9DCD0_K261	KO_Late-KO_Uninfected	-0.337006	0.25286	19.3593	0.198079	0.527696	0.703161	0.337006	0.277617
6PGD_MOUSE|Q9DCD0_K261	WT_Early-Wt_Uninfected	-0.150218	0.25286	19.3593	0.559341	0.788655	0.252323	0.150218	0.103113
6PGD_MOUSE|Q9DCD0_K261	WT_Late-Wt_Uninfected	-0.529545	0.25286	19.3593	0.0496216	0.212892	1.30433	0.529545	0.671841
6PGD_MOUSE|Q9DCD0_K261	Infected-Uninfected	-0.262389	0.158488	19.3593	0.113929	0.29805	0.943366	0.262389	0.52571
6PGD_MOUSE|Q9DCD0_K261	KO-WT	0.781253	0.14247	19.3593	2.55845e-05	0.000352804	4.59202	0.781253	3.45247
6PGD_MOUSE|Q9DCD0_K261	Early-Uninfected	-0.0915026	0.178799	19.3593	0.614605	0.824767	0.211404	0.0915026	0.0836685
6PGD_MOUSE|Q9DCD0_K261	Late-Uninfected	-0.433276	0.178799	19.3593	0.0253347	0.115211	1.59628	0.433276	0.938506
6PGD_MOUSE|Q9DCD0_K294	KO_Early-WT_Early	0.895873	0.237464	8.35931	0.00502623	0.034769	2.29876	0.895873	1.45881
6PGD_MOUSE|Q9DCD0_K294	KO_Late-WT_Late	0.877368	0.237464	8.35931	0.00563831	0.0481266	2.24885	0.877368	1.31761
6PGD_MOUSE|Q9DCD0_K294	KO_Uninfected-WT_Uninfected	1.21666	0.290833	8.35931	0.00278184	0.0354364	2.55567	1.21666	1.45055
6PGD_MOUSE|Q9DCD0_K294	KO_Early-KO_Uninfected	-0.00951108	0.237464	8.35931	0.968991	0.991346	0.0136801	0.00951108	0.00377461
6PGD_MOUSE|Q9DCD0_K294	KO_Late-KO_Uninfected	-0.254859	0.237464	8.35931	0.313161	0.642269	0.504233	0.254859	0.192283
6PGD_MOUSE|Q9DCD0_K294	WT_Early-Wt_Uninfected	0.311278	0.290833	8.35931	0.314412	0.597503	0.502501	0.311278	0.22366
6PGD_MOUSE|Q9DCD0_K294	WT_Late-Wt_Uninfected	0.0844361	0.290833	8.35931	0.77864	0.903573	0.108663	0.0844361	0.0440368
6PGD_MOUSE|Q9DCD0_K294	Infected-Uninfected	0.0328362	0.167912	8.35931	0.849628	0.928092	0.070771	0.0328362	0.0324088
6PGD_MOUSE|Q9DCD0_K294	KO-WT	0.996635	0.148085	8.35931	0.000120893	0.00113172	3.9176	0.996635	2.94626
6PGD_MOUSE|Q9DCD0_K294	Early-Uninfected	0.150884	0.187732	8.35931	0.443812	0.70733	0.352801	0.150884	0.150378
6PGD_MOUSE|Q9DCD0_K294	Late-Uninfected	-0.0852113	0.187732	8.35931	0.661455	0.814539	0.1795	0.0852113	0.089088
6PGD_MOUSE|Q9DCD0_K303	KO_Early-WT_Early	1.17956	0.190932	19.3593	5.67509e-06	0.000423809	5.24603	1.17956	3.37283
6PGD_MOUSE|Q9DCD0_K303	KO_Late-WT_Late	0.854649	0.190932	19.3593	0.000248324	0.00751731	3.60498	0.854649	2.12394
6PGD_MOUSE|Q9DCD0_K303	KO_Uninfected-WT_Uninfected	0.940966	0.220469	19.3593	0.000400565	0.0108973	3.39733	0.940966	1.96268
6PGD_MOUSE|Q9DCD0_K303	KO_Early-KO_Uninfected	0.0537311	0.20623	19.3593	0.797199	0.940936	0.0984334	0.0537311	0.0264399
6PGD_MOUSE|Q9DCD0_K303	KO_Late-KO_Uninfected	-0.355027	0.20623	19.3593	0.1011	0.378431	0.995249	0.355027	0.422013
6PGD_MOUSE|Q9DCD0_K303	WT_Early-Wt_Uninfected	-0.184859	0.20623	19.3593	0.381066	0.662302	0.418999	0.184859	0.178944
6PGD_MOUSE|Q9DCD0_K303	WT_Late-Wt_Uninfected	-0.26871	0.20623	19.3593	0.207873	0.46711	0.682201	0.26871	0.330581
6PGD_MOUSE|Q9DCD0_K303	Infected-Uninfected	-0.188716	0.129262	19.3593	0.16034	0.366347	0.794957	0.188716	0.436108
6PGD_MOUSE|Q9DCD0_K303	KO-WT	0.991723	0.116197	19.3593	5.46305e-08	3.43194e-06	7.26256	0.991723	5.46446
6PGD_MOUSE|Q9DCD0_K303	Early-Uninfected	-0.0655637	0.145827	19.3593	0.657992	0.848918	0.181779	0.0655637	0.0711345
6PGD_MOUSE|Q9DCD0_K303	Late-Uninfected	-0.311869	0.145827	19.3593	0.0454175	0.167134	1.34278	0.311869	0.776935
6PGD_MOUSE|Q9DCD0_K308	KO_Early-WT_Early	0.590217	0.196706	19.3593	0.00724695	0.0431326	2.13984	0.590217	1.36519
6PGD_MOUSE|Q9DCD0_K308	KO_Late-WT_Late	0.544839	0.196706	19.3593	0.0120576	0.0728992	1.91874	0.544839	1.13728
6PGD_MOUSE|Q9DCD0_K308	KO_Uninfected-WT_Uninfected	0.102281	0.227137	19.3593	0.657493	0.80094	0.182109	0.102281	0.0963998
6PGD_MOUSE|Q9DCD0_K308	KO_Early-KO_Uninfected	0.214503	0.212467	19.3593	0.325147	0.713107	0.48792	0.214503	0.146845
6PGD_MOUSE|Q9DCD0_K308	KO_Late-KO_Uninfected	0.171537	0.212467	19.3593	0.42927	0.731335	0.36727	0.171537	0.135884
6PGD_MOUSE|Q9DCD0_K308	WT_Early-Wt_Uninfected	-0.273433	0.212467	19.3593	0.21329	0.494887	0.671029	0.273433	0.305494
6PGD_MOUSE|Q9DCD0_K308	WT_Late-Wt_Uninfected	-0.271021	0.212467	19.3593	0.217194	0.477374	0.663151	0.271021	0.321141
6PGD_MOUSE|Q9DCD0_K308	Infected-Uninfected	-0.0396035	0.133171	19.3593	0.769338	0.881113	0.113883	0.0396035	0.0549685
6PGD_MOUSE|Q9DCD0_K308	KO-WT	0.412445	0.119712	19.3593	0.00265436	0.0106257	2.57604	0.412445	1.97364
6PGD_MOUSE|Q9DCD0_K308	Early-Uninfected	-0.0294647	0.150237	19.3593	0.846559	0.9401	0.0723428	0.0294647	0.0268258
6PGD_MOUSE|Q9DCD0_K308	Late-Uninfected	-0.0497422	0.150237	19.3593	0.744132	0.865223	0.12835	0.0497422	0.0628721
6PGD_MOUSE|Q9DCD0_K316	KO_Early-WT_Early	0.626616	0.207608	19.3593	0.00696563	0.0419978	2.15704	0.626616	1.37677
6PGD_MOUSE|Q9DCD0_K316	KO_Late-WT_Late	0.800813	0.207608	19.3593	0.00103144	0.0174454	2.98656	0.800813	1.75832
6PGD_MOUSE|Q9DCD0_K316	KO_Uninfected-WT_Uninfected	0.612663	0.239726	19.3593	0.019146	0.107844	1.71792	0.612663	0.967204
6PGD_MOUSE|Q9DCD0_K316	KO_Early-KO_Uninfected	0.0259066	0.224243	19.3593	0.909216	0.975376	0.0413331	0.0259066	0.0108278
6PGD_MOUSE|Q9DCD0_K316	KO_Late-KO_Uninfected	-0.145338	0.224243	19.3593	0.524515	0.792583	0.280242	0.145338	0.100955
6PGD_MOUSE|Q9DCD0_K316	WT_Early-Wt_Uninfected	0.0119532	0.224243	19.3593	0.958035	0.985094	0.0186184	0.0119532	0.00652222
6PGD_MOUSE|Q9DCD0_K316	WT_Late-Wt_Uninfected	-0.333488	0.224243	19.3593	0.153075	0.396934	0.815095	0.333488	0.401282
6PGD_MOUSE|Q9DCD0_K316	Infected-Uninfected	-0.110242	0.140552	19.3593	0.442327	0.659043	0.354256	0.110242	0.181086
6PGD_MOUSE|Q9DCD0_K316	KO-WT	0.680031	0.126346	19.3593	3.20229e-05	0.000416868	4.49454	0.680031	3.38
6PGD_MOUSE|Q9DCD0_K316	Early-Uninfected	0.0189299	0.158564	19.3593	0.906202	0.962357	0.0427751	0.0189299	0.0166637
6PGD_MOUSE|Q9DCD0_K316	Late-Uninfected	-0.239413	0.158564	19.3593	0.147222	0.347231	0.832028	0.239413	0.459382
6PGD_MOUSE|Q9DCD0_K317	KO_Early-WT_Early	0.61836	0.158383	19.3593	0.000925889	0.0120826	3.03344	0.61836	1.91784
6PGD_MOUSE|Q9DCD0_K317	KO_Late-WT_Late	0.39848	0.158383	19.3593	0.0208363	0.0996715	1.68118	0.39848	1.00143
6PGD_MOUSE|Q9DCD0_K317	KO_Uninfected-WT_Uninfected	0.40471	0.182885	19.3593	0.0391013	0.159222	1.40781	0.40471	0.797996
6PGD_MOUSE|Q9DCD0_K317	KO_Early-KO_Uninfected	0.391029	0.171073	19.3593	0.0337011	0.276004	1.47236	0.391029	0.559085
6PGD_MOUSE|Q9DCD0_K317	KO_Late-KO_Uninfected	0.191336	0.171073	19.3593	0.277063	0.612911	0.557421	0.191336	0.212603
6PGD_MOUSE|Q9DCD0_K317	WT_Early-Wt_Uninfected	0.17738	0.171073	19.3593	0.312578	0.595914	0.505042	0.17738	0.224817
6PGD_MOUSE|Q9DCD0_K317	WT_Late-Wt_Uninfected	0.197567	0.171073	19.3593	0.262201	0.527651	0.581366	0.197567	0.277653
6PGD_MOUSE|Q9DCD0_K317	Infected-Uninfected	0.239328	0.107226	19.3593	0.0376146	0.152763	1.42464	0.239328	0.815983
6PGD_MOUSE|Q9DCD0_K317	KO-WT	0.47385	0.0963889	19.3593	9.11235e-05	0.000929587	4.04037	0.47385	3.03171
6PGD_MOUSE|Q9DCD0_K317	Early-Uninfected	0.284204	0.120967	19.3593	0.0295503	0.163775	1.52944	0.284204	0.785752
6PGD_MOUSE|Q9DCD0_K317	Late-Uninfected	0.194452	0.120967	19.3593	0.124137	0.314011	0.906097	0.194452	0.503055
6PGD_MOUSE|Q9DCD0_K325	KO_Early-WT_Early	0.886727	0.309365	19.3593	0.00975743	0.0525412	2.01066	0.886727	1.2795
6PGD_MOUSE|Q9DCD0_K325	KO_Late-WT_Late	0.686357	0.309365	19.3593	0.0386535	0.145629	1.41281	0.686357	0.836754
6PGD_MOUSE|Q9DCD0_K325	KO_Uninfected-WT_Uninfected	0.85666	0.357224	19.3593	0.026704	0.131136	1.57342	0.85666	0.88228
6PGD_MOUSE|Q9DCD0_K325	KO_Early-KO_Uninfected	0.42368	0.334153	19.3593	0.219863	0.614476	0.657847	0.42368	0.211495
6PGD_MOUSE|Q9DCD0_K325	KO_Late-KO_Uninfected	0.274275	0.334153	19.3593	0.421749	0.727325	0.374946	0.274275	0.138271
6PGD_MOUSE|Q9DCD0_K325	WT_Early-Wt_Uninfected	0.393613	0.334153	19.3593	0.253097	0.539531	0.596712	0.393613	0.267984
6PGD_MOUSE|Q9DCD0_K325	WT_Late-Wt_Uninfected	0.444578	0.334153	19.3593	0.198827	0.456405	0.701525	0.444578	0.34065
6PGD_MOUSE|Q9DCD0_K325	Infected-Uninfected	0.384036	0.209441	19.3593	0.0821317	0.24401	1.08549	0.384036	0.612592
6PGD_MOUSE|Q9DCD0_K325	KO-WT	0.809915	0.188274	19.3593	0.000370625	0.00254342	3.43107	0.809915	2.59458
6PGD_MOUSE|Q9DCD0_K325	Early-Uninfected	0.408646	0.236282	19.3593	0.0996353	0.329999	1.00159	0.408646	0.481487
6PGD_MOUSE|Q9DCD0_K325	Late-Uninfected	0.359426	0.236282	19.3593	0.144382	0.343961	0.840488	0.359426	0.463491
6PGD_MOUSE|Q9DCD0_K377	KO_Early-WT_Early	1.46828	0.180162	19.3593	1.10895e-07	2.6967e-05	6.95509	1.46828	4.56917
6PGD_MOUSE|Q9DCD0_K377	KO_Late-WT_Late	1.33545	0.180162	19.3593	4.54323e-07	0.000129129	6.34264	1.33545	3.88898
6PGD_MOUSE|Q9DCD0_K377	KO_Uninfected-WT_Uninfected	1.35207	0.208033	19.3593	2.88413e-06	0.000460965	5.53999	1.35207	3.33633
6PGD_MOUSE|Q9DCD0_K377	KO_Early-KO_Uninfected	0.181259	0.194597	19.3593	0.363086	0.736113	0.43999	0.181259	0.133056
6PGD_MOUSE|Q9DCD0_K377	KO_Late-KO_Uninfected	0.0739431	0.194597	19.3593	0.708096	0.894096	0.149908	0.0739431	0.0486157
6PGD_MOUSE|Q9DCD0_K377	WT_Early-Wt_Uninfected	0.0650516	0.194597	19.3593	0.741756	0.892742	0.129739	0.0650516	0.049274
6PGD_MOUSE|Q9DCD0_K377	WT_Late-Wt_Uninfected	0.0905586	0.194597	19.3593	0.646862	0.829955	0.189188	0.0905586	0.0809452
6PGD_MOUSE|Q9DCD0_K377	Infected-Uninfected	0.102703	0.12197	19.3593	0.41005	0.631427	0.387164	0.102703	0.199677
6PGD_MOUSE|Q9DCD0_K377	KO-WT	1.38527	0.109643	19.3593	8.42266e-11	2.40891e-08	10.0746	1.38527	7.61818
6PGD_MOUSE|Q9DCD0_K377	Early-Uninfected	0.123156	0.137601	19.3593	0.381769	0.659778	0.418199	0.123156	0.180602
6PGD_MOUSE|Q9DCD0_K377	Late-Uninfected	0.0822509	0.137601	19.3593	0.556935	0.741877	0.254195	0.0822509	0.129668
6PGD_MOUSE|Q9DCD0_K38	KO_Early-WT_Early	1.4394	0.219255	19.3593	2.5159e-06	0.000229823	5.59931	1.4394	3.63861
6PGD_MOUSE|Q9DCD0_K38	KO_Late-WT_Late	1.19366	0.219255	19.3593	2.79176e-05	0.00195653	4.55412	1.19366	2.70851
6PGD_MOUSE|Q9DCD0_K38	KO_Uninfected-WT_Uninfected	0.91967	0.253174	19.3593	0.00172924	0.0258225	2.76214	0.91967	1.588
6PGD_MOUSE|Q9DCD0_K38	KO_Early-KO_Uninfected	0.243535	0.236822	19.3593	0.316466	0.70615	0.499674	0.243535	0.151103
6PGD_MOUSE|Q9DCD0_K38	KO_Late-KO_Uninfected	-0.0379271	0.236822	19.3593	0.874422	0.959492	0.0582788	0.0379271	0.0179589
6PGD_MOUSE|Q9DCD0_K38	WT_Early-Wt_Uninfected	-0.276195	0.236822	19.3593	0.25768	0.545205	0.58892	0.276195	0.26344
6PGD_MOUSE|Q9DCD0_K38	WT_Late-Wt_Uninfected	-0.311915	0.236822	19.3593	0.203189	0.461652	0.6921	0.311915	0.335686
6PGD_MOUSE|Q9DCD0_K38	Infected-Uninfected	-0.0956253	0.148436	19.3593	0.526994	0.726319	0.278194	0.0956253	0.138873
6PGD_MOUSE|Q9DCD0_K38	KO-WT	1.18424	0.133434	19.3593	2.96876e-08	2.12422e-06	7.52742	1.18424	5.6728
6PGD_MOUSE|Q9DCD0_K38	Early-Uninfected	-0.0163297	0.167459	19.3593	0.92332	0.970573	0.0346476	0.0163297	0.0129718
6PGD_MOUSE|Q9DCD0_K38	Late-Uninfected	-0.174921	0.167459	19.3593	0.309094	0.530825	0.509909	0.174921	0.275049
6PGD_MOUSE|Q9DCD0_K48	KO_Early-WT_Early	0.31411	0.229166	8.35931	0.206154	0.372754	0.685809	0.31411	0.428578
6PGD_MOUSE|Q9DCD0_K48	KO_Late-WT_Late	0.159886	0.229166	8.35931	0.504313	0.695248	0.2973	0.159886	0.15786
6PGD_MOUSE|Q9DCD0_K48	KO_Uninfected-WT_Uninfected	0.529734	0.28067	8.35931	0.094228	0.259465	1.02582	0.529734	0.585922
6PGD_MOUSE|Q9DCD0_K48	KO_Early-KO_Uninfected	-0.120513	0.229166	8.35931	0.612638	0.874256	0.212796	0.120513	0.0583612
6PGD_MOUSE|Q9DCD0_K48	KO_Late-KO_Uninfected	-0.484914	0.229166	8.35931	0.0657736	0.308534	1.18195	0.484914	0.510697
6PGD_MOUSE|Q9DCD0_K48	WT_Early-Wt_Uninfected	0.095111	0.28067	8.35931	0.743063	0.892805	0.128974	0.095111	0.0492432
6PGD_MOUSE|Q9DCD0_K48	WT_Late-Wt_Uninfected	-0.115067	0.28067	8.35931	0.692134	0.854973	0.15981	0.115067	0.0680476
6PGD_MOUSE|Q9DCD0_K48	Infected-Uninfected	-0.156346	0.162045	8.35931	0.361711	0.587931	0.441639	0.156346	0.230674
6PGD_MOUSE|Q9DCD0_K48	KO-WT	0.334577	0.14291	8.35931	0.0460114	0.0934261	1.33713	0.334577	1.02953
6PGD_MOUSE|Q9DCD0_K48	Early-Uninfected	-0.0127009	0.181172	8.35931	0.945759	0.979389	0.0242196	0.0127009	0.00904474
6PGD_MOUSE|Q9DCD0_K48	Late-Uninfected	-0.29999	0.181172	8.35931	0.134723	0.330176	0.870558	0.29999	0.481254
6PGD_MOUSE|Q9DCD0_K51	KO_Early-WT_Early	0.556807	0.171849	19.3593	0.00423148	0.0312128	2.37351	0.556807	1.50567
6PGD_MOUSE|Q9DCD0_K51	KO_Late-WT_Late	0.326	0.171849	19.3593	0.0728461	0.21296	1.13759	0.326	0.671701
6PGD_MOUSE|Q9DCD0_K51	KO_Uninfected-WT_Uninfected	0.0865224	0.198434	19.3593	0.667641	0.808967	0.175457	0.0865224	0.092069
6PGD_MOUSE|Q9DCD0_K51	KO_Early-KO_Uninfected	0.208612	0.185618	19.3593	0.274807	0.669208	0.560972	0.208612	0.174439
6PGD_MOUSE|Q9DCD0_K51	KO_Late-KO_Uninfected	-0.159065	0.185618	19.3593	0.401956	0.71339	0.395821	0.159065	0.146673
6PGD_MOUSE|Q9DCD0_K51	WT_Early-Wt_Uninfected	-0.261672	0.185618	19.3593	0.174482	0.448818	0.75825	0.261672	0.34793
6PGD_MOUSE|Q9DCD0_K51	WT_Late-Wt_Uninfected	-0.398542	0.185618	19.3593	0.0446517	0.199577	1.35016	0.398542	0.69989
6PGD_MOUSE|Q9DCD0_K51	Infected-Uninfected	-0.152667	0.116342	19.3593	0.204792	0.422315	0.688687	0.152667	0.374364
6PGD_MOUSE|Q9DCD0_K51	KO-WT	0.323109	0.104584	19.3593	0.00594013	0.0194245	2.2262	0.323109	1.71165
6PGD_MOUSE|Q9DCD0_K51	Early-Uninfected	-0.0265296	0.131252	19.3593	0.841926	0.938214	0.0747262	0.0265296	0.0276981
6PGD_MOUSE|Q9DCD0_K51	Late-Uninfected	-0.278804	0.131252	19.3593	0.0467472	0.169742	1.33024	0.278804	0.770212
6PGD_MOUSE|Q9DCD0_K59	KO_Early-WT_Early	0.10005	0.103667	19.3593	0.34639	0.521241	0.460435	0.10005	0.282962
6PGD_MOUSE|Q9DCD0_K59	KO_Late-WT_Late	0.27532	0.103667	19.3593	0.0154443	0.0836733	1.81123	0.27532	1.07741
6PGD_MOUSE|Q9DCD0_K59	KO_Uninfected-WT_Uninfected	0.340652	0.119704	19.3593	0.0102078	0.0752332	1.99107	0.340652	1.12359
6PGD_MOUSE|Q9DCD0_K59	KO_Early-KO_Uninfected	-0.15	0.111973	19.3593	0.195889	0.590625	0.707991	0.15	0.228688
6PGD_MOUSE|Q9DCD0_K59	KO_Late-KO_Uninfected	-0.0353063	0.111973	19.3593	0.755899	0.916051	0.121536	0.0353063	0.0380803
6PGD_MOUSE|Q9DCD0_K59	WT_Early-Wt_Uninfected	0.0906019	0.111973	19.3593	0.428268	0.699556	0.368285	0.0906019	0.155178
6PGD_MOUSE|Q9DCD0_K59	WT_Late-Wt_Uninfected	0.0300262	0.111973	19.3593	0.791416	0.910079	0.101595	0.0300262	0.0409207
6PGD_MOUSE|Q9DCD0_K59	Infected-Uninfected	-0.0161695	0.0701829	19.3593	0.820205	0.908926	0.0860774	0.0161695	0.0414714
6PGD_MOUSE|Q9DCD0_K59	KO-WT	0.238674	0.0630897	19.3593	0.00122361	0.00606296	2.91236	0.238674	2.21731
6PGD_MOUSE|Q9DCD0_K59	Early-Uninfected	-0.0296989	0.079177	19.3593	0.711667	0.878643	0.147723	0.0296989	0.0561875
6PGD_MOUSE|Q9DCD0_K59	Late-Uninfected	-0.00264005	0.079177	19.3593	0.973742	0.987544	0.0115561	0.00264005	0.00544373
A0A0R4J0H6_MOUSE|A0A0R4J0H6_K103	KO_Early-WT_Early	-1.02973	0.31589	19.3593	0.00404736	0.0303804	2.39283	1.02973	1.51741
A0A0R4J0H6_MOUSE|A0A0R4J0H6_K103	KO_Late-WT_Late	-1.55576	0.31589	19.3593	8.92874e-05	0.00400697	4.04921	1.55576	2.39718
A0A0R4J0H6_MOUSE|A0A0R4J0H6_K103	KO_Uninfected-WT_Uninfected	-0.729589	0.364759	19.3593	0.0597056	0.201494	1.22399	0.729589	0.695738
A0A0R4J0H6_MOUSE|A0A0R4J0H6_K103	KO_Early-KO_Uninfected	-0.0355114	0.3412	19.3593	0.918178	0.977961	0.037073	0.0355114	0.00967842
A0A0R4J0H6_MOUSE|A0A0R4J0H6_K103	KO_Late-KO_Uninfected	0.792801	0.3412	19.3593	0.0311757	0.209881	1.50618	0.792801	0.678026
A0A0R4J0H6_MOUSE|A0A0R4J0H6_K103	WT_Early-Wt_Uninfected	0.264625	0.3412	19.3593	0.447374	0.712316	0.34933	0.264625	0.147327
A0A0R4J0H6_MOUSE|A0A0R4J0H6_K103	WT_Late-Wt_Uninfected	1.61898	0.3412	19.3593	0.000134375	0.00419409	3.87168	1.61898	2.37736
A0A0R4J0H6_MOUSE|A0A0R4J0H6_K103	Infected-Uninfected	0.660223	0.213859	19.3593	0.00597065	0.0450196	2.22398	0.660223	1.3466
A0A0R4J0H6_MOUSE|A0A0R4J0H6_K103	KO-WT	-1.10503	0.192245	19.3593	1.43209e-05	0.000228956	4.84403	1.10503	3.64025
A0A0R4J0H6_MOUSE|A0A0R4J0H6_K103	Early-Uninfected	0.114557	0.241265	19.3593	0.64023	0.840717	0.193664	0.114557	0.0753502
A0A0R4J0H6_MOUSE|A0A0R4J0H6_K103	Late-Uninfected	1.20589	0.241265	19.3593	7.56779e-05	0.00165457	4.12103	1.20589	2.78132
A0A0R4J0H6_MOUSE|A0A0R4J0H6_K104	KO_Early-WT_Early	-0.161429	0.325709	19.3593	0.625739	0.759314	0.203607	0.161429	0.119578
A0A0R4J0H6_MOUSE|A0A0R4J0H6_K104	KO_Late-WT_Late	-0.857107	0.325709	19.3593	0.0162745	0.0857195	1.78849	0.857107	1.06692
A0A0R4J0H6_MOUSE|A0A0R4J0H6_K104	KO_Uninfected-WT_Uninfected	-0.789481	0.376096	19.3593	0.0491385	0.180082	1.30858	0.789481	0.744531
A0A0R4J0H6_MOUSE|A0A0R4J0H6_K104	KO_Early-KO_Uninfected	-0.20008	0.351805	19.3593	0.576084	0.855387	0.239514	0.20008	0.0678375
A0A0R4J0H6_MOUSE|A0A0R4J0H6_K104	KO_Late-KO_Uninfected	0.637678	0.351805	19.3593	0.085434	0.349149	1.06837	0.637678	0.45699
A0A0R4J0H6_MOUSE|A0A0R4J0H6_K104	WT_Early-Wt_Uninfected	-0.828132	0.351805	19.3593	0.029275	0.17565	1.5335	0.828132	0.755352
A0A0R4J0H6_MOUSE|A0A0R4J0H6_K104	WT_Late-Wt_Uninfected	0.705304	0.351805	19.3593	0.0591707	0.233106	1.22789	0.705304	0.632447
A0A0R4J0H6_MOUSE|A0A0R4J0H6_K104	Infected-Uninfected	0.0786927	0.220506	19.3593	0.725047	0.855081	0.139634	0.0786927	0.0679929
A0A0R4J0H6_MOUSE|A0A0R4J0H6_K104	KO-WT	-0.602673	0.19822	19.3593	0.00662936	0.021151	2.17853	0.602673	1.67467
A0A0R4J0H6_MOUSE|A0A0R4J0H6_K104	Early-Uninfected	-0.514106	0.248764	19.3593	0.0524078	0.228455	1.2806	0.514106	0.641199
A0A0R4J0H6_MOUSE|A0A0R4J0H6_K104	Late-Uninfected	0.671491	0.248764	19.3593	0.0140571	0.0772462	1.8521	0.671491	1.11212
A0A0R4J0H6_MOUSE|A0A0R4J0H6_K119	KO_Early-WT_Early	-0.349522	0.257307	19.3593	0.189961	0.353367	0.721335	0.349522	0.451774
A0A0R4J0H6_MOUSE|A0A0R4J0H6_K119	KO_Late-WT_Late	-0.993938	0.257307	19.3593	0.00101841	0.0173096	2.99208	0.993938	1.76171
A0A0R4J0H6_MOUSE|A0A0R4J0H6_K119	KO_Uninfected-WT_Uninfected	-0.89485	0.297113	19.3593	0.00706641	0.0609977	2.1508	0.89485	1.21469
A0A0R4J0H6_MOUSE|A0A0R4J0H6_K119	KO_Early-KO_Uninfected	-0.240336	0.277924	19.3593	0.397762	0.760974	0.400376	0.240336	0.11863
A0A0R4J0H6_MOUSE|A0A0R4J0H6_K119	KO_Late-KO_Uninfected	0.48337	0.277924	19.3593	0.0978735	0.372062	1.00933	0.48337	0.429385
A0A0R4J0H6_MOUSE|A0A0R4J0H6_K119	WT_Early-Wt_Uninfected	-0.785663	0.277924	19.3593	0.0106403	0.100094	1.97305	0.785663	0.999592
A0A0R4J0H6_MOUSE|A0A0R4J0H6_K119	WT_Late-Wt_Uninfected	0.582457	0.277924	19.3593	0.0494719	0.212756	1.30564	0.582457	0.672118
A0A0R4J0H6_MOUSE|A0A0R4J0H6_K119	Infected-Uninfected	0.00995695	0.174198	19.3593	0.955005	0.978727	0.0199946	0.00995695	0.00933862
A0A0R4J0H6_MOUSE|A0A0R4J0H6_K119	KO-WT	-0.746103	0.156592	19.3593	0.000128488	0.00118015	3.89114	0.746103	2.92806
A0A0R4J0H6_MOUSE|A0A0R4J0H6_K119	Early-Uninfected	-0.513	0.196522	19.3593	0.0170304	0.116469	1.76878	0.513	0.933789
A0A0R4J0H6_MOUSE|A0A0R4J0H6_K119	Late-Uninfected	0.532913	0.196522	19.3593	0.0136833	0.075885	1.86381	0.532913	1.11984
A0A0R4J0H6_MOUSE|A0A0R4J0H6_K123	KO_Early-WT_Early	-0.760087	0.266093	19.3593	0.0099704	0.0531011	2.00129	0.760087	1.2749
A0A0R4J0H6_MOUSE|A0A0R4J0H6_K123	KO_Late-WT_Late	-1.20983	0.266093	19.3593	0.000211308	0.00669939	3.67508	1.20983	2.17396
A0A0R4J0H6_MOUSE|A0A0R4J0H6_K123	KO_Uninfected-WT_Uninfected	-0.598631	0.307258	19.3593	0.0660244	0.211862	1.1803	0.598631	0.673946
A0A0R4J0H6_MOUSE|A0A0R4J0H6_K123	KO_Early-KO_Uninfected	-0.260484	0.287413	19.3593	0.375917	0.746219	0.424908	0.260484	0.127134
A0A0R4J0H6_MOUSE|A0A0R4J0H6_K123	KO_Late-KO_Uninfected	0.608517	0.287413	19.3593	0.0474021	0.260432	1.3242	0.608517	0.584306
A0A0R4J0H6_MOUSE|A0A0R4J0H6_K123	WT_Early-Wt_Uninfected	-0.099027	0.287413	19.3593	0.734151	0.889537	0.134215	0.099027	0.050836
A0A0R4J0H6_MOUSE|A0A0R4J0H6_K123	WT_Late-Wt_Uninfected	1.21972	0.287413	19.3593	0.000423525	0.00919975	3.37312	1.21972	2.03622
A0A0R4J0H6_MOUSE|A0A0R4J0H6_K123	Infected-Uninfected	0.367182	0.180146	19.3593	0.055422	0.192165	1.25632	0.367182	0.716327
A0A0R4J0H6_MOUSE|A0A0R4J0H6_K123	KO-WT	-0.856184	0.161939	19.3593	3.95775e-05	0.000490858	4.40255	0.856184	3.30904
A0A0R4J0H6_MOUSE|A0A0R4J0H6_K123	Early-Uninfected	-0.179755	0.203232	19.3593	0.387288	0.665601	0.411966	0.179755	0.176786
A0A0R4J0H6_MOUSE|A0A0R4J0H6_K123	Late-Uninfected	0.914119	0.203232	19.3593	0.000236266	0.00386796	3.6266	0.914119	2.41252
A0A0R4J0P5_MOUSE|A0A0R4J0P5_K309	KO_Early-WT_Early	0.692833	0.200356	8.35931	0.0080334	0.046174	2.0951	0.692833	1.3356
A0A0R4J0P5_MOUSE|A0A0R4J0P5_K309	KO_Late-WT_Late	0.762543	0.200356	8.35931	0.00478676	0.0436491	2.31996	0.762543	1.36003
A0A0R4J0P5_MOUSE|A0A0R4J0P5_K309	KO_Uninfected-WT_Uninfected	0.545863	0.245384	8.35931	0.0553799	0.193206	1.25665	0.545863	0.713979
A0A0R4J0P5_MOUSE|A0A0R4J0P5_K309	KO_Early-KO_Uninfected	-0.390991	0.200356	8.35931	0.0852363	0.418169	1.06938	0.390991	0.378648
A0A0R4J0P5_MOUSE|A0A0R4J0P5_K309	KO_Late-KO_Uninfected	0.455027	0.200356	8.35931	0.0514318	0.272333	1.28877	0.455027	0.5649
A0A0R4J0P5_MOUSE|A0A0R4J0P5_K309	WT_Early-Wt_Uninfected	-0.537961	0.245384	8.35931	0.058283	0.255893	1.23446	0.537961	0.591941
A0A0R4J0P5_MOUSE|A0A0R4J0P5_K309	WT_Late-Wt_Uninfected	0.238347	0.245384	8.35931	0.358653	0.623304	0.445326	0.238347	0.2053
A0A0R4J0P5_MOUSE|A0A0R4J0P5_K309	Infected-Uninfected	-0.0588944	0.141673	8.35931	0.688091	0.833497	0.162354	0.0588944	0.0790959
A0A0R4J0P5_MOUSE|A0A0R4J0P5_K309	KO-WT	0.667079	0.124944	8.35931	0.000600548	0.00361459	3.22145	0.667079	2.44194
A0A0R4J0P5_MOUSE|A0A0R4J0P5_K309	Early-Uninfected	-0.464476	0.158395	8.35931	0.0180513	0.120237	1.74349	0.464476	0.919964
A0A0R4J0P5_MOUSE|A0A0R4J0P5_K309	Late-Uninfected	0.346687	0.158395	8.35931	0.0586139	0.1951	1.232	0.346687	0.709743
A0A0R4J140_MOUSE|A0A0R4J140_K4	KO_Early-WT_Early	-0.0777515	0.172927	8.35931	0.664415	0.788538	0.17756	0.0777515	0.103177
A0A0R4J140_MOUSE|A0A0R4J140_K4	KO_Late-WT_Late	-0.198032	0.172927	8.35931	0.283862	0.491878	0.546892	0.198032	0.308142
A0A0R4J140_MOUSE|A0A0R4J140_K4	KO_Uninfected-WT_Uninfected	-0.243357	0.211792	8.35931	0.282354	0.491879	0.549207	0.243357	0.308142
A0A0R4J140_MOUSE|A0A0R4J140_K4	KO_Early-KO_Uninfected	0.0828339	0.172927	8.35931	0.644212	0.887125	0.190972	0.0828339	0.0520152
A0A0R4J140_MOUSE|A0A0R4J140_K4	KO_Late-KO_Uninfected	-0.181397	0.172927	8.35931	0.323568	0.651851	0.490035	0.181397	0.185852
A0A0R4J140_MOUSE|A0A0R4J140_K4	WT_Early-Wt_Uninfected	-0.0827714	0.211792	8.35931	0.705706	0.875606	0.151376	0.0827714	0.0576911
A0A0R4J140_MOUSE|A0A0R4J140_K4	WT_Late-Wt_Uninfected	-0.226721	0.211792	8.35931	0.314331	0.579004	0.502613	0.226721	0.237319
A0A0R4J140_MOUSE|A0A0R4J140_K4	Infected-Uninfected	-0.102014	0.122278	8.35931	0.427321	0.645903	0.369246	0.102014	0.189833
A0A0R4J140_MOUSE|A0A0R4J140_K4	KO-WT	-0.173047	0.107839	8.35931	0.145609	0.23131	0.836812	0.173047	0.635805
A0A0R4J140_MOUSE|A0A0R4J140_K4	Early-Uninfected	3.12557e-05	0.136711	8.35931	0.999823	0.999876	7.69007e-05	3.12557e-05	5.40417e-05
A0A0R4J140_MOUSE|A0A0R4J140_K4	Late-Uninfected	-0.204059	0.136711	8.35931	0.17228	0.380564	0.763765	0.204059	0.419573
A0A0U1RQ91_MOUSE|A0A0U1RQ91_K50	KO_Early-WT_Early	-0.118397	0.205328	8.35931	0.579384	0.721542	0.237033	0.118397	0.141739
A0A0U1RQ91_MOUSE|A0A0U1RQ91_K50	KO_Late-WT_Late	-0.11692	0.205328	8.35931	0.584039	0.755294	0.233558	0.11692	0.121884
A0A0U1RQ91_MOUSE|A0A0U1RQ91_K50	KO_Uninfected-WT_Uninfected	-0.424939	0.251474	8.35931	0.127912	0.310493	0.893087	0.424939	0.507949
A0A0U1RQ91_MOUSE|A0A0U1RQ91_K50	KO_Early-KO_Uninfected	0.162639	0.205328	8.35931	0.450199	0.795659	0.346596	0.162639	0.0992731
A0A0U1RQ91_MOUSE|A0A0U1RQ91_K50	KO_Late-KO_Uninfected	0.0762187	0.205328	8.35931	0.719717	0.899472	0.142838	0.0762187	0.0460124
A0A0U1RQ91_MOUSE|A0A0U1RQ91_K50	WT_Early-Wt_Uninfected	-0.143903	0.251474	8.35931	0.582219	0.804554	0.234914	0.143903	0.0944446
A0A0U1RQ91_MOUSE|A0A0U1RQ91_K50	WT_Late-Wt_Uninfected	-0.231801	0.251474	8.35931	0.382482	0.645161	0.417389	0.231801	0.190332
A0A0U1RQ91_MOUSE|A0A0U1RQ91_K50	Infected-Uninfected	-0.0342118	0.145189	8.35931	0.819385	0.908534	0.0865118	0.0342118	0.0416589
A0A0U1RQ91_MOUSE|A0A0U1RQ91_K50	KO-WT	-0.220085	0.128044	8.35931	0.122344	0.201582	0.912417	0.220085	0.695548
A0A0U1RQ91_MOUSE|A0A0U1RQ91_K50	Early-Uninfected	0.00936753	0.162326	8.35931	0.955337	0.983337	0.0198435	0.00936753	0.0072978
A0A0U1RQ91_MOUSE|A0A0U1RQ91_K50	Late-Uninfected	-0.0777911	0.162326	8.35931	0.644063	0.804022	0.191072	0.0777911	0.094732
A0A140LI31_MOUSE|A0A140LI31_K78	KO_Early-WT_Early	-0.139963	0.201217	8.35931	0.505564	0.663301	0.296224	0.139963	0.178289
A0A140LI31_MOUSE|A0A140LI31_K78	KO_Late-WT_Late	-0.142834	0.201217	8.35931	0.497118	0.689471	0.303541	0.142834	0.161484
A0A140LI31_MOUSE|A0A140LI31_K78	KO_Uninfected-WT_Uninfected	0.254658	0.246439	8.35931	0.330407	0.538431	0.480951	0.254658	0.26887
A0A140LI31_MOUSE|A0A140LI31_K78	KO_Early-KO_Uninfected	0.0827835	0.201217	8.35931	0.691115	0.903325	0.160449	0.0827835	0.0441561
A0A140LI31_MOUSE|A0A140LI31_K78	KO_Late-KO_Uninfected	-0.124074	0.201217	8.35931	0.553904	0.812497	0.256566	0.124074	0.0901784
A0A140LI31_MOUSE|A0A140LI31_K78	WT_Early-Wt_Uninfected	0.477405	0.246439	8.35931	0.0871644	0.314419	1.05966	0.477405	0.502491
A0A140LI31_MOUSE|A0A140LI31_K78	WT_Late-Wt_Uninfected	0.273418	0.246439	8.35931	0.298121	0.562347	0.525607	0.273418	0.249995
A0A140LI31_MOUSE|A0A140LI31_K78	Infected-Uninfected	0.177383	0.142282	8.35931	0.246306	0.472288	0.608524	0.177383	0.325793
A0A140LI31_MOUSE|A0A140LI31_K78	KO-WT	-0.00937964	0.125481	8.35931	0.942172	0.963279	0.0258699	0.00937964	0.016248
A0A140LI31_MOUSE|A0A140LI31_K78	Early-Uninfected	0.280094	0.159076	8.35931	0.114695	0.356238	0.940454	0.280094	0.448259
A0A140LI31_MOUSE|A0A140LI31_K78	Late-Uninfected	0.0746717	0.159076	8.35931	0.650778	0.807746	0.186567	0.0746717	0.092725
A0A140LI88_MOUSE|A0A140LI88_K502	KO_Early-WT_Early	-0.0576035	0.195896	8.35931	0.775889	0.864154	0.110201	0.0576035	0.0634089
A0A140LI88_MOUSE|A0A140LI88_K502	KO_Late-WT_Late	-0.320402	0.195896	8.35931	0.138943	0.315295	0.857163	0.320402	0.501283
A0A140LI88_MOUSE|A0A140LI88_K502	KO_Uninfected-WT_Uninfected	-0.233815	0.239923	8.35931	0.357142	0.563244	0.44716	0.233815	0.249303
A0A140LI88_MOUSE|A0A140LI88_K502	KO_Early-KO_Uninfected	-0.276201	0.195896	8.35931	0.194663	0.589673	0.710717	0.276201	0.229389
A0A140LI88_MOUSE|A0A140LI88_K502	KO_Late-KO_Uninfected	-0.485959	0.195896	8.35931	0.0368564	0.228095	1.43349	0.485959	0.641885
A0A140LI88_MOUSE|A0A140LI88_K502	WT_Early-Wt_Uninfected	-0.452413	0.239923	8.35931	0.0944825	0.329452	1.02465	0.452413	0.482208
A0A140LI88_MOUSE|A0A140LI88_K502	WT_Late-Wt_Uninfected	-0.399373	0.239923	8.35931	0.132936	0.367785	0.876357	0.399373	0.434406
A0A140LI88_MOUSE|A0A140LI88_K502	Infected-Uninfected	-0.403486	0.13852	8.35931	0.0186126	0.0965252	1.73019	0.403486	1.01536
A0A140LI88_MOUSE|A0A140LI88_K502	KO-WT	-0.20394	0.122163	8.35931	0.13196	0.214015	0.879556	0.20394	0.669556
A0A140LI88_MOUSE|A0A140LI88_K502	Early-Uninfected	-0.364307	0.15487	8.35931	0.0452006	0.210108	1.34486	0.364307	0.677558
A0A140LI88_MOUSE|A0A140LI88_K502	Late-Uninfected	-0.442666	0.15487	8.35931	0.0202762	0.0992883	1.69301	0.442666	1.0031
A0A1D5RLD1_MOUSE|A0A1D5RLD1_K773	KO_Early-WT_Early	-0.261581	0.209914	19.3593	0.227586	0.397818	0.642855	0.261581	0.400315
A0A1D5RLD1_MOUSE|A0A1D5RLD1_K773	KO_Late-WT_Late	-0.348386	0.209914	19.3593	0.113096	0.277514	0.946554	0.348386	0.556715
A0A1D5RLD1_MOUSE|A0A1D5RLD1_K773	KO_Uninfected-WT_Uninfected	0.130869	0.242388	19.3593	0.595413	0.756434	0.225182	0.130869	0.121229
A0A1D5RLD1_MOUSE|A0A1D5RLD1_K773	KO_Early-KO_Uninfected	0.0592096	0.226734	19.3593	0.796741	0.940936	0.0986827	0.0592096	0.0264399
A0A1D5RLD1_MOUSE|A0A1D5RLD1_K773	KO_Late-KO_Uninfected	-0.0972777	0.226734	19.3593	0.672631	0.876164	0.172223	0.0972777	0.0574148
A0A1D5RLD1_MOUSE|A0A1D5RLD1_K773	WT_Early-Wt_Uninfected	0.451659	0.226734	19.3593	0.0606631	0.260094	1.21708	0.451659	0.58487
A0A1D5RLD1_MOUSE|A0A1D5RLD1_K773	WT_Late-Wt_Uninfected	0.381978	0.226734	19.3593	0.108101	0.330044	0.966171	0.381978	0.481428
A0A1D5RLD1_MOUSE|A0A1D5RLD1_K773	Infected-Uninfected	0.198892	0.142113	19.3593	0.177472	0.389592	0.75087	0.198892	0.40939
A0A1D5RLD1_MOUSE|A0A1D5RLD1_K773	KO-WT	-0.1597	0.12775	19.3593	0.226166	0.326347	0.645573	0.1597	0.48632
A0A1D5RLD1_MOUSE|A0A1D5RLD1_K773	Early-Uninfected	0.255434	0.160325	19.3593	0.127305	0.376258	0.895154	0.255434	0.424514
A0A1D5RLD1_MOUSE|A0A1D5RLD1_K773	Late-Uninfected	0.14235	0.160325	19.3593	0.385502	0.602945	0.413974	0.14235	0.219723
A0A1L1SSL0_MOUSE|A0A1L1SSL0_K154	KO_Early-WT_Early	-0.77799	0.456785	8.35931	0.125315	0.26951	0.901995	0.77799	0.569425
A0A1L1SSL0_MOUSE|A0A1L1SSL0_K154	KO_Late-WT_Late	-0.674633	0.456785	8.35931	0.17635	0.364161	0.753623	0.674633	0.438706
A0A1L1SSL0_MOUSE|A0A1L1SSL0_K154	KO_Uninfected-WT_Uninfected	-0.0637713	0.559446	8.35931	0.911936	0.95772	0.0400356	0.0637713	0.0187614
A0A1L1SSL0_MOUSE|A0A1L1SSL0_K154	KO_Early-KO_Uninfected	0.507488	0.456785	8.35931	0.297501	0.690547	0.526512	0.507488	0.160807
A0A1L1SSL0_MOUSE|A0A1L1SSL0_K154	KO_Late-KO_Uninfected	0.966426	0.456785	8.35931	0.0658025	0.308534	1.18176	0.966426	0.510697
A0A1L1SSL0_MOUSE|A0A1L1SSL0_K154	WT_Early-Wt_Uninfected	1.22171	0.559446	8.35931	0.0590774	0.256957	1.22858	1.22171	0.59014
A0A1L1SSL0_MOUSE|A0A1L1SSL0_K154	WT_Late-Wt_Uninfected	1.57729	0.559446	8.35931	0.0215572	0.129419	1.66641	1.57729	0.888003
A0A1L1SSL0_MOUSE|A0A1L1SSL0_K154	Infected-Uninfected	1.06823	0.322996	8.35931	0.0101022	0.0650071	1.99558	1.06823	1.18704
A0A1L1SSL0_MOUSE|A0A1L1SSL0_K154	KO-WT	-0.505465	0.284856	8.35931	0.112295	0.18867	0.949639	0.505465	0.724296
A0A1L1SSL0_MOUSE|A0A1L1SSL0_K154	Early-Uninfected	0.864597	0.361121	8.35931	0.0422899	0.202276	1.37376	0.864597	0.694057
A0A1L1SSL0_MOUSE|A0A1L1SSL0_K154	Late-Uninfected	1.27186	0.361121	8.35931	0.00729541	0.0485665	2.13695	1.27186	1.31366
A0AUN0_MOUSE|A0AUN0_K757	KO_Early-WT_Early	0.457648	0.181898	8.35931	0.0348477	0.118839	1.45783	0.457648	0.925043
A0AUN0_MOUSE|A0AUN0_K757	KO_Late-WT_Late	0.0358098	0.181898	8.35931	0.848634	0.922177	0.0712796	0.0358098	0.0351856
A0AUN0_MOUSE|A0AUN0_K757	KO_Uninfected-WT_Uninfected	-0.43546	0.222778	8.35931	0.0848103	0.243892	1.07155	0.43546	0.612802
A0AUN0_MOUSE|A0AUN0_K757	KO_Early-KO_Uninfected	0.219906	0.181898	8.35931	0.259764	0.656566	0.585422	0.219906	0.182722
A0AUN0_MOUSE|A0AUN0_K757	KO_Late-KO_Uninfected	0.139767	0.181898	8.35931	0.463412	0.753701	0.334033	0.139767	0.122801
A0AUN0_MOUSE|A0AUN0_K757	WT_Early-Wt_Uninfected	-0.673202	0.222778	8.35931	0.0156967	0.123998	1.80419	0.673202	0.906585
A0AUN0_MOUSE|A0AUN0_K757	WT_Late-Wt_Uninfected	-0.331502	0.222778	8.35931	0.173461	0.425175	0.760797	0.331502	0.371432
A0AUN0_MOUSE|A0AUN0_K757	Infected-Uninfected	-0.161258	0.128621	8.35931	0.243862	0.469831	0.612856	0.161258	0.328058
A0AUN0_MOUSE|A0AUN0_K757	KO-WT	0.0193325	0.113433	8.35931	0.868725	0.908595	0.0611179	0.0193325	0.0416294
A0AUN0_MOUSE|A0AUN0_K757	Early-Uninfected	-0.226648	0.143803	8.35931	0.152032	0.415462	0.818066	0.226648	0.381469
A0AUN0_MOUSE|A0AUN0_K757	Late-Uninfected	-0.0958675	0.143803	8.35931	0.522961	0.717053	0.281531	0.0958675	0.144449
A0AUN0_MOUSE|A0AUN0_K773	KO_Early-WT_Early	0.196593	0.144434	19.3593	0.189108	0.352479	0.723291	0.196593	0.452866
A0AUN0_MOUSE|A0AUN0_K773	KO_Late-WT_Late	-0.0894744	0.144434	19.3593	0.54282	0.72613	0.265344	0.0894744	0.138986
A0AUN0_MOUSE|A0AUN0_K773	KO_Uninfected-WT_Uninfected	-0.151109	0.166778	19.3593	0.376047	0.579126	0.424758	0.151109	0.237227
A0AUN0_MOUSE|A0AUN0_K773	KO_Early-KO_Uninfected	0.0663637	0.156006	19.3593	0.675243	0.89613	0.17054	0.0663637	0.047629
A0AUN0_MOUSE|A0AUN0_K773	KO_Late-KO_Uninfected	-0.129932	0.156006	19.3593	0.415078	0.722643	0.38187	0.129932	0.141076
A0AUN0_MOUSE|A0AUN0_K773	WT_Early-Wt_Uninfected	-0.281339	0.156006	19.3593	0.0869154	0.313946	1.0609	0.281339	0.503146
A0AUN0_MOUSE|A0AUN0_K773	WT_Late-Wt_Uninfected	-0.191567	0.156006	19.3593	0.234189	0.497092	0.630434	0.191567	0.303563
A0AUN0_MOUSE|A0AUN0_K773	Infected-Uninfected	-0.134118	0.097782	19.3593	0.185875	0.399617	0.73078	0.134118	0.398357
A0AUN0_MOUSE|A0AUN0_K773	KO-WT	-0.0146637	0.0878995	19.3593	0.869239	0.908948	0.0608607	0.0146637	0.041461
A0AUN0_MOUSE|A0AUN0_K773	Early-Uninfected	-0.107487	0.110313	19.3593	0.341884	0.622616	0.466121	0.107487	0.20578
A0AUN0_MOUSE|A0AUN0_K773	Late-Uninfected	-0.160749	0.110313	19.3593	0.161088	0.365872	0.792936	0.160749	0.436671
A0JLN1_MOUSE|A0JLN1_K300	KO_Early-WT_Early	0.149907	0.120872	19.3593	0.229718	0.400563	0.638804	0.149907	0.397329
A0JLN1_MOUSE|A0JLN1_K300	KO_Late-WT_Late	0.14449	0.120872	19.3593	0.24637	0.450586	0.608413	0.14449	0.346222
A0JLN1_MOUSE|A0JLN1_K300	KO_Uninfected-WT_Uninfected	0.431781	0.139571	19.3593	0.0058851	0.0554826	2.23025	0.431781	1.25584
A0JLN1_MOUSE|A0JLN1_K300	KO_Early-KO_Uninfected	-0.113402	0.130557	19.3593	0.395704	0.760148	0.40263	0.113402	0.119102
A0JLN1_MOUSE|A0JLN1_K300	KO_Late-KO_Uninfected	-0.123517	0.130557	19.3593	0.35577	0.679017	0.44883	0.123517	0.16812
A0JLN1_MOUSE|A0JLN1_K300	WT_Early-Wt_Uninfected	0.168472	0.130557	19.3593	0.212109	0.493603	0.673441	0.168472	0.306623
A0JLN1_MOUSE|A0JLN1_K300	WT_Late-Wt_Uninfected	0.163774	0.130557	19.3593	0.224621	0.485571	0.64855	0.163774	0.313747
A0JLN1_MOUSE|A0JLN1_K300	Infected-Uninfected	0.0238317	0.0818308	19.3593	0.773971	0.883552	0.111275	0.0238317	0.0537679
A0JLN1_MOUSE|A0JLN1_K300	KO-WT	0.24206	0.0735604	19.3593	0.00377401	0.0137962	2.4232	0.24206	1.86024
A0JLN1_MOUSE|A0JLN1_K300	Early-Uninfected	0.0275346	0.0923176	19.3593	0.768683	0.903147	0.114253	0.0275346	0.0442416
A0JLN1_MOUSE|A0JLN1_K300	Late-Uninfected	0.0201289	0.0923176	19.3593	0.82968	0.912925	0.0810893	0.0201289	0.0395651
A0JLN1_MOUSE|A0JLN1_K383	KO_Early-WT_Early	-0.0121885	0.212403	8.35931	0.955587	0.976577	0.0197296	0.0121885	0.0102936
A0JLN1_MOUSE|A0JLN1_K383	KO_Late-WT_Late	0.507548	0.212403	8.35931	0.0426038	0.154145	1.37055	0.507548	0.81207
A0JLN1_MOUSE|A0JLN1_K383	KO_Uninfected-WT_Uninfected	0.954315	0.260139	8.35931	0.00586205	0.0553703	2.23195	0.954315	1.25672
A0JLN1_MOUSE|A0JLN1_K383	KO_Early-KO_Uninfected	-0.380283	0.212403	8.35931	0.109563	0.46619	0.960336	0.380283	0.331437
A0JLN1_MOUSE|A0JLN1_K383	KO_Late-KO_Uninfected	0.0615181	0.212403	8.35931	0.779154	0.923848	0.108377	0.0615181	0.0343996
A0JLN1_MOUSE|A0JLN1_K383	WT_Early-Wt_Uninfected	0.586221	0.260139	8.35931	0.0528907	0.242852	1.27662	0.586221	0.614658
A0JLN1_MOUSE|A0JLN1_K383	WT_Late-Wt_Uninfected	0.508285	0.260139	8.35931	0.0849144	0.287478	1.07102	0.508285	0.541395
A0JLN1_MOUSE|A0JLN1_K383	Infected-Uninfected	0.193935	0.150192	8.35931	0.231177	0.454798	0.636055	0.193935	0.342182
A0JLN1_MOUSE|A0JLN1_K383	KO-WT	0.483225	0.132457	8.35931	0.00604141	0.0196928	2.21886	0.483225	1.70569
A0JLN1_MOUSE|A0JLN1_K383	Early-Uninfected	0.102969	0.167919	8.35931	0.556055	0.789789	0.254882	0.102969	0.102489
A0JLN1_MOUSE|A0JLN1_K383	Late-Uninfected	0.284902	0.167919	8.35931	0.126575	0.31762	0.897653	0.284902	0.498092
A0JLN1_MOUSE|A0JLN1_K391	KO_Early-WT_Early	-0.214878	0.249001	19.3593	0.398726	0.56902	0.399326	0.214878	0.244873
A0JLN1_MOUSE|A0JLN1_K391	KO_Late-WT_Late	0.110622	0.249001	19.3593	0.661779	0.810839	0.179287	0.110622	0.0910653
A0JLN1_MOUSE|A0JLN1_K391	KO_Uninfected-WT_Uninfected	0.633454	0.287522	19.3593	0.0398836	0.160744	1.39921	0.633454	0.793864
A0JLN1_MOUSE|A0JLN1_K391	KO_Early-KO_Uninfected	-0.188656	0.268952	19.3593	0.491371	0.816089	0.30859	0.188656	0.0882622
A0JLN1_MOUSE|A0JLN1_K391	KO_Late-KO_Uninfected	-0.213902	0.268952	19.3593	0.436074	0.736266	0.36044	0.213902	0.132965
A0JLN1_MOUSE|A0JLN1_K391	WT_Early-Wt_Uninfected	0.659676	0.268952	19.3593	0.0238123	0.157934	1.6232	0.659676	0.801523
A0JLN1_MOUSE|A0JLN1_K391	WT_Late-Wt_Uninfected	0.30893	0.268952	19.3593	0.264699	0.530175	0.577248	0.30893	0.275581
A0JLN1_MOUSE|A0JLN1_K391	Infected-Uninfected	0.141512	0.168575	19.3593	0.411457	0.633087	0.385675	0.141512	0.198536
A0JLN1_MOUSE|A0JLN1_K391	KO-WT	0.176399	0.151537	19.3593	0.258544	0.362684	0.587466	0.176399	0.440472
A0JLN1_MOUSE|A0JLN1_K391	Early-Uninfected	0.23551	0.190178	19.3593	0.230387	0.51452	0.637542	0.23551	0.288597
A0JLN1_MOUSE|A0JLN1_K391	Late-Uninfected	0.0475141	0.190178	19.3593	0.805343	0.899986	0.0940191	0.0475141	0.0457644
A0JLN1_MOUSE|A0JLN1_K536	KO_Early-WT_Early	-0.134322	0.238877	8.35931	0.588666	0.728525	0.230131	0.134322	0.137555
A0JLN1_MOUSE|A0JLN1_K536	KO_Late-WT_Late	-0.112405	0.238877	8.35931	0.649991	0.803226	0.187092	0.112405	0.0951622
A0JLN1_MOUSE|A0JLN1_K536	KO_Uninfected-WT_Uninfected	-0.0252279	0.292564	8.35931	0.933313	0.966868	0.0299727	0.0252279	0.0146326
A0JLN1_MOUSE|A0JLN1_K536	KO_Early-KO_Uninfected	-0.141718	0.238877	8.35931	0.568702	0.854123	0.245115	0.141718	0.0684796
A0JLN1_MOUSE|A0JLN1_K536	KO_Late-KO_Uninfected	-0.357197	0.238877	8.35931	0.171594	0.491792	0.765499	0.357197	0.308219
A0JLN1_MOUSE|A0JLN1_K536	WT_Early-Wt_Uninfected	-0.0326245	0.292564	8.35931	0.913841	0.970042	0.0391291	0.0326245	0.0132094
A0JLN1_MOUSE|A0JLN1_K536	WT_Late-Wt_Uninfected	-0.270019	0.292564	8.35931	0.381905	0.644826	0.418044	0.270019	0.190558
A0JLN1_MOUSE|A0JLN1_K536	Infected-Uninfected	-0.20039	0.168912	8.35931	0.268103	0.495634	0.571698	0.20039	0.304839
A0JLN1_MOUSE|A0JLN1_K536	KO-WT	-0.0906518	0.148966	8.35931	0.559	0.660701	0.252588	0.0906518	0.179995
A0JLN1_MOUSE|A0JLN1_K536	Early-Uninfected	-0.0871715	0.188849	8.35931	0.656148	0.847593	0.182998	0.0871715	0.0718127
A0JLN1_MOUSE|A0JLN1_K536	Late-Uninfected	-0.313608	0.188849	8.35931	0.133742	0.328732	0.873733	0.313608	0.483158
A0JLR7_MOUSE|A0JLR7_K23	KO_Early-WT_Early	-0.654259	0.247075	8.35931	0.0282595	0.102526	1.54884	0.654259	0.989166
A0JLR7_MOUSE|A0JLR7_K23	KO_Late-WT_Late	-0.524832	0.247075	8.35931	0.0649266	0.199288	1.18758	0.524832	0.700519
A0JLR7_MOUSE|A0JLR7_K23	KO_Uninfected-WT_Uninfected	-0.392577	0.302604	8.35931	0.229175	0.434037	0.639832	0.392577	0.362473
A0JLR7_MOUSE|A0JLR7_K23	KO_Early-KO_Uninfected	-0.146573	0.247075	8.35931	0.568725	0.854123	0.245098	0.146573	0.0684796
A0JLR7_MOUSE|A0JLR7_K23	KO_Late-KO_Uninfected	-0.0197655	0.247075	8.35931	0.938121	0.98572	0.0277412	0.0197655	0.0062464
A0JLR7_MOUSE|A0JLR7_K23	WT_Early-Wt_Uninfected	0.115109	0.302604	8.35931	0.713136	0.879279	0.146828	0.115109	0.0558734
A0JLR7_MOUSE|A0JLR7_K23	WT_Late-Wt_Uninfected	0.11249	0.302604	8.35931	0.719334	0.872653	0.143069	0.11249	0.0591584
A0JLR7_MOUSE|A0JLR7_K23	Infected-Uninfected	0.0153152	0.174708	8.35931	0.93221	0.968113	0.0304864	0.0153152	0.0140739
A0JLR7_MOUSE|A0JLR7_K23	KO-WT	-0.523889	0.154078	8.35931	0.00876909	0.0262278	2.05705	0.523889	1.58124
A0JLR7_MOUSE|A0JLR7_K23	Early-Uninfected	-0.0157318	0.19533	8.35931	0.937703	0.976813	0.0279346	0.0157318	0.0101887
A0JLR7_MOUSE|A0JLR7_K23	Late-Uninfected	0.0463621	0.19533	8.35931	0.818097	0.906418	0.087195	0.0463621	0.0426714
A0JLR7_MOUSE|A0JLR7_K296	KO_Early-WT_Early	-0.831983	0.419629	8.35931	0.0811648	0.203529	1.09063	0.831983	0.691374
A0JLR7_MOUSE|A0JLR7_K296	KO_Late-WT_Late	-0.422194	0.419629	8.35931	0.342595	0.551894	0.465219	0.422194	0.258144
A0JLR7_MOUSE|A0JLR7_K296	KO_Uninfected-WT_Uninfected	-0.993548	0.513939	8.35931	0.0877136	0.248547	1.05693	0.993548	0.604592
A0JLR7_MOUSE|A0JLR7_K296	KO_Early-KO_Uninfected	-0.76325	0.419629	8.35931	0.104833	0.45573	0.979503	0.76325	0.341292
A0JLR7_MOUSE|A0JLR7_K296	KO_Late-KO_Uninfected	-0.0803723	0.419629	8.35931	0.85268	0.950906	0.069214	0.0803723	0.0218624
A0JLR7_MOUSE|A0JLR7_K296	WT_Early-Wt_Uninfected	-0.924815	0.513939	8.35931	0.108034	0.351187	0.96644	0.924815	0.454461
A0JLR7_MOUSE|A0JLR7_K296	WT_Late-Wt_Uninfected	-0.651727	0.513939	8.35931	0.238939	0.50238	0.621713	0.651727	0.298967
A0JLR7_MOUSE|A0JLR7_K296	Infected-Uninfected	-0.605041	0.296723	8.35931	0.0742683	0.228545	1.1292	0.605041	0.641028
A0JLR7_MOUSE|A0JLR7_K296	KO-WT	-0.749241	0.261685	8.35931	0.0201229	0.0490465	1.69631	0.749241	1.30939
A0JLR7_MOUSE|A0JLR7_K296	Early-Uninfected	-0.844032	0.331746	8.35931	0.0333184	0.175714	1.47732	0.844032	0.755193
A0JLR7_MOUSE|A0JLR7_K296	Late-Uninfected	-0.36605	0.331746	8.35931	0.300601	0.523532	0.522009	0.36605	0.281057
A0JLR7_MOUSE|A0JLR7_K332	KO_Early-WT_Early	-0.601161	0.260518	8.35931	0.0485362	0.14722	1.31393	0.601161	0.832032
A0JLR7_MOUSE|A0JLR7_K332	KO_Late-WT_Late	-0.642101	0.260518	8.35931	0.037805	0.143705	1.42245	0.642101	0.842528
A0JLR7_MOUSE|A0JLR7_K332	KO_Uninfected-WT_Uninfected	-0.262883	0.319068	8.35931	0.432869	0.63028	0.363643	0.262883	0.200466
A0JLR7_MOUSE|A0JLR7_K332	KO_Early-KO_Uninfected	-0.528484	0.260518	8.35931	0.0755063	0.394461	1.12202	0.528484	0.403996
A0JLR7_MOUSE|A0JLR7_K332	KO_Late-KO_Uninfected	-0.710435	0.260518	8.35931	0.024939	0.184404	1.60312	0.710435	0.73423
A0JLR7_MOUSE|A0JLR7_K332	WT_Early-Wt_Uninfected	-0.190205	0.319068	8.35931	0.566878	0.794027	0.24651	0.190205	0.100165
A0JLR7_MOUSE|A0JLR7_K332	WT_Late-Wt_Uninfected	-0.331216	0.319068	8.35931	0.328329	0.593013	0.483691	0.331216	0.226936
A0JLR7_MOUSE|A0JLR7_K332	Infected-Uninfected	-0.440085	0.184214	8.35931	0.0426423	0.164399	1.37016	0.440085	0.7841
A0JLR7_MOUSE|A0JLR7_K332	KO-WT	-0.502048	0.162462	8.35931	0.0141124	0.037594	1.8504	0.502048	1.42488
A0JLR7_MOUSE|A0JLR7_K332	Early-Uninfected	-0.359345	0.205958	8.35931	0.117561	0.359861	0.929736	0.359345	0.443865
A0JLR7_MOUSE|A0JLR7_K332	Late-Uninfected	-0.520826	0.205958	8.35931	0.0341441	0.140476	1.46668	0.520826	0.852399
A0JLR7_MOUSE|A0JLR7_K40	KO_Early-WT_Early	-0.73478	0.203306	19.3593	0.00180384	0.0186211	2.7438	0.73478	1.72999
A0JLR7_MOUSE|A0JLR7_K40	KO_Late-WT_Late	-0.387553	0.203306	19.3593	0.0715731	0.210866	1.14525	0.387553	0.675994
A0JLR7_MOUSE|A0JLR7_K40	KO_Uninfected-WT_Uninfected	-0.557748	0.234758	19.3593	0.0279725	0.134196	1.55327	0.557748	0.872261
A0JLR7_MOUSE|A0JLR7_K40	KO_Early-KO_Uninfected	-0.465385	0.219596	19.3593	0.0472078	0.325177	1.32599	0.465385	0.48788
A0JLR7_MOUSE|A0JLR7_K40	KO_Late-KO_Uninfected	-0.0601465	0.219596	19.3593	0.787065	0.926782	0.103989	0.0601465	0.0330223
A0JLR7_MOUSE|A0JLR7_K40	WT_Early-Wt_Uninfected	-0.288353	0.219596	19.3593	0.204499	0.485952	0.68931	0.288353	0.313407
A0JLR7_MOUSE|A0JLR7_K40	WT_Late-Wt_Uninfected	-0.230341	0.219596	19.3593	0.307128	0.571834	0.51268	0.230341	0.24273
A0JLR7_MOUSE|A0JLR7_K40	Infected-Uninfected	-0.261056	0.137639	19.3593	0.0728931	0.225582	1.13731	0.261056	0.646695
A0JLR7_MOUSE|A0JLR7_K40	KO-WT	-0.560027	0.123728	19.3593	0.000221408	0.00174938	3.65481	0.560027	2.75712
A0JLR7_MOUSE|A0JLR7_K40	Early-Uninfected	-0.376869	0.155278	19.3593	0.0251332	0.148377	1.59975	0.376869	0.828633
A0JLR7_MOUSE|A0JLR7_K40	Late-Uninfected	-0.145244	0.155278	19.3593	0.361114	0.582507	0.442356	0.145244	0.234699
A0JLR7_MOUSE|A0JLR7_K438	KO_Early-WT_Early	-0.43232	0.175589	8.35931	0.0379613	0.125894	1.42066	0.43232	0.899996
A0JLR7_MOUSE|A0JLR7_K438	KO_Late-WT_Late	-0.502033	0.175589	8.35931	0.0202501	0.097945	1.69357	0.502033	1.00902
A0JLR7_MOUSE|A0JLR7_K438	KO_Uninfected-WT_Uninfected	-0.505725	0.215052	8.35931	0.0452512	0.172519	1.34437	0.505725	0.763163
A0JLR7_MOUSE|A0JLR7_K438	KO_Early-KO_Uninfected	0.014553	0.175589	8.35931	0.935897	0.984189	0.0287721	0.014553	0.00692171
A0JLR7_MOUSE|A0JLR7_K438	KO_Late-KO_Uninfected	-0.140706	0.175589	8.35931	0.445114	0.74137	0.351529	0.140706	0.129965
A0JLR7_MOUSE|A0JLR7_K438	WT_Early-Wt_Uninfected	-0.0588516	0.215052	8.35931	0.790985	0.913872	0.101832	0.0588516	0.0391144
A0JLR7_MOUSE|A0JLR7_K438	WT_Late-Wt_Uninfected	-0.144398	0.215052	8.35931	0.520049	0.75044	0.283956	0.144398	0.124684
A0JLR7_MOUSE|A0JLR7_K438	Infected-Uninfected	-0.0823509	0.12416	8.35931	0.525027	0.724879	0.279818	0.0823509	0.139734
A0JLR7_MOUSE|A0JLR7_K438	KO-WT	-0.480026	0.109499	8.35931	0.00210271	0.00895337	2.67722	0.480026	2.04801
A0JLR7_MOUSE|A0JLR7_K438	Early-Uninfected	-0.0221493	0.138815	8.35931	0.877016	0.95323	0.0569924	0.0221493	0.0208024
A0JLR7_MOUSE|A0JLR7_K438	Late-Uninfected	-0.142552	0.138815	8.35931	0.333253	0.5535	0.477225	0.142552	0.256883
A0JLR7_MOUSE|A0JLR7_K51	KO_Early-WT_Early	-0.651908	0.15967	19.3593	0.000613507	0.00917059	3.21218	0.651908	2.0376
A0JLR7_MOUSE|A0JLR7_K51	KO_Late-WT_Late	-0.474821	0.15967	19.3593	0.00769124	0.0573591	2.114	0.474821	1.2414
A0JLR7_MOUSE|A0JLR7_K51	KO_Uninfected-WT_Uninfected	-0.0823625	0.184371	19.3593	0.660033	0.802887	0.180434	0.0823625	0.0953454
A0JLR7_MOUSE|A0JLR7_K51	KO_Early-KO_Uninfected	-0.162965	0.172463	19.3593	0.356342	0.733282	0.448133	0.162965	0.134729
A0JLR7_MOUSE|A0JLR7_K51	KO_Late-KO_Uninfected	-0.269453	0.172463	19.3593	0.134398	0.437765	0.871607	0.269453	0.358759
A0JLR7_MOUSE|A0JLR7_K51	WT_Early-Wt_Uninfected	0.406581	0.172463	19.3593	0.0290604	0.175152	1.5367	0.406581	0.756586
A0JLR7_MOUSE|A0JLR7_K51	WT_Late-Wt_Uninfected	0.123005	0.172463	19.3593	0.484216	0.727569	0.314961	0.123005	0.138126
A0JLR7_MOUSE|A0JLR7_K51	Infected-Uninfected	0.024292	0.108097	19.3593	0.824549	0.912282	0.0837836	0.024292	0.0398709
A0JLR7_MOUSE|A0JLR7_K51	KO-WT	-0.40303	0.097172	19.3593	0.000528504	0.00327356	3.27695	0.40303	2.48498
A0JLR7_MOUSE|A0JLR7_K51	Early-Uninfected	0.121808	0.12195	19.3593	0.330196	0.613333	0.481228	0.121808	0.212304
A0JLR7_MOUSE|A0JLR7_K51	Late-Uninfected	-0.0732239	0.12195	19.3593	0.555176	0.740235	0.255569	0.0732239	0.130631
A0JLR7_MOUSE|A0JLR7_K547	KO_Early-WT_Early	-0.636314	0.169246	8.35931	0.00512298	0.0351446	2.29048	0.636314	1.45414
A0JLR7_MOUSE|A0JLR7_K547	KO_Late-WT_Late	-0.559928	0.169246	8.35931	0.0100849	0.0669203	1.99633	0.559928	1.17444
A0JLR7_MOUSE|A0JLR7_K547	KO_Uninfected-WT_Uninfected	-0.429177	0.207283	8.35931	0.0706779	0.219746	1.15072	0.429177	0.658079
A0JLR7_MOUSE|A0JLR7_K547	KO_Early-KO_Uninfected	-0.260804	0.169246	8.35931	0.160277	0.545945	0.795129	0.260804	0.262851
A0JLR7_MOUSE|A0JLR7_K547	KO_Late-KO_Uninfected	-0.426849	0.169246	8.35931	0.0345115	0.220542	1.46204	0.426849	0.656509
A0JLR7_MOUSE|A0JLR7_K547	WT_Early-Wt_Uninfected	-0.0536669	0.207283	8.35931	0.801969	0.92043	0.0958422	0.0536669	0.0360092
A0JLR7_MOUSE|A0JLR7_K547	WT_Late-Wt_Uninfected	-0.296098	0.207283	8.35931	0.189436	0.444932	0.722537	0.296098	0.351707
A0JLR7_MOUSE|A0JLR7_K547	Infected-Uninfected	-0.259354	0.119675	8.35931	0.0606548	0.2019	1.21713	0.259354	0.694863
A0JLR7_MOUSE|A0JLR7_K547	KO-WT	-0.541806	0.105543	8.35931	0.000777763	0.00433682	3.10915	0.541806	2.36283
A0JLR7_MOUSE|A0JLR7_K547	Early-Uninfected	-0.157236	0.133801	8.35931	0.272321	0.558881	0.564919	0.157236	0.25268
A0JLR7_MOUSE|A0JLR7_K547	Late-Uninfected	-0.361473	0.133801	8.35931	0.0259621	0.116921	1.58566	0.361473	0.932108
A0JLR7_MOUSE|A0JLR7_K56	KO_Early-WT_Early	-0.447952	0.188575	19.3593	0.0279951	0.102037	1.55292	0.447952	0.991243
A0JLR7_MOUSE|A0JLR7_K56	KO_Late-WT_Late	-0.398011	0.188575	19.3593	0.0480291	0.167041	1.3185	0.398011	0.777177
A0JLR7_MOUSE|A0JLR7_K56	KO_Uninfected-WT_Uninfected	-0.711942	0.217748	19.3593	0.00395841	0.0441042	2.40248	0.711942	1.35552
A0JLR7_MOUSE|A0JLR7_K56	KO_Early-KO_Uninfected	0.102012	0.203684	19.3593	0.622133	0.878856	0.206117	0.102012	0.056082
A0JLR7_MOUSE|A0JLR7_K56	KO_Late-KO_Uninfected	-0.0762445	0.203684	19.3593	0.71223	0.89609	0.14738	0.0762445	0.0476483
A0JLR7_MOUSE|A0JLR7_K56	WT_Early-Wt_Uninfected	-0.161977	0.203684	19.3593	0.436117	0.704927	0.360397	0.161977	0.151856
A0JLR7_MOUSE|A0JLR7_K56	WT_Late-Wt_Uninfected	-0.390175	0.203684	19.3593	0.0703071	0.258745	1.153	0.390175	0.587127
A0JLR7_MOUSE|A0JLR7_K56	Infected-Uninfected	-0.131596	0.127666	19.3593	0.315348	0.544642	0.501209	0.131596	0.263889
A0JLR7_MOUSE|A0JLR7_K56	KO-WT	-0.519302	0.114763	19.3593	0.000222057	0.0017505	3.65353	0.519302	2.75684
A0JLR7_MOUSE|A0JLR7_K56	Early-Uninfected	-0.0299825	0.144027	19.3593	0.837268	0.935775	0.0771356	0.0299825	0.0288284
A0JLR7_MOUSE|A0JLR7_K56	Late-Uninfected	-0.23321	0.144027	19.3593	0.121578	0.310036	0.915146	0.23321	0.508587
A0JLR7_MOUSE|A0JLR7_K561	KO_Early-WT_Early	-0.429851	0.122497	19.3593	0.00229472	0.0215535	2.63927	0.429851	1.66648
A0JLR7_MOUSE|A0JLR7_K561	KO_Late-WT_Late	-0.494346	0.122497	19.3593	0.00068412	0.0135112	3.16487	0.494346	1.86931
A0JLR7_MOUSE|A0JLR7_K561	KO_Uninfected-WT_Uninfected	-0.16523	0.141448	19.3593	0.256939	0.465008	0.590169	0.16523	0.33254
A0JLR7_MOUSE|A0JLR7_K561	KO_Early-KO_Uninfected	-0.185039	0.132312	19.3593	0.177779	0.570929	0.750119	0.185039	0.243418
A0JLR7_MOUSE|A0JLR7_K561	KO_Late-KO_Uninfected	-0.144924	0.132312	19.3593	0.286817	0.621842	0.542396	0.144924	0.20632
A0JLR7_MOUSE|A0JLR7_K561	WT_Early-Wt_Uninfected	0.0795825	0.132312	19.3593	0.554503	0.785486	0.256096	0.0795825	0.104862
A0JLR7_MOUSE|A0JLR7_K561	WT_Late-Wt_Uninfected	0.184192	0.132312	19.3593	0.179679	0.432161	0.745503	0.184192	0.364355
A0JLR7_MOUSE|A0JLR7_K561	Infected-Uninfected	-0.0165471	0.0829312	19.3593	0.843931	0.92443	0.0736932	0.0165471	0.0341261
A0JLR7_MOUSE|A0JLR7_K561	KO-WT	-0.363142	0.0745496	19.3593	0.000100875	0.00100209	3.99622	0.363142	2.99909
A0JLR7_MOUSE|A0JLR7_K561	Early-Uninfected	-0.0527281	0.093559	19.3593	0.57951	0.803274	0.236939	0.0527281	0.0951364
A0JLR7_MOUSE|A0JLR7_K561	Late-Uninfected	0.0196339	0.093559	19.3593	0.835973	0.916989	0.0778078	0.0196339	0.0376358
A0JLR7_MOUSE|A0JLR7_K566	KO_Early-WT_Early	-0.769922	0.164198	8.35931	0.00138889	0.015479	2.85733	0.769922	1.81026
A0JLR7_MOUSE|A0JLR7_K566	KO_Late-WT_Late	-0.438062	0.164198	8.35931	0.027384	0.118325	1.5625	0.438062	0.926924
A0JLR7_MOUSE|A0JLR7_K566	KO_Uninfected-WT_Uninfected	-0.470373	0.201101	8.35931	0.0461705	0.173887	1.33564	0.470373	0.759732
A0JLR7_MOUSE|A0JLR7_K566	KO_Early-KO_Uninfected	-0.356021	0.164198	8.35931	0.0605505	0.359681	1.21788	0.356021	0.444082
A0JLR7_MOUSE|A0JLR7_K566	KO_Late-KO_Uninfected	-0.145699	0.164198	8.35931	0.399705	0.712343	0.39826	0.145699	0.147311
A0JLR7_MOUSE|A0JLR7_K566	WT_Early-Wt_Uninfected	-0.0564722	0.201101	8.35931	0.785677	0.912101	0.104756	0.0564722	0.0399571
A0JLR7_MOUSE|A0JLR7_K566	WT_Late-Wt_Uninfected	-0.178011	0.201101	8.35931	0.400803	0.659759	0.397069	0.178011	0.180614
A0JLR7_MOUSE|A0JLR7_K566	Infected-Uninfected	-0.184051	0.116105	8.35931	0.149959	0.352975	0.824027	0.184051	0.452257
A0JLR7_MOUSE|A0JLR7_K566	KO-WT	-0.559452	0.102395	8.35931	0.000514896	0.00321441	3.28828	0.559452	2.4929
A0JLR7_MOUSE|A0JLR7_K566	Early-Uninfected	-0.206247	0.12981	8.35931	0.149139	0.411273	0.82641	0.206247	0.38587
A0JLR7_MOUSE|A0JLR7_K566	Late-Uninfected	-0.161855	0.12981	8.35931	0.246251	0.463595	0.608622	0.161855	0.333861
A0JLR7_MOUSE|A0JLR7_K591	KO_Early-WT_Early	-0.324505	0.161214	19.3593	0.0582449	0.165897	1.23474	0.324505	0.78016
A0JLR7_MOUSE|A0JLR7_K591	KO_Late-WT_Late	-0.38738	0.161214	19.3593	0.0264375	0.115361	1.57778	0.38738	0.937939
A0JLR7_MOUSE|A0JLR7_K591	KO_Uninfected-WT_Uninfected	-0.369817	0.186153	19.3593	0.0613038	0.203691	1.21251	0.369817	0.691029
A0JLR7_MOUSE|A0JLR7_K591	KO_Early-KO_Uninfected	-0.382068	0.174131	19.3593	0.0406167	0.301605	1.3913	0.382068	0.520562
A0JLR7_MOUSE|A0JLR7_K591	KO_Late-KO_Uninfected	-0.131319	0.174131	19.3593	0.45984	0.751145	0.337393	0.131319	0.124276
A0JLR7_MOUSE|A0JLR7_K591	WT_Early-Wt_Uninfected	-0.42738	0.174131	19.3593	0.0237321	0.157673	1.62466	0.42738	0.802242
A0JLR7_MOUSE|A0JLR7_K591	WT_Late-Wt_Uninfected	-0.113756	0.174131	19.3593	0.521261	0.750882	0.282945	0.113756	0.124429
A0JLR7_MOUSE|A0JLR7_K591	Infected-Uninfected	-0.263631	0.109142	19.3593	0.0257508	0.118419	1.58921	0.263631	0.926579
A0JLR7_MOUSE|A0JLR7_K591	KO-WT	-0.360567	0.0981115	19.3593	0.00156845	0.00723553	2.80453	0.360567	2.14053
A0JLR7_MOUSE|A0JLR7_K591	Early-Uninfected	-0.404724	0.123129	19.3593	0.00380519	0.0432565	2.41962	0.404724	1.36395
A0JLR7_MOUSE|A0JLR7_K591	Late-Uninfected	-0.122537	0.123129	19.3593	0.331919	0.552222	0.478969	0.122537	0.257887
A0JLR7_MOUSE|A0JLR7_K609	KO_Early-WT_Early	-0.623561	0.158352	8.35931	0.00395075	0.0299844	2.40332	0.623561	1.5231
A0JLR7_MOUSE|A0JLR7_K609	KO_Late-WT_Late	-0.51715	0.158352	8.35931	0.0107635	0.0691783	1.96805	0.51715	1.16003
A0JLR7_MOUSE|A0JLR7_K609	KO_Uninfected-WT_Uninfected	-0.448951	0.19394	8.35931	0.0479739	0.177285	1.319	0.448951	0.751328
A0JLR7_MOUSE|A0JLR7_K609	KO_Early-KO_Uninfected	-0.184858	0.158352	8.35931	0.275271	0.669419	0.560239	0.184858	0.174302
A0JLR7_MOUSE|A0JLR7_K609	KO_Late-KO_Uninfected	-0.153318	0.158352	8.35931	0.360114	0.682557	0.443561	0.153318	0.165861
A0JLR7_MOUSE|A0JLR7_K609	WT_Early-Wt_Uninfected	-0.010248	0.19394	8.35931	0.9591	0.985516	0.0181363	0.010248	0.00633653
A0JLR7_MOUSE|A0JLR7_K609	WT_Late-Wt_Uninfected	-0.0851186	0.19394	8.35931	0.671864	0.844453	0.172718	0.0851186	0.0734247
A0JLR7_MOUSE|A0JLR7_K609	Infected-Uninfected	-0.108386	0.111971	8.35931	0.360225	0.586928	0.443426	0.108386	0.231415
A0JLR7_MOUSE|A0JLR7_K609	KO-WT	-0.529887	0.0987496	8.35931	0.000580799	0.00352058	3.23597	0.529887	2.45339
A0JLR7_MOUSE|A0JLR7_K609	Early-Uninfected	-0.0975531	0.125188	8.35931	0.457323	0.718328	0.339777	0.0975531	0.143677
A0JLR7_MOUSE|A0JLR7_K609	Late-Uninfected	-0.119218	0.125188	8.35931	0.367659	0.587611	0.434555	0.119218	0.23091
A0JLR7_MOUSE|A0JLR7_K635	KO_Early-WT_Early	-0.508886	0.21773	8.35931	0.0462994	0.143134	1.33442	0.508886	0.844258
A0JLR7_MOUSE|A0JLR7_K635	KO_Late-WT_Late	-0.445867	0.21773	8.35931	0.0732535	0.21348	1.13517	0.445867	0.670642
A0JLR7_MOUSE|A0JLR7_K635	KO_Uninfected-WT_Uninfected	-0.187585	0.266663	8.35931	0.500895	0.685164	0.300253	0.187585	0.164205
A0JLR7_MOUSE|A0JLR7_K635	KO_Early-KO_Uninfected	-0.389428	0.21773	8.35931	0.109869	0.466351	0.959127	0.389428	0.331287
A0JLR7_MOUSE|A0JLR7_K635	KO_Late-KO_Uninfected	-0.417773	0.21773	8.35931	0.089718	0.358378	1.04712	0.417773	0.445659
A0JLR7_MOUSE|A0JLR7_K635	WT_Early-Wt_Uninfected	-0.0681267	0.266663	8.35931	0.804528	0.922475	0.0944589	0.0681267	0.0350455
A0JLR7_MOUSE|A0JLR7_K635	WT_Late-Wt_Uninfected	-0.15949	0.266663	8.35931	0.565624	0.781331	0.247472	0.15949	0.107165
A0JLR7_MOUSE|A0JLR7_K635	Infected-Uninfected	-0.258704	0.153958	8.35931	0.129772	0.324573	0.886818	0.258704	0.488687
A0JLR7_MOUSE|A0JLR7_K635	KO-WT	-0.380779	0.135778	8.35931	0.022071	0.0528346	1.65618	0.380779	1.27708
A0JLR7_MOUSE|A0JLR7_K635	Early-Uninfected	-0.228777	0.17213	8.35931	0.218948	0.502027	0.65966	0.228777	0.299273
A0JLR7_MOUSE|A0JLR7_K635	Late-Uninfected	-0.288632	0.17213	8.35931	0.130476	0.323329	0.884471	0.288632	0.490355
A0JLR7_MOUSE|A0JLR7_K640	KO_Early-WT_Early	-0.522577	0.189538	19.3593	0.0123966	0.0608586	1.9067	0.522577	1.21568
A0JLR7_MOUSE|A0JLR7_K640	KO_Late-WT_Late	-0.502837	0.189538	19.3593	0.0155398	0.0840326	1.80856	0.502837	1.07555
A0JLR7_MOUSE|A0JLR7_K640	KO_Uninfected-WT_Uninfected	-0.571815	0.21886	19.3593	0.0169466	0.0999875	1.77092	0.571815	1.00005
A0JLR7_MOUSE|A0JLR7_K640	KO_Early-KO_Uninfected	0.123652	0.204725	19.3593	0.552862	0.845689	0.257383	0.123652	0.0727892
A0JLR7_MOUSE|A0JLR7_K640	KO_Late-KO_Uninfected	0.102494	0.204725	19.3593	0.622267	0.848684	0.206023	0.102494	0.0712541
A0JLR7_MOUSE|A0JLR7_K640	WT_Early-Wt_Uninfected	0.0744151	0.204725	19.3593	0.720179	0.88368	0.142559	0.0744151	0.053705
A0JLR7_MOUSE|A0JLR7_K640	WT_Late-Wt_Uninfected	0.0335159	0.204725	19.3593	0.871655	0.946297	0.0596553	0.0335159	0.0239725
A0JLR7_MOUSE|A0JLR7_K640	Infected-Uninfected	0.0835193	0.128318	19.3593	0.522777	0.722455	0.281683	0.0835193	0.141189
A0JLR7_MOUSE|A0JLR7_K640	KO-WT	-0.532409	0.115349	19.3593	0.000180477	0.00150623	3.74358	0.532409	2.82211
A0JLR7_MOUSE|A0JLR7_K640	Early-Uninfected	0.0990336	0.144762	19.3593	0.502012	0.75133	0.299286	0.0990336	0.12417
A0JLR7_MOUSE|A0JLR7_K640	Late-Uninfected	0.0680049	0.144762	19.3593	0.643768	0.803886	0.19127	0.0680049	0.0948058
A0JLR7_MOUSE|A0JLR7_K655	KO_Early-WT_Early	-0.411811	0.202273	19.3593	0.0556762	0.160865	1.25433	0.411811	0.793539
A0JLR7_MOUSE|A0JLR7_K655	KO_Late-WT_Late	-0.459955	0.202273	19.3593	0.0345274	0.135983	1.46184	0.459955	0.866514
A0JLR7_MOUSE|A0JLR7_K655	KO_Uninfected-WT_Uninfected	-0.233519	0.233565	19.3593	0.329739	0.537844	0.481829	0.233519	0.269344
A0JLR7_MOUSE|A0JLR7_K655	KO_Early-KO_Uninfected	-0.288794	0.21848	19.3593	0.201631	0.595735	0.695443	0.288794	0.224947
A0JLR7_MOUSE|A0JLR7_K655	KO_Late-KO_Uninfected	-0.224568	0.21848	19.3593	0.316685	0.64647	0.499373	0.224568	0.189452
A0JLR7_MOUSE|A0JLR7_K655	WT_Early-Wt_Uninfected	-0.110502	0.21848	19.3593	0.618724	0.826684	0.208503	0.110502	0.0826603
A0JLR7_MOUSE|A0JLR7_K655	WT_Late-Wt_Uninfected	0.00186804	0.21848	19.3593	0.993266	0.99781	0.00293465	0.00186804	0.00095195
A0JLR7_MOUSE|A0JLR7_K655	Infected-Uninfected	-0.155499	0.136939	19.3593	0.270016	0.497354	0.568611	0.155499	0.303334
A0JLR7_MOUSE|A0JLR7_K655	KO-WT	-0.368428	0.123099	19.3593	0.0073701	0.0228934	2.13253	0.368428	1.64029
A0JLR7_MOUSE|A0JLR7_K655	Early-Uninfected	-0.199648	0.154488	19.3593	0.211461	0.493063	0.67477	0.199648	0.307098
A0JLR7_MOUSE|A0JLR7_K655	Late-Uninfected	-0.11135	0.154488	19.3593	0.479668	0.685087	0.319059	0.11135	0.164255
A0JLR7_MOUSE|A0JLR7_K672	KO_Early-WT_Early	-0.103971	0.289029	8.35931	0.727971	0.833018	0.137886	0.103971	0.0793459
A0JLR7_MOUSE|A0JLR7_K672	KO_Late-WT_Late	-0.431993	0.289029	8.35931	0.171766	0.35882	0.765062	0.431993	0.445124
A0JLR7_MOUSE|A0JLR7_K672	KO_Uninfected-WT_Uninfected	-1.04367	0.353986	8.35931	0.0176064	0.102446	1.75433	1.04367	0.989503
A0JLR7_MOUSE|A0JLR7_K672	KO_Early-KO_Uninfected	0.495419	0.289029	8.35931	0.123238	0.49127	0.909256	0.495419	0.308679
A0JLR7_MOUSE|A0JLR7_K672	KO_Late-KO_Uninfected	0.439665	0.289029	8.35931	0.165098	0.482065	0.782257	0.439665	0.316894
A0JLR7_MOUSE|A0JLR7_K672	WT_Early-Wt_Uninfected	-0.444278	0.353986	8.35931	0.243403	0.530083	0.613675	0.444278	0.275656
A0JLR7_MOUSE|A0JLR7_K672	WT_Late-Wt_Uninfected	-0.17201	0.353986	8.35931	0.639505	0.825736	0.194156	0.17201	0.0831586
A0JLR7_MOUSE|A0JLR7_K672	Infected-Uninfected	0.079699	0.204374	8.35931	0.70631	0.844568	0.151005	0.079699	0.0733655
A0JLR7_MOUSE|A0JLR7_K672	KO-WT	-0.526544	0.180241	8.35931	0.0183667	0.0457023	1.73597	0.526544	1.34006
A0JLR7_MOUSE|A0JLR7_K672	Early-Uninfected	0.0255703	0.228497	8.35931	0.913538	0.966689	0.0392732	0.0255703	0.0147132
A0JLR7_MOUSE|A0JLR7_K672	Late-Uninfected	0.133828	0.228497	8.35931	0.573555	0.754827	0.241425	0.133828	0.122153
A0JLR7_MOUSE|A0JLR7_K678	KO_Early-WT_Early	-0.109562	0.206794	19.3593	0.602264	0.739298	0.220213	0.109562	0.13118
A0JLR7_MOUSE|A0JLR7_K678	KO_Late-WT_Late	0.0157868	0.206794	19.3593	0.939931	0.968341	0.0269039	0.0157868	0.0139715
A0JLR7_MOUSE|A0JLR7_K678	KO_Uninfected-WT_Uninfected	-0.367879	0.238785	19.3593	0.139593	0.327425	0.855135	0.367879	0.484888
A0JLR7_MOUSE|A0JLR7_K678	KO_Early-KO_Uninfected	0.285975	0.223363	19.3593	0.215562	0.610968	0.666428	0.285975	0.213981
A0JLR7_MOUSE|A0JLR7_K678	KO_Late-KO_Uninfected	0.0629415	0.223363	19.3593	0.781094	0.924302	0.107297	0.0629415	0.0341859
A0JLR7_MOUSE|A0JLR7_K678	WT_Early-Wt_Uninfected	0.0276582	0.223363	19.3593	0.902729	0.965585	0.0444424	0.0276582	0.0152093
A0JLR7_MOUSE|A0JLR7_K678	WT_Late-Wt_Uninfected	-0.320725	0.223363	19.3593	0.166995	0.416846	0.777296	0.320725	0.380024
A0JLR7_MOUSE|A0JLR7_K678	Infected-Uninfected	0.0139626	0.14	19.3593	0.921582	0.962497	0.0354659	0.0139626	0.0166007
A0JLR7_MOUSE|A0JLR7_K678	KO-WT	-0.153885	0.125851	19.3593	0.236098	0.338152	0.626907	0.153885	0.470888
A0JLR7_MOUSE|A0JLR7_K678	Early-Uninfected	0.156817	0.157941	19.3593	0.333017	0.615677	0.477533	0.156817	0.210647
A0JLR7_MOUSE|A0JLR7_K678	Late-Uninfected	-0.128892	0.157941	19.3593	0.424386	0.636797	0.372239	0.128892	0.195999
A0JLR7_MOUSE|A0JLR7_K688	KO_Early-WT_Early	-0.284783	0.332918	19.3593	0.402785	0.572346	0.394927	0.284783	0.242342
A0JLR7_MOUSE|A0JLR7_K688	KO_Late-WT_Late	-0.0672866	0.332918	19.3593	0.841938	0.918511	0.0747197	0.0672866	0.0369158
A0JLR7_MOUSE|A0JLR7_K688	KO_Uninfected-WT_Uninfected	0.132822	0.384421	19.3593	0.733435	0.852923	0.134638	0.132822	0.0690903
A0JLR7_MOUSE|A0JLR7_K688	KO_Early-KO_Uninfected	-0.255342	0.359593	19.3593	0.486116	0.814364	0.31326	0.255342	0.0891815
A0JLR7_MOUSE|A0JLR7_K688	KO_Late-KO_Uninfected	0.909713	0.359593	19.3593	0.0202293	0.164461	1.69402	0.909713	0.783937
A0JLR7_MOUSE|A0JLR7_K688	WT_Early-Wt_Uninfected	0.162263	0.359593	19.3593	0.656829	0.84819	0.182547	0.162263	0.0715067
A0JLR7_MOUSE|A0JLR7_K688	WT_Late-Wt_Uninfected	1.10982	0.359593	19.3593	0.0059822	0.0578487	2.22314	1.10982	1.23771
A0JLR7_MOUSE|A0JLR7_K688	Infected-Uninfected	0.481614	0.225387	19.3593	0.0455807	0.171086	1.34122	0.481614	0.766785
A0JLR7_MOUSE|A0JLR7_K688	KO-WT	-0.0730825	0.202608	19.3593	0.722222	0.796055	0.141329	0.0730825	0.0990569
A0JLR7_MOUSE|A0JLR7_K688	Early-Uninfected	-0.0465394	0.25427	19.3593	0.856677	0.94397	0.067183	0.0465394	0.0250419
A0JLR7_MOUSE|A0JLR7_K688	Late-Uninfected	1.00977	0.25427	19.3593	0.000793416	0.0097108	3.1005	1.00977	2.01275
A0JLR7_MOUSE|A0JLR7_K695	KO_Early-WT_Early	-0.925385	0.181379	19.3593	5.99049e-05	0.00207056	4.22254	0.925385	2.68391
A0JLR7_MOUSE|A0JLR7_K695	KO_Late-WT_Late	-0.748844	0.181379	19.3593	0.000552109	0.0120345	3.25798	0.748844	1.91957
A0JLR7_MOUSE|A0JLR7_K695	KO_Uninfected-WT_Uninfected	-0.490489	0.209438	19.3593	0.0300135	0.139676	1.52268	0.490489	0.854878
A0JLR7_MOUSE|A0JLR7_K695	KO_Early-KO_Uninfected	0.177542	0.195911	19.3593	0.375952	0.746219	0.424868	0.177542	0.127134
A0JLR7_MOUSE|A0JLR7_K695	KO_Late-KO_Uninfected	-0.0108119	0.195911	19.3593	0.956555	0.990082	0.0192903	0.0108119	0.00432886
A0JLR7_MOUSE|A0JLR7_K695	WT_Early-Wt_Uninfected	0.612438	0.195911	19.3593	0.00547143	0.0667136	2.2619	0.612438	1.17579
A0JLR7_MOUSE|A0JLR7_K695	WT_Late-Wt_Uninfected	0.247543	0.195911	19.3593	0.221398	0.481838	0.654827	0.247543	0.317099
A0JLR7_MOUSE|A0JLR7_K695	Infected-Uninfected	0.256678	0.122794	19.3593	0.0500082	0.181706	1.30096	0.256678	0.740631
A0JLR7_MOUSE|A0JLR7_K695	KO-WT	-0.721573	0.110383	19.3593	2.6666e-06	6.39727e-05	5.57404	0.721573	4.19401
A0JLR7_MOUSE|A0JLR7_K695	Early-Uninfected	0.39499	0.13853	19.3593	0.0100848	0.0830219	1.99633	0.39499	1.08081
A0JLR7_MOUSE|A0JLR7_K695	Late-Uninfected	0.118366	0.13853	19.3593	0.403312	0.618045	0.394359	0.118366	0.20898
A0JLR7_MOUSE|A0JLR7_K704	KO_Early-WT_Early	-0.42174	0.232622	19.3593	0.0853699	0.209755	1.06869	0.42174	0.678288
A0JLR7_MOUSE|A0JLR7_K704	KO_Late-WT_Late	-0.506531	0.232622	19.3593	0.042006	0.15263	1.37669	0.506531	0.816361
A0JLR7_MOUSE|A0JLR7_K704	KO_Uninfected-WT_Uninfected	-0.684321	0.268608	19.3593	0.0194766	0.108963	1.71049	0.684321	0.96272
A0JLR7_MOUSE|A0JLR7_K704	KO_Early-KO_Uninfected	0.0844856	0.25126	19.3593	0.740301	0.926254	0.130592	0.0844856	0.0332697
A0JLR7_MOUSE|A0JLR7_K704	KO_Late-KO_Uninfected	-0.124784	0.25126	19.3593	0.625041	0.85083	0.204092	0.124784	0.0701571
A0JLR7_MOUSE|A0JLR7_K704	WT_Early-Wt_Uninfected	-0.178095	0.25126	19.3593	0.486892	0.738897	0.312568	0.178095	0.131416
A0JLR7_MOUSE|A0JLR7_K704	WT_Late-Wt_Uninfected	-0.302574	0.25126	19.3593	0.24302	0.507165	0.614359	0.302574	0.294851
A0JLR7_MOUSE|A0JLR7_K704	Infected-Uninfected	-0.130242	0.157486	19.3593	0.41831	0.639305	0.378502	0.130242	0.194292
A0JLR7_MOUSE|A0JLR7_K704	KO-WT	-0.537531	0.141569	19.3593	0.0011852	0.00592137	2.92621	0.537531	2.22758
A0JLR7_MOUSE|A0JLR7_K704	Early-Uninfected	-0.0468048	0.177668	19.3593	0.794995	0.914549	0.0996357	0.0468048	0.038793
A0JLR7_MOUSE|A0JLR7_K704	Late-Uninfected	-0.213679	0.177668	19.3593	0.243601	0.46047	0.613322	0.213679	0.336799
A0JLR7_MOUSE|A0JLR7_K706	KO_Early-WT_Early	-0.550296	0.107599	19.3593	5.82653e-05	0.00205303	4.23459	0.550296	2.68761
A0JLR7_MOUSE|A0JLR7_K706	KO_Late-WT_Late	-0.453413	0.107599	19.3593	0.00045368	0.0107863	3.34325	0.453413	1.96713
A0JLR7_MOUSE|A0JLR7_K706	KO_Uninfected-WT_Uninfected	-0.460995	0.124245	19.3593	0.00144631	0.0232768	2.83974	0.460995	1.63308
A0JLR7_MOUSE|A0JLR7_K706	KO_Early-KO_Uninfected	-0.189184	0.116221	19.3593	0.119733	0.48455	0.921787	0.189184	0.314662
A0JLR7_MOUSE|A0JLR7_K706	KO_Late-KO_Uninfected	-0.051583	0.116221	19.3593	0.662082	0.869907	0.179088	0.051583	0.0605272
A0JLR7_MOUSE|A0JLR7_K706	WT_Early-Wt_Uninfected	-0.0998836	0.116221	19.3593	0.40062	0.677718	0.397267	0.0998836	0.168951
A0JLR7_MOUSE|A0JLR7_K706	WT_Late-Wt_Uninfected	-0.0591652	0.116221	19.3593	0.616452	0.812538	0.210101	0.0591652	0.0901565
A0JLR7_MOUSE|A0JLR7_K706	Infected-Uninfected	-0.099954	0.0728451	19.3593	0.18571	0.399417	0.731165	0.099954	0.398574
A0JLR7_MOUSE|A0JLR7_K706	KO-WT	-0.488235	0.0654829	19.3593	4.17297e-07	1.50876e-05	6.37955	0.488235	4.82138
A0JLR7_MOUSE|A0JLR7_K706	Early-Uninfected	-0.144534	0.0821804	19.3593	0.0944195	0.319975	1.02494	0.144534	0.494884
A0JLR7_MOUSE|A0JLR7_K706	Late-Uninfected	-0.0553741	0.0821804	19.3593	0.508397	0.70695	0.293797	0.0553741	0.150611
A0JLR7_MOUSE|A0JLR7_K71	KO_Early-WT_Early	-0.311142	0.220933	19.3593	0.174897	0.334963	0.757217	0.311142	0.475003
A0JLR7_MOUSE|A0JLR7_K71	KO_Late-WT_Late	-0.337786	0.220933	19.3593	0.142463	0.318898	0.846297	0.337786	0.496348
A0JLR7_MOUSE|A0JLR7_K71	KO_Uninfected-WT_Uninfected	-0.557995	0.255111	19.3593	0.0411858	0.163608	1.38525	0.557995	0.786196
A0JLR7_MOUSE|A0JLR7_K71	KO_Early-KO_Uninfected	0.0491624	0.238635	19.3593	0.83893	0.953385	0.0762741	0.0491624	0.0207317
A0JLR7_MOUSE|A0JLR7_K71	KO_Late-KO_Uninfected	-0.0913305	0.238635	19.3593	0.706097	0.893427	0.151136	0.0913305	0.0489409
A0JLR7_MOUSE|A0JLR7_K71	WT_Early-Wt_Uninfected	-0.197691	0.238635	19.3593	0.417526	0.692376	0.379316	0.197691	0.159658
A0JLR7_MOUSE|A0JLR7_K71	WT_Late-Wt_Uninfected	-0.31154	0.238635	19.3593	0.207022	0.465504	0.683983	0.31154	0.332076
A0JLR7_MOUSE|A0JLR7_K71	Infected-Uninfected	-0.13785	0.149572	19.3593	0.368067	0.593548	0.434073	0.13785	0.226544
A0JLR7_MOUSE|A0JLR7_K71	KO-WT	-0.402308	0.134456	19.3593	0.00738338	0.0229277	2.13174	0.402308	1.63964
A0JLR7_MOUSE|A0JLR7_K71	Early-Uninfected	-0.0742644	0.16874	19.3593	0.664731	0.85273	0.177354	0.0742644	0.0691886
A0JLR7_MOUSE|A0JLR7_K71	Late-Uninfected	-0.201435	0.16874	19.3593	0.246996	0.464058	0.60731	0.201435	0.333427
A0JLR7_MOUSE|A0JLR7_K729	KO_Early-WT_Early	-0.364456	0.106437	19.3593	0.00278575	0.0241126	2.55506	0.364456	1.61776
A0JLR7_MOUSE|A0JLR7_K729	KO_Late-WT_Late	-0.381803	0.106437	19.3593	0.00191919	0.02465	2.71688	0.381803	1.60818
A0JLR7_MOUSE|A0JLR7_K729	KO_Uninfected-WT_Uninfected	-0.340832	0.122903	19.3593	0.0119691	0.0826487	1.92194	0.340832	1.08276
A0JLR7_MOUSE|A0JLR7_K729	KO_Early-KO_Uninfected	-0.0515174	0.114965	19.3593	0.659047	0.891891	0.181084	0.0515174	0.0496882
A0JLR7_MOUSE|A0JLR7_K729	KO_Late-KO_Uninfected	-0.129515	0.114965	19.3593	0.273701	0.609645	0.562724	0.129515	0.214923
A0JLR7_MOUSE|A0JLR7_K729	WT_Early-Wt_Uninfected	-0.0278934	0.114965	19.3593	0.810848	0.926089	0.0910603	0.0278934	0.0333473
A0JLR7_MOUSE|A0JLR7_K729	WT_Late-Wt_Uninfected	-0.088545	0.114965	19.3593	0.450485	0.700763	0.346319	0.088545	0.154429
A0JLR7_MOUSE|A0JLR7_K729	Infected-Uninfected	-0.0743677	0.0720584	19.3593	0.314771	0.543952	0.502005	0.0743677	0.264439
A0JLR7_MOUSE|A0JLR7_K729	KO-WT	-0.362364	0.0647756	19.3593	2.00549e-05	0.000293985	4.69778	0.362364	3.53167
A0JLR7_MOUSE|A0JLR7_K729	Early-Uninfected	-0.0397054	0.0812928	19.3593	0.630736	0.836847	0.200152	0.0397054	0.0773539
A0JLR7_MOUSE|A0JLR7_K729	Late-Uninfected	-0.10903	0.0812928	19.3593	0.195379	0.406243	0.709122	0.10903	0.391215
A0JLR7_MOUSE|A0JLR7_K762	KO_Early-WT_Early	-0.377883	0.173276	19.3593	0.0417258	0.133907	1.3796	0.377883	0.873195
A0JLR7_MOUSE|A0JLR7_K762	KO_Late-WT_Late	-0.478462	0.173276	19.3593	0.0122845	0.0735689	1.91064	0.478462	1.13331
A0JLR7_MOUSE|A0JLR7_K762	KO_Uninfected-WT_Uninfected	-0.538476	0.200082	19.3593	0.0143042	0.0907684	1.84454	0.538476	1.04207
A0JLR7_MOUSE|A0JLR7_K762	KO_Early-KO_Uninfected	0.0111185	0.18716	19.3593	0.953237	0.988228	0.020799	0.0111185	0.00514279
A0JLR7_MOUSE|A0JLR7_K762	KO_Late-KO_Uninfected	-0.0538265	0.18716	19.3593	0.776712	0.923175	0.10974	0.0538265	0.0347162
A0JLR7_MOUSE|A0JLR7_K762	WT_Early-Wt_Uninfected	-0.149475	0.18716	19.3593	0.434184	0.703247	0.362326	0.149475	0.152892
A0JLR7_MOUSE|A0JLR7_K762	WT_Late-Wt_Uninfected	-0.11384	0.18716	19.3593	0.550093	0.771911	0.259564	0.11384	0.112433
A0JLR7_MOUSE|A0JLR7_K762	Infected-Uninfected	-0.0765056	0.117309	19.3593	0.521958	0.721908	0.282364	0.0765056	0.141518
A0JLR7_MOUSE|A0JLR7_K762	KO-WT	-0.46494	0.105453	19.3593	0.000289712	0.00211345	3.53803	0.46494	2.67501
A0JLR7_MOUSE|A0JLR7_K762	Early-Uninfected	-0.0691781	0.132342	19.3593	0.607099	0.819856	0.21674	0.0691781	0.0862623
A0JLR7_MOUSE|A0JLR7_K762	Late-Uninfected	-0.0838331	0.132342	19.3593	0.533848	0.724831	0.272583	0.0838331	0.139763
A0JLR7_MOUSE|A0JLR7_K777	KO_Early-WT_Early	-0.319589	0.263923	19.3593	0.240503	0.412643	0.618879	0.319589	0.384426
A0JLR7_MOUSE|A0JLR7_K777	KO_Late-WT_Late	-0.297366	0.263923	19.3593	0.273636	0.480825	0.562827	0.297366	0.318013
A0JLR7_MOUSE|A0JLR7_K777	KO_Uninfected-WT_Uninfected	-0.492012	0.304752	19.3593	0.122608	0.303376	0.911482	0.492012	0.518019
A0JLR7_MOUSE|A0JLR7_K777	KO_Early-KO_Uninfected	-0.0902318	0.28507	19.3593	0.754991	0.929835	0.122058	0.0902318	0.0315943
A0JLR7_MOUSE|A0JLR7_K777	KO_Late-KO_Uninfected	-0.047125	0.28507	19.3593	0.870414	0.958279	0.0602743	0.047125	0.018508
A0JLR7_MOUSE|A0JLR7_K777	WT_Early-Wt_Uninfected	-0.262655	0.28507	19.3593	0.368197	0.650208	0.43392	0.262655	0.186948
A0JLR7_MOUSE|A0JLR7_K777	WT_Late-Wt_Uninfected	-0.241771	0.28507	19.3593	0.40674	0.664479	0.390683	0.241771	0.177519
A0JLR7_MOUSE|A0JLR7_K777	Infected-Uninfected	-0.160446	0.178677	19.3593	0.380237	0.604409	0.419946	0.160446	0.218669
A0JLR7_MOUSE|A0JLR7_K777	KO-WT	-0.369656	0.160619	19.3593	0.03263	0.0715774	1.48638	0.369656	1.14522
A0JLR7_MOUSE|A0JLR7_K777	Early-Uninfected	-0.176443	0.201575	19.3593	0.392128	0.669425	0.406572	0.176443	0.174298
A0JLR7_MOUSE|A0JLR7_K777	Late-Uninfected	-0.144448	0.201575	19.3593	0.482179	0.686851	0.316792	0.144448	0.163137
A0JLR7_MOUSE|A0JLR7_K78	KO_Early-WT_Early	-0.507427	0.273354	19.3593	0.0786965	0.19971	1.10404	0.507427	0.699601
A0JLR7_MOUSE|A0JLR7_K78	KO_Late-WT_Late	-0.358408	0.273354	19.3593	0.205147	0.400584	0.687936	0.358408	0.397306
A0JLR7_MOUSE|A0JLR7_K78	KO_Uninfected-WT_Uninfected	-0.524201	0.315641	19.3593	0.112875	0.289894	0.947403	0.524201	0.53776
A0JLR7_MOUSE|A0JLR7_K78	KO_Early-KO_Uninfected	-0.263309	0.295256	19.3593	0.383451	0.753134	0.41629	0.263309	0.123128
A0JLR7_MOUSE|A0JLR7_K78	KO_Late-KO_Uninfected	-0.388117	0.295256	19.3593	0.204035	0.534447	0.690295	0.388117	0.272096
A0JLR7_MOUSE|A0JLR7_K78	WT_Early-Wt_Uninfected	-0.280082	0.295256	19.3593	0.354512	0.63642	0.450369	0.280082	0.196256
A0JLR7_MOUSE|A0JLR7_K78	WT_Late-Wt_Uninfected	-0.55391	0.295256	19.3593	0.075811	0.269782	1.12027	0.55391	0.568987
A0JLR7_MOUSE|A0JLR7_K78	Infected-Uninfected	-0.371355	0.185061	19.3593	0.0589579	0.199254	1.22946	0.371355	0.700593
A0JLR7_MOUSE|A0JLR7_K78	KO-WT	-0.463345	0.166358	19.3593	0.0116578	0.0325197	1.93338	0.463345	1.48785
A0JLR7_MOUSE|A0JLR7_K78	Early-Uninfected	-0.271696	0.208777	19.3593	0.208408	0.489717	0.681085	0.271696	0.310055
A0JLR7_MOUSE|A0JLR7_K78	Late-Uninfected	-0.471014	0.208777	19.3593	0.0358135	0.144611	1.44595	0.471014	0.839799
A0JLR7_MOUSE|A0JLR7_K780	KO_Early-WT_Early	-0.286351	0.121232	19.3593	0.0287889	0.103825	1.54077	0.286351	0.983699
A0JLR7_MOUSE|A0JLR7_K780	KO_Late-WT_Late	-0.331537	0.121232	19.3593	0.013016	0.0759322	1.88552	0.331537	1.11957
A0JLR7_MOUSE|A0JLR7_K780	KO_Uninfected-WT_Uninfected	-0.359525	0.139987	19.3593	0.0186381	0.105975	1.7296	0.359525	0.974796
A0JLR7_MOUSE|A0JLR7_K780	KO_Early-KO_Uninfected	-0.0800991	0.130946	19.3593	0.547855	0.84395	0.261335	0.0800991	0.073683
A0JLR7_MOUSE|A0JLR7_K780	KO_Late-KO_Uninfected	-0.00259809	0.130946	19.3593	0.984373	0.996747	0.00684018	0.00259809	0.0014149
A0JLR7_MOUSE|A0JLR7_K780	WT_Early-Wt_Uninfected	-0.153272	0.130946	19.3593	0.256005	0.543009	0.591751	0.153272	0.265193
A0JLR7_MOUSE|A0JLR7_K780	WT_Late-Wt_Uninfected	-0.0305861	0.130946	19.3593	0.817764	0.92364	0.0873719	0.0305861	0.0344973
A0JLR7_MOUSE|A0JLR7_K780	Infected-Uninfected	-0.066639	0.0820745	19.3593	0.426702	0.645573	0.369876	0.066639	0.190055
A0JLR7_MOUSE|A0JLR7_K780	KO-WT	-0.325804	0.0737795	19.3593	0.000285143	0.00208532	3.54494	0.325804	2.68083
A0JLR7_MOUSE|A0JLR7_K780	Early-Uninfected	-0.116686	0.0925925	19.3593	0.222574	0.506327	0.652526	0.116686	0.295569
A0JLR7_MOUSE|A0JLR7_K780	Late-Uninfected	-0.0165921	0.0925925	19.3593	0.859647	0.92823	0.0656799	0.0165921	0.0323444
A0JLR7_MOUSE|A0JLR7_K805	KO_Early-WT_Early	-0.314414	0.15297	8.35931	0.0723806	0.188919	1.14038	0.314414	0.723724
A0JLR7_MOUSE|A0JLR7_K805	KO_Late-WT_Late	-0.38406	0.15297	8.35931	0.0351405	0.137183	1.45419	0.38406	0.862698
A0JLR7_MOUSE|A0JLR7_K805	KO_Uninfected-WT_Uninfected	-0.348684	0.187349	8.35931	0.0981629	0.265497	1.00805	0.348684	0.575941
A0JLR7_MOUSE|A0JLR7_K805	KO_Early-KO_Uninfected	-0.0617566	0.15297	8.35931	0.696551	0.90557	0.157047	0.0617566	0.043078
A0JLR7_MOUSE|A0JLR7_K805	KO_Late-KO_Uninfected	-0.00806122	0.15297	8.35931	0.95921	0.990146	0.0180863	0.00806122	0.00430097
A0JLR7_MOUSE|A0JLR7_K805	WT_Early-Wt_Uninfected	-0.0960263	0.187349	8.35931	0.62153	0.828143	0.206538	0.0960263	0.0818949
A0JLR7_MOUSE|A0JLR7_K805	WT_Late-Wt_Uninfected	0.0273146	0.187349	8.35931	0.887537	0.954224	0.0518133	0.0273146	0.0203496
A0JLR7_MOUSE|A0JLR7_K805	Infected-Uninfected	-0.0346324	0.108166	8.35931	0.75669	0.874162	0.121082	0.0346324	0.058408
A0JLR7_MOUSE|A0JLR7_K805	KO-WT	-0.349052	0.0953933	8.35931	0.00594429	0.0194319	2.2259	0.349052	1.71148
A0JLR7_MOUSE|A0JLR7_K805	Early-Uninfected	-0.0788914	0.120933	8.35931	0.531697	0.773687	0.274336	0.0788914	0.111435
A0JLR7_MOUSE|A0JLR7_K805	Late-Uninfected	0.00962669	0.120933	8.35931	0.938425	0.970484	0.0276002	0.00962669	0.0130116
A0JLR7_MOUSE|A0JLR7_K820	KO_Early-WT_Early	-0.800631	0.204676	19.3593	0.000910036	0.0119982	3.04094	0.800631	1.92089
A0JLR7_MOUSE|A0JLR7_K820	KO_Late-WT_Late	-0.684321	0.204676	19.3593	0.00334763	0.0345641	2.47526	0.684321	1.46138
A0JLR7_MOUSE|A0JLR7_K820	KO_Uninfected-WT_Uninfected	-0.670462	0.236339	19.3593	0.01041	0.0760056	1.98255	0.670462	1.11915
A0JLR7_MOUSE|A0JLR7_K820	KO_Early-KO_Uninfected	0.311977	0.221075	19.3593	0.174061	0.565408	0.759299	0.311977	0.247638
A0JLR7_MOUSE|A0JLR7_K820	KO_Late-KO_Uninfected	0.138161	0.221075	19.3593	0.5393	0.803157	0.268169	0.138161	0.0951995
A0JLR7_MOUSE|A0JLR7_K820	WT_Early-Wt_Uninfected	0.442146	0.221075	19.3593	0.0597311	0.257935	1.2238	0.442146	0.588489
A0JLR7_MOUSE|A0JLR7_K820	WT_Late-Wt_Uninfected	0.15202	0.221075	19.3593	0.499838	0.736758	0.301171	0.15202	0.132675
A0JLR7_MOUSE|A0JLR7_K820	Infected-Uninfected	0.261076	0.138566	19.3593	0.0746558	0.229255	1.12694	0.261076	0.639681
A0JLR7_MOUSE|A0JLR7_K820	KO-WT	-0.718471	0.124562	19.3593	1.37113e-05	0.000220243	4.86292	0.718471	3.6571
A0JLR7_MOUSE|A0JLR7_K820	Early-Uninfected	0.377061	0.156324	19.3593	0.0259362	0.151027	1.58609	0.377061	0.820947
A0JLR7_MOUSE|A0JLR7_K820	Late-Uninfected	0.14509	0.156324	19.3593	0.364763	0.585017	0.437989	0.14509	0.232831
A0JLR7_MOUSE|A0JLR7_K948	KO_Early-WT_Early	-0.778567	0.178055	8.35931	0.00213556	0.0205928	2.67049	0.778567	1.68629
A0JLR7_MOUSE|A0JLR7_K948	KO_Late-WT_Late	-0.61591	0.178055	8.35931	0.00802021	0.0589532	2.09581	0.61591	1.22949
A0JLR7_MOUSE|A0JLR7_K948	KO_Uninfected-WT_Uninfected	-0.271982	0.218072	8.35931	0.246129	0.453612	0.608838	0.271982	0.343316
A0JLR7_MOUSE|A0JLR7_K948	KO_Early-KO_Uninfected	-0.148794	0.178055	8.35931	0.426582	0.779996	0.369998	0.148794	0.107907
A0JLR7_MOUSE|A0JLR7_K948	KO_Late-KO_Uninfected	-0.264697	0.178055	8.35931	0.173832	0.495134	0.759871	0.264697	0.305277
A0JLR7_MOUSE|A0JLR7_K948	WT_Early-Wt_Uninfected	0.357791	0.218072	8.35931	0.137863	0.397278	0.860553	0.357791	0.400906
A0JLR7_MOUSE|A0JLR7_K948	WT_Late-Wt_Uninfected	0.0792316	0.218072	8.35931	0.725377	0.875003	0.139436	0.0792316	0.0579906
A0JLR7_MOUSE|A0JLR7_K948	Infected-Uninfected	0.00588279	0.125904	8.35931	0.96383	0.983339	0.0159996	0.00588279	0.00729671
A0JLR7_MOUSE|A0JLR7_K948	KO-WT	-0.555486	0.111037	8.35931	0.000919694	0.00494499	3.03636	0.555486	2.30583
A0JLR7_MOUSE|A0JLR7_K948	Early-Uninfected	0.104498	0.140765	8.35931	0.478208	0.732308	0.320383	0.104498	0.135306
A0JLR7_MOUSE|A0JLR7_K948	Late-Uninfected	-0.0927325	0.140765	8.35931	0.527765	0.720012	0.27756	0.0927325	0.14266
A16A1_MOUSE|Q571I9_K603	KO_Early-WT_Early	0.0814312	0.166921	19.3593	0.63114	0.763172	0.199874	0.0814312	0.117378
A16A1_MOUSE|Q571I9_K603	KO_Late-WT_Late	-0.00265997	0.166921	19.3593	0.987449	0.994018	0.00548535	0.00265997	0.00260592
A16A1_MOUSE|Q571I9_K603	KO_Uninfected-WT_Uninfected	-0.0878385	0.192744	19.3593	0.653657	0.798264	0.18465	0.0878385	0.0978536
A16A1_MOUSE|Q571I9_K603	KO_Early-KO_Uninfected	0.026433	0.180295	19.3593	0.884956	0.968947	0.0530782	0.026433	0.0136999
A16A1_MOUSE|Q571I9_K603	KO_Late-KO_Uninfected	-0.0086191	0.180295	19.3593	0.962361	0.990737	0.016662	0.0086191	0.00404163
A16A1_MOUSE|Q571I9_K603	WT_Early-Wt_Uninfected	-0.142837	0.180295	19.3593	0.437823	0.706344	0.358701	0.142837	0.150984
A16A1_MOUSE|Q571I9_K603	WT_Late-Wt_Uninfected	-0.0937976	0.180295	19.3593	0.608792	0.808611	0.215531	0.0937976	0.0922602
A16A1_MOUSE|Q571I9_K603	Infected-Uninfected	-0.0547051	0.113006	19.3593	0.633753	0.801553	0.19808	0.0547051	0.096068
A16A1_MOUSE|Q571I9_K603	KO-WT	-0.00302241	0.101585	19.3593	0.976569	0.985138	0.0102971	0.00302241	0.00650298
A16A1_MOUSE|Q571I9_K603	Early-Uninfected	-0.0582018	0.127488	19.3593	0.653091	0.846422	0.185026	0.0582018	0.0724131
A16A1_MOUSE|Q571I9_K603	Late-Uninfected	-0.0512084	0.127488	19.3593	0.692325	0.83346	0.15969	0.0512084	0.0791155
A1L3S5_MOUSE|A1L3S5_K512	KO_Early-WT_Early	0.65661	0.236697	8.35931	0.0231534	0.0906207	1.63539	0.65661	1.04277
A1L3S5_MOUSE|A1L3S5_K512	KO_Late-WT_Late	0.779054	0.236697	8.35931	0.0103507	0.0678033	1.98503	0.779054	1.16875
A1L3S5_MOUSE|A1L3S5_K512	KO_Uninfected-WT_Uninfected	0.23809	0.289893	8.35931	0.43427	0.631346	0.36224	0.23809	0.199733
A1L3S5_MOUSE|A1L3S5_K512	KO_Early-KO_Uninfected	-0.372885	0.236697	8.35931	0.1522	0.53456	0.817586	0.372885	0.272004
A1L3S5_MOUSE|A1L3S5_K512	KO_Late-KO_Uninfected	-0.479182	0.236697	8.35931	0.0759995	0.331136	1.11919	0.479182	0.479993
A1L3S5_MOUSE|A1L3S5_K512	WT_Early-Wt_Uninfected	-0.791405	0.289893	8.35931	0.0248218	0.16215	1.60517	0.791405	0.790083
A1L3S5_MOUSE|A1L3S5_K512	WT_Late-Wt_Uninfected	-1.02015	0.289893	8.35931	0.00732765	0.0655325	2.13504	1.02015	1.18354
A1L3S5_MOUSE|A1L3S5_K512	Infected-Uninfected	-0.665905	0.16737	8.35931	0.00372475	0.0328548	2.4289	0.665905	1.4834
A1L3S5_MOUSE|A1L3S5_K512	KO-WT	0.557918	0.147606	8.35931	0.00497409	0.017016	2.30329	0.557918	1.76914
A1L3S5_MOUSE|A1L3S5_K512	Early-Uninfected	-0.582145	0.187125	8.35931	0.0136658	0.101758	1.86436	0.582145	0.992432
A1L3S5_MOUSE|A1L3S5_K512	Late-Uninfected	-0.749664	0.187125	8.35931	0.0035799	0.0296356	2.44613	0.749664	1.52819
A1L3S5_MOUSE|A1L3S5_K522	KO_Early-WT_Early	0.433993	0.200808	8.35931	0.0612266	0.171384	1.21306	0.433993	0.766029
A1L3S5_MOUSE|A1L3S5_K522	KO_Late-WT_Late	0.485567	0.200808	8.35931	0.0407152	0.149486	1.39024	0.485567	0.825399
A1L3S5_MOUSE|A1L3S5_K522	KO_Uninfected-WT_Uninfected	-0.00882904	0.245939	8.35931	0.972205	0.985891	0.0122421	0.00882904	0.00617093
A1L3S5_MOUSE|A1L3S5_K522	KO_Early-KO_Uninfected	-0.335174	0.200808	8.35931	0.132018	0.504737	0.879366	0.335174	0.296935
A1L3S5_MOUSE|A1L3S5_K522	KO_Late-KO_Uninfected	-0.335547	0.200808	8.35931	0.131644	0.432889	0.8806	0.335547	0.363624
A1L3S5_MOUSE|A1L3S5_K522	WT_Early-Wt_Uninfected	-0.777996	0.245939	8.35931	0.0126019	0.11028	1.89956	0.777996	0.957502
A1L3S5_MOUSE|A1L3S5_K522	WT_Late-Wt_Uninfected	-0.829944	0.245939	8.35931	0.00911621	0.0760407	2.04019	0.829944	1.11895
A1L3S5_MOUSE|A1L3S5_K522	Infected-Uninfected	-0.569665	0.141993	8.35931	0.00355062	0.0317569	2.4497	0.569665	1.49816
A1L3S5_MOUSE|A1L3S5_K522	KO-WT	0.303577	0.125226	8.35931	0.0403176	0.0843965	1.39451	0.303577	1.07368
A1L3S5_MOUSE|A1L3S5_K522	Early-Uninfected	-0.556585	0.158753	8.35931	0.00747288	0.0683113	2.12651	0.556585	1.16551
A1L3S5_MOUSE|A1L3S5_K522	Late-Uninfected	-0.582746	0.158753	8.35931	0.00584209	0.0419189	2.23343	0.582746	1.37759
A1L3S5_MOUSE|A1L3S5_K523	KO_Early-WT_Early	0.421465	0.195917	8.35931	0.0622029	0.173028	1.20619	0.421465	0.761883
A1L3S5_MOUSE|A1L3S5_K523	KO_Late-WT_Late	0.249567	0.195917	8.35931	0.236993	0.439376	0.625264	0.249567	0.357164
A1L3S5_MOUSE|A1L3S5_K523	KO_Uninfected-WT_Uninfected	-0.121502	0.239948	8.35931	0.62568	0.77822	0.203648	0.121502	0.108898
A1L3S5_MOUSE|A1L3S5_K523	KO_Early-KO_Uninfected	0.104594	0.195917	8.35931	0.607334	0.871429	0.216573	0.104594	0.059768
A1L3S5_MOUSE|A1L3S5_K523	KO_Late-KO_Uninfected	0.046565	0.195917	8.35931	0.817853	0.937228	0.0873246	0.046565	0.0281545
A1L3S5_MOUSE|A1L3S5_K523	WT_Early-Wt_Uninfected	-0.438374	0.239948	8.35931	0.103524	0.344176	0.984958	0.438374	0.463219
A1L3S5_MOUSE|A1L3S5_K523	WT_Late-Wt_Uninfected	-0.324504	0.239948	8.35931	0.211694	0.471553	0.674291	0.324504	0.326469
A1L3S5_MOUSE|A1L3S5_K523	Infected-Uninfected	-0.15293	0.138534	8.35931	0.30039	0.528381	0.522314	0.15293	0.277053
A1L3S5_MOUSE|A1L3S5_K523	KO-WT	0.183177	0.122175	8.35931	0.17058	0.261245	0.768072	0.183177	0.582953
A1L3S5_MOUSE|A1L3S5_K523	Early-Uninfected	-0.16689	0.154886	8.35931	0.311364	0.597952	0.506732	0.16689	0.223334
A1L3S5_MOUSE|A1L3S5_K523	Late-Uninfected	-0.13897	0.154886	8.35931	0.394696	0.610995	0.403737	0.13897	0.213962
A2ANX3_MOUSE|A2ANX3_K127	KO_Early-WT_Early	0.281055	0.255761	8.35931	0.302452	0.478628	0.519343	0.281055	0.320002
A2ANX3_MOUSE|A2ANX3_K127	KO_Late-WT_Late	0.50293	0.255761	8.35931	0.0832637	0.230757	1.07954	0.50293	0.636845
A2ANX3_MOUSE|A2ANX3_K127	KO_Uninfected-WT_Uninfected	-0.000261617	0.313242	8.35931	0.999353	0.999572	0.000280991	0.000261617	0.000185936
A2ANX3_MOUSE|A2ANX3_K127	KO_Early-KO_Uninfected	-0.421299	0.255761	8.35931	0.136498	0.511775	0.864873	0.421299	0.290921
A2ANX3_MOUSE|A2ANX3_K127	KO_Late-KO_Uninfected	-0.0815427	0.255761	8.35931	0.757681	0.916745	0.120513	0.0815427	0.0377514
A2ANX3_MOUSE|A2ANX3_K127	WT_Early-Wt_Uninfected	-0.702615	0.313242	8.35931	0.053775	0.244759	1.26942	0.702615	0.611261
A2ANX3_MOUSE|A2ANX3_K127	WT_Late-Wt_Uninfected	-0.584734	0.313242	8.35931	0.097315	0.312161	1.01182	0.584734	0.505621
A2ANX3_MOUSE|A2ANX3_K127	Infected-Uninfected	-0.447548	0.18085	8.35931	0.0372101	0.151687	1.42934	0.447548	0.819053
A2ANX3_MOUSE|A2ANX3_K127	KO-WT	0.261241	0.159495	8.35931	0.138446	0.222352	0.858721	0.261241	0.652958
A2ANX3_MOUSE|A2ANX3_K127	Early-Uninfected	-0.561957	0.202197	8.35931	0.0229641	0.139108	1.63895	0.561957	0.856648
A2ANX3_MOUSE|A2ANX3_K127	Late-Uninfected	-0.333138	0.202197	8.35931	0.136424	0.332909	0.86511	0.333138	0.477674
A2ANX3_MOUSE|A2ANX3_K426	KO_Early-WT_Early	0.211363	0.203445	19.3593	0.311647	0.487159	0.506338	0.211363	0.312329
A2ANX3_MOUSE|A2ANX3_K426	KO_Late-WT_Late	0.366636	0.203445	19.3593	0.0871175	0.237323	1.05989	0.366636	0.62466
A2ANX3_MOUSE|A2ANX3_K426	KO_Uninfected-WT_Uninfected	0.0217249	0.234918	19.3593	0.927268	0.964612	0.0327946	0.0217249	0.0156475
A2ANX3_MOUSE|A2ANX3_K426	KO_Early-KO_Uninfected	-0.0644863	0.219746	19.3593	0.772295	0.935886	0.112217	0.0644863	0.0287768
A2ANX3_MOUSE|A2ANX3_K426	KO_Late-KO_Uninfected	0.0230603	0.219746	19.3593	0.917503	0.97712	0.0373927	0.0230603	0.0100521
A2ANX3_MOUSE|A2ANX3_K426	WT_Early-Wt_Uninfected	-0.254124	0.219746	19.3593	0.261572	0.547663	0.582409	0.254124	0.261487
A2ANX3_MOUSE|A2ANX3_K426	WT_Late-Wt_Uninfected	-0.321851	0.219746	19.3593	0.159068	0.404933	0.798417	0.321851	0.392617
A2ANX3_MOUSE|A2ANX3_K426	Infected-Uninfected	-0.15435	0.137733	19.3593	0.276148	0.502946	0.558858	0.15435	0.298479
A2ANX3_MOUSE|A2ANX3_K426	KO-WT	0.199908	0.123813	19.3593	0.122579	0.201824	0.911583	0.199908	0.695026
A2ANX3_MOUSE|A2ANX3_K426	Early-Uninfected	-0.159305	0.155384	19.3593	0.317893	0.601371	0.497719	0.159305	0.220857
A2ANX3_MOUSE|A2ANX3_K426	Late-Uninfected	-0.149395	0.155384	19.3593	0.348177	0.569056	0.458199	0.149395	0.244845
A2ANX3_MOUSE|A2ANX3_K441	KO_Early-WT_Early	0.610781	0.332158	8.35931	0.101633	0.234666	0.992966	0.610781	0.629549
A2ANX3_MOUSE|A2ANX3_K441	KO_Late-WT_Late	0.546904	0.332158	8.35931	0.136648	0.311886	0.864396	0.546904	0.506004
A2ANX3_MOUSE|A2ANX3_K441	KO_Uninfected-WT_Uninfected	0.504045	0.406809	8.35931	0.248997	0.456772	0.603807	0.504045	0.340301
A2ANX3_MOUSE|A2ANX3_K441	KO_Early-KO_Uninfected	-0.183977	0.332158	8.35931	0.594161	0.863674	0.226096	0.183977	0.0636504
A2ANX3_MOUSE|A2ANX3_K441	KO_Late-KO_Uninfected	-0.265332	0.332158	8.35931	0.446501	0.741992	0.350178	0.265332	0.129601
A2ANX3_MOUSE|A2ANX3_K441	WT_Early-Wt_Uninfected	-0.290713	0.406809	8.35931	0.494316	0.745303	0.305995	0.290713	0.127667
A2ANX3_MOUSE|A2ANX3_K441	WT_Late-Wt_Uninfected	-0.30819	0.406809	8.35931	0.469518	0.715254	0.328347	0.30819	0.14554
A2ANX3_MOUSE|A2ANX3_K441	Infected-Uninfected	-0.262053	0.234871	8.35931	0.295582	0.523343	0.529322	0.262053	0.281214
A2ANX3_MOUSE|A2ANX3_K441	KO-WT	0.55391	0.207137	8.35931	0.027115	0.0622205	1.56679	0.55391	1.20607
A2ANX3_MOUSE|A2ANX3_K441	Early-Uninfected	-0.237345	0.262594	8.35931	0.391379	0.669151	0.407402	0.237345	0.174476
A2ANX3_MOUSE|A2ANX3_K441	Late-Uninfected	-0.286761	0.262594	8.35931	0.305291	0.527302	0.515286	0.286761	0.27794
A2ANX3_MOUSE|A2ANX3_K562	KO_Early-WT_Early	-0.105083	0.182923	8.35931	0.580779	0.72269	0.235989	0.105083	0.141048
A2ANX3_MOUSE|A2ANX3_K562	KO_Late-WT_Late	0.159967	0.182923	8.35931	0.406267	0.612497	0.391189	0.159967	0.212896
A2ANX3_MOUSE|A2ANX3_K562	KO_Uninfected-WT_Uninfected	0.187777	0.224035	8.35931	0.425255	0.623691	0.37135	0.187777	0.205031
A2ANX3_MOUSE|A2ANX3_K562	KO_Early-KO_Uninfected	-0.653798	0.182923	8.35931	0.00674634	0.116765	2.17093	0.653798	0.932686
A2ANX3_MOUSE|A2ANX3_K562	KO_Late-KO_Uninfected	-0.541023	0.182923	8.35931	0.0173516	0.151327	1.76066	0.541023	0.820083
A2ANX3_MOUSE|A2ANX3_K562	WT_Early-Wt_Uninfected	-0.360937	0.224035	8.35931	0.144204	0.407178	0.841022	0.360937	0.390215
A2ANX3_MOUSE|A2ANX3_K562	WT_Late-Wt_Uninfected	-0.513213	0.224035	8.35931	0.0498483	0.213206	1.30235	0.513213	0.6712
A2ANX3_MOUSE|A2ANX3_K562	Infected-Uninfected	-0.517243	0.129346	8.35931	0.00361774	0.0322165	2.44156	0.517243	1.49192
A2ANX3_MOUSE|A2ANX3_K562	KO-WT	0.0808871	0.114073	8.35931	0.49757	0.605799	0.303146	0.0808871	0.217671
A2ANX3_MOUSE|A2ANX3_K562	Early-Uninfected	-0.507368	0.144614	8.35931	0.00744543	0.0681343	2.12811	0.507368	1.16663
A2ANX3_MOUSE|A2ANX3_K562	Late-Uninfected	-0.527118	0.144614	8.35931	0.00606994	0.0428329	2.21682	0.527118	1.36822
A2ANX3_MOUSE|A2ANX3_K608	KO_Early-WT_Early	0.42357	0.153333	19.3593	0.0122535	0.060548	1.91174	0.42357	1.2179
A2ANX3_MOUSE|A2ANX3_K608	KO_Late-WT_Late	0.0427922	0.153333	19.3593	0.783142	0.88621	0.106159	0.0427922	0.0524632
A2ANX3_MOUSE|A2ANX3_K608	KO_Uninfected-WT_Uninfected	-0.0591115	0.177053	19.3593	0.742073	0.85813	0.129553	0.0591115	0.0664467
A2ANX3_MOUSE|A2ANX3_K608	KO_Early-KO_Uninfected	-0.29489	0.165618	19.3593	0.0906881	0.428475	1.04245	0.29489	0.368074
A2ANX3_MOUSE|A2ANX3_K608	KO_Late-KO_Uninfected	-0.615726	0.165618	19.3593	0.00142202	0.0297036	2.8471	0.615726	1.52719
A2ANX3_MOUSE|A2ANX3_K608	WT_Early-Wt_Uninfected	-0.777571	0.165618	19.3593	0.000150583	0.00697045	3.82222	0.777571	2.15674
A2ANX3_MOUSE|A2ANX3_K608	WT_Late-Wt_Uninfected	-0.71763	0.165618	19.3593	0.000344939	0.00797523	3.46226	0.71763	2.09826
A2ANX3_MOUSE|A2ANX3_K608	Infected-Uninfected	-0.601454	0.103807	19.3593	1.29577e-05	0.000482121	4.88747	0.601454	3.31684
A2ANX3_MOUSE|A2ANX3_K608	KO-WT	0.13575	0.0933154	19.3593	0.161762	0.250932	0.791123	0.13575	0.600443
A2ANX3_MOUSE|A2ANX3_K608	Early-Uninfected	-0.53623	0.11711	19.3593	0.000196297	0.00518945	3.70709	0.53623	2.28488
A2ANX3_MOUSE|A2ANX3_K608	Late-Uninfected	-0.666678	0.11711	19.3593	1.61568e-05	0.000497942	4.79164	0.666678	3.30282
A2ANY6_MOUSE|A2ANY6_K1739	KO_Early-WT_Early	1.02567	0.197983	8.35931	0.000732642	0.0104396	3.13511	1.02567	1.98131
A2ANY6_MOUSE|A2ANY6_K1739	KO_Late-WT_Late	0.749098	0.197983	8.35931	0.00494585	0.0445083	2.30576	0.749098	1.35156
A2ANY6_MOUSE|A2ANY6_K1739	KO_Uninfected-WT_Uninfected	0.36788	0.242479	8.35931	0.166093	0.362484	0.779648	0.36788	0.440711
A2ANY6_MOUSE|A2ANY6_K1739	KO_Early-KO_Uninfected	0.361354	0.197983	8.35931	0.103811	0.453667	0.983756	0.361354	0.343263
A2ANY6_MOUSE|A2ANY6_K1739	KO_Late-KO_Uninfected	0.565822	0.197983	8.35931	0.0202884	0.164461	1.69275	0.565822	0.783937
A2ANY6_MOUSE|A2ANY6_K1739	WT_Early-Wt_Uninfected	-0.296435	0.242479	8.35931	0.254859	0.541589	0.5937	0.296435	0.26633
A2ANY6_MOUSE|A2ANY6_K1739	WT_Late-Wt_Uninfected	0.184604	0.242479	8.35931	0.467398	0.712873	0.330313	0.184604	0.146988
A2ANY6_MOUSE|A2ANY6_K1739	Infected-Uninfected	0.203836	0.139995	8.35931	0.181893	0.395395	0.740185	0.203836	0.402969
A2ANY6_MOUSE|A2ANY6_K1739	KO-WT	0.714215	0.123464	8.35931	0.000349707	0.00244079	3.4563	0.714215	2.61247
A2ANY6_MOUSE|A2ANY6_K1739	Early-Uninfected	0.0324595	0.156519	8.35931	0.840674	0.937738	0.0753724	0.0324595	0.0279184
A2ANY6_MOUSE|A2ANY6_K1739	Late-Uninfected	0.375213	0.156519	8.35931	0.0420869	0.159952	1.37585	0.375213	0.796011
A2ANY6_MOUSE|A2ANY6_K1742	KO_Early-WT_Early	0.50568	0.198863	8.35931	0.0333904	0.115372	1.47638	0.50568	0.937899
A2ANY6_MOUSE|A2ANY6_K1742	KO_Late-WT_Late	0.430576	0.198863	8.35931	0.0608447	0.191912	1.21578	0.430576	0.716898
A2ANY6_MOUSE|A2ANY6_K1742	KO_Uninfected-WT_Uninfected	0.00551796	0.243557	8.35931	0.982456	0.991373	0.00768671	0.00551796	0.00376298
A2ANY6_MOUSE|A2ANY6_K1742	KO_Early-KO_Uninfected	0.366912	0.198863	8.35931	0.100655	0.449974	0.997166	0.366912	0.346813
A2ANY6_MOUSE|A2ANY6_K1742	KO_Late-KO_Uninfected	0.459659	0.198863	8.35931	0.0482383	0.262768	1.31661	0.459659	0.580428
A2ANY6_MOUSE|A2ANY6_K1742	WT_Early-Wt_Uninfected	-0.133251	0.243557	8.35931	0.598607	0.815195	0.222858	0.133251	0.0887383
A2ANY6_MOUSE|A2ANY6_K1742	WT_Late-Wt_Uninfected	0.0346015	0.243557	8.35931	0.890391	0.955385	0.050419	0.0346015	0.0198217
A2ANY6_MOUSE|A2ANY6_K1742	Infected-Uninfected	0.181981	0.140618	8.35931	0.23022	0.453613	0.637857	0.181981	0.343315
A2ANY6_MOUSE|A2ANY6_K1742	KO-WT	0.313925	0.124013	8.35931	0.0340042	0.0738369	1.46847	0.313925	1.13173
A2ANY6_MOUSE|A2ANY6_K1742	Early-Uninfected	0.116831	0.157215	8.35931	0.477769	0.732147	0.320782	0.116831	0.135402
A2ANY6_MOUSE|A2ANY6_K1742	Late-Uninfected	0.24713	0.157215	8.35931	0.152992	0.355552	0.81533	0.24713	0.449097
A2ASL8_MOUSE|A2ASL8_K369	KO_Early-WT_Early	-0.380105	0.188948	8.35931	0.0775425	0.197595	1.11046	0.380105	0.704224
A2ASL8_MOUSE|A2ASL8_K369	KO_Late-WT_Late	-0.323921	0.188948	8.35931	0.123189	0.293224	0.909428	0.323921	0.5328
A2ASL8_MOUSE|A2ASL8_K369	KO_Uninfected-WT_Uninfected	-0.277213	0.231413	8.35931	0.263809	0.470951	0.57871	0.277213	0.327024
A2ASL8_MOUSE|A2ASL8_K369	KO_Early-KO_Uninfected	-0.138081	0.188948	8.35931	0.484886	0.813602	0.314361	0.138081	0.0895882
A2ASL8_MOUSE|A2ASL8_K369	KO_Late-KO_Uninfected	-0.392657	0.188948	8.35931	0.0698307	0.316793	1.15595	0.392657	0.499224
A2ASL8_MOUSE|A2ASL8_K369	WT_Early-Wt_Uninfected	-0.0351895	0.231413	8.35931	0.882743	0.955503	0.0541658	0.0351895	0.0197679
A2ASL8_MOUSE|A2ASL8_K369	WT_Late-Wt_Uninfected	-0.345949	0.231413	8.35931	0.171688	0.423365	0.76526	0.345949	0.373285
A2ASL8_MOUSE|A2ASL8_K369	Infected-Uninfected	-0.227969	0.133606	8.35931	0.124723	0.316509	0.904054	0.227969	0.499614
A2ASL8_MOUSE|A2ASL8_K369	KO-WT	-0.32708	0.11783	8.35931	0.0230873	0.0546701	1.63663	0.32708	1.26225
A2ASL8_MOUSE|A2ASL8_K369	Early-Uninfected	-0.0866351	0.149376	8.35931	0.577224	0.801378	0.238656	0.0866351	0.0961628
A2ASL8_MOUSE|A2ASL8_K369	Late-Uninfected	-0.369303	0.149376	8.35931	0.0373516	0.148515	1.42769	0.369303	0.82823
A2AT02_MOUSE|A2AT02_K146	KO_Early-WT_Early	-0.477308	0.181089	8.35931	0.0288138	0.103837	1.5404	0.477308	0.983646
A2AT02_MOUSE|A2AT02_K146	KO_Late-WT_Late	-0.196415	0.181089	8.35931	0.308372	0.51739	0.510925	0.196415	0.286182
A2AT02_MOUSE|A2AT02_K146	KO_Uninfected-WT_Uninfected	-0.412864	0.221788	8.35931	0.0981058	0.265497	1.00831	0.412864	0.575941
A2AT02_MOUSE|A2AT02_K146	KO_Early-KO_Uninfected	-0.0958384	0.181089	8.35931	0.610407	0.873008	0.214381	0.0958384	0.0589816
A2AT02_MOUSE|A2AT02_K146	KO_Late-KO_Uninfected	-0.0415231	0.181089	8.35931	0.82415	0.939498	0.0839937	0.0415231	0.0271042
A2AT02_MOUSE|A2AT02_K146	WT_Early-Wt_Uninfected	-0.031394	0.221788	8.35931	0.890788	0.958951	0.0502256	0.031394	0.0182037
A2AT02_MOUSE|A2AT02_K146	WT_Late-Wt_Uninfected	-0.257971	0.221788	8.35931	0.276898	0.540945	0.557681	0.257971	0.266847
A2AT02_MOUSE|A2AT02_K146	Infected-Uninfected	-0.106682	0.128049	8.35931	0.427933	0.646481	0.368624	0.106682	0.189444
A2AT02_MOUSE|A2AT02_K146	KO-WT	-0.362196	0.112929	8.35931	0.0117768	0.0327713	1.92897	0.362196	1.48451
A2AT02_MOUSE|A2AT02_K146	Early-Uninfected	-0.0636162	0.143164	8.35931	0.668062	0.854352	0.175183	0.0636162	0.0683629
A2AT02_MOUSE|A2AT02_K146	Late-Uninfected	-0.149747	0.143164	8.35931	0.324868	0.545284	0.488292	0.149747	0.263377
A2AWR3_MOUSE|A2AWR3_K69	KO_Early-WT_Early	-0.351129	0.180877	8.35931	0.0866136	0.212098	1.06241	0.351129	0.673464
A2AWR3_MOUSE|A2AWR3_K69	KO_Late-WT_Late	-0.0350343	0.180877	8.35931	0.851042	0.923558	0.0700492	0.0350343	0.0345357
A2AWR3_MOUSE|A2AWR3_K69	KO_Uninfected-WT_Uninfected	-0.29209	0.221528	8.35931	0.222307	0.426521	0.653046	0.29209	0.37006
A2AWR3_MOUSE|A2AWR3_K69	KO_Early-KO_Uninfected	0.138768	0.180877	8.35931	0.46408	0.8016	0.333407	0.138768	0.0960421
A2AWR3_MOUSE|A2AWR3_K69	KO_Late-KO_Uninfected	-0.21258	0.180877	8.35931	0.272273	0.608803	0.564996	0.21258	0.215523
A2AWR3_MOUSE|A2AWR3_K69	WT_Early-Wt_Uninfected	0.197807	0.221528	8.35931	0.396876	0.674586	0.401345	0.197807	0.170962
A2AWR3_MOUSE|A2AWR3_K69	WT_Late-Wt_Uninfected	-0.469636	0.221528	8.35931	0.0653594	0.247907	1.18469	0.469636	0.605711
A2AWR3_MOUSE|A2AWR3_K69	Infected-Uninfected	-0.0864101	0.127899	8.35931	0.517539	0.718412	0.286057	0.0864101	0.143626
A2AWR3_MOUSE|A2AWR3_K69	KO-WT	-0.226084	0.112797	8.35931	0.0784429	0.142489	1.10545	0.226084	0.84622
A2AWR3_MOUSE|A2AWR3_K69	Early-Uninfected	0.168288	0.142996	8.35931	0.271669	0.558235	0.56596	0.168288	0.253183
A2AWR3_MOUSE|A2AWR3_K69	Late-Uninfected	-0.341108	0.142996	8.35931	0.0428834	0.161674	1.36771	0.341108	0.79136
A3KGI3_MOUSE|A3KGI3_K1828	KO_Early-WT_Early	-1.41104	0.148108	19.3593	9.606e-09	4.46723e-06	8.01746	1.41104	5.34996
A3KGI3_MOUSE|A3KGI3_K1828	KO_Late-WT_Late	-1.07592	0.148108	19.3593	6.0848e-07	0.000155649	6.21575	1.07592	3.80785
A3KGI3_MOUSE|A3KGI3_K1828	KO_Uninfected-WT_Uninfected	-0.594272	0.171021	19.3593	0.00248129	0.0327921	2.60532	0.594272	1.48423
A3KGI3_MOUSE|A3KGI3_K1828	KO_Early-KO_Uninfected	-0.675226	0.159975	19.3593	0.000446516	0.0185667	3.35016	0.675226	1.73127
A3KGI3_MOUSE|A3KGI3_K1828	KO_Late-KO_Uninfected	-0.175733	0.159975	19.3593	0.285459	0.620274	0.544456	0.175733	0.207416
A3KGI3_MOUSE|A3KGI3_K1828	WT_Early-Wt_Uninfected	0.141541	0.159975	19.3593	0.38714	0.666853	0.412132	0.141541	0.17597
A3KGI3_MOUSE|A3KGI3_K1828	WT_Late-Wt_Uninfected	0.305911	0.159975	19.3593	0.0707588	0.259288	1.15022	0.305911	0.586217
A3KGI3_MOUSE|A3KGI3_K1828	Infected-Uninfected	-0.100877	0.10027	19.3593	0.326799	0.555726	0.48572	0.100877	0.255139
A3KGI3_MOUSE|A3KGI3_K1828	KO-WT	-1.02708	0.0901358	19.3593	4.95909e-10	8.74852e-08	9.3046	1.02708	7.05807
A3KGI3_MOUSE|A3KGI3_K1828	Early-Uninfected	-0.266843	0.113119	19.3593	0.0289729	0.161362	1.53801	0.266843	0.792199
A3KGI3_MOUSE|A3KGI3_K1828	Late-Uninfected	0.0650887	0.113119	19.3593	0.57165	0.75385	0.24287	0.0650887	0.122715
A6H6T7_MOUSE|A6H6T7_K26	KO_Early-WT_Early	1.05502	0.661912	8.35931	0.148003	0.300655	0.829728	1.05502	0.521932
A6H6T7_MOUSE|A6H6T7_K26	KO_Late-WT_Late	0.576066	0.661912	8.35931	0.408429	0.614114	0.388883	0.576066	0.211751
A6H6T7_MOUSE|A6H6T7_K26	KO_Uninfected-WT_Uninfected	2.06668	0.810673	8.35931	0.0330481	0.146089	1.48085	2.06668	0.835383
A6H6T7_MOUSE|A6H6T7_K26	KO_Early-KO_Uninfected	-0.815268	0.661912	8.35931	0.251588	0.648269	0.599309	0.815268	0.188245
A6H6T7_MOUSE|A6H6T7_K26	KO_Late-KO_Uninfected	-1.26457	0.661912	8.35931	0.090889	0.360945	1.04149	1.26457	0.442559
A6H6T7_MOUSE|A6H6T7_K26	WT_Early-Wt_Uninfected	0.196397	0.810673	8.35931	0.814414	0.927883	0.0891547	0.196397	0.032507
A6H6T7_MOUSE|A6H6T7_K26	WT_Late-Wt_Uninfected	0.226047	0.810673	8.35931	0.787143	0.907819	0.103946	0.226047	0.0420006
A6H6T7_MOUSE|A6H6T7_K26	Infected-Uninfected	-0.414348	0.468043	8.35931	0.400753	0.623462	0.397123	0.414348	0.20519
A6H6T7_MOUSE|A6H6T7_K26	KO-WT	1.23259	0.412775	8.35931	0.0165968	0.0422865	1.77998	1.23259	1.3738
A6H6T7_MOUSE|A6H6T7_K26	Early-Uninfected	-0.309436	0.523287	8.35931	0.569941	0.79766	0.24417	0.309436	0.0981822
A6H6T7_MOUSE|A6H6T7_K26	Late-Uninfected	-0.519261	0.523287	8.35931	0.3489	0.569642	0.457299	0.519261	0.244398
A7L3B_MOUSE|Q3UD01_K67	KO_Early-WT_Early	0.0968837	0.315478	8.35931	0.766278	0.85812	0.115614	0.0968837	0.0664518
A7L3B_MOUSE|Q3UD01_K67	KO_Late-WT_Late	0.60529	0.315478	8.35931	0.0897353	0.24118	1.04704	0.60529	0.617659
A7L3B_MOUSE|Q3UD01_K67	KO_Uninfected-WT_Uninfected	-0.230307	0.38638	8.35931	0.56692	0.73573	0.246479	0.230307	0.133282
A7L3B_MOUSE|Q3UD01_K67	KO_Early-KO_Uninfected	0.120657	0.315478	8.35931	0.711663	0.912808	0.147726	0.120657	0.0396203
A7L3B_MOUSE|Q3UD01_K67	KO_Late-KO_Uninfected	0.6125	0.315478	8.35931	0.0865809	0.351198	1.06258	0.6125	0.454448
A7L3B_MOUSE|Q3UD01_K67	WT_Early-Wt_Uninfected	-0.206533	0.38638	8.35931	0.606893	0.819822	0.216888	0.206533	0.0862804
A7L3B_MOUSE|Q3UD01_K67	WT_Late-Wt_Uninfected	-0.223097	0.38638	8.35931	0.578883	0.791362	0.237409	0.223097	0.101625
A7L3B_MOUSE|Q3UD01_K67	Infected-Uninfected	0.0758815	0.223076	8.35931	0.742127	0.865299	0.129522	0.0758815	0.0628336
A7L3B_MOUSE|Q3UD01_K67	KO-WT	0.157289	0.196735	8.35931	0.446124	0.556607	0.350545	0.157289	0.254451
A7L3B_MOUSE|Q3UD01_K67	Early-Uninfected	-0.0429382	0.249407	8.35931	0.867406	0.949138	0.0617775	0.0429382	0.0226706
A7L3B_MOUSE|Q3UD01_K67	Late-Uninfected	0.194701	0.249407	8.35931	0.45654	0.664672	0.340521	0.194701	0.177392
AAAT_MOUSE|P51912_K384	KO_Early-WT_Early	-0.478991	0.204189	8.35931	0.0456716	0.141725	1.34035	0.478991	0.848555
AAAT_MOUSE|P51912_K384	KO_Late-WT_Late	-0.392211	0.204189	8.35931	0.0894296	0.240674	1.04852	0.392211	0.61857
AAAT_MOUSE|P51912_K384	KO_Uninfected-WT_Uninfected	-0.30311	0.250079	8.35931	0.258633	0.466532	0.587315	0.30311	0.331118
AAAT_MOUSE|P51912_K384	KO_Early-KO_Uninfected	0.445496	0.204189	8.35931	0.0592644	0.35673	1.22721	0.445496	0.44766
AAAT_MOUSE|P51912_K384	KO_Late-KO_Uninfected	0.281233	0.204189	8.35931	0.204166	0.534447	0.690017	0.281233	0.272096
AAAT_MOUSE|P51912_K384	WT_Early-Wt_Uninfected	0.621377	0.250079	8.35931	0.0366213	0.199274	1.43627	0.621377	0.700549
AAAT_MOUSE|P51912_K384	WT_Late-Wt_Uninfected	0.370333	0.250079	8.35931	0.175319	0.427191	0.756171	0.370333	0.369378
AAAT_MOUSE|P51912_K384	Infected-Uninfected	0.42961	0.144383	8.35931	0.0168745	0.0904451	1.77277	0.42961	1.04362
AAAT_MOUSE|P51912_K384	KO-WT	-0.391438	0.127334	8.35931	0.014471	0.0381813	1.8395	0.391438	1.41815
AAAT_MOUSE|P51912_K384	Early-Uninfected	0.533436	0.161425	8.35931	0.0101441	0.083227	1.99379	0.533436	1.07974
AAAT_MOUSE|P51912_K384	Late-Uninfected	0.325783	0.161425	8.35931	0.076756	0.231274	1.11489	0.325783	0.635872
AAAT_MOUSE|P51912_K502	KO_Early-WT_Early	-0.44909	0.143321	19.3593	0.00538175	0.0361555	2.26908	0.44909	1.44183
AAAT_MOUSE|P51912_K502	KO_Late-WT_Late	-0.441367	0.143321	19.3593	0.0060735	0.0503909	2.21656	0.441367	1.29765
AAAT_MOUSE|P51912_K502	KO_Uninfected-WT_Uninfected	-0.641953	0.165493	19.3593	0.000981141	0.0184827	3.00827	0.641953	1.73324
AAAT_MOUSE|P51912_K502	KO_Early-KO_Uninfected	0.252634	0.154804	19.3593	0.11885	0.483117	0.925003	0.252634	0.315948
AAAT_MOUSE|P51912_K502	KO_Late-KO_Uninfected	0.231027	0.154804	19.3593	0.151717	0.463026	0.818966	0.231027	0.334394
AAAT_MOUSE|P51912_K502	WT_Early-Wt_Uninfected	0.0597709	0.154804	19.3593	0.703629	0.874461	0.152656	0.0597709	0.0582594
AAAT_MOUSE|P51912_K502	WT_Late-Wt_Uninfected	0.0304414	0.154804	19.3593	0.846156	0.936371	0.0725498	0.0304414	0.0285521
AAAT_MOUSE|P51912_K502	Infected-Uninfected	0.143468	0.0970288	19.3593	0.15533	0.359269	0.808744	0.143468	0.44458
AAAT_MOUSE|P51912_K502	KO-WT	-0.510803	0.0872224	19.3593	1.13177e-05	0.000190465	4.94624	0.510803	3.72018
AAAT_MOUSE|P51912_K502	Early-Uninfected	0.156202	0.109463	19.3593	0.169515	0.439751	0.770792	0.156202	0.356794
AAAT_MOUSE|P51912_K502	Late-Uninfected	0.130734	0.109463	19.3593	0.246781	0.46391	0.607688	0.130734	0.333566
AAAT_MOUSE|P51912_K549	KO_Early-WT_Early	-0.243427	0.282687	8.35931	0.41319	0.582039	0.38385	0.243427	0.235048
AAAT_MOUSE|P51912_K549	KO_Late-WT_Late	-0.216741	0.282687	8.35931	0.464349	0.662525	0.333155	0.216741	0.178797
AAAT_MOUSE|P51912_K549	KO_Uninfected-WT_Uninfected	-0.406055	0.346219	8.35931	0.273201	0.482322	0.563517	0.406055	0.316663
AAAT_MOUSE|P51912_K549	KO_Early-KO_Uninfected	-0.365598	0.282687	8.35931	0.230502	0.627076	0.637325	0.365598	0.20268
AAAT_MOUSE|P51912_K549	KO_Late-KO_Uninfected	0.0914766	0.282687	8.35931	0.754191	0.916012	0.122519	0.0914766	0.0380988
AAAT_MOUSE|P51912_K549	WT_Early-Wt_Uninfected	-0.528226	0.346219	8.35931	0.163987	0.434722	0.78519	0.528226	0.361789
AAAT_MOUSE|P51912_K549	WT_Late-Wt_Uninfected	-0.0978367	0.346219	8.35931	0.784366	0.906353	0.105481	0.0978367	0.0427029
AAAT_MOUSE|P51912_K549	Infected-Uninfected	-0.225046	0.19989	8.35931	0.291512	0.5191	0.535344	0.225046	0.284749
AAAT_MOUSE|P51912_K549	KO-WT	-0.288741	0.176286	8.35931	0.138449	0.222352	0.85871	0.288741	0.652958
AAAT_MOUSE|P51912_K549	Early-Uninfected	-0.446912	0.223484	8.35931	0.079013	0.29194	1.1023	0.446912	0.534706
AAAT_MOUSE|P51912_K549	Late-Uninfected	-0.00318004	0.223484	8.35931	0.988981	0.994751	0.00481217	0.00318004	0.00228564
AAGAB_MOUSE|Q8R2R3_K291	KO_Early-WT_Early	-0.369491	0.181041	8.35931	0.0740531	0.191564	1.13046	0.369491	0.717685
AAGAB_MOUSE|Q8R2R3_K291	KO_Late-WT_Late	-0.276915	0.181041	8.35931	0.16304	0.34733	0.787705	0.276915	0.459257
AAGAB_MOUSE|Q8R2R3_K291	KO_Uninfected-WT_Uninfected	-0.715047	0.22173	8.35931	0.0114625	0.0809181	1.94072	0.715047	1.09195
AAGAB_MOUSE|Q8R2R3_K291	KO_Early-KO_Uninfected	-0.0853447	0.181041	8.35931	0.649407	0.888046	0.187483	0.0853447	0.0515647
AAGAB_MOUSE|Q8R2R3_K291	KO_Late-KO_Uninfected	-0.281915	0.181041	8.35931	0.156424	0.470238	0.805696	0.281915	0.327682
AAGAB_MOUSE|Q8R2R3_K291	WT_Early-Wt_Uninfected	-0.430901	0.22173	8.35931	0.0863286	0.312742	1.06385	0.430901	0.504814
AAGAB_MOUSE|Q8R2R3_K291	WT_Late-Wt_Uninfected	-0.720046	0.22173	8.35931	0.0110722	0.0860785	1.95577	0.720046	1.06511
AAGAB_MOUSE|Q8R2R3_K291	Infected-Uninfected	-0.379552	0.128016	8.35931	0.0171563	0.0915243	1.76558	0.379552	1.03846
AAGAB_MOUSE|Q8R2R3_K291	KO-WT	-0.453818	0.112899	8.35931	0.0035114	0.0130792	2.45452	0.453818	1.88342
AAGAB_MOUSE|Q8R2R3_K291	Early-Uninfected	-0.258123	0.143126	8.35931	0.107366	0.343436	0.969133	0.258123	0.464154
AAGAB_MOUSE|Q8R2R3_K291	Late-Uninfected	-0.50098	0.143126	8.35931	0.00753735	0.0496601	2.12278	0.50098	1.30399
AAKG1_MOUSE|O54950_K233	KO_Early-WT_Early	-0.77434	0.191287	8.35931	0.00337148	0.0273976	2.47218	0.77434	1.56229
AAKG1_MOUSE|O54950_K233	KO_Late-WT_Late	-0.761095	0.191287	8.35931	0.0037238	0.0372817	2.42901	0.761095	1.4285
AAKG1_MOUSE|O54950_K233	KO_Uninfected-WT_Uninfected	-0.0259886	0.234277	8.35931	0.914289	0.959426	0.0389167	0.0259886	0.0179887
AAKG1_MOUSE|O54950_K233	KO_Early-KO_Uninfected	0.453392	0.191287	8.35931	0.0439339	0.313788	1.3572	0.453392	0.503363
AAKG1_MOUSE|O54950_K233	KO_Late-KO_Uninfected	0.157073	0.191287	8.35931	0.434358	0.73545	0.362152	0.157073	0.133447
AAKG1_MOUSE|O54950_K233	WT_Early-Wt_Uninfected	1.20174	0.234277	8.35931	0.000781654	0.0192669	3.10699	1.20174	1.71519
AAKG1_MOUSE|O54950_K233	WT_Late-Wt_Uninfected	0.892179	0.234277	8.35931	0.00477087	0.050423	2.3214	0.892179	1.29737
AAKG1_MOUSE|O54950_K233	Infected-Uninfected	0.676097	0.13526	8.35931	0.000924737	0.0116814	3.03398	0.676097	1.93251
AAKG1_MOUSE|O54950_K233	KO-WT	-0.520474	0.119288	8.35931	0.00216369	0.00912568	2.6648	0.520474	2.03973
AAKG1_MOUSE|O54950_K233	Early-Uninfected	0.827567	0.151225	8.35931	0.000509393	0.0102591	3.29295	0.827567	1.98889
AAKG1_MOUSE|O54950_K233	Late-Uninfected	0.524626	0.151225	8.35931	0.00789927	0.0513176	2.10241	0.524626	1.28973
AAPK1_MOUSE|Q5EG47_K448	KO_Early-WT_Early	-0.275822	0.246669	8.35931	0.29459	0.469517	0.530782	0.275822	0.328349
AAPK1_MOUSE|Q5EG47_K448	KO_Late-WT_Late	-0.400568	0.246669	8.35931	0.141426	0.317899	0.84947	0.400568	0.497711
AAPK1_MOUSE|Q5EG47_K448	KO_Uninfected-WT_Uninfected	-0.396543	0.302107	8.35931	0.224212	0.428556	0.649341	0.396543	0.367992
AAPK1_MOUSE|Q5EG47_K448	KO_Early-KO_Uninfected	0.0988274	0.246669	8.35931	0.698725	0.90655	0.155693	0.0988274	0.0426085
AAPK1_MOUSE|Q5EG47_K448	KO_Late-KO_Uninfected	0.166649	0.246669	8.35931	0.517547	0.787067	0.286051	0.166649	0.103988
AAPK1_MOUSE|Q5EG47_K448	WT_Early-Wt_Uninfected	-0.0218931	0.302107	8.35931	0.943934	0.979945	0.0250586	0.0218931	0.00879839
AAPK1_MOUSE|Q5EG47_K448	WT_Late-Wt_Uninfected	0.170674	0.302107	8.35931	0.586948	0.795717	0.2314	0.170674	0.0992413
AAPK1_MOUSE|Q5EG47_K448	Infected-Uninfected	0.103564	0.174422	8.35931	0.568389	0.758544	0.245354	0.103564	0.120019
AAPK1_MOUSE|Q5EG47_K448	KO-WT	-0.357644	0.153825	8.35931	0.047209	0.0953311	1.32597	0.357644	1.02077
AAPK1_MOUSE|Q5EG47_K448	Early-Uninfected	0.0384672	0.195009	8.35931	0.848338	0.940876	0.0714312	0.0384672	0.0264677
AAPK1_MOUSE|Q5EG47_K448	Late-Uninfected	0.168662	0.195009	8.35931	0.411231	0.62492	0.385914	0.168662	0.204176
AAPK1_MOUSE|Q5EG47_K45	KO_Early-WT_Early	-0.293907	0.211164	8.35931	0.199886	0.365446	0.699217	0.293907	0.437176
AAPK1_MOUSE|Q5EG47_K45	KO_Late-WT_Late	-0.0613553	0.211164	8.35931	0.778469	0.882972	0.108759	0.0613553	0.0540531
AAPK1_MOUSE|Q5EG47_K45	KO_Uninfected-WT_Uninfected	0.275694	0.258622	8.35931	0.316239	0.52366	0.499985	0.275694	0.280951
AAPK1_MOUSE|Q5EG47_K45	KO_Early-KO_Uninfected	-0.491639	0.211164	8.35931	0.0469673	0.324358	1.3282	0.491639	0.488976
AAPK1_MOUSE|Q5EG47_K45	KO_Late-KO_Uninfected	-0.345004	0.211164	8.35931	0.139313	0.444934	0.856009	0.345004	0.351704
AAPK1_MOUSE|Q5EG47_K45	WT_Early-Wt_Uninfected	0.0779613	0.258622	8.35931	0.770436	0.903848	0.113264	0.0779613	0.0439044
AAPK1_MOUSE|Q5EG47_K45	WT_Late-Wt_Uninfected	-0.00795542	0.258622	8.35931	0.976182	0.992137	0.0104691	0.00795542	0.00342849
AAPK1_MOUSE|Q5EG47_K45	Infected-Uninfected	-0.191659	0.149316	8.35931	0.233724	0.458486	0.631297	0.191659	0.338674
AAPK1_MOUSE|Q5EG47_K45	KO-WT	-0.0265229	0.131684	8.35931	0.845191	0.891104	0.0730453	0.0265229	0.0500714
AAPK1_MOUSE|Q5EG47_K45	Early-Uninfected	-0.206839	0.16694	8.35931	0.249004	0.533855	0.603794	0.206839	0.272576
AAPK1_MOUSE|Q5EG47_K45	Late-Uninfected	-0.17648	0.16694	8.35931	0.320036	0.541079	0.494801	0.17648	0.266739
AASD1_MOUSE|Q3THG9_K376	KO_Early-WT_Early	-0.949376	0.216414	19.3593	0.000304825	0.00595166	3.51595	0.949376	2.22536
AASD1_MOUSE|Q3THG9_K376	KO_Late-WT_Late	-0.874374	0.216414	19.3593	0.000676721	0.0135112	3.16959	0.874374	1.86931
AASD1_MOUSE|Q3THG9_K376	KO_Uninfected-WT_Uninfected	-0.533055	0.249894	19.3593	0.0459197	0.17339	1.338	0.533055	0.760977
AASD1_MOUSE|Q3THG9_K376	KO_Early-KO_Uninfected	-0.858483	0.233754	19.3593	0.00157745	0.0444509	2.80205	0.858483	1.35212
AASD1_MOUSE|Q3THG9_K376	KO_Late-KO_Uninfected	-0.520107	0.233754	19.3593	0.0381525	0.231734	1.41848	0.520107	0.63501
AASD1_MOUSE|Q3THG9_K376	WT_Early-Wt_Uninfected	-0.442162	0.233754	19.3593	0.0736055	0.288579	1.13309	0.442162	0.539736
AASD1_MOUSE|Q3THG9_K376	WT_Late-Wt_Uninfected	-0.178788	0.233754	19.3593	0.453581	0.703226	0.343345	0.178788	0.152905
AASD1_MOUSE|Q3THG9_K376	Infected-Uninfected	-0.499885	0.146513	19.3593	0.00286474	0.0271408	2.54291	0.499885	1.56638
AASD1_MOUSE|Q3THG9_K376	KO-WT	-0.785602	0.131705	19.3593	8.95313e-06	0.000160716	5.04803	0.785602	3.79394
AASD1_MOUSE|Q3THG9_K376	Early-Uninfected	-0.650322	0.165289	19.3593	0.000863567	0.0149332	3.0637	0.650322	1.82585
AASD1_MOUSE|Q3THG9_K376	Late-Uninfected	-0.349447	0.165289	19.3593	0.0476923	0.171706	1.32155	0.349447	0.765215
AATC_MOUSE|P05201_K33	KO_Early-WT_Early	0.109889	0.24959	8.35931	0.6709	0.793287	0.173342	0.109889	0.10057
AATC_MOUSE|P05201_K33	KO_Late-WT_Late	0.0330597	0.24959	8.35931	0.897757	0.948168	0.0468413	0.0330597	0.0231149
AATC_MOUSE|P05201_K33	KO_Uninfected-WT_Uninfected	-0.0388206	0.305685	8.35931	0.901946	0.953395	0.0448196	0.0388206	0.0207271
AATC_MOUSE|P05201_K33	KO_Early-KO_Uninfected	-0.0267637	0.24959	8.35931	0.917135	0.977468	0.0375666	0.0267637	0.00989736
AATC_MOUSE|P05201_K33	KO_Late-KO_Uninfected	0.927088	0.24959	8.35931	0.00547646	0.0755705	2.2615	0.927088	1.12165
AATC_MOUSE|P05201_K33	WT_Early-Wt_Uninfected	-0.175473	0.305685	8.35931	0.581059	0.8039	0.23578	0.175473	0.0947981
AATC_MOUSE|P05201_K33	WT_Late-Wt_Uninfected	0.855208	0.305685	8.35931	0.0223067	0.131615	1.65156	0.855208	0.880696
AATC_MOUSE|P05201_K33	Infected-Uninfected	0.395015	0.176487	8.35931	0.0541895	0.189418	1.26609	0.395015	0.72258
AATC_MOUSE|P05201_K33	KO-WT	0.0347093	0.155647	8.35931	0.828888	0.879062	0.0815039	0.0347093	0.0559807
AATC_MOUSE|P05201_K33	Early-Uninfected	-0.101118	0.197319	8.35931	0.621591	0.830113	0.206495	0.101118	0.0808629
AATC_MOUSE|P05201_K33	Late-Uninfected	0.891148	0.197319	8.35931	0.00175335	0.0174502	2.75613	0.891148	1.7582
AATF_MOUSE|Q9JKX4_K349	KO_Early-WT_Early	-0.447088	0.297702	8.35931	0.169945	0.328772	0.769692	0.447088	0.483105
AATF_MOUSE|Q9JKX4_K349	KO_Late-WT_Late	-0.340118	0.297702	8.35931	0.284921	0.492539	0.545276	0.340118	0.307559
AATF_MOUSE|Q9JKX4_K349	KO_Uninfected-WT_Uninfected	0.106291	0.364609	8.35931	0.777757	0.882921	0.109156	0.106291	0.0540784
AATF_MOUSE|Q9JKX4_K349	KO_Early-KO_Uninfected	-0.251746	0.297702	8.35931	0.421303	0.777469	0.375405	0.251746	0.109317
AATF_MOUSE|Q9JKX4_K349	KO_Late-KO_Uninfected	-0.431008	0.297702	8.35931	0.18412	0.508024	0.734898	0.431008	0.294116
AATF_MOUSE|Q9JKX4_K349	WT_Early-Wt_Uninfected	0.301633	0.364609	8.35931	0.43106	0.700961	0.365462	0.301633	0.154306
AATF_MOUSE|Q9JKX4_K349	WT_Late-Wt_Uninfected	0.0154011	0.364609	8.35931	0.967299	0.988052	0.0144393	0.0154011	0.00522019
AATF_MOUSE|Q9JKX4_K349	Infected-Uninfected	-0.09143	0.210507	8.35931	0.675041	0.825606	0.17067	0.09143	0.0832269
AATF_MOUSE|Q9JKX4_K349	KO-WT	-0.226972	0.18565	8.35931	0.254837	0.358775	0.593737	0.226972	0.445178
AATF_MOUSE|Q9JKX4_K349	Early-Uninfected	0.0249436	0.235354	8.35931	0.918095	0.969347	0.0371124	0.0249436	0.0135209
AATF_MOUSE|Q9JKX4_K349	Late-Uninfected	-0.207804	0.235354	8.35931	0.401946	0.617061	0.395832	0.207804	0.209672
AB17A_MOUSE|Q99JW1_K226	KO_Early-WT_Early	-0.537325	0.125075	19.3593	0.000375581	0.00676508	3.4253	0.537325	2.16973
AB17A_MOUSE|Q99JW1_K226	KO_Late-WT_Late	-0.603889	0.125075	19.3593	0.0001112	0.00453305	3.9539	0.603889	2.34361
AB17A_MOUSE|Q99JW1_K226	KO_Uninfected-WT_Uninfected	-0.292462	0.144425	19.3593	0.0568795	0.19623	1.24504	0.292462	0.707235
AB17A_MOUSE|Q99JW1_K226	KO_Early-KO_Uninfected	-0.203664	0.135097	19.3593	0.147817	0.526653	0.830275	0.203664	0.278475
AB17A_MOUSE|Q99JW1_K226	KO_Late-KO_Uninfected	-0.186874	0.135097	19.3593	0.182331	0.505701	0.739139	0.186874	0.296106
AB17A_MOUSE|Q99JW1_K226	WT_Early-Wt_Uninfected	0.0411995	0.135097	19.3593	0.763649	0.902011	0.117106	0.0411995	0.0447884
AB17A_MOUSE|Q99JW1_K226	WT_Late-Wt_Uninfected	0.124553	0.135097	19.3593	0.367899	0.631221	0.434272	0.124553	0.199818
AB17A_MOUSE|Q99JW1_K226	Infected-Uninfected	-0.0561963	0.0846764	19.3593	0.514734	0.716274	0.288417	0.0561963	0.144921
AB17A_MOUSE|Q99JW1_K226	KO-WT	-0.477892	0.0761184	19.3593	4.58711e-06	9.69738e-05	5.33846	0.477892	4.01335
AB17A_MOUSE|Q99JW1_K226	Early-Uninfected	-0.0812324	0.0955278	19.3593	0.405523	0.677263	0.391984	0.0812324	0.169243
AB17A_MOUSE|Q99JW1_K226	Late-Uninfected	-0.0311602	0.0955278	19.3593	0.74778	0.866805	0.126226	0.0311602	0.0620786
AB17B_MOUSE|Q7M759_K207	KO_Early-WT_Early	0.0238717	0.246486	19.3593	0.923843	0.957633	0.034402	0.0238717	0.018801
AB17B_MOUSE|Q7M759_K207	KO_Late-WT_Late	-0.346219	0.246486	19.3593	0.175977	0.363745	0.754544	0.346219	0.439203
AB17B_MOUSE|Q7M759_K207	KO_Uninfected-WT_Uninfected	0.0893113	0.284618	19.3593	0.757034	0.867253	0.120885	0.0893113	0.0618543
AB17B_MOUSE|Q7M759_K207	KO_Early-KO_Uninfected	0.152604	0.266236	19.3593	0.573113	0.854489	0.24176	0.152604	0.0682934
AB17B_MOUSE|Q7M759_K207	KO_Late-KO_Uninfected	0.0916011	0.266236	19.3593	0.73451	0.90684	0.134002	0.0916011	0.0424693
AB17B_MOUSE|Q7M759_K207	WT_Early-Wt_Uninfected	0.218044	0.266236	19.3593	0.422761	0.696169	0.373905	0.218044	0.157285
AB17B_MOUSE|Q7M759_K207	WT_Late-Wt_Uninfected	0.527132	0.266236	19.3593	0.0621045	0.239951	1.20688	0.527132	0.619877
AB17B_MOUSE|Q7M759_K207	Infected-Uninfected	0.247345	0.166872	19.3593	0.154371	0.358331	0.811434	0.247345	0.445715
AB17B_MOUSE|Q7M759_K207	KO-WT	-0.0776787	0.150007	19.3593	0.610441	0.704253	0.214356	0.0776787	0.152271
AB17B_MOUSE|Q7M759_K207	Early-Uninfected	0.185324	0.188257	19.3593	0.337053	0.619101	0.472301	0.185324	0.208239
AB17B_MOUSE|Q7M759_K207	Late-Uninfected	0.309366	0.188257	19.3593	0.11646	0.302086	0.933823	0.309366	0.51987
AB17C_MOUSE|Q8VCV1_K239	KO_Early-WT_Early	-0.28201	0.221962	19.3593	0.218952	0.388491	0.659651	0.28201	0.410619
AB17C_MOUSE|Q8VCV1_K239	KO_Late-WT_Late	-0.313488	0.221962	19.3593	0.173722	0.360625	0.760146	0.313488	0.442944
AB17C_MOUSE|Q8VCV1_K239	KO_Uninfected-WT_Uninfected	0.212421	0.2563	19.3593	0.417319	0.616338	0.379532	0.212421	0.210181
AB17C_MOUSE|Q8VCV1_K239	KO_Early-KO_Uninfected	0.319562	0.239747	19.3593	0.198035	0.592136	0.703259	0.319562	0.227579
AB17C_MOUSE|Q8VCV1_K239	KO_Late-KO_Uninfected	0.628638	0.239747	19.3593	0.0166078	0.14697	1.77969	0.628638	0.832771
AB17C_MOUSE|Q8VCV1_K239	WT_Early-Wt_Uninfected	0.813994	0.239747	19.3593	0.00297552	0.0448936	2.52644	0.813994	1.34782
AB17C_MOUSE|Q8VCV1_K239	WT_Late-Wt_Uninfected	1.15455	0.239747	19.3593	0.000114403	0.00375386	3.94156	1.15455	2.42552
AB17C_MOUSE|Q8VCV1_K239	Infected-Uninfected	0.729185	0.150269	19.3593	0.000105227	0.00238203	3.97787	0.729185	2.62305
AB17C_MOUSE|Q8VCV1_K239	KO-WT	-0.127692	0.135082	19.3593	0.356158	0.467951	0.448357	0.127692	0.3298
AB17C_MOUSE|Q8VCV1_K239	Early-Uninfected	0.566778	0.169526	19.3593	0.00334865	0.0398373	2.47513	0.566778	1.39971
AB17C_MOUSE|Q8VCV1_K239	Late-Uninfected	0.891592	0.169526	19.3593	4.21073e-05	0.00104068	4.37564	0.891592	2.98268
AB1IP_MOUSE|Q8R5A3_K257	KO_Early-WT_Early	0.750312	0.297648	8.35931	0.0345807	0.118422	1.46117	0.750312	0.926568
AB1IP_MOUSE|Q8R5A3_K257	KO_Late-WT_Late	1.0076	0.297648	8.35931	0.00897044	0.0633717	2.04719	1.0076	1.1981
AB1IP_MOUSE|Q8R5A3_K257	KO_Uninfected-WT_Uninfected	0.798427	0.364543	8.35931	0.0584781	0.199172	1.23301	0.798427	0.700771
AB1IP_MOUSE|Q8R5A3_K257	KO_Early-KO_Uninfected	0.0588499	0.297648	8.35931	0.847991	0.957855	0.0716089	0.0588499	0.0187003
AB1IP_MOUSE|Q8R5A3_K257	KO_Late-KO_Uninfected	0.171483	0.297648	8.35931	0.579707	0.825157	0.236792	0.171483	0.0834637
AB1IP_MOUSE|Q8R5A3_K257	WT_Early-Wt_Uninfected	0.106964	0.364543	8.35931	0.776354	0.907254	0.10994	0.106964	0.0422709
AB1IP_MOUSE|Q8R5A3_K257	WT_Late-Wt_Uninfected	-0.0376895	0.364543	8.35931	0.920092	0.968364	0.0361685	0.0376895	0.0139614
AB1IP_MOUSE|Q8R5A3_K257	Infected-Uninfected	0.074902	0.210469	8.35931	0.730744	0.858081	0.136235	0.074902	0.0664715
AB1IP_MOUSE|Q8R5A3_K257	KO-WT	0.852113	0.185616	8.35931	0.00158497	0.00729527	2.79998	0.852113	2.13696
AB1IP_MOUSE|Q8R5A3_K257	Early-Uninfected	0.0829071	0.235312	8.35931	0.73331	0.888582	0.134712	0.0829071	0.0513025
AB1IP_MOUSE|Q8R5A3_K257	Late-Uninfected	0.0668969	0.235312	8.35931	0.783103	0.88753	0.106181	0.0668969	0.0518172
AB1IP_MOUSE|Q8R5A3_K263	KO_Early-WT_Early	1.07812	0.341861	19.3593	0.00514251	0.0352398	2.28883	1.07812	1.45297
AB1IP_MOUSE|Q8R5A3_K263	KO_Late-WT_Late	0.833242	0.341861	19.3593	0.0245952	0.110525	1.60915	0.833242	0.956539
AB1IP_MOUSE|Q8R5A3_K263	KO_Uninfected-WT_Uninfected	1.59386	0.394747	19.3593	0.000680784	0.0149437	3.16699	1.59386	1.82554
AB1IP_MOUSE|Q8R5A3_K263	KO_Early-KO_Uninfected	-0.0670346	0.369252	19.3593	0.85783	0.959077	0.0665989	0.0670346	0.0181466
AB1IP_MOUSE|Q8R5A3_K263	KO_Late-KO_Uninfected	-0.0159655	0.369252	19.3593	0.965955	0.991495	0.0150431	0.0159655	0.00370965
AB1IP_MOUSE|Q8R5A3_K263	WT_Early-Wt_Uninfected	0.448711	0.369252	19.3593	0.238906	0.525345	0.621773	0.448711	0.279556
AB1IP_MOUSE|Q8R5A3_K263	WT_Late-Wt_Uninfected	0.744654	0.369252	19.3593	0.0578174	0.230347	1.23794	0.744654	0.637618
AB1IP_MOUSE|Q8R5A3_K263	Infected-Uninfected	0.277591	0.231441	19.3593	0.244845	0.470735	0.611109	0.277591	0.327224
AB1IP_MOUSE|Q8R5A3_K263	KO-WT	1.16841	0.20805	19.3593	1.91149e-05	0.000283866	4.71863	1.16841	3.54689
AB1IP_MOUSE|Q8R5A3_K263	Early-Uninfected	0.190838	0.2611	19.3593	0.473594	0.728622	0.324594	0.190838	0.137497
AB1IP_MOUSE|Q8R5A3_K263	Late-Uninfected	0.364344	0.2611	19.3593	0.178692	0.387943	0.747896	0.364344	0.411233
AB1IP_MOUSE|Q8R5A3_K281	KO_Early-WT_Early	-0.134283	0.178774	19.3593	0.461608	0.626023	0.335726	0.134283	0.20341
AB1IP_MOUSE|Q8R5A3_K281	KO_Late-WT_Late	-0.0645951	0.178774	19.3593	0.721772	0.849617	0.1416	0.0645951	0.0707768
AB1IP_MOUSE|Q8R5A3_K281	KO_Uninfected-WT_Uninfected	0.05954	0.206431	19.3593	0.776086	0.881575	0.11009	0.05954	0.0547405
AB1IP_MOUSE|Q8R5A3_K281	KO_Early-KO_Uninfected	0.169889	0.193098	19.3593	0.389754	0.756508	0.409209	0.169889	0.121187
AB1IP_MOUSE|Q8R5A3_K281	KO_Late-KO_Uninfected	0.00057508	0.193098	19.3593	0.997654	0.999315	0.00101995	0.00057508	0.000297645
AB1IP_MOUSE|Q8R5A3_K281	WT_Early-Wt_Uninfected	0.363712	0.193098	19.3593	0.0747358	0.290419	1.12647	0.363712	0.536976
AB1IP_MOUSE|Q8R5A3_K281	WT_Late-Wt_Uninfected	0.12471	0.193098	19.3593	0.525967	0.75451	0.279042	0.12471	0.122335
AB1IP_MOUSE|Q8R5A3_K281	Infected-Uninfected	0.164722	0.121031	19.3593	0.189151	0.40364	0.723192	0.164722	0.394006
AB1IP_MOUSE|Q8R5A3_K281	KO-WT	-0.0464459	0.108799	19.3593	0.674163	0.758076	0.171235	0.0464459	0.120287
AB1IP_MOUSE|Q8R5A3_K281	Early-Uninfected	0.266801	0.136541	19.3593	0.0653031	0.261801	1.18507	0.266801	0.582029
AB1IP_MOUSE|Q8R5A3_K281	Late-Uninfected	0.0626426	0.136541	19.3593	0.6515	0.80841	0.186086	0.0626426	0.0923686
AB1IP_MOUSE|Q8R5A3_K424	KO_Early-WT_Early	-0.262634	0.16836	19.3593	0.134968	0.282721	0.869768	0.262634	0.548642
AB1IP_MOUSE|Q8R5A3_K424	KO_Late-WT_Late	-0.0626448	0.16836	19.3593	0.713869	0.843996	0.146382	0.0626448	0.0736594
AB1IP_MOUSE|Q8R5A3_K424	KO_Uninfected-WT_Uninfected	-0.200467	0.194405	19.3593	0.315166	0.52301	0.50146	0.200467	0.28149
AB1IP_MOUSE|Q8R5A3_K424	KO_Early-KO_Uninfected	-0.153354	0.181849	19.3593	0.409359	0.76846	0.387896	0.153354	0.114379
AB1IP_MOUSE|Q8R5A3_K424	KO_Late-KO_Uninfected	-0.387877	0.181849	19.3593	0.0459357	0.255198	1.33785	0.387877	0.593122
AB1IP_MOUSE|Q8R5A3_K424	WT_Early-Wt_Uninfected	-0.0911871	0.181849	19.3593	0.621714	0.828143	0.206409	0.0911871	0.0818949
AB1IP_MOUSE|Q8R5A3_K424	WT_Late-Wt_Uninfected	-0.525699	0.181849	19.3593	0.00924253	0.0767535	2.03421	0.525699	1.1149
AB1IP_MOUSE|Q8R5A3_K424	Infected-Uninfected	-0.289529	0.11398	19.3593	0.0197895	0.0998944	1.70357	0.289529	1.00046
AB1IP_MOUSE|Q8R5A3_K424	KO-WT	-0.175249	0.102461	19.3593	0.10317	0.176942	0.986446	0.175249	0.752169
AB1IP_MOUSE|Q8R5A3_K424	Early-Uninfected	-0.122271	0.128587	19.3593	0.353388	0.6343	0.451749	0.122271	0.197705
AB1IP_MOUSE|Q8R5A3_K424	Late-Uninfected	-0.456788	0.128587	19.3593	0.00207821	0.0199342	2.68231	0.456788	1.7004
AB1IP_MOUSE|Q8R5A3_K87	KO_Early-WT_Early	-0.410502	0.172263	8.35931	0.0430504	0.136488	1.36602	0.410502	0.864904
AB1IP_MOUSE|Q8R5A3_K87	KO_Late-WT_Late	-0.370131	0.172263	8.35931	0.0624606	0.195323	1.20439	0.370131	0.709247
AB1IP_MOUSE|Q8R5A3_K87	KO_Uninfected-WT_Uninfected	-0.161182	0.210978	8.35931	0.465897	0.655568	0.33171	0.161182	0.183382
AB1IP_MOUSE|Q8R5A3_K87	KO_Early-KO_Uninfected	-0.0618116	0.172263	8.35931	0.728623	0.921446	0.137497	0.0618116	0.0355299
AB1IP_MOUSE|Q8R5A3_K87	KO_Late-KO_Uninfected	-0.685846	0.172263	8.35931	0.00371	0.0587513	2.43063	0.685846	1.23098
AB1IP_MOUSE|Q8R5A3_K87	WT_Early-Wt_Uninfected	0.187508	0.210978	8.35931	0.398986	0.676774	0.399043	0.187508	0.169556
AB1IP_MOUSE|Q8R5A3_K87	WT_Late-Wt_Uninfected	-0.476897	0.210978	8.35931	0.052312	0.218591	1.2814	0.476897	0.660368
AB1IP_MOUSE|Q8R5A3_K87	Infected-Uninfected	-0.259262	0.121808	8.35931	0.0644903	0.208545	1.19051	0.259262	0.6808
AB1IP_MOUSE|Q8R5A3_K87	KO-WT	-0.313938	0.107425	8.35931	0.018336	0.0456592	1.7367	0.313938	1.34047
AB1IP_MOUSE|Q8R5A3_K87	Early-Uninfected	0.0628482	0.136186	8.35931	0.65622	0.847593	0.182951	0.0628482	0.0718127
AB1IP_MOUSE|Q8R5A3_K87	Late-Uninfected	-0.581371	0.136186	8.35931	0.00246674	0.0227385	2.60788	0.581371	1.64324
ABCA1_MOUSE|P41233_K1153	KO_Early-WT_Early	0.448319	0.356	8.35931	0.241939	0.414101	0.616294	0.448319	0.382894
ABCA1_MOUSE|P41233_K1153	KO_Late-WT_Late	0.108308	0.356	8.35931	0.768384	0.876782	0.114422	0.108308	0.0571083
ABCA1_MOUSE|P41233_K1153	KO_Uninfected-WT_Uninfected	0.148981	0.436009	8.35931	0.741014	0.85789	0.130173	0.148981	0.0665685
ABCA1_MOUSE|P41233_K1153	KO_Early-KO_Uninfected	-0.037196	0.356	8.35931	0.91925	0.978714	0.0365665	0.037196	0.00934421
ABCA1_MOUSE|P41233_K1153	KO_Late-KO_Uninfected	0.0822863	0.356	8.35931	0.822762	0.939172	0.0847255	0.0822863	0.0272549
ABCA1_MOUSE|P41233_K1153	WT_Early-Wt_Uninfected	-0.336534	0.436009	8.35931	0.461464	0.721941	0.335862	0.336534	0.141498
ABCA1_MOUSE|P41233_K1153	WT_Late-Wt_Uninfected	0.122959	0.436009	8.35931	0.784792	0.906539	0.105245	0.122959	0.0426137
ABCA1_MOUSE|P41233_K1153	Infected-Uninfected	-0.0421212	0.25173	8.35931	0.87109	0.938686	0.0599369	0.0421212	0.0274795
ABCA1_MOUSE|P41233_K1153	KO-WT	0.235203	0.222005	8.35931	0.319046	0.429424	0.496146	0.235203	0.367113
ABCA1_MOUSE|P41233_K1153	Early-Uninfected	-0.186865	0.281443	8.35931	0.524607	0.767783	0.280166	0.186865	0.114762
ABCA1_MOUSE|P41233_K1153	Late-Uninfected	0.102623	0.281443	8.35931	0.72444	0.853774	0.139998	0.102623	0.0686569
ABCA1_MOUSE|P41233_K1314	KO_Early-WT_Early	-0.743864	0.234409	8.35931	0.0124091	0.0608682	1.90626	0.743864	1.21561
ABCA1_MOUSE|P41233_K1314	KO_Late-WT_Late	-1.14635	0.234409	8.35931	0.00106423	0.0176486	2.97297	1.14635	1.75329
ABCA1_MOUSE|P41233_K1314	KO_Uninfected-WT_Uninfected	-0.705469	0.287091	8.35931	0.0382527	0.157459	1.41734	0.705469	0.802831
ABCA1_MOUSE|P41233_K1314	KO_Early-KO_Uninfected	-0.10703	0.234409	8.35931	0.659593	0.891986	0.180724	0.10703	0.0496421
ABCA1_MOUSE|P41233_K1314	KO_Late-KO_Uninfected	0.161048	0.234409	8.35931	0.510667	0.78434	0.291863	0.161048	0.105495
ABCA1_MOUSE|P41233_K1314	WT_Early-Wt_Uninfected	-0.0686354	0.287091	8.35931	0.816807	0.928954	0.0878804	0.0686354	0.032006
ABCA1_MOUSE|P41233_K1314	WT_Late-Wt_Uninfected	0.601926	0.287091	8.35931	0.0678171	0.252948	1.16866	0.601926	0.596969
ABCA1_MOUSE|P41233_K1314	Infected-Uninfected	0.146827	0.165752	8.35931	0.400476	0.623315	0.397423	0.146827	0.205293
ABCA1_MOUSE|P41233_K1314	KO-WT	-0.865227	0.146179	8.35931	0.000298738	0.00216448	3.52471	0.865227	2.66465
ABCA1_MOUSE|P41233_K1314	Early-Uninfected	-0.0878326	0.185316	8.35931	0.647662	0.843568	0.188652	0.0878326	0.07388
ABCA1_MOUSE|P41233_K1314	Late-Uninfected	0.381487	0.185316	8.35931	0.0720197	0.222361	1.14255	0.381487	0.652941
ABCA1_MOUSE|P41233_K2023	KO_Early-WT_Early	0.382932	0.206368	8.35931	0.0990184	0.230555	1.00428	0.382932	0.637226
ABCA1_MOUSE|P41233_K2023	KO_Late-WT_Late	0.316651	0.206368	8.35931	0.161866	0.346198	0.790845	0.316651	0.460676
ABCA1_MOUSE|P41233_K2023	KO_Uninfected-WT_Uninfected	0.0699123	0.252748	8.35931	0.788798	0.888681	0.103034	0.0699123	0.0512542
ABCA1_MOUSE|P41233_K2023	KO_Early-KO_Uninfected	0.561876	0.206368	8.35931	0.0251098	0.238082	1.60016	0.561876	0.623274
ABCA1_MOUSE|P41233_K2023	KO_Late-KO_Uninfected	0.817529	0.206368	8.35931	0.00381788	0.0597409	2.41818	0.817529	1.22373
ABCA1_MOUSE|P41233_K2023	WT_Early-Wt_Uninfected	0.248857	0.252748	8.35931	0.352457	0.635354	0.452894	0.248857	0.196984
ABCA1_MOUSE|P41233_K2023	WT_Late-Wt_Uninfected	0.570791	0.252748	8.35931	0.0524847	0.219172	1.27997	0.570791	0.659215
ABCA1_MOUSE|P41233_K2023	Infected-Uninfected	0.549763	0.145924	8.35931	0.0050649	0.0404559	2.29543	0.549763	1.39302
ABCA1_MOUSE|P41233_K2023	KO-WT	0.256498	0.128693	8.35931	0.079844	0.14435	1.09776	0.256498	0.840582
ABCA1_MOUSE|P41233_K2023	Early-Uninfected	0.405366	0.163148	8.35931	0.0366255	0.185964	1.43622	0.405366	0.73057
ABCA1_MOUSE|P41233_K2023	Late-Uninfected	0.69416	0.163148	8.35931	0.00251619	0.0230489	2.59926	0.69416	1.63735
ABCA3_MOUSE|Q8R420_K1620	KO_Early-WT_Early	0.0398881	0.228375	19.3593	0.86316	0.918078	0.0639086	0.0398881	0.0371204
ABCA3_MOUSE|Q8R420_K1620	KO_Late-WT_Late	-0.0189898	0.228375	19.3593	0.934585	0.965439	0.0293814	0.0189898	0.0152754
ABCA3_MOUSE|Q8R420_K1620	KO_Uninfected-WT_Uninfected	-0.258546	0.263705	19.3593	0.338965	0.546286	0.469845	0.258546	0.26258
ABCA3_MOUSE|Q8R420_K1620	KO_Early-KO_Uninfected	-0.319613	0.246673	19.3593	0.210318	0.60415	0.677124	0.319613	0.218855
ABCA3_MOUSE|Q8R420_K1620	KO_Late-KO_Uninfected	-0.382964	0.246673	19.3593	0.136734	0.441258	0.864123	0.382964	0.355307
ABCA3_MOUSE|Q8R420_K1620	WT_Early-Wt_Uninfected	-0.618047	0.246673	19.3593	0.0213009	0.148759	1.6716	0.618047	0.827517
ABCA3_MOUSE|Q8R420_K1620	WT_Late-Wt_Uninfected	-0.62252	0.246673	19.3593	0.0204967	0.124971	1.68832	0.62252	0.90319
ABCA3_MOUSE|Q8R420_K1620	Infected-Uninfected	-0.485786	0.154611	19.3593	0.00527939	0.0413659	2.27742	0.485786	1.38336
ABCA3_MOUSE|Q8R420_K1620	KO-WT	-0.0792158	0.138985	19.3593	0.57526	0.674542	0.240136	0.0792158	0.170991
ABCA3_MOUSE|Q8R420_K1620	Early-Uninfected	-0.46883	0.174424	19.3593	0.01441	0.105006	1.84134	0.46883	0.978786
ABCA3_MOUSE|Q8R420_K1620	Late-Uninfected	-0.502742	0.174424	19.3593	0.00941878	0.0580211	2.02601	0.502742	1.23641
ABCA3_MOUSE|Q8R420_K1668	KO_Early-WT_Early	-0.416329	0.18103	8.35931	0.0491404	0.148481	1.30856	0.416329	0.82833
ABCA3_MOUSE|Q8R420_K1668	KO_Late-WT_Late	-0.269489	0.18103	8.35931	0.173305	0.360345	0.761188	0.269489	0.443281
ABCA3_MOUSE|Q8R420_K1668	KO_Uninfected-WT_Uninfected	-0.106455	0.221716	8.35931	0.643439	0.791017	0.191492	0.106455	0.101814
ABCA3_MOUSE|Q8R420_K1668	KO_Early-KO_Uninfected	-0.330623	0.18103	8.35931	0.103623	0.453667	0.984544	0.330623	0.343263
ABCA3_MOUSE|Q8R420_K1668	KO_Late-KO_Uninfected	-0.0175495	0.18103	8.35931	0.925056	0.980894	0.0338318	0.0175495	0.00837811
ABCA3_MOUSE|Q8R420_K1668	WT_Early-Wt_Uninfected	-0.0207497	0.221716	8.35931	0.927642	0.97506	0.0326197	0.0207497	0.0109686
ABCA3_MOUSE|Q8R420_K1668	WT_Late-Wt_Uninfected	0.145484	0.221716	8.35931	0.529356	0.757037	0.276252	0.145484	0.120883
ABCA3_MOUSE|Q8R420_K1668	Infected-Uninfected	-0.0558596	0.128008	8.35931	0.673616	0.825059	0.171588	0.0558596	0.083515
ABCA3_MOUSE|Q8R420_K1668	KO-WT	-0.264091	0.112892	8.35931	0.0461464	0.0935944	1.33586	0.264091	1.02875
ABCA3_MOUSE|Q8R420_K1668	Early-Uninfected	-0.175687	0.143117	8.35931	0.253051	0.538679	0.596791	0.175687	0.26867
ABCA3_MOUSE|Q8R420_K1668	Late-Uninfected	0.0639675	0.143117	8.35931	0.666259	0.818112	0.176357	0.0639675	0.0871871
ABCA3_MOUSE|Q8R420_K503	KO_Early-WT_Early	-0.230431	0.172207	19.3593	0.196368	0.361469	0.706929	0.230431	0.441929
ABCA3_MOUSE|Q8R420_K503	KO_Late-WT_Late	-0.26133	0.172207	19.3593	0.145293	0.322971	0.837756	0.26133	0.490836
ABCA3_MOUSE|Q8R420_K503	KO_Uninfected-WT_Uninfected	-0.866064	0.198848	19.3593	0.000327648	0.00954846	3.48459	0.866064	2.02007
ABCA3_MOUSE|Q8R420_K503	KO_Early-KO_Uninfected	0.264068	0.186005	19.3593	0.171602	0.562423	0.765477	0.264068	0.249937
ABCA3_MOUSE|Q8R420_K503	KO_Late-KO_Uninfected	0.215662	0.186005	19.3593	0.260377	0.5975	0.584397	0.215662	0.223662
ABCA3_MOUSE|Q8R420_K503	WT_Early-Wt_Uninfected	-0.371564	0.186005	19.3593	0.0600081	0.258276	1.22179	0.371564	0.587916
ABCA3_MOUSE|Q8R420_K503	WT_Late-Wt_Uninfected	-0.389071	0.186005	19.3593	0.0498683	0.213206	1.30218	0.389071	0.6712
ABCA3_MOUSE|Q8R420_K503	Infected-Uninfected	-0.0702263	0.116585	19.3593	0.553924	0.74822	0.25655	0.0702263	0.125971
ABCA3_MOUSE|Q8R420_K503	KO-WT	-0.452608	0.104802	19.3593	0.00035649	0.00247128	3.44795	0.452608	2.60708
ABCA3_MOUSE|Q8R420_K503	Early-Uninfected	-0.0537478	0.131525	19.3593	0.687282	0.86516	0.162865	0.0537478	0.0629034
ABCA3_MOUSE|Q8R420_K503	Late-Uninfected	-0.0867047	0.131525	19.3593	0.517517	0.712948	0.286075	0.0867047	0.146942
ABCA3_MOUSE|Q8R420_K512	KO_Early-WT_Early	0.408801	0.151034	8.35931	0.0257535	0.0971906	1.58916	0.408801	1.01238
ABCA3_MOUSE|Q8R420_K512	KO_Late-WT_Late	-0.0363505	0.151034	8.35931	0.815603	0.903851	0.088521	0.0363505	0.0439033
ABCA3_MOUSE|Q8R420_K512	KO_Uninfected-WT_Uninfected	-0.256382	0.184978	8.35931	0.201595	0.402433	0.695519	0.256382	0.395306
ABCA3_MOUSE|Q8R420_K512	KO_Early-KO_Uninfected	0.546014	0.151034	8.35931	0.00634565	0.113134	2.19752	0.546014	0.946406
ABCA3_MOUSE|Q8R420_K512	KO_Late-KO_Uninfected	0.471359	0.151034	8.35931	0.0134582	0.131247	1.87101	0.471359	0.881912
ABCA3_MOUSE|Q8R420_K512	WT_Early-Wt_Uninfected	-0.119169	0.184978	8.35931	0.536698	0.771994	0.27027	0.119169	0.112386
ABCA3_MOUSE|Q8R420_K512	WT_Late-Wt_Uninfected	0.251327	0.184978	8.35931	0.209772	0.469316	0.678252	0.251327	0.328535
ABCA3_MOUSE|Q8R420_K512	Infected-Uninfected	0.287383	0.106797	8.35931	0.0264038	0.12034	1.57833	0.287383	0.91959
ABCA3_MOUSE|Q8R420_K512	KO-WT	0.0386897	0.0941864	8.35931	0.691564	0.771955	0.160168	0.0386897	0.112408
ABCA3_MOUSE|Q8R420_K512	Early-Uninfected	0.213422	0.119403	8.35931	0.110068	0.34864	0.958338	0.213422	0.457622
ABCA3_MOUSE|Q8R420_K512	Late-Uninfected	0.361343	0.119403	8.35931	0.0155895	0.0828201	1.80717	0.361343	1.08186
ABCA3_MOUSE|Q8R420_K640	KO_Early-WT_Early	-0.0815998	0.143791	19.3593	0.576906	0.71962	0.238895	0.0815998	0.142897
ABCA3_MOUSE|Q8R420_K640	KO_Late-WT_Late	-0.00516322	0.143791	19.3593	0.971724	0.986279	0.0124572	0.00516322	0.00600032
ABCA3_MOUSE|Q8R420_K640	KO_Uninfected-WT_Uninfected	-0.40411	0.166036	19.3593	0.0247769	0.126216	1.60595	0.40411	0.898884
ABCA3_MOUSE|Q8R420_K640	KO_Early-KO_Uninfected	0.208888	0.155313	19.3593	0.194186	0.589518	0.711782	0.208888	0.229503
ABCA3_MOUSE|Q8R420_K640	KO_Late-KO_Uninfected	0.664089	0.155313	19.3593	0.000393433	0.0108779	3.40513	0.664089	1.96345
ABCA3_MOUSE|Q8R420_K640	WT_Early-Wt_Uninfected	-0.113623	0.155313	19.3593	0.473192	0.730109	0.324963	0.113623	0.136612
ABCA3_MOUSE|Q8R420_K640	WT_Late-Wt_Uninfected	0.265142	0.155313	19.3593	0.103783	0.322515	0.983872	0.265142	0.491451
ABCA3_MOUSE|Q8R420_K640	Infected-Uninfected	0.256124	0.0973473	19.3593	0.0162914	0.0878721	1.78804	0.256124	1.05615
ABCA3_MOUSE|Q8R420_K640	KO-WT	-0.163624	0.0875087	19.3593	0.0767116	0.140163	1.11514	0.163624	0.853366
ABCA3_MOUSE|Q8R420_K640	Early-Uninfected	0.0476327	0.109823	19.3593	0.669284	0.854802	0.17439	0.0476327	0.0681342
ABCA3_MOUSE|Q8R420_K640	Late-Uninfected	0.464615	0.109823	19.3593	0.000436574	0.00615293	3.35994	0.464615	2.21092
ABCD1_MOUSE|P48410_K264	KO_Early-WT_Early	0.321171	0.183202	8.35931	0.116058	0.256346	0.935324	0.321171	0.591174
ABCD1_MOUSE|P48410_K264	KO_Late-WT_Late	0.306984	0.183202	8.35931	0.130707	0.303497	0.8837	0.306984	0.517846
ABCD1_MOUSE|P48410_K264	KO_Uninfected-WT_Uninfected	0.279747	0.224376	8.35931	0.246279	0.453612	0.608573	0.279747	0.343316
ABCD1_MOUSE|P48410_K264	KO_Early-KO_Uninfected	0.338524	0.183202	8.35931	0.100221	0.449735	0.999041	0.338524	0.347043
ABCD1_MOUSE|P48410_K264	KO_Late-KO_Uninfected	0.0792646	0.183202	8.35931	0.676207	0.878389	0.169921	0.0792646	0.0563132
ABCD1_MOUSE|P48410_K264	WT_Early-Wt_Uninfected	0.2971	0.224376	8.35931	0.220523	0.50386	0.656545	0.2971	0.29769
ABCD1_MOUSE|P48410_K264	WT_Late-Wt_Uninfected	0.0520278	0.224376	8.35931	0.822209	0.925211	0.0850178	0.0520278	0.0337591
ABCD1_MOUSE|P48410_K264	Infected-Uninfected	0.191729	0.129543	8.35931	0.175535	0.386558	0.755637	0.191729	0.412786
ABCD1_MOUSE|P48410_K264	KO-WT	0.302634	0.114247	8.35931	0.0282175	0.0642506	1.54948	0.302634	1.19212
ABCD1_MOUSE|P48410_K264	Early-Uninfected	0.317812	0.144834	8.35931	0.0580981	0.242891	1.23584	0.317812	0.614588
ABCD1_MOUSE|P48410_K264	Late-Uninfected	0.0656462	0.144834	8.35931	0.661902	0.81481	0.179206	0.0656462	0.0889435
ABCD1_MOUSE|P48410_K610	KO_Early-WT_Early	0.123808	0.151617	8.35931	0.436818	0.605239	0.359699	0.123808	0.218073
ABCD1_MOUSE|P48410_K610	KO_Late-WT_Late	0.234702	0.151617	8.35931	0.1586	0.342214	0.799697	0.234702	0.465703
ABCD1_MOUSE|P48410_K610	KO_Uninfected-WT_Uninfected	0.158048	0.185693	8.35931	0.418411	0.617192	0.378397	0.158048	0.20958
ABCD1_MOUSE|P48410_K610	KO_Early-KO_Uninfected	0.119876	0.151617	8.35931	0.450995	0.795659	0.345828	0.119876	0.0992731
ABCD1_MOUSE|P48410_K610	KO_Late-KO_Uninfected	0.114858	0.151617	8.35931	0.469535	0.758702	0.328332	0.114858	0.119929
ABCD1_MOUSE|P48410_K610	WT_Early-Wt_Uninfected	0.154116	0.185693	8.35931	0.429629	0.700502	0.366907	0.154116	0.15459
ABCD1_MOUSE|P48410_K610	WT_Late-Wt_Uninfected	0.0382038	0.185693	8.35931	0.841919	0.934368	0.0747297	0.0382038	0.0294823
ABCD1_MOUSE|P48410_K610	Infected-Uninfected	0.106763	0.10721	8.35931	0.347278	0.576562	0.459322	0.106763	0.239154
ABCD1_MOUSE|P48410_K610	KO-WT	0.172186	0.09455	8.35931	0.104468	0.178839	0.981015	0.172186	0.747538
ABCD1_MOUSE|P48410_K610	Early-Uninfected	0.136996	0.119864	8.35931	0.284743	0.572419	0.545546	0.136996	0.242286
ABCD1_MOUSE|P48410_K610	Late-Uninfected	0.0765308	0.119864	8.35931	0.540256	0.728572	0.2674	0.0765308	0.137528
ABCE1_MOUSE|P61222_K121	KO_Early-WT_Early	-0.102592	0.218813	19.3593	0.644408	0.772911	0.190839	0.102592	0.11187
ABCE1_MOUSE|P61222_K121	KO_Late-WT_Late	-0.0528114	0.218813	19.3593	0.811819	0.901521	0.0905408	0.0528114	0.0450239
ABCE1_MOUSE|P61222_K121	KO_Uninfected-WT_Uninfected	-0.12673	0.252664	19.3593	0.621621	0.776078	0.206474	0.12673	0.110094
ABCE1_MOUSE|P61222_K121	KO_Early-KO_Uninfected	0.169538	0.236345	19.3593	0.481736	0.812579	0.317191	0.169538	0.0901346
ABCE1_MOUSE|P61222_K121	KO_Late-KO_Uninfected	0.049421	0.236345	19.3593	0.836551	0.945417	0.0775077	0.049421	0.0243766
ABCE1_MOUSE|P61222_K121	WT_Early-Wt_Uninfected	0.1454	0.236345	19.3593	0.545586	0.779735	0.263137	0.1454	0.108053
ABCE1_MOUSE|P61222_K121	WT_Late-Wt_Uninfected	-0.0244979	0.236345	19.3593	0.918511	0.967894	0.0369157	0.0244979	0.0141721
ABCE1_MOUSE|P61222_K121	Infected-Uninfected	0.0849653	0.148137	19.3593	0.572871	0.761347	0.241943	0.0849653	0.118417
ABCE1_MOUSE|P61222_K121	KO-WT	-0.0940447	0.133166	19.3593	0.488462	0.597625	0.311169	0.0940447	0.223571
ABCE1_MOUSE|P61222_K121	Early-Uninfected	0.157469	0.167121	19.3593	0.357679	0.636656	0.446507	0.157469	0.196095
ABCE1_MOUSE|P61222_K121	Late-Uninfected	0.0124615	0.167121	19.3593	0.941325	0.971398	0.0262603	0.0124615	0.0126029
ABCE1_MOUSE|P61222_K169	KO_Early-WT_Early	0.13088	0.149607	19.3593	0.392394	0.562977	0.406277	0.13088	0.24951
ABCE1_MOUSE|P61222_K169	KO_Late-WT_Late	0.341161	0.149607	19.3593	0.0340742	0.134752	1.46757	0.341161	0.870465
ABCE1_MOUSE|P61222_K169	KO_Uninfected-WT_Uninfected	0.0337456	0.172752	19.3593	0.847161	0.924063	0.0720339	0.0337456	0.0342985
ABCE1_MOUSE|P61222_K169	KO_Early-KO_Uninfected	-0.103896	0.161594	19.3593	0.527805	0.83514	0.277526	0.103896	0.0782407
ABCE1_MOUSE|P61222_K169	KO_Late-KO_Uninfected	0.0608424	0.161594	19.3593	0.710631	0.89551	0.148356	0.0608424	0.0479295
ABCE1_MOUSE|P61222_K169	WT_Early-Wt_Uninfected	-0.20103	0.161594	19.3593	0.228338	0.512124	0.641423	0.20103	0.290625
ABCE1_MOUSE|P61222_K169	WT_Late-Wt_Uninfected	-0.246573	0.161594	19.3593	0.143213	0.383462	0.844019	0.246573	0.416278
ABCE1_MOUSE|P61222_K169	Infected-Uninfected	-0.122664	0.101285	19.3593	0.240441	0.466116	0.618991	0.122664	0.331506
ABCE1_MOUSE|P61222_K169	KO-WT	0.168596	0.0910481	19.3593	0.0793805	0.143756	1.10029	0.168596	0.842374
ABCE1_MOUSE|P61222_K169	Early-Uninfected	-0.152463	0.114265	19.3593	0.19759	0.477354	0.704234	0.152463	0.32116
ABCE1_MOUSE|P61222_K169	Late-Uninfected	-0.0928654	0.114265	19.3593	0.426259	0.638169	0.370326	0.0928654	0.195065
ABCE1_MOUSE|P61222_K178	KO_Early-WT_Early	0.0622772	0.200116	8.35931	0.763264	0.856911	0.117325	0.0622772	0.0670645
ABCE1_MOUSE|P61222_K178	KO_Late-WT_Late	0.24212	0.200116	8.35931	0.259419	0.464341	0.585998	0.24212	0.333163
ABCE1_MOUSE|P61222_K178	KO_Uninfected-WT_Uninfected	0.0071021	0.245091	8.35931	0.977563	0.989167	0.00985544	0.0071021	0.00473046
ABCE1_MOUSE|P61222_K178	KO_Early-KO_Uninfected	0.0599123	0.200116	8.35931	0.771953	0.935886	0.112409	0.0599123	0.0287768
ABCE1_MOUSE|P61222_K178	KO_Late-KO_Uninfected	0.189609	0.200116	8.35931	0.369968	0.690274	0.431836	0.189609	0.160978
ABCE1_MOUSE|P61222_K178	WT_Early-Wt_Uninfected	0.00473715	0.245091	8.35931	0.985033	0.995186	0.00654932	0.00473715	0.00209585
ABCE1_MOUSE|P61222_K178	WT_Late-Wt_Uninfected	-0.0454086	0.245091	8.35931	0.857432	0.940873	0.0668003	0.0454086	0.0264688
ABCE1_MOUSE|P61222_K178	Infected-Uninfected	0.0522125	0.141503	8.35931	0.721311	0.852683	0.141877	0.0522125	0.0692125
ABCE1_MOUSE|P61222_K178	KO-WT	0.103833	0.124794	8.35931	0.428517	0.540734	0.368032	0.103833	0.267016
ABCE1_MOUSE|P61222_K178	Early-Uninfected	0.0323247	0.158206	8.35931	0.84299	0.938526	0.0741776	0.0323247	0.0275538
ABCE1_MOUSE|P61222_K178	Late-Uninfected	0.0721003	0.158206	8.35931	0.660185	0.813857	0.180335	0.0721003	0.0894522
ABCE1_MOUSE|P61222_K181	KO_Early-WT_Early	-0.131202	0.169544	19.3593	0.448366	0.615395	0.348368	0.131202	0.210846
ABCE1_MOUSE|P61222_K181	KO_Late-WT_Late	0.0172984	0.169544	19.3593	0.919783	0.959843	0.0363144	0.0172984	0.0177996
ABCE1_MOUSE|P61222_K181	KO_Uninfected-WT_Uninfected	-0.374338	0.195773	19.3593	0.0707774	0.219855	1.15011	0.374338	0.657864
ABCE1_MOUSE|P61222_K181	KO_Early-KO_Uninfected	0.0126164	0.183129	19.3593	0.945781	0.986648	0.0242094	0.0126164	0.00583794
ABCE1_MOUSE|P61222_K181	KO_Late-KO_Uninfected	-0.0621093	0.183129	19.3593	0.738144	0.908411	0.131859	0.0621093	0.0417175
ABCE1_MOUSE|P61222_K181	WT_Early-Wt_Uninfected	-0.230519	0.183129	19.3593	0.223078	0.506446	0.651543	0.230519	0.295467
ABCE1_MOUSE|P61222_K181	WT_Late-Wt_Uninfected	-0.453746	0.183129	19.3593	0.0225908	0.132908	1.64607	0.453746	0.87645
ABCE1_MOUSE|P61222_K181	Infected-Uninfected	-0.183439	0.114782	19.3593	0.126203	0.318998	0.89893	0.183439	0.496212
ABCE1_MOUSE|P61222_K181	KO-WT	-0.162747	0.103181	19.3593	0.130929	0.212781	0.882963	0.162747	0.672068
ABCE1_MOUSE|P61222_K181	Early-Uninfected	-0.108951	0.129492	19.3593	0.41041	0.682194	0.386782	0.108951	0.166092
ABCE1_MOUSE|P61222_K181	Late-Uninfected	-0.257927	0.129492	19.3593	0.0606846	0.199941	1.21692	0.257927	0.699097
ABCE1_MOUSE|P61222_K343	KO_Early-WT_Early	-0.0540294	0.131054	19.3593	0.684672	0.802285	0.164517	0.0540294	0.0956712
ABCE1_MOUSE|P61222_K343	KO_Late-WT_Late	-0.215636	0.131054	19.3593	0.116027	0.281657	0.935442	0.215636	0.550279
ABCE1_MOUSE|P61222_K343	KO_Uninfected-WT_Uninfected	0.179748	0.151328	19.3593	0.249279	0.456885	0.603314	0.179748	0.340193
ABCE1_MOUSE|P61222_K343	KO_Early-KO_Uninfected	-0.0791677	0.141554	19.3593	0.582388	0.857377	0.234788	0.0791677	0.0668281
ABCE1_MOUSE|P61222_K343	KO_Late-KO_Uninfected	-0.277365	0.141554	19.3593	0.064622	0.30597	1.18962	0.277365	0.514321
ABCE1_MOUSE|P61222_K343	WT_Early-Wt_Uninfected	0.15461	0.141554	19.3593	0.288138	0.574911	0.540399	0.15461	0.240399
ABCE1_MOUSE|P61222_K343	WT_Late-Wt_Uninfected	0.118019	0.141554	19.3593	0.414598	0.671801	0.382373	0.118019	0.172759
ABCE1_MOUSE|P61222_K343	Infected-Uninfected	-0.0209759	0.088724	19.3593	0.815592	0.905997	0.088527	0.0209759	0.0428733
ABCE1_MOUSE|P61222_K343	KO-WT	-0.0299724	0.0797569	19.3593	0.711154	0.787446	0.148036	0.0299724	0.103779
ABCE1_MOUSE|P61222_K343	Early-Uninfected	0.0377212	0.100094	19.3593	0.710379	0.878335	0.14851	0.0377212	0.0563399
ABCE1_MOUSE|P61222_K343	Late-Uninfected	-0.079673	0.100094	19.3593	0.435696	0.646373	0.360817	0.079673	0.189517
ABCE1_MOUSE|P61222_K344	KO_Early-WT_Early	-0.19973	0.170528	8.35931	0.273802	0.447273	0.562563	0.19973	0.349427
ABCE1_MOUSE|P61222_K344	KO_Late-WT_Late	-0.001293	0.170528	8.35931	0.994128	0.997051	0.00255766	0.001293	0.00128245
ABCE1_MOUSE|P61222_K344	KO_Uninfected-WT_Uninfected	-0.563796	0.208853	8.35931	0.0260484	0.129722	1.58422	0.563796	0.886987
ABCE1_MOUSE|P61222_K344	KO_Early-KO_Uninfected	0.084938	0.170528	8.35931	0.631261	0.883817	0.199791	0.084938	0.0536377
ABCE1_MOUSE|P61222_K344	KO_Late-KO_Uninfected	0.136167	0.170528	8.35931	0.446671	0.742033	0.350012	0.136167	0.129577
ABCE1_MOUSE|P61222_K344	WT_Early-Wt_Uninfected	-0.279128	0.208853	8.35931	0.216626	0.498895	0.664289	0.279128	0.301991
ABCE1_MOUSE|P61222_K344	WT_Late-Wt_Uninfected	-0.426336	0.208853	8.35931	0.0740064	0.2665	1.13073	0.426336	0.574302
ABCE1_MOUSE|P61222_K344	Infected-Uninfected	-0.12109	0.120582	8.35931	0.343455	0.572164	0.46413	0.12109	0.242479
ABCE1_MOUSE|P61222_K344	KO-WT	-0.25494	0.106343	8.35931	0.0420799	0.087222	1.37593	0.25494	1.05937
ABCE1_MOUSE|P61222_K344	Early-Uninfected	-0.097095	0.134814	8.35931	0.491039	0.74251	0.308884	0.097095	0.129298
ABCE1_MOUSE|P61222_K344	Late-Uninfected	-0.145085	0.134814	8.35931	0.311922	0.533265	0.505954	0.145085	0.273057
ABCE1_MOUSE|P61222_K431	KO_Early-WT_Early	0.237948	0.155022	8.35931	0.161736	0.318519	0.791193	0.237948	0.496864
ABCE1_MOUSE|P61222_K431	KO_Late-WT_Late	0.579191	0.155022	8.35931	0.00530347	0.0463886	2.27544	0.579191	1.33359
ABCE1_MOUSE|P61222_K431	KO_Uninfected-WT_Uninfected	0.559279	0.189862	8.35931	0.0176787	0.102757	1.75255	0.559279	0.988187
ABCE1_MOUSE|P61222_K431	KO_Early-KO_Uninfected	-0.067074	0.155022	8.35931	0.676198	0.896311	0.169926	0.067074	0.0475414
ABCE1_MOUSE|P61222_K431	KO_Late-KO_Uninfected	0.100524	0.155022	8.35931	0.5341	0.79926	0.272378	0.100524	0.097312
ABCE1_MOUSE|P61222_K431	WT_Early-Wt_Uninfected	0.254258	0.189862	8.35931	0.215786	0.497855	0.665977	0.254258	0.302897
ABCE1_MOUSE|P61222_K431	WT_Late-Wt_Uninfected	0.080612	0.189862	8.35931	0.681859	0.849294	0.166305	0.080612	0.0709421
ABCE1_MOUSE|P61222_K431	Infected-Uninfected	0.0920798	0.109617	8.35931	0.424273	0.644089	0.372355	0.0920798	0.191054
ABCE1_MOUSE|P61222_K431	KO-WT	0.458806	0.096673	8.35931	0.00128735	0.00626964	2.8903	0.458806	2.20276
ABCE1_MOUSE|P61222_K431	Early-Uninfected	0.0935918	0.122555	8.35931	0.46607	0.723908	0.331549	0.0935918	0.140317
ABCE1_MOUSE|P61222_K431	Late-Uninfected	0.0905678	0.122555	8.35931	0.480144	0.685385	0.318628	0.0905678	0.164066
ABCE1_MOUSE|P61222_K579	KO_Early-WT_Early	-0.180444	0.117144	19.3593	0.139658	0.289767	0.854934	0.180444	0.53795
ABCE1_MOUSE|P61222_K579	KO_Late-WT_Late	-0.181546	0.117144	19.3593	0.137389	0.312862	0.862049	0.181546	0.504647
ABCE1_MOUSE|P61222_K579	KO_Uninfected-WT_Uninfected	-0.106033	0.135266	19.3593	0.442594	0.637468	0.353994	0.106033	0.195542
ABCE1_MOUSE|P61222_K579	KO_Early-KO_Uninfected	-0.0137303	0.12653	19.3593	0.914704	0.976669	0.0387193	0.0137303	0.0102525
ABCE1_MOUSE|P61222_K579	KO_Late-KO_Uninfected	-0.00393599	0.12653	19.3593	0.975502	0.99468	0.0107716	0.00393599	0.00231675
ABCE1_MOUSE|P61222_K579	WT_Early-Wt_Uninfected	0.0606809	0.12653	19.3593	0.6369	0.836284	0.195929	0.0606809	0.0776464
ABCE1_MOUSE|P61222_K579	WT_Late-Wt_Uninfected	0.0715778	0.12653	19.3593	0.578096	0.790603	0.238	0.0715778	0.102042
ABCE1_MOUSE|P61222_K579	Infected-Uninfected	0.0286481	0.0793066	19.3593	0.721838	0.852706	0.14156	0.0286481	0.0692007
ABCE1_MOUSE|P61222_K579	KO-WT	-0.156008	0.0712913	19.3593	0.0410985	0.0856805	1.38617	0.156008	1.06712
ABCE1_MOUSE|P61222_K579	Early-Uninfected	0.0234753	0.0894699	19.3593	0.795798	0.914549	0.0991969	0.0234753	0.038793
ABCE1_MOUSE|P61222_K579	Late-Uninfected	0.0338209	0.0894699	19.3593	0.709533	0.845359	0.149028	0.0338209	0.0729591
ABCE1_MOUSE|P61222_K93	KO_Early-WT_Early	0.452461	0.232513	8.35931	0.0859775	0.210975	1.06562	0.452461	0.675769
ABCE1_MOUSE|P61222_K93	KO_Late-WT_Late	0.508967	0.232513	8.35931	0.0585919	0.187935	1.23216	0.508967	0.725993
ABCE1_MOUSE|P61222_K93	KO_Uninfected-WT_Uninfected	0.773153	0.284769	8.35931	0.0254161	0.128259	1.59489	0.773153	0.891911
ABCE1_MOUSE|P61222_K93	KO_Early-KO_Uninfected	-0.208082	0.232513	8.35931	0.395862	0.760148	0.402456	0.208082	0.119102
ABCE1_MOUSE|P61222_K93	KO_Late-KO_Uninfected	-0.324803	0.232513	8.35931	0.198407	0.528122	0.702444	0.324803	0.277266
ABCE1_MOUSE|P61222_K93	WT_Early-Wt_Uninfected	0.11261	0.284769	8.35931	0.702417	0.874296	0.153405	0.11261	0.0583414
ABCE1_MOUSE|P61222_K93	WT_Late-Wt_Uninfected	-0.0606168	0.284769	8.35931	0.836533	0.932263	0.0775167	0.0606168	0.0304615
ABCE1_MOUSE|P61222_K93	Infected-Uninfected	-0.120223	0.164411	8.35931	0.484627	0.692799	0.314592	0.120223	0.159393
ABCE1_MOUSE|P61222_K93	KO-WT	0.578194	0.144997	8.35931	0.0036769	0.0135468	2.43452	0.578194	1.86816
ABCE1_MOUSE|P61222_K93	Early-Uninfected	-0.0477364	0.183818	8.35931	0.801382	0.91649	0.0961606	0.0477364	0.0378722
ABCE1_MOUSE|P61222_K93	Late-Uninfected	-0.19271	0.183818	8.35931	0.323829	0.544254	0.489685	0.19271	0.264199
ABCF1_MOUSE|Q6P542_K332	KO_Early-WT_Early	0.382924	1.06105	8.35931	0.727132	0.832601	0.138387	0.382924	0.079563
ABCF1_MOUSE|Q6P542_K332	KO_Late-WT_Late	1.08666	1.06105	8.35931	0.334495	0.543866	0.475611	1.08666	0.264508
ABCF1_MOUSE|Q6P542_K332	KO_Uninfected-WT_Uninfected	-0.871829	1.29952	8.35931	0.520396	0.699676	0.283666	0.871829	0.155103
ABCF1_MOUSE|Q6P542_K332	KO_Early-KO_Uninfected	0.70652	1.06105	8.35931	0.523443	0.83218	0.281131	0.70652	0.0797827
ABCF1_MOUSE|Q6P542_K332	KO_Late-KO_Uninfected	1.28907	1.06105	8.35931	0.257606	0.594191	0.589044	1.28907	0.226074
ABCF1_MOUSE|Q6P542_K332	WT_Early-Wt_Uninfected	-0.548233	1.29952	8.35931	0.683758	0.864864	0.165097	0.548233	0.0630521
ABCF1_MOUSE|Q6P542_K332	WT_Late-Wt_Uninfected	-0.66942	1.29952	8.35931	0.619806	0.814127	0.207744	0.66942	0.0893078
ABCF1_MOUSE|Q6P542_K332	Infected-Uninfected	0.194484	0.750278	8.35931	0.801739	0.899706	0.0959672	0.194484	0.0458993
ABCF1_MOUSE|Q6P542_K332	KO-WT	0.199251	0.661683	8.35931	0.770672	0.834535	0.11313	0.199251	0.0785555
ABCF1_MOUSE|Q6P542_K332	Early-Uninfected	0.0791438	0.838837	8.35931	0.927054	0.972161	0.0328949	0.0791438	0.0122617
ABCF1_MOUSE|Q6P542_K332	Late-Uninfected	0.309824	0.838837	8.35931	0.721049	0.852035	0.142035	0.309824	0.0695426
ABCF2_MOUSE|Q99LE6_K441	KO_Early-WT_Early	0.802258	0.203278	19.3593	0.000839728	0.0113043	3.07586	0.802258	1.94676
ABCF2_MOUSE|Q99LE6_K441	KO_Late-WT_Late	0.784611	0.203278	19.3593	0.00102558	0.0174026	2.98903	0.784611	1.75939
ABCF2_MOUSE|Q99LE6_K441	KO_Uninfected-WT_Uninfected	0.653001	0.234725	19.3593	0.011741	0.0818769	1.93029	0.653001	1.08684
ABCF2_MOUSE|Q99LE6_K441	KO_Early-KO_Uninfected	0.300337	0.219565	19.3593	0.187022	0.585087	0.728107	0.300337	0.23278
ABCF2_MOUSE|Q99LE6_K441	KO_Late-KO_Uninfected	0.614091	0.219565	19.3593	0.0113651	0.119738	1.94443	0.614091	0.921769
ABCF2_MOUSE|Q99LE6_K441	WT_Early-Wt_Uninfected	0.151079	0.219565	19.3593	0.499562	0.750113	0.301411	0.151079	0.124873
ABCF2_MOUSE|Q99LE6_K441	WT_Late-Wt_Uninfected	0.48248	0.219565	19.3593	0.0403475	0.189567	1.39418	0.48248	0.722238
ABCF2_MOUSE|Q99LE6_K441	Infected-Uninfected	0.386997	0.13762	19.3593	0.0109922	0.0688327	1.95891	0.386997	1.1622
ABCF2_MOUSE|Q99LE6_K441	KO-WT	0.746623	0.123711	19.3593	7.69639e-06	0.000143966	5.11371	0.746623	3.84174
ABCF2_MOUSE|Q99LE6_K441	Early-Uninfected	0.225708	0.155256	19.3593	0.162027	0.428436	0.790411	0.225708	0.368114
ABCF2_MOUSE|Q99LE6_K441	Late-Uninfected	0.548286	0.155256	19.3593	0.00217992	0.0207295	2.66156	0.548286	1.68341
ABD12_MOUSE|Q99LR1_K45	KO_Early-WT_Early	-0.681338	0.207211	19.3593	0.00379532	0.0294166	2.42075	0.681338	1.53141
ABD12_MOUSE|Q99LR1_K45	KO_Late-WT_Late	-0.589921	0.207211	19.3593	0.0101813	0.0671168	1.9922	0.589921	1.17317
ABD12_MOUSE|Q99LR1_K45	KO_Uninfected-WT_Uninfected	-1.39639	0.239266	19.3593	1.18246e-05	0.00111994	4.92721	1.39639	2.9508
ABD12_MOUSE|Q99LR1_K45	KO_Early-KO_Uninfected	-0.252113	0.223813	19.3593	0.273748	0.66825	0.562648	0.252113	0.175061
ABD12_MOUSE|Q99LR1_K45	KO_Late-KO_Uninfected	-0.487945	0.223813	19.3593	0.0417819	0.243362	1.37901	0.487945	0.613748
ABD12_MOUSE|Q99LR1_K45	WT_Early-Wt_Uninfected	-0.967162	0.223813	19.3593	0.000354376	0.0114002	3.45054	0.967162	1.94309
ABD12_MOUSE|Q99LR1_K45	WT_Late-Wt_Uninfected	-1.29441	0.223813	19.3593	1.3258e-05	0.000749408	4.87752	1.29441	3.12528
ABD12_MOUSE|Q99LR1_K45	Infected-Uninfected	-0.750407	0.140282	19.3593	3.44594e-05	0.00100453	4.46269	0.750407	2.99804
ABD12_MOUSE|Q99LR1_K45	KO-WT	-0.889215	0.126104	19.3593	9.30941e-07	2.82596e-05	6.03108	0.889215	4.54883
ABD12_MOUSE|Q99LR1_K45	Early-Uninfected	-0.609637	0.15826	19.3593	0.00104385	0.017309	2.98136	0.609637	1.76173
ABD12_MOUSE|Q99LR1_K45	Late-Uninfected	-0.891178	0.15826	19.3593	1.84918e-05	0.000554358	4.73302	0.891178	3.25621
ABD12_MOUSE|Q99LR1_K59	KO_Early-WT_Early	-0.375669	0.198834	8.35931	0.093939	0.223718	1.02715	0.375669	0.650299
ABD12_MOUSE|Q99LR1_K59	KO_Late-WT_Late	-0.43911	0.198834	8.35931	0.0568132	0.184193	1.24555	0.43911	0.734727
ABD12_MOUSE|Q99LR1_K59	KO_Uninfected-WT_Uninfected	-0.406028	0.243521	8.35931	0.132383	0.317782	0.878169	0.406028	0.497871
ABD12_MOUSE|Q99LR1_K59	KO_Early-KO_Uninfected	-0.386601	0.198834	8.35931	0.086197	0.420471	1.06451	0.386601	0.376264
ABD12_MOUSE|Q99LR1_K59	KO_Late-KO_Uninfected	-0.657013	0.198834	8.35931	0.0101474	0.111382	1.99364	0.657013	0.953185
ABD12_MOUSE|Q99LR1_K59	WT_Early-Wt_Uninfected	-0.41696	0.243521	8.35931	0.123592	0.374067	0.908009	0.41696	0.42705
ABD12_MOUSE|Q99LR1_K59	WT_Late-Wt_Uninfected	-0.623932	0.243521	8.35931	0.0323841	0.165248	1.48967	0.623932	0.781864
ABD12_MOUSE|Q99LR1_K59	Infected-Uninfected	-0.521127	0.140597	8.35931	0.00554091	0.0429057	2.25642	0.521127	1.36749
ABD12_MOUSE|Q99LR1_K59	KO-WT	-0.406935	0.123995	8.35931	0.0105022	0.0300667	1.97872	0.406935	1.52191
ABD12_MOUSE|Q99LR1_K59	Early-Uninfected	-0.40178	0.157192	8.35931	0.0327016	0.173622	1.48543	0.40178	0.760394
ABD12_MOUSE|Q99LR1_K59	Late-Uninfected	-0.640473	0.157192	8.35931	0.00324674	0.0274551	2.48855	0.640473	1.56138
ABEC1_MOUSE|P51908_K229	KO_Early-WT_Early	-0.622426	0.174833	8.35931	0.00688958	0.0418287	2.16181	0.622426	1.37853
ABEC1_MOUSE|P51908_K229	KO_Late-WT_Late	-0.258472	0.174833	8.35931	0.175963	0.363745	0.754578	0.258472	0.439203
ABEC1_MOUSE|P51908_K229	KO_Uninfected-WT_Uninfected	-0.087791	0.214125	8.35931	0.692114	0.825229	0.159822	0.087791	0.0834256
ABEC1_MOUSE|P51908_K229	KO_Early-KO_Uninfected	-0.13925	0.174833	8.35931	0.447785	0.794792	0.348931	0.13925	0.0997463
ABEC1_MOUSE|P51908_K229	KO_Late-KO_Uninfected	-0.213679	0.174833	8.35931	0.254976	0.591744	0.5935	0.213679	0.227866
ABEC1_MOUSE|P51908_K229	WT_Early-Wt_Uninfected	0.395386	0.214125	8.35931	0.100425	0.33925	0.998159	0.395386	0.46948
ABEC1_MOUSE|P51908_K229	WT_Late-Wt_Uninfected	-0.0429981	0.214125	8.35931	0.845649	0.936224	0.0728099	0.0429981	0.0286204
ABEC1_MOUSE|P51908_K229	Infected-Uninfected	-0.000135268	0.123625	8.35931	0.999153	0.999287	0.000368162	0.000135268	0.000309713
ABEC1_MOUSE|P51908_K229	KO-WT	-0.322896	0.109027	8.35931	0.0172444	0.0435299	1.76335	0.322896	1.36121
ABEC1_MOUSE|P51908_K229	Early-Uninfected	0.128068	0.138217	8.35931	0.380124	0.658379	0.420075	0.128068	0.181524
ABEC1_MOUSE|P51908_K229	Late-Uninfected	-0.128339	0.138217	8.35931	0.379165	0.597324	0.421171	0.128339	0.22379
ABEC3_MOUSE|Q99J72_K12	KO_Early-WT_Early	-0.0608145	0.158391	19.3593	0.705198	0.817668	0.151689	0.0608145	0.0874231
ABEC3_MOUSE|Q99J72_K12	KO_Late-WT_Late	-0.0734346	0.158391	19.3593	0.648084	0.801837	0.188369	0.0734346	0.0959138
ABEC3_MOUSE|Q99J72_K12	KO_Uninfected-WT_Uninfected	-0.115393	0.182894	19.3593	0.535466	0.710857	0.271268	0.115393	0.148218
ABEC3_MOUSE|Q99J72_K12	KO_Early-KO_Uninfected	-0.249376	0.171082	19.3593	0.16097	0.546788	0.793256	0.249376	0.262181
ABEC3_MOUSE|Q99J72_K12	KO_Late-KO_Uninfected	0.233123	0.171082	19.3593	0.188638	0.516053	0.724371	0.233123	0.287306
ABEC3_MOUSE|Q99J72_K12	WT_Early-Wt_Uninfected	-0.303955	0.171082	19.3593	0.0913413	0.323553	1.03933	0.303955	0.490054
ABEC3_MOUSE|Q99J72_K12	WT_Late-Wt_Uninfected	0.191165	0.171082	19.3593	0.277504	0.541511	0.556731	0.191165	0.266392
ABEC3_MOUSE|Q99J72_K12	Infected-Uninfected	-0.0322609	0.107231	19.3593	0.766733	0.879212	0.115356	0.0322609	0.0559063
ABEC3_MOUSE|Q99J72_K12	KO-WT	-0.083214	0.0963935	19.3593	0.398556	0.509563	0.39951	0.083214	0.292802
ABEC3_MOUSE|Q99J72_K12	Early-Uninfected	-0.276666	0.120973	19.3593	0.0336138	0.17636	1.47348	0.276666	0.753599
ABEC3_MOUSE|Q99J72_K12	Late-Uninfected	0.212144	0.120973	19.3593	0.0953104	0.266234	1.02086	0.212144	0.574737
ABEC3_MOUSE|Q99J72_K260	KO_Early-WT_Early	0.0568457	0.166036	8.35931	0.740522	0.841248	0.130462	0.0568457	0.0750759
ABEC3_MOUSE|Q99J72_K260	KO_Late-WT_Late	0.0284426	0.166036	8.35931	0.868059	0.932589	0.0614508	0.0284426	0.0303097
ABEC3_MOUSE|Q99J72_K260	KO_Uninfected-WT_Uninfected	0.21983	0.203351	8.35931	0.309879	0.518188	0.508807	0.21983	0.285513
ABEC3_MOUSE|Q99J72_K260	KO_Early-KO_Uninfected	-0.453154	0.166036	8.35931	0.0248506	0.237068	1.60466	0.453154	0.625126
ABEC3_MOUSE|Q99J72_K260	KO_Late-KO_Uninfected	0.0308505	0.166036	8.35931	0.857026	0.95308	0.0670058	0.0308505	0.0208708
ABEC3_MOUSE|Q99J72_K260	WT_Early-Wt_Uninfected	-0.290169	0.203351	8.35931	0.189864	0.468817	0.721558	0.290169	0.328997
ABEC3_MOUSE|Q99J72_K260	WT_Late-Wt_Uninfected	0.222238	0.203351	8.35931	0.30494	0.570042	0.515786	0.222238	0.244093
ABEC3_MOUSE|Q99J72_K260	Infected-Uninfected	-0.122559	0.117405	8.35931	0.325779	0.554453	0.487077	0.122559	0.256135
ABEC3_MOUSE|Q99J72_K260	KO-WT	0.101706	0.103541	8.35931	0.353536	0.465258	0.451566	0.101706	0.332306
ABEC3_MOUSE|Q99J72_K260	Early-Uninfected	-0.371661	0.131263	8.35931	0.0211519	0.133336	1.67465	0.371661	0.875051
ABEC3_MOUSE|Q99J72_K260	Late-Uninfected	0.126544	0.131263	8.35931	0.362076	0.58306	0.4412	0.126544	0.234287
ABEC3_MOUSE|Q99J72_K284	KO_Early-WT_Early	-0.100618	0.162691	19.3593	0.543481	0.692361	0.264816	0.100618	0.159667
ABEC3_MOUSE|Q99J72_K284	KO_Late-WT_Late	-0.146142	0.162691	19.3593	0.380072	0.587535	0.420134	0.146142	0.230966
ABEC3_MOUSE|Q99J72_K284	KO_Uninfected-WT_Uninfected	-0.198766	0.187859	19.3593	0.303052	0.511537	0.518483	0.198766	0.291123
ABEC3_MOUSE|Q99J72_K284	KO_Early-KO_Uninfected	-0.0970487	0.175726	19.3593	0.587082	0.859077	0.231302	0.0970487	0.065968
ABEC3_MOUSE|Q99J72_K284	KO_Late-KO_Uninfected	-0.00568054	0.175726	19.3593	0.974543	0.99468	0.011199	0.00568054	0.00231675
ABEC3_MOUSE|Q99J72_K284	WT_Early-Wt_Uninfected	-0.195197	0.175726	19.3593	0.280258	0.567058	0.552441	0.195197	0.246373
ABEC3_MOUSE|Q99J72_K284	WT_Late-Wt_Uninfected	-0.0583049	0.175726	19.3593	0.74361	0.885824	0.128655	0.0583049	0.0526523
ABEC3_MOUSE|Q99J72_K284	Infected-Uninfected	-0.0890579	0.110142	19.3593	0.428586	0.64699	0.367962	0.0890579	0.189103
ABEC3_MOUSE|Q99J72_K284	KO-WT	-0.148509	0.0990104	19.3593	0.149765	0.236371	0.824591	0.148509	0.626406
ABEC3_MOUSE|Q99J72_K284	Early-Uninfected	-0.146123	0.124257	19.3593	0.253865	0.538679	0.595398	0.146123	0.26867
ABEC3_MOUSE|Q99J72_K284	Late-Uninfected	-0.0319927	0.124257	19.3593	0.799531	0.897044	0.0971644	0.0319927	0.0471863
ABEC3_MOUSE|Q99J72_K286	KO_Early-WT_Early	-0.219894	0.363563	19.3593	0.552315	0.699925	0.257813	0.219894	0.154949
ABEC3_MOUSE|Q99J72_K286	KO_Late-WT_Late	-0.0185976	0.363563	19.3593	0.959727	0.979251	0.0178522	0.0185976	0.00910601
ABEC3_MOUSE|Q99J72_K286	KO_Uninfected-WT_Uninfected	0.86876	0.419806	19.3593	0.0521196	0.187193	1.283	0.86876	0.727711
ABEC3_MOUSE|Q99J72_K286	KO_Early-KO_Uninfected	-0.536576	0.392693	19.3593	0.187476	0.585584	0.727055	0.536576	0.232411
ABEC3_MOUSE|Q99J72_K286	KO_Late-KO_Uninfected	0.00545515	0.392693	19.3593	0.989059	0.997231	0.00477798	0.00545515	0.00120424
ABEC3_MOUSE|Q99J72_K286	WT_Early-Wt_Uninfected	0.552079	0.392693	19.3593	0.175608	0.450098	0.755457	0.552079	0.346693
ABEC3_MOUSE|Q99J72_K286	WT_Late-Wt_Uninfected	0.892813	0.392693	19.3593	0.0345534	0.171028	1.46151	0.892813	0.766932
ABEC3_MOUSE|Q99J72_K286	Infected-Uninfected	0.228443	0.246133	19.3593	0.36477	0.59112	0.43798	0.228443	0.228324
ABEC3_MOUSE|Q99J72_K286	KO-WT	0.210089	0.221257	19.3593	0.354058	0.465765	0.450926	0.210089	0.331833
ABEC3_MOUSE|Q99J72_K286	Early-Uninfected	0.00775142	0.277676	19.3593	0.978015	0.992685	0.00965429	0.00775142	0.00318834
ABEC3_MOUSE|Q99J72_K286	Late-Uninfected	0.449134	0.277676	19.3593	0.121954	0.310329	0.913805	0.449134	0.508178
ABEC3_MOUSE|Q99J72_K296	KO_Early-WT_Early	-0.168406	0.681082	19.3593	0.807308	0.883543	0.0929606	0.168406	0.0537724
ABEC3_MOUSE|Q99J72_K296	KO_Late-WT_Late	0.186636	0.681082	19.3593	0.786965	0.888366	0.104045	0.186636	0.0514079
ABEC3_MOUSE|Q99J72_K296	KO_Uninfected-WT_Uninfected	0.305263	0.786446	19.3593	0.702136	0.831942	0.153579	0.305263	0.0799071
ABEC3_MOUSE|Q99J72_K296	KO_Early-KO_Uninfected	0.600914	0.735653	19.3593	0.423956	0.779181	0.372679	0.600914	0.108362
ABEC3_MOUSE|Q99J72_K296	KO_Late-KO_Uninfected	1.34548	0.735653	19.3593	0.082853	0.34394	1.08169	1.34548	0.463517
ABEC3_MOUSE|Q99J72_K296	WT_Early-Wt_Uninfected	1.07458	0.735653	19.3593	0.160133	0.429962	0.79552	1.07458	0.366569
ABEC3_MOUSE|Q99J72_K296	WT_Late-Wt_Uninfected	1.46411	0.735653	19.3593	0.0608768	0.237269	1.21555	1.46411	0.624759
ABEC3_MOUSE|Q99J72_K296	Infected-Uninfected	1.12127	0.461095	19.3593	0.0248868	0.116328	1.60403	1.12127	0.934317
ABEC3_MOUSE|Q99J72_K296	KO-WT	0.107831	0.414493	19.3593	0.797494	0.856508	0.0982728	0.107831	0.0672684
ABEC3_MOUSE|Q99J72_K296	Early-Uninfected	0.837748	0.520185	19.3593	0.123478	0.370947	0.908411	0.837748	0.430688
ABEC3_MOUSE|Q99J72_K296	Late-Uninfected	1.4048	0.520185	19.3593	0.0140187	0.0771178	1.85329	1.4048	1.11285
ABEC3_MOUSE|Q99J72_K37	KO_Early-WT_Early	-0.511191	0.172074	19.3593	0.00774273	0.0449987	2.11111	0.511191	1.3468
ABEC3_MOUSE|Q99J72_K37	KO_Late-WT_Late	-0.314216	0.172074	19.3593	0.0833071	0.230761	1.07932	0.314216	0.636837
ABEC3_MOUSE|Q99J72_K37	KO_Uninfected-WT_Uninfected	-0.430931	0.198694	19.3593	0.0427462	0.167273	1.3691	0.430931	0.776575
ABEC3_MOUSE|Q99J72_K37	KO_Early-KO_Uninfected	-0.333597	0.185861	19.3593	0.0883047	0.422483	1.05402	0.333597	0.37419
ABEC3_MOUSE|Q99J72_K37	KO_Late-KO_Uninfected	-0.144298	0.185861	19.3593	0.44691	0.742311	0.34978	0.144298	0.129414
ABEC3_MOUSE|Q99J72_K37	WT_Early-Wt_Uninfected	-0.253337	0.185861	19.3593	0.188513	0.46665	0.724658	0.253337	0.331009
ABEC3_MOUSE|Q99J72_K37	WT_Late-Wt_Uninfected	-0.261013	0.185861	19.3593	0.176057	0.428018	0.754346	0.261013	0.368538
ABEC3_MOUSE|Q99J72_K37	Infected-Uninfected	-0.248061	0.116495	19.3593	0.0462654	0.172895	1.33474	0.248061	0.762216
[truncated: 110,553 more rows]
